# Supplementary material
Source: HighWire-hosted journal article supplement (https://rmdopen.bmj.com/content/9/4/e003529)
Supplement: inline-supplementary-material-1 [file inline-supplementary-material-1.pdf]

**Detailed correlations between fungi and bacteria in each group****1. Correlations of Control Group P1****2. Correlations of Case Group P138**

| Correlations of Control Group |                                |              |             |                               |
|-------------------------------|--------------------------------|--------------|-------------|-------------------------------|
| Node1 (Bacteria)              | Node2 (Fungi)                  | Correlations | P values    | False discovery rate-p values |
| g_Bacteroides                 | g_Verticillium                 | 0.068715737  | 0.063327659 | 0.421138313                   |
| g_Bacteroides                 | g_unclassified_Tremellomycetes | -0.010509919 | 0.776656895 | 0.920334072                   |
| g_Bacteroides                 | g_Candida                      | 0.001907748  | 0.958933802 | 0.984847119                   |
| g_Bacteroides                 | g_Cladosporium                 | 0.050103205  | 0.176000485 | 0.571420949                   |
| g_Bacteroides                 | g_Deব্যomyces                  | 0.031785059  | 0.390826669 | 0.729791391                   |
| g_Bacteroides                 | g_Aspergillus                  | -0.045416348 | 0.220027935 | 0.607083027                   |
| g_Bacteroides                 | g_Kazachstania                 | 0.016081567  | 0.664229249 | 0.878587467                   |
| g_Bacteroides                 | g_Malassezia                   | 0.038393479  | 0.299898663 | 0.667386268                   |
| g_Bacteroides                 | g_unclassified_Fungi           | -0.007316594 | 0.843449627 | 0.94678943                    |
| g_Bacteroides                 | g_Mycosphaerella               | 0.013764149  | 0.710248624 | 0.902091837                   |
| g_Bacteroides                 | g_Simplicillium                | -0.059190602 | 0.10982051  | 0.492632741                   |
| g_Bacteroides                 | g_unclassified_Cordycipitaceae | 0.06978882   | 0.059301426 | 0.412336263                   |
| g_Bacteroides                 | g_unidentified                 | -0.02803863  | 0.449090448 | 0.762723397                   |
| g_Prevotella                  | g_Verticillium                 | -0.02854028  | 0.441015036 | 0.75910048                    |
| g_Prevotella                  | g_unclassified_Tremellomycetes | -0.057496345 | 0.120386342 | 0.504925989                   |
| g_Prevotella                  | g_Candida                      | 0.0345419    | 0.351031784 | 0.703126667                   |
| g_Prevotella                  | g_Cladosporium                 | -0.052699254 | 0.154625689 | 0.552146547                   |
| g_Prevotella                  | g_Deব্যomyces                  | 0.044966509  | 0.224635589 | 0.612060698                   |
| g_Prevotella                  | g_Aspergillus                  | 0.053420126  | 0.149054495 | 0.545041243                   |
| g_Prevotella                  | g_Kazachstania                 | -0.059053835 | 0.11064533  | 0.49410203                    |
| g_Prevotella                  | g_Malassezia                   | -0.005983146 | 0.871706699 | 0.956423148                   |
| g_Prevotella                  | g_unclassified_Fungi           | 0.029318911  | 0.428646838 | 0.751274884                   |
| g_Prevotella                  | g_Mycosphaerella               | 0.019272088  | 0.602912838 | 0.848214003                   |
| g_Prevotella                  | g_Simplicillium                | 0.049648112  | 0.179963837 | 0.574819597                   |
| g_Prevotella                  | g_unclassified_Cordycipitaceae | -0.084922859 | 0.021659857 | 0.2798591                     |
| g_Prevotella                  | g_unidentified                 | 0.05435668   | 0.142046448 | 0.537119624                   |
| g_Bacteroides_B               | g_Verticillium                 | 0.0290298    | 0.433215562 | 0.754104067                   |
| g_Bacteroides_B               | g_unclassified_Tremellomycetes | -0.022910117 | 0.536283856 | 0.813415158                   |
| g_Bacteroides_B               | g_Candida                      | -0.018145091 | 0.624282648 | 0.85700016                    |
| g_Bacteroides_B               | g_Cladosporium                 | -0.0213448   | 0.564495117 | 0.828788917                   |
| g_Bacteroides_B               | g_Deব্যomyces                  | 0.038350489  | 0.300440552 | 0.667386268                   |
| g_Bacteroides_B               | g_Aspergillus                  | -0.057668371 | 0.119278596 | 0.502959311                   |
| g_Bacteroides_B               | g_Kazachstania                 | 0.013206295  | 0.721493673 | 0.905336886                   |
| g_Bacteroides_B               | g_Malassezia                   | 0.016513251  | 0.655788462 | 0.87366908                    |
| g_Bacteroides_B               | g_unclassified_Fungi           | -0.045548    | 0.218692333 | 0.606447136                   |
| g_Bacteroides_B               | g_Mycosphaerella               | 0.016456287  | 0.656899812 | 0.87431013                    |
| g_Bacteroides_B               | g_Simplicillium                | -0.014111538 | 0.703277568 | 0.897826424                   |
| g_Bacteroides_B               | g_unclassified_Cordycipitaceae | 0.036521432  | 0.324098994 | 0.680696206                   |
| g_Bacteroides_B               | g_unidentified                 | -0.03281456  | 0.375656369 | 0.719866895                   |
| g_Bacteroides_A               | g_Verticillium                 | 0.004798234  | 0.89695518  | 0.965241639                   |
| g_Bacteroides_A               | g_unclassified_Tremellomycetes | -0.072321058 | 0.050635145 | 0.386038256                   |
| g_Bacteroides_A               | g_Candida                      | -0.074163119 | 0.045018814 | 0.368722205                   |
| g_Bacteroides_A               | g_Cladosporium                 | -0.047152939 | 0.202875718 | 0.592719727                   |
| g_Bacteroides_A               | g_Deব্যomyces                  | -0.050231401 | 0.17489585  | 0.570082525                   |
| g_Bacteroides_A               | g_Aspergillus                  | -0.044969571 | 0.224603996 | 0.612060698                   |
| g_Bacteroides_A               | g_Kazachstania                 | -0.012832007 | 0.729072436 | 0.907012052                   |
| g_Bacteroides_A               | g_Malassezia                   | -0.030566086 | 0.409261368 | 0.740561525                   |
| g_Bacteroides_A               | g_unclassified_Fungi           | -0.034979831 | 0.344954742 | 0.696679266                   |
| g_Bacteroides_A               | g_Mycosphaerella               | 0.031003569  | 0.402586635 | 0.736829105                   |
| g_Bacteroides_A               | g_Simplicillium                | -0.027886774 | 0.451551394 | 0.764510797                   |
| g_Bacteroides_A               | g_unclassified_Cordycipitaceae | 0.034679424  | 0.34911615  | 0.701147675                   |
| g_Bacteroides_A               | g_unidentified                 | 0.039128359  | 0.290736156 | 0.660476148                   |
| g_Paraprevotella              | g_Verticillium                 | 0.015660782  | 0.672498059 | 0.881827955                   |
| g_Paraprevotella              | g_unclassified_Tremellomycetes | -0.033136131 | 0.37099322  | 0.717574529                   |
| g_Paraprevotella              | g_Candida                      | -0.041798978 | 0.259033374 | 0.637931914                   |
| g_Paraprevotella              | g_Cladosporium                 | -0.063380186 | 0.086822946 | 0.463850116                   |
| g_Paraprevotella              | g_Deব্যomyces                  | -0.033531084 | 0.36531525  | 0.714031396                   |
| g_Paraprevotella              | g_Aspergillus                  | 0.031568249  | 0.394068202 | 0.730848211                   |
| g_Paraprevotella              | g_Kazachstania                 | -0.053351416 | 0.149578828 | 0.54599626                    |
| g_Paraprevotella              | g_Malassezia                   | 0.00800885   | 0.828856588 | 0.940394309                   |
| g_Paraprevotella              | g_unclassified_Fungi           | -0.039312193 | 0.288473802 | 0.659613931                   |
| g_Paraprevotella              | g_Mycosphaerella               | 0.006433279  | 0.862147777 | 0.953015155                   |
| g_Paraprevotella              | g_Simplicillium                | -0.035184918 | 0.342131961 | 0.695087772                   |
| g_Paraprevotella              | g_unclassified_Cordycipitaceae | 0.016809011  | 0.650030553 | 0.870052588                   |
| g_Paraprevotella              | g_unidentified                 | 0.025724262  | 0.487411433 | 0.783353899                   |
| g_Prevotellamassilia          | g_Verticillium                 | 0.003749599  | 0.919387872 | 0.97209688                    |
| g_Prevotellamassilia          | g_unclassified_Tremellomycetes | -0.04702965  | 0.204060414 | 0.593581285                   |
| g_Prevotellamassilia          | g_Candida                      | 0.049693866  | 0.179562403 | 0.574257008                   |
| g_Prevotellamassilia          | g_Cladosporium                 | -0.04468189  | 0.227586214 | 0.612967811                   |
| g_Prevotellamassilia          | g_Deব্যomyces                  | 0.009825974  | 0.790842497 | 0.926624392                   |
| g_Prevotellamassilia          | g_Aspergillus                  | 0.024854905  | 0.502248564 | 0.793568839                   |
| g_Prevotellamassilia          | g_Kazachstania                 | -0.055383554 | 0.134655853 | 0.523870674                   |

|   |                    |   |                              |              |             |             |
|---|--------------------|---|------------------------------|--------------|-------------|-------------|
| g | Prevotellamassilia | g | Malassezia                   | -0.012471064 | 0.736406115 | 0.907602097 |
| g | Prevotellamassilia | g | unclassified Fungi           | 0.060836745  | 0.100268886 | 0.478819278 |
| g | Prevotellamassilia | g | Mycosphaerella               | 0.04467507   | 0.227657252 | 0.612967811 |
| g | Prevotellamassilia | g | Simplicillium                | 0.061083442  | 0.098896184 | 0.47808105  |
| g | Prevotellamassilia | g | unclassified Cordycipitaceae | -0.041961539 | 0.25718395  | 0.637358445 |
| g | Prevotellamassilia | g | unidentified                 | 0.052946278  | 0.15269908  | 0.549189615 |
| g | CAG-462            | g | Verticillium                 | 0.06256835   | 0.090947114 | 0.469693686 |
| g | CAG-462            | g | unclassified Tremellomycetes | -0.036946654 | 0.318493623 | 0.676223819 |
| g | CAG-462            | g | Candida                      | -0.003776524 | 0.918811009 | 0.97179991  |
| g | CAG-462            | g | Cladosporium                 | 0.010634662  | 0.774077446 | 0.918614728 |
| g | CAG-462            | g | Debaryomyces                 | 0.025538822  | 0.490556358 | 0.785229929 |
| g | CAG-462            | g | Aspergillus                  | -0.040166126 | 0.278120462 | 0.655326371 |
| g | CAG-462            | g | Kazachstania                 | 0.058069988  | 0.116723457 | 0.500388653 |
| g | CAG-462            | g | Malassezia                   | 0.045958743  | 0.21456274  | 0.601936086 |
| g | CAG-462            | g | unclassified Fungi           | -0.034074557 | 0.357591182 | 0.708354529 |
| g | CAG-462            | g | Mycosphaerella               | 0.038822488  | 0.294526687 | 0.663406003 |
| g | CAG-462            | g | Simplicillium                | -0.039073004 | 0.291419703 | 0.660859538 |
| g | CAG-462            | g | unclassified Cordycipitaceae | 0.074483118  | 0.044098684 | 0.365142621 |
| g | CAG-462            | g | unidentified                 | -0.011767486 | 0.750770022 | 0.910387945 |
| g | MGYG-HGUT-03221    | g | Verticillium                 | 0.020512664  | 0.579777138 | 0.836998864 |
| g | MGYG-HGUT-03221    | g | unclassified Tremellomycetes | -0.01857937  | 0.616009226 | 0.854111503 |
| g | MGYG-HGUT-03221    | g | Candida                      | 0.019183309  | 0.604584275 | 0.849300857 |
| g | MGYG-HGUT-03221    | g | Cladosporium                 | -0.001810124 | 0.961033559 | 0.985622904 |
| g | MGYG-HGUT-03221    | g | Debaryomyces                 | 0.085107237  | 0.021375582 | 0.278567009 |
| g | MGYG-HGUT-03221    | g | Aspergillus                  | -0.0663334   | 0.073074977 | 0.443355619 |
| g | MGYG-HGUT-03221    | g | Kazachstania                 | 0.03880551   | 0.29473804  | 0.66362206  |
| g | MGYG-HGUT-03221    | g | Malassezia                   | 0.007068745  | 0.848687737 | 0.948844547 |
| g | MGYG-HGUT-03221    | g | unclassified Fungi           | -0.031101829 | 0.401096469 | 0.735790931 |
| g | MGYG-HGUT-03221    | g | Mycosphaerella               | 0.027782072  | 0.453252581 | 0.765162867 |
| g | MGYG-HGUT-03221    | g | Simplicillium                | -0.023819622 | 0.520223767 | 0.804338012 |
| g | MGYG-HGUT-03221    | g | unclassified Cordycipitaceae | 0.037988859  | 0.305024633 | 0.670057703 |
| g | MGYG-HGUT-03221    | g | unidentified                 | -0.034257693 | 0.355011655 | 0.70588751  |
| g | MGYG-HGUT-02575    | g | Verticillium                 | 0.016646218  | 0.653197286 | 0.872413692 |
| g | MGYG-HGUT-02575    | g | unclassified Tremellomycetes | -0.03049401  | 0.410367304 | 0.741461192 |
| g | MGYG-HGUT-02575    | g | Candida                      | -0.046741662 | 0.206847286 | 0.596774793 |
| g | MGYG-HGUT-02575    | g | Cladosporium                 | 0.001061512  | 0.977142932 | 0.991604689 |
| g | MGYG-HGUT-02575    | g | Debaryomyces                 | -0.04164134  | 0.260835558 | 0.638638484 |
| g | MGYG-HGUT-02575    | g | Aspergillus                  | -0.0419163   | 0.257697701 | 0.637448375 |
| g | MGYG-HGUT-02575    | g | Kazachstania                 | -0.033185243 | 0.370284218 | 0.717120717 |
| g | MGYG-HGUT-02575    | g | Malassezia                   | 0.032364845  | 0.382238011 | 0.723410923 |
| g | MGYG-HGUT-02575    | g | unclassified Fungi           | -0.017435477 | 0.637903388 | 0.863871725 |
| g | MGYG-HGUT-02575    | g | Mycosphaerella               | 0.034333086  | 0.353953135 | 0.705388488 |
| g | MGYG-HGUT-02575    | g | Simplicillium                | -0.032210816 | 0.38450838  | 0.725207645 |
| g | MGYG-HGUT-02575    | g | unclassified Cordycipitaceae | 0.041707575  | 0.260077283 | 0.638398936 |
| g | MGYG-HGUT-02575    | g | unidentified                 | 0.043612494  | 0.238918631 | 0.622994378 |
| g | MGYG-HGUT-02291    | g | Verticillium                 | 0.038446348  | 0.299233141 | 0.667036301 |
| g | MGYG-HGUT-02291    | g | unclassified Tremellomycetes | -0.033059414 | 0.372102435 | 0.717884076 |
| g | MGYG-HGUT-02291    | g | Candida                      | -0.037782051 | 0.30766688  | 0.670833121 |
| g | MGYG-HGUT-02291    | g | Cladosporium                 | 0.016638421  | 0.653349123 | 0.872421924 |
| g | MGYG-HGUT-02291    | g | Debaryomyces                 | 0.029429393  | 0.426908332 | 0.74986268  |
| g | MGYG-HGUT-02291    | g | Aspergillus                  | -0.067278836 | 0.069069342 | 0.437921977 |
| g | MGYG-HGUT-02291    | g | Kazachstania                 | 0.035328975  | 0.340158041 | 0.694699556 |
| g | MGYG-HGUT-02291    | g | Malassezia                   | 0.029840359  | 0.420477656 | 0.74604389  |
| g | MGYG-HGUT-02291    | g | unclassified Fungi           | -0.031572554 | 0.394003679 | 0.730848211 |
| g | MGYG-HGUT-02291    | g | Mycosphaerella               | 0.000764336  | 0.983540799 | 0.993484837 |
| g | MGYG-HGUT-02291    | g | Simplicillium                | -0.037896458 | 0.306203321 | 0.670475339 |
| g | MGYG-HGUT-02291    | g | unclassified Cordycipitaceae | 0.076634367  | 0.038315327 | 0.344312023 |
| g | MGYG-HGUT-02291    | g | unidentified                 | -0.018303207 | 0.621264851 | 0.856123107 |
| g | CAG-617            | g | Verticillium                 | 0.066381027  | 0.07286875  | 0.443159258 |
| g | CAG-617            | g | unclassified Tremellomycetes | -0.082690703 | 0.025370553 | 0.296002437 |
| g | CAG-617            | g | Candida                      | -0.00597719  | 0.871833304 | 0.956423148 |
| g | CAG-617            | g | Cladosporium                 | 0.012097993  | 0.744011465 | 0.909574751 |
| g | CAG-617            | g | Debaryomyces                 | -0.040763465 | 0.271029984 | 0.649024505 |
| g | CAG-617            | g | Aspergillus                  | 0.005973497  | 0.871911811 | 0.956423148 |
| g | CAG-617            | g | Kazachstania                 | -0.001582192 | 0.965937036 | 0.988066285 |
| g | CAG-617            | g | Malassezia                   | 0.013510213  | 0.715359759 | 0.902925307 |
| g | CAG-617            | g | unclassified Fungi           | 0.030474248  | 0.410670843 | 0.741843438 |
| g | CAG-617            | g | Mycosphaerella               | 0.032646531  | 0.378107281 | 0.721666439 |
| g | CAG-617            | g | Simplicillium                | -0.029310051 | 0.428786433 | 0.751274884 |
| g | CAG-617            | g | unclassified Cordycipitaceae | 0.050283842  | 0.17444547  | 0.569927454 |
| g | CAG-617            | g | unidentified                 | 0.034120643  | 0.356940941 | 0.707666908 |
| g | UBA6398            | g | Verticillium                 | 0.075055503  | 0.042492341 | 0.358861898 |
| g | UBA6398            | g | unclassified Tremellomycetes | -0.056321487 | 0.128167897 | 0.51521926  |
| g | UBA6398            | g | Candida                      | 0.01364196   | 0.712706397 | 0.902091837 |
| g | UBA6398            | g | Cladosporium                 | -0.001207754 | 0.973995004 | 0.990490577 |
| g | UBA6398            | g | Debaryomyces                 | -0.011028121 | 0.765957919 | 0.916246548 |
| g | UBA6398            | g | Aspergillus                  | -0.038737804 | 0.29558195  | 0.664368775 |
| g | UBA6398            | g | Kazachstania                 | -0.003116811 | 0.932956862 | 0.976416726 |

|                   |                                |              |             |             |
|-------------------|--------------------------------|--------------|-------------|-------------|
| g UBA6398         | g Malassezia                   | 0.050718993  | 0.170741544 | 0.564974052 |
| g UBA6398         | g unclassified Fungi           | 0.055620386  | 0.13299418  | 0.521431795 |
| g UBA6398         | g Mycosphaerella               | 0.043874     | 0.236111416 | 0.61998288  |
| g UBA6398         | g Simplicillium                | 0.037481562  | 0.311532894 | 0.672399691 |
| g UBA6398         | g unclassified Cordycipitaceae | -0.009429926 | 0.799088945 | 0.929634918 |
| g UBA6398         | g unidentified                 | 0.071150351  | 0.054500373 | 0.399257624 |
| g MGYG-HGUT-03543 | g Verticillium                 | 0.093818494  | 0.011154206 | 0.204210749 |
| g MGYG-HGUT-03543 | g unclassified Tremellomycetes | -0.081175404 | 0.028191792 | 0.307552108 |
| g MGYG-HGUT-03543 | g Candida                      | 0.047080049  | 0.203575522 | 0.593377363 |
| g MGYG-HGUT-03543 | g Cladosporium                 | -0.066043406 | 0.074340971 | 0.444208845 |
| g MGYG-HGUT-03543 | g Debaryomyces                 | -0.041034827 | 0.26785009  | 0.644978472 |
| g MGYG-HGUT-03543 | g Aspergillus                  | 0.117087597  | 0.001518132 | 0.075384204 |
| g MGYG-HGUT-03543 | g Kazachstania                 | -0.054306034 | 0.142418845 | 0.537282076 |
| g MGYG-HGUT-03543 | g Malassezia                   | 0.023027744  | 0.534192863 | 0.812076472 |
| g MGYG-HGUT-03543 | g unclassified Fungi           | 0.024213119  | 0.513352864 | 0.801060655 |
| g MGYG-HGUT-03543 | g Mycosphaerella               | 0.060852434  | 0.100181139 | 0.478819278 |
| g MGYG-HGUT-03543 | g Simplicillium                | 0.014423926  | 0.697030039 | 0.895302916 |
| g MGYG-HGUT-03543 | g unclassified Cordycipitaceae | 0.044815631  | 0.226196314 | 0.612967811 |
| g MGYG-HGUT-03543 | g unidentified                 | 0.041147513  | 0.266537139 | 0.644684802 |
| g UBA4334         | g Verticillium                 | -0.055848314 | 0.131409989 | 0.518655697 |
| g UBA4334         | g unclassified Tremellomycetes | -0.069162553 | 0.061624612 | 0.416951176 |
| g UBA4334         | g Candida                      | 0.054688017  | 0.139628533 | 0.533896229 |
| g UBA4334         | g Cladosporium                 | -0.046192345 | 0.212239285 | 0.600680647 |
| g UBA4334         | g Debaryomyces                 | 0.006970351  | 0.850769072 | 0.949366057 |
| g UBA4334         | g Aspergillus                  | 0.046740574  | 0.206857866 | 0.596774793 |
| g UBA4334         | g Kazachstania                 | -0.075618135 | 0.040961781 | 0.354132002 |
| g UBA4334         | g Malassezia                   | -0.028826608 | 0.436443287 | 0.755981115 |
| g UBA4334         | g unclassified Fungi           | 0.00422001   | 0.909315713 | 0.96911863  |
| g UBA4334         | g Mycosphaerella               | 0.006944085  | 0.851324857 | 0.949400054 |
| g UBA4334         | g Simplicillium                | 0.025284689  | 0.49488387  | 0.787688967 |
| g UBA4334         | g unclassified Cordycipitaceae | -0.102945035 | 0.005336815 | 0.14083337  |
| g UBA4334         | g unidentified                 | 0.03097475   | 0.403024309 | 0.736936858 |
| g 43-108          | g Verticillium                 | 0.047649097  | 0.198158607 | 0.58591995  |
| g 43-108          | g unclassified Tremellomycetes | -0.029914124 | 0.419329444 | 0.745521535 |
| g 43-108          | g Candida                      | -0.028191275 | 0.446624394 | 0.761832544 |
| g 43-108          | g Cladosporium                 | -0.020684555 | 0.576604566 | 0.836262521 |
| g 43-108          | g Debaryomyces                 | -0.034216102 | 0.355596444 | 0.706489987 |
| g 43-108          | g Aspergillus                  | -0.031427786 | 0.396176899 | 0.732287153 |
| g 43-108          | g Kazachstania                 | -0.005288516 | 0.886493962 | 0.96210924  |
| g 43-108          | g Malassezia                   | 0.018279179  | 0.621723025 | 0.856123107 |
| g 43-108          | g unclassified Fungi           | 0.004149234  | 0.910830239 | 0.969560969 |
| g 43-108          | g Mycosphaerella               | 0.042152033  | 0.255028393 | 0.635347198 |
| g 43-108          | g Simplicillium                | -0.043625586 | 0.238777531 | 0.622994378 |
| g 43-108          | g unclassified Cordycipitaceae | 0.073240994  | 0.047761103 | 0.377500268 |
| g 43-108          | g unidentified                 | 0.015820424  | 0.669356234 | 0.880657424 |
| g Bacteroides C   | g Verticillium                 | 0.039526168  | 0.285855487 | 0.658995314 |
| g Bacteroides C   | g unclassified Tremellomycetes | -0.030394377 | 0.411898999 | 0.742316502 |
| g Bacteroides C   | g Candida                      | 0.025556842  | 0.490250269 | 0.785111149 |
| g Bacteroides C   | g Cladosporium                 | -0.00654073  | 0.859868907 | 0.952651851 |
| g Bacteroides C   | g Debaryomyces                 | 0.045373993  | 0.220458866 | 0.607083027 |
| g Bacteroides C   | g Aspergillus                  | -0.039497869 | 0.286200844 | 0.659056958 |
| g Bacteroides C   | g Kazachstania                 | 0.035331274  | 0.340126598 | 0.694699556 |
| g Bacteroides C   | g Malassezia                   | -0.012008937 | 0.745830666 | 0.909574751 |
| g Bacteroides C   | g unclassified Fungi           | -0.024718704 | 0.504594488 | 0.795181561 |
| g Bacteroides C   | g Mycosphaerella               | 0.007394581  | 0.841802855 | 0.945968153 |
| g Bacteroides C   | g Simplicillium                | -0.023118342 | 0.532585157 | 0.811490628 |
| g Bacteroides C   | g unclassified Cordycipitaceae | 0.058991664  | 0.111021886 | 0.494471808 |
| g Bacteroides C   | g unidentified                 | -0.035928693 | 0.332018921 | 0.68778737  |
| g UBA6382         | g Verticillium                 | 0.008511685  | 0.818293151 | 0.936487497 |
| g UBA6382         | g unclassified Tremellomycetes | -0.060191321 | 0.103932002 | 0.483414571 |
| g UBA6382         | g Candida                      | 0.045382782  | 0.220369399 | 0.607083027 |
| g UBA6382         | g Cladosporium                 | -0.043055533 | 0.244975602 | 0.628403245 |
| g UBA6382         | g Debaryomyces                 | 0.035435671  | 0.338700745 | 0.693255567 |
| g UBA6382         | g Aspergillus                  | 0.03301302   | 0.37277422  | 0.718373632 |
| g UBA6382         | g Kazachstania                 | -0.0872456   | 0.018308277 | 0.261808365 |
| g UBA6382         | g Malassezia                   | 0.008935837  | 0.809408095 | 0.933584001 |
| g UBA6382         | g unclassified Fungi           | 0.055338169  | 0.134976101 | 0.524538048 |
| g UBA6382         | g Mycosphaerella               | 0.030159333  | 0.4155258   | 0.743848203 |
| g UBA6382         | g Simplicillium                | 0.015537922  | 0.67491991  | 0.883433477 |
| g UBA6382         | g unclassified Cordycipitaceae | -0.044784049 | 0.226523987 | 0.612967811 |
| g UBA6382         | g unidentified                 | 0.056890797  | 0.124349734 | 0.508701089 |
| g UBA1786         | g Verticillium                 | -0.014176866 | 0.701969371 | 0.897212331 |
| g UBA1786         | g unclassified Tremellomycetes | -0.067570292 | 0.067871435 | 0.434755158 |
| g UBA1786         | g Candida                      | 0.011519869  | 0.755846124 | 0.911989902 |
| g UBA1786         | g Cladosporium                 | -0.040725209 | 0.271480348 | 0.649109772 |
| g UBA1786         | g Debaryomyces                 | 0.009602982  | 0.79548279  | 0.9286044   |
| g UBA1786         | g Aspergillus                  | 0.0213208    | 0.564933156 | 0.829039606 |
| g UBA1786         | g Kazachstania                 | -0.077496154 | 0.036186124 | 0.337675685 |

|                   |                                |              |             |             |
|-------------------|--------------------------------|--------------|-------------|-------------|
| g UBA1786         | g Malassezia                   | 0.025300802  | 0.494608885 | 0.787688967 |
| g UBA1786         | g unclassified Fungi           | 0.043646295  | 0.238554473 | 0.622994378 |
| g UBA1786         | g Mycosphaerella               | -0.005579518 | 0.880294016 | 0.959644718 |
| g UBA1786         | g Simplicillium                | 0.010875463  | 0.769105221 | 0.917136742 |
| g UBA1786         | g unclassified Cordycipitaceae | -0.091448471 | 0.013381679 | 0.224405865 |
| g UBA1786         | g unidentified                 | 0.067364033  | 0.068717397 | 0.436737234 |
| g MGYG-HGUT-03610 | g Verticillium                 | 0.035984168  | 0.33127244  | 0.687223086 |
| g MGYG-HGUT-03610 | g unclassified Tremellomycetes | -0.026335938 | 0.47711533  | 0.778886947 |
| g MGYG-HGUT-03610 | g Candida                      | -0.001882442 | 0.959478077 | 0.984964676 |
| g MGYG-HGUT-03610 | g Cladosporium                 | -0.024843789 | 0.502439814 | 0.793568839 |
| g MGYG-HGUT-03610 | g Debaryomyces                 | 0.022140317  | 0.550068921 | 0.818853556 |
| g MGYG-HGUT-03610 | g Aspergillus                  | -0.031817579 | 0.39034186  | 0.72965864  |
| g MGYG-HGUT-03610 | g Kazachstania                 | 0.043371374  | 0.241527756 | 0.625513145 |
| g MGYG-HGUT-03610 | g Malassezia                   | 0.035937902  | 0.331894934 | 0.68778737  |
| g MGYG-HGUT-03610 | g unclassified Fungi           | -0.018329807 | 0.62075778  | 0.856123107 |
| g MGYG-HGUT-03610 | g Mycosphaerella               | 0.03944078   | 0.28689841  | 0.659118154 |
| g MGYG-HGUT-03610 | g Simplicillium                | -0.037400938 | 0.312575589 | 0.672824117 |
| g MGYG-HGUT-03610 | g unclassified Cordycipitaceae | 0.032423123  | 0.381381144 | 0.723098466 |
| g MGYG-HGUT-03610 | g unidentified                 | 0.008968856  | 0.808717432 | 0.933478229 |
| g UBA4372         | g Verticillium                 | -0.006290572 | 0.865176169 | 0.954571392 |
| g UBA4372         | g unclassified Tremellomycetes | -0.05802242  | 0.117023835 | 0.500949117 |
| g UBA4372         | g Candida                      | 0.08121783   | 0.028109275 | 0.307552108 |
| g UBA4372         | g Cladosporium                 | -0.078958033 | 0.032804397 | 0.325643644 |
| g UBA4372         | g Debaryomyces                 | 0.061361163  | 0.097368812 | 0.477459115 |
| g UBA4372         | g Aspergillus                  | 0.021140098  | 0.56823644  | 0.83054176  |
| g UBA4372         | g Kazachstania                 | -0.080639396 | 0.029252392 | 0.312580107 |
| g UBA4372         | g Malassezia                   | 0.00321441   | 0.930862662 | 0.975865731 |
| g UBA4372         | g unclassified Fungi           | 0.022897332  | 0.536511392 | 0.813415158 |
| g UBA4372         | g Mycosphaerella               | 0.002791641  | 0.939937357 | 0.978000513 |
| g UBA4372         | g Simplicillium                | 0.042611212  | 0.249884123 | 0.631737101 |
| g UBA4372         | g unclassified Cordycipitaceae | -0.058994845 | 0.111002591 | 0.494471808 |
| g UBA4372         | g unidentified                 | 0.024468305  | 0.508922366 | 0.7985493   |
| g F0040           | g Verticillium                 | -0.011242632 | 0.761541935 | 0.914666261 |
| g F0040           | g unclassified Tremellomycetes | -0.021448395 | 0.56260624  | 0.827219568 |
| g F0040           | g Candida                      | 0.14327548   | 0.000101414 | 0.018409489 |
| g F0040           | g Cladosporium                 | -0.021305162 | 0.565218656 | 0.829039606 |
| g F0040           | g Debaryomyces                 | 0.014454925  | 0.696411182 | 0.895302916 |
| g F0040           | g Aspergillus                  | 0.00649279   | 0.860885493 | 0.953015155 |
| g F0040           | g Kazachstania                 | -0.016344343 | 0.659085998 | 0.875156242 |
| g F0040           | g Malassezia                   | -0.013679893 | 0.711943073 | 0.902091837 |
| g F0040           | g unclassified Fungi           | 0.065817971  | 0.075337431 | 0.444977361 |
| g F0040           | g Mycosphaerella               | 0.046805608  | 0.206226106 | 0.595517977 |
| g F0040           | g Simplicillium                | 0.058874088  | 0.111736772 | 0.495063318 |
| g F0040           | g unclassified Cordycipitaceae | -0.000261988 | 0.99435801  | 0.997274144 |
| g F0040           | g unidentified                 | -0.022746288 | 0.539203014 | 0.815120899 |
| g Allopevotella   | g Verticillium                 | 0.075963653  | 0.040045155 | 0.350685903 |
| g Allopevotella   | g unclassified Tremellomycetes | -0.077606718 | 0.035920382 | 0.337275497 |
| g Allopevotella   | g Candida                      | -0.018640937 | 0.614840231 | 0.853151823 |
| g Allopevotella   | g Cladosporium                 | -0.043271545 | 0.242613829 | 0.626487849 |
| g Allopevotella   | g Debaryomyces                 | -0.015355481 | 0.678522415 | 0.885522992 |
| g Allopevotella   | g Aspergillus                  | -0.00223787  | 0.95183558  | 0.982634054 |
| g Allopevotella   | g Kazachstania                 | 0.005915321  | 0.873148669 | 0.957080922 |
| g Allopevotella   | g Malassezia                   | 0.002800196  | 0.939753638 | 0.978000513 |
| g Allopevotella   | g unclassified Fungi           | 0.013885389  | 0.707812914 | 0.900771504 |
| g Allopevotella   | g Mycosphaerella               | 0.015679687  | 0.672125698 | 0.881783585 |
| g Allopevotella   | g Simplicillium                | 0.031523472  | 0.394739675 | 0.73103522  |
| g Allopevotella   | g unclassified Cordycipitaceae | 0.036741226  | 0.321193657 | 0.678324987 |
| g Allopevotella   | g unidentified                 | 0.029300821  | 0.42893188  | 0.751274884 |
| g MGYG-HGUT-02178 | g Verticillium                 | 0.074691578  | 0.043507835 | 0.363506278 |
| g MGYG-HGUT-02178 | g unclassified Tremellomycetes | -0.067686604 | 0.067398166 | 0.433701498 |
| g MGYG-HGUT-02178 | g Candida                      | 0.017642736  | 0.633912227 | 0.861635763 |
| g MGYG-HGUT-02178 | g Cladosporium                 | -0.080728509 | 0.029073724 | 0.311710386 |
| g MGYG-HGUT-02178 | g Debaryomyces                 | -0.088018141 | 0.017298731 | 0.256989733 |
| g MGYG-HGUT-02178 | g Aspergillus                  | -0.042377024 | 0.252498665 | 0.633802908 |
| g MGYG-HGUT-02178 | g Kazachstania                 | -0.034827206 | 0.347065023 | 0.698353694 |
| g MGYG-HGUT-02178 | g Malassezia                   | 0.012718884  | 0.731368261 | 0.907315107 |
| g MGYG-HGUT-02178 | g unclassified Fungi           | 0.02863587   | 0.43948573  | 0.758246834 |
| g MGYG-HGUT-02178 | g Mycosphaerella               | 0.015312805  | 0.679366169 | 0.885977623 |
| g MGYG-HGUT-02178 | g Simplicillium                | 0.022487144  | 0.543836658 | 0.816215242 |
| g MGYG-HGUT-02178 | g unclassified Cordycipitaceae | 0.053886995  | 0.145528772 | 0.540957635 |
| g MGYG-HGUT-02178 | g unidentified                 | 0.038721664  | 0.295783357 | 0.664398106 |
| g MGYG-HGUT-03559 | g Verticillium                 | 0.000790883  | 0.982969236 | 0.993395456 |
| g MGYG-HGUT-03559 | g unclassified Tremellomycetes | -0.072288792 | 0.050738518 | 0.386269784 |
| g MGYG-HGUT-03559 | g Candida                      | -0.034853965 | 0.346694445 | 0.697873429 |
| g MGYG-HGUT-03559 | g Cladosporium                 | -0.045113531 | 0.223122151 | 0.61041329  |
| g MGYG-HGUT-03559 | g Debaryomyces                 | -0.017365141 | 0.639260214 | 0.86388896  |
| g MGYG-HGUT-03559 | g Aspergillus                  | 0.044789742  | 0.226464896 | 0.612967811 |
| g MGYG-HGUT-03559 | g Kazachstania                 | -0.068920976 | 0.062540628 | 0.418274134 |



|                   |                                |              |             |             |
|-------------------|--------------------------------|--------------|-------------|-------------|
| g MGYG-HGUT-03559 | g Malassezia                   | 0.046683477  | 0.207413677 | 0.597418526 |
| g MGYG-HGUT-03559 | g unclassified Fungi           | 0.01983926   | 0.592284075 | 0.843305185 |
| g MGYG-HGUT-03559 | g Mycosphaerella               | 0.051277838  | 0.166071391 | 0.562541523 |
| g MGYG-HGUT-03559 | g Simplicillium                | -0.005800656 | 0.875587431 | 0.957673757 |
| g MGYG-HGUT-03559 | g unclassified Cordycipitaceae | -0.027140617 | 0.463753398 | 0.769673534 |
| g MGYG-HGUT-03559 | g unidentified                 | 0.066723814  | 0.071398451 | 0.442093864 |
| g Alistipes       | g Verticillium                 | 0.069725705  | 0.05953222  | 0.412336263 |
| g Alistipes       | g unclassified Tremellomycetes | -0.024990042 | 0.499926664 | 0.791370491 |
| g Alistipes       | g Candida                      | -0.035054539 | 0.343924767 | 0.695739224 |
| g Alistipes       | g Cladosporium                 | 0.031221895  | 0.399280103 | 0.73430345  |
| g Alistipes       | g Debaryomyces                 | -0.141730946 | 0.000120627 | 0.018499625 |
| g Alistipes       | g Aspergillus                  | 0.060938157  | 0.099702775 | 0.478320958 |
| g Alistipes       | g Kazachstania                 | 0.007887199  | 0.831416929 | 0.941068985 |
| g Alistipes       | g Malassezia                   | 0.051772649  | 0.162016969 | 0.559767285 |
| g Alistipes       | g unclassified Fungi           | 0.085856288  | 0.020253783 | 0.273942808 |
| g Alistipes       | g Mycosphaerella               | 0.022047781  | 0.551737638 | 0.820005483 |
| g Alistipes       | g Simplicillium                | -0.055218203 | 0.135825455 | 0.526292556 |
| g Alistipes       | g unclassified Cordycipitaceae | 0.080116955  | 0.030318937 | 0.315608804 |
| g Alistipes       | g unidentified                 | 0.012452942  | 0.73677496  | 0.907763268 |
| g Alistipes A     | g Verticillium                 | 0.064302194  | 0.082323253 | 0.455217912 |
| g Alistipes A     | g unclassified Tremellomycetes | -0.056906434 | 0.124246126 | 0.508701089 |
| g Alistipes A     | g Candida                      | -0.010757793 | 0.771533796 | 0.917860667 |
| g Alistipes A     | g Cladosporium                 | 0.024705058  | 0.504829841 | 0.795311803 |
| g Alistipes A     | g Debaryomyces                 | -0.114072969 | 0.002008296 | 0.084840998 |
| g Alistipes A     | g Aspergillus                  | 0.068590472  | 0.063812014 | 0.421773102 |
| g Alistipes A     | g Kazachstania                 | -0.037895246 | 0.306218797 | 0.670475339 |
| g Alistipes A     | g Malassezia                   | 0.046992733  | 0.204416133 | 0.594053722 |
| g Alistipes A     | g unclassified Fungi           | 0.102577584  | 0.005503715 | 0.143803232 |
| g Alistipes A     | g Mycosphaerella               | 0.03675604   | 0.320998456 | 0.678140479 |
| g Alistipes A     | g Simplicillium                | -0.058489737 | 0.11409902  | 0.497329568 |
| g Alistipes A     | g unclassified Cordycipitaceae | 0.070505264  | 0.05673316  | 0.40482151  |
| g Alistipes A     | g unidentified                 | 0.047728988  | 0.197406615 | 0.58591995  |
| g Tidjanibacter   | g Verticillium                 | 0.062613038  | 0.090716079 | 0.469307225 |
| g Tidjanibacter   | g unclassified Tremellomycetes | -0.047524935 | 0.199331474 | 0.586738708 |
| g Tidjanibacter   | g Candida                      | -0.039498671 | 0.286191047 | 0.659056958 |
| g Tidjanibacter   | g Cladosporium                 | 0.006641326  | 0.857736455 | 0.952106527 |
| g Tidjanibacter   | g Debaryomyces                 | -0.112458261 | 0.002326832 | 0.092219249 |
| g Tidjanibacter   | g Aspergillus                  | 0.043328545  | 0.241993288 | 0.626258982 |
| g Tidjanibacter   | g Kazachstania                 | -0.001328381 | 0.971398768 | 0.989767997 |
| g Tidjanibacter   | g Malassezia                   | 0.042981197  | 0.245792071 | 0.628861629 |
| g Tidjanibacter   | g unclassified Fungi           | 0.032991882  | 0.373080547 | 0.718484102 |
| g Tidjanibacter   | g Mycosphaerella               | 0.009977417  | 0.787695299 | 0.925277255 |
| g Tidjanibacter   | g Simplicillium                | -0.038363019 | 0.300282542 | 0.667386268 |
| g Tidjanibacter   | g unclassified Cordycipitaceae | 0.05411942   | 0.143797467 | 0.538689764 |
| g Tidjanibacter   | g unidentified                 | 0.018120612  | 0.624750418 | 0.8570016   |
| g MGYG-HGUT-04172 | g Verticillium                 | 0.07966209   | 0.031274511 | 0.319842959 |
| g MGYG-HGUT-04172 | g unclassified Tremellomycetes | -0.042878822 | 0.246919628 | 0.629733759 |
| g MGYG-HGUT-04172 | g Candida                      | -0.013013457 | 0.725394988 | 0.906873118 |
| g MGYG-HGUT-04172 | g Cladosporium                 | 0.014800052  | 0.689534942 | 0.891576094 |
| g MGYG-HGUT-04172 | g Debaryomyces                 | -0.108438435 | 0.003330169 | 0.112948224 |
| g MGYG-HGUT-04172 | g Aspergillus                  | 0.033074251  | 0.371887757 | 0.717884076 |
| g MGYG-HGUT-04172 | g Kazachstania                 | 0.022298913  | 0.547214707 | 0.816368923 |
| g MGYG-HGUT-04172 | g Malassezia                   | 0.056996116  | 0.123653201 | 0.508632924 |
| g MGYG-HGUT-04172 | g unclassified Fungi           | 0.066573821  | 0.072038798 | 0.442158914 |
| g MGYG-HGUT-04172 | g Mycosphaerella               | 0.031079061  | 0.401441459 | 0.735790931 |
| g MGYG-HGUT-04172 | g Simplicillium                | -0.053494142 | 0.148491241 | 0.544702547 |
| g MGYG-HGUT-04172 | g unclassified Cordycipitaceae | 0.061019976  | 0.099247889 | 0.478320958 |
| g MGYG-HGUT-04172 | g unidentified                 | -0.011057532 | 0.765352    | 0.916097697 |
| g MGYG-HGUT-03993 | g Verticillium                 | 0.062438627  | 0.091620448 | 0.470392034 |
| g MGYG-HGUT-03993 | g unclassified Tremellomycetes | 0.001034427  | 0.977725981 | 0.991604689 |
| g MGYG-HGUT-03993 | g Candida                      | -0.008898925 | 0.810180361 | 0.933608688 |
| g MGYG-HGUT-03993 | g Cladosporium                 | -0.019344545 | 0.601550246 | 0.847503689 |
| g MGYG-HGUT-03993 | g Debaryomyces                 | -0.038315211 | 0.300885706 | 0.667386268 |
| g MGYG-HGUT-03993 | g Aspergillus                  | 0.020820164  | 0.574107442 | 0.834664141 |
| g MGYG-HGUT-03993 | g Kazachstania                 | 0.03696474   | 0.318256624 | 0.676223819 |
| g MGYG-HGUT-03993 | g Malassezia                   | 0.058288291  | 0.115352694 | 0.498170056 |
| g MGYG-HGUT-03993 | g unclassified Fungi           | 0.017585424  | 0.635014817 | 0.862387935 |
| g MGYG-HGUT-03993 | g Mycosphaerella               | 0.071307529  | 0.053967571 | 0.397628223 |
| g MGYG-HGUT-03993 | g Simplicillium                | -0.04610876  | 0.213068542 | 0.600680647 |
| g MGYG-HGUT-03993 | g unclassified Cordycipitaceae | 0.068432375  | 0.064427673 | 0.423004068 |
| g MGYG-HGUT-03993 | g unidentified                 | 0.039600018  | 0.284955537 | 0.658096791 |
| g MGYG-HGUT-00462 | g Verticillium                 | 0.124894909  | 0.000713688 | 0.048724197 |
| g MGYG-HGUT-00462 | g unclassified Tremellomycetes | -0.013646039 | 0.712624291 | 0.902091837 |
| g MGYG-HGUT-00462 | g Candida                      | 0.031732104  | 0.391616898 | 0.730055982 |
| g MGYG-HGUT-00462 | g Cladosporium                 | 0.030505797  | 0.41018633  | 0.741347865 |
| g MGYG-HGUT-00462 | g Debaryomyces                 | -0.072208872 | 0.050995327 | 0.387110869 |
| g MGYG-HGUT-00462 | g Aspergillus                  | 0.007228951  | 0.845301121 | 0.947820248 |
| g MGYG-HGUT-00462 | g Kazachstania                 | 0.020887146  | 0.572875907 | 0.833746781 |

|                   |                                |              |             |             |
|-------------------|--------------------------------|--------------|-------------|-------------|
| g MGYG-HGUT-00462 | g Malassezia                   | 0.047315332  | 0.201322898 | 0.590022167 |
| g MGYG-HGUT-00462 | g unclassified Fungi           | 0.103500517  | 0.005093161 | 0.138908586 |
| g MGYG-HGUT-00462 | g Mycosphaerella               | 0.031714887  | 0.391874035 | 0.730055982 |
| g MGYG-HGUT-00462 | g Simplicillium                | -0.026467176 | 0.474921836 | 0.776517749 |
| g MGYG-HGUT-00462 | g unclassified Cordycipitaceae | 0.115863328  | 0.001702148 | 0.081135705 |
| g MGYG-HGUT-00462 | g unidentified                 | -0.019421552 | 0.600103588 | 0.847048625 |
| g Rikenella       | g Verticillium                 | 0.05566404   | 0.132689635 | 0.52120331  |
| g Rikenella       | g unclassified Tremellomycetes | -0.011878757 | 0.748492479 | 0.910244784 |
| g Rikenella       | g Candida                      | -0.016179461 | 0.662311339 | 0.877059015 |
| g Rikenella       | g Cladosporium                 | 0.018153242  | 0.624126927 | 0.8570016   |
| g Rikenella       | g Debaryomyces                 | -0.092394761 | 0.012449131 | 0.21883174  |
| g Rikenella       | g Aspergillus                  | 0.011944115  | 0.747155711 | 0.90996433  |
| g Rikenella       | g Kazachstania                 | -0.026085081 | 0.481323478 | 0.780189053 |
| g Rikenella       | g Malassezia                   | 0.042096743  | 0.255652733 | 0.635647844 |
| g Rikenella       | g unclassified Fungi           | 0.029445534  | 0.426654687 | 0.749727648 |
| g Rikenella       | g Mycosphaerella               | -0.035270022 | 0.340964949 | 0.694699556 |
| g Rikenella       | g Simplicillium                | -0.065584132 | 0.07638251  | 0.446713721 |
| g Rikenella       | g unclassified Cordycipitaceae | 0.084208212  | 0.022792954 | 0.283425423 |
| g Rikenella       | g unidentified                 | -0.01217645  | 0.742409958 | 0.909574751 |
| g Parabacteroides | g Verticillium                 | 0.044151202  | 0.233161224 | 0.617638717 |
| g Parabacteroides | g unclassified Tremellomycetes | -0.063175812 | 0.087846709 | 0.465495179 |
| g Parabacteroides | g Candida                      | -0.022512315 | 0.54338572  | 0.816215242 |
| g Parabacteroides | g Cladosporium                 | 0.003308473  | 0.928844782 | 0.974673427 |
| g Parabacteroides | g Debaryomyces                 | 0.002619157  | 0.94364201  | 0.979558539 |
| g Parabacteroides | g Aspergillus                  | 0.012513629  | 0.73554001  | 0.90737623  |
| g Parabacteroides | g Kazachstania                 | -0.016186969 | 0.662164344 | 0.877059015 |
| g Parabacteroides | g Malassezia                   | 0.059813979  | 0.106122284 | 0.486808137 |
| g Parabacteroides | g unclassified Fungi           | -0.055192743 | 0.136006239 | 0.526607397 |
| g Parabacteroides | g Mycosphaerella               | 0.003865254  | 0.916910266 | 0.971437239 |
| g Parabacteroides | g Simplicillium                | -0.048939875 | 0.186262869 | 0.577169451 |
| g Parabacteroides | g unclassified Cordycipitaceae | 0.071471629  | 0.053415941 | 0.396386737 |
| g Parabacteroides | g unidentified                 | -0.009451009 | 0.798649376 | 0.929569806 |
| g UBA7173         | g Verticillium                 | 0.085375907  | 0.020967155 | 0.277879145 |
| g UBA7173         | g unclassified Tremellomycetes | -0.029595686 | 0.424299361 | 0.747983848 |
| g UBA7173         | g Candida                      | 0.032132551  | 0.385665146 | 0.725854015 |
| g UBA7173         | g Cladosporium                 | 0.050841615  | 0.169708503 | 0.564474357 |
| g UBA7173         | g Debaryomyces                 | -0.075431342 | 0.041464671 | 0.35586306  |
| g UBA7173         | g Aspergillus                  | 0.040854361  | 0.269961975 | 0.647933232 |
| g UBA7173         | g Kazachstania                 | 0.012917844  | 0.727332006 | 0.907012052 |
| g UBA7173         | g Malassezia                   | 0.067054419  | 0.070003481 | 0.439536772 |
| g UBA7173         | g unclassified Fungi           | 0.03497769   | 0.344984284 | 0.696679266 |
| g UBA7173         | g Mycosphaerella               | 0.025218049  | 0.496022012 | 0.788597496 |
| g UBA7173         | g Simplicillium                | -0.030004838 | 0.417919919 | 0.74476736  |
| g UBA7173         | g unclassified Cordycipitaceae | 0.129571673  | 0.000444663 | 0.038569025 |
| g UBA7173         | g unidentified                 | -0.029333313 | 0.428419971 | 0.751274884 |
| g CAG-1031        | g Verticillium                 | 0.04767198   | 0.197943005 | 0.58591995  |
| g CAG-1031        | g unclassified Tremellomycetes | -0.018132587 | 0.624521572 | 0.8570016   |
| g CAG-1031        | g Candida                      | -0.001651186 | 0.964452628 | 0.987215874 |
| g CAG-1031        | g Cladosporium                 | 0.027238554  | 0.462141441 | 0.769075712 |
| g CAG-1031        | g Debaryomyces                 | -0.035299296 | 0.340564108 | 0.694699556 |
| g CAG-1031        | g Aspergillus                  | -0.029309089 | 0.428801595 | 0.751274884 |
| g CAG-1031        | g Kazachstania                 | -0.022528233 | 0.54310066  | 0.816215242 |
| g CAG-1031        | g Malassezia                   | 0.097890634  | 0.008084882 | 0.172488343 |
| g CAG-1031        | g unclassified Fungi           | -0.0397675   | 0.282921691 | 0.657890287 |
| g CAG-1031        | g Mycosphaerella               | -0.004479298 | 0.903770086 | 0.967299994 |
| g CAG-1031        | g Simplicillium                | -0.052472415 | 0.156411053 | 0.535359117 |
| g CAG-1031        | g unclassified Cordycipitaceae | 0.032404773  | 0.381650826 | 0.723098466 |
| g CAG-1031        | g unidentified                 | -0.00690328  | 0.852188444 | 0.949400054 |
| g CAG-485         | g Verticillium                 | 0.10838587   | 0.003345565 | 0.113107904 |
| g CAG-485         | g unclassified Tremellomycetes | -0.0569958   | 0.123655289 | 0.508632924 |
| g CAG-485         | g Candida                      | -0.037414986 | 0.312393747 | 0.672824117 |
| g CAG-485         | g Cladosporium                 | 0.013530215  | 0.714956702 | 0.902925307 |
| g CAG-485         | g Debaryomyces                 | -0.085471174 | 0.020823969 | 0.277662496 |
| g CAG-485         | g Aspergillus                  | 0.034611311  | 0.350064103 | 0.702251818 |
| g CAG-485         | g Kazachstania                 | -0.036983276 | 0.318013856 | 0.676223819 |
| g CAG-485         | g Malassezia                   | 0.04614308   | 0.212727773 | 0.600680647 |
| g CAG-485         | g unclassified Fungi           | 0.01559432   | 0.673807761 | 0.882782435 |
| g CAG-485         | g Mycosphaerella               | 0.049152258  | 0.184357107 | 0.576327002 |
| g CAG-485         | g Simplicillium                | -0.041007515 | 0.268168972 | 0.645333158 |
| g CAG-485         | g unclassified Cordycipitaceae | 0.091991794  | 0.012838986 | 0.221076037 |
| g CAG-485         | g unidentified                 | 0.022199375  | 0.549005217 | 0.817789021 |
| g CAG-873         | g Verticillium                 | 0.059436295  | 0.108350963 | 0.490260184 |
| g CAG-873         | g unclassified Tremellomycetes | 0.037381821  | 0.312823158 | 0.672824117 |
| g CAG-873         | g Candida                      | 0.041181372  | 0.266143506 | 0.644465474 |
| g CAG-873         | g Cladosporium                 | 0.024810162  | 0.503018582 | 0.794231967 |
| g CAG-873         | g Debaryomyces                 | -0.068345966 | 0.064766227 | 0.423806055 |
| g CAG-873         | g Aspergillus                  | 0.047667879  | 0.197981628 | 0.58591995  |
| g CAG-873         | g Kazachstania                 | -0.069517183 | 0.060300022 | 0.412830947 |

|                   |                                |              |             |             |
|-------------------|--------------------------------|--------------|-------------|-------------|
| g CAG-873         | g Malassezia                   | 0.01644757   | 0.657069955 | 0.87431013  |
| g CAG-873         | g unclassified Fungi           | 0.027542419  | 0.457160022 | 0.766960938 |
| g CAG-873         | g Mycosphaerella               | 0.004421402  | 0.905007977 | 0.967495419 |
| g CAG-873         | g Simplicillium                | 0.037922357  | 0.305872643 | 0.670411001 |
| g CAG-873         | g unclassified Cordycipitaceae | 0.052384979  | 0.157103383 | 0.554156001 |
| g CAG-873         | g unidentified                 | -0.005336913 | 0.885462363 | 0.96210924  |
| g CAG-279         | g Verticillium                 | 0.014728207  | 0.690964272 | 0.892660716 |
| g CAG-279         | g unclassified Tremellomycetes | -0.039207037 | 0.289766455 | 0.660061436 |
| g CAG-279         | g Candida                      | 0.057970791  | 0.117350537 | 0.50187237  |
| g CAG-279         | g Cladosporium                 | -0.028530629 | 0.441169603 | 0.75910048  |
| g CAG-279         | g Debaryomyces                 | 0.014692101  | 0.691683022 | 0.893134834 |
| g CAG-279         | g Aspergillus                  | 0.067641871  | 0.067579859 | 0.433938151 |
| g CAG-279         | g Kazachstania                 | -0.040727486 | 0.271453536 | 0.649109772 |
| g CAG-279         | g Malassezia                   | 0.001189407  | 0.974389923 | 0.990490577 |
| g CAG-279         | g unclassified Fungi           | 0.052412666  | 0.1568839   | 0.554071089 |
| g CAG-279         | g Mycosphaerella               | 0.04445643   | 0.229943031 | 0.615080169 |
| g CAG-279         | g Simplicillium                | 0.032234834  | 0.384153824 | 0.725207645 |
| g CAG-279         | g unclassified Cordycipitaceae | -0.022088415 | 0.551004583 | 0.819498313 |
| g CAG-279         | g unidentified                 | -0.026423032 | 0.475659028 | 0.777242716 |
| g Muribaculum     | g Verticillium                 | 0.023715232  | 0.522054446 | 0.805467412 |
| g Muribaculum     | g unclassified Tremellomycetes | -0.039988372 | 0.280254524 | 0.657094722 |
| g Muribaculum     | g Candida                      | -0.017150533 | 0.643407609 | 0.866777762 |
| g Muribaculum     | g Cladosporium                 | 0.00733619   | 0.84303577  | 0.946626116 |
| g Muribaculum     | g Debaryomyces                 | -0.016201493 | 0.661879999 | 0.877036582 |
| g Muribaculum     | g Aspergillus                  | 0.035611395  | 0.336309385 | 0.691436935 |
| g Muribaculum     | g Kazachstania                 | -0.056696247 | 0.125644424 | 0.511963534 |
| g Muribaculum     | g Malassezia                   | 0.0300993    | 0.416455137 | 0.744162152 |
| g Muribaculum     | g unclassified Fungi           | 0.072018933  | 0.051610022 | 0.388986645 |
| g Muribaculum     | g Mycosphaerella               | 0.065438115  | 0.077041059 | 0.448667857 |
| g Muribaculum     | g Simplicillium                | -0.017444026 | 0.637738537 | 0.863812758 |
| g Muribaculum     | g unclassified Cordycipitaceae | 0.05251283   | 0.156091822 | 0.553354661 |
| g Muribaculum     | g unidentified                 | 0.020464651  | 0.580664753 | 0.83770885  |
| g Duncaniella     | g Verticillium                 | 0.057074077  | 0.123139566 | 0.508016722 |
| g Duncaniella     | g unclassified Tremellomycetes | -0.059347727 | 0.10887891  | 0.491744185 |
| g Duncaniella     | g Candida                      | -0.056399005 | 0.127642719 | 0.51521926  |
| g Duncaniella     | g Cladosporium                 | -0.003334272 | 0.928291407 | 0.974599406 |
| g Duncaniella     | g Debaryomyces                 | -0.101436189 | 0.006052547 | 0.148686802 |
| g Duncaniella     | g Aspergillus                  | 0.05001607   | 0.176754263 | 0.572449989 |
| g Duncaniella     | g Kazachstania                 | -0.013756474 | 0.710402923 | 0.902091837 |
| g Duncaniella     | g Malassezia                   | 0.029210699  | 0.430353587 | 0.753100985 |
| g Duncaniella     | g unclassified Fungi           | 0.068698709  | 0.06339332  | 0.421138313 |
| g Duncaniella     | g Mycosphaerella               | 0.020633888  | 0.577538869 | 0.836262521 |
| g Duncaniella     | g Simplicillium                | -0.085008813 | 0.021526927 | 0.279850054 |
| g Duncaniella     | g unclassified Cordycipitaceae | 0.070581654  | 0.056464856 | 0.404484002 |
| g Duncaniella     | g unidentified                 | 0.029689216  | 0.42283607  | 0.746980426 |
| g Paramuribaculum | g Verticillium                 | 0.000773939  | 0.98333404  | 0.99347344  |
| g Paramuribaculum | g unclassified Tremellomycetes | -0.048562437 | 0.189685493 | 0.579795461 |
| g Paramuribaculum | g Candida                      | 0.015921967  | 0.667368089 | 0.879421986 |
| g Paramuribaculum | g Cladosporium                 | -0.055628026 | 0.132940846 | 0.521431795 |
| g Paramuribaculum | g Debaryomyces                 | -0.036851857 | 0.319737746 | 0.677234677 |
| g Paramuribaculum | g Aspergillus                  | 0.050322102  | 0.174117426 | 0.569281535 |
| g Paramuribaculum | g Kazachstania                 | -0.039653071 | 0.284310212 | 0.658002559 |
| g Paramuribaculum | g Malassezia                   | 0.028231059  | 0.445982929 | 0.761832544 |
| g Paramuribaculum | g unclassified Fungi           | 0.030342296  | 0.412701013 | 0.74272145  |
| g Paramuribaculum | g Mycosphaerella               | 0.032774401  | 0.376241237 | 0.720221558 |
| g Paramuribaculum | g Simplicillium                | -0.078772239 | 0.033218627 | 0.326769053 |
| g Paramuribaculum | g unclassified Cordycipitaceae | -0.005095828 | 0.890603126 | 0.962946999 |
| g Paramuribaculum | g unidentified                 | 0.012380415  | 0.73825173  | 0.907794719 |
| g K10             | g Verticillium                 | 0.071398263  | 0.053661981 | 0.397098662 |
| g K10             | g unclassified Tremellomycetes | -0.045969884 | 0.214451515 | 0.601936086 |
| g K10             | g Candida                      | 0.014088674  | 0.703735618 | 0.898194465 |
| g K10             | g Cladosporium                 | -0.047861614 | 0.196162835 | 0.585259221 |
| g K10             | g Debaryomyces                 | -0.025973869 | 0.483195499 | 0.780449413 |
| g K10             | g Aspergillus                  | 0.034328791  | 0.354013388 | 0.705388488 |
| g K10             | g Kazachstania                 | -0.073443288 | 0.0471478   | 0.376541905 |
| g K10             | g Malassezia                   | -0.003317539 | 0.92865031  | 0.974673427 |
| g K10             | g unclassified Fungi           | 0.032395963  | 0.381780346 | 0.723098466 |
| g K10             | g Mycosphaerella               | 0.087985887  | 0.017339886 | 0.256989733 |
| g K10             | g Simplicillium                | -0.020542466 | 0.5792265   | 0.836772676 |
| g K10             | g unclassified Cordycipitaceae | 0.033084285  | 0.371742618 | 0.717884076 |
| g K10             | g unidentified                 | 0.016008772  | 0.665656871 | 0.879421986 |
| g UBA7173 A       | g Verticillium                 | 0.034973087  | 0.34504782  | 0.696679266 |
| g UBA7173 A       | g unclassified Tremellomycetes | -0.066658165 | 0.071678142 | 0.442098997 |
| g UBA7173 A       | g Candida                      | -0.037601641 | 0.309984166 | 0.672249972 |
| g UBA7173 A       | g Cladosporium                 | 0.020625883  | 0.577686546 | 0.836262521 |
| g UBA7173 A       | g Debaryomyces                 | -0.091627086 | 0.013201079 | 0.222446588 |
| g UBA7173 A       | g Aspergillus                  | 0.021774136  | 0.556686824 | 0.823205698 |
| g UBA7173 A       | g Kazachstania                 | -0.031875354 | 0.389481445 | 0.729338638 |



|                   |                                |              |             |             |
|-------------------|--------------------------------|--------------|-------------|-------------|
| g UBA7173 A       | g Malassezia                   | 0.025287774  | 0.494831224 | 0.787688967 |
| g UBA7173 A       | g unclassified Fungi           | 0.038189614  | 0.302474136 | 0.668709704 |
| g UBA7173 A       | g Mycosphaerella               | 0.020400326  | 0.581854941 | 0.838368792 |
| g UBA7173 A       | g Simplicillium                | 0.012095903  | 0.744054144 | 0.909574751 |
| g UBA7173 A       | g unclassified Cordycipitaceae | 0.032046522  | 0.386939105 | 0.727151413 |
| g UBA7173 A       | g unidentified                 | 0.062066534  | 0.09357402  | 0.472649296 |
| g UBA3263         | g Verticillium                 | 0.085155058  | 0.021302385 | 0.278255687 |
| g UBA3263         | g unclassified Tremellomycetes | -0.052255189 | 0.158135339 | 0.554768804 |
| g UBA3263         | g Candida                      | -0.006201361 | 0.867070315 | 0.955196913 |
| g UBA3263         | g Cladosporium                 | -0.00078591  | 0.983076299 | 0.993395456 |
| g UBA3263         | g Debaryomyces                 | -0.050758787 | 0.170405782 | 0.564916697 |
| g UBA3263         | g Aspergillus                  | 0.073614012  | 0.046635367 | 0.375045907 |
| g UBA3263         | g Kazachstania                 | -0.008698922 | 0.814367998 | 0.934766567 |
| g UBA3263         | g Malassezia                   | -0.014916773 | 0.687215157 | 0.890576153 |
| g UBA3263         | g unclassified Fungi           | 0.06097869   | 0.099477216 | 0.478320958 |
| g UBA3263         | g Mycosphaerella               | 0.037125226  | 0.316158658 | 0.675194937 |
| g UBA3263         | g Simplicillium                | -0.002249424 | 0.951587218 | 0.982634054 |
| g UBA3263         | g unclassified Cordycipitaceae | 0.076883722  | 0.03768859  | 0.342509087 |
| g UBA3263         | g unidentified                 | 0.018479571  | 0.617906246 | 0.855065241 |
| g MGYG-HGUT-03270 | g Verticillium                 | -0.004994068 | 0.892774406 | 0.964058217 |
| g MGYG-HGUT-03270 | g unclassified Tremellomycetes | -0.066130854 | 0.073957339 | 0.444193078 |
| g MGYG-HGUT-03270 | g Candida                      | 0.043549792  | 0.239595198 | 0.63263007  |
| g MGYG-HGUT-03270 | g Cladosporium                 | -0.051237397 | 0.166406101 | 0.562541523 |
| g MGYG-HGUT-03270 | g Debaryomyces                 | 0.01703302   | 0.645683328 | 0.868076943 |
| g MGYG-HGUT-03270 | g Aspergillus                  | 0.077187041  | 0.036937971 | 0.340172772 |
| g MGYG-HGUT-03270 | g Kazachstania                 | -0.021941692 | 0.553653825 | 0.8206689   |
| g MGYG-HGUT-03270 | g Malassezia                   | 0.007719494  | 0.834949465 | 0.942615976 |
| g MGYG-HGUT-03270 | g unclassified Fungi           | 0.080796451  | 0.028938135 | 0.31117391  |
| g MGYG-HGUT-03270 | g Mycosphaerella               | -0.017966009 | 0.62770823  | 0.859238199 |
| g MGYG-HGUT-03270 | g Simplicillium                | 0.064881454  | 0.07959411  | 0.45101344  |
| g MGYG-HGUT-03270 | g unclassified Cordycipitaceae | -0.02631924  | 0.477394813 | 0.779116581 |
| g MGYG-HGUT-03270 | g unidentified                 | 0.041399265  | 0.263619885 | 0.641845793 |
| g MGYG-HGUT-02176 | g Verticillium                 | -0.038184592 | 0.302537766 | 0.668709704 |
| g MGYG-HGUT-02176 | g unclassified Tremellomycetes | -0.04329624  | 0.242344847 | 0.626487849 |
| g MGYG-HGUT-02176 | g Candida                      | 0.019473847  | 0.59912208  | 0.846523771 |
| g MGYG-HGUT-02176 | g Cladosporium                 | -0.096836055 | 0.008797199 | 0.180264028 |
| g MGYG-HGUT-02176 | g Debaryomyces                 | 0.014173242  | 0.702041925 | 0.897212331 |
| g MGYG-HGUT-02176 | g Aspergillus                  | 0.063619139  | 0.085638177 | 0.460947707 |
| g MGYG-HGUT-02176 | g Kazachstania                 | -0.09936206  | 0.007177136 | 0.162283008 |
| g MGYG-HGUT-02176 | g Malassezia                   | -0.038034968 | 0.304437587 | 0.670057703 |
| g MGYG-HGUT-02176 | g unclassified Fungi           | 0.048119645  | 0.19375943  | 0.582802008 |
| g MGYG-HGUT-02176 | g Mycosphaerella               | 0.008210976  | 0.82460655  | 0.939308882 |
| g MGYG-HGUT-02176 | g Simplicillium                | 0.019311108  | 0.602178866 | 0.84782554  |
| g MGYG-HGUT-02176 | g unclassified Cordycipitaceae | -0.103175446 | 0.005234502 | 0.140587559 |
| g MGYG-HGUT-02176 | g unidentified                 | 0.064138568  | 0.083107736 | 0.455435557 |
| g C941            | g Verticillium                 | 0.013645563  | 0.712633874 | 0.902091837 |
| g C941            | g unclassified Tremellomycetes | -0.0824465   | 0.025808036 | 0.299124466 |
| g C941            | g Candida                      | 0.041938719  | 0.257443013 | 0.637448375 |
| g C941            | g Cladosporium                 | -0.036815528 | 0.320215363 | 0.677486799 |
| g C941            | g Debaryomyces                 | 0.011121529  | 0.764034054 | 0.915477365 |
| g C941            | g Aspergillus                  | 0.026649689  | 0.471880539 | 0.774056714 |
| g C941            | g Kazachstania                 | -0.09726316  | 0.00850223  | 0.176412932 |
| g C941            | g Malassezia                   | -0.015012661 | 0.685311624 | 0.889048376 |
| g C941            | g unclassified Fungi           | 0.046302577  | 0.211149221 | 0.60047865  |
| g C941            | g Mycosphaerella               | 0.028626354  | 0.439637834 | 0.758246834 |
| g C941            | g Simplicillium                | 0.055561106  | 0.133408609 | 0.52185568  |
| g C941            | g unclassified Cordycipitaceae | -0.052983377 | 0.152411315 | 0.549189615 |
| g C941            | g unidentified                 | 0.046886966  | 0.205437747 | 0.594956092 |
| g MGYG-HGUT-01871 | g Verticillium                 | 0.089586861  | 0.015397619 | 0.243190456 |
| g MGYG-HGUT-01871 | g unclassified Tremellomycetes | -0.047108826 | 0.203299027 | 0.593137663 |
| g MGYG-HGUT-01871 | g Candida                      | -0.04284903  | 0.247248434 | 0.629733759 |
| g MGYG-HGUT-01871 | g Cladosporium                 | -0.039170843 | 0.290212269 | 0.660151812 |
| g MGYG-HGUT-01871 | g Debaryomyces                 | -0.016446242 | 0.657095867 | 0.87431013  |
| g MGYG-HGUT-01871 | g Aspergillus                  | -0.01366063  | 0.712330671 | 0.902091837 |
| g MGYG-HGUT-01871 | g Kazachstania                 | 0.054141687  | 0.143632436 | 0.538689764 |
| g MGYG-HGUT-01871 | g Malassezia                   | 0.048976229  | 0.185935632 | 0.577169451 |
| g MGYG-HGUT-01871 | g unclassified Fungi           | -0.010241856 | 0.78220819  | 0.922264854 |
| g MGYG-HGUT-01871 | g Mycosphaerella               | 0.012670284  | 0.732355339 | 0.907315107 |
| g MGYG-HGUT-01871 | g Simplicillium                | -0.008945493 | 0.809206116 | 0.933584001 |
| g MGYG-HGUT-01871 | g unclassified Cordycipitaceae | 0.086178396  | 0.019787369 | 0.270879604 |
| g MGYG-HGUT-01871 | g unidentified                 | -0.063598967 | 0.085737687 | 0.461014332 |
| g MGYG-HGUT-02567 | g Verticillium                 | 0.085666129  | 0.020533605 | 0.275394935 |
| g MGYG-HGUT-02567 | g unclassified Tremellomycetes | -0.034933653 | 0.345592362 | 0.697400798 |
| g MGYG-HGUT-02567 | g Candida                      | -0.024715597 | 0.504648069 | 0.795181561 |
| g MGYG-HGUT-02567 | g Cladosporium                 | -0.034395044 | 0.353084734 | 0.704818603 |
| g MGYG-HGUT-02567 | g Debaryomyces                 | -0.046941546 | 0.204910092 | 0.594296482 |
| g MGYG-HGUT-02567 | g Aspergillus                  | 0.003421235  | 0.926426375 | 0.974172444 |
| g MGYG-HGUT-02567 | g Kazachstania                 | 0.008998796  | 0.808091311 | 0.933437643 |

|                   |                                |              |             |             |
|-------------------|--------------------------------|--------------|-------------|-------------|
| g MGYG-HGUT-02567 | g Malassezia                   | 0.097973186  | 0.00803136  | 0.172334585 |
| g MGYG-HGUT-02567 | g unclassified Fungi           | 0.00842913   | 0.820025241 | 0.937500767 |
| g MGYG-HGUT-02567 | g Mycosphaerella               | 0.037694739  | 0.308786937 | 0.671651258 |
| g MGYG-HGUT-02567 | g Simplicillium                | 0.006506625  | 0.860592099 | 0.953015155 |
| g MGYG-HGUT-02567 | g unclassified Cordycipitaceae | 0.074217945  | 0.044860029 | 0.367991339 |
| g MGYG-HGUT-02567 | g unidentified                 | 0.058737088  | 0.112574329 | 0.495487035 |
| g MGYG-HGUT-00824 | g Verticillium                 | 0.046424159  | 0.209951606 | 0.598807697 |
| g MGYG-HGUT-00824 | g unclassified Tremellomycetes | -0.002919915 | 0.937183086 | 0.977568509 |
| g MGYG-HGUT-00824 | g Candida                      | -0.001489442 | 0.967932739 | 0.988549475 |
| g MGYG-HGUT-00824 | g Cladosporium                 | -0.001167207 | 0.97486777  | 0.990490577 |
| g MGYG-HGUT-00824 | g Debaryomyces                 | -0.114637961 | 0.00190663  | 0.084840998 |
| g MGYG-HGUT-00824 | g Aspergillus                  | -0.011625342 | 0.753682647 | 0.911378102 |
| g MGYG-HGUT-00824 | g Kazachstania                 | 0.009845168  | 0.790443436 | 0.926417823 |
| g MGYG-HGUT-00824 | g Malassezia                   | 0.009936945  | 0.788536025 | 0.925497806 |
| g MGYG-HGUT-00824 | g unclassified Fungi           | 0.034442455  | 0.35242113  | 0.704575929 |
| g MGYG-HGUT-00824 | g Mycosphaerella               | 0.053752018  | 0.146541485 | 0.541068386 |
| g MGYG-HGUT-00824 | g Simplicillium                | -0.008982671 | 0.808428508 | 0.933453782 |
| g MGYG-HGUT-00824 | g unclassified Cordycipitaceae | 0.045876894  | 0.215381132 | 0.603186168 |
| g MGYG-HGUT-00824 | g unidentified                 | -0.002217701 | 0.952269158 | 0.982634054 |
| g MGYG-HGUT-03204 | g Verticillium                 | 0.050221727  | 0.174979025 | 0.570082525 |
| g MGYG-HGUT-03204 | g unclassified Tremellomycetes | -0.030143907 | 0.415764485 | 0.743933003 |
| g MGYG-HGUT-03204 | g Candida                      | -0.044461756 | 0.229887163 | 0.615080169 |
| g MGYG-HGUT-03204 | g Cladosporium                 | 0.025610626  | 0.489337311 | 0.784451965 |
| g MGYG-HGUT-03204 | g Debaryomyces                 | -0.006471477 | 0.861337537 | 0.953015155 |
| g MGYG-HGUT-03204 | g Aspergillus                  | -0.025559649 | 0.4902026   | 0.785111149 |
| g MGYG-HGUT-03204 | g Kazachstania                 | -0.025315682 | 0.494355017 | 0.787688967 |
| g MGYG-HGUT-03204 | g Malassezia                   | 0.031243236  | 0.398957782 | 0.734026611 |
| g MGYG-HGUT-03204 | g unclassified Fungi           | 0.002308323  | 0.950321191 | 0.982348232 |
| g MGYG-HGUT-03204 | g Mycosphaerella               | 0.032350269  | 0.382452519 | 0.723473821 |
| g MGYG-HGUT-03204 | g Simplicillium                | -0.010057456 | 0.786033372 | 0.924326588 |
| g MGYG-HGUT-03204 | g unclassified Cordycipitaceae | 0.069516414  | 0.060302869 | 0.412830947 |
| g MGYG-HGUT-03204 | g unidentified                 | 0.030871043  | 0.404601685 | 0.737438672 |
| g MGYG-HGUT-03533 | g Verticillium                 | 0.071876905  | 0.052073696 | 0.391511425 |
| g MGYG-HGUT-03533 | g unclassified Tremellomycetes | -0.04652696  | 0.208942832 | 0.598168571 |
| g MGYG-HGUT-03533 | g Candida                      | 0.028813064  | 0.436658924 | 0.755981115 |
| g MGYG-HGUT-03533 | g Cladosporium                 | -0.041756024 | 0.259523591 | 0.638372534 |
| g MGYG-HGUT-03533 | g Debaryomyces                 | -0.022838294 | 0.537562638 | 0.813920136 |
| g MGYG-HGUT-03533 | g Aspergillus                  | 0.019586561  | 0.597009031 | 0.845758921 |
| g MGYG-HGUT-03533 | g Kazachstania                 | -0.025462048 | 0.491861565 | 0.785854011 |
| g MGYG-HGUT-03533 | g Malassezia                   | 0.051577692  | 0.163605429 | 0.56154503  |
| g MGYG-HGUT-03533 | g unclassified Fungi           | 0.094160951  | 0.010861135 | 0.201636018 |
| g MGYG-HGUT-03533 | g Mycosphaerella               | 0.017941813  | 0.628171677 | 0.859431211 |
| g MGYG-HGUT-03533 | g Simplicillium                | -0.017394899 | 0.638686011 | 0.86388896  |
| g MGYG-HGUT-03533 | g unclassified Cordycipitaceae | 0.028028237  | 0.44925864  | 0.762723397 |
| g MGYG-HGUT-03533 | g unidentified                 | 0.003187062  | 0.931449411 | 0.976058688 |
| g MGYG-HGUT-03424 | g Verticillium                 | 0.023498122  | 0.52587243  | 0.808232746 |
| g MGYG-HGUT-03424 | g unclassified Tremellomycetes | -0.037779894 | 0.30769452  | 0.670833121 |
| g MGYG-HGUT-03424 | g Candida                      | 0.047834081  | 0.196420569 | 0.585259306 |
| g MGYG-HGUT-03424 | g Cladosporium                 | -0.037091064 | 0.316604487 | 0.675601669 |
| g MGYG-HGUT-03424 | g Debaryomyces                 | 0.043218774  | 0.24318932  | 0.627053943 |
| g MGYG-HGUT-03424 | g Aspergillus                  | 0.036856424  | 0.319677726 | 0.677234677 |
| g MGYG-HGUT-03424 | g Kazachstania                 | -0.070187901 | 0.057859197 | 0.407963088 |
| g MGYG-HGUT-03424 | g Malassezia                   | -0.00305512  | 0.934280809 | 0.976739727 |
| g MGYG-HGUT-03424 | g unclassified Fungi           | 0.040565804  | 0.273362436 | 0.650634569 |
| g MGYG-HGUT-03424 | g Mycosphaerella               | 0.001793152  | 0.961398612 | 0.985901745 |
| g MGYG-HGUT-03424 | g Simplicillium                | 0.055366154  | 0.134778565 | 0.52396281  |
| g MGYG-HGUT-03424 | g unclassified Cordycipitaceae | -0.0447606   | 0.226767485 | 0.612967811 |
| g MGYG-HGUT-03424 | g unidentified                 | 0.032687156  | 0.37751382  | 0.721295105 |
| g Odoribacter     | g Verticillium                 | 0.094429751  | 0.010635904 | 0.19927243  |
| g Odoribacter     | g unclassified Tremellomycetes | -0.114472044 | 0.001935986 | 0.084840998 |
| g Odoribacter     | g Candida                      | -0.068516211 | 0.064100593 | 0.423004068 |
| g Odoribacter     | g Cladosporium                 | 0.017169945  | 0.643032018 | 0.8664924   |
| g Odoribacter     | g Debaryomyces                 | -0.088102862 | 0.01719104  | 0.256580512 |
| g Odoribacter     | g Aspergillus                  | 0.009858918  | 0.790157581 | 0.926373534 |
| g Odoribacter     | g Kazachstania                 | -0.049337107 | 0.182710172 | 0.575260034 |
| g Odoribacter     | g Malassezia                   | 0.052634419  | 0.1551344   | 0.552672864 |
| g Odoribacter     | g unclassified Fungi           | -0.011516647 | 0.75591225  | 0.911989902 |
| g Odoribacter     | g Mycosphaerella               | 0.007220296  | 0.845484014 | 0.947820248 |
| g Odoribacter     | g Simplicillium                | -0.043064373 | 0.244878642 | 0.628403245 |
| g Odoribacter     | g unclassified Cordycipitaceae | 0.073965014  | 0.045596505 | 0.370793362 |
| g Odoribacter     | g unidentified                 | -0.013972698 | 0.706060717 | 0.899751265 |
| g Butyricimonas   | g Verticillium                 | 0.062603374  | 0.090766001 | 0.469307225 |
| g Butyricimonas   | g unclassified Tremellomycetes | -0.099932323 | 0.006850636 | 0.157937767 |
| g Butyricimonas   | g Candida                      | 0.001946677  | 0.958096582 | 0.984847119 |
| g Butyricimonas   | g Cladosporium                 | -0.03747359  | 0.311635882 | 0.672399691 |
| g Butyricimonas   | g Debaryomyces                 | -0.073808385 | 0.046057651 | 0.372901349 |
| g Butyricimonas   | g Aspergillus                  | 0.017274411  | 0.641012261 | 0.86454139  |
| g Butyricimonas   | g Kazachstania                 | -0.037946583 | 0.305563541 | 0.670074578 |

|                 |                                |              |             |             |
|-----------------|--------------------------------|--------------|-------------|-------------|
| g Butyricimonas | g Malassezia                   | 0.065798112  | 0.075425732 | 0.444977361 |
| g Butyricimonas | g unclassified Fungi           | -0.016082765 | 0.66420578  | 0.878587467 |
| g Butyricimonas | g Mycosphaerella               | 0.028271061  | 0.445338482 | 0.76170364  |
| g Butyricimonas | g Simplicillium                | -0.059994543 | 0.105069683 | 0.485522878 |
| g Butyricimonas | g unclassified Cordycipitaceae | 0.105864281  | 0.004164681 | 0.1257322   |
| g Butyricimonas | g unidentified                 | 0.059769922  | 0.106380375 | 0.487112562 |
| g Gabonibacter  | g Verticillium                 | 0.040912316  | 0.269282529 | 0.646742561 |
| g Gabonibacter  | g unclassified Tremellomycetes | -0.063802274 | 0.084739017 | 0.458909046 |
| g Gabonibacter  | g Candida                      | -0.05052621  | 0.172375158 | 0.566309615 |
| g Gabonibacter  | g Cladosporium                 | -0.00139353  | 0.969996702 | 0.98896291  |
| g Gabonibacter  | g Debaryomyces                 | -0.003875058 | 0.916700282 | 0.971437239 |
| g Gabonibacter  | g Aspergillus                  | 0.029725415  | 0.422270528 | 0.746980426 |
| g Gabonibacter  | g Kazachstania                 | -0.043150336 | 0.243937102 | 0.627824375 |
| g Gabonibacter  | g Malassezia                   | 0.087493433  | 0.017978945 | 0.260248809 |
| g Gabonibacter  | g unclassified Fungi           | -0.009714624 | 0.793158701 | 0.927022902 |
| g Gabonibacter  | g Mycosphaerella               | 0.005443475  | 0.883191592 | 0.961021432 |
| g Gabonibacter  | g Simplicillium                | 0.002232886  | 0.951942717 | 0.982634054 |
| g Gabonibacter  | g unclassified Cordycipitaceae | 0.056018813  | 0.130234527 | 0.517804933 |
| g Gabonibacter  | g unidentified                 | 0.018129314  | 0.624584111 | 0.8570016   |
| g Barnesiella   | g Verticillium                 | 0.033243831  | 0.369439508 | 0.71692327  |
| g Barnesiella   | g unclassified Tremellomycetes | -0.052616863 | 0.155272362 | 0.552672864 |
| g Barnesiella   | g Candida                      | -0.030158363 | 0.415540803 | 0.743848203 |
| g Barnesiella   | g Cladosporium                 | 0.007182465  | 0.846283488 | 0.947820248 |
| g Barnesiella   | g Debaryomyces                 | -0.083618587 | 0.023766173 | 0.2874213   |
| g Barnesiella   | g Aspergillus                  | 0.081963989  | 0.026691607 | 0.303120982 |
| g Barnesiella   | g Kazachstania                 | 0.012203345  | 0.741861227 | 0.909480234 |
| g Barnesiella   | g Malassezia                   | 0.034396716  | 0.353061323 | 0.704818603 |
| g Barnesiella   | g unclassified Fungi           | 0.017657947  | 0.633619735 | 0.861635763 |
| g Barnesiella   | g Mycosphaerella               | 0.026582193  | 0.473004002 | 0.775069559 |
| g Barnesiella   | g Simplicillium                | -0.028038218 | 0.449097113 | 0.762723397 |
| g Barnesiella   | g unclassified Cordycipitaceae | 0.059426148  | 0.108411343 | 0.490260184 |
| g Barnesiella   | g unidentified                 | 0.070150899  | 0.057991683 | 0.407963088 |
| g Coprobacter   | g Verticillium                 | 0.055996396  | 0.130388606 | 0.517804933 |
| g Coprobacter   | g unclassified Tremellomycetes | -0.034283655 | 0.354646919 | 0.70583652  |
| g Coprobacter   | g Candida                      | -0.029338512 | 0.428338097 | 0.751274884 |
| g Coprobacter   | g Cladosporium                 | 0.019357153  | 0.60131328  | 0.847503689 |
| g Coprobacter   | g Debaryomyces                 | 0.026176241  | 0.479791922 | 0.780189053 |
| g Coprobacter   | g Aspergillus                  | -0.080574184 | 0.029387335 | 0.312580107 |
| g Coprobacter   | g Kazachstania                 | 0.031090971  | 0.401260974 | 0.735790931 |
| g Coprobacter   | g Malassezia                   | 0.025141535  | 0.497330523 | 0.789550533 |
| g Coprobacter   | g unclassified Fungi           | -0.012451892 | 0.736796325 | 0.907763268 |
| g Coprobacter   | g Mycosphaerella               | -0.000164467 | 0.996458134 | 0.998534088 |
| g Coprobacter   | g Simplicillium                | -0.028589844 | 0.440221711 | 0.758246834 |
| g Coprobacter   | g unclassified Cordycipitaceae | 0.08084121   | 0.028849107 | 0.31117391  |
| g Coprobacter   | g unidentified                 | -0.048819066 | 0.18735338  | 0.577661122 |
| g RC9           | g Verticillium                 | 0.037884158  | 0.30636045  | 0.670552593 |
| g RC9           | g unclassified Tremellomycetes | -0.073526398 | 0.046897756 | 0.375701373 |
| g RC9           | g Candida                      | 0.046974607  | 0.204590951 | 0.594053722 |
| g RC9           | g Cladosporium                 | -0.0371378   | 0.315994669 | 0.675194937 |
| g RC9           | g Debaryomyces                 | 0.017421571  | 0.638171533 | 0.86388896  |
| g RC9           | g Aspergillus                  | 0.056065099  | 0.129916827 | 0.517527876 |
| g RC9           | g Kazachstania                 | -0.084347294 | 0.02256849  | 0.283321191 |
| g RC9           | g Malassezia                   | 0.012900437  | 0.727684827 | 0.907012052 |
| g RC9           | g unclassified Fungi           | 0.019389737  | 0.600701071 | 0.847052968 |
| g RC9           | g Mycosphaerella               | 0.013520527  | 0.715151915 | 0.902925307 |
| g RC9           | g Simplicillium                | 0.035603106  | 0.336421939 | 0.691502927 |
| g RC9           | g unclassified Cordycipitaceae | 0.004291222  | 0.907792193 | 0.968833132 |
| g RC9           | g unidentified                 | -0.016836776 | 0.649491079 | 0.870052588 |
| g CAG-831       | g Verticillium                 | 0.088049629  | 0.017258638 | 0.256989733 |
| g CAG-831       | g unclassified Tremellomycetes | -0.106881002 | 0.003814737 | 0.121638936 |
| g CAG-831       | g Candida                      | -0.038145633 | 0.303031679 | 0.668894707 |
| g CAG-831       | g Cladosporium                 | -0.037038987 | 0.317284898 | 0.675963115 |
| g CAG-831       | g Debaryomyces                 | -0.070196994 | 0.057826677 | 0.407963088 |
| g CAG-831       | g Aspergillus                  | 0.017303346  | 0.640453281 | 0.864117891 |
| g CAG-831       | g Kazachstania                 | -0.0744952   | 0.044064254 | 0.365142621 |
| g CAG-831       | g Malassezia                   | 0.044442706  | 0.230087054 | 0.615133665 |
| g CAG-831       | g unclassified Fungi           | 0.017109093  | 0.644209745 | 0.86719597  |
| g CAG-831       | g Mycosphaerella               | 0.044905496  | 0.225265793 | 0.612119514 |
| g CAG-831       | g Simplicillium                | -0.03639325  | 0.325801214 | 0.682100836 |
| g CAG-831       | g unclassified Cordycipitaceae | 0.103843921  | 0.004947597 | 0.138141091 |
| g CAG-831       | g unidentified                 | 0.04863654   | 0.189009901 | 0.57923625  |
| g UBA1232       | g Verticillium                 | 0.032599317  | 0.378797716 | 0.721980806 |
| g UBA1232       | g unclassified Tremellomycetes | -0.052740688 | 0.154301254 | 0.552146547 |
| g UBA1232       | g Candida                      | 0.092152078  | 0.012682645 | 0.220012703 |
| g UBA1232       | g Cladosporium                 | -0.037553031 | 0.310610507 | 0.672399691 |
| g UBA1232       | g Debaryomyces                 | -0.006610855 | 0.858382275 | 0.952142599 |
| g UBA1232       | g Aspergillus                  | -0.013451662 | 0.716540075 | 0.903207513 |
| g UBA1232       | g Kazachstania                 | -0.014024052 | 0.705030834 | 0.898763556 |

|                   |                                |              |             |             |
|-------------------|--------------------------------|--------------|-------------|-------------|
| g UBA1232         | g Malassezia                   | -0.021496354 | 0.561732819 | 0.827199651 |
| g UBA1232         | g unclassified Fungi           | 0.036813814  | 0.32023791  | 0.677486799 |
| g UBA1232         | g Mycosphaerella               | 0.012486771  | 0.736086476 | 0.907602097 |
| g UBA1232         | g Simplicillium                | 0.032891037  | 0.374544106 | 0.718793205 |
| g UBA1232         | g unclassified Cordycipitaceae | -0.020503544 | 0.579945696 | 0.837127998 |
| g UBA1232         | g unidentified                 | 0.01256077   | 0.734581203 | 0.907315107 |
| g UBA11471        | g Verticillium                 | 0.084944078  | 0.021626975 | 0.2798591   |
| g UBA11471        | g unclassified Tremellomycetes | -0.030269045 | 0.413830576 | 0.742811081 |
| g UBA11471        | g Candida                      | 0.000258458  | 0.994434032 | 0.997274144 |
| g UBA11471        | g Cladosporium                 | 0.017528879  | 0.636103443 | 0.863201672 |
| g UBA11471        | g Debaryomyces                 | 0.020064446  | 0.588088013 | 0.84176212  |
| g UBA11471        | g Aspergillus                  | -0.02199809  | 0.552634756 | 0.820336555 |
| g UBA11471        | g Kazachstania                 | 0.029809916  | 0.420952065 | 0.74604389  |
| g UBA11471        | g Malassezia                   | 0.066600922  | 0.071922752 | 0.442158914 |
| g UBA11471        | g unclassified Fungi           | -0.020250665 | 0.584628468 | 0.839535683 |
| g UBA11471        | g Mycosphaerella               | 0.039940542  | 0.280830649 | 0.657094722 |
| g UBA11471        | g Simplicillium                | -0.029409849 | 0.427215574 | 0.750033229 |
| g UBA11471        | g unclassified Cordycipitaceae | 0.103065268  | 0.005283203 | 0.140695631 |
| g UBA11471        | g unidentified                 | -0.036101328 | 0.329699479 | 0.685438092 |
| g UBA1711         | g Verticillium                 | 0.066424595  | 0.072680517 | 0.442523148 |
| g UBA1711         | g unclassified Tremellomycetes | -0.056001043 | 0.130356655 | 0.517804933 |
| g UBA1711         | g Candida                      | 0.024298894  | 0.511861413 | 0.800194633 |
| g UBA1711         | g Cladosporium                 | 0.001206962  | 0.974012063 | 0.990490577 |
| g UBA1711         | g Debaryomyces                 | -0.102148186 | 0.005704697 | 0.146167328 |
| g UBA1711         | g Aspergillus                  | 0.086099644  | 0.019900529 | 0.271375511 |
| g UBA1711         | g Kazachstania                 | -0.041215543 | 0.265746647 | 0.643655332 |
| g UBA1711         | g Malassezia                   | 0.056959182  | 0.123897122 | 0.508632924 |
| g UBA1711         | g unclassified Fungi           | 0.087843554  | 0.017522516 | 0.257532317 |
| g UBA1711         | g Mycosphaerella               | 0.037526575  | 0.310951737 | 0.672399691 |
| g UBA1711         | g Simplicillium                | 0.026034741  | 0.482170344 | 0.780189053 |
| g UBA1711         | g unclassified Cordycipitaceae | 0.032638138  | 0.378229958 | 0.721666439 |
| g UBA1711         | g unidentified                 | 0.061286736  | 0.097776277 | 0.477597322 |
| g UBA3388         | g Verticillium                 | 0.059200277  | 0.109762346 | 0.492584069 |
| g UBA3388         | g unclassified Tremellomycetes | -0.084932751 | 0.021644522 | 0.2798591   |
| g UBA3388         | g Candida                      | 0.021486687  | 0.561908826 | 0.827219568 |
| g UBA3388         | g Cladosporium                 | -0.012550003 | 0.734800144 | 0.907315107 |
| g UBA3388         | g Debaryomyces                 | 0.03012952   | 0.415987163 | 0.743974758 |
| g UBA3388         | g Aspergillus                  | 0.033312886  | 0.368445416 | 0.71614358  |
| g UBA3388         | g Kazachstania                 | -0.052316213 | 0.157649501 | 0.55423489  |
| g UBA3388         | g Malassezia                   | 0.107428381  | 0.003637584 | 0.119915635 |
| g UBA3388         | g unclassified Fungi           | 0.044927679  | 0.225036518 | 0.612060698 |
| g UBA3388         | g Mycosphaerella               | 0.024430945  | 0.509569755 | 0.798892628 |
| g UBA3388         | g Simplicillium                | 0.044892059  | 0.225404754 | 0.612119514 |
| g UBA3388         | g unclassified Cordycipitaceae | -0.007414128 | 0.841390195 | 0.945781926 |
| g UBA3388         | g unidentified                 | 0.014642067  | 0.692679464 | 0.893516353 |
| g Dysgonomonas    | g Verticillium                 | 0.034265799  | 0.354897757 | 0.705850547 |
| g Dysgonomonas    | g unclassified Tremellomycetes | -0.029003892 | 0.433626343 | 0.754276448 |
| g Dysgonomonas    | g Candida                      | -0.010583323 | 0.775138732 | 0.919461727 |
| g Dysgonomonas    | g Cladosporium                 | -0.018250391 | 0.622272194 | 0.856123107 |
| g Dysgonomonas    | g Debaryomyces                 | 0.01432519   | 0.699002497 | 0.895610174 |
| g Dysgonomonas    | g Aspergillus                  | -0.005259351 | 0.887115741 | 0.962165284 |
| g Dysgonomonas    | g Kazachstania                 | 0.011479442  | 0.756675884 | 0.912213992 |
| g Dysgonomonas    | g Malassezia                   | 0.021005647  | 0.570700201 | 0.831953372 |
| g Dysgonomonas    | g unclassified Fungi           | -0.019054384 | 0.607015229 | 0.850786114 |
| g Dysgonomonas    | g Mycosphaerella               | -0.013407044 | 0.717439957 | 0.903293001 |
| g Dysgonomonas    | g Simplicillium                | 0.041339405  | 0.264311529 | 0.642342032 |
| g Dysgonomonas    | g unclassified Cordycipitaceae | 0.028614232  | 0.439831645 | 0.758246834 |
| g Dysgonomonas    | g unidentified                 | -0.010737446 | 0.771953952 | 0.917900008 |
| g Fermentimonas   | g Verticillium                 | 0.024283091  | 0.512136027 | 0.800269261 |
| g Fermentimonas   | g unclassified Tremellomycetes | -0.088554481 | 0.016626823 | 0.25135006  |
| g Fermentimonas   | g Candida                      | 0.052957469  | 0.152612232 | 0.549189615 |
| g Fermentimonas   | g Cladosporium                 | -0.012513496 | 0.735542719 | 0.90737623  |
| g Fermentimonas   | g Debaryomyces                 | 0.009227584  | 0.803310772 | 0.931173993 |
| g Fermentimonas   | g Aspergillus                  | -0.022268412 | 0.547763055 | 0.816743504 |
| g Fermentimonas   | g Kazachstania                 | -0.014600581 | 0.693506078 | 0.893979939 |
| g Fermentimonas   | g Malassezia                   | 0.049530327  | 0.181000316 | 0.575010893 |
| g Fermentimonas   | g unclassified Fungi           | 0.019421399  | 0.60010646  | 0.847048625 |
| g Fermentimonas   | g Mycosphaerella               | 0.021315474  | 0.565030375 | 0.829039606 |
| g Fermentimonas   | g Simplicillium                | 0.024284761  | 0.512107004 | 0.800269261 |
| g Fermentimonas   | g unclassified Cordycipitaceae | 0.033538587  | 0.365207917 | 0.713953478 |
| g Fermentimonas   | g unidentified                 | -0.014684453 | 0.691835305 | 0.893134834 |
| g MGYG-HGUT-04443 | g Verticillium                 | 0.0706893    | 0.056088557 | 0.403212711 |
| g MGYG-HGUT-04443 | g unclassified Tremellomycetes | -0.057670243 | 0.119266588 | 0.502959311 |
| g MGYG-HGUT-04443 | g Candida                      | -0.054645057 | 0.139940238 | 0.533896229 |
| g MGYG-HGUT-04443 | g Cladosporium                 | -0.012603957 | 0.733703161 | 0.907315107 |
| g MGYG-HGUT-04443 | g Debaryomyces                 | -0.022412183 | 0.54518069  | 0.816215242 |
| g MGYG-HGUT-04443 | g Aspergillus                  | 0.002111241  | 0.954557916 | 0.983174213 |
| g MGYG-HGUT-04443 | g Kazachstania                 | 0.039852471  | 0.281893587 | 0.657094722 |



|                   |                                |              |             |             |
|-------------------|--------------------------------|--------------|-------------|-------------|
| g MGYG-HGUT-04443 | g Malassezia                   | 0.031352217  | 0.397314195 | 0.732740506 |
| g MGYG-HGUT-04443 | g unclassified Fungi           | 0.01722712   | 0.641926254 | 0.865332945 |
| g MGYG-HGUT-04443 | g Mycosphaerella               | -0.014192738 | 0.70165168  | 0.897212331 |
| g MGYG-HGUT-04443 | g Simplicillium                | -0.064533764 | 0.081223279 | 0.452370916 |
| g MGYG-HGUT-04443 | g unclassified Cordycipitaceae | 0.070850996  | 0.05552724  | 0.401541153 |
| g MGYG-HGUT-04443 | g unidentified                 | 0.02790648   | 0.451231605 | 0.764111513 |
| g UBA1181         | g Verticillium                 | 0.060381589  | 0.10284127  | 0.482387553 |
| g UBA1181         | g unclassified Tremellomycetes | -0.094307937 | 0.010737455 | 0.200041806 |
| g UBA1181         | g Candida                      | -0.019515883 | 0.598333627 | 0.846523771 |
| g UBA1181         | g Cladosporium                 | -0.049472996 | 0.181506414 | 0.575010893 |
| g UBA1181         | g Debaryomyces                 | -0.030551122 | 0.409490825 | 0.740596806 |
| g UBA1181         | g Aspergillus                  | 0.0282078    | 0.446357894 | 0.761832544 |
| g UBA1181         | g Kazachstania                 | -0.029021337 | 0.433349729 | 0.754104067 |
| g UBA1181         | g Malassezia                   | 0.035719976  | 0.334837179 | 0.690018895 |
| g UBA1181         | g unclassified Fungi           | 0.046518747  | 0.209023292 | 0.598168571 |
| g UBA1181         | g Mycosphaerella               | 0.049074099  | 0.18505676  | 0.576342405 |
| g UBA1181         | g Simplicillium                | 0.046593792  | 0.208288899 | 0.597903264 |
| g UBA1181         | g unclassified Cordycipitaceae | 0.028507213  | 0.441544764 | 0.75910048  |
| g UBA1181         | g unidentified                 | 0.063975853  | 0.083893826 | 0.457299461 |
| g MGYG-HGUT-03511 | g Verticillium                 | 0.031601385  | 0.393571727 | 0.730757316 |
| g MGYG-HGUT-03511 | g unclassified Tremellomycetes | 0.017019569  | 0.645944018 | 0.868083795 |
| g MGYG-HGUT-03511 | g Candida                      | -0.029052935 | 0.432848937 | 0.754104067 |
| g MGYG-HGUT-03511 | g Cladosporium                 | 0.033217707  | 0.369815999 | 0.71692327  |
| g MGYG-HGUT-03511 | g Debaryomyces                 | 0.021547378  | 0.560804307 | 0.826752741 |
| g MGYG-HGUT-03511 | g Aspergillus                  | 0.069893605  | 0.058919896 | 0.41127331  |
| g MGYG-HGUT-03511 | g Kazachstania                 | 0.022351025  | 0.546278454 | 0.816307334 |
| g MGYG-HGUT-03511 | g Malassezia                   | 0.042599071  | 0.250019205 | 0.631737101 |
| g MGYG-HGUT-03511 | g unclassified Fungi           | 0.019789407  | 0.593214864 | 0.84388221  |
| g MGYG-HGUT-03511 | g Mycosphaerella               | 0.023492111  | 0.525978342 | 0.808232746 |
| g MGYG-HGUT-03511 | g Simplicillium                | 0.065683686  | 0.075936148 | 0.446374478 |
| g MGYG-HGUT-03511 | g unclassified Cordycipitaceae | 0.001317364  | 0.971635882 | 0.989767997 |
| g MGYG-HGUT-03511 | g unidentified                 | -0.00575308  | 0.876599649 | 0.957913373 |
| g RF16            | g Verticillium                 | -0.024408383 | 0.509960921 | 0.798892628 |
| g RF16            | g unclassified Tremellomycetes | -0.022589954 | 0.541995999 | 0.816215242 |
| g RF16            | g Candida                      | 0.098277466  | 0.007836804 | 0.170285535 |
| g RF16            | g Cladosporium                 | 0.014559613  | 0.694322734 | 0.894487847 |
| g RF16            | g Debaryomyces                 | -0.001115195 | 0.975987349 | 0.99078071  |
| g RF16            | g Aspergillus                  | 0.050723635  | 0.170702355 | 0.564974052 |
| g RF16            | g Kazachstania                 | 0.008915005  | 0.809843918 | 0.933584001 |
| g RF16            | g Malassezia                   | -0.018433559 | 0.618781706 | 0.855940917 |
| g RF16            | g unclassified Fungi           | 0.037778415  | 0.307713473 | 0.670833121 |
| g RF16            | g Mycosphaerella               | 0.061998568  | 0.093934437 | 0.47288973  |
| g RF16            | g Simplicillium                | 0.030653433  | 0.407923478 | 0.739278343 |
| g RF16            | g unclassified Cordycipitaceae | -0.050997383 | 0.168402969 | 0.563459023 |
| g RF16            | g unidentified                 | 0.049970285  | 0.177151292 | 0.572778705 |
| g Porphyromonas   | g Verticillium                 | 0.010124847  | 0.784634806 | 0.923685117 |
| g Porphyromonas   | g unclassified Tremellomycetes | -0.026001408 | 0.482731572 | 0.780449413 |
| g Porphyromonas   | g Candida                      | -0.008186698 | 0.825116755 | 0.939308882 |
| g Porphyromonas   | g Cladosporium                 | 0.04656146   | 0.20860507  | 0.597903264 |
| g Porphyromonas   | g Debaryomyces                 | 0.0495066    | 0.181209648 | 0.575010893 |
| g Porphyromonas   | g Aspergillus                  | 0.015884179  | 0.668103116 | 0.879827825 |
| g Porphyromonas   | g Kazachstania                 | -0.019647769 | 0.595862998 | 0.845230863 |
| g Porphyromonas   | g Malassezia                   | -0.026581791 | 0.473010699 | 0.775069559 |
| g Porphyromonas   | g unclassified Fungi           | 0.03942093   | 0.287141222 | 0.659118237 |
| g Porphyromonas   | g Mycosphaerella               | 0.041880573  | 0.258103938 | 0.637448375 |
| g Porphyromonas   | g Simplicillium                | -0.001054093 | 0.977302646 | 0.991604689 |
| g Porphyromonas   | g unclassified Cordycipitaceae | 0.014359817  | 0.69831052  | 0.895302916 |
| g Porphyromonas   | g unidentified                 | -0.035223896 | 0.34159715  | 0.694699556 |
| g F082            | g Verticillium                 | -0.046126524 | 0.212892117 | 0.600680647 |
| g F082            | g unclassified Tremellomycetes | -0.100417396 | 0.006583463 | 0.154128782 |
| g F082            | g Candida                      | 0.022845561  | 0.537433183 | 0.813920136 |
| g F082            | g Cladosporium                 | -0.049763024 | 0.178956895 | 0.574257008 |
| g F082            | g Debaryomyces                 | 0.031412289  | 0.396409965 | 0.732589983 |
| g F082            | g Aspergillus                  | 0.029084135  | 0.432354782 | 0.753932765 |
| g F082            | g Kazachstania                 | -0.048595706 | 0.189381956 | 0.579369719 |
| g F082            | g Malassezia                   | -0.041913207 | 0.25773286  | 0.637448375 |
| g F082            | g unclassified Fungi           | 0.033382454  | 0.367445625 | 0.716103178 |
| g F082            | g Mycosphaerella               | 0.02609397   | 0.481174021 | 0.780189053 |
| g F082            | g Simplicillium                | -0.037017088 | 0.317571307 | 0.676130231 |
| g F082            | g unclassified Cordycipitaceae | -0.04963281  | 0.180098244 | 0.575003251 |
| g F082            | g unidentified                 | 0.02400198   | 0.517033714 | 0.803178327 |
| g UBA1820         | g Verticillium                 | 0.066899775  | 0.070653189 | 0.439536772 |
| g UBA1820         | g unclassified Tremellomycetes | -0.125657555 | 0.000661408 | 0.047612352 |
| g UBA1820         | g Candida                      | -0.065796629 | 0.075432327 | 0.444977361 |
| g UBA1820         | g Cladosporium                 | -0.008691504 | 0.814523425 | 0.934766567 |
| g UBA1820         | g Debaryomyces                 | -0.088823903 | 0.016298014 | 0.249950122 |
| g UBA1820         | g Aspergillus                  | 0.041057832  | 0.267581683 | 0.644978472 |
| g UBA1820         | g Kazachstania                 | 0.024752775  | 0.504007112 | 0.794962478 |



|                   |                                |              |             |              |
|-------------------|--------------------------------|--------------|-------------|--------------|
| g UBA1820         | g Malassezia                   | 0.030422415  | 0.41146762  | 0.742142553  |
| g UBA1820         | g unclassified Fungi           | 0.008245803  | 0.823874764 | 0.939162206  |
| g UBA1820         | g Mycosphaerella               | 0.010355012  | 0.779863481 | 0.921371303  |
| g UBA1820         | g Simplicillium                | -0.103681229 | 0.005016085 | 0.138753557  |
| g UBA1820         | g unclassified Cordycipitaceae | 0.044800997  | 0.226348101 | 0.612967811  |
| g UBA1820         | g unidentified                 | 0.03342203   | 0.366877616 | 0.715671969  |
| g CAG-180         | g Verticillium                 | -0.007484373 | 0.839907649 | 0.945086212  |
| g CAG-180         | g unclassified Tremellomycetes | -0.090683887 | 0.014179618 | 0.230489577  |
| g CAG-180         | g Candida                      | -0.041087014 | 0.267241485 | 0.644908703  |
| g CAG-180         | g Cladosporium                 | 0.03440992   | 0.352876434 | 0.704818603  |
| g CAG-180         | g Debaryomyces                 | -0.130629212 | 0.00039867  | 0.035930399  |
| g CAG-180         | g Aspergillus                  | -0.000674189 | 0.985481796 | 0.994219503  |
| g CAG-180         | g Kazachstania                 | -0.042020094 | 0.256520022 | 0.63656207   |
| g CAG-180         | g Malassezia                   | 0.017482972  | 0.636987846 | 0.863812758  |
| g CAG-180         | g unclassified Fungi           | 0.069829584  | 0.059152759 | 0.412336263  |
| g CAG-180         | g Mycosphaerella               | -0.030187798 | 0.415085571 | 0.743848203  |
| g CAG-180         | g Simplicillium                | -0.013902607 | 0.707467244 | 0.90056759   |
| g CAG-180         | g unclassified Cordycipitaceae | 0.031792131  | 0.390721201 | 0.729773041  |
| g CAG-180         | g unidentified                 | 0.05423185   | 0.142965669 | 0.538044435  |
| g Ruminococcus E  | g Verticillium                 | 0.045043899  | 0.223838026 | 0.610957608  |
| g Ruminococcus E  | g unclassified Tremellomycetes | -0.020305727 | 0.583607347 | 0.83909415   |
| g Ruminococcus E  | g Candida                      | -0.07469247  | 0.043505321 | 0.363506278  |
| g Ruminococcus E  | g Cladosporium                 | 0.022221459  | 0.548607716 | 0.817643267  |
| g Ruminococcus E  | g Debaryomyces                 | -0.066494268 | 0.072380322 | 0.442493968  |
| g Ruminococcus E  | g Aspergillus                  | 0.035169887  | 0.342338345 | 0.695270538  |
| g Ruminococcus E  | g Kazachstania                 | -0.045817406 | 0.215977357 | 0.603186168  |
| g Ruminococcus E  | g Malassezia                   | -0.009441037 | 0.798857287 | 0.929569806  |
| g Ruminococcus E  | g unclassified Fungi           | 0.08454658   | 0.022250207 | 0.283321191  |
| g Ruminococcus E  | g Mycosphaerella               | -0.020312187 | 0.583487592 | 0.83909415   |
| g Ruminococcus E  | g Simplicillium                | -0.000296882 | 0.993606569 | 0.997274144  |
| g Ruminococcus E  | g unclassified Cordycipitaceae | 0.071339164  | 0.053860861 | 0.397628223  |
| g Ruminococcus E  | g unidentified                 | 0.004530103  | 0.902684027 | 0.966636316  |
| g CAG-177         | g Verticillium                 | -0.031323118 | 0.397752649 | 0.733150764  |
| g CAG-177         | g unclassified Tremellomycetes | -0.056289326 | 0.128386271 | 0.51543227   |
| g CAG-177         | g Candida                      | 0.040140504  | 0.278427386 | 0.655561858  |
| g CAG-177         | g Cladosporium                 | -0.002783701 | 0.940107845 | 0.978000513  |
| g CAG-177         | g Debaryomyces                 | -0.106159205 | 0.004060292 | 0.124539164  |
| g CAG-177         | g Aspergillus                  | 0.046263967  | 0.211530568 | 0.600680647  |
| g CAG-177         | g Kazachstania                 | -0.014305445 | 0.699397181 | 0.896007382  |
| g CAG-177         | g Malassezia                   | -0.022867785 | 0.537037379 | 0.813823506  |
| g CAG-177         | g unclassified Fungi           | 0.056353714  | 0.127949361 | 0.51521926   |
| g CAG-177         | g Mycosphaerella               | -0.038996553 | 0.292365539 | 0.660929744  |
| g CAG-177         | g Simplicillium                | -0.064241048 | 0.082615704 | 0.455217912  |
| g CAG-177         | g unclassified Cordycipitaceae | -0.025907845 | 0.484308739 | 0.781124079  |
| g CAG-177         | g unidentified                 | 0.027220356  | 0.462440725 | 0.769075712  |
| g UBA737          | g Verticillium                 | 0.048735508  | 0.188110376 | 0.578153936  |
| g UBA737          | g unclassified Tremellomycetes | -0.108505019 | 0.003310758 | 0.112650934  |
| g UBA737          | g Candida                      | -0.05928047  | 0.109281175 | 0.492300296  |
| g UBA737          | g Cladosporium                 | 0.01798128   | 0.627415793 | 0.859073688  |
| g UBA737          | g Debaryomyces                 | -0.161910872 | 1.09E-05    | 0.008626179  |
| g UBA737          | g Aspergillus                  | 0.106161652  | 0.004059436 | 0.124539164  |
| g UBA737          | g Kazachstania                 | -0.061229092 | 0.098092796 | 0.477873659  |
| g UBA737          | g Malassezia                   | 0.029060561  | 0.432728123 | 0.754104067  |
| g UBA737          | g unclassified Fungi           | 0.091072407  | 0.01376906  | 0.22695357   |
| g UBA737          | g Mycosphaerella               | 0.002586102  | 0.944352099 | 0.980007248  |
| g UBA737          | g Simplicillium                | -0.004828069 | 0.896318064 | 0.965082397  |
| g UBA737          | g unclassified Cordycipitaceae | 0.056160206  | 0.129265916 | 0.517100846  |
| g UBA737          | g unidentified                 | 0.07056853   | 0.056510873 | 0.404484002  |
| g MGYG-HGUT-02711 | g Verticillium                 | 0.049765222  | 0.178937672 | 0.574257008  |
| g MGYG-HGUT-02711 | g unclassified Tremellomycetes | -0.074722928 | 0.043419557 | 0.363506278  |
| g MGYG-HGUT-02711 | g Candida                      | -0.044480371 | 0.229691953 | 0.6150665767 |
| g MGYG-HGUT-02711 | g Cladosporium                 | 0.041827308  | 0.258710412 | 0.637931914  |
| g MGYG-HGUT-02711 | g Debaryomyces                 | -0.136710911 | 0.00020944  | 0.023984578  |
| g MGYG-HGUT-02711 | g Aspergillus                  | 0.074358492  | 0.044455133 | 0.366945566  |
| g MGYG-HGUT-02711 | g Kazachstania                 | -0.036391917 | 0.325818952 | 0.682100836  |
| g MGYG-HGUT-02711 | g Malassezia                   | 0.014676505  | 0.69199357  | 0.893134834  |
| g MGYG-HGUT-02711 | g unclassified Fungi           | 0.116143206  | 0.001658361 | 0.080131385  |
| g MGYG-HGUT-02711 | g Mycosphaerella               | -0.046886699 | 0.205440329 | 0.594956092  |
| g MGYG-HGUT-02711 | g Simplicillium                | -0.04430896  | 0.231493927 | 0.617045021  |
| g MGYG-HGUT-02711 | g unclassified Cordycipitaceae | 0.061567158  | 0.096248112 | 0.476824683  |
| g MGYG-HGUT-02711 | g unidentified                 | 0.014578351  | 0.693949179 | 0.894442169  |
| g Eubacterium R   | g Verticillium                 | 0.031759132  | 0.391213442 | 0.729890405  |
| g Eubacterium R   | g unclassified Tremellomycetes | -0.060184048 | 0.103973877 | 0.483414571  |
| g Eubacterium R   | g Candida                      | -0.039184193 | 0.290047787 | 0.660061436  |
| g Eubacterium R   | g Cladosporium                 | 0.049489022  | 0.181364841 | 0.575010893  |
| g Eubacterium R   | g Debaryomyces                 | -0.108270915 | 0.003379463 | 0.113890048  |
| g Eubacterium R   | g Aspergillus                  | 0.082284139  | 0.02610249  | 0.299909386  |
| g Eubacterium R   | g Kazachstania                 | 0.02065797   | 0.577094711 | 0.836262521  |

|                   |                                |              |             |             |
|-------------------|--------------------------------|--------------|-------------|-------------|
| g Eubacterium R   | g Malassezia                   | 0.027631159  | 0.455710964 | 0.766301195 |
| g Eubacterium R   | g unclassified Fungi           | 0.101362378  | 0.006089677 | 0.148686802 |
| g Eubacterium R   | g Mycosphaerella               | 0.025699789  | 0.487825849 | 0.783353899 |
| g Eubacterium R   | g Simplicillium                | 0.014569676  | 0.694122101 | 0.89444716  |
| g Eubacterium R   | g unclassified Cordycipitaceae | 0.038363502  | 0.300276455 | 0.667386268 |
| g Eubacterium R   | g unidentified                 | 0.074543006  | 0.043928252 | 0.365142621 |
| g MGYG-HGUT-02848 | g Verticillium                 | -0.003006839 | 0.935317093 | 0.977050887 |
| g MGYG-HGUT-02848 | g unclassified Tremellomycetes | -0.055434454 | 0.134297383 | 0.52297511  |
| g MGYG-HGUT-02848 | g Candida                      | -0.090452639 | 0.014429067 | 0.232756693 |
| g MGYG-HGUT-02848 | g Cladosporium                 | 0.063291565  | 0.087265687 | 0.465211841 |
| g MGYG-HGUT-02848 | g Debaryomyces                 | -0.085198108 | 0.021236675 | 0.278255687 |
| g MGYG-HGUT-02848 | g Aspergillus                  | -0.004518065 | 0.902941351 | 0.966636316 |
| g MGYG-HGUT-02848 | g Kazachstania                 | -0.056733323 | 0.125396886 | 0.511545815 |
| g MGYG-HGUT-02848 | g Malassezia                   | 0.003461282  | 0.925567637 | 0.974172444 |
| g MGYG-HGUT-02848 | g unclassified Fungi           | 0.072777416  | 0.049191824 | 0.38191334  |
| g MGYG-HGUT-02848 | g Mycosphaerella               | -0.037966331 | 0.305311727 | 0.670057703 |
| g MGYG-HGUT-02848 | g Simplicillium                | -0.008543135 | 0.817633524 | 0.93628373  |
| g MGYG-HGUT-02848 | g unclassified Cordycipitaceae | 0.059785863  | 0.106286931 | 0.487106239 |
| g MGYG-HGUT-02848 | g unidentified                 | 0.008881346  | 0.810548226 | 0.933891925 |
| g RUG806          | g Verticillium                 | 0.060092693  | 0.104501001 | 0.484596813 |
| g RUG806          | g unclassified Tremellomycetes | -0.054153186 | 0.143547265 | 0.538689764 |
| g RUG806          | g Candida                      | -0.025429281 | 0.492419182 | 0.786058196 |
| g RUG806          | g Cladosporium                 | 0.036355428  | 0.326304595 | 0.682374023 |
| g RUG806          | g Debaryomyces                 | -0.121856046 | 0.000962396 | 0.05906749  |
| g RUG806          | g Aspergillus                  | 0.086114137  | 0.019879662 | 0.271375511 |
| g RUG806          | g Kazachstania                 | -0.016668476 | 0.652763935 | 0.872275283 |
| g RUG806          | g Malassezia                   | 0.023119006  | 0.532573371 | 0.811490628 |
| g RUG806          | g unclassified Fungi           | 0.106974219  | 0.003784026 | 0.121638936 |
| g RUG806          | g Mycosphaerella               | -0.001123791 | 0.97580231  | 0.990687906 |
| g RUG806          | g Simplicillium                | -0.020738826 | 0.575604594 | 0.835710866 |
| g RUG806          | g unclassified Cordycipitaceae | 0.051071198  | 0.167786942 | 0.563342385 |
| g RUG806          | g unidentified                 | 0.021464446  | 0.562313859 | 0.827219568 |
| g An200           | g Verticillium                 | 0.092479796  | 0.012368213 | 0.21883174  |
| g An200           | g unclassified Tremellomycetes | -0.05105295  | 0.167939073 | 0.563342385 |
| g An200           | g Candida                      | -0.034141624 | 0.356645154 | 0.707407502 |
| g An200           | g Cladosporium                 | 0.057317789  | 0.121544616 | 0.506172817 |
| g An200           | g Debaryomyces                 | -0.136651517 | 0.000210789 | 0.023984578 |
| g An200           | g Aspergillus                  | 0.081746308  | 0.027098682 | 0.30473778  |
| g An200           | g Kazachstania                 | -0.040523673 | 0.273861356 | 0.651089839 |
| g An200           | g Malassezia                   | 0.069113     | 0.061811598 | 0.416988935 |
| g An200           | g unclassified Fungi           | 0.069108866  | 0.06182722  | 0.416988935 |
| g An200           | g Mycosphaerella               | 0.017787779  | 0.631125472 | 0.860229872 |
| g An200           | g Simplicillium                | -0.019107387 | 0.606015312 | 0.85020356  |
| g An200           | g unclassified Cordycipitaceae | 0.086889405  | 0.018790835 | 0.265835046 |
| g An200           | g unidentified                 | 0.013460805  | 0.716355704 | 0.903168431 |
| g MGYG-HGUT-03581 | g Verticillium                 | -0.007692485 | 0.835518691 | 0.942686724 |
| g MGYG-HGUT-03581 | g unclassified Tremellomycetes | -0.065267145 | 0.077818005 | 0.449905153 |
| g MGYG-HGUT-03581 | g Candida                      | -0.00173365  | 0.962678574 | 0.986228955 |
| g MGYG-HGUT-03581 | g Cladosporium                 | 0.003456568  | 0.925668713 | 0.974172444 |
| g MGYG-HGUT-03581 | g Debaryomyces                 | -0.009729026 | 0.792859008 | 0.927022902 |
| g MGYG-HGUT-03581 | g Aspergillus                  | -0.016877704 | 0.648696185 | 0.8699978   |
| g MGYG-HGUT-03581 | g Kazachstania                 | -0.050239093 | 0.174829737 | 0.570082525 |
| g MGYG-HGUT-03581 | g Malassezia                   | -0.037195848 | 0.315238323 | 0.675194937 |
| g MGYG-HGUT-03581 | g unclassified Fungi           | 0.053042148  | 0.151956292 | 0.548993338 |
| g MGYG-HGUT-03581 | g Mycosphaerella               | -0.095291181 | 0.009941774 | 0.193034582 |
| g MGYG-HGUT-03581 | g Simplicillium                | 0.007120149  | 0.847600784 | 0.948213968 |
| g MGYG-HGUT-03581 | g unclassified Cordycipitaceae | 0.016412372  | 0.6577571   | 0.874757951 |
| g MGYG-HGUT-03581 | g unidentified                 | 0.001933537  | 0.958379169 | 0.984847119 |
| g MGYG-HGUT-03916 | g Verticillium                 | 0.062949767  | 0.088990322 | 0.465955266 |
| g MGYG-HGUT-03916 | g unclassified Tremellomycetes | -0.043339198 | 0.241877432 | 0.626112276 |
| g MGYG-HGUT-03916 | g Candida                      | -0.044426835 | 0.230253681 | 0.615133665 |
| g MGYG-HGUT-03916 | g Cladosporium                 | 0.041613116  | 0.261159141 | 0.639127203 |
| g MGYG-HGUT-03916 | g Debaryomyces                 | -0.162896688 | 9.59E-06    | 0.008626179 |
| g MGYG-HGUT-03916 | g Aspergillus                  | 0.103046121  | 0.005291709 | 0.140695631 |
| g MGYG-HGUT-03916 | g Kazachstania                 | -0.027204087 | 0.462708383 | 0.769075712 |
| g MGYG-HGUT-03916 | g Malassezia                   | 0.036775436  | 0.320742991 | 0.678140479 |
| g MGYG-HGUT-03916 | g unclassified Fungi           | 0.048692855  | 0.188497664 | 0.578390625 |
| g MGYG-HGUT-03916 | g Mycosphaerella               | -0.042872236 | 0.246992283 | 0.629733759 |
| g MGYG-HGUT-03916 | g Simplicillium                | -0.01835253  | 0.620324766 | 0.856123107 |
| g MGYG-HGUT-03916 | g unclassified Cordycipitaceae | 0.064431389  | 0.081708091 | 0.453483887 |
| g MGYG-HGUT-03916 | g unidentified                 | 0.051002441  | 0.168360701 | 0.563459023 |
| g Acutalibacter   | g Verticillium                 | 0.088242364  | 0.017014995 | 0.254671396 |
| g Acutalibacter   | g unclassified Tremellomycetes | -0.007947514 | 0.830147273 | 0.940630371 |
| g Acutalibacter   | g Candida                      | -0.041563535 | 0.261728246 | 0.639780157 |
| g Acutalibacter   | g Cladosporium                 | 0.062217908  | 0.092775287 | 0.471767461 |
| g Acutalibacter   | g Debaryomyces                 | -0.12182771  | 0.000965052 | 0.05906749  |
| g Acutalibacter   | g Aspergillus                  | 0.016360563  | 0.65876906  | 0.874996133 |
| g Acutalibacter   | g Kazachstania                 | -0.023591244 | 0.524233097 | 0.806899584 |

|                   |                                |              |             |             |
|-------------------|--------------------------------|--------------|-------------|-------------|
| g Acutalibacter   | g Malassezia                   | 0.090712295  | 0.014149238 | 0.230349589 |
| g Acutalibacter   | g unclassified Fungi           | 0.034923708  | 0.345729779 | 0.697400798 |
| g Acutalibacter   | g Mycosphaerella               | -0.032813342 | 0.375674092 | 0.719866895 |
| g Acutalibacter   | g Simplicillium                | 0.008781938  | 0.812629175 | 0.934142805 |
| g Acutalibacter   | g unclassified Cordycipitaceae | 0.100095447  | 0.006759724 | 0.15652385  |
| g Acutalibacter   | g unidentified                 | -0.017370838 | 0.639150265 | 0.86388896  |
| g UBA5905         | g Verticillium                 | 0.037677329  | 0.309010592 | 0.671861535 |
| g UBA5905         | g unclassified Tremellomycetes | 0.001261851  | 0.972830654 | 0.990236051 |
| g UBA5905         | g Candida                      | -0.028272992 | 0.44530738  | 0.76170364  |
| g UBA5905         | g Cladosporium                 | 0.057440043  | 0.120750629 | 0.505177927 |
| g UBA5905         | g Debaryomyces                 | -0.12073029  | 0.001073308 | 0.062177529 |
| g UBA5905         | g Aspergillus                  | 0.047117369  | 0.203217002 | 0.593061862 |
| g UBA5905         | g Kazachstania                 | -0.028697515 | 0.438501109 | 0.757586732 |
| g UBA5905         | g Malassezia                   | 0.045825734  | 0.215893821 | 0.603186168 |
| g UBA5905         | g unclassified Fungi           | 0.03162788   | 0.393175037 | 0.730757316 |
| g UBA5905         | g Mycosphaerella               | -0.012671108 | 0.73233859  | 0.907315107 |
| g UBA5905         | g Simplicillium                | -0.025975261 | 0.483172042 | 0.780449413 |
| g UBA5905         | g unclassified Cordycipitaceae | 0.045940382  | 0.21474613  | 0.602131306 |
| g UBA5905         | g unidentified                 | 0.004238032  | 0.908930119 | 0.969000455 |
| g GCA-900066995   | g Verticillium                 | 0.07069651   | 0.056063429 | 0.403212711 |
| g GCA-900066995   | g unclassified Tremellomycetes | 0.015502356  | 0.675621605 | 0.883736443 |
| g GCA-900066995   | g Candida                      | -0.022406302 | 0.545286205 | 0.816215242 |
| g GCA-900066995   | g Cladosporium                 | 0.017124926  | 0.64390323  | 0.867151216 |
| g GCA-900066995   | g Debaryomyces                 | -0.062610537 | 0.090728999 | 0.469307225 |
| g GCA-900066995   | g Aspergillus                  | 0.018146544  | 0.624254894 | 0.8570016   |
| g GCA-900066995   | g Kazachstania                 | 0.026802375  | 0.46934452  | 0.77312758  |
| g GCA-900066995   | g Malassezia                   | 0.058960377  | 0.111211765 | 0.494471808 |
| g GCA-900066995   | g unclassified Fungi           | -0.006281972 | 0.865358729 | 0.954673277 |
| g GCA-900066995   | g Mycosphaerella               | 0.040043911  | 0.279586555 | 0.656601603 |
| g GCA-900066995   | g Simplicillium                | -0.010321332 | 0.780561143 | 0.921452255 |
| g GCA-900066995   | g unclassified Cordycipitaceae | 0.08337872   | 0.024172267 | 0.289683947 |
| g GCA-900066995   | g unidentified                 | -0.041502912 | 0.262425248 | 0.640547841 |
| g Clostridium E   | g Verticillium                 | 0.032440853  | 0.381120701 | 0.723098466 |
| g Clostridium E   | g unclassified Tremellomycetes | -0.003172713 | 0.931757302 | 0.976058688 |
| g Clostridium E   | g Candida                      | 0.015992293  | 0.665980202 | 0.879421986 |
| g Clostridium E   | g Cladosporium                 | 0.023633326  | 0.523493126 | 0.806147397 |
| g Clostridium E   | g Debaryomyces                 | 0.041382445  | 0.263814098 | 0.641913265 |
| g Clostridium E   | g Aspergillus                  | -0.021882088 | 0.55473182  | 0.821420199 |
| g Clostridium E   | g Kazachstania                 | 0.043000799  | 0.245576595 | 0.628857614 |
| g Clostridium E   | g Malassezia                   | 0.0394107    | 0.287266425 | 0.659118237 |
| g Clostridium E   | g unclassified Fungi           | -0.024902272 | 0.501434074 | 0.792913235 |
| g Clostridium E   | g Mycosphaerella               | 0.046570132  | 0.208520229 | 0.597903264 |
| g Clostridium E   | g Simplicillium                | 0.008983797  | 0.80840496  | 0.933453782 |
| g Clostridium E   | g unclassified Cordycipitaceae | 0.057965858  | 0.117381791 | 0.501872737 |
| g Clostridium E   | g unidentified                 | -0.046627626 | 0.207958398 | 0.597903264 |
| g CAG-488         | g Verticillium                 | 0.078743397  | 0.033283329 | 0.326904486 |
| g CAG-488         | g unclassified Tremellomycetes | -0.06607344  | 0.074209028 | 0.444193078 |
| g CAG-488         | g Candida                      | -0.093220556 | 0.011682752 | 0.210607978 |
| g CAG-488         | g Cladosporium                 | 0.033639013  | 0.363773113 | 0.713515619 |
| g CAG-488         | g Debaryomyces                 | -0.1488958   | 5.31E-05    | 0.013389478 |
| g CAG-488         | g Aspergillus                  | 0.086426478  | 0.019434552 | 0.269183808 |
| g CAG-488         | g Kazachstania                 | -0.060820269 | 0.1003611   | 0.478819278 |
| g CAG-488         | g Malassezia                   | 0.06351381   | 0.086158797 | 0.462104608 |
| g CAG-488         | g unclassified Fungi           | 0.07246798   | 0.05016666  | 0.385192726 |
| g CAG-488         | g Mycosphaerella               | -0.047715548 | 0.197532975 | 0.58591995  |
| g CAG-488         | g Simplicillium                | 0.019250294  | 0.60332956  | 0.848533164 |
| g CAG-488         | g unclassified Cordycipitaceae | 0.080881935  | 0.02876831  | 0.31117391  |
| g CAG-488         | g unidentified                 | 0.053088534  | 0.151597887 | 0.548829076 |
| g UBA1691         | g Verticillium                 | 0.032714042  | 0.377121373 | 0.720869551 |
| g UBA1691         | g unclassified Tremellomycetes | 0.038132181  | 0.303202354 | 0.669054739 |
| g UBA1691         | g Candida                      | -0.0291878   | 0.430715266 | 0.753212133 |
| g UBA1691         | g Cladosporium                 | 0.032762961  | 0.376407952 | 0.720393079 |
| g UBA1691         | g Debaryomyces                 | -0.061778767 | 0.095107617 | 0.474527669 |
| g UBA1691         | g Aspergillus                  | -0.01671956  | 0.651769826 | 0.871607266 |
| g UBA1691         | g Kazachstania                 | -0.018647951 | 0.614707105 | 0.853151823 |
| g UBA1691         | g Malassezia                   | 0.036518491  | 0.324137987 | 0.680696206 |
| g UBA1691         | g unclassified Fungi           | -0.013665343 | 0.712235819 | 0.902091837 |
| g UBA1691         | g Mycosphaerella               | -0.045450445 | 0.219681462 | 0.607083027 |
| g UBA1691         | g Simplicillium                | -0.022451886 | 0.544468626 | 0.816215242 |
| g UBA1691         | g unclassified Cordycipitaceae | 0.039847536  | 0.281953225 | 0.657094722 |
| g UBA1691         | g unidentified                 | -0.023437516 | 0.526940766 | 0.808837394 |
| g MGYG-HGUT-00935 | g Verticillium                 | 0.032986607  | 0.373157007 | 0.718484102 |
| g MGYG-HGUT-00935 | g unclassified Tremellomycetes | 0.011724558  | 0.751649282 | 0.910479934 |
| g MGYG-HGUT-00935 | g Candida                      | -0.001037661 | 0.977656372 | 0.991604689 |
| g MGYG-HGUT-00935 | g Cladosporium                 | 0.020647129  | 0.577294638 | 0.836262521 |
| g MGYG-HGUT-00935 | g Debaryomyces                 | 0.022930604  | 0.535919375 | 0.813293966 |
| g MGYG-HGUT-00935 | g Aspergillus                  | -0.022430338 | 0.544855035 | 0.816215242 |
| g MGYG-HGUT-00935 | g Kazachstania                 | 0.052160319  | 0.158892882 | 0.555285495 |

|                         |                                |              |             |             |
|-------------------------|--------------------------------|--------------|-------------|-------------|
| g MGYG-HGUT-00935       | g Malassezia                   | 0.04434706   | 0.231092533 | 0.616380421 |
| g MGYG-HGUT-00935       | g unclassified Fungi           | -0.027821276 | 0.452615172 | 0.765107628 |
| g MGYG-HGUT-00935       | g Mycosphaerella               | 0.045486263  | 0.219317925 | 0.60663028  |
| g MGYG-HGUT-00935       | g Simplicillium                | 0.008639416  | 0.815614947 | 0.935085305 |
| g MGYG-HGUT-00935       | g unclassified Cordycipitaceae | 0.04414302   | 0.233247921 | 0.617638717 |
| g MGYG-HGUT-00935       | g unidentified                 | -0.039861362 | 0.281786164 | 0.657094722 |
| g CAG-217               | g Verticillium                 | 0.038298015  | 0.301102857 | 0.667386268 |
| g CAG-217               | g unclassified Tremellomycetes | 0.021461076  | 0.562375224 | 0.827219568 |
| g CAG-217               | g Candida                      | 0.00737851   | 0.842142155 | 0.945972695 |
| g CAG-217               | g Cladosporium                 | 0.050252331  | 0.174715995 | 0.569927454 |
| g CAG-217               | g Debaryomyces                 | -0.062006221 | 0.093893795 | 0.47288973  |
| g CAG-217               | g Aspergillus                  | 0.010544493  | 0.775941727 | 0.92000172  |
| g CAG-217               | g Kazachstania                 | -0.063157327 | 0.087939782 | 0.465539911 |
| g CAG-217               | g Malassezia                   | 0.077890149  | 0.035246725 | 0.333913017 |
| g CAG-217               | g unclassified Fungi           | -0.005821014 | 0.875154357 | 0.957673757 |
| g CAG-217               | g Mycosphaerella               | -0.003166875 | 0.931882563 | 0.976058688 |
| g CAG-217               | g Simplicillium                | 0.053047193  | 0.151917283 | 0.548993338 |
| g CAG-217               | g unclassified Cordycipitaceae | 0.077671452  | 0.035765565 | 0.336718155 |
| g CAG-217               | g unidentified                 | -0.017508481 | 0.636496353 | 0.863367624 |
| g Marseille-P4683       | g Verticillium                 | 0.018658134  | 0.614513857 | 0.853048096 |
| g Marseille-P4683       | g unclassified Tremellomycetes | 0.029321554  | 0.428605203 | 0.751274884 |
| g Marseille-P4683       | g Candida                      | -0.045737677 | 0.216778296 | 0.604422504 |
| g Marseille-P4683       | g Cladosporium                 | 0.037656153  | 0.309282774 | 0.672075778 |
| g Marseille-P4683       | g Debaryomyces                 | -0.108230369 | 0.003391493 | 0.113932627 |
| g Marseille-P4683       | g Aspergillus                  | 0.013694659  | 0.711646017 | 0.902091837 |
| g Marseille-P4683       | g Kazachstania                 | 0.010219425  | 0.782673203 | 0.922514306 |
| g Marseille-P4683       | g Malassezia                   | 0.030800248  | 0.405680595 | 0.738077169 |
| g Marseille-P4683       | g unclassified Fungi           | 0.023899884  | 0.518818475 | 0.80396368  |
| g Marseille-P4683       | g Mycosphaerella               | -0.039369189 | 0.287774797 | 0.659362601 |
| g Marseille-P4683       | g Simplicillium                | -0.01373666  | 0.710801285 | 0.902091837 |
| g Marseille-P4683       | g unclassified Cordycipitaceae | 0.039871991  | 0.281657766 | 0.657094722 |
| g Marseille-P4683       | g unidentified                 | -0.03768534  | 0.308907661 | 0.671775764 |
| g Clostridium_A         | g Verticillium                 | 0.011289933  | 0.760569222 | 0.914272806 |
| g Clostridium_A         | g unclassified Tremellomycetes | -0.048899872 | 0.186623446 | 0.5772845   |
| g Clostridium_A         | g Candida                      | -0.001217891 | 0.973776824 | 0.990490577 |
| g Clostridium_A         | g Cladosporium                 | 0.019761117  | 0.593743363 | 0.8441015   |
| g Clostridium_A         | g Debaryomyces                 | -0.080388739 | 0.029760009 | 0.31335365  |
| g Clostridium_A         | g Aspergillus                  | 0.014840121  | 0.688738262 | 0.891526396 |
| g Clostridium_A         | g Kazachstania                 | -0.054614935 | 0.140159112 | 0.533896229 |
| g Clostridium_A         | g Malassezia                   | 0.030967953  | 0.403127581 | 0.736936858 |
| g Clostridium_A         | g unclassified Fungi           | 0.028408285  | 0.443131771 | 0.760249741 |
| g Clostridium_A         | g Mycosphaerella               | -0.005927698 | 0.872885499 | 0.956891572 |
| g Clostridium_A         | g Simplicillium                | -0.009430822 | 0.799070267 | 0.929634918 |
| g Clostridium_A         | g unclassified Cordycipitaceae | 0.032962107  | 0.373512299 | 0.718484102 |
| g Clostridium_A         | g unidentified                 | 0.021369009  | 0.564053432 | 0.828451033 |
| g UBA1417               | g Verticillium                 | -0.044168708 | 0.232975787 | 0.617638717 |
| g UBA1417               | g unclassified Tremellomycetes | -0.047621756 | 0.198416446 | 0.58591995  |
| g UBA1417               | g Candida                      | -0.024258454 | 0.51256431  | 0.800618989 |
| g UBA1417               | g Cladosporium                 | -0.027284208 | 0.461391087 | 0.769075712 |
| g UBA1417               | g Debaryomyces                 | -0.105848098 | 0.004170478 | 0.1257322   |
| g UBA1417               | g Aspergillus                  | 0.080837552  | 0.028856374 | 0.31117391  |
| g UBA1417               | g Kazachstania                 | -0.043490056 | 0.240241028 | 0.623707202 |
| g UBA1417               | g Malassezia                   | -0.024075192 | 0.515755848 | 0.802695096 |
| g UBA1417               | g unclassified Fungi           | 0.051039436  | 0.16805181  | 0.563459023 |
| g UBA1417               | g Mycosphaerella               | 0.015915901  | 0.667479952 | 0.879421986 |
| g UBA1417               | g Simplicillium                | 0.037898597  | 0.306175997 | 0.670475339 |
| g UBA1417               | g unclassified Cordycipitaceae | -0.009714351 | 0.793164369 | 0.927022902 |
| g UBA1417               | g unidentified                 | 0.107030218  | 0.003765685 | 0.121489271 |
| g MGYG-HGUT-00932       | g Verticillium                 | 0.071786665  | 0.052370103 | 0.392757215 |
| g MGYG-HGUT-00932       | g unclassified Tremellomycetes | -0.077259027 | 0.036761707 | 0.34011037  |
| g MGYG-HGUT-00932       | g Candida                      | -0.024391365 | 0.510256078 | 0.798892628 |
| g MGYG-HGUT-00932       | g Cladosporium                 | 0.011764692  | 0.750827251 | 0.910387945 |
| g MGYG-HGUT-00932       | g Debaryomyces                 | -0.076230289 | 0.03934972  | 0.348742662 |
| g MGYG-HGUT-00932       | g Aspergillus                  | 0.043492875  | 0.240210523 | 0.623707202 |
| g MGYG-HGUT-00932       | g Kazachstania                 | 0.000286143  | 0.993837832 | 0.997274144 |
| g MGYG-HGUT-00932       | g Malassezia                   | 0.012646507  | 0.73283841  | 0.907315107 |
| g MGYG-HGUT-00932       | g unclassified Fungi           | 0.0268777    | 0.468096182 | 0.773111449 |
| g MGYG-HGUT-00932       | g Mycosphaerella               | 0.030391108  | 0.411949313 | 0.742316502 |
| g MGYG-HGUT-00932       | g Simplicillium                | -0.001050157 | 0.977387374 | 0.991604689 |
| g MGYG-HGUT-00932       | g unclassified Cordycipitaceae | 0.065355639  | 0.077415067 | 0.449313418 |
| g MGYG-HGUT-00932       | g unidentified                 | 0.055665917  | 0.132676552 | 0.52120331  |
| g Anaeromassilibacillus | g Verticillium                 | 0.046696394  | 0.207287845 | 0.597418526 |
| g Anaeromassilibacillus | g unclassified Tremellomycetes | 0.000524493  | 0.988705168 | 0.995548313 |
| g Anaeromassilibacillus | g Candida                      | -0.023276373 | 0.529786662 | 0.810379077 |
| g Anaeromassilibacillus | g Cladosporium                 | 0.094936875  | 0.01022224  | 0.1959478   |
| g Anaeromassilibacillus | g Debaryomyces                 | -0.120885764 | 0.001057318 | 0.062177529 |
| g Anaeromassilibacillus | g Aspergillus                  | 0.033247969  | 0.369379879 | 0.71692327  |
| g Anaeromassilibacillus | g Kazachstania                 | -0.0205735   | 0.578653356 | 0.836772676 |



|                         |                                |              |             |             |
|-------------------------|--------------------------------|--------------|-------------|-------------|
| g Anaeromassilibacillus | g Malassezia                   | 0.036341643  | 0.326488185 | 0.682388068 |
| g Anaeromassilibacillus | g unclassified Fungi           | 0.026651333  | 0.471853184 | 0.774056714 |
| g Anaeromassilibacillus | g Mycosphaerella               | -0.02856434  | 0.440629831 | 0.758786798 |
| g Anaeromassilibacillus | g Simplicillium                | -0.004962222 | 0.893454078 | 0.964370576 |
| g Anaeromassilibacillus | g unclassified Cordycipitaceae | 0.055706255  | 0.132395632 | 0.520630567 |
| g Anaeromassilibacillus | g unidentified                 | -0.019964421 | 0.589950152 | 0.842338356 |
| g MGYG-HGUT-03160       | g Verticillium                 | 0.043567052  | 0.239408826 | 0.623263007 |
| g MGYG-HGUT-03160       | g unclassified Tremellomycetes | 0.029799614  | 0.421112675 | 0.74604389  |
| g MGYG-HGUT-03160       | g Candida                      | -0.028117842 | 0.447809772 | 0.762502994 |
| g MGYG-HGUT-03160       | g Cladosporium                 | 0.064835199  | 0.079809308 | 0.45101344  |
| g MGYG-HGUT-03160       | g Debaryomyces                 | -0.102036934 | 0.005757836 | 0.146476357 |
| g MGYG-HGUT-03160       | g Aspergillus                  | 0.032615254  | 0.378564581 | 0.721666439 |
| g MGYG-HGUT-03160       | g Kazachstania                 | -0.01520833  | 0.681433439 | 0.886955574 |
| g MGYG-HGUT-03160       | g Malassezia                   | 0.044161879  | 0.233048106 | 0.617638717 |
| g MGYG-HGUT-03160       | g unclassified Fungi           | 0.071734436  | 0.052542299 | 0.393490878 |
| g MGYG-HGUT-03160       | g Mycosphaerella               | -0.032324573 | 0.382830824 | 0.723801283 |
| g MGYG-HGUT-03160       | g Simplicillium                | -0.003746268 | 0.919459239 | 0.97209688  |
| g MGYG-HGUT-03160       | g unclassified Cordycipitaceae | 0.061396228  | 0.097177312 | 0.477459115 |
| g MGYG-HGUT-03160       | g unidentified                 | -0.010909573 | 0.768401667 | 0.916865092 |
| g MGYG-HGUT-04236       | g Verticillium                 | -0.048105729 | 0.193888498 | 0.582877298 |
| g MGYG-HGUT-04236       | g unclassified Tremellomycetes | 0.0173649    | 0.639264868 | 0.86388896  |
| g MGYG-HGUT-04236       | g Candida                      | -0.021868514 | 0.554977455 | 0.82159337  |
| g MGYG-HGUT-04236       | g Cladosporium                 | 0.0052985    | 0.886281137 | 0.96210924  |
| g MGYG-HGUT-04236       | g Debaryomyces                 | -0.010544554 | 0.775940464 | 0.92000172  |
| g MGYG-HGUT-04236       | g Aspergillus                  | 0.002848391  | 0.938718737 | 0.978000513 |
| g MGYG-HGUT-04236       | g Kazachstania                 | 0.010080878  | 0.785547218 | 0.924142374 |
| g MGYG-HGUT-04236       | g Malassezia                   | 0.033822281  | 0.36116379  | 0.711747526 |
| g MGYG-HGUT-04236       | g unclassified Fungi           | 0.002959599  | 0.936331155 | 0.977345273 |
| g MGYG-HGUT-04236       | g Mycosphaerella               | -0.050905633 | 0.110392737 | 0.493525958 |
| g MGYG-HGUT-04236       | g Simplicillium                | -0.017729319 | 0.632248062 | 0.860729318 |
| g MGYG-HGUT-04236       | g unclassified Cordycipitaceae | -0.009055498 | 0.806905837 | 0.932679145 |
| g MGYG-HGUT-04236       | g unidentified                 | -0.020394112 | 0.581969979 | 0.838368792 |
| g UBA4871               | g Verticillium                 | 0.028713403  | 0.438247543 | 0.757272289 |
| g UBA4871               | g unclassified Tremellomycetes | 0.027780255  | 0.453282141 | 0.765162867 |
| g UBA4871               | g Candida                      | -0.019182945 | 0.604591132 | 0.849300857 |
| g UBA4871               | g Cladosporium                 | 0.04855597   | 0.189744531 | 0.579808439 |
| g UBA4871               | g Debaryomyces                 | -0.081611139 | 0.027354136 | 0.305416237 |
| g UBA4871               | g Aspergillus                  | -0.028189929 | 0.446646107 | 0.761832544 |
| g UBA4871               | g Kazachstania                 | -0.032947462 | 0.373724768 | 0.718484102 |
| g UBA4871               | g Malassezia                   | 0.050197147  | 0.175190503 | 0.570357274 |
| g UBA4871               | g unclassified Fungi           | 0.000899981  | 0.980620367 | 0.993007151 |
| g UBA4871               | g Mycosphaerella               | -0.04896568  | 0.186030538 | 0.577169451 |
| g UBA4871               | g Simplicillium                | 0.002526706  | 0.945628184 | 0.980291673 |
| g UBA4871               | g unclassified Cordycipitaceae | 0.038762716  | 0.295271251 | 0.664093599 |
| g UBA4871               | g unidentified                 | -0.068971904 | 0.062346587 | 0.41782874  |
| g MGYG-HGUT-03211       | g Verticillium                 | 0.021381517  | 0.563825302 | 0.828436454 |
| g MGYG-HGUT-03211       | g unclassified Tremellomycetes | 0.033583282  | 0.364568921 | 0.713891251 |
| g MGYG-HGUT-03211       | g Candida                      | -0.044472886 | 0.229770423 | 0.615065767 |
| g MGYG-HGUT-03211       | g Cladosporium                 | 0.053564608  | 0.147956504 | 0.543448708 |
| g MGYG-HGUT-03211       | g Debaryomyces                 | -0.140039628 | 0.000145571 | 0.01973912  |
| g MGYG-HGUT-03211       | g Aspergillus                  | 0.045580572  | 0.218362789 | 0.606327743 |
| g MGYG-HGUT-03211       | g Kazachstania                 | -0.036134905 | 0.329249559 | 0.684906396 |
| g MGYG-HGUT-03211       | g Malassezia                   | 0.022697809  | 0.540068336 | 0.815420595 |
| g MGYG-HGUT-03211       | g unclassified Fungi           | 0.086732853  | 0.019006412 | 0.267167825 |
| g MGYG-HGUT-03211       | g Mycosphaerella               | -0.086621162 | 0.01916153  | 0.268210728 |
| g MGYG-HGUT-03211       | g Simplicillium                | 0.005897018  | 0.873537878 | 0.95723287  |
| g MGYG-HGUT-03211       | g unclassified Cordycipitaceae | 0.05668073   | 0.125748137 | 0.512188907 |
| g MGYG-HGUT-03211       | g unidentified                 | 0.022134507  | 0.550173631 | 0.818853556 |
| g MGYG-HGUT-04106       | g Verticillium                 | 0.024252808  | 0.512662471 | 0.800618989 |
| g MGYG-HGUT-04106       | g unclassified Tremellomycetes | -0.048617871 | 0.189179933 | 0.579369719 |
| g MGYG-HGUT-04106       | g Candida                      | -0.031369875 | 0.397048263 | 0.732625333 |
| g MGYG-HGUT-04106       | g Cladosporium                 | 0.036495569  | 0.324441974 | 0.680794164 |
| g MGYG-HGUT-04106       | g Debaryomyces                 | -0.146112694 | 7.34E-05    | 0.01652586  |
| g MGYG-HGUT-04106       | g Aspergillus                  | 0.087860539  | 0.017500635 | 0.257532317 |
| g MGYG-HGUT-04106       | g Kazachstania                 | -0.028606949 | 0.439948105 | 0.758246834 |
| g MGYG-HGUT-04106       | g Malassezia                   | 0.044932165  | 0.224990175 | 0.612060698 |
| g MGYG-HGUT-04106       | g unclassified Fungi           | 0.047976338  | 0.195091573 | 0.584501423 |
| g MGYG-HGUT-04106       | g Mycosphaerella               | -0.049492745 | 0.181331959 | 0.575010893 |
| g MGYG-HGUT-04106       | g Simplicillium                | 0.004701457  | 0.899022302 | 0.965742873 |
| g MGYG-HGUT-04106       | g unclassified Cordycipitaceae | 0.043524496  | 0.239868539 | 0.623365954 |
| g MGYG-HGUT-04106       | g unidentified                 | 0.063841514  | 0.084547354 | 0.458565103 |
| g MGYG-HGUT-00456       | g Verticillium                 | 0.035925282  | 0.332064863 | 0.68778737  |
| g MGYG-HGUT-00456       | g unclassified Tremellomycetes | -0.006217507 | 0.866727447 | 0.955187445 |
| g MGYG-HGUT-00456       | g Candida                      | -0.021303211 | 0.565254277 | 0.829039606 |
| g MGYG-HGUT-00456       | g Cladosporium                 | 0.061605586  | 0.096040188 | 0.476752199 |
| g MGYG-HGUT-00456       | g Debaryomyces                 | -0.104694926 | 0.004602915 | 0.133082102 |
| g MGYG-HGUT-00456       | g Aspergillus                  | 0.033605618  | 0.364249834 | 0.713794767 |
| g MGYG-HGUT-00456       | g Kazachstania                 | 0.005188792  | 0.888620252 | 0.962573397 |



|                   |                                |              |             |             |
|-------------------|--------------------------------|--------------|-------------|-------------|
| g MGYG-HGUT-00456 | g Malassezia                   | 0.029857269  | 0.420214276 | 0.74604389  |
| g MGYG-HGUT-00456 | g unclassified Fungi           | 0.05292197   | 0.152887851 | 0.549327311 |
| g MGYG-HGUT-00456 | g Mycosphaerella               | -0.024229077 | 0.513075216 | 0.800908974 |
| g MGYG-HGUT-00456 | g Simplicillium                | -0.012872048 | 0.728260389 | 0.907012052 |
| g MGYG-HGUT-00456 | g unclassified Cordycipitaceae | 0.067445111  | 0.068383832 | 0.435926332 |
| g MGYG-HGUT-00456 | g unidentified                 | -0.015607954 | 0.673538996 | 0.882648874 |
| g MGYG-HGUT-04131 | g Verticillium                 | 0.033425271  | 0.366831119 | 0.715671969 |
| g MGYG-HGUT-04131 | g unclassified Tremellomycetes | -0.075603041 | 0.041002227 | 0.354153628 |
| g MGYG-HGUT-04131 | g Candida                      | -0.031762641 | 0.391161088 | 0.729890405 |
| g MGYG-HGUT-04131 | g Cladosporium                 | 0.012106099  | 0.74384595  | 0.909574751 |
| g MGYG-HGUT-04131 | g Debaryomyces                 | -0.159983614 | 1.39E-05    | 0.008626179 |
| g MGYG-HGUT-04131 | g Aspergillus                  | 0.053438126  | 0.148917371 | 0.544911018 |
| g MGYG-HGUT-04131 | g Kazachstania                 | -0.049440296 | 0.181795544 | 0.575010893 |
| g MGYG-HGUT-04131 | g Malassezia                   | 0.032284749  | 0.383417588 | 0.724263642 |
| g MGYG-HGUT-04131 | g unclassified Fungi           | 0.050892993  | 0.169277058 | 0.563866155 |
| g MGYG-HGUT-04131 | g Mycosphaerella               | -0.022295258 | 0.547280395 | 0.816368923 |
| g MGYG-HGUT-04131 | g Simplicillium                | -0.015684276 | 0.672035321 | 0.881783585 |
| g MGYG-HGUT-04131 | g unclassified Cordycipitaceae | 0.079310623  | 0.032030423 | 0.323266606 |
| g MGYG-HGUT-04131 | g unidentified                 | 0.055994689  | 0.130400348 | 0.517804933 |
| g CAG-964         | g Verticillium                 | 0.035857587  | 0.332977326 | 0.688465429 |
| g CAG-964         | g unclassified Tremellomycetes | -0.066435397 | 0.072633909 | 0.442493968 |
| g CAG-964         | g Candida                      | -0.027447483 | 0.458713115 | 0.767811165 |
| g CAG-964         | g Cladosporium                 | 0.013980682  | 0.705900563 | 0.899655517 |
| g CAG-964         | g Debaryomyces                 | -0.101338356 | 0.006101805 | 0.148686802 |
| g CAG-964         | g Aspergillus                  | 0.067065724  | 0.069956179 | 0.439536772 |
| g CAG-964         | g Kazachstania                 | -0.002200042 | 0.952648774 | 0.982738285 |
| g CAG-964         | g Malassezia                   | 0.037871529  | 0.306521836 | 0.670552593 |
| g CAG-964         | g unclassified Fungi           | 0.0724979    | 0.0500717   | 0.385192726 |
| g CAG-964         | g Mycosphaerella               | -0.035242305 | 0.341344757 | 0.694699556 |
| g CAG-964         | g Simplicillium                | -0.023567364 | 0.524653232 | 0.8071702   |
| g CAG-964         | g unclassified Cordycipitaceae | 0.033438126  | 0.36664676  | 0.715671969 |
| g CAG-964         | g unidentified                 | 0.010501193  | 0.776837424 | 0.920368352 |
| g MGYG-HGUT-03855 | g Verticillium                 | 0.01044694   | 0.7779601   | 0.920950194 |
| g MGYG-HGUT-03855 | g unclassified Tremellomycetes | -0.018276897 | 0.621766554 | 0.856123107 |
| g MGYG-HGUT-03855 | g Candida                      | -0.020631335 | 0.577585971 | 0.836262521 |
| g MGYG-HGUT-03855 | g Cladosporium                 | -0.007190977 | 0.846103592 | 0.947820248 |
| g MGYG-HGUT-03855 | g Debaryomyces                 | -0.081830689 | 0.026940255 | 0.304574546 |
| g MGYG-HGUT-03855 | g Aspergillus                  | 0.045865098  | 0.215499262 | 0.603186168 |
| g MGYG-HGUT-03855 | g Kazachstania                 | -0.030058358 | 0.417089641 | 0.744290485 |
| g MGYG-HGUT-03855 | g Malassezia                   | 0.022696942  | 0.540083815 | 0.815420595 |
| g MGYG-HGUT-03855 | g unclassified Fungi           | 0.014418787  | 0.697132641 | 0.895302916 |
| g MGYG-HGUT-03855 | g Mycosphaerella               | -0.006929751 | 0.851628193 | 0.949400054 |
| g MGYG-HGUT-03855 | g Simplicillium                | -0.011638637 | 0.75341008  | 0.911360936 |
| g MGYG-HGUT-03855 | g unclassified Cordycipitaceae | 0.038867252  | 0.293969888 | 0.662829664 |
| g MGYG-HGUT-03855 | g unidentified                 | -0.000590791 | 0.98727756  | 0.995079867 |
| g MGYG-HGUT-03055 | g Verticillium                 | -0.03995701  | 0.280632197 | 0.657094722 |
| g MGYG-HGUT-03055 | g unclassified Tremellomycetes | 0.014298169  | 0.699542651 | 0.896059159 |
| g MGYG-HGUT-03055 | g Candida                      | -0.045192164 | 0.222315702 | 0.608994242 |
| g MGYG-HGUT-03055 | g Cladosporium                 | -0.033589489 | 0.364480233 | 0.713891251 |
| g MGYG-HGUT-03055 | g Debaryomyces                 | -0.019625316 | 0.596283292 | 0.84549554  |
| g MGYG-HGUT-03055 | g Aspergillus                  | 0.017417182  | 0.638256196 | 0.86388896  |
| g MGYG-HGUT-03055 | g Kazachstania                 | -0.067586815 | 0.067804035 | 0.434755158 |
| g MGYG-HGUT-03055 | g Malassezia                   | -0.00541296  | 0.883841762 | 0.961531153 |
| g MGYG-HGUT-03055 | g unclassified Fungi           | 0.016249836  | 0.660933937 | 0.876375094 |
| g MGYG-HGUT-03055 | g Mycosphaerella               | -0.042371439 | 0.252561245 | 0.633802908 |
| g MGYG-HGUT-03055 | g Simplicillium                | -0.03096221  | 0.403214851 | 0.736936858 |
| g MGYG-HGUT-03055 | g unclassified Cordycipitaceae | -0.032532676 | 0.379773574 | 0.722533174 |
| g MGYG-HGUT-03055 | g unidentified                 | 0.025995894  | 0.482824429 | 0.780449413 |
| g MGYG-HGUT-04159 | g Verticillium                 | 0.05606993   | 0.129883707 | 0.517527876 |
| g MGYG-HGUT-04159 | g unclassified Tremellomycetes | -0.039450114 | 0.286784281 | 0.659118154 |
| g MGYG-HGUT-04159 | g Candida                      | -0.042628311 | 0.24969396  | 0.631737101 |
| g MGYG-HGUT-04159 | g Cladosporium                 | 0.009875845  | 0.789805727 | 0.926124865 |
| g MGYG-HGUT-04159 | g Debaryomyces                 | -0.167242058 | 5.47E-06    | 0.008626179 |
| g MGYG-HGUT-04159 | g Aspergillus                  | 0.039750949  | 0.283122237 | 0.657890287 |
| g MGYG-HGUT-04159 | g Kazachstania                 | -0.006227828 | 0.866508272 | 0.955045364 |
| g MGYG-HGUT-04159 | g Malassezia                   | 0.026727019  | 0.470595193 | 0.77374741  |
| g MGYG-HGUT-04159 | g unclassified Fungi           | 0.06178939   | 0.095050649 | 0.474527669 |
| g MGYG-HGUT-04159 | g Mycosphaerella               | -0.006611468 | 0.858369294 | 0.952142599 |
| g MGYG-HGUT-04159 | g Simplicillium                | -0.04992747  | 0.177523168 | 0.573253026 |
| g MGYG-HGUT-04159 | g unclassified Cordycipitaceae | 0.045856773  | 0.215582662 | 0.603186168 |
| g MGYG-HGUT-04159 | g unidentified                 | 0.019859787  | 0.591901006 | 0.843006984 |
| g MGYG-HGUT-04116 | g Verticillium                 | 0.061123146  | 0.098676665 | 0.477955684 |
| g MGYG-HGUT-04116 | g unclassified Tremellomycetes | -0.048127514 | 0.193686472 | 0.582802008 |
| g MGYG-HGUT-04116 | g Candida                      | -0.025122128 | 0.497662704 | 0.789663628 |
| g MGYG-HGUT-04116 | g Cladosporium                 | 0.047643787  | 0.198208666 | 0.58591995  |
| g MGYG-HGUT-04116 | g Debaryomyces                 | -0.150098917 | 4.61E-05    | 0.013389478 |
| g MGYG-HGUT-04116 | g Aspergillus                  | 0.087008032  | 0.018628905 | 0.264605468 |
| g MGYG-HGUT-04116 | g Kazachstania                 | -0.01833656  | 0.620629085 | 0.856123107 |

|                   |                                |              |              |             |
|-------------------|--------------------------------|--------------|--------------|-------------|
| g MGYG-HGUT-04116 | g Malassezia                   | 0.069780662  | 0.059331219  | 0.412336263 |
| g MGYG-HGUT-04116 | g unclassified Fungi           | 0.117823234  | 0.001416545  | 0.072766386 |
| g MGYG-HGUT-04116 | g Mycosphaerella               | -0.032290461 | 0.383333398  | 0.724263642 |
| g MGYG-HGUT-04116 | g Simplicillium                | -0.02222252  | 0.548588612  | 0.817643267 |
| g MGYG-HGUT-04116 | g unclassified Cordycipitaceae | 0.050444638  | 0.173069891  | 0.567004826 |
| g MGYG-HGUT-04116 | g unidentified                 | 0.03651055   | 0.324243275  | 0.680782211 |
| g MGYG-HGUT-03412 | g Verticillium                 | 0.027606977  | 0.456105575  | 0.766566482 |
| g MGYG-HGUT-03412 | g unclassified Tremellomycetes | -0.066229549 | 0.073526311  | 0.443882299 |
| g MGYG-HGUT-03412 | g Candida                      | -0.012019526 | 0.745614297  | 0.909574751 |
| g MGYG-HGUT-03412 | g Cladosporium                 | 0.032391976  | 0.381838968  | 0.723098466 |
| g MGYG-HGUT-03412 | g Debaryomyces                 | -0.151709423 | 3.81E-05     | 0.011524141 |
| g MGYG-HGUT-03412 | g Aspergillus                  | 0.080920032  | 0.028692901  | 0.31117391  |
| g MGYG-HGUT-03412 | g Kazachstania                 | -0.041369483 | 0.263963845  | 0.642129978 |
| g MGYG-HGUT-03412 | g Malassezia                   | 0.030110535  | 0.416281124  | 0.743976838 |
| g MGYG-HGUT-03412 | g unclassified Fungi           | 0.056652562  | 0.125936577  | 0.512276291 |
| g MGYG-HGUT-03412 | g Mycosphaerella               | -0.009470204 | 0.798249238  | 0.929569806 |
| g MGYG-HGUT-03412 | g Simplicillium                | -0.056133735 | 0.129446829  | 0.517298469 |
| g MGYG-HGUT-03412 | g unclassified Cordycipitaceae | 0.034359033  | 0.353589301  | 0.705388488 |
| g MGYG-HGUT-03412 | g unidentified                 | 0.029891654  | 0.419679005  | 0.745998926 |
| g MGYG-HGUT-02705 | g Verticillium                 | 0.02811411   | 0.447870066  | 0.762502994 |
| g MGYG-HGUT-02705 | g unclassified Tremellomycetes | 0.027339898  | 0.460476709  | 0.769075712 |
| g MGYG-HGUT-02705 | g Candida                      | -0.020135388 | 0.586768959  | 0.840897769 |
| g MGYG-HGUT-02705 | g Cladosporium                 | 0.030877331  | 0.404505943  | 0.737438672 |
| g MGYG-HGUT-02705 | g Debaryomyces                 | -0.127138129 | 0.000569912  | 0.045979793 |
| g MGYG-HGUT-02705 | g Aspergillus                  | 0.077444058  | 0.036311914  | 0.338067067 |
| g MGYG-HGUT-02705 | g Kazachstania                 | -0.030777046 | 0.406034552  | 0.738222664 |
| g MGYG-HGUT-02705 | g Malassezia                   | 0.074852058  | 0.043057539  | 0.361614982 |
| g MGYG-HGUT-02705 | g unclassified Fungi           | 0.068349865  | 0.064750922  | 0.423806055 |
| g MGYG-HGUT-02705 | g Mycosphaerella               | -0.023146259 | 0.532090247  | 0.811490628 |
| g MGYG-HGUT-02705 | g Simplicillium                | -0.028869994 | 0.435752948  | 0.755552629 |
| g MGYG-HGUT-02705 | g unclassified Cordycipitaceae | 0.056950749  | 0.123952867  | 0.508632924 |
| g MGYG-HGUT-02705 | g unidentified                 | 0.011895334  | 0.748153358  | 0.910244784 |
| g MGYG-HGUT-02694 | g Verticillium                 | 0.025949929  | 0.483598982  | 0.780693276 |
| g MGYG-HGUT-02694 | g unclassified Tremellomycetes | 0.050167867  | 0.175442655  | 0.570714472 |
| g MGYG-HGUT-02694 | g Candida                      | -0.045963779 | 0.2145112451 | 0.601936086 |
| g MGYG-HGUT-02694 | g Cladosporium                 | 0.082690543  | 0.025370838  | 0.296002437 |
| g MGYG-HGUT-02694 | g Debaryomyces                 | -0.098609536 | 0.007629296  | 0.168194189 |
| g MGYG-HGUT-02694 | g Aspergillus                  | 0.018090695  | 0.625323215  | 0.857478391 |
| g MGYG-HGUT-02694 | g Kazachstania                 | -0.003482458 | 0.925113603  | 0.974172444 |
| g MGYG-HGUT-02694 | g Malassezia                   | 0.0612945    | 0.09773371   | 0.477597322 |
| g MGYG-HGUT-02694 | g unclassified Fungi           | 0.013141342  | 0.722806938  | 0.905819874 |
| g MGYG-HGUT-02694 | g Mycosphaerella               | -0.046934394 | 0.204979182  | 0.594296482 |
| g MGYG-HGUT-02694 | g Simplicillium                | -0.045200962 | 0.2222256    | 0.608994242 |
| g MGYG-HGUT-02694 | g unclassified Cordycipitaceae | 0.057606533  | 0.119675873  | 0.503129929 |
| g MGYG-HGUT-02694 | g unidentified                 | -0.038417096 | 0.299601245  | 0.667308015 |
| g MGYG-HGUT-01860 | g Verticillium                 | 0.024115285  | 0.515056737  | 0.802518289 |
| g MGYG-HGUT-01860 | g unclassified Tremellomycetes | -0.061223832 | 0.098121718  | 0.477873659 |
| g MGYG-HGUT-01860 | g Candida                      | -0.027748612 | 0.453797002  | 0.765539151 |
| g MGYG-HGUT-01860 | g Cladosporium                 | 0.023153451  | 0.531962774  | 0.811490628 |
| g MGYG-HGUT-01860 | g Debaryomyces                 | -0.14475177  | 8.58E-05     | 0.018295299 |
| g MGYG-HGUT-01860 | g Aspergillus                  | 0.077463912  | 0.036263933  | 0.338067067 |
| g MGYG-HGUT-01860 | g Kazachstania                 | -0.057272865 | 0.121837397  | 0.506577845 |
| g MGYG-HGUT-01860 | g Malassezia                   | 0.03621323   | 0.328201607  | 0.684020192 |
| g MGYG-HGUT-01860 | g unclassified Fungi           | 0.06191103   | 0.094400269  | 0.473498111 |
| g MGYG-HGUT-01860 | g Mycosphaerella               | 0.043721233  | 0.237748497  | 0.622281234 |
| g MGYG-HGUT-01860 | g Simplicillium                | -0.03208841  | 0.386318488  | 0.726372112 |
| g MGYG-HGUT-01860 | g unclassified Cordycipitaceae | 0.038764134  | 0.295253569  | 0.664093599 |
| g MGYG-HGUT-01860 | g unidentified                 | 0.071531744  | 0.053215041  | 0.396006727 |
| g MGYG-HGUT-04049 | g Verticillium                 | 0.026882602  | 0.468015008  | 0.773111449 |
| g MGYG-HGUT-04049 | g unclassified Tremellomycetes | -0.051764927 | 0.16207966   | 0.559767285 |
| g MGYG-HGUT-04049 | g Candida                      | -0.033105505 | 0.371435784  | 0.717854628 |
| g MGYG-HGUT-04049 | g Cladosporium                 | 0.03450732   | 0.351514517  | 0.703328048 |
| g MGYG-HGUT-04049 | g Debaryomyces                 | -0.108860838 | 0.003208761  | 0.111269104 |
| g MGYG-HGUT-04049 | g Aspergillus                  | 0.044240919  | 0.23221199   | 0.617559003 |
| g MGYG-HGUT-04049 | g Kazachstania                 | -0.011091381 | 0.764654839  | 0.915647562 |
| g MGYG-HGUT-04049 | g Malassezia                   | 0.039093757  | 0.291163319  | 0.660774558 |
| g MGYG-HGUT-04049 | g unclassified Fungi           | 0.039728759  | 0.283391271  | 0.658002559 |
| g MGYG-HGUT-04049 | g Mycosphaerella               | -0.013162046 | 0.722388232  | 0.905687198 |
| g MGYG-HGUT-04049 | g Simplicillium                | -0.058098132 | 0.116546026  | 0.500117618 |
| g MGYG-HGUT-04049 | g unclassified Cordycipitaceae | 0.030260666  | 0.413959896  | 0.742839345 |
| g MGYG-HGUT-04049 | g unidentified                 | 0.038505285  | 0.298492405  | 0.666240589 |
| g MGYG-HGUT-04279 | g Verticillium                 | 0.077131336  | 0.037074862  | 0.340856814 |
| g MGYG-HGUT-04279 | g unclassified Tremellomycetes | -0.06159132  | 0.096117334  | 0.476752199 |
| g MGYG-HGUT-04279 | g Candida                      | -0.018793558 | 0.611946515  | 0.852055003 |
| g MGYG-HGUT-04279 | g Cladosporium                 | 0.017907992  | 0.628819717  | 0.859818244 |
| g MGYG-HGUT-04279 | g Debaryomyces                 | -0.144338934 | 8.99E-05     | 0.018295299 |
| g MGYG-HGUT-04279 | g Aspergillus                  | 0.0889986    | 0.016087868  | 0.248402621 |
| g MGYG-HGUT-04279 | g Kazachstania                 | -0.01750797  | 0.636506201  | 0.863367624 |

|                   |                                |              |             |             |
|-------------------|--------------------------------|--------------|-------------|-------------|
| g MGYG-HGUT-04279 | g Malassezia                   | 0.046822908  | 0.20605829  | 0.595517977 |
| g MGYG-HGUT-04279 | g unclassified Fungi           | 0.106828793  | 0.003832036 | 0.121638936 |
| g MGYG-HGUT-04279 | g Mycosphaerella               | 0.03510956   | 0.343167456 | 0.695270538 |
| g MGYG-HGUT-04279 | g Simplicillium                | -0.046094827 | 0.213207004 | 0.600680647 |
| g MGYG-HGUT-04279 | g unclassified Cordycipitaceae | 0.084240957  | 0.022739933 | 0.283321191 |
| g MGYG-HGUT-04279 | g unidentified                 | 0.062690331  | 0.090317591 | 0.468756273 |
| g MGYG-HGUT-00505 | g Verticillium                 | 0.05724894   | 0.121993552 | 0.506577845 |
| g MGYG-HGUT-00505 | g unclassified Tremellomycetes | -0.055779339 | 0.13188785  | 0.519596883 |
| g MGYG-HGUT-00505 | g Candida                      | -0.010768202 | 0.771318859 | 0.917834971 |
| g MGYG-HGUT-00505 | g Cladosporium                 | 0.003954751  | 0.914993601 | 0.97135264  |
| g MGYG-HGUT-00505 | g Debaryomyces                 | -0.028147139 | 0.447336635 | 0.762502994 |
| g MGYG-HGUT-00505 | g Aspergillus                  | 0.059023424  | 0.110829396 | 0.49443367  |
| g MGYG-HGUT-00505 | g Kazachstania                 | -0.031630896 | 0.393129903 | 0.730757316 |
| g MGYG-HGUT-00505 | g Malassezia                   | 0.03778146   | 0.307674454 | 0.670833121 |
| g MGYG-HGUT-00505 | g unclassified Fungi           | 0.052106598  | 0.159323067 | 0.555870984 |
| g MGYG-HGUT-00505 | g Mycosphaerella               | -0.03108987  | 0.401277662 | 0.735790931 |
| g MGYG-HGUT-00505 | g Simplicillium                | -0.016650458 | 0.653114728 | 0.872413692 |
| g MGYG-HGUT-00505 | g unclassified Cordycipitaceae | 0.028039732  | 0.449072624 | 0.762723397 |
| g MGYG-HGUT-00505 | g unidentified                 | 0.000586545  | 0.987368985 | 0.995079867 |
| g MGYG-HGUT-00937 | g Verticillium                 | 0.094332778  | 0.010716676 | 0.200006823 |
| g MGYG-HGUT-00937 | g unclassified Tremellomycetes | -0.014072916 | 0.704051378 | 0.898380764 |
| g MGYG-HGUT-00937 | g Candida                      | -0.085155762 | 0.021301309 | 0.278255687 |
| g MGYG-HGUT-00937 | g Cladosporium                 | 0.013556917  | 0.714418751 | 0.902925307 |
| g MGYG-HGUT-00937 | g Debaryomyces                 | -0.098688327 | 0.007580788 | 0.168194189 |
| g MGYG-HGUT-00937 | g Aspergillus                  | 0.014943764  | 0.686679131 | 0.890058619 |
| g MGYG-HGUT-00937 | g Kazachstania                 | -0.038294682 | 0.301144957 | 0.667386268 |
| g MGYG-HGUT-00937 | g Malassezia                   | 0.008298646  | 0.822764709 | 0.938379371 |
| g MGYG-HGUT-00937 | g unclassified Fungi           | 0.030462082  | 0.410857777 | 0.742054446 |
| g MGYG-HGUT-00937 | g Mycosphaerella               | -0.015353608 | 0.67855943  | 0.885522992 |
| g MGYG-HGUT-00937 | g Simplicillium                | -0.015613973 | 0.673420367 | 0.882602716 |
| g MGYG-HGUT-00937 | g unclassified Cordycipitaceae | 0.083020567  | 0.02478979  | 0.293101188 |
| g MGYG-HGUT-00937 | g unidentified                 | 0.001537425  | 0.966900264 | 0.988470889 |
| g MGYG-HGUT-04075 | g Verticillium                 | 0.057768866  | 0.118635166 | 0.502487018 |
| g MGYG-HGUT-04075 | g unclassified Tremellomycetes | -0.068994272 | 0.062261522 | 0.417523086 |
| g MGYG-HGUT-04075 | g Candida                      | -0.000348102 | 0.992503558 | 0.996941403 |
| g MGYG-HGUT-04075 | g Cladosporium                 | 0.018124308  | 0.624679794 | 0.8570016   |
| g MGYG-HGUT-04075 | g Debaryomyces                 | -0.129847884 | 0.000432195 | 0.037797453 |
| g MGYG-HGUT-04075 | g Aspergillus                  | 0.069019611  | 0.062165273 | 0.417170577 |
| g MGYG-HGUT-04075 | g Kazachstania                 | -0.031792164 | 0.390720718 | 0.729773041 |
| g MGYG-HGUT-04075 | g Malassezia                   | 0.024078067  | 0.515705699 | 0.802695096 |
| g MGYG-HGUT-04075 | g unclassified Fungi           | 0.142796165  | 0.000107044 | 0.018409489 |
| g MGYG-HGUT-04075 | g Mycosphaerella               | -0.016995054 | 0.646419262 | 0.868120757 |
| g MGYG-HGUT-04075 | g Simplicillium                | -0.05146653  | 0.164516379 | 0.561723687 |
| g MGYG-HGUT-04075 | g unclassified Cordycipitaceae | 0.037851225  | 0.306781416 | 0.670678839 |
| g MGYG-HGUT-04075 | g unidentified                 | 0.045367155  | 0.220528499 | 0.607083027 |
| g UBA6857         | g Verticillium                 | 0.004772476  | 0.897505308 | 0.965250198 |
| g UBA6857         | g unclassified Tremellomycetes | -0.043456882 | 0.240600203 | 0.624180277 |
| g UBA6857         | g Candida                      | -0.035785825 | 0.333946383 | 0.689781716 |
| g UBA6857         | g Cladosporium                 | 0.03505777   | 0.343880264 | 0.695739224 |
| g UBA6857         | g Debaryomyces                 | -0.053284172 | 0.150093339 | 0.547119433 |
| g UBA6857         | g Aspergillus                  | 0.062044513  | 0.093690675 | 0.47288973  |
| g UBA6857         | g Kazachstania                 | -0.006213072 | 0.866821614 | 0.955191744 |
| g UBA6857         | g Malassezia                   | 0.015955998  | 0.6666926   | 0.879421986 |
| g UBA6857         | g unclassified Fungi           | 0.007780522  | 0.833663573 | 0.941798648 |
| g UBA6857         | g Mycosphaerella               | 0.006079676  | 0.869655195 | 0.955405149 |
| g UBA6857         | g Simplicillium                | 0.030628357  | 0.408307296 | 0.739701978 |
| g UBA6857         | g unclassified Cordycipitaceae | 0.027274884  | 0.461544287 | 0.769075712 |
| g UBA6857         | g unidentified                 | 0.064228054  | 0.08267796  | 0.455217912 |
| g MGYG-HGUT-02709 | g Verticillium                 | 0.026064394  | 0.481671396 | 0.780189053 |
| g MGYG-HGUT-02709 | g unclassified Tremellomycetes | 0.014355858  | 0.698389613 | 0.895302916 |
| g MGYG-HGUT-02709 | g Candida                      | -0.008052947 | 0.827928946 | 0.939989934 |
| g MGYG-HGUT-02709 | g Cladosporium                 | 0.088645772  | 0.016514764 | 0.250706068 |
| g MGYG-HGUT-02709 | g Debaryomyces                 | -0.098369063 | 0.007779067 | 0.169457519 |
| g MGYG-HGUT-02709 | g Aspergillus                  | 0.023099226  | 0.532924171 | 0.811490628 |
| g MGYG-HGUT-02709 | g Kazachstania                 | 0.038373241  | 0.300153676 | 0.667386268 |
| g MGYG-HGUT-02709 | g Malassezia                   | 0.058189788  | 0.115969642 | 0.499263933 |
| g MGYG-HGUT-02709 | g unclassified Fungi           | 0.05857191   | 0.11359071  | 0.497112033 |
| g MGYG-HGUT-02709 | g Mycosphaerella               | -0.04953461  | 0.180962549 | 0.575010893 |
| g MGYG-HGUT-02709 | g Simplicillium                | 0.011108395  | 0.764304478 | 0.915519623 |
| g MGYG-HGUT-02709 | g unclassified Cordycipitaceae | 0.102366395  | 0.005601752 | 0.144579861 |
| g MGYG-HGUT-02709 | g unidentified                 | -0.032810476 | 0.375715825 | 0.719866895 |
| g MGYG-HGUT-04496 | g Verticillium                 | 0.035063835  | 0.343796736 | 0.695739224 |
| g MGYG-HGUT-04496 | g unclassified Tremellomycetes | 0.005809496  | 0.875399383 | 0.957673757 |
| g MGYG-HGUT-04496 | g Candida                      | -0.083688044 | 0.023649689 | 0.286686945 |
| g MGYG-HGUT-04496 | g Cladosporium                 | 0.02158705   | 0.560082887 | 0.826264758 |
| g MGYG-HGUT-04496 | g Debaryomyces                 | -0.031051113 | 0.401865195 | 0.736155635 |
| g MGYG-HGUT-04496 | g Aspergillus                  | -0.029289494 | 0.42911042  | 0.751274884 |
| g MGYG-HGUT-04496 | g Kazachstania                 | 0.011690547  | 0.752346122 | 0.911011175 |

|                   |                                |              |             |             |
|-------------------|--------------------------------|--------------|-------------|-------------|
| g MGYG-HGUT-04496 | g Malassezia                   | 0.091259845  | 0.013574764 | 0.225653879 |
| g MGYG-HGUT-04496 | g unclassified Fungi           | -0.011663563 | 0.752899139 | 0.911258836 |
| g MGYG-HGUT-04496 | g Mycosphaerella               | 0.028770859  | 0.437331288 | 0.756553815 |
| g MGYG-HGUT-04496 | g Simplicillium                | 0.020917043  | 0.572326619 | 0.833291179 |
| g MGYG-HGUT-04496 | g unclassified Cordycipitaceae | 0.070042669  | 0.058380644 | 0.409128457 |
| g MGYG-HGUT-04496 | g unidentified                 | 0.004532664  | 0.902629291 | 0.966636316 |
| g An172           | g Verticillium                 | 0.08423546   | 0.022748826 | 0.283321191 |
| g An172           | g unclassified Tremellomycetes | -0.064671969 | 0.080572489 | 0.451598557 |
| g An172           | g Candida                      | -0.037700611 | 0.308711519 | 0.671651258 |
| g An172           | g Cladosporium                 | -0.001921637 | 0.958635112 | 0.984847119 |
| g An172           | g Debaryomyces                 | -0.048586519 | 0.189465741 | 0.579458518 |
| g An172           | g Aspergillus                  | 0.026037503  | 0.482123867 | 0.780189053 |
| g An172           | g Kazachstania                 | -0.044061503 | 0.234113002 | 0.618418319 |
| g An172           | g Malassezia                   | 0.024420229  | 0.50975553  | 0.798892628 |
| g An172           | g unclassified Fungi           | 0.058592216  | 0.113465371 | 0.496972931 |
| g An172           | g Mycosphaerella               | -0.043899056 | 0.23584368  | 0.619698732 |
| g An172           | g Simplicillium                | 0.005562596  | 0.880654357 | 0.959750565 |
| g An172           | g unclassified Cordycipitaceae | 0.093876006  | 0.011104504 | 0.204069724 |
| g An172           | g unidentified                 | -0.028487568 | 0.441859648 | 0.759179335 |
| g MGYG-HGUT-04229 | g Verticillium                 | 0.023420497  | 0.527240957 | 0.80894067  |
| g MGYG-HGUT-04229 | g unclassified Tremellomycetes | -0.03619013  | 0.328510455 | 0.684175878 |
| g MGYG-HGUT-04229 | g Candida                      | -0.023385889 | 0.527851682 | 0.808944748 |
| g MGYG-HGUT-04229 | g Cladosporium                 | 0.018939743  | 0.609180513 | 0.851291399 |
| g MGYG-HGUT-04229 | g Debaryomyces                 | -0.125259816 | 0.000688213 | 0.047912298 |
| g MGYG-HGUT-04229 | g Aspergillus                  | 0.034574259  | 0.350580451 | 0.702774112 |
| g MGYG-HGUT-04229 | g Kazachstania                 | 0.01775272   | 0.631798593 | 0.860560267 |
| g MGYG-HGUT-04229 | g Malassezia                   | -0.01405472  | 0.704416044 | 0.89859806  |
| g MGYG-HGUT-04229 | g unclassified Fungi           | 0.036926424  | 0.318758862 | 0.676514899 |
| g MGYG-HGUT-04229 | g Mycosphaerella               | -0.04535584  | 0.220643746 | 0.607085835 |
| g MGYG-HGUT-04229 | g Simplicillium                | -0.023936985 | 0.518169539 | 0.803768376 |
| g MGYG-HGUT-04229 | g unclassified Cordycipitaceae | 0.022352108  | 0.546259    | 0.816307334 |
| g MGYG-HGUT-04229 | g unidentified                 | 0.00643822   | 0.862042977 | 0.953015155 |
| g UBA1227         | g Verticillium                 | 0.041582359  | 0.261512078 | 0.639461577 |
| g UBA1227         | g unclassified Tremellomycetes | -0.050002172 | 0.176874714 | 0.572556815 |
| g UBA1227         | g Candida                      | -0.025503907 | 0.491149702 | 0.785334866 |
| g UBA1227         | g Cladosporium                 | 0.071280302  | 0.054059552 | 0.397628223 |
| g UBA1227         | g Debaryomyces                 | -0.119888481 | 0.00116383  | 0.065064446 |
| g UBA1227         | g Aspergillus                  | 0.051323483  | 0.165694226 | 0.562504371 |
| g UBA1227         | g Kazachstania                 | -0.029427116 | 0.426944117 | 0.74986268  |
| g UBA1227         | g Malassezia                   | 0.032938769  | 0.373850937 | 0.718484102 |
| g UBA1227         | g unclassified Fungi           | 0.065927221  | 0.074853179 | 0.444519981 |
| g UBA1227         | g Mycosphaerella               | -0.020356429 | 0.582667799 | 0.838636621 |
| g UBA1227         | g Simplicillium                | 0.018235618  | 0.622554083 | 0.856123107 |
| g UBA1227         | g unclassified Cordycipitaceae | 0.070144717  | 0.058013843 | 0.407963088 |
| g UBA1227         | g unidentified                 | 0.037912451  | 0.305999096 | 0.670434717 |
| g CAG-964 A       | g Verticillium                 | 0.070121063  | 0.058098693 | 0.407963088 |
| g CAG-964 A       | g unclassified Tremellomycetes | -0.051804432 | 0.161759114 | 0.559756359 |
| g CAG-964 A       | g Candida                      | -0.036005152 | 0.33099036  | 0.686907235 |
| g CAG-964 A       | g Cladosporium                 | 0.045119715  | 0.223058653 | 0.61039738  |
| g CAG-964 A       | g Debaryomyces                 | -0.103282493 | 0.005187572 | 0.140037979 |
| g CAG-964 A       | g Aspergillus                  | 0.052409831  | 0.156906361 | 0.554071089 |
| g CAG-964 A       | g Kazachstania                 | -0.037929362 | 0.305783239 | 0.670353891 |
| g CAG-964 A       | g Malassezia                   | 0.058760907  | 0.112428356 | 0.495410348 |
| g CAG-964 A       | g unclassified Fungi           | 0.023231672  | 0.530577482 | 0.811128912 |
| g CAG-964 A       | g Mycosphaerella               | -0.001016546 | 0.978110919 | 0.991604689 |
| g CAG-964 A       | g Simplicillium                | -0.002224163 | 0.952130244 | 0.982634054 |
| g CAG-964 A       | g unclassified Cordycipitaceae | 0.084460812  | 0.022386709 | 0.283321191 |
| g CAG-964 A       | g unidentified                 | 0.014354124  | 0.698424265 | 0.895302916 |
| g MGYG-HGUT-02805 | g Verticillium                 | 0.03852546   | 0.298239116 | 0.666157944 |
| g MGYG-HGUT-02805 | g unclassified Tremellomycetes | -0.089515421 | 0.015480032 | 0.244127725 |
| g MGYG-HGUT-02805 | g Candida                      | -0.007393577 | 0.84182405  | 0.945968153 |
| g MGYG-HGUT-02805 | g Cladosporium                 | 0.046619183  | 0.208040835 | 0.597903264 |
| g MGYG-HGUT-02805 | g Debaryomyces                 | -0.114820793 | 0.001874755 | 0.084780602 |
| g MGYG-HGUT-02805 | g Aspergillus                  | 0.051661563  | 0.162920644 | 0.560736054 |
| g MGYG-HGUT-02805 | g Kazachstania                 | -0.033034331 | 0.372465547 | 0.718177427 |
| g MGYG-HGUT-02805 | g Malassezia                   | 0.011486889  | 0.756523014 | 0.912206761 |
| g MGYG-HGUT-02805 | g unclassified Fungi           | 0.072915212  | 0.048762849 | 0.380537217 |
| g MGYG-HGUT-02805 | g Mycosphaerella               | -0.034506133 | 0.351531095 | 0.703328048 |
| g MGYG-HGUT-02805 | g Simplicillium                | -0.004177316 | 0.910229268 | 0.969320838 |
| g MGYG-HGUT-02805 | g unclassified Cordycipitaceae | 0.083800471  | 0.023462193 | 0.285827384 |
| g MGYG-HGUT-02805 | g unidentified                 | 0.011308892  | 0.760179437 | 0.914048031 |
| g MGYG-HGUT-01116 | g Verticillium                 | 0.026807658  | 0.469256907 | 0.77312422  |
| g MGYG-HGUT-01116 | g unclassified Tremellomycetes | -0.038343491 | 0.300528819 | 0.667386268 |
| g MGYG-HGUT-01116 | g Candida                      | -0.018753902 | 0.61269783  | 0.852876669 |
| g MGYG-HGUT-01116 | g Cladosporium                 | 0.031735129  | 0.391571738 | 0.730055982 |
| g MGYG-HGUT-01116 | g Debaryomyces                 | -0.119053048 | 0.001260581 | 0.06826367  |
| g MGYG-HGUT-01116 | g Aspergillus                  | 0.088889482  | 0.016218847 | 0.249725676 |
| g MGYG-HGUT-01116 | g Kazachstania                 | -0.04152921  | 0.262122733 | 0.640201835 |



|                   |                                |              |             |             |
|-------------------|--------------------------------|--------------|-------------|-------------|
| g MGYG-HGUT-01116 | g Malassezia                   | 0.01937863   | 0.600909717 | 0.847052968 |
| g MGYG-HGUT-01116 | g unclassified Fungi           | 0.062264321  | 0.092531482 | 0.471664958 |
| g MGYG-HGUT-01116 | g Mycosphaerella               | -0.003789915 | 0.918524113 | 0.971787859 |
| g MGYG-HGUT-01116 | g Simplicillium                | 0.001750451  | 0.962317162 | 0.986228955 |
| g MGYG-HGUT-01116 | g unclassified Cordycipitaceae | 0.064218476  | 0.082723875 | 0.455217912 |
| g MGYG-HGUT-01116 | g unidentified                 | 0.039043572  | 0.291783585 | 0.660859538 |
| g MGYG-HGUT-02031 | g Verticillium                 | 0.037954845  | 0.30545817  | 0.670057703 |
| g MGYG-HGUT-02031 | g unclassified Tremellomycetes | -0.050662411 | 0.171219808 | 0.565255978 |
| g MGYG-HGUT-02031 | g Candida                      | -0.01297402  | 0.726193742 | 0.907006477 |
| g MGYG-HGUT-02031 | g Cladosporium                 | 0.000620882  | 0.98662963  | 0.994713676 |
| g MGYG-HGUT-02031 | g Debaryomyces                 | -0.102806273 | 0.005399299 | 0.141484151 |
| g MGYG-HGUT-02031 | g Aspergillus                  | 0.053144346  | 0.151167504 | 0.548001221 |
| g MGYG-HGUT-02031 | g Kazachstania                 | -0.059639883 | 0.107145057 | 0.488444035 |
| g MGYG-HGUT-02031 | g Malassezia                   | 0.049065982  | 0.185129535 | 0.576342405 |
| g MGYG-HGUT-02031 | g unclassified Fungi           | 0.061086632  | 0.098878532 | 0.47808105  |
| g MGYG-HGUT-02031 | g Mycosphaerella               | -0.02681469  | 0.469140292 | 0.77312422  |
| g MGYG-HGUT-02031 | g Simplicillium                | -0.01438659  | 0.697775656 | 0.895302916 |
| g MGYG-HGUT-02031 | g unclassified Cordycipitaceae | 0.045980027  | 0.214350285 | 0.601936086 |
| g MGYG-HGUT-02031 | g unidentified                 | 0.049741155  | 0.179148204 | 0.574257008 |
| g MGYG-HGUT-01125 | g Verticillium                 | 0.049061924  | 0.18516593  | 0.576342405 |
| g MGYG-HGUT-01125 | g unclassified Tremellomycetes | -0.062953785 | 0.088969892 | 0.465955266 |
| g MGYG-HGUT-01125 | g Candida                      | -0.037232538 | 0.314760879 | 0.674934066 |
| g MGYG-HGUT-01125 | g Cladosporium                 | 0.002261627  | 0.951324909 | 0.982634054 |
| g MGYG-HGUT-01125 | g Debaryomyces                 | -0.12732521  | 0.000559227 | 0.045521067 |
| g MGYG-HGUT-01125 | g Aspergillus                  | -0.009889772 | 0.789516272 | 0.92612409  |
| g MGYG-HGUT-01125 | g Kazachstania                 | 0.003993291  | 0.914168377 | 0.971160503 |
| g MGYG-HGUT-01125 | g Malassezia                   | 0.002954988  | 0.936430138 | 0.977345273 |
| g MGYG-HGUT-01125 | g unclassified Fungi           | -0.009749536 | 0.792432284 | 0.926965257 |
| g MGYG-HGUT-01125 | g Mycosphaerella               | -0.010345658 | 0.78005722  | 0.921371303 |
| g MGYG-HGUT-01125 | g Simplicillium                | 0.021891703  | 0.554557861 | 0.821334564 |
| g MGYG-HGUT-01125 | g unclassified Cordycipitaceae | 0.030434838  | 0.411276571 | 0.74205734  |
| g MGYG-HGUT-01125 | g unidentified                 | 0.022656704  | 0.5408026   | 0.815420595 |
| g MS4             | g Verticillium                 | 0.006771869  | 0.85497074  | 0.950427981 |
| g MS4             | g unclassified Tremellomycetes | -0.012643407 | 0.732901388 | 0.907315107 |
| g MS4             | g Candida                      | -0.019835526 | 0.592353755 | 0.843305185 |
| g MS4             | g Cladosporium                 | 0.026585853  | 0.472943042 | 0.775069559 |
| g MS4             | g Debaryomyces                 | -0.137848731 | 0.000185121 | 0.022444453 |
| g MS4             | g Aspergillus                  | 0.049105695  | 0.184773685 | 0.576342405 |
| g MS4             | g Kazachstania                 | -0.003263343 | 0.929812861 | 0.975279568 |
| g MS4             | g Malassezia                   | 0.018535299  | 0.61684663  | 0.854604745 |
| g MS4             | g unclassified Fungi           | 0.026132339  | 0.480529182 | 0.780189053 |
| g MS4             | g Mycosphaerella               | -0.047555315 | 0.199044032 | 0.586641865 |
| g MS4             | g Simplicillium                | -0.021139869 | 0.568240629 | 0.83054176  |
| g MS4             | g unclassified Cordycipitaceae | 0.055797289  | 0.131763361 | 0.519493252 |
| g MS4             | g unidentified                 | 0.02063205   | 0.57757278  | 0.836262521 |
| g DTU089 A        | g Verticillium                 | 0.036874812  | 0.319436189 | 0.677138171 |
| g DTU089 A        | g unclassified Tremellomycetes | -0.086468492 | 0.019375347 | 0.268956611 |
| g DTU089 A        | g Candida                      | -0.038322686 | 0.300791347 | 0.667386268 |
| g DTU089 A        | g Cladosporium                 | 0.002129808  | 0.954158724 | 0.983140463 |
| g DTU089 A        | g Debaryomyces                 | -0.110906384 | 0.002675842 | 0.098661168 |
| g DTU089 A        | g Aspergillus                  | 0.064155645  | 0.083025578 | 0.435435557 |
| g DTU089 A        | g Kazachstania                 | -0.049939252 | 0.177420782 | 0.573097288 |
| g DTU089 A        | g Malassezia                   | 0.030847709  | 0.404957109 | 0.737438672 |
| g DTU089 A        | g unclassified Fungi           | 0.073061402  | 0.048311174 | 0.378604998 |
| g DTU089 A        | g Mycosphaerella               | 0.005685213  | 0.878043925 | 0.958574313 |
| g DTU089 A        | g Simplicillium                | 0.009932163  | 0.788635371 | 0.925511755 |
| g DTU089 A        | g unclassified Cordycipitaceae | 0.042003831  | 0.256704305 | 0.636617051 |
| g DTU089 A        | g unidentified                 | 0.046617063  | 0.208061539 | 0.597903264 |
| g MGYG-HGUT-03236 | g Verticillium                 | 0.050760495  | 0.17039138  | 0.564916697 |
| g MGYG-HGUT-03236 | g unclassified Tremellomycetes | -0.046518636 | 0.209024382 | 0.598168571 |
| g MGYG-HGUT-03236 | g Candida                      | -0.039461371 | 0.286646686 | 0.659118154 |
| g MGYG-HGUT-03236 | g Cladosporium                 | 0.056990374  | 0.123691103 | 0.508632924 |
| g MGYG-HGUT-03236 | g Debaryomyces                 | -0.126926228 | 0.000582243 | 0.045979793 |
| g MGYG-HGUT-03236 | g Aspergillus                  | 0.030326562  | 0.412943483 | 0.742811081 |
| g MGYG-HGUT-03236 | g Kazachstania                 | 0.008657807  | 0.815229525 | 0.934957602 |
| g MGYG-HGUT-03236 | g Malassezia                   | 0.03964887   | 0.284361279 | 0.658002559 |
| g MGYG-HGUT-03236 | g unclassified Fungi           | 0.042938423  | 0.246262749 | 0.629434951 |
| g MGYG-HGUT-03236 | g Mycosphaerella               | 0.036524714  | 0.324055488 | 0.680696206 |
| g MGYG-HGUT-03236 | g Simplicillium                | 0.002928024  | 0.937008993 | 0.977563755 |
| g MGYG-HGUT-03236 | g unclassified Cordycipitaceae | 0.066097019  | 0.074105582 | 0.444193078 |
| g MGYG-HGUT-03236 | g unidentified                 | 0.020440534  | 0.581110847 | 0.837881654 |
| g MGYG-HGUT-01654 | g Verticillium                 | 0.038558011  | 0.297830756 | 0.666157944 |
| g MGYG-HGUT-01654 | g unclassified Tremellomycetes | -0.014829464 | 0.688950111 | 0.891576094 |
| g MGYG-HGUT-01654 | g Candida                      | -0.026789344 | 0.469560665 | 0.77312758  |
| g MGYG-HGUT-01654 | g Cladosporium                 | 0.104839235  | 0.004546667 | 0.132178106 |
| g MGYG-HGUT-01654 | g Debaryomyces                 | -0.124482692 | 0.000743517 | 0.050435245 |
| g MGYG-HGUT-01654 | g Aspergillus                  | 0.06844486   | 0.064378878 | 0.423004068 |
| g MGYG-HGUT-01654 | g Kazachstania                 | -0.013217161 | 0.721274042 | 0.905336886 |



|                   |                                |              |             |             |
|-------------------|--------------------------------|--------------|-------------|-------------|
| g MGYG-HGUT-01654 | g Malassezia                   | 0.06160027   | 0.09606893  | 0.476752199 |
| g MGYG-HGUT-01654 | g unclassified Fungi           | 0.070958094  | 0.055158031 | 0.400940701 |
| g MGYG-HGUT-01654 | g Mycosphaerella               | -0.016652563 | 0.653073746 | 0.872413692 |
| g MGYG-HGUT-01654 | g Simplicillium                | -0.018760752 | 0.61256802  | 0.852808155 |
| g MGYG-HGUT-01654 | g unclassified Cordycipitaceae | 0.073140424  | 0.048068485 | 0.378604998 |
| g MGYG-HGUT-01654 | g unidentified                 | -0.031356258 | 0.397253325 | 0.732740506 |
| g MGYG-HGUT-03887 | g Verticillium                 | 0.079261843  | 0.032136559 | 0.323567143 |
| g MGYG-HGUT-03887 | g unclassified Tremellomycetes | -0.00908221  | 0.806347533 | 0.932387299 |
| g MGYG-HGUT-03887 | g Candida                      | -0.021891158 | 0.554567706 | 0.821334564 |
| g MGYG-HGUT-03887 | g Cladosporium                 | 0.000233188  | 0.994978205 | 0.997617905 |
| g MGYG-HGUT-03887 | g Debaryomyces                 | -0.003974924 | 0.914561634 | 0.97128575  |
| g MGYG-HGUT-03887 | g Aspergillus                  | -0.009275768 | 0.802304905 | 0.930663955 |
| g MGYG-HGUT-03887 | g Kazachstania                 | -0.054677498 | 0.13970481  | 0.533896229 |
| g MGYG-HGUT-03887 | g Malassezia                   | 0.040800942  | 0.270589288 | 0.64848037  |
| g MGYG-HGUT-03887 | g unclassified Fungi           | 0.054206323  | 0.143154203 | 0.538440191 |
| g MGYG-HGUT-03887 | g Mycosphaerella               | 0.035635545  | 0.335981581 | 0.691245179 |
| g MGYG-HGUT-03887 | g Simplicillium                | 0.022133922  | 0.55018416  | 0.818853556 |
| g MGYG-HGUT-03887 | g unclassified Cordycipitaceae | 0.081515759  | 0.02753564  | 0.306073677 |
| g MGYG-HGUT-03887 | g unidentified                 | 0.031591113  | 0.393725586 | 0.730757316 |
| g MGYG-HGUT-03278 | g Verticillium                 | 0.013733036  | 0.710874166 | 0.902091837 |
| g MGYG-HGUT-03278 | g unclassified Tremellomycetes | 0.04881472   | 0.187392696 | 0.577661122 |
| g MGYG-HGUT-03278 | g Candida                      | -0.020109593 | 0.58724841  | 0.841243086 |
| g MGYG-HGUT-03278 | g Cladosporium                 | 0.072835137  | 0.049011747 | 0.381430576 |
| g MGYG-HGUT-03278 | g Debaryomyces                 | -0.120462252 | 0.0011014   | 0.063342491 |
| g MGYG-HGUT-03278 | g Aspergillus                  | 0.015656661  | 0.672579232 | 0.881827955 |
| g MGYG-HGUT-03278 | g Kazachstania                 | -0.023970108 | 0.517590529 | 0.803761519 |
| g MGYG-HGUT-03278 | g Malassezia                   | 0.030932607  | 0.403664858 | 0.736936858 |
| g MGYG-HGUT-03278 | g unclassified Fungi           | 0.022014518  | 0.552338087 | 0.820336555 |
| g MGYG-HGUT-03278 | g Mycosphaerella               | -0.013463182 | 0.716307789 | 0.903168431 |
| g MGYG-HGUT-03278 | g Simplicillium                | -0.000416737 | 0.991025548 | 0.996581997 |
| g MGYG-HGUT-03278 | g unclassified Cordycipitaceae | 0.062023525  | 0.093801961 | 0.47288973  |
| g MGYG-HGUT-03278 | g unidentified                 | -0.011666478 | 0.752839382 | 0.911258836 |
| g UBA1081         | g Verticillium                 | 0.04173147   | 0.259804103 | 0.638398936 |
| g UBA1081         | g unclassified Tremellomycetes | -0.082347168 | 0.025987839 | 0.299643528 |
| g UBA1081         | g Candida                      | -0.069465839 | 0.060490326 | 0.412830947 |
| g UBA1081         | g Cladosporium                 | 0.036924624  | 0.318782466 | 0.676514899 |
| g UBA1081         | g Debaryomyces                 | -0.11192425  | 0.002441935 | 0.093287198 |
| g UBA1081         | g Aspergillus                  | 0.076757796  | 0.038004    | 0.343232686 |
| g UBA1081         | g Kazachstania                 | -0.009460574 | 0.798449986 | 0.929569806 |
| g UBA1081         | g Malassezia                   | 0.059024711  | 0.110821599 | 0.49443367  |
| g UBA1081         | g unclassified Fungi           | 0.051645818  | 0.16304903  | 0.560736054 |
| g UBA1081         | g Mycosphaerella               | -0.027218772 | 0.462466783 | 0.769075712 |
| g UBA1081         | g Simplicillium                | -0.032967398 | 0.373435561 | 0.718484102 |
| g UBA1081         | g unclassified Cordycipitaceae | 0.035211324  | 0.341769598 | 0.694699556 |
| g UBA1081         | g unidentified                 | 0.055555555  | 0.133447502 | 0.52185568  |
| g MGYG-HGUT-02700 | g Verticillium                 | 0.05696032   | 0.123889598 | 0.508632924 |
| g MGYG-HGUT-02700 | g unclassified Tremellomycetes | -0.059134076 | 0.11016082  | 0.492961901 |
| g MGYG-HGUT-02700 | g Candida                      | -0.035733882 | 0.334648939 | 0.690008638 |
| g MGYG-HGUT-02700 | g Cladosporium                 | 0.025785899  | 0.486368525 | 0.782775928 |
| g MGYG-HGUT-02700 | g Debaryomyces                 | -0.142883424 | 0.000105998 | 0.018409489 |
| g MGYG-HGUT-02700 | g Aspergillus                  | 0.094862134  | 0.010282294 | 0.1959478   |
| g MGYG-HGUT-02700 | g Kazachstania                 | -0.026140474 | 0.480392521 | 0.780189053 |
| g MGYG-HGUT-02700 | g Malassezia                   | 0.033230377  | 0.369633375 | 0.71692327  |
| g MGYG-HGUT-02700 | g unclassified Fungi           | 0.102328179  | 0.00561966  | 0.144689154 |
| g MGYG-HGUT-02700 | g Mycosphaerella               | 0.017305213  | 0.640417233 | 0.864117891 |
| g MGYG-HGUT-02700 | g Simplicillium                | -0.049220087 | 0.183751505 | 0.575925162 |
| g MGYG-HGUT-02700 | g unclassified Cordycipitaceae | 0.049119812  | 0.184647316 | 0.576342405 |
| g MGYG-HGUT-02700 | g unidentified                 | 0.030920185  | 0.403853788 | 0.736936858 |
| g MGYG-HGUT-00390 | g Verticillium                 | 0.002525034  | 0.945664118 | 0.980291673 |
| g MGYG-HGUT-00390 | g unclassified Tremellomycetes | -0.038060825 | 0.304108709 | 0.670057703 |
| g MGYG-HGUT-00390 | g Candida                      | -0.000144135 | 0.996895995 | 0.998643711 |
| g MGYG-HGUT-00390 | g Cladosporium                 | 0.006157398  | 0.868004028 | 0.955229514 |
| g MGYG-HGUT-00390 | g Debaryomyces                 | -0.048647973 | 0.188905819 | 0.579084988 |
| g MGYG-HGUT-00390 | g Aspergillus                  | 0.059351453  | 0.108856656 | 0.491744185 |
| g MGYG-HGUT-00390 | g Kazachstania                 | 0.005817544  | 0.875228163 | 0.957673757 |
| g MGYG-HGUT-00390 | g Malassezia                   | 0.004049463  | 0.912965759 | 0.970799924 |
| g MGYG-HGUT-00390 | g unclassified Fungi           | 0.047679703  | 0.197870274 | 0.58591995  |
| g MGYG-HGUT-00390 | g Mycosphaerella               | -0.018877118 | 0.610364777 | 0.851291399 |
| g MGYG-HGUT-00390 | g Simplicillium                | -0.004201856 | 0.909704164 | 0.969239777 |
| g MGYG-HGUT-00390 | g unclassified Cordycipitaceae | 0.050991038  | 0.168455997 | 0.563459023 |
| g MGYG-HGUT-00390 | g unidentified                 | 0.064479064  | 0.081482029 | 0.452919383 |
| g MGYG-HGUT-01766 | g Verticillium                 | 0.016757464  | 0.651032594 | 0.870940511 |
| g MGYG-HGUT-01766 | g unclassified Tremellomycetes | -0.021676188 | 0.558463564 | 0.82456557  |
| g MGYG-HGUT-01766 | g Candida                      | -0.002207997 | 0.952477768 | 0.982725584 |
| g MGYG-HGUT-01766 | g Cladosporium                 | 0.033637259  | 0.36379814  | 0.713515619 |
| g MGYG-HGUT-01766 | g Debaryomyces                 | -0.078617124 | 0.03356787  | 0.327713401 |
| g MGYG-HGUT-01766 | g Aspergillus                  | 0.069444517  | 0.060569505 | 0.412830947 |
| g MGYG-HGUT-01766 | g Kazachstania                 | 0.016820586  | 0.649805639 | 0.870052588 |

|                   |                                |              |              |             |
|-------------------|--------------------------------|--------------|--------------|-------------|
| g MGYG-HGUT-01766 | g Malassezia                   | -0.012396486 | 0.737924412  | 0.907794719 |
| g MGYG-HGUT-01766 | g unclassified Fungi           | 0.048684896  | 0.188569992  | 0.578390625 |
| g MGYG-HGUT-01766 | g Mycosphaerella               | -0.000643442 | 0.986143853  | 0.994508172 |
| g MGYG-HGUT-01766 | g Simplicillium                | -0.057264422 | 0.121892484  | 0.506577845 |
| g MGYG-HGUT-01766 | g unclassified Cordycipitaceae | 0.066182396  | 0.073731984  | 0.444184668 |
| g MGYG-HGUT-01766 | g unidentified                 | 0.045662497  | 0.217535497  | 0.60514212  |
| g MGYG-HGUT-03243 | g Verticillium                 | 0.053842476  | 0.145862205  | 0.540957635 |
| g MGYG-HGUT-03243 | g unclassified Tremellomycetes | -0.062234145 | 0.092689935  | 0.471664958 |
| g MGYG-HGUT-03243 | g Candida                      | -0.060113358 | 0.104381574  | 0.484458693 |
| g MGYG-HGUT-03243 | g Cladosporium                 | 0.026123967  | 0.480669846  | 0.780189053 |
| g MGYG-HGUT-03243 | g Debaryomyces                 | -0.104074054 | 0.00485216   | 0.137287575 |
| g MGYG-HGUT-03243 | g Aspergillus                  | 0.050578669  | 0.171929482  | 0.565896666 |
| g MGYG-HGUT-03243 | g Kazachstania                 | -0.041954709 | 0.257261464  | 0.637382803 |
| g MGYG-HGUT-03243 | g Malassezia                   | 0.058871141  | 0.111754735  | 0.495066318 |
| g MGYG-HGUT-03243 | g unclassified Fungi           | 0.097270653  | 0.008497135  | 0.176412932 |
| g MGYG-HGUT-03243 | g Mycosphaerella               | -0.024189765 | 0.513759329  | 0.801136059 |
| g MGYG-HGUT-03243 | g Simplicillium                | -0.031034488 | 0.40211738   | 0.736374759 |
| g MGYG-HGUT-03243 | g unclassified Cordycipitaceae | 0.059172281  | 0.109930716  | 0.492674524 |
| g MGYG-HGUT-03243 | g unidentified                 | 0.025823855  | 0.485726908  | 0.782411275 |
| g MGYG-HGUT-04076 | g Verticillium                 | 0.04907186   | 0.185076836  | 0.576342405 |
| g MGYG-HGUT-04076 | g unclassified Tremellomycetes | -0.043112151 | 0.24435502   | 0.628070155 |
| g MGYG-HGUT-04076 | g Candida                      | -0.04153325  | 0.262076281  | 0.640201835 |
| g MGYG-HGUT-04076 | g Cladosporium                 | 0.019962386  | 0.589988069  | 0.842338356 |
| g MGYG-HGUT-04076 | g Debaryomyces                 | -0.128050309 | 0.00051955   | 0.043633918 |
| g MGYG-HGUT-04076 | g Aspergillus                  | 0.088263241  | 0.016988786  | 0.254671396 |
| g MGYG-HGUT-04076 | g Kazachstania                 | -0.041318487 | 0.264553521  | 0.64234852  |
| g MGYG-HGUT-04076 | g Malassezia                   | 0.049191018  | 0.184010865  | 0.575925162 |
| g MGYG-HGUT-04076 | g unclassified Fungi           | 0.013202717  | 0.721565989  | 0.905336886 |
| g MGYG-HGUT-04076 | g Mycosphaerella               | -0.006194045 | 0.867225688  | 0.955196913 |
| g MGYG-HGUT-04076 | g Simplicillium                | -0.069411271 | 0.060693126  | 0.412830947 |
| g MGYG-HGUT-04076 | g unclassified Cordycipitaceae | 0.068327122  | 0.064840253  | 0.423806055 |
| g MGYG-HGUT-04076 | g unidentified                 | 0.010576451  | 0.775280839  | 0.919527218 |
| g MGYG-HGUT-03176 | g Verticillium                 | 0.008146971  | 0.825951798  | 0.939707765 |
| g MGYG-HGUT-03176 | g unclassified Tremellomycetes | 0.030451301  | 0.411023478  | 0.74205734  |
| g MGYG-HGUT-03176 | g Candida                      | -0.042708764 | 0.248800609  | 0.63134694  |
| g MGYG-HGUT-03176 | g Cladosporium                 | 0.066118532  | 0.074011299  | 0.444193078 |
| g MGYG-HGUT-03176 | g Debaryomyces                 | -0.081184231 | 0.028174608  | 0.307552108 |
| g MGYG-HGUT-03176 | g Aspergillus                  | 0.031087496  | 0.401313629  | 0.735790931 |
| g MGYG-HGUT-03176 | g Kazachstania                 | -0.045080927 | 0.223457141  | 0.617081858 |
| g MGYG-HGUT-03176 | g Malassezia                   | 0.047540127  | 0.199187698  | 0.586641865 |
| g MGYG-HGUT-03176 | g unclassified Fungi           | -0.002887858 | 0.937871332  | 0.977568509 |
| g MGYG-HGUT-03176 | g Mycosphaerella               | -0.087602846 | 0.017835207  | 0.259604076 |
| g MGYG-HGUT-03176 | g Simplicillium                | 0.057804951  | 0.1118404795 | 0.502487018 |
| g MGYG-HGUT-03176 | g unclassified Cordycipitaceae | 0.02600109   | 0.482736922  | 0.780449413 |
| g MGYG-HGUT-03176 | g unidentified                 | -0.050153282 | 0.175568369  | 0.570838406 |
| g MGYG-HGUT-02702 | g Verticillium                 | 0.060527301  | 0.102012113  | 0.480707842 |
| g MGYG-HGUT-02702 | g unclassified Tremellomycetes | 0.00498279   | 0.893015099  | 0.964077309 |
| g MGYG-HGUT-02702 | g Candida                      | -0.021141163 | 0.568216939  | 0.83054176  |
| g MGYG-HGUT-02702 | g Cladosporium                 | 0.045733545  | 0.216819866  | 0.604422504 |
| g MGYG-HGUT-02702 | g Debaryomyces                 | -0.119639699 | 0.0011919    | 0.065691086 |
| g MGYG-HGUT-02702 | g Aspergillus                  | 0.091626838  | 0.013201328  | 0.222446588 |
| g MGYG-HGUT-02702 | g Kazachstania                 | -0.023430699 | 0.527060993  | 0.808899119 |
| g MGYG-HGUT-02702 | g Malassezia                   | 0.057713303  | 0.118990581  | 0.502857899 |
| g MGYG-HGUT-02702 | g unclassified Fungi           | 0.057929258  | 0.117613875  | 0.502289277 |
| g MGYG-HGUT-02702 | g Mycosphaerella               | -0.000272156 | 0.994139041  | 0.997274144 |
| g MGYG-HGUT-02702 | g Simplicillium                | 0.005285643  | 0.88655207   | 0.96210924  |
| g MGYG-HGUT-02702 | g unclassified Cordycipitaceae | 0.087401242  | 0.018100843  | 0.260248809 |
| g MGYG-HGUT-02702 | g unidentified                 | -0.024715397 | 0.504651529  | 0.795181561 |
| g RUG420          | g Verticillium                 | 0.008455841  | 0.819464715  | 0.936961169 |
| g RUG420          | g unclassified Tremellomycetes | -0.022058772 | 0.551539315  | 0.819847749 |
| g RUG420          | g Candida                      | -0.055125531 | 0.136484379  | 0.527817624 |
| g RUG420          | g Cladosporium                 | 0.006885212  | 0.852570879  | 0.949400054 |
| g RUG420          | g Debaryomyces                 | -0.078261187 | 0.034381134  | 0.330746506 |
| g RUG420          | g Aspergillus                  | 0.02243296   | 0.544808006  | 0.816215242 |
| g RUG420          | g Kazachstania                 | -0.020826861 | 0.573984246  | 0.834664141 |
| g RUG420          | g Malassezia                   | 0.016548114  | 0.655108671  | 0.873423203 |
| g RUG420          | g unclassified Fungi           | 0.04152747   | 0.262142747  | 0.640201835 |
| g RUG420          | g Mycosphaerella               | -0.085623615 | 0.020596622  | 0.27577806  |
| g RUG420          | g Simplicillium                | 0.015001584  | 0.685531403  | 0.889127758 |
| g RUG420          | g unclassified Cordycipitaceae | 0.043447623  | 0.240700521  | 0.624217047 |
| g RUG420          | g unidentified                 | 0.018503933  | 0.617442918  | 0.854939171 |
| g MGYG-HGUT-03768 | g Verticillium                 | 0.052879402  | 0.153218858  | 0.549800594 |
| g MGYG-HGUT-03768 | g unclassified Tremellomycetes | 0.009873332  | 0.789857957  | 0.926124865 |
| g MGYG-HGUT-03768 | g Candida                      | -0.087412424 | 0.018086019  | 0.260248809 |
| g MGYG-HGUT-03768 | g Cladosporium                 | 0.091145152  | 0.013693364  | 0.226057992 |
| g MGYG-HGUT-03768 | g Debaryomyces                 | -0.053585291 | 0.14779983   | 0.543295086 |
| g MGYG-HGUT-03768 | g Aspergillus                  | 0.003824276  | 0.917788039  | 0.971437239 |
| g MGYG-HGUT-03768 | g Kazachstania                 | -0.019511629 | 0.59841341   | 0.846523771 |

|   |                 |   |                              |              |             |             |
|---|-----------------|---|------------------------------|--------------|-------------|-------------|
| g | MGYG-HGUT-03768 | g | Malassezia                   | -0.00349368  | 0.924872982 | 0.974172444 |
| g | MGYG-HGUT-03768 | g | unclassified Fungi           | -0.005039022 | 0.8918151   | 0.963568245 |
| g | MGYG-HGUT-03768 | g | Mycosphaerella               | -0.029126803 | 0.431679528 | 0.753274911 |
| g | MGYG-HGUT-03768 | g | Simplicillium                | -0.054950917 | 0.137732625 | 0.530187936 |
| g | MGYG-HGUT-03768 | g | unclassified Cordycipitaceae | 0.119849093  | 0.001168233 | 0.065064446 |
| g | MGYG-HGUT-03768 | g | unidentified                 | -0.03094341  | 0.403500611 | 0.736936858 |
| g | DTU089          | g | Verticillium                 | 0.03816052   | 0.30284288  | 0.668756962 |
| g | DTU089          | g | unclassified Tremellomycetes | 0.026124598  | 0.480659233 | 0.780189053 |
| g | DTU089          | g | Candida                      | -0.021519861 | 0.561304965 | 0.826964057 |
| g | DTU089          | g | Cladosporium                 | 0.117624724  | 0.001443323 | 0.073296059 |
| g | DTU089          | g | Debaryomyces                 | -0.025025071 | 0.499325743 | 0.791370491 |
| g | DTU089          | g | Aspergillus                  | 0.020583773  | 0.578463695 | 0.836772676 |
| g | DTU089          | g | Kazachstania                 | 0.01146888   | 0.756892714 | 0.912236754 |
| g | DTU089          | g | Malassezia                   | 0.02372808   | 0.521828957 | 0.805467412 |
| g | DTU089          | g | unclassified Fungi           | 0.018858414  | 0.610718676 | 0.851291399 |
| g | DTU089          | g | Mycosphaerella               | -0.029608586 | 0.42409737  | 0.747966394 |
| g | DTU089          | g | Simplicillium                | 0.016517891  | 0.655697978 | 0.87366908  |
| g | DTU089          | g | unclassified Cordycipitaceae | 0.083754934  | 0.02353798  | 0.286297588 |
| g | DTU089          | g | unidentified                 | -0.086194901 | 0.019763724 | 0.270879604 |
| g | MGYG-HGUT-00831 | g | Verticillium                 | 0.066043025  | 0.074342645 | 0.444208845 |
| g | MGYG-HGUT-00831 | g | unclassified Tremellomycetes | -0.068494275 | 0.064186041 | 0.423004068 |
| g | MGYG-HGUT-00831 | g | Candida                      | -0.026932223 | 0.467193749 | 0.772354984 |
| g | MGYG-HGUT-00831 | g | Cladosporium                 | 0.054530185  | 0.140776333 | 0.535091651 |
| g | MGYG-HGUT-00831 | g | Debaryomyces                 | -0.15267665  | 3.40E-05    | 0.011128631 |
| g | MGYG-HGUT-00831 | g | Aspergillus                  | 0.07945051   | 0.03172771  | 0.321900887 |
| g | MGYG-HGUT-00831 | g | Kazachstania                 | -0.019654632 | 0.595734561 | 0.845161968 |
| g | MGYG-HGUT-00831 | g | Malassezia                   | 0.048871319  | 0.186881124 | 0.57764928  |
| g | MGYG-HGUT-00831 | g | unclassified Fungi           | 0.049393969  | 0.182205752 | 0.575010893 |
| g | MGYG-HGUT-00831 | g | Mycosphaerella               | -0.01992661  | 0.590654795 | 0.842463713 |
| g | MGYG-HGUT-00831 | g | Simplicillium                | -0.051973955 | 0.160388995 | 0.557261178 |
| g | MGYG-HGUT-00831 | g | unclassified Cordycipitaceae | 0.053928479  | 0.145218602 | 0.540521718 |
| g | MGYG-HGUT-00831 | g | unidentified                 | 0.044646599  | 0.227953983 | 0.61316956  |
| g | MGYG-HGUT-02736 | g | Verticillium                 | 0.068708203  | 0.063356704 | 0.421138313 |
| g | MGYG-HGUT-02736 | g | unclassified Tremellomycetes | -0.018549675 | 0.616573413 | 0.854506981 |
| g | MGYG-HGUT-02736 | g | Candida                      | -0.043288616 | 0.242427858 | 0.626487849 |
| g | MGYG-HGUT-02736 | g | Cladosporium                 | 0.039147749  | 0.290496972 | 0.660476148 |
| g | MGYG-HGUT-02736 | g | Debaryomyces                 | -0.088382241 | 0.016840063 | 0.25384835  |
| g | MGYG-HGUT-02736 | g | Aspergillus                  | 0.00161612   | 0.965207066 | 0.987554992 |
| g | MGYG-HGUT-02736 | g | Kazachstania                 | -0.035397548 | 0.339220987 | 0.693649562 |
| g | MGYG-HGUT-02736 | g | Malassezia                   | 0.10605437   | 0.004097124 | 0.124944571 |
| g | MGYG-HGUT-02736 | g | unclassified Fungi           | 0.056593229  | 0.126334225 | 0.512799682 |
| g | MGYG-HGUT-02736 | g | Mycosphaerella               | -0.033651986 | 0.363588014 | 0.713515619 |
| g | MGYG-HGUT-02736 | g | Simplicillium                | 0.028439903  | 0.442624196 | 0.759625242 |
| g | MGYG-HGUT-02736 | g | unclassified Cordycipitaceae | 0.076575125  | 0.038465522 | 0.344950979 |
| g | MGYG-HGUT-02736 | g | unidentified                 | 0.005968768  | 0.872012342 | 0.956423148 |
| g | UBA945          | g | Verticillium                 | 0.031830439  | 0.390150244 | 0.72965864  |
| g | UBA945          | g | unclassified Tremellomycetes | -0.010388534 | 0.779169254 | 0.921314364 |
| g | UBA945          | g | Candida                      | -0.084680263 | 0.02203889  | 0.282696471 |
| g | UBA945          | g | Cladosporium                 | 0.044472755  | 0.229771805 | 0.615065767 |
| g | UBA945          | g | Debaryomyces                 | -0.024781204 | 0.503517272 | 0.794724407 |
| g | UBA945          | g | Aspergillus                  | 0.077891604  | 0.035243296 | 0.333913017 |
| g | UBA945          | g | Kazachstania                 | -0.014430332 | 0.696902121 | 0.895302916 |
| g | UBA945          | g | Malassezia                   | 1.18E-05     | 0.999745666 | 0.999745666 |
| g | UBA945          | g | unclassified Fungi           | 0.05711694   | 0.122857877 | 0.507646255 |
| g | UBA945          | g | Mycosphaerella               | -0.011397967 | 0.758348994 | 0.91284826  |
| g | UBA945          | g | Simplicillium                | -0.018442178 | 0.618617683 | 0.855825901 |
| g | UBA945          | g | unclassified Cordycipitaceae | 0.077982977  | 0.035028444 | 0.333329108 |
| g | UBA945          | g | unidentified                 | -0.041491443 | 0.262557257 | 0.640622757 |
| g | CAG-557         | g | Verticillium                 | 0.026790484  | 0.469541743 | 0.77312758  |
| g | CAG-557         | g | unclassified Tremellomycetes | -0.057603448 | 0.119695721 | 0.503129929 |
| g | CAG-557         | g | Candida                      | -0.049387022 | 0.182267319 | 0.575010893 |
| g | CAG-557         | g | Cladosporium                 | 0.00655215   | 0.859626781 | 0.952644081 |
| g | CAG-557         | g | Debaryomyces                 | -0.007706212 | 0.835229382 | 0.942615976 |
| g | CAG-557         | g | Aspergillus                  | 0.027733585  | 0.454041632 | 0.765562228 |
| g | CAG-557         | g | Kazachstania                 | -0.043267213 | 0.242661028 | 0.626487849 |
| g | CAG-557         | g | Malassezia                   | 0.057325661  | 0.12149337  | 0.506172817 |
| g | CAG-557         | g | unclassified Fungi           | 0.061124343  | 0.098670053 | 0.477955684 |
| g | CAG-557         | g | Mycosphaerella               | 0.01655226   | 0.655027857 | 0.873423203 |
| g | CAG-557         | g | Simplicillium                | 0.037290036  | 0.314013616 | 0.674151366 |
| g | CAG-557         | g | unclassified Cordycipitaceae | 0.018685433  | 0.613995953 | 0.852976464 |
| g | CAG-557         | g | unidentified                 | 0.103532997  | 0.00507923  | 0.138908586 |
| g | MGYG-HGUT-03955 | g | Verticillium                 | 0.056155269  | 0.129299645 | 0.517100846 |
| g | MGYG-HGUT-03955 | g | unclassified Tremellomycetes | -0.029813552 | 0.420895381 | 0.74604389  |
| g | MGYG-HGUT-03955 | g | Candida                      | -0.05431494  | 0.142353312 | 0.537267149 |
| g | MGYG-HGUT-03955 | g | Cladosporium                 | 0.027924768  | 0.450934959 | 0.764111513 |
| g | MGYG-HGUT-03955 | g | Debaryomyces                 | -0.088800431 | 0.016326431 | 0.250023576 |
| g | MGYG-HGUT-03955 | g | Aspergillus                  | 0.105217959  | 0.004401992 | 0.128679214 |
| g | MGYG-HGUT-03955 | g | Kazachstania                 | 0.008948532  | 0.809142544 | 0.933584001 |

|                   |                                |              |             |             |
|-------------------|--------------------------------|--------------|-------------|-------------|
| g MGYG-HGUT-03955 | g Malassezia                   | 0.039857021  | 0.281838605 | 0.657094722 |
| g MGYG-HGUT-03955 | g unclassified Fungi           | 0.073727992  | 0.046295861 | 0.3742573   |
| g MGYG-HGUT-03955 | g Mycosphaerella               | 0.006855399  | 0.853201979 | 0.949477689 |
| g MGYG-HGUT-03955 | g Simplicillium                | -0.007042234 | 0.849248426 | 0.948917865 |
| g MGYG-HGUT-03955 | g unclassified Cordycipitaceae | 0.033364571  | 0.367702471 | 0.716103178 |
| g MGYG-HGUT-03955 | g unidentified                 | -0.006523962 | 0.860224454 | 0.952883405 |
| g MGYG-HGUT-01829 | g Verticillium                 | 0.012069206  | 0.744599358 | 0.909574751 |
| g MGYG-HGUT-01829 | g unclassified Tremellomycetes | -0.010362379 | 0.779710903 | 0.921371303 |
| g MGYG-HGUT-01829 | g Candida                      | 0.033009034  | 0.372831977 | 0.718373632 |
| g MGYG-HGUT-01829 | g Cladosporium                 | 0.03941118   | 0.287260544 | 0.659118237 |
| g MGYG-HGUT-01829 | g Debaryomyces                 | -0.103144046 | 0.00524834  | 0.140602361 |
| g MGYG-HGUT-01829 | g Aspergillus                  | 0.027603736  | 0.456158489 | 0.766566482 |
| g MGYG-HGUT-01829 | g Kazachstania                 | -0.02717708  | 0.46315288  | 0.769075712 |
| g MGYG-HGUT-01829 | g Malassezia                   | 0.00120609   | 0.974030823 | 0.990490577 |
| g MGYG-HGUT-01829 | g unclassified Fungi           | 0.058057831  | 0.116800166 | 0.500396502 |
| g MGYG-HGUT-01829 | g Mycosphaerella               | -0.045300586 | 0.221207153 | 0.607444148 |
| g MGYG-HGUT-01829 | g Simplicillium                | -0.070327935 | 0.057360076 | 0.407303341 |
| g MGYG-HGUT-01829 | g unclassified Cordycipitaceae | 0.055583395  | 0.133252675 | 0.521799082 |
| g MGYG-HGUT-01829 | g unidentified                 | 0.014252124  | 0.700463445 | 0.896722014 |
| g MGYG-HGUT-04115 | g Verticillium                 | -0.054585904 | 0.140370305 | 0.534436887 |
| g MGYG-HGUT-04115 | g unclassified Tremellomycetes | 0.033835193  | 0.360980405 | 0.711747526 |
| g MGYG-HGUT-04115 | g Candida                      | -0.012539513 | 0.735013503 | 0.907315107 |
| g MGYG-HGUT-04115 | g Cladosporium                 | 0.043051572  | 0.245019069 | 0.628403245 |
| g MGYG-HGUT-04115 | g Debaryomyces                 | 0.043552636  | 0.239564485 | 0.623263007 |
| g MGYG-HGUT-04115 | g Aspergillus                  | 0.015001108  | 0.68554086  | 0.889127758 |
| g MGYG-HGUT-04115 | g Kazachstania                 | 0.017983251  | 0.627378053 | 0.859073688 |
| g MGYG-HGUT-04115 | g Malassezia                   | -0.028414724 | 0.443028369 | 0.760195589 |
| g MGYG-HGUT-04115 | g unclassified Fungi           | 0.003340493  | 0.928157971 | 0.974599406 |
| g MGYG-HGUT-04115 | g Mycosphaerella               | -0.03771253  | 0.308558488 | 0.671651258 |
| g MGYG-HGUT-04115 | g Simplicillium                | -0.020736524 | 0.575646995 | 0.835710866 |
| g MGYG-HGUT-04115 | g unclassified Cordycipitaceae | 0.003804902  | 0.918203061 | 0.971545325 |
| g MGYG-HGUT-04115 | g unidentified                 | -0.015013529 | 0.685294384 | 0.889048376 |
| g MGYG-HGUT-04292 | g Verticillium                 | -0.003839973 | 0.917451796 | 0.971437239 |
| g MGYG-HGUT-04292 | g unclassified Tremellomycetes | -0.046049165 | 0.213661225 | 0.601212885 |
| g MGYG-HGUT-04292 | g Candida                      | 0.000822951  | 0.982278786 | 0.993165881 |
| g MGYG-HGUT-04292 | g Cladosporium                 | 0.016062512  | 0.664602835 | 0.87877386  |
| g MGYG-HGUT-04292 | g Debaryomyces                 | -0.027246266 | 0.462014642 | 0.769075712 |
| g MGYG-HGUT-04292 | g Aspergillus                  | 0.106655273  | 0.003890043 | 0.122149653 |
| g MGYG-HGUT-04292 | g Kazachstania                 | -0.059804003 | 0.106180682 | 0.486830148 |
| g MGYG-HGUT-04292 | g Malassezia                   | 0.006424079  | 0.86234296  | 0.953015155 |
| g MGYG-HGUT-04292 | g unclassified Fungi           | 0.035656869  | 0.335692314 | 0.690980139 |
| g MGYG-HGUT-04292 | g Mycosphaerella               | 0.004252011  | 0.90863104  | 0.9689845   |
| g MGYG-HGUT-04292 | g Simplicillium                | -0.024057761 | 0.516059947 | 0.802695096 |
| g MGYG-HGUT-04292 | g unclassified Cordycipitaceae | 0.026154558  | 0.480155978 | 0.780189053 |
| g MGYG-HGUT-04292 | g unidentified                 | 0.016196179  | 0.661984027 | 0.877059015 |
| g MGYG-HGUT-04437 | g Verticillium                 | 0.028117147  | 0.447821008 | 0.762502994 |
| g MGYG-HGUT-04437 | g unclassified Tremellomycetes | -0.028471198 | 0.442122141 | 0.759256165 |
| g MGYG-HGUT-04437 | g Candida                      | -0.044010062 | 0.23466006  | 0.619063328 |
| g MGYG-HGUT-04437 | g Cladosporium                 | -9.19E-05    | 0.998020773 | 0.998681401 |
| g MGYG-HGUT-04437 | g Debaryomyces                 | -0.096745186 | 0.00886112  | 0.180264028 |
| g MGYG-HGUT-04437 | g Aspergillus                  | 0.091032958  | 0.013810264 | 0.227278708 |
| g MGYG-HGUT-04437 | g Kazachstania                 | -0.055596326 | 0.133162264 | 0.521704213 |
| g MGYG-HGUT-04437 | g Malassezia                   | 0.039829055  | 0.28217666  | 0.657094722 |
| g MGYG-HGUT-04437 | g unclassified Fungi           | 0.007099441  | 0.848038619 | 0.948519677 |
| g MGYG-HGUT-04437 | g Mycosphaerella               | -0.010820629 | 0.770236655 | 0.917329312 |
| g MGYG-HGUT-04437 | g Simplicillium                | -0.033423028 | 0.366863297 | 0.715671969 |
| g MGYG-HGUT-04437 | g unclassified Cordycipitaceae | 0.034218001  | 0.355569739 | 0.706489987 |
| g MGYG-HGUT-04437 | g unidentified                 | 0.064013832  | 0.083709811 | 0.457078031 |
| g MGYG-HGUT-02147 | g Verticillium                 | 0.018668827  | 0.614310985 | 0.853048096 |
| g MGYG-HGUT-02147 | g unclassified Tremellomycetes | 0.010435465  | 0.778197629 | 0.921025311 |
| g MGYG-HGUT-02147 | g Candida                      | -0.001454089 | 0.968693488 | 0.98868774  |
| g MGYG-HGUT-02147 | g Cladosporium                 | 0.030153638  | 0.415613908 | 0.743848203 |
| g MGYG-HGUT-02147 | g Debaryomyces                 | -0.069683507 | 0.059686944 | 0.412545551 |
| g MGYG-HGUT-02147 | g Aspergillus                  | 0.029824643  | 0.420722525 | 0.74604389  |
| g MGYG-HGUT-02147 | g Kazachstania                 | -0.023375482 | 0.528035403 | 0.808944748 |
| g MGYG-HGUT-02147 | g Malassezia                   | 0.023632999  | 0.523498871 | 0.806147397 |
| g MGYG-HGUT-02147 | g unclassified Fungi           | 0.046282999  | 0.21134253  | 0.600680647 |
| g MGYG-HGUT-02147 | g Mycosphaerella               | -0.030443918 | 0.41113696  | 0.74205734  |
| g MGYG-HGUT-02147 | g Simplicillium                | 0.026245092  | 0.478636946 | 0.780181171 |
| g MGYG-HGUT-02147 | g unclassified Cordycipitaceae | 0.061225534  | 0.098112359 | 0.477873659 |
| g MGYG-HGUT-02147 | g unidentified                 | 0.007607175  | 0.837317227 | 0.943910823 |
| g MGYG-HGUT-02159 | g Verticillium                 | -0.00837083  | 0.821248958 | 0.937582962 |
| g MGYG-HGUT-02159 | g unclassified Tremellomycetes | -0.013213245 | 0.721353194 | 0.905336886 |
| g MGYG-HGUT-02159 | g Candida                      | -0.033977076 | 0.358969027 | 0.710020606 |
| g MGYG-HGUT-02159 | g Cladosporium                 | 0.015976591  | 0.66628837  | 0.879421986 |
| g MGYG-HGUT-02159 | g Debaryomyces                 | -0.079983304 | 0.030597078 | 0.315608804 |
| g MGYG-HGUT-02159 | g Aspergillus                  | 0.032313996  | 0.382986622 | 0.723866358 |
| g MGYG-HGUT-02159 | g Kazachstania                 | -0.017024496 | 0.645848529 | 0.868076943 |



|                   |                                |              |             |             |
|-------------------|--------------------------------|--------------|-------------|-------------|
| g MGYG-HGUT-02159 | g Malassezia                   | 0.019345401  | 0.601534153 | 0.847503689 |
| g MGYG-HGUT-02159 | g unclassified Fungi           | -0.042984665 | 0.24575394  | 0.628861629 |
| g MGYG-HGUT-02159 | g Mycosphaerella               | -0.028915826 | 0.435024347 | 0.754902482 |
| g MGYG-HGUT-02159 | g Simplicillium                | 6.81E-05     | 0.998534183 | 0.999006214 |
| g MGYG-HGUT-02159 | g unclassified Cordycipitaceae | 0.066320893  | 0.073129215 | 0.443355619 |
| g MGYG-HGUT-02159 | g unidentified                 | -0.026557143 | 0.473421337 | 0.77526224  |
| g CAG-83          | g Verticillium                 | 0.069036755  | 0.06210022  | 0.417170577 |
| g CAG-83          | g unclassified Tremellomycetes | -0.0568942   | 0.124327183 | 0.508701089 |
| g CAG-83          | g Candida                      | -0.018953365 | 0.608923044 | 0.851291399 |
| g CAG-83          | g Cladosporium                 | 0.017066294  | 0.645038606 | 0.867870124 |
| g CAG-83          | g Debaryomyces                 | -0.164058065 | 8.26E-06    | 0.008626179 |
| g CAG-83          | g Aspergillus                  | 0.080349731  | 0.029839684 | 0.313550961 |
| g CAG-83          | g Kazachstania                 | -0.037247982 | 0.314560045 | 0.674776889 |
| g CAG-83          | g Malassezia                   | 0.028943086  | 0.434591339 | 0.754622456 |
| g CAG-83          | g unclassified Fungi           | 0.084325446  | 0.022603622 | 0.283321191 |
| g CAG-83          | g Mycosphaerella               | 0.00663302   | 0.857912487 | 0.952106527 |
| g CAG-83          | g Simplicillium                | -0.038518262 | 0.298329474 | 0.666157944 |
| g CAG-83          | g unclassified Cordycipitaceae | 0.056310141  | 0.1282449   | 0.51521926  |
| g CAG-83          | g unidentified                 | 0.037974635  | 0.305205885 | 0.670057703 |
| g Oscillibacter   | g Verticillium                 | 0.072112567  | 0.051306229 | 0.388308327 |
| g Oscillibacter   | g unclassified Tremellomycetes | -0.035920489 | 0.332129414 | 0.68778737  |
| g Oscillibacter   | g Candida                      | -0.013516854 | 0.715225925 | 0.902925307 |
| g Oscillibacter   | g Cladosporium                 | 0.051213515  | 0.166603989 | 0.562541523 |
| g Oscillibacter   | g Debaryomyces                 | -0.129298524 | 0.000457321 | 0.039027148 |
| g Oscillibacter   | g Aspergillus                  | 0.096776583  | 0.008838987 | 0.180264028 |
| g Oscillibacter   | g Kazachstania                 | -0.012011667 | 0.745774891 | 0.909574751 |
| g Oscillibacter   | g Malassezia                   | 0.057372895  | 0.121186222 | 0.505823928 |
| g Oscillibacter   | g unclassified Fungi           | 0.08789315   | 0.017458689 | 0.257308974 |
| g Oscillibacter   | g Mycosphaerella               | -0.015062733 | 0.684318392 | 0.888522358 |
| g Oscillibacter   | g Simplicillium                | -0.030768599 | 0.406163462 | 0.738222664 |
| g Oscillibacter   | g unclassified Cordycipitaceae | 0.058709242  | 0.112745168 | 0.495487035 |
| g Oscillibacter   | g unidentified                 | -0.008376088 | 0.821138584 | 0.937561364 |
| g EO              | g Verticillium                 | 0.05664858   | 0.125963231 | 0.512276291 |
| g EO              | g unclassified Tremellomycetes | -0.069426788 | 0.0606354   | 0.412830947 |
| g EO              | g Candida                      | -0.024058192 | 0.516052428 | 0.802695096 |
| g EO              | g Cladosporium                 | -0.011129042 | 0.763879384 | 0.915477365 |
| g EO              | g Debaryomyces                 | -0.15795474  | 1.78E-05    | 0.008790035 |
| g EO              | g Aspergillus                  | 0.088414298  | 0.016800195 | 0.253608648 |
| g EO              | g Kazachstania                 | -0.042984865 | 0.245751738 | 0.628861629 |
| g EO              | g Malassezia                   | 0.015186052  | 0.681874576 | 0.887198957 |
| g EO              | g unclassified Fungi           | 0.101041554  | 0.006253455 | 0.150048656 |
| g EO              | g Mycosphaerella               | -0.018255958 | 0.622165974 | 0.856123107 |
| g EO              | g Simplicillium                | -0.039068932 | 0.291470029 | 0.660859538 |
| g EO              | g unclassified Cordycipitaceae | 0.015958326  | 0.666646885 | 0.879421986 |
| g EO              | g unidentified                 | 0.052790406  | 0.153912635 | 0.551541993 |
| g CAG-170         | g Verticillium                 | 0.047857136  | 0.196204733 | 0.585292221 |
| g CAG-170         | g unclassified Tremellomycetes | -0.086470757 | 0.019372159 | 0.268956611 |
| g CAG-170         | g Candida                      | -0.014646884 | 0.692583509 | 0.893516353 |
| g CAG-170         | g Cladosporium                 | -0.013756544 | 0.710401512 | 0.902091837 |
| g CAG-170         | g Debaryomyces                 | -0.157129662 | 1.98E-05    | 0.008906547 |
| g CAG-170         | g Aspergillus                  | 0.101313513  | 0.00611437  | 0.148686802 |
| g CAG-170         | g Kazachstania                 | -0.047223331 | 0.20220156  | 0.591443895 |
| g CAG-170         | g Malassezia                   | 0.022032794  | 0.552008151 | 0.820068828 |
| g CAG-170         | g unclassified Fungi           | 0.105756946  | 0.004203271 | 0.126033174 |
| g CAG-170         | g Mycosphaerella               | -0.018249482 | 0.622289538 | 0.856123107 |
| g CAG-170         | g Simplicillium                | -0.024674797 | 0.505351974 | 0.795660555 |
| g CAG-170         | g unclassified Cordycipitaceae | 0.042076258  | 0.255884323 | 0.636074209 |
| g CAG-170         | g unidentified                 | 0.065293745  | 0.077696707 | 0.449532201 |
| g CAG-103         | g Verticillium                 | 0.039602138  | 0.284929731 | 0.658096791 |
| g CAG-103         | g unclassified Tremellomycetes | -0.042506619 | 0.25104948  | 0.632257147 |
| g CAG-103         | g Candida                      | -0.015779904 | 0.670153129 | 0.881120344 |
| g CAG-103         | g Cladosporium                 | -0.009311751 | 0.801553943 | 0.930555602 |
| g CAG-103         | g Debaryomyces                 | -0.1524532   | 3.49E-05    | 0.011128631 |
| g CAG-103         | g Aspergillus                  | 0.052496756  | 0.15621873  | 0.553559117 |
| g CAG-103         | g Kazachstania                 | -0.022766844 | 0.538836309 | 0.814978906 |
| g CAG-103         | g Malassezia                   | 0.028277224  | 0.445239245 | 0.76170364  |
| g CAG-103         | g unclassified Fungi           | 0.086663238  | 0.019102965 | 0.267745129 |
| g CAG-103         | g Mycosphaerella               | 0.000104824  | 0.997742556 | 0.998643711 |
| g CAG-103         | g Simplicillium                | -0.049858903 | 0.178119928 | 0.573729188 |
| g CAG-103         | g unclassified Cordycipitaceae | -0.000607545 | 0.986916795 | 0.994846869 |
| g CAG-103         | g unidentified                 | 0.0517761    | 0.161988958 | 0.559767285 |
| g CAG-110         | g Verticillium                 | 0.063074837  | 0.088356094 | 0.465955266 |
| g CAG-110         | g unclassified Tremellomycetes | -0.037236762 | 0.314705939 | 0.674934066 |
| g CAG-110         | g Candida                      | -0.037767812 | 0.30784936  | 0.670952207 |
| g CAG-110         | g Cladosporium                 | -0.009265548 | 0.802518218 | 0.930759292 |
| g CAG-110         | g Debaryomyces                 | -0.135038039 | 0.000250683 | 0.027068677 |
| g CAG-110         | g Aspergillus                  | 0.103224503  | 0.005212948 | 0.140364916 |
| g CAG-110         | g Kazachstania                 | -0.011046409 | 0.765581139 | 0.916134753 |



|                       |                                |              |             |             |
|-----------------------|--------------------------------|--------------|-------------|-------------|
| g CAG-110             | g Malassezia                   | 0.012787604  | 0.729973311 | 0.907197641 |
| g CAG-110             | g unclassified Fungi           | 0.067519086  | 0.068080651 | 0.4353048   |
| g CAG-110             | g Mycosphaerella               | -0.006162061 | 0.867904993 | 0.955229514 |
| g CAG-110             | g Simplicillium                | -0.041283812 | 0.264954988 | 0.64234852  |
| g CAG-110             | g unclassified Cordycipitaceae | 0.044163846  | 0.233027281 | 0.617638717 |
| g CAG-110             | g unidentified                 | 0.029877659  | 0.419896816 | 0.746028897 |
| g Lawsonibacter       | g Verticillium                 | 0.050808376  | 0.169988063 | 0.564843333 |
| g Lawsonibacter       | g unclassified Tremellomycetes | 0.032403209  | 0.381673815 | 0.723098466 |
| g Lawsonibacter       | g Candida                      | -0.007456786 | 0.840489814 | 0.945472862 |
| g Lawsonibacter       | g Cladosporium                 | 0.078190015  | 0.034545751 | 0.331642857 |
| g Lawsonibacter       | g Debaryomyces                 | -0.073478951 | 0.047040366 | 0.375967642 |
| g Lawsonibacter       | g Aspergillus                  | 0.036283151  | 0.32726792  | 0.682858146 |
| g Lawsonibacter       | g Kazachstania                 | 0.029401291  | 0.427350143 | 0.750077827 |
| g Lawsonibacter       | g Malassezia                   | 0.076169073  | 0.039508471 | 0.349272046 |
| g Lawsonibacter       | g unclassified Fungi           | 0.023771157  | 0.521073281 | 0.804845637 |
| g Lawsonibacter       | g Mycosphaerella               | -0.030266235 | 0.413873949 | 0.742811081 |
| g Lawsonibacter       | g Simplicillium                | 0.009143748  | 0.80506168  | 0.931596653 |
| g Lawsonibacter       | g unclassified Cordycipitaceae | 0.08314607   | 0.024571864 | 0.292156703 |
| g Lawsonibacter       | g unidentified                 | -0.026265729 | 0.478291059 | 0.780098026 |
| g UBA738              | g Verticillium                 | 0.059978784  | 0.105161223 | 0.485556938 |
| g UBA738              | g unclassified Tremellomycetes | -0.05388209  | 0.145565485 | 0.540957635 |
| g UBA738              | g Candida                      | -0.013224678 | 0.721122134 | 0.905336886 |
| g UBA738              | g Cladosporium                 | 0.010463709  | 0.777613034 | 0.920872092 |
| g UBA738              | g Debaryomyces                 | -0.15842004  | 1.68E-05    | 0.008790035 |
| g UBA738              | g Aspergillus                  | 0.082381584  | 0.025925419 | 0.29962646  |
| g UBA738              | g Kazachstania                 | -0.044803992 | 0.226317033 | 0.612967811 |
| g UBA738              | g Malassezia                   | 0.02884519   | 0.436147544 | 0.755804366 |
| g UBA738              | g unclassified Fungi           | 0.070722791  | 0.05597191  | 0.403195883 |
| g UBA738              | g Mycosphaerella               | -0.020949729 | 0.571726383 | 0.832646379 |
| g UBA738              | g Simplicillium                | -0.018969531 | 0.608617553 | 0.851291399 |
| g UBA738              | g unclassified Cordycipitaceae | 0.056654319  | 0.125924816 | 0.512276291 |
| g UBA738              | g unidentified                 | 0.047627412  | 0.198363086 | 0.58591995  |
| g Intestinimonas      | g Verticillium                 | 0.066520785  | 0.072266337 | 0.442291717 |
| g Intestinimonas      | g unclassified Tremellomycetes | -0.014183635 | 0.701833888 | 0.897212331 |
| g Intestinimonas      | g Candida                      | 0.018348857  | 0.620394748 | 0.856123107 |
| g Intestinimonas      | g Cladosporium                 | 0.026877229  | 0.46810398  | 0.773111449 |
| g Intestinimonas      | g Debaryomyces                 | -0.116359997 | 0.001625157 | 0.079617657 |
| g Intestinimonas      | g Aspergillus                  | 0.08196103   | 0.026697104 | 0.303120982 |
| g Intestinimonas      | g Kazachstania                 | -0.006503865 | 0.86065062  | 0.953015155 |
| g Intestinimonas      | g Malassezia                   | 0.054618146  | 0.140135765 | 0.533896229 |
| g Intestinimonas      | g unclassified Fungi           | 0.077657888  | 0.035797957 | 0.336723541 |
| g Intestinimonas      | g Mycosphaerella               | -0.014233302 | 0.70083996  | 0.896878518 |
| g Intestinimonas      | g Simplicillium                | -0.03117487  | 0.399990919 | 0.734999218 |
| g Intestinimonas      | g unclassified Cordycipitaceae | 0.069527997  | 0.060260002 | 0.412830947 |
| g Intestinimonas      | g unidentified                 | -0.001038409 | 0.977640275 | 0.991604689 |
| g Flavonifractor      | g Verticillium                 | 0.014426532  | 0.696977994 | 0.895302916 |
| g Flavonifractor      | g unclassified Tremellomycetes | 0.086060327  | 0.019957235 | 0.271798536 |
| g Flavonifractor      | g Candida                      | 0.0226503    | 0.540917027 | 0.815420595 |
| g Flavonifractor      | g Cladosporium                 | 0.098648994  | 0.007604969 | 0.168194189 |
| g Flavonifractor      | g Debaryomyces                 | 0.033928158  | 0.359661709 | 0.710992006 |
| g Flavonifractor      | g Aspergillus                  | -0.003869665 | 0.916815791 | 0.971437239 |
| g Flavonifractor      | g Kazachstania                 | 0.042618188  | 0.249806529 | 0.631737101 |
| g Flavonifractor      | g Malassezia                   | 0.043076482  | 0.244745853 | 0.628403245 |
| g Flavonifractor      | g unclassified Fungi           | -0.002785434 | 0.940070647 | 0.978000513 |
| g Flavonifractor      | g Mycosphaerella               | -0.057645771 | 0.119423672 | 0.502959311 |
| g Flavonifractor      | g Simplicillium                | -0.002710916 | 0.941671017 | 0.978613814 |
| g Flavonifractor      | g unclassified Cordycipitaceae | 0.058472962  | 0.114203004 | 0.497329568 |
| g Flavonifractor      | g unidentified                 | -0.107488235 | 0.003618673 | 0.119732844 |
| g UBA1777             | g Verticillium                 | 0.059295365  | 0.109191988 | 0.492300296 |
| g UBA1777             | g unclassified Tremellomycetes | -0.051780497 | 0.161953266 | 0.559767285 |
| g UBA1777             | g Candida                      | -0.041299248 | 0.264776225 | 0.64234852  |
| g UBA1777             | g Cladosporium                 | 0.005075172  | 0.891043811 | 0.963128254 |
| g UBA1777             | g Debaryomyces                 | -0.161167691 | 1.19E-05    | 0.008626179 |
| g UBA1777             | g Aspergillus                  | 0.068435505  | 0.064415439 | 0.423004068 |
| g UBA1777             | g Kazachstania                 | -0.041931588 | 0.25752401  | 0.637448375 |
| g UBA1777             | g Malassezia                   | 0.03091696   | 0.403902842 | 0.736936858 |
| g UBA1777             | g unclassified Fungi           | 0.066387776  | 0.072839565 | 0.443159258 |
| g UBA1777             | g Mycosphaerella               | -0.015535252 | 0.674972563 | 0.883433477 |
| g UBA1777             | g Simplicillium                | -0.038350084 | 0.30044566  | 0.667386268 |
| g UBA1777             | g unclassified Cordycipitaceae | 0.057852267  | 0.11810325  | 0.502487018 |
| g UBA1777             | g unidentified                 | 0.056479592  | 0.127098533 | 0.514159428 |
| g Ruminiclostridium_C | g Verticillium                 | 0.034889984  | 0.34619603  | 0.697400798 |
| g Ruminiclostridium_C | g unclassified Tremellomycetes | 0.007004018  | 0.850056793 | 0.948917865 |
| g Ruminiclostridium_C | g Candida                      | -0.052521421 | 0.156024032 | 0.553299702 |
| g Ruminiclostridium_C | g Cladosporium                 | -0.010933052 | 0.767917481 | 0.916616044 |
| g Ruminiclostridium_C | g Debaryomyces                 | -0.114249801 | 0.001975955 | 0.084840998 |
| g Ruminiclostridium_C | g Aspergillus                  | 0.112367867  | 0.002345961 | 0.09226991  |
| g Ruminiclostridium_C | g Kazachstania                 | -0.046194976 | 0.212213223 | 0.600680647 |

|                       |                                |              |             |             |
|-----------------------|--------------------------------|--------------|-------------|-------------|
| g Ruminiclostridium C | g Malassezia                   | -0.017908231 | 0.628815141 | 0.859818244 |
| g Ruminiclostridium C | g unclassified Fungi           | 0.069944536  | 0.058735185 | 0.410342032 |
| g Ruminiclostridium C | g Mycosphaerella               | -0.041777864 | 0.259274257 | 0.638204276 |
| g Ruminiclostridium C | g Simplicillium                | 0.014294952  | 0.699606952 | 0.896059159 |
| g Ruminiclostridium C | g unclassified Cordycipitaceae | 0.029644214  | 0.423539768 | 0.747439326 |
| g Ruminiclostridium C | g unidentified                 | 0.041042899  | 0.267755883 | 0.644978472 |
| g F23-B02             | g Verticillium                 | 0.091979349  | 0.012851196 | 0.221076037 |
| g F23-B02             | g unclassified Tremellomycetes | -0.0587692   | 0.112377567 | 0.495410348 |
| g F23-B02             | g Candida                      | -0.040899752 | 0.269429724 | 0.646949249 |
| g F23-B02             | g Cladosporium                 | -0.002808895 | 0.939566834 | 0.978000513 |
| g F23-B02             | g Debaryomyces                 | -0.183378683 | 5.98E-07    | 0.003163107 |
| g F23-B02             | g Aspergillus                  | 0.09164065   | 0.013187453 | 0.222446588 |
| g F23-B02             | g Kazachstania                 | 0.00015826   | 0.996591795 | 0.998573466 |
| g F23-B02             | g Malassezia                   | 0.064004902  | 0.083753049 | 0.457078267 |
| g F23-B02             | g unclassified Fungi           | 0.096033908  | 0.009375936 | 0.186496531 |
| g F23-B02             | g Mycosphaerella               | 0.010994364  | 0.766653554 | 0.916485304 |
| g F23-B02             | g Simplicillium                | -0.021735149 | 0.557393713 | 0.823675503 |
| g F23-B02             | g unclassified Cordycipitaceae | 0.081294233  | 0.027961197 | 0.307552108 |
| g F23-B02             | g unidentified                 | 0.016341697  | 0.65913771  | 0.875156242 |
| g MGYG-HGUT-02726     | g Verticillium                 | 0.012709545  | 0.731557909 | 0.907315107 |
| g MGYG-HGUT-02726     | g unclassified Tremellomycetes | 0.061085892  | 0.098882626 | 0.47808105  |
| g MGYG-HGUT-02726     | g Candida                      | -0.030428265 | 0.411377643 | 0.742106754 |
| g MGYG-HGUT-02726     | g Cladosporium                 | 0.092897284  | 0.011977643 | 0.214100376 |
| g MGYG-HGUT-02726     | g Debaryomyces                 | -0.070575161 | 0.056487619 | 0.404484002 |
| g MGYG-HGUT-02726     | g Aspergillus                  | 0.002835419  | 0.938997266 | 0.978000513 |
| g MGYG-HGUT-02726     | g Kazachstania                 | 0.018361976  | 0.620144791 | 0.856123107 |
| g MGYG-HGUT-02726     | g Malassezia                   | 0.023126793  | 0.53243531  | 0.811490628 |
| g MGYG-HGUT-02726     | g unclassified Fungi           | 0.05446639   | 0.141242315 | 0.535900387 |
| g MGYG-HGUT-02726     | g Mycosphaerella               | -0.045361572 | 0.220585356 | 0.607083027 |
| g MGYG-HGUT-02726     | g Simplicillium                | 0.010915659  | 0.76827614  | 0.916865092 |
| g MGYG-HGUT-02726     | g unclassified Cordycipitaceae | 0.056888789  | 0.124363043 | 0.508701089 |
| g MGYG-HGUT-02726     | g unidentified                 | -0.032820924 | 0.375563732 | 0.719866895 |
| g MGYG-HGUT-01104     | g Verticillium                 | 0.029871581  | 0.41999143  | 0.74604389  |
| g MGYG-HGUT-01104     | g unclassified Tremellomycetes | 0.07382278   | 0.046015105 | 0.372842148 |
| g MGYG-HGUT-01104     | g Candida                      | -0.001151676 | 0.97520208  | 0.990490577 |
| g MGYG-HGUT-01104     | g Cladosporium                 | 0.097519772  | 0.008329282 | 0.17418732  |
| g MGYG-HGUT-01104     | g Debaryomyces                 | -0.041834005 | 0.258634101 | 0.637931914 |
| g MGYG-HGUT-01104     | g Aspergillus                  | -0.008180655 | 0.825243765 | 0.939308882 |
| g MGYG-HGUT-01104     | g Kazachstania                 | 0.005236806  | 0.887596414 | 0.962165284 |
| g MGYG-HGUT-01104     | g Malassezia                   | 0.081631085  | 0.02731631  | 0.305416237 |
| g MGYG-HGUT-01104     | g unclassified Fungi           | 0.049650229  | 0.179945249 | 0.574819597 |
| g MGYG-HGUT-01104     | g Mycosphaerella               | -0.053469597 | 0.148677848 | 0.54477458  |
| g MGYG-HGUT-01104     | g Simplicillium                | 0.008333702  | 0.822028509 | 0.938068121 |
| g MGYG-HGUT-01104     | g unclassified Cordycipitaceae | 0.0874235    | 0.018071347 | 0.260248809 |
| g MGYG-HGUT-01104     | g unidentified                 | -0.051149795 | 0.167132859 | 0.562908051 |
| g NK3B98              | g Verticillium                 | 0.053955956  | 0.145013439 | 0.540332211 |
| g NK3B98              | g unclassified Tremellomycetes | 0.005246024  | 0.887399881 | 0.962165284 |
| g NK3B98              | g Candida                      | -0.024850611 | 0.50232244  | 0.793568839 |
| g NK3B98              | g Cladosporium                 | 0.041499369  | 0.262466021 | 0.640547841 |
| g NK3B98              | g Debaryomyces                 | -0.160406948 | 1.31E-05    | 0.008626179 |
| g NK3B98              | g Aspergillus                  | 0.080096406  | 0.030361561 | 0.315608804 |
| g NK3B98              | g Kazachstania                 | -0.046813802 | 0.206146611 | 0.595517977 |
| g NK3B98              | g Malassezia                   | 0.028270541  | 0.445346855 | 0.76170364  |
| g NK3B98              | g unclassified Fungi           | 0.069593022  | 0.060019832 | 0.412830947 |
| g NK3B98              | g Mycosphaerella               | -0.016397332 | 0.658050794 | 0.874757951 |
| g NK3B98              | g Simplicillium                | -0.004633803 | 0.900467772 | 0.96604016  |
| g NK3B98              | g unclassified Cordycipitaceae | 0.06481995   | 0.079880356 | 0.45101344  |
| g NK3B98              | g unidentified                 | 0.030624462  | 0.40836694  | 0.739701978 |
| g MGYG-HGUT-03980     | g Verticillium                 | 0.066869017  | 0.070782999 | 0.440085605 |
| g MGYG-HGUT-03980     | g unclassified Tremellomycetes | -0.083647685 | 0.023717313 | 0.287158588 |
| g MGYG-HGUT-03980     | g Candida                      | 0.013420835  | 0.717161773 | 0.903293001 |
| g MGYG-HGUT-03980     | g Cladosporium                 | 0.033649387  | 0.363625098 | 0.713515619 |
| g MGYG-HGUT-03980     | g Debaryomyces                 | -0.152244808 | 3.58E-05    | 0.011128631 |
| g MGYG-HGUT-03980     | g Aspergillus                  | 0.063146862  | 0.087992514 | 0.465539911 |
| g MGYG-HGUT-03980     | g Kazachstania                 | -0.056917194 | 0.12417487  | 0.508701089 |
| g MGYG-HGUT-03980     | g Malassezia                   | 0.019386059  | 0.600770164 | 0.847052968 |
| g MGYG-HGUT-03980     | g unclassified Fungi           | 0.085421982  | 0.020897798 | 0.277879145 |
| g MGYG-HGUT-03980     | g Mycosphaerella               | 0.024019085  | 0.516735009 | 0.802865612 |
| g MGYG-HGUT-03980     | g Simplicillium                | -0.035333916 | 0.340090468 | 0.694699556 |
| g MGYG-HGUT-03980     | g unclassified Cordycipitaceae | 0.106510364  | 0.003939094 | 0.122598495 |
| g MGYG-HGUT-03980     | g unidentified                 | 0.01996318   | 0.589973289 | 0.842338356 |
| g MGYG-HGUT-02776     | g Verticillium                 | 0.01223761   | 0.741162299 | 0.90933095  |
| g MGYG-HGUT-02776     | g unclassified Tremellomycetes | 0.076060991  | 0.039790083 | 0.350298383 |
| g MGYG-HGUT-02776     | g Candida                      | 0.010903309  | 0.768530842 | 0.916865092 |
| g MGYG-HGUT-02776     | g Cladosporium                 | 0.050896022  | 0.169251645 | 0.563866155 |
| g MGYG-HGUT-02776     | g Debaryomyces                 | -0.090908518 | 0.01394095  | 0.22809205  |
| g MGYG-HGUT-02776     | g Aspergillus                  | 0.01013192   | 0.784488051 | 0.923685117 |
| g MGYG-HGUT-02776     | g Kazachstania                 | 0.010935076  | 0.76787574  | 0.916616044 |

|                       |                                |              |             |             |
|-----------------------|--------------------------------|--------------|-------------|-------------|
| g MGYG-HGUT-02776     | g Malassezia                   | 0.015595631  | 0.673781904 | 0.882782435 |
| g MGYG-HGUT-02776     | g unclassified Fungi           | 0.015084211  | 0.683892517 | 0.888296381 |
| g MGYG-HGUT-02776     | g Mycosphaerella               | -0.013054695 | 0.724560109 | 0.906744053 |
| g MGYG-HGUT-02776     | g Simplicillium                | -0.023400462 | 0.527594472 | 0.808944748 |
| g MGYG-HGUT-02776     | g unclassified Cordycipitaceae | 0.043381782  | 0.241414719 | 0.625373454 |
| g MGYG-HGUT-02776     | g unidentified                 | -0.002309655 | 0.950292571 | 0.982348232 |
| g Pseudoflavonifactor | g Verticillium                 | 0.070922661  | 0.055279955 | 0.400940701 |
| g Pseudoflavonifactor | g unclassified Tremellomycetes | 0.026770105  | 0.469879878 | 0.773292204 |
| g Pseudoflavonifactor | g Candida                      | -0.004654864 | 0.900017762 | 0.96604016  |
| g Pseudoflavonifactor | g Cladosporium                 | 0.092603621  | 0.012251214 | 0.217886296 |
| g Pseudoflavonifactor | g Debaryomyces                 | -0.069134438 | 0.061730643 | 0.416988935 |
| g Pseudoflavonifactor | g Aspergillus                  | 0.007551836  | 0.838484335 | 0.944407101 |
| g Pseudoflavonifactor | g Kazachstania                 | -0.035312418 | 0.340384537 | 0.694699556 |
| g Pseudoflavonifactor | g Malassezia                   | 0.057899771  | 0.117801112 | 0.502447147 |
| g Pseudoflavonifactor | g unclassified Fungi           | 0.027856932  | 0.452035895 | 0.76468047  |
| g Pseudoflavonifactor | g Mycosphaerella               | -0.037060313 | 0.317006144 | 0.675913564 |
| g Pseudoflavonifactor | g Simplicillium                | 0.005244424  | 0.887433986 | 0.962165284 |
| g Pseudoflavonifactor | g unclassified Cordycipitaceae | 0.11511653   | 0.001824229 | 0.083377853 |
| g Pseudoflavonifactor | g unidentified                 | -0.060718662 | 0.100931279 | 0.478906569 |
| g UBA5446             | g Verticillium                 | -0.000421438 | 0.99092431  | 0.996574895 |
| g UBA5446             | g unclassified Tremellomycetes | 0.02238987   | 0.545581065 | 0.816281885 |
| g UBA5446             | g Candida                      | 0.003911992  | 0.915909266 | 0.971437239 |
| g UBA5446             | g Cladosporium                 | 0.039871482  | 0.28166391  | 0.657094722 |
| g UBA5446             | g Debaryomyces                 | -0.148982434 | 5.26E-05    | 0.013389478 |
| g UBA5446             | g Aspergillus                  | 0.047015735  | 0.204194438 | 0.593697806 |
| g UBA5446             | g Kazachstania                 | -0.037599238 | 0.310015107 | 0.672249972 |
| g UBA5446             | g Malassezia                   | 0.085369337  | 0.02097706  | 0.277879145 |
| g UBA5446             | g unclassified Fungi           | 0.027282154  | 0.461424839 | 0.769075712 |
| g UBA5446             | g Mycosphaerella               | -0.030718698 | 0.40692552  | 0.738420989 |
| g UBA5446             | g Simplicillium                | -0.000569819 | 0.987729154 | 0.995158517 |
| g UBA5446             | g unclassified Cordycipitaceae | 0.059172672  | 0.109928366 | 0.492674524 |
| g UBA5446             | g unidentified                 | 0.033656299  | 0.363526493 | 0.713515619 |
| g MGYG-HGUT-02213     | g Verticillium                 | 0.081687055  | 0.027210408 | 0.305021761 |
| g MGYG-HGUT-02213     | g unclassified Tremellomycetes | -0.031049657 | 0.401887271 | 0.736155635 |
| g MGYG-HGUT-02213     | g Candida                      | -0.033774675 | 0.361840463 | 0.712636475 |
| g MGYG-HGUT-02213     | g Cladosporium                 | 0.046166705  | 0.212493415 | 0.600880647 |
| g MGYG-HGUT-02213     | g Debaryomyces                 | -0.156950943 | 2.02E-05    | 0.008906547 |
| g MGYG-HGUT-02213     | g Aspergillus                  | 0.086825024  | 0.01887923  | 0.266728981 |
| g MGYG-HGUT-02213     | g Kazachstania                 | -0.031388623 | 0.396766045 | 0.732625333 |
| g MGYG-HGUT-02213     | g Malassezia                   | 0.069023017  | 0.062152343 | 0.417170577 |
| g MGYG-HGUT-02213     | g unclassified Fungi           | 0.08176639   | 0.027060904 | 0.30473778  |
| g MGYG-HGUT-02213     | g Mycosphaerella               | -0.002018687 | 0.956548019 | 0.984170261 |
| g MGYG-HGUT-02213     | g Simplicillium                | 0.004549861  | 0.90226171  | 0.966636316 |
| g MGYG-HGUT-02213     | g unclassified Cordycipitaceae | 0.065425751  | 0.077097033 | 0.448667857 |
| g MGYG-HGUT-02213     | g unidentified                 | 0.005313363  | 0.885964305 | 0.96210924  |
| g UBA9475             | g Verticillium                 | 0.06971143   | 0.059584525 | 0.412336263 |
| g UBA9475             | g unclassified Tremellomycetes | 0.028206536  | 0.446378272 | 0.761832544 |
| g UBA9475             | g Candida                      | 0.016842347  | 0.649382872 | 0.870052588 |
| g UBA9475             | g Cladosporium                 | 0.075672741  | 0.040815748 | 0.35073648  |
| g UBA9475             | g Debaryomyces                 | -0.101586227 | 0.005977698 | 0.148686802 |
| g UBA9475             | g Aspergillus                  | 0.076345409  | 0.039052643 | 0.34639989  |
| g UBA9475             | g Kazachstania                 | 0.023393003  | 0.527726109 | 0.808944748 |
| g UBA9475             | g Malassezia                   | 0.073505652  | 0.046960067 | 0.375701373 |
| g UBA9475             | g unclassified Fungi           | 0.017798502  | 0.630919641 | 0.860229872 |
| g UBA9475             | g Mycosphaerella               | -0.027481479 | 0.458156633 | 0.767141961 |
| g UBA9475             | g Simplicillium                | 0.000140074  | 0.996983448 | 0.998643711 |
| g UBA9475             | g unclassified Cordycipitaceae | 0.090617036  | 0.014251338 | 0.2305609   |
| g UBA9475             | g unidentified                 | -0.045298034 | 0.221233202 | 0.607444148 |
| g MGYG-HGUT-01226     | g Verticillium                 | 0.05359018   | 0.147762817 | 0.543295086 |
| g MGYG-HGUT-01226     | g unclassified Tremellomycetes | -0.035467546 | 0.338266163 | 0.692902156 |
| g MGYG-HGUT-01226     | g Candida                      | -0.018275593 | 0.621791437 | 0.856123107 |
| g MGYG-HGUT-01226     | g Cladosporium                 | 0.0119364    | 0.747313467 | 0.91001969  |
| g MGYG-HGUT-01226     | g Debaryomyces                 | -0.139928874 | 0.000147363 | 0.01973912  |
| g MGYG-HGUT-01226     | g Aspergillus                  | 0.065798387  | 0.075424506 | 0.444977361 |
| g MGYG-HGUT-01226     | g Kazachstania                 | -0.007481538 | 0.839967475 | 0.945086212 |
| g MGYG-HGUT-01226     | g Malassezia                   | 0.01391986   | 0.70712094  | 0.90045172  |
| g MGYG-HGUT-01226     | g unclassified Fungi           | 0.088166744  | 0.017110227 | 0.255735056 |
| g MGYG-HGUT-01226     | g Mycosphaerella               | 0.01474109   | 0.690707892 | 0.892547431 |
| g MGYG-HGUT-01226     | g Simplicillium                | -0.016581277 | 0.654462307 | 0.872937805 |
| g MGYG-HGUT-01226     | g unclassified Cordycipitaceae | 0.062298635  | 0.092351564 | 0.471664958 |
| g MGYG-HGUT-01226     | g unidentified                 | 0.030038847  | 0.417392208 | 0.744489993 |
| g MGYG-HGUT-03297     | g Verticillium                 | 0.038917701  | 0.293343216 | 0.662256281 |
| g MGYG-HGUT-03297     | g unclassified Tremellomycetes | 0.044571106  | 0.22874212  | 0.613524642 |
| g MGYG-HGUT-03297     | g Candida                      | -0.020546486 | 0.579152246 | 0.836772676 |
| g MGYG-HGUT-03297     | g Cladosporium                 | 0.068800141  | 0.06300301  | 0.420099469 |
| g MGYG-HGUT-03297     | g Debaryomyces                 | -0.075988509 | 0.039979889 | 0.350685903 |
| g MGYG-HGUT-03297     | g Aspergillus                  | 0.052401222  | 0.156974591 | 0.554071089 |
| g MGYG-HGUT-03297     | g Kazachstania                 | 0.021710367  | 0.55784327  | 0.824109658 |

|                   |                                |              |             |             |
|-------------------|--------------------------------|--------------|-------------|-------------|
| g MGYG-HGUT-03297 | g Malassezia                   | 0.042254362  | 0.253875657 | 0.634509259 |
| g MGYG-HGUT-03297 | g unclassified Fungi           | 0.071502508  | 0.053312667 | 0.396176014 |
| g MGYG-HGUT-03297 | g Mycosphaerella               | 0.010857108  | 0.769483893 | 0.917270973 |
| g MGYG-HGUT-03297 | g Simplicillium                | 0.023170907  | 0.531653476 | 0.811490628 |
| g MGYG-HGUT-03297 | g unclassified Cordycipitaceae | 0.067189879  | 0.069438399 | 0.438684857 |
| g MGYG-HGUT-03297 | g unidentified                 | -0.031602069 | 0.393561487 | 0.730757316 |
| g MGYG-HGUT-02840 | g Verticillium                 | 0.076459362  | 0.038760454 | 0.345770459 |
| g MGYG-HGUT-02840 | g unclassified Tremellomycetes | 0.008999695  | 0.808072508 | 0.933437643 |
| g MGYG-HGUT-02840 | g Candida                      | -0.022386752 | 0.545637027 | 0.816281885 |
| g MGYG-HGUT-02840 | g Cladosporium                 | 0.062482173  | 0.091393976 | 0.470392034 |
| g MGYG-HGUT-02840 | g Debaryomyces                 | -0.146338741 | 7.15E-05    | 0.01645153  |
| g MGYG-HGUT-02840 | g Aspergillus                  | 0.05122605   | 0.1665001   | 0.562541523 |
| g MGYG-HGUT-02840 | g Kazachstania                 | -0.001147013 | 0.975302438 | 0.990490577 |
| g MGYG-HGUT-02840 | g Malassezia                   | 0.074589061  | 0.043797565 | 0.364933723 |
| g MGYG-HGUT-02840 | g unclassified Fungi           | 0.055939509  | 0.130780249 | 0.517833494 |
| g MGYG-HGUT-02840 | g Mycosphaerella               | -0.026272049 | 0.47818515  | 0.780093407 |
| g MGYG-HGUT-02840 | g Simplicillium                | 0.007975694  | 0.829554226 | 0.940630371 |
| g MGYG-HGUT-02840 | g unclassified Cordycipitaceae | 0.084337919  | 0.02258356  | 0.283321191 |
| g MGYG-HGUT-02840 | g unidentified                 | -0.000336856 | 0.992745733 | 0.996941403 |
| g MGYG-HGUT-04580 | g Verticillium                 | 0.036959027  | 0.318331479 | 0.676223819 |
| g MGYG-HGUT-04580 | g unclassified Tremellomycetes | 0.028143786  | 0.447390773 | 0.762502994 |
| g MGYG-HGUT-04580 | g Candida                      | -0.002471839 | 0.946807112 | 0.980691059 |
| g MGYG-HGUT-04580 | g Cladosporium                 | 0.009214519  | 0.803583581 | 0.931248848 |
| g MGYG-HGUT-04580 | g Debaryomyces                 | -0.119060907 | 0.001259638 | 0.06826367  |
| g MGYG-HGUT-04580 | g Aspergillus                  | 0.074113078  | 0.045164154 | 0.369626513 |
| g MGYG-HGUT-04580 | g Kazachstania                 | -0.057801476 | 0.118426963 | 0.502487018 |
| g MGYG-HGUT-04580 | g Malassezia                   | 0.055860896  | 0.131322964 | 0.518655697 |
| g MGYG-HGUT-04580 | g unclassified Fungi           | 0.045045101  | 0.223826555 | 0.610957608 |
| g MGYG-HGUT-04580 | g Mycosphaerella               | -0.006760387 | 0.855213931 | 0.950427981 |
| g MGYG-HGUT-04580 | g Simplicillium                | 0.020816413  | 0.574176431 | 0.834664141 |
| g MGYG-HGUT-04580 | g unclassified Cordycipitaceae | 0.034118117  | 0.35697656  | 0.707666908 |
| g MGYG-HGUT-04580 | g unidentified                 | 0.026672327  | 0.47150406  | 0.773919026 |
| g MGYG-HGUT-02696 | g Verticillium                 | 0.07687445   | 0.037711738 | 0.342509087 |
| g MGYG-HGUT-02696 | g unclassified Tremellomycetes | 0.019702557  | 0.594838024 | 0.844389068 |
| g MGYG-HGUT-02696 | g Candida                      | 0.000171892  | 0.996298227 | 0.9984684   |
| g MGYG-HGUT-02696 | g Cladosporium                 | 0.051008582  | 0.168309398 | 0.563459023 |
| g MGYG-HGUT-02696 | g Debaryomyces                 | -0.080470235 | 0.029594146 | 0.313165257 |
| g MGYG-HGUT-02696 | g Aspergillus                  | 0.026807303  | 0.469262797 | 0.77312422  |
| g MGYG-HGUT-02696 | g Kazachstania                 | 0.006691911  | 0.856664544 | 0.951429912 |
| g MGYG-HGUT-02696 | g Malassezia                   | 0.069649056  | 0.059813506 | 0.412830947 |
| g MGYG-HGUT-02696 | g unclassified Fungi           | 0.020153582  | 0.58643088  | 0.840754853 |
| g MGYG-HGUT-02696 | g Mycosphaerella               | -0.027224446 | 0.462373453 | 0.769075712 |
| g MGYG-HGUT-02696 | g Simplicillium                | -0.002886887 | 0.937892186 | 0.977568509 |
| g MGYG-HGUT-02696 | g unclassified Cordycipitaceae | 0.079289585  | 0.032076161 | 0.323266606 |
| g MGYG-HGUT-02696 | g unidentified                 | -0.046621606 | 0.208017175 | 0.597903264 |
| g MGYG-HGUT-02067 | g Verticillium                 | 0.008457211  | 0.819435977 | 0.936961169 |
| g MGYG-HGUT-02067 | g unclassified Tremellomycetes | 0.045370239  | 0.220497094 | 0.607083027 |
| g MGYG-HGUT-02067 | g Candida                      | -0.007651377 | 0.836385227 | 0.943389613 |
| g MGYG-HGUT-02067 | g Cladosporium                 | 0.036767183  | 0.320851678 | 0.678140479 |
| g MGYG-HGUT-02067 | g Debaryomyces                 | -0.065330478 | 0.077529457 | 0.449313418 |
| g MGYG-HGUT-02067 | g Aspergillus                  | -0.016995019 | 0.64641995  | 0.868120757 |
| g MGYG-HGUT-02067 | g Kazachstania                 | -0.015752797 | 0.670686468 | 0.881311835 |
| g MGYG-HGUT-02067 | g Malassezia                   | 0.015405716  | 0.677529726 | 0.884796861 |
| g MGYG-HGUT-02067 | g unclassified Fungi           | -0.019047517 | 0.607144847 | 0.850855088 |
| g MGYG-HGUT-02067 | g Mycosphaerella               | -0.052171188 | 0.158805957 | 0.555285495 |
| g MGYG-HGUT-02067 | g Simplicillium                | 0.054741834  | 0.139238808 | 0.533656308 |
| g MGYG-HGUT-02067 | g unclassified Cordycipitaceae | 0.041051322  | 0.267657616 | 0.644978472 |
| g MGYG-HGUT-02067 | g unidentified                 | -0.028114243 | 0.447867924 | 0.762502994 |
| g MGYG-HGUT-02727 | g Verticillium                 | 0.07103428   | 0.054896636 | 0.400015015 |
| g MGYG-HGUT-02727 | g unclassified Tremellomycetes | -0.018564073 | 0.616299835 | 0.854294583 |
| g MGYG-HGUT-02727 | g Candida                      | -0.014959399 | 0.686368702 | 0.889765234 |
| g MGYG-HGUT-02727 | g Cladosporium                 | 0.06820575   | 0.06531872  | 0.424832637 |
| g MGYG-HGUT-02727 | g Debaryomyces                 | -0.124192986 | 0.000765168 | 0.051090495 |
| g MGYG-HGUT-02727 | g Aspergillus                  | 0.078840919  | 0.033064986 | 0.326393361 |
| g MGYG-HGUT-02727 | g Kazachstania                 | 0.001635829  | 0.964783024 | 0.987363052 |
| g MGYG-HGUT-02727 | g Malassezia                   | 0.081230506  | 0.028084661 | 0.307552108 |
| g MGYG-HGUT-02727 | g unclassified Fungi           | 0.054042082  | 0.144371789 | 0.539266599 |
| g MGYG-HGUT-02727 | g Mycosphaerella               | 0.002381515  | 0.948748113 | 0.981955991 |
| g MGYG-HGUT-02727 | g Simplicillium                | 0.00549432   | 0.88210847  | 0.960534249 |
| g MGYG-HGUT-02727 | g unclassified Cordycipitaceae | 0.083969793  | 0.02318224  | 0.285641852 |
| g MGYG-HGUT-02727 | g unidentified                 | -0.002549812 | 0.945131761 | 0.980291673 |
| g Marseille-P3106 | g Verticillium                 | 0.017144606  | 0.643522324 | 0.866821949 |
| g Marseille-P3106 | g unclassified Tremellomycetes | 0.038727314  | 0.295712837 | 0.66439677  |
| g Marseille-P3106 | g Candida                      | 0.001734712  | 0.962655742 | 0.986228955 |
| g Marseille-P3106 | g Cladosporium                 | 0.119720737  | 0.001182689 | 0.065524681 |
| g Marseille-P3106 | g Debaryomyces                 | -0.124033724 | 0.000777317 | 0.051090495 |
| g Marseille-P3106 | g Aspergillus                  | 0.023090254  | 0.533083319 | 0.811490628 |
| g Marseille-P3106 | g Kazachstania                 | 0.004251878  | 0.908633889 | 0.9689845   |



|   |                 |   |                              |              |             |             |
|---|-----------------|---|------------------------------|--------------|-------------|-------------|
| g | Marseille-P3106 | g | Malassezia                   | 0.101970106  | 0.005789969 | 0.146577642 |
| g | Marseille-P3106 | g | unclassified Fungi           | 0.017266288  | 0.641169204 | 0.864552417 |
| g | Marseille-P3106 | g | Mycosphaerella               | -0.002638575 | 0.943224872 | 0.979413756 |
| g | Marseille-P3106 | g | Simplicillium                | 0.018871961  | 0.610462334 | 0.851291399 |
| g | Marseille-P3106 | g | unclassified Cordycipitaceae | 0.089479527  | 0.015521587 | 0.244418801 |
| g | Marseille-P3106 | g | unidentified                 | -0.003822526 | 0.917825507 | 0.971437239 |
| g | MGYG-HGUT-01286 | g | Verticillium                 | 0.006164604  | 0.867850981 | 0.955229514 |
| g | MGYG-HGUT-01286 | g | unclassified Tremellomycetes | 0.133533512  | 0.000294155 | 0.029645172 |
| g | MGYG-HGUT-01286 | g | Candida                      | 0.03433392   | 0.353941431 | 0.705388488 |
| g | MGYG-HGUT-01286 | g | Cladosporium                 | 0.070232311  | 0.057700517 | 0.407963088 |
| g | MGYG-HGUT-01286 | g | Debaryomyces                 | -0.015034807 | 0.684872261 | 0.888914297 |
| g | MGYG-HGUT-01286 | g | Aspergillus                  | -0.033216659 | 0.369831108 | 0.71692327  |
| g | MGYG-HGUT-01286 | g | Kazachstania                 | -0.027863205 | 0.451934026 | 0.76468047  |
| g | MGYG-HGUT-01286 | g | Malassezia                   | 0.046379297  | 0.210392939 | 0.599092342 |
| g | MGYG-HGUT-01286 | g | unclassified Fungi           | -0.020018383 | 0.588945218 | 0.84209243  |
| g | MGYG-HGUT-01286 | g | Mycosphaerella               | -0.042682654 | 0.249090293 | 0.63134694  |
| g | MGYG-HGUT-01286 | g | Simplicillium                | 0.030916128  | 0.403915496 | 0.736936858 |
| g | MGYG-HGUT-01286 | g | unclassified Cordycipitaceae | 0.033614284  | 0.364126096 | 0.71368445  |
| g | MGYG-HGUT-01286 | g | unidentified                 | -0.056626548 | 0.1261108   | 0.51233112  |
| g | MGYG-HGUT-02026 | g | Verticillium                 | 0.031957933  | 0.388253647 | 0.727941193 |
| g | MGYG-HGUT-02026 | g | unclassified Tremellomycetes | 0.048231182  | 0.192727231 | 0.581782946 |
| g | MGYG-HGUT-02026 | g | Candida                      | 0.006437515  | 0.862057933 | 0.953015155 |
| g | MGYG-HGUT-02026 | g | Cladosporium                 | 0.027278908  | 0.461478159 | 0.769075712 |
| g | MGYG-HGUT-02026 | g | Debaryomyces                 | -0.083795336 | 0.023470728 | 0.285827384 |
| g | MGYG-HGUT-02026 | g | Aspergillus                  | 0.021114253  | 0.568709644 | 0.831112479 |
| g | MGYG-HGUT-02026 | g | Kazachstania                 | 0.030162799  | 0.415472187 | 0.743848203 |
| g | MGYG-HGUT-02026 | g | Malassezia                   | 0.032660356  | 0.377905257 | 0.721449293 |
| g | MGYG-HGUT-02026 | g | unclassified Fungi           | 0.102454873  | 0.005560489 | 0.144218377 |
| g | MGYG-HGUT-02026 | g | Mycosphaerella               | -0.001854948 | 0.960069429 | 0.985114701 |
| g | MGYG-HGUT-02026 | g | Simplicillium                | 0.02645288   | 0.475160495 | 0.776548009 |
| g | MGYG-HGUT-02026 | g | unclassified Cordycipitaceae | 0.052750514  | 0.154224393 | 0.552098283 |
| g | MGYG-HGUT-02026 | g | unidentified                 | 0.006581982  | 0.858994317 | 0.952294782 |
| g | MGYG-HGUT-04074 | g | Verticillium                 | 0.065453513  | 0.076971397 | 0.448519452 |
| g | MGYG-HGUT-04074 | g | unclassified Tremellomycetes | -0.035115499 | 0.343085779 | 0.695270538 |
| g | MGYG-HGUT-04074 | g | Candida                      | -0.018296611 | 0.621390611 | 0.856123107 |
| g | MGYG-HGUT-04074 | g | Cladosporium                 | 0.040298887  | 0.276533789 | 0.654063603 |
| g | MGYG-HGUT-04074 | g | Debaryomyces                 | -0.072006061 | 0.0516519   | 0.389025202 |
| g | MGYG-HGUT-04074 | g | Aspergillus                  | 0.029589899  | 0.424390004 | 0.747983848 |
| g | MGYG-HGUT-04074 | g | Kazachstania                 | -0.016944725 | 0.647395392 | 0.869052143 |
| g | MGYG-HGUT-04074 | g | Malassezia                   | 0.030151512  | 0.415646799 | 0.743848203 |
| g | MGYG-HGUT-04074 | g | unclassified Fungi           | 0.025866631  | 0.485009767 | 0.781659055 |
| g | MGYG-HGUT-04074 | g | Mycosphaerella               | -0.02792407  | 0.450946282 | 0.764111513 |
| g | MGYG-HGUT-04074 | g | Simplicillium                | 0.021596769  | 0.559906209 | 0.826119284 |
| g | MGYG-HGUT-04074 | g | unclassified Cordycipitaceae | 0.124395854  | 0.000749946 | 0.050547343 |
| g | MGYG-HGUT-04074 | g | unidentified                 | -0.032632598 | 0.378310956 | 0.721666439 |
| g | MGYG-HGUT-03819 | g | Verticillium                 | 0.03304795   | 0.372268372 | 0.717941299 |
| g | MGYG-HGUT-03819 | g | unclassified Tremellomycetes | 0.01303472   | 0.724964481 | 0.906744053 |
| g | MGYG-HGUT-03819 | g | Candida                      | 0.03073998   | 0.406600404 | 0.738420989 |
| g | MGYG-HGUT-03819 | g | Cladosporium                 | 0.052018643  | 0.160029281 | 0.557138085 |
| g | MGYG-HGUT-03819 | g | Debaryomyces                 | -0.132242426 | 0.000336978 | 0.0321046   |
| g | MGYG-HGUT-03819 | g | Aspergillus                  | 0.052187898  | 0.158672382 | 0.555064843 |
| g | MGYG-HGUT-03819 | g | Kazachstania                 | -0.042942142 | 0.246221794 | 0.629434951 |
| g | MGYG-HGUT-03819 | g | Malassezia                   | 0.006139985  | 0.868373917 | 0.955273867 |
| g | MGYG-HGUT-03819 | g | unclassified Fungi           | 0.030164164  | 0.415451072 | 0.743848203 |
| g | MGYG-HGUT-03819 | g | Mycosphaerella               | -0.0545649   | 0.140523256 | 0.534513693 |
| g | MGYG-HGUT-03819 | g | Simplicillium                | -0.04070417  | 0.271728244 | 0.649109772 |
| g | MGYG-HGUT-03819 | g | unclassified Cordycipitaceae | 0.055526233  | 0.133652878 | 0.52246574  |
| g | MGYG-HGUT-03819 | g | unidentified                 | -0.003402783 | 0.926822054 | 0.974172444 |
| g | MGYG-HGUT-02071 | g | Verticillium                 | 0.012305987  | 0.739768223 | 0.908870682 |
| g | MGYG-HGUT-02071 | g | unclassified Tremellomycetes | 0.079713483  | 0.031165269 | 0.319255451 |
| g | MGYG-HGUT-02071 | g | Candida                      | 0.005189807  | 0.888598605 | 0.962573397 |
| g | MGYG-HGUT-02071 | g | Cladosporium                 | 0.003517661  | 0.924358856 | 0.974172444 |
| g | MGYG-HGUT-02071 | g | Debaryomyces                 | -0.028891948 | 0.435403855 | 0.755318622 |
| g | MGYG-HGUT-02071 | g | Aspergillus                  | -0.011333252 | 0.759678715 | 0.913900538 |
| g | MGYG-HGUT-02071 | g | Kazachstania                 | 0.019922697  | 0.590727721 | 0.842463713 |
| g | MGYG-HGUT-02071 | g | Malassezia                   | 0.045928517  | 0.214864697 | 0.602304164 |
| g | MGYG-HGUT-02071 | g | unclassified Fungi           | 0.028508318  | 0.44152706  | 0.75910048  |
| g | MGYG-HGUT-02071 | g | Mycosphaerella               | 0.037198368  | 0.315205522 | 0.675194937 |
| g | MGYG-HGUT-02071 | g | Simplicillium                | 0.042257585  | 0.253839411 | 0.634509259 |
| g | MGYG-HGUT-02071 | g | unclassified Cordycipitaceae | 0.010125446  | 0.784622386 | 0.923685117 |
| g | MGYG-HGUT-02071 | g | unidentified                 | -0.05348159  | 0.148586646 | 0.544702547 |
| g | MGYG-HGUT-03850 | g | Verticillium                 | 0.023384035  | 0.527884418 | 0.808944748 |
| g | MGYG-HGUT-03850 | g | unclassified Tremellomycetes | 0.008967589  | 0.808743942 | 0.933478229 |
| g | MGYG-HGUT-03850 | g | Candida                      | -0.062776263 | 0.089876214 | 0.467772773 |
| g | MGYG-HGUT-03850 | g | Cladosporium                 | 0.049409575  | 0.18206749  | 0.575010893 |
| g | MGYG-HGUT-03850 | g | Debaryomyces                 | -0.10928359  | 0.003091297 | 0.109405036 |
| g | MGYG-HGUT-03850 | g | Aspergillus                  | 0.019595784  | 0.596836292 | 0.845704558 |
| g | MGYG-HGUT-03850 | g | Kazachstania                 | -0.05072147  | 0.170720633 | 0.564974052 |

|                    |                                |              |             |             |
|--------------------|--------------------------------|--------------|-------------|-------------|
| g MGYG-HGUT-03850  | g Malassezia                   | 0.047943526  | 0.195397525 | 0.584691625 |
| g MGYG-HGUT-03850  | g unclassified Fungi           | 0.033392858  | 0.367296242 | 0.716103178 |
| g MGYG-HGUT-03850  | g Mycosphaerella               | -0.040351414 | 0.275907719 | 0.653459149 |
| g MGYG-HGUT-03850  | g Simplicillium                | -0.013596419 | 0.713623185 | 0.902579029 |
| g MGYG-HGUT-03850  | g unclassified Cordycipitaceae | 0.041655271  | 0.26067595  | 0.638638484 |
| g MGYG-HGUT-03850  | g unidentified                 | -0.005612011 | 0.879602184 | 0.959304186 |
| g MGYG-HGUT-02068  | g Verticillium                 | 0.05382554   | 0.145989197 | 0.540957635 |
| g MGYG-HGUT-02068  | g unclassified Tremellomycetes | 0.048579215  | 0.189532368 | 0.579494803 |
| g MGYG-HGUT-02068  | g Candida                      | 0.010442424  | 0.778053571 | 0.920957818 |
| g MGYG-HGUT-02068  | g Cladosporium                 | 0.0780775    | 0.034807362 | 0.33242916  |
| g MGYG-HGUT-02068  | g Debaryomyces                 | -0.114314185 | 0.001964299 | 0.084840998 |
| g MGYG-HGUT-02068  | g Aspergillus                  | 0.05699906   | 0.123633778 | 0.508632924 |
| g MGYG-HGUT-02068  | g Kazachstania                 | -0.04868853  | 0.188536969 | 0.578390625 |
| g MGYG-HGUT-02068  | g Malassezia                   | 0.078090153  | 0.034777859 | 0.33242916  |
| g MGYG-HGUT-02068  | g unclassified Fungi           | 0.057075626  | 0.123129378 | 0.508016722 |
| g MGYG-HGUT-02068  | g Mycosphaerella               | -0.025960633 | 0.483418548 | 0.780640177 |
| g MGYG-HGUT-02068  | g Simplicillium                | 0.026731968  | 0.470512996 | 0.773732482 |
| g MGYG-HGUT-02068  | g unclassified Cordycipitaceae | 0.073355961  | 0.047411737 | 0.377185783 |
| g MGYG-HGUT-02068  | g unidentified                 | -0.019573994 | 0.59724446  | 0.845894072 |
| g MGYG-HGUT-00377  | g Verticillium                 | 0.02625153   | 0.478529034 | 0.780181171 |
| g MGYG-HGUT-00377  | g unclassified Tremellomycetes | 0.01038981   | 0.77914283  | 0.921314364 |
| g MGYG-HGUT-00377  | g Candida                      | 0.033524449  | 0.365410199 | 0.714085083 |
| g MGYG-HGUT-00377  | g Cladosporium                 | 0.048036907  | 0.194527723 | 0.584077193 |
| g MGYG-HGUT-00377  | g Debaryomyces                 | -0.082100082 | 0.026439792 | 0.300845027 |
| g MGYG-HGUT-00377  | g Aspergillus                  | 0.088626453  | 0.016538422 | 0.250706068 |
| g MGYG-HGUT-00377  | g Kazachstania                 | 0.008064247  | 0.827691257 | 0.939989934 |
| g MGYG-HGUT-00377  | g Malassezia                   | 0.060912073  | 0.09984814  | 0.478320958 |
| g MGYG-HGUT-00377  | g unclassified Fungi           | 0.048204403  | 0.192974687 | 0.581782946 |
| g MGYG-HGUT-00377  | g Mycosphaerella               | 0.001410735  | 0.969626447 | 0.988914748 |
| g MGYG-HGUT-00377  | g Simplicillium                | 0.012529459  | 0.735217999 | 0.907315107 |
| g MGYG-HGUT-00377  | g unclassified Cordycipitaceae | 0.072470775  | 0.050157783 | 0.385192726 |
| g MGYG-HGUT-00377  | g unidentified                 | -0.005381049 | 0.884521741 | 0.961776517 |
| g MGYG-HGUT-00895  | g Verticillium                 | 0.013148089  | 0.722670494 | 0.905819874 |
| g MGYG-HGUT-00895  | g unclassified Tremellomycetes | 0.085203614  | 0.021228284 | 0.278255687 |
| g MGYG-HGUT-00895  | g Candida                      | 0.024110094  | 0.515147231 | 0.802518289 |
| g MGYG-HGUT-00895  | g Cladosporium                 | 0.05224955   | 0.158180293 | 0.554768804 |
| g MGYG-HGUT-00895  | g Debaryomyces                 | -0.048749501 | 0.187983453 | 0.578099651 |
| g MGYG-HGUT-00895  | g Aspergillus                  | 0.006490543  | 0.860933165 | 0.953015155 |
| g MGYG-HGUT-00895  | g Kazachstania                 | -0.034844551 | 0.346824796 | 0.698003041 |
| g MGYG-HGUT-00895  | g Malassezia                   | 0.046002434  | 0.214126793 | 0.601852711 |
| g MGYG-HGUT-00895  | g unclassified Fungi           | 0.01299348   | 0.725799567 | 0.906885231 |
| g MGYG-HGUT-00895  | g Mycosphaerella               | -0.000694488 | 0.98504473  | 0.994062877 |
| g MGYG-HGUT-00895  | g Simplicillium                | 0.032028558  | 0.387205448 | 0.727203277 |
| g MGYG-HGUT-00895  | g unclassified Cordycipitaceae | 0.044863107  | 0.225704379 | 0.612568284 |
| g MGYG-HGUT-00895  | g unidentified                 | -0.04547361  | 0.219446297 | 0.60663028  |
| g Faecalibacterium | g Verticillium                 | -0.063544574 | 0.086006477 | 0.461755726 |
| g Faecalibacterium | g unclassified Tremellomycetes | 0.101325427  | 0.006108342 | 0.148686802 |
| g Faecalibacterium | g Candida                      | 0.005621661  | 0.879396735 | 0.959304186 |
| g Faecalibacterium | g Cladosporium                 | 0.003463338  | 0.925523549 | 0.974172444 |
| g Faecalibacterium | g Debaryomyces                 | -0.068943488 | 0.062454793 | 0.418263405 |
| g Faecalibacterium | g Aspergillus                  | -0.033625569 | 0.363964983 | 0.713515619 |
| g Faecalibacterium | g Kazachstania                 | -0.053383057 | 0.149337203 | 0.545678967 |
| g Faecalibacterium | g Malassezia                   | -0.01275093  | 0.730717643 | 0.907315107 |
| g Faecalibacterium | g unclassified Fungi           | -0.005146493 | 0.889522386 | 0.962882845 |
| g Faecalibacterium | g Mycosphaerella               | -0.063689505 | 0.085291785 | 0.46036635  |
| g Faecalibacterium | g Simplicillium                | -0.001942356 | 0.958189521 | 0.984847119 |
| g Faecalibacterium | g unclassified Cordycipitaceae | 0.003036826  | 0.934673458 | 0.976793554 |
| g Faecalibacterium | g unidentified                 | -0.004759451 | 0.897783493 | 0.965250198 |
| g Ruminococcus D   | g Verticillium                 | 0.026187713  | 0.479599372 | 0.780189053 |
| g Ruminococcus D   | g unclassified Tremellomycetes | -0.05015093  | 0.175588642 | 0.570838406 |
| g Ruminococcus D   | g Candida                      | -0.036679145 | 0.322012552 | 0.679081423 |
| g Ruminococcus D   | g Cladosporium                 | 0.025372805  | 0.49338109  | 0.787044217 |
| g Ruminococcus D   | g Debaryomyces                 | -0.141977616 | 0.000117344 | 0.018409489 |
| g Ruminococcus D   | g Aspergillus                  | -0.000367569 | 0.992084351 | 0.996941403 |
| g Ruminococcus D   | g Kazachstania                 | -0.051174438 | 0.166928179 | 0.562908051 |
| g Ruminococcus D   | g Malassezia                   | 0.013415609  | 0.717267185 | 0.903293001 |
| g Ruminococcus D   | g unclassified Fungi           | 0.080841413  | 0.028848704 | 0.31117391  |
| g Ruminococcus D   | g Mycosphaerella               | -0.009025738 | 0.80752797  | 0.933092485 |
| g Ruminococcus D   | g Simplicillium                | -0.074543151 | 0.043927841 | 0.365142621 |
| g Ruminococcus D   | g unclassified Cordycipitaceae | 0.010693394  | 0.772863858 | 0.918101184 |
| g Ruminococcus D   | g unidentified                 | 0.076177885  | 0.039485585 | 0.349272046 |
| g Gemmiger         | g Verticillium                 | 0.009641996  | 0.794670422 | 0.928168036 |
| g Gemmiger         | g unclassified Tremellomycetes | 0.027487804  | 0.458053141 | 0.767141961 |
| g Gemmiger         | g Candida                      | -0.037591246 | 0.310118039 | 0.6723354   |
| g Gemmiger         | g Cladosporium                 | 0.051190362  | 0.166796011 | 0.562650744 |
| g Gemmiger         | g Debaryomyces                 | -0.090228213 | 0.014674843 | 0.234251137 |
| g Gemmiger         | g Aspergillus                  | 0.022422038  | 0.545003907 | 0.816215242 |
| g Gemmiger         | g Kazachstania                 | -0.034172807 | 0.356205834 | 0.707051645 |

|                    |                                |              |             |             |
|--------------------|--------------------------------|--------------|-------------|-------------|
| g Gemmiger         | g Malassezia                   | 0.015420906  | 0.677229663 | 0.884796861 |
| g Gemmiger         | g unclassified Fungi           | 0.078394839  | 0.03407381  | 0.329231974 |
| g Gemmiger         | g Mycosphaerella               | -0.039958254 | 0.280617213 | 0.657094722 |
| g Gemmiger         | g Simplicillium                | -0.00351237  | 0.924472287 | 0.974172444 |
| g Gemmiger         | g unclassified Cordycipitaceae | 0.025680676  | 0.488149639 | 0.783616425 |
| g Gemmiger         | g unidentified                 | 0.002955289  | 0.936423665 | 0.977345273 |
| g UBA1394          | g Verticillium                 | 0.086374462  | 0.019508071 | 0.26949661  |
| g UBA1394          | g unclassified Tremellomycetes | -0.068667582 | 0.063513496 | 0.421193    |
| g UBA1394          | g Candida                      | -0.046060393 | 0.213549471 | 0.601212885 |
| g UBA1394          | g Cladosporium                 | 0.028441893  | 0.442592259 | 0.759625242 |
| g UBA1394          | g Debaryomyces                 | -0.073207099 | 0.047864515 | 0.377704921 |
| g UBA1394          | g Aspergillus                  | 0.085190429  | 0.021248382 | 0.282255687 |
| g UBA1394          | g Kazachstania                 | -0.047301945 | 0.201450585 | 0.590022167 |
| g UBA1394          | g Malassezia                   | 0.078588669  | 0.033632277 | 0.327713401 |
| g UBA1394          | g unclassified Fungi           | 0.045829408  | 0.21585697  | 0.603186168 |
| g UBA1394          | g Mycosphaerella               | -0.026385249 | 0.476290491 | 0.777950599 |
| g UBA1394          | g Simplicillium                | 0.030021839  | 0.41765608  | 0.744673402 |
| g UBA1394          | g unclassified Cordycipitaceae | 0.093484453  | 0.011446807 | 0.208127335 |
| g UBA1394          | g unidentified                 | -0.020200663 | 0.585556464 | 0.840031499 |
| g Ruthenibacterium | g Verticillium                 | 0.072565819  | 0.0498567   | 0.385192726 |
| g Ruthenibacterium | g unclassified Tremellomycetes | -0.002932086 | 0.936921786 | 0.977563755 |
| g Ruthenibacterium | g Candida                      | -0.042309841 | 0.253252206 | 0.634299372 |
| g Ruthenibacterium | g Cladosporium                 | 0.045433953  | 0.219849003 | 0.607083027 |
| g Ruthenibacterium | g Debaryomyces                 | -0.084755554 | 0.021920643 | 0.282194948 |
| g Ruthenibacterium | g Aspergillus                  | 0.024368937  | 0.510645192 | 0.799135489 |
| g Ruthenibacterium | g Kazachstania                 | -0.020207037 | 0.585438131 | 0.840014414 |
| g Ruthenibacterium | g Malassezia                   | 0.048192544  | 0.19308434  | 0.581804506 |
| g Ruthenibacterium | g unclassified Fungi           | 0.034985772  | 0.344872763 | 0.696679266 |
| g Ruthenibacterium | g Mycosphaerella               | -0.011570575 | 0.754805808 | 0.911600966 |
| g Ruthenibacterium | g Simplicillium                | -0.001171481 | 0.974775765 | 0.990490577 |
| g Ruthenibacterium | g unclassified Cordycipitaceae | 0.108605632  | 0.003281622 | 0.112382279 |
| g Ruthenibacterium | g unidentified                 | -0.007969275 | 0.8296893   | 0.940630371 |
| g Angelakisella    | g Verticillium                 | 0.038826802  | 0.29447299  | 0.663406003 |
| g Angelakisella    | g unclassified Tremellomycetes | -0.06691143  | 0.070604054 | 0.439536772 |
| g Angelakisella    | g Candida                      | -0.018685717 | 0.613990559 | 0.852976464 |
| g Angelakisella    | g Cladosporium                 | -0.022621937 | 0.541424018 | 0.815797943 |
| g Angelakisella    | g Debaryomyces                 | -0.137773248 | 0.000186648 | 0.022444453 |
| g Angelakisella    | g Aspergillus                  | 0.043895086  | 0.235886079 | 0.619698732 |
| g Angelakisella    | g Kazachstania                 | -0.036722622 | 0.321438918 | 0.67847037  |
| g Angelakisella    | g Malassezia                   | 0.028305655  | 0.444781585 | 0.76170364  |
| g Angelakisella    | g unclassified Fungi           | 0.06505865   | 0.078774084 | 0.45101344  |
| g Angelakisella    | g Mycosphaerella               | -0.041503559 | 0.262417805 | 0.640547841 |
| g Angelakisella    | g Simplicillium                | -0.016048612 | 0.664875407 | 0.879024433 |
| g Angelakisella    | g unclassified Cordycipitaceae | 0.023090232  | 0.533083723 | 0.811490628 |
| g Angelakisella    | g unidentified                 | 0.037944312  | 0.305592508 | 0.670074578 |
| g MGYG-HGUT-02689  | g Verticillium                 | 0.042006763  | 0.256671072 | 0.636617051 |
| g MGYG-HGUT-02689  | g unclassified Tremellomycetes | -0.009065109 | 0.806704947 | 0.932627175 |
| g MGYG-HGUT-02689  | g Candida                      | -0.02245398  | 0.544431083 | 0.816215242 |
| g MGYG-HGUT-02689  | g Cladosporium                 | 0.012751495  | 0.730706178 | 0.907315107 |
| g MGYG-HGUT-02689  | g Debaryomyces                 | -0.039251938 | 0.289214031 | 0.660061436 |
| g MGYG-HGUT-02689  | g Aspergillus                  | 0.088836248  | 0.016283085 | 0.249950122 |
| g MGYG-HGUT-02689  | g Kazachstania                 | 0.012115695  | 0.743650024 | 0.909574751 |
| g MGYG-HGUT-02689  | g Malassezia                   | 0.057237718  | 0.122066847 | 0.506577845 |
| g MGYG-HGUT-02689  | g unclassified Fungi           | 0.054337036  | 0.142190807 | 0.537187832 |
| g MGYG-HGUT-02689  | g Mycosphaerella               | 0.020814256  | 0.574216117 | 0.834664141 |
| g MGYG-HGUT-02689  | g Simplicillium                | -0.011830934 | 0.749471071 | 0.910387945 |
| g MGYG-HGUT-02689  | g unclassified Cordycipitaceae | 0.071452165  | 0.053481125 | 0.396592334 |
| g MGYG-HGUT-02689  | g unidentified                 | 0.026697672  | 0.47108275  | 0.77381206  |
| g UBA866           | g Verticillium                 | 0.086019152  | 0.020016772 | 0.271909474 |
| g UBA866           | g unclassified Tremellomycetes | -0.086914683 | 0.018756227 | 0.26570066  |
| g UBA866           | g Candida                      | -0.049554099 | 0.180790773 | 0.575010893 |
| g UBA866           | g Cladosporium                 | 0.038660052  | 0.296553061 | 0.665138721 |
| g UBA866           | g Debaryomyces                 | -0.121844798 | 0.000963449 | 0.05906749  |
| g UBA866           | g Aspergillus                  | 0.007840149  | 0.832407639 | 0.941418308 |
| g UBA866           | g Kazachstania                 | -0.054177739 | 0.143365545 | 0.538440191 |
| g UBA866           | g Malassezia                   | 0.081848528  | 0.026906864 | 0.304522392 |
| g UBA866           | g unclassified Fungi           | 0.060500577  | 0.102163787 | 0.480915121 |
| g UBA866           | g Mycosphaerella               | -0.014169817 | 0.702110484 | 0.897212331 |
| g UBA866           | g Simplicillium                | -0.005477416 | 0.882468537 | 0.960639915 |
| g UBA866           | g unclassified Cordycipitaceae | 0.058433903  | 0.114445416 | 0.497329568 |
| g UBA866           | g unidentified                 | 0.050511258  | 0.17250235  | 0.566309615 |
| g Anaerotruncus    | g Verticillium                 | 0.036178378  | 0.328667655 | 0.684206732 |
| g Anaerotruncus    | g unclassified Tremellomycetes | -0.032968443 | 0.373420397 | 0.718484102 |
| g Anaerotruncus    | g Candida                      | -0.033811331 | 0.361319374 | 0.711875184 |
| g Anaerotruncus    | g Cladosporium                 | 0.066305881  | 0.073194353 | 0.443355619 |
| g Anaerotruncus    | g Debaryomyces                 | -0.120078314 | 0.001142823 | 0.0648952   |
| g Anaerotruncus    | g Aspergillus                  | 0.058236324  | 0.115677854 | 0.498413294 |
| g Anaerotruncus    | g Kazachstania                 | -0.03090462  | 0.404090582 | 0.737129209 |

|                   |                                |              |             |             |
|-------------------|--------------------------------|--------------|-------------|-------------|
| g Anaerotruncus   | g Malassezia                   | 0.051977145  | 0.160363297 | 0.557261178 |
| g Anaerotruncus   | g unclassified Fungi           | 0.013163103  | 0.722366872 | 0.905687198 |
| g Anaerotruncus   | g Mycosphaerella               | -0.045673779 | 0.217421747 | 0.60514212  |
| g Anaerotruncus   | g Simplicillium                | -0.037033564 | 0.317355812 | 0.6759781   |
| g Anaerotruncus   | g unclassified Cordycipitaceae | 0.079961346  | 0.030642982 | 0.315608804 |
| g Anaerotruncus   | g unidentified                 | 0.003927765  | 0.915571481 | 0.971437239 |
| g Neobitarella    | g Verticillium                 | 0.023231334  | 0.530583475 | 0.811128912 |
| g Neobitarella    | g unclassified Tremellomycetes | -0.002967185 | 0.936168294 | 0.977345273 |
| g Neobitarella    | g Candida                      | 0.001657541  | 0.964315912 | 0.987171422 |
| g Neobitarella    | g Cladosporium                 | 0.000797934  | 0.982817412 | 0.993395456 |
| g Neobitarella    | g Debaryomyces                 | 0.02318955   | 0.531323232 | 0.811448513 |
| g Neobitarella    | g Aspergillus                  | -0.051012272 | 0.168278579 | 0.563459023 |
| g Neobitarella    | g Kazachstania                 | 0.032954395  | 0.373624184 | 0.718484102 |
| g Neobitarella    | g Malassezia                   | 0.029054518  | 0.432823857 | 0.754104067 |
| g Neobitarella    | g unclassified Fungi           | -0.02652311  | 0.473988633 | 0.775471198 |
| g Neobitarella    | g Mycosphaerella               | 0.033338737  | 0.368073701 | 0.71614358  |
| g Neobitarella    | g Simplicillium                | -0.014639818 | 0.692724264 | 0.893516353 |
| g Neobitarella    | g unclassified Cordycipitaceae | 0.03909298   | 0.291172913 | 0.660774558 |
| g Neobitarella    | g unidentified                 | -0.030388792 | 0.411984957 | 0.742316502 |
| g Phoceae         | g Verticillium                 | 0.038528348  | 0.298202869 | 0.666157944 |
| g Phoceae         | g unclassified Tremellomycetes | -0.009907783 | 0.789141976 | 0.92590092  |
| g Phoceae         | g Candida                      | -0.011530237 | 0.755633382 | 0.911989902 |
| g Phoceae         | g Cladosporium                 | 0.053490964  | 0.148515388 | 0.544702547 |
| g Phoceae         | g Debaryomyces                 | -0.074322089 | 0.044559709 | 0.367235858 |
| g Phoceae         | g Aspergillus                  | 0.109187703  | 0.003117591 | 0.109967836 |
| g Phoceae         | g Kazachstania                 | 0.059240887  | 0.109518473 | 0.492584069 |
| g Phoceae         | g Malassezia                   | 0.048217476  | 0.192853852 | 0.581782946 |
| g Phoceae         | g unclassified Fungi           | 0.058437386  | 0.114423784 | 0.497329568 |
| g Phoceae         | g Mycosphaerella               | -0.036988502 | 0.317945424 | 0.676223819 |
| g Phoceae         | g Simplicillium                | -0.027850172 | 0.452145691 | 0.76468047  |
| g Phoceae         | g unclassified Cordycipitaceae | 0.064878467  | 0.079607995 | 0.45101344  |
| g Phoceae         | g unidentified                 | -0.042535746 | 0.250724579 | 0.632007503 |
| g MGYG-HGUT-04022 | g Verticillium                 | 0.051463216  | 0.1645436   | 0.561723687 |
| g MGYG-HGUT-04022 | g unclassified Tremellomycetes | -0.00917626  | 0.804382567 | 0.931596653 |
| g MGYG-HGUT-04022 | g Candida                      | -0.018253738 | 0.622208332 | 0.856123107 |
| g MGYG-HGUT-04022 | g Cladosporium                 | -0.027680382 | 0.454908296 | 0.765814499 |
| g MGYG-HGUT-04022 | g Debaryomyces                 | -0.113508787 | 0.002114748 | 0.0877579   |
| g MGYG-HGUT-04022 | g Aspergillus                  | 0.118186278  | 0.00136875  | 0.072060275 |
| g MGYG-HGUT-04022 | g Kazachstania                 | -0.018676217 | 0.614170782 | 0.853019454 |
| g MGYG-HGUT-04022 | g Malassezia                   | 0.030698052  | 0.407241059 | 0.738420989 |
| g MGYG-HGUT-04022 | g unclassified Fungi           | 0.105425576  | 0.00432446  | 0.127469181 |
| g MGYG-HGUT-04022 | g Mycosphaerella               | 0.017862094  | 0.629699638 | 0.859818244 |
| g MGYG-HGUT-04022 | g Simplicillium                | -0.041714922 | 0.259993272 | 0.638398936 |
| g MGYG-HGUT-04022 | g unclassified Cordycipitaceae | 0.032781104  | 0.376143576 | 0.720164886 |
| g MGYG-HGUT-04022 | g unidentified                 | 0.045742917  | 0.216725594 | 0.604422504 |
| g Fournierella    | g Verticillium                 | 0.024417773  | 0.509798101 | 0.798892628 |
| g Fournierella    | g unclassified Tremellomycetes | 0.023091779  | 0.533056279 | 0.811490628 |
| g Fournierella    | g Candida                      | -0.009488886 | 0.79785984  | 0.929475004 |
| g Fournierella    | g Cladosporium                 | 0.075266182  | 0.041913657 | 0.357109759 |
| g Fournierella    | g Debaryomyces                 | -0.117043029 | 0.001524496 | 0.075384204 |
| g Fournierella    | g Aspergillus                  | 0.015755589  | 0.670631528 | 0.881311835 |
| g Fournierella    | g Kazachstania                 | -0.018723052 | 0.613282564 | 0.852887587 |
| g Fournierella    | g Malassezia                   | 0.074483913  | 0.044096416 | 0.365142621 |
| g Fournierella    | g unclassified Fungi           | -0.001576112 | 0.966067858 | 0.988104588 |
| g Fournierella    | g Mycosphaerella               | -0.027883047 | 0.451611887 | 0.764510797 |
| g Fournierella    | g Simplicillium                | 0.009787876  | 0.79163478  | 0.926770576 |
| g Fournierella    | g unclassified Cordycipitaceae | 0.06346634   | 0.086394264 | 0.462664019 |
| g Fournierella    | g unidentified                 | -0.011752918 | 0.751068384 | 0.910387945 |
| g Ruminococcus C  | g Verticillium                 | 0.004817982  | 0.896533452 | 0.965118718 |
| g Ruminococcus C  | g unclassified Tremellomycetes | -0.056247355 | 0.128671691 | 0.515954465 |
| g Ruminococcus C  | g Candida                      | -0.037528368 | 0.310928608 | 0.672399691 |
| g Ruminococcus C  | g Cladosporium                 | 0.032713812  | 0.377124725 | 0.720869551 |
| g Ruminococcus C  | g Debaryomyces                 | -0.141990617 | 0.000117174 | 0.018409489 |
| g Ruminococcus C  | g Aspergillus                  | 0.113155256  | 0.00218406  | 0.088979156 |
| g Ruminococcus C  | g Kazachstania                 | -0.067346422 | 0.068790027 | 0.436936412 |
| g Ruminococcus C  | g Malassezia                   | -0.022213773 | 0.548746038 | 0.817643267 |
| g Ruminococcus C  | g unclassified Fungi           | 0.143298572  | 0.00010115  | 0.018409489 |
| g Ruminococcus C  | g Mycosphaerella               | -0.032617313 | 0.378534461 | 0.721666439 |
| g Ruminococcus C  | g Simplicillium                | -0.053130001 | 0.151278033 | 0.548039761 |
| g Ruminococcus C  | g unclassified Cordycipitaceae | 0.01566684   | 0.672378733 | 0.881783585 |
| g Ruminococcus C  | g unidentified                 | 0.075883271  | 0.040256837 | 0.350685903 |
| g Ruminococcus    | g Verticillium                 | 0.052316636  | 0.15764614  | 0.55423489  |
| g Ruminococcus    | g unclassified Tremellomycetes | -0.079964765 | 0.03063583  | 0.315608804 |
| g Ruminococcus    | g Candida                      | -0.084874037 | 0.021735678 | 0.280496278 |
| g Ruminococcus    | g Cladosporium                 | 0.105658784  | 0.004238847 | 0.126141964 |
| g Ruminococcus    | g Debaryomyces                 | -0.109435659 | 0.00305001  | 0.108306058 |
| g Ruminococcus    | g Aspergillus                  | 0.038920691  | 0.293306112 | 0.662256281 |
| g Ruminococcus    | g Kazachstania                 | -0.039365972 | 0.287814219 | 0.659362601 |



|                       |                                |              |             |             |
|-----------------------|--------------------------------|--------------|-------------|-------------|
| g Ruminococcus        | g Malassezia                   | 0.075140636  | 0.042257695 | 0.358790655 |
| g Ruminococcus        | g unclassified Fungi           | 0.023939779  | 0.518120688 | 0.803768376 |
| g Ruminococcus        | g Mycosphaerella               | -0.041102512 | 0.267060932 | 0.644840157 |
| g Ruminococcus        | g Simplicillium                | 0.006294531  | 0.865092116 | 0.954571392 |
| g Ruminococcus        | g unclassified Cordycipitaceae | 0.058181854  | 0.116019446 | 0.499275223 |
| g Ruminococcus        | g unidentified                 | 0.02806238   | 0.448706244 | 0.762723397 |
| g MGYG-HGUT-03337     | g Verticillium                 | 0.047629191  | 0.198346307 | 0.58591995  |
| g MGYG-HGUT-03337     | g unclassified Tremellomycetes | -0.041403896 | 0.263566426 | 0.641845793 |
| g MGYG-HGUT-03337     | g Candida                      | -0.046580965 | 0.208414285 | 0.597903264 |
| g MGYG-HGUT-03337     | g Cladosporium                 | 0.046660247  | 0.207640119 | 0.597890541 |
| g MGYG-HGUT-03337     | g Debaryomyces                 | -0.115147226 | 0.001819057 | 0.083377853 |
| g MGYG-HGUT-03337     | g Aspergillus                  | 0.060013679  | 0.104958617 | 0.48522153  |
| g MGYG-HGUT-03337     | g Kazachstania                 | 0.008250009  | 0.823786394 | 0.939162206 |
| g MGYG-HGUT-03337     | g Malassezia                   | 0.071125601  | 0.054584668 | 0.399257624 |
| g MGYG-HGUT-03337     | g unclassified Fungi           | 0.067174927  | 0.069500588 | 0.438815765 |
| g MGYG-HGUT-03337     | g Mycosphaerella               | 0.016918832  | 0.647897822 | 0.869505992 |
| g MGYG-HGUT-03337     | g Simplicillium                | -0.041286763 | 0.264920805 | 0.64234852  |
| g MGYG-HGUT-03337     | g unclassified Cordycipitaceae | 0.044282639  | 0.231771521 | 0.61716312  |
| g MGYG-HGUT-03337     | g unidentified                 | 0.093177445  | 0.011721703 | 0.210950784 |
| g Massilioclostridium | g Verticillium                 | -0.003140355 | 0.932451612 | 0.976183382 |
| g Massilioclostridium | g unclassified Tremellomycetes | -0.010963487 | 0.767289986 | 0.916616044 |
| g Massilioclostridium | g Candida                      | -0.031466952 | 0.395588236 | 0.731875892 |
| g Massilioclostridium | g Cladosporium                 | 0.024943956  | 0.500717877 | 0.792254272 |
| g Massilioclostridium | g Debaryomyces                 | -0.114394169 | 0.001949906 | 0.084840998 |
| g Massilioclostridium | g Aspergillus                  | 0.073977537  | 0.045559805 | 0.370793362 |
| g Massilioclostridium | g Kazachstania                 | -0.016395133 | 0.658093748 | 0.874757951 |
| g Massilioclostridium | g Malassezia                   | -0.015553321 | 0.674616167 | 0.883385485 |
| g Massilioclostridium | g unclassified Fungi           | 0.032486735  | 0.380447202 | 0.722837319 |
| g Massilioclostridium | g Mycosphaerella               | -0.07666779  | 0.038230813 | 0.344012295 |
| g Massilioclostridium | g Simplicillium                | -0.039850652 | 0.281915572 | 0.657094722 |
| g Massilioclostridium | g unclassified Cordycipitaceae | 0.052340091  | 0.157459709 | 0.55423489  |
| g Massilioclostridium | g unidentified                 | -0.032718698 | 0.377053439 | 0.720869551 |
| g UBA3818             | g Verticillium                 | 0.038726742  | 0.295719976 | 0.66439677  |
| g UBA3818             | g unclassified Tremellomycetes | 0.006912577  | 0.851991656 | 0.949400054 |
| g UBA3818             | g Candida                      | -0.03804429  | 0.304318993 | 0.670057703 |
| g UBA3818             | g Cladosporium                 | 0.029805935  | 0.421014124 | 0.74604389  |
| g UBA3818             | g Debaryomyces                 | -0.112299836 | 0.002360452 | 0.09226991  |
| g UBA3818             | g Aspergillus                  | -0.012435426 | 0.737131531 | 0.90779094  |
| g UBA3818             | g Kazachstania                 | -0.022213336 | 0.548753903 | 0.817643267 |
| g UBA3818             | g Malassezia                   | 0.055497275  | 0.133855969 | 0.522487595 |
| g UBA3818             | g unclassified Fungi           | 0.040410172  | 0.275208531 | 0.653130896 |
| g UBA3818             | g Mycosphaerella               | -0.056753553 | 0.125261984 | 0.511192563 |
| g UBA3818             | g Simplicillium                | 0.013368708  | 0.718213458 | 0.903594675 |
| g UBA3818             | g unclassified Cordycipitaceae | 0.042238197  | 0.254057513 | 0.634663977 |
| g UBA3818             | g unidentified                 | -0.005328729 | 0.885636793 | 0.96210924  |
| g Ruminiclostridium E | g Verticillium                 | 0.111823278  | 0.002464275 | 0.093801199 |
| g Ruminiclostridium E | g unclassified Tremellomycetes | -0.040123456 | 0.278631728 | 0.655800922 |
| g Ruminiclostridium E | g Candida                      | -0.005392976 | 0.88426757  | 0.961776517 |
| g Ruminiclostridium E | g Cladosporium                 | -0.039825131 | 0.282224108 | 0.657094722 |
| g Ruminiclostridium E | g Debaryomyces                 | -0.115961059 | 0.001686738 | 0.080765002 |
| g Ruminiclostridium E | g Aspergillus                  | 0.02722931   | 0.462293463 | 0.769075712 |
| g Ruminiclostridium E | g Kazachstania                 | -0.020706066 | 0.576208124 | 0.836045579 |
| g Ruminiclostridium E | g Malassezia                   | 0.060146713  | 0.104189048 | 0.483989688 |
| g Ruminiclostridium E | g unclassified Fungi           | 0.068800384  | 0.063002077 | 0.420099469 |
| g Ruminiclostridium E | g Mycosphaerella               | -0.017794299 | 0.631000316 | 0.860229872 |
| g Ruminiclostridium E | g Simplicillium                | -0.01702767  | 0.645787013 | 0.868076943 |
| g Ruminiclostridium E | g unclassified Cordycipitaceae | 0.073852644  | 0.045926947 | 0.372462992 |
| g Ruminiclostridium E | g unidentified                 | 0.032873536  | 0.374798449 | 0.719150896 |
| g Provencibacterium   | g Verticillium                 | 0.031614656  | 0.393373    | 0.730757316 |
| g Provencibacterium   | g unclassified Tremellomycetes | 0.006124559  | 0.868701609 | 0.955273867 |
| g Provencibacterium   | g Candida                      | 0.006040174  | 0.870494595 | 0.955832776 |
| g Provencibacterium   | g Cladosporium                 | 0.025538334  | 0.490564644 | 0.785229929 |
| g Provencibacterium   | g Debaryomyces                 | -0.10430563  | 0.004757804 | 0.136073204 |
| g Provencibacterium   | g Aspergillus                  | 0.071560876  | 0.053117913 | 0.395562105 |
| g Provencibacterium   | g Kazachstania                 | -0.033309519 | 0.368493838 | 0.71614358  |
| g Provencibacterium   | g Malassezia                   | 0.030434607  | 0.411280126 | 0.74205734  |
| g Provencibacterium   | g unclassified Fungi           | 0.066810276  | 0.071031453 | 0.441367716 |
| g Provencibacterium   | g Mycosphaerella               | -0.045478144 | 0.219400298 | 0.60663028  |
| g Provencibacterium   | g Simplicillium                | 0.004720957  | 0.898605731 | 0.965643451 |
| g Provencibacterium   | g unclassified Cordycipitaceae | 0.038496354  | 0.298604579 | 0.666350413 |
| g Provencibacterium   | g unidentified                 | -0.034928011 | 0.345670325 | 0.697400798 |
| g Ruminococcus F      | g Verticillium                 | 0.055621136  | 0.132988944 | 0.521431795 |
| g Ruminococcus F      | g unclassified Tremellomycetes | -0.069525746 | 0.060268332 | 0.412830947 |
| g Ruminococcus F      | g Candida                      | -0.057065772 | 0.123194206 | 0.508044073 |
| g Ruminococcus F      | g Cladosporium                 | 0.023968766  | 0.517613982 | 0.803761519 |
| g Ruminococcus F      | g Debaryomyces                 | -0.125340383 | 0.000682703 | 0.047912298 |
| g Ruminococcus F      | g Aspergillus                  | 0.09005068   | 0.014871866 | 0.236297424 |
| g Ruminococcus F      | g Kazachstania                 | -0.018632957 | 0.614991694 | 0.853151823 |

|                    |                                |              |             |             |
|--------------------|--------------------------------|--------------|-------------|-------------|
| g Ruminococcus F   | g Malassezia                   | 0.021995329  | 0.552684623 | 0.820336555 |
| g Ruminococcus F   | g unclassified Fungi           | 0.076911782  | 0.037618612 | 0.342509087 |
| g Ruminococcus F   | g Mycosphaerella               | 0.001943051  | 0.958174572 | 0.984847119 |
| g Ruminococcus F   | g Simplicillium                | -0.054268085 | 0.142698377 | 0.537761478 |
| g Ruminococcus F   | g unclassified Cordycipitaceae | 0.052542923  | 0.155854452 | 0.553069016 |
| g Ruminococcus F   | g unidentified                 | 0.073850554  | 0.045933113 | 0.372462992 |
| g Negativibacillus | g Verticillium                 | 0.021167444  | 0.567735959 | 0.830492386 |
| g Negativibacillus | g unclassified Tremellomycetes | 0.007193445  | 0.846051445 | 0.947820248 |
| g Negativibacillus | g Candida                      | -0.024489597 | 0.508553609 | 0.798383435 |
| g Negativibacillus | g Cladosporium                 | 0.02729992   | 0.461133006 | 0.769075712 |
| g Negativibacillus | g Debaryomyces                 | -0.124117247 | 0.000770923 | 0.051090495 |
| g Negativibacillus | g Aspergillus                  | 0.053507307  | 0.148391223 | 0.544667334 |
| g Negativibacillus | g Kazachstania                 | -0.026909079 | 0.467576701 | 0.772746627 |
| g Negativibacillus | g Malassezia                   | 0.03636918   | 0.326121499 | 0.682288988 |
| g Negativibacillus | g unclassified Fungi           | 0.07183238   | 0.05221977  | 0.391907523 |
| g Negativibacillus | g Mycosphaerella               | -0.000530868 | 0.988567887 | 0.995529633 |
| g Negativibacillus | g Simplicillium                | -0.003655609 | 0.921401932 | 0.973422096 |
| g Negativibacillus | g unclassified Cordycipitaceae | 0.015095584  | 0.68366706  | 0.888296381 |
| g Negativibacillus | g unidentified                 | 0.044952372  | 0.224781498 | 0.612060698 |
| g CAG-353          | g Verticillium                 | 0.05893581   | 0.11136104  | 0.49451218  |
| g CAG-353          | g unclassified Tremellomycetes | -0.070256094 | 0.057615689 | 0.407963088 |
| g CAG-353          | g Candida                      | -0.062747814 | 0.090022145 | 0.467796257 |
| g CAG-353          | g Cladosporium                 | 0.013934626  | 0.706824594 | 0.900365443 |
| g CAG-353          | g Debaryomyces                 | -0.138780583 | 0.000167204 | 0.02175193  |
| g CAG-353          | g Aspergillus                  | 0.084145851  | 0.022894223 | 0.283684623 |
| g CAG-353          | g Kazachstania                 | -0.057901766 | 0.117788439 | 0.502447147 |
| g CAG-353          | g Malassezia                   | 0.03840534   | 0.299749268 | 0.667321362 |
| g CAG-353          | g unclassified Fungi           | 0.08294649   | 0.024919201 | 0.293646975 |
| g CAG-353          | g Mycosphaerella               | -0.007526724 | 0.839014078 | 0.944525909 |
| g CAG-353          | g Simplicillium                | -0.042720866 | 0.248666427 | 0.63117969  |
| g CAG-353          | g unclassified Cordycipitaceae | 0.048432504  | 0.190874365 | 0.580402598 |
| g CAG-353          | g unidentified                 | 0.045621632  | 0.217947875 | 0.605493413 |
| g MGYG-HGUT-02089  | g Verticillium                 | 0.018187356  | 0.623475362 | 0.856841954 |
| g MGYG-HGUT-02089  | g unclassified Tremellomycetes | -0.049174509 | 0.184158279 | 0.57604579  |
| g MGYG-HGUT-02089  | g Candida                      | -0.026550053 | 0.473539488 | 0.775272518 |
| g MGYG-HGUT-02089  | g Cladosporium                 | 0.017378565  | 0.639001174 | 0.86388896  |
| g MGYG-HGUT-02089  | g Debaryomyces                 | -0.137849211 | 0.000185111 | 0.022444453 |
| g MGYG-HGUT-02089  | g Aspergillus                  | 0.116247081  | 0.001642374 | 0.079918721 |
| g MGYG-HGUT-02089  | g Kazachstania                 | -0.041981635 | 0.256955951 | 0.63694258  |
| g MGYG-HGUT-02089  | g Malassezia                   | 0.023846332  | 0.519755886 | 0.804200383 |
| g MGYG-HGUT-02089  | g unclassified Fungi           | 0.064283337  | 0.082413355 | 0.455217912 |
| g MGYG-HGUT-02089  | g Mycosphaerella               | -0.027091308 | 0.464566168 | 0.770539057 |
| g MGYG-HGUT-02089  | g Simplicillium                | -0.025397647 | 0.492957853 | 0.786680742 |
| g MGYG-HGUT-02089  | g unclassified Cordycipitaceae | 0.021055069  | 0.569793972 | 0.831953372 |
| g MGYG-HGUT-02089  | g unidentified                 | 0.054700618  | 0.139537205 | 0.533896229 |
| g MGYG-HGUT-03583  | g Verticillium                 | 0.052764192  | 0.154117446 | 0.552027333 |
| g MGYG-HGUT-03583  | g unclassified Tremellomycetes | -0.077969914 | 0.035059091 | 0.333329108 |
| g MGYG-HGUT-03583  | g Candida                      | -0.010930679 | 0.767966416 | 0.916616044 |
| g MGYG-HGUT-03583  | g Cladosporium                 | 0.067988674  | 0.066181707 | 0.428176217 |
| g MGYG-HGUT-03583  | g Debaryomyces                 | -0.102801218 | 0.005401587 | 0.141484151 |
| g MGYG-HGUT-03583  | g Aspergillus                  | 0.030949795  | 0.403403541 | 0.736936858 |
| g MGYG-HGUT-03583  | g Kazachstania                 | -0.067609496 | 0.067711611 | 0.43452048  |
| g MGYG-HGUT-03583  | g Malassezia                   | 0.013650478  | 0.712534958 | 0.902091837 |
| g MGYG-HGUT-03583  | g unclassified Fungi           | 0.11522872   | 0.001805391 | 0.083377853 |
| g MGYG-HGUT-03583  | g Mycosphaerella               | -0.01052619  | 0.7763203   | 0.920244362 |
| g MGYG-HGUT-03583  | g Simplicillium                | -0.031484563 | 0.395323722 | 0.731604691 |
| g MGYG-HGUT-03583  | g unclassified Cordycipitaceae | 0.041338974  | 0.264316514 | 0.642342032 |
| g MGYG-HGUT-03583  | g unidentified                 | 0.105585841  | 0.004265458 | 0.126348985 |
| g Massilimoniales  | g Verticillium                 | 0.031248113  | 0.398884143 | 0.734026611 |
| g Massilimoniales  | g unclassified Tremellomycetes | -0.030764823 | 0.406221107 | 0.738222664 |
| g Massilimoniales  | g Candida                      | -0.009697148 | 0.793522375 | 0.927338904 |
| g Massilimoniales  | g Cladosporium                 | 0.067665925  | 0.067482108 | 0.433776817 |
| g Massilimoniales  | g Debaryomyces                 | -0.149869279 | 4.74E-05    | 0.013389478 |
| g Massilimoniales  | g Aspergillus                  | 0.025014632  | 0.499504773 | 0.791370491 |
| g Massilimoniales  | g Kazachstania                 | -0.00254406  | 0.945255334 | 0.980291673 |
| g Massilimoniales  | g Malassezia                   | 0.075891543  | 0.040235009 | 0.350685903 |
| g Massilimoniales  | g unclassified Fungi           | 0.066440134  | 0.072613477 | 0.442493968 |
| g Massilimoniales  | g Mycosphaerella               | -0.005112288 | 0.890251999 | 0.962904765 |
| g Massilimoniales  | g Simplicillium                | -0.031790342 | 0.390747878 | 0.729773041 |
| g Massilimoniales  | g unclassified Cordycipitaceae | 0.069445051  | 0.06056752  | 0.412830947 |
| g Massilimoniales  | g unidentified                 | 0.042109123  | 0.255512839 | 0.635647844 |
| g QANG01           | g Verticillium                 | 0.031759219  | 0.391212152 | 0.729890405 |
| g QANG01           | g unclassified Tremellomycetes | -0.005791245 | 0.875787633 | 0.957691922 |
| g QANG01           | g Candida                      | -0.041120256 | 0.266854319 | 0.644840157 |
| g QANG01           | g Cladosporium                 | 0.038531528  | 0.298162963 | 0.666157944 |
| g QANG01           | g Debaryomyces                 | -0.126658213 | 0.000598194 | 0.046422777 |
| g QANG01           | g Aspergillus                  | 0.074721243  | 0.0434243   | 0.363506278 |
| g QANG01           | g Kazachstania                 | -0.03256912  | 0.379239719 | 0.722533174 |

|                   |                                |              |             |             |
|-------------------|--------------------------------|--------------|-------------|-------------|
| g QANG01          | g Malassezia                   | 0.04570842   | 0.21707275  | 0.604649603 |
| g QANG01          | g unclassified Fungi           | 0.047842681  | 0.196340033 | 0.585259221 |
| g QANG01          | g Mycosphaerella               | 0.017347643  | 0.639597951 | 0.86388896  |
| g QANG01          | g Simplicillium                | -0.04620767  | 0.212087502 | 0.600680647 |
| g QANG01          | g unclassified Cordycipitaceae | 0.054895862  | 0.138128008 | 0.530937371 |
| g QANG01          | g unidentified                 | 0.035231693  | 0.341490234 | 0.694699556 |
| g Bittarella      | g Verticillium                 | 0.027170396  | 0.463262933 | 0.769100777 |
| g Bittarella      | g unclassified Tremellomycetes | 0.030410266  | 0.411654501 | 0.742316502 |
| g Bittarella      | g Candida                      | -0.015522821 | 0.675217802 | 0.883535895 |
| g Bittarella      | g Cladosporium                 | 0.078273998  | 0.034351573 | 0.330746506 |
| g Bittarella      | g Debaryomyces                 | -0.112295472 | 0.002361384 | 0.09226991  |
| g Bittarella      | g Aspergillus                  | 0.085715307  | 0.020460917 | 0.275117443 |
| g Bittarella      | g Kazachstania                 | -0.047063256 | 0.203736997 | 0.593377363 |
| g Bittarella      | g Malassezia                   | 0.042152589  | 0.255022119 | 0.635347198 |
| g Bittarella      | g unclassified Fungi           | 0.037065281  | 0.316941236 | 0.675911357 |
| g Bittarella      | g Mycosphaerella               | -0.027314764 | 0.460889266 | 0.769075712 |
| g Bittarella      | g Simplicillium                | -0.010252312 | 0.781991449 | 0.922260522 |
| g Bittarella      | g unclassified Cordycipitaceae | 0.042823039  | 0.247535529 | 0.629733759 |
| g Bittarella      | g unidentified                 | -0.015418996 | 0.6772674   | 0.884796861 |
| g QAMM01          | g Verticillium                 | 0.059914633  | 0.105534498 | 0.486422715 |
| g QAMM01          | g unclassified Tremellomycetes | 0.025894008  | 0.484542212 | 0.781381543 |
| g QAMM01          | g Candida                      | -0.02051585  | 0.579718261 | 0.836998864 |
| g QAMM01          | g Cladosporium                 | 0.083918144  | 0.023267326 | 0.285641852 |
| g QAMM01          | g Debaryomyces                 | -0.050190055 | 0.175251548 | 0.570357274 |
| g QAMM01          | g Aspergillus                  | 0.002870496  | 0.938244104 | 0.977695628 |
| g QAMM01          | g Kazachstania                 | 0.03266849   | 0.377786424 | 0.721374462 |
| g QAMM01          | g Malassezia                   | 0.080336064  | 0.02986764  | 0.313550961 |
| g QAMM01          | g unclassified Fungi           | 0.005865097  | 0.874216708 | 0.957458208 |
| g QAMM01          | g Mycosphaerella               | 0.010956444  | 0.767435185 | 0.916616044 |
| g QAMM01          | g Simplicillium                | 0.012712137  | 0.731505273 | 0.907315107 |
| g QAMM01          | g unclassified Cordycipitaceae | 0.106731537  | 0.003864451 | 0.122075056 |
| g QAMM01          | g unidentified                 | -0.082225368 | 0.026209788 | 0.300469812 |
| g MGYG-HGUT-04104 | g Verticillium                 | 0.04933088   | 0.182765473 | 0.575260034 |
| g MGYG-HGUT-04104 | g unclassified Tremellomycetes | -0.073424021 | 0.047205926 | 0.376645892 |
| g MGYG-HGUT-04104 | g Candida                      | 0.020392832  | 0.581993682 | 0.838368792 |
| g MGYG-HGUT-04104 | g Cladosporium                 | 0.028214072  | 0.446256758 | 0.761832544 |
| g MGYG-HGUT-04104 | g Debaryomyces                 | -0.12643645  | 0.000611699 | 0.046450134 |
| g MGYG-HGUT-04104 | g Aspergillus                  | 0.097499812  | 0.008342621 | 0.17418732  |
| g MGYG-HGUT-04104 | g Kazachstania                 | -0.043067525 | 0.244844066 | 0.628403245 |
| g MGYG-HGUT-04104 | g Malassezia                   | 0.02529842   | 0.494649529 | 0.787688967 |
| g MGYG-HGUT-04104 | g unclassified Fungi           | 0.057483287  | 0.120470754 | 0.505079842 |
| g MGYG-HGUT-04104 | g Mycosphaerella               | -0.03808162  | 0.303844381 | 0.669850258 |
| g MGYG-HGUT-04104 | g Simplicillium                | -0.066978115 | 0.070323446 | 0.439536772 |
| g MGYG-HGUT-04104 | g unclassified Cordycipitaceae | 0.045817555  | 0.215975858 | 0.603186168 |
| g MGYG-HGUT-04104 | g unidentified                 | 0.039698056  | 0.283763807 | 0.658002559 |
| g UBA1409         | g Verticillium                 | 0.053357886  | 0.149529401 | 0.54599626  |
| g UBA1409         | g unclassified Tremellomycetes | -0.013832055 | 0.708884037 | 0.901395203 |
| g UBA1409         | g Candida                      | -0.064388297 | 0.081912859 | 0.453822971 |
| g UBA1409         | g Cladosporium                 | 0.002204935  | 0.952543595 | 0.982725584 |
| g UBA1409         | g Debaryomyces                 | -0.078815113 | 0.033122643 | 0.326657793 |
| g UBA1409         | g Aspergillus                  | 0.024475405  | 0.50879939  | 0.798474736 |
| g UBA1409         | g Kazachstania                 | -0.003593718 | 0.922728429 | 0.973801958 |
| g UBA1409         | g Malassezia                   | 0.058513486  | 0.113951924 | 0.497306733 |
| g UBA1409         | g unclassified Fungi           | 0.021145658  | 0.568134668 | 0.83054176  |
| g UBA1409         | g Mycosphaerella               | -0.063257006 | 0.08743883  | 0.465488609 |
| g UBA1409         | g Simplicillium                | -0.033901334 | 0.360041882 | 0.711344884 |
| g UBA1409         | g unclassified Cordycipitaceae | 0.078169227  | 0.034593959 | 0.331642857 |
| g UBA1409         | g unidentified                 | 0.006962346  | 0.850938445 | 0.949373378 |
| g MGYG-HGUT-03104 | g Verticillium                 | 0.06058399   | 0.101690976 | 0.480456307 |
| g MGYG-HGUT-03104 | g unclassified Tremellomycetes | 0.005878751  | 0.873926342 | 0.957437473 |
| g MGYG-HGUT-03104 | g Candida                      | -0.088608421 | 0.016560531 | 0.250706068 |
| g MGYG-HGUT-03104 | g Cladosporium                 | 0.052570296  | 0.155638764 | 0.552962589 |
| g MGYG-HGUT-03104 | g Debaryomyces                 | -0.121704404 | 0.000976692 | 0.05906749  |
| g MGYG-HGUT-03104 | g Aspergillus                  | 0.049593544  | 0.18044348  | 0.575010893 |
| g MGYG-HGUT-03104 | g Kazachstania                 | -0.025263928 | 0.495238308 | 0.787943433 |
| g MGYG-HGUT-03104 | g Malassezia                   | 0.064579323  | 0.081008279 | 0.452126167 |
| g MGYG-HGUT-03104 | g unclassified Fungi           | 0.095103544  | 0.010089442 | 0.194829327 |
| g MGYG-HGUT-03104 | g Mycosphaerella               | -0.031051831 | 0.401854299 | 0.736155635 |
| g MGYG-HGUT-03104 | g Simplicillium                | 0.015966961  | 0.666477374 | 0.879421986 |
| g MGYG-HGUT-03104 | g unclassified Cordycipitaceae | 0.066189518  | 0.073700888 | 0.444184668 |
| g MGYG-HGUT-03104 | g unidentified                 | 0.049963073  | 0.177213899 | 0.572778705 |
| g CAG-115         | g Verticillium                 | 0.104359297  | 0.004736176 | 0.135821714 |
| g CAG-115         | g unclassified Tremellomycetes | -0.060897869 | 0.099927368 | 0.478320958 |
| g CAG-115         | g Candida                      | -0.047097421 | 0.203408572 | 0.593293691 |
| g CAG-115         | g Cladosporium                 | -0.048700165 | 0.188431247 | 0.578390625 |
| g CAG-115         | g Debaryomyces                 | -0.110553435 | 0.002761605 | 0.100770018 |
| g CAG-115         | g Aspergillus                  | 0.064140558  | 0.083098158 | 0.455435557 |
| g CAG-115         | g Kazachstania                 | -0.065956497 | 0.074723844 | 0.444519981 |

|                   |                                |              |             |             |
|-------------------|--------------------------------|--------------|-------------|-------------|
| g CAG-115         | g Malassezia                   | 0.042025562  | 0.256458078 | 0.63656207  |
| g CAG-115         | g unclassified Fungi           | 0.093106077  | 0.011786438 | 0.211755658 |
| g CAG-115         | g Mycosphaerella               | 0.015334381  | 0.678939526 | 0.885603387 |
| g CAG-115         | g Simplicillium                | 0.029696509  | 0.422722097 | 0.746980426 |
| g CAG-115         | g unclassified Cordycipitaceae | 0.069721393  | 0.059548016 | 0.412336263 |
| g CAG-115         | g unidentified                 | 0.090282276  | 0.014615302 | 0.234251137 |
| g D5              | g Verticillium                 | 0.038102335  | 0.303581227 | 0.669409574 |
| g D5              | g unclassified Tremellomycetes | -0.050508586 | 0.172525081 | 0.566309615 |
| g D5              | g Candida                      | -0.01318045  | 0.722016125 | 0.905686893 |
| g D5              | g Cladosporium                 | -0.01206855  | 0.744612762 | 0.909574751 |
| g D5              | g Debaryomyces                 | -0.135660863 | 0.000234512 | 0.026122166 |
| g D5              | g Aspergillus                  | 0.125176958  | 0.000693922 | 0.047994031 |
| g D5              | g Kazachstania                 | -0.024103127 | 0.515268692 | 0.802518289 |
| g D5              | g Malassezia                   | 0.054643261  | 0.139953282 | 0.533896229 |
| g D5              | g unclassified Fungi           | 0.090381042  | 0.014507079 | 0.233367199 |
| g D5              | g Mycosphaerella               | -0.027365845 | 0.46005102  | 0.769075712 |
| g D5              | g Simplicillium                | -0.055742778 | 0.132141684 | 0.520016102 |
| g D5              | g unclassified Cordycipitaceae | 0.051706801  | 0.16255218  | 0.560460432 |
| g D5              | g unidentified                 | 0.04830337   | 0.192061339 | 0.581297022 |
| g Pygmaibacter    | g Verticillium                 | 0.016219492  | 0.661527693 | 0.876789335 |
| g Pygmaibacter    | g unclassified Tremellomycetes | 0.115094332  | 0.001827978 | 0.083377853 |
| g Pygmaibacter    | g Candida                      | -0.003486915 | 0.925018029 | 0.974172444 |
| g Pygmaibacter    | g Cladosporium                 | 0.086721233  | 0.019022498 | 0.267167825 |
| g Pygmaibacter    | g Debaryomyces                 | -0.040214297 | 0.277544034 | 0.654488559 |
| g Pygmaibacter    | g Aspergillus                  | -0.025449886 | 0.492068482 | 0.785854011 |
| g Pygmaibacter    | g Kazachstania                 | -0.008606092 | 0.81631347  | 0.935683399 |
| g Pygmaibacter    | g Malassezia                   | 0.087526911  | 0.017934857 | 0.260248809 |
| g Pygmaibacter    | g unclassified Fungi           | -0.057791397 | 0.118491285 | 0.502487018 |
| g Pygmaibacter    | g Mycosphaerella               | -0.061862456 | 0.094659555 | 0.473835105 |
| g Pygmaibacter    | g Simplicillium                | 0.030128772  | 0.415998738 | 0.743974758 |
| g Pygmaibacter    | g unclassified Cordycipitaceae | 0.053222425  | 0.15056697  | 0.547902227 |
| g Pygmaibacter    | g unidentified                 | -0.026858029 | 0.468422009 | 0.77312422  |
| g MGYG-HGUT-00450 | g Verticillium                 | 0.033826824  | 0.361099265 | 0.711747526 |
| g MGYG-HGUT-00450 | g unclassified Tremellomycetes | -0.02680772  | 0.46925587  | 0.77312422  |
| g MGYG-HGUT-00450 | g Candida                      | -0.02732581  | 0.460707924 | 0.769075712 |
| g MGYG-HGUT-00450 | g Cladosporium                 | 0.027571785  | 0.456680211 | 0.766834337 |
| g MGYG-HGUT-00450 | g Debaryomyces                 | -0.180311603 | 9.25E-07    | 0.003261777 |
| g MGYG-HGUT-00450 | g Aspergillus                  | 0.108843314  | 0.003213717 | 0.111269104 |
| g MGYG-HGUT-00450 | g Kazachstania                 | -0.029045048 | 0.432973899 | 0.754104067 |
| g MGYG-HGUT-00450 | g Malassezia                   | 0.029451099  | 0.426567267 | 0.749727648 |
| g MGYG-HGUT-00450 | g unclassified Fungi           | 0.035250644  | 0.341230455 | 0.694699556 |
| g MGYG-HGUT-00450 | g Mycosphaerella               | -0.036380781 | 0.325967107 | 0.682100836 |
| g MGYG-HGUT-00450 | g Simplicillium                | -0.039313249 | 0.288460843 | 0.659613931 |
| g MGYG-HGUT-00450 | g unclassified Cordycipitaceae | 0.041309129  | 0.264661822 | 0.64234852  |
| g MGYG-HGUT-00450 | g unidentified                 | 0.073119792  | 0.048131752 | 0.378604998 |
| g MGYG-HGUT-02037 | g Verticillium                 | 0.011275817  | 0.76085947  | 0.914413959 |
| g MGYG-HGUT-02037 | g unclassified Tremellomycetes | 0.02752815   | 0.457393275 | 0.767141961 |
| g MGYG-HGUT-02037 | g Candida                      | -0.037340141 | 0.313363383 | 0.673419608 |
| g MGYG-HGUT-02037 | g Cladosporium                 | 0.017278127  | 0.640940448 | 0.864541339 |
| g MGYG-HGUT-02037 | g Debaryomyces                 | -0.103615253 | 0.005044102 | 0.138908586 |
| g MGYG-HGUT-02037 | g Aspergillus                  | 0.044805856  | 0.226297692 | 0.612967811 |
| g MGYG-HGUT-02037 | g Kazachstania                 | -0.070230406 | 0.057707317 | 0.407963088 |
| g MGYG-HGUT-02037 | g Malassezia                   | 0.008342968  | 0.821833936 | 0.93794723  |
| g MGYG-HGUT-02037 | g unclassified Fungi           | 0.010089588  | 0.785366435 | 0.924135173 |
| g MGYG-HGUT-02037 | g Mycosphaerella               | -0.029553474 | 0.424960743 | 0.748615712 |
| g MGYG-HGUT-02037 | g Simplicillium                | 0.005845126  | 0.874641472 | 0.957673757 |
| g MGYG-HGUT-02037 | g unclassified Cordycipitaceae | 0.050920323  | 0.169047886 | 0.563848296 |
| g MGYG-HGUT-02037 | g unidentified                 | 0.005366149  | 0.884839257 | 0.961818704 |
| g MGYG-HGUT-00537 | g Verticillium                 | 0.006472231  | 0.861321545 | 0.953015155 |
| g MGYG-HGUT-00537 | g unclassified Tremellomycetes | -0.079906957 | 0.030756942 | 0.31599025  |
| g MGYG-HGUT-00537 | g Candida                      | -0.023193799 | 0.531247993 | 0.811448513 |
| g MGYG-HGUT-00537 | g Cladosporium                 | 0.004587559  | 0.901456004 | 0.966538463 |
| g MGYG-HGUT-00537 | g Debaryomyces                 | -0.161552502 | 1.14E-05    | 0.008626179 |
| g MGYG-HGUT-00537 | g Aspergillus                  | 0.062250285  | 0.092605159 | 0.471664958 |
| g MGYG-HGUT-00537 | g Kazachstania                 | -0.048008505 | 0.194791973 | 0.584265492 |
| g MGYG-HGUT-00537 | g Malassezia                   | 0.016361481  | 0.658751119 | 0.874996133 |
| g MGYG-HGUT-00537 | g unclassified Fungi           | 0.061036806  | 0.099154529 | 0.478320958 |
| g MGYG-HGUT-00537 | g Mycosphaerella               | -0.036962504 | 0.318328925 | 0.676223819 |
| g MGYG-HGUT-00537 | g Simplicillium                | -0.023376579 | 0.528016043 | 0.808944748 |
| g MGYG-HGUT-00537 | g unclassified Cordycipitaceae | 0.023424462  | 0.527171012 | 0.80894067  |
| g MGYG-HGUT-00537 | g unidentified                 | 0.060860108  | 0.100138239 | 0.478819278 |
| g MGYG-HGUT-00425 | g Verticillium                 | 0.052932036  | 0.152809657 | 0.549263515 |
| g MGYG-HGUT-00425 | g unclassified Tremellomycetes | -0.091492178 | 0.013337286 | 0.224380221 |
| g MGYG-HGUT-00425 | g Candida                      | -0.084332213 | 0.022592736 | 0.283321191 |
| g MGYG-HGUT-00425 | g Cladosporium                 | -0.003888015 | 0.916422775 | 0.971437239 |
| g MGYG-HGUT-00425 | g Debaryomyces                 | -0.134530534 | 0.000264626 | 0.027872801 |
| g MGYG-HGUT-00425 | g Aspergillus                  | 0.056443426  | 0.127342529 | 0.514840192 |
| g MGYG-HGUT-00425 | g Kazachstania                 | -0.093915743 | 0.011070277 | 0.204069724 |



|   |                 |   |                              |              |             |             |
|---|-----------------|---|------------------------------|--------------|-------------|-------------|
| g | MGYG-HGUT-00425 | g | Malassezia                   | 0.049709345  | 0.179426753 | 0.574257008 |
| g | MGYG-HGUT-00425 | g | unclassified Fungi           | 0.031243494  | 0.398953891 | 0.734026611 |
| g | MGYG-HGUT-00425 | g | Mycosphaerella               | -0.031866897 | 0.389607323 | 0.729445274 |
| g | MGYG-HGUT-00425 | g | Simplicillium                | 0.000404617  | 0.991286535 | 0.996655023 |
| g | MGYG-HGUT-00425 | g | unclassified Cordycipitaceae | 0.05880788   | 0.11214092  | 0.495063318 |
| g | MGYG-HGUT-00425 | g | unidentified                 | 0.061161026  | 0.098467591 | 0.477955684 |
| g | MGYG-HGUT-03299 | g | Verticillium                 | 0.015077477  | 0.684026029 | 0.888360755 |
| g | MGYG-HGUT-03299 | g | unclassified Tremellomycetes | -0.024767706 | 0.503749822 | 0.794793591 |
| g | MGYG-HGUT-03299 | g | Candida                      | -0.021626371 | 0.559368279 | 0.825555806 |
| g | MGYG-HGUT-03299 | g | Cladosporium                 | 0.011916223  | 0.747726106 | 0.910244784 |
| g | MGYG-HGUT-03299 | g | Debaryomyces                 | -0.076412218 | 0.038881111 | 0.345770459 |
| g | MGYG-HGUT-03299 | g | Aspergillus                  | 0.091794428  | 0.013033833 | 0.221742805 |
| g | MGYG-HGUT-03299 | g | Kazachstania                 | 0.007559064  | 0.838331881 | 0.944350433 |
| g | MGYG-HGUT-03299 | g | Malassezia                   | 0.016078172  | 0.664295816 | 0.878587467 |
| g | MGYG-HGUT-03299 | g | unclassified Fungi           | 0.0768695    | 0.037724101 | 0.342509087 |
| g | MGYG-HGUT-03299 | g | Mycosphaerella               | -0.036456102 | 0.324965838 | 0.68148801  |
| g | MGYG-HGUT-03299 | g | Simplicillium                | -0.009131845 | 0.805310362 | 0.931649092 |
| g | MGYG-HGUT-03299 | g | unclassified Cordycipitaceae | 0.042016404  | 0.256561825 | 0.63656207  |
| g | MGYG-HGUT-03299 | g | unidentified                 | 0.034912595  | 0.345883372 | 0.697400798 |
| g | MGYG-HGUT-03826 | g | Verticillium                 | 0.046587068  | 0.208354623 | 0.597903264 |
| g | MGYG-HGUT-03826 | g | unclassified Tremellomycetes | -0.087689665 | 0.017721867 | 0.259019368 |
| g | MGYG-HGUT-03826 | g | Candida                      | -0.087194641 | 0.018376645 | 0.26243138  |
| g | MGYG-HGUT-03826 | g | Cladosporium                 | -0.037833917 | 0.307002806 | 0.670803983 |
| g | MGYG-HGUT-03826 | g | Debaryomyces                 | -0.075418711 | 0.041498866 | 0.355867911 |
| g | MGYG-HGUT-03826 | g | Aspergillus                  | 0.039618333  | 0.284732656 | 0.658096791 |
| g | MGYG-HGUT-03826 | g | Kazachstania                 | 0.001587336  | 0.965826356 | 0.988048579 |
| g | MGYG-HGUT-03826 | g | Malassezia                   | 0.000467254  | 0.989937711 | 0.996055991 |
| g | MGYG-HGUT-03826 | g | unclassified Fungi           | 0.004415169  | 0.905141244 | 0.967495419 |
| g | MGYG-HGUT-03826 | g | Mycosphaerella               | -0.017737828 | 0.632084605 | 0.860617511 |
| g | MGYG-HGUT-03826 | g | Simplicillium                | -0.046137038 | 0.212787736 | 0.600680647 |
| g | MGYG-HGUT-03826 | g | unclassified Cordycipitaceae | 0.054631035  | 0.140042094 | 0.533896229 |
| g | MGYG-HGUT-03826 | g | unidentified                 | 0.01913251   | 0.60554161  | 0.84989123  |
| g | MGYG-HGUT-01987 | g | Verticillium                 | 0.060118976  | 0.104349127 | 0.484458693 |
| g | MGYG-HGUT-01987 | g | unclassified Tremellomycetes | -0.108612005 | 0.003279785 | 0.112382279 |
| g | MGYG-HGUT-01987 | g | Candida                      | -0.035120208 | 0.343021029 | 0.695270538 |
| g | MGYG-HGUT-01987 | g | Cladosporium                 | -0.075626167 | 0.040940274 | 0.354132002 |
| g | MGYG-HGUT-01987 | g | Debaryomyces                 | -0.142375028 | 0.000112232 | 0.018409489 |
| g | MGYG-HGUT-01987 | g | Aspergillus                  | 0.056997972  | 0.123640958 | 0.508632924 |
| g | MGYG-HGUT-01987 | g | Kazachstania                 | -0.071287054 | 0.054036731 | 0.397628223 |
| g | MGYG-HGUT-01987 | g | Malassezia                   | 0.017881127  | 0.629334689 | 0.859818244 |
| g | MGYG-HGUT-01987 | g | unclassified Fungi           | 0.051354378  | 0.165439302 | 0.562504371 |
| g | MGYG-HGUT-01987 | g | Mycosphaerella               | -0.039019237 | 0.292084678 | 0.660859538 |
| g | MGYG-HGUT-01987 | g | Simplicillium                | -0.010136657 | 0.78438978  | 0.923685117 |
| g | MGYG-HGUT-01987 | g | unclassified Cordycipitaceae | 0.024991602  | 0.499899897 | 0.791370491 |
| g | MGYG-HGUT-01987 | g | unidentified                 | 0.06212778   | 0.09325019  | 0.472099996 |
| g | MGYG-HGUT-02221 | g | Verticillium                 | 0.055510739  | 0.133761512 | 0.522487595 |
| g | MGYG-HGUT-02221 | g | unclassified Tremellomycetes | -0.065928782 | 0.074846278 | 0.444519981 |
| g | MGYG-HGUT-02221 | g | Candida                      | -0.050632839 | 0.171470165 | 0.565255978 |
| g | MGYG-HGUT-02221 | g | Cladosporium                 | 0.023067776  | 0.533482168 | 0.811502452 |
| g | MGYG-HGUT-02221 | g | Debaryomyces                 | -0.117743651 | 0.001427225 | 0.072960835 |
| g | MGYG-HGUT-02221 | g | Aspergillus                  | 0.037154457  | 0.315777508 | 0.675194937 |
| g | MGYG-HGUT-02221 | g | Kazachstania                 | -0.057094887 | 0.123002744 | 0.508016722 |
| g | MGYG-HGUT-02221 | g | Malassezia                   | 0.039759264  | 0.283021475 | 0.657890287 |
| g | MGYG-HGUT-02221 | g | unclassified Fungi           | 0.051266706  | 0.166163476 | 0.562541523 |
| g | MGYG-HGUT-02221 | g | Mycosphaerella               | -0.004950823 | 0.893697374 | 0.964392857 |
| g | MGYG-HGUT-02221 | g | Simplicillium                | -0.000781884 | 0.983162976 | 0.993395456 |
| g | MGYG-HGUT-02221 | g | unclassified Cordycipitaceae | 0.04160331   | 0.261271632 | 0.639254662 |
| g | MGYG-HGUT-02221 | g | unidentified                 | 0.04878317   | 0.187678308 | 0.577701512 |
| g | MGYG-HGUT-02039 | g | Verticillium                 | 0.062769265  | 0.089912098 | 0.467772773 |
| g | MGYG-HGUT-02039 | g | unclassified Tremellomycetes | 0.006618388  | 0.858222611 | 0.952142599 |
| g | MGYG-HGUT-02039 | g | Candida                      | -0.046074009 | 0.213414001 | 0.601103796 |
| g | MGYG-HGUT-02039 | g | Cladosporium                 | 0.065620473  | 0.076219327 | 0.4465963   |
| g | MGYG-HGUT-02039 | g | Debaryomyces                 | -0.118249712 | 0.001360553 | 0.07198687  |
| g | MGYG-HGUT-02039 | g | Aspergillus                  | 0.091001733  | 0.013842954 | 0.227462943 |
| g | MGYG-HGUT-02039 | g | Kazachstania                 | -0.003098996 | 0.933339159 | 0.976431995 |
| g | MGYG-HGUT-02039 | g | Malassezia                   | 0.081864338  | 0.026877299 | 0.304513472 |
| g | MGYG-HGUT-02039 | g | unclassified Fungi           | 0.091976791  | 0.012853707 | 0.221076037 |
| g | MGYG-HGUT-02039 | g | Mycosphaerella               | -0.021775213 | 0.55666731  | 0.823205698 |
| g | MGYG-HGUT-02039 | g | Simplicillium                | 0.002601971  | 0.944011195 | 0.979845657 |
| g | MGYG-HGUT-02039 | g | unclassified Cordycipitaceae | 0.067012362  | 0.070179688 | 0.439536772 |
| g | MGYG-HGUT-02039 | g | unidentified                 | -0.02885864  | 0.435933546 | 0.755741937 |
| g | MGYG-HGUT-02965 | g | Verticillium                 | 0.009033169  | 0.807372616 | 0.933092485 |
| g | MGYG-HGUT-02965 | g | unclassified Tremellomycetes | 0.031024901  | 0.402262844 | 0.736461144 |
| g | MGYG-HGUT-02965 | g | Candida                      | -0.061454184 | 0.096861454 | 0.477459115 |
| g | MGYG-HGUT-02965 | g | Cladosporium                 | 0.025737487  | 0.48718755  | 0.783154405 |
| g | MGYG-HGUT-02965 | g | Debaryomyces                 | -0.084276965 | 0.022681752 | 0.283321191 |
| g | MGYG-HGUT-02965 | g | Aspergillus                  | 0.020057011  | 0.588226341 | 0.841827972 |
| g | MGYG-HGUT-02965 | g | Kazachstania                 | -0.00475674  | 0.8978414   | 0.965250198 |

|                   |                                |              |             |             |
|-------------------|--------------------------------|--------------|-------------|-------------|
| g MGYG-HGUT-02965 | g Malassezia                   | 0.042652896  | 0.249420737 | 0.631653529 |
| g MGYG-HGUT-02965 | g unclassified Fungi           | 0.011975478  | 0.746514533 | 0.909815242 |
| g MGYG-HGUT-02965 | g Mycosphaerella               | -0.063201915 | 0.087715413 | 0.465488609 |
| g MGYG-HGUT-02965 | g Simplicillium                | -0.028099628 | 0.44810407  | 0.762502994 |
| g MGYG-HGUT-02965 | g unclassified Cordycipitaceae | 0.021318327  | 0.564978294 | 0.829039606 |
| g MGYG-HGUT-02965 | g unidentified                 | -0.024620068 | 0.506296995 | 0.796460015 |
| g MGYG-HGUT-00663 | g Verticillium                 | 0.052706786  | 0.154566677 | 0.552146547 |
| g MGYG-HGUT-00663 | g unclassified Tremellomycetes | -0.059624517 | 0.107235705 | 0.488444035 |
| g MGYG-HGUT-00663 | g Candida                      | -0.04033735  | 0.276075251 | 0.653563378 |
| g MGYG-HGUT-00663 | g Cladosporium                 | 0.030598369  | 0.408766577 | 0.740172471 |
| g MGYG-HGUT-00663 | g Debaryomyces                 | -0.14067846  | 0.000135628 | 0.018928692 |
| g MGYG-HGUT-00663 | g Aspergillus                  | 0.09203248   | 0.01279914  | 0.221076037 |
| g MGYG-HGUT-00663 | g Kazachstania                 | -0.009080403 | 0.806385301 | 0.932387299 |
| g MGYG-HGUT-00663 | g Malassezia                   | 0.051442188  | 0.164716368 | 0.561723687 |
| g MGYG-HGUT-00663 | g unclassified Fungi           | 0.085611714  | 0.020614293 | 0.27577806  |
| g MGYG-HGUT-00663 | g Mycosphaerella               | -0.004149403 | 0.910826614 | 0.969560969 |
| g MGYG-HGUT-00663 | g Simplicillium                | -0.015404829 | 0.677547254 | 0.884796861 |
| g MGYG-HGUT-00663 | g unclassified Cordycipitaceae | 0.051086121  | 0.167662606 | 0.563342385 |
| g MGYG-HGUT-00663 | g unidentified                 | 0.060746173  | 0.100776643 | 0.478858752 |
| g UBA946          | g Verticillium                 | 0.09469112   | 0.010420884 | 0.196917494 |
| g UBA946          | g unclassified Tremellomycetes | -0.122468253 | 0.000906623 | 0.05779451  |
| g UBA946          | g Candida                      | -0.061381025 | 0.097260304 | 0.477459115 |
| g UBA946          | g Cladosporium                 | -0.03028502  | 0.413584083 | 0.742811081 |
| g UBA946          | g Debaryomyces                 | -0.12577961  | 0.000653378 | 0.047356494 |
| g UBA946          | g Aspergillus                  | 0.083286947  | 0.02432922  | 0.290250059 |
| g UBA946          | g Kazachstania                 | -0.052113863 | 0.159264836 | 0.555851086 |
| g UBA946          | g Malassezia                   | 0.049020554  | 0.185537212 | 0.576715352 |
| g UBA946          | g unclassified Fungi           | 0.080357325  | 0.029824159 | 0.313550961 |
| g UBA946          | g Mycosphaerella               | -0.0122247   | 0.741425619 | 0.909337726 |
| g UBA946          | g Simplicillium                | 0.007912294  | 0.830888608 | 0.940950929 |
| g UBA946          | g unclassified Cordycipitaceae | 0.046682855  | 0.207419738 | 0.597418526 |
| g UBA946          | g unidentified                 | 0.070976395  | 0.055095147 | 0.400940701 |
| g MGYG-HGUT-02105 | g Verticillium                 | 0.005459889  | 0.882841905 | 0.96085406  |
| g MGYG-HGUT-02105 | g unclassified Tremellomycetes | 0.028740027  | 0.437822829 | 0.756909193 |
| g MGYG-HGUT-02105 | g Candida                      | -0.020331902 | 0.583122207 | 0.83896658  |
| g MGYG-HGUT-02105 | g Cladosporium                 | 0.003963804  | 0.914799752 | 0.971343666 |
| g MGYG-HGUT-02105 | g Debaryomyces                 | -0.060081424 | 0.104566168 | 0.484602449 |
| g MGYG-HGUT-02105 | g Aspergillus                  | 0.027310999  | 0.460951074 | 0.769075712 |
| g MGYG-HGUT-02105 | g Kazachstania                 | -0.061112633 | 0.09873475  | 0.477955684 |
| g MGYG-HGUT-02105 | g Malassezia                   | 0.025431719  | 0.49237768  | 0.786058196 |
| g MGYG-HGUT-02105 | g unclassified Fungi           | -0.024066524 | 0.515907056 | 0.802695096 |
| g MGYG-HGUT-02105 | g Mycosphaerella               | -0.060750915 | 0.100750011 | 0.478858752 |
| g MGYG-HGUT-02105 | g Simplicillium                | 0.03903789   | 0.29185387  | 0.660859538 |
| g MGYG-HGUT-02105 | g unclassified Cordycipitaceae | 0.014365834  | 0.698190297 | 0.895302916 |
| g MGYG-HGUT-02105 | g unidentified                 | 0.009814908  | 0.791072598 | 0.926624392 |
| g MGYG-HGUT-01725 | g Verticillium                 | 0.05161163   | 0.163328075 | 0.561148601 |
| g MGYG-HGUT-01725 | g unclassified Tremellomycetes | -0.012326978 | 0.739340412 | 0.908570461 |
| g MGYG-HGUT-01725 | g Candida                      | 0.04526744   | 0.221545634 | 0.608144203 |
| g MGYG-HGUT-01725 | g Cladosporium                 | 0.046616509  | 0.208066951 | 0.597903264 |
| g MGYG-HGUT-01725 | g Debaryomyces                 | 0.010526288  | 0.776318272 | 0.920244362 |
| g MGYG-HGUT-01725 | g Aspergillus                  | 0.062497741  | 0.091313118 | 0.470392034 |
| g MGYG-HGUT-01725 | g Kazachstania                 | 0.028123335  | 0.447721054 | 0.762502994 |
| g MGYG-HGUT-01725 | g Malassezia                   | 0.008347831  | 0.821731825 | 0.937931849 |
| g MGYG-HGUT-01725 | g unclassified Fungi           | 0.034729182  | 0.34842469  | 0.700197127 |
| g MGYG-HGUT-01725 | g Mycosphaerella               | 0.027232074  | 0.462248002 | 0.769075712 |
| g MGYG-HGUT-01725 | g Simplicillium                | 0.00104342   | 0.977532394 | 0.991604689 |
| g MGYG-HGUT-01725 | g unclassified Cordycipitaceae | 0.04922052   | 0.183747644 | 0.575925162 |
| g MGYG-HGUT-01725 | g unidentified                 | -0.01887505  | 0.610403896 | 0.851291399 |
| g HUN007          | g Verticillium                 | 0.078799355  | 0.033157894 | 0.326700964 |
| g HUN007          | g unclassified Tremellomycetes | -0.094257013 | 0.010780162 | 0.200484494 |
| g HUN007          | g Candida                      | -0.044919756 | 0.22511839  | 0.612068957 |
| g HUN007          | g Cladosporium                 | -0.002220053 | 0.952218599 | 0.982634054 |
| g HUN007          | g Debaryomyces                 | -0.093912459 | 0.011073102 | 0.204069724 |
| g HUN007          | g Aspergillus                  | 0.055953912  | 0.130681009 | 0.517833494 |
| g HUN007          | g Kazachstania                 | -0.048709646 | 0.188345132 | 0.5783715   |
| g HUN007          | g Malassezia                   | 0.065187491  | 0.078182146 | 0.450222934 |
| g HUN007          | g unclassified Fungi           | 0.055915282  | 0.13094732  | 0.518206634 |
| g HUN007          | g Mycosphaerella               | -0.00646933  | 0.861383066 | 0.953015155 |
| g HUN007          | g Simplicillium                | -0.016453995 | 0.65694454  | 0.87431013  |
| g HUN007          | g unclassified Cordycipitaceae | 0.069048912  | 0.062054128 | 0.417170577 |
| g HUN007          | g unidentified                 | 0.11810178   | 0.00137974  | 0.07227925  |
| g MGYG-HGUT-00466 | g Verticillium                 | 0.069616197  | 0.059934427 | 0.412830947 |
| g MGYG-HGUT-00466 | g unclassified Tremellomycetes | -0.024497202 | 0.508421915 | 0.798383435 |
| g MGYG-HGUT-00466 | g Candida                      | -0.009806511 | 0.791247213 | 0.926624392 |
| g MGYG-HGUT-00466 | g Cladosporium                 | 0.016986204  | 0.646590857 | 0.868192419 |
| g MGYG-HGUT-00466 | g Debaryomyces                 | -0.160064829 | 1.37E-05    | 0.008626179 |
| g MGYG-HGUT-00466 | g Aspergillus                  | 0.058584666  | 0.113511961 | 0.496972931 |
| g MGYG-HGUT-00466 | g Kazachstania                 | -0.006835693 | 0.853619202 | 0.949742235 |

|                   |                                |              |             |             |
|-------------------|--------------------------------|--------------|-------------|-------------|
| g MGYG-HGUT-00466 | g Malassezia                   | 0.063250885  | 0.087469527 | 0.465488609 |
| g MGYG-HGUT-00466 | g unclassified Fungi           | 0.054976101  | 0.137552056 | 0.530071323 |
| g MGYG-HGUT-00466 | g Mycosphaerella               | -0.019819549 | 0.592652005 | 0.843616292 |
| g MGYG-HGUT-00466 | g Simplicillium                | -0.031087141 | 0.401319019 | 0.735790931 |
| g MGYG-HGUT-00466 | g unclassified Cordycipitaceae | 0.063371913  | 0.086864199 | 0.463850116 |
| g MGYG-HGUT-00466 | g unidentified                 | 0.07240001   | 0.050382942 | 0.386038256 |
| g UBA1375         | g Verticillium                 | 0.03200759   | 0.387516469 | 0.727203277 |
| g UBA1375         | g unclassified Tremellomycetes | 0.09676103   | 0.008849944 | 0.180264028 |
| g UBA1375         | g Candida                      | 0.03507417   | 0.343654447 | 0.695724384 |
| g UBA1375         | g Cladosporium                 | 0.094944762  | 0.010215921 | 0.1959478   |
| g UBA1375         | g Debaryomyces                 | -0.062759994 | 0.089959648 | 0.467790171 |
| g UBA1375         | g Aspergillus                  | 0.015360484  | 0.678423535 | 0.885522992 |
| g UBA1375         | g Kazachstania                 | -0.045497695 | 0.21920199  | 0.60663028  |
| g UBA1375         | g Malassezia                   | 0.03774624   | 0.308125947 | 0.670997057 |
| g UBA1375         | g unclassified Fungi           | 0.023851754  | 0.519660935 | 0.804190116 |
| g UBA1375         | g Mycosphaerella               | -0.039964931 | 0.280536779 | 0.657094722 |
| g UBA1375         | g Simplicillium                | 0.002948817  | 0.936562605 | 0.977387129 |
| g UBA1375         | g unclassified Cordycipitaceae | 0.067027045  | 0.070118128 | 0.439536772 |
| g UBA1375         | g unidentified                 | -0.056942123 | 0.124009907 | 0.508632924 |
| g UBA5884         | g Verticillium                 | 0.043064267  | 0.244879805 | 0.628403245 |
| g UBA5884         | g unclassified Tremellomycetes | -0.07597901  | 0.040004821 | 0.350685903 |
| g UBA5884         | g Candida                      | -0.041768143 | 0.259385223 | 0.638268931 |
| g UBA5884         | g Cladosporium                 | 0.047771589  | 0.197006467 | 0.58576073  |
| g UBA5884         | g Debaryomyces                 | -0.098548822 | 0.007666864 | 0.168671018 |
| g UBA5884         | g Aspergillus                  | 0.084666648  | 0.022060332 | 0.282696471 |
| g UBA5884         | g Kazachstania                 | -0.021524395 | 0.561222451 | 0.826964057 |
| g UBA5884         | g Malassezia                   | -0.002228238 | 0.952042646 | 0.982634054 |
| g UBA5884         | g unclassified Fungi           | 0.057642895  | 0.119442142 | 0.502959311 |
| g UBA5884         | g Mycosphaerella               | 0.033561771  | 0.364876374 | 0.713953478 |
| g UBA5884         | g Simplicillium                | -9.80E-05    | 0.997888735 | 0.998643711 |
| g UBA5884         | g unclassified Cordycipitaceae | 0.071610531  | 0.052952695 | 0.395166025 |
| g UBA5884         | g unidentified                 | 0.062149977  | 0.093133053 | 0.471954484 |
| g Agathobaculum   | g Verticillium                 | -0.015733319 | 0.671069792 | 0.881540395 |
| g Agathobaculum   | g unclassified Tremellomycetes | 0.043942806  | 0.235376683 | 0.619373537 |
| g Agathobaculum   | g Candida                      | 0.025737003  | 0.487195752 | 0.783154405 |
| g Agathobaculum   | g Cladosporium                 | 0.048520979  | 0.190064237 | 0.580115304 |
| g Agathobaculum   | g Debaryomyces                 | -0.059977475 | 0.105168824 | 0.485556938 |
| g Agathobaculum   | g Aspergillus                  | 0.045644045  | 0.217721638 | 0.605341664 |
| g Agathobaculum   | g Kazachstania                 | -0.050346446 | 0.173908935 | 0.569048964 |
| g Agathobaculum   | g Malassezia                   | 0.011737054  | 0.751393304 | 0.910387945 |
| g Agathobaculum   | g unclassified Fungi           | -0.00805016  | 0.827987549 | 0.939989934 |
| g Agathobaculum   | g Mycosphaerella               | -0.039071639 | 0.291436581 | 0.660859538 |
| g Agathobaculum   | g Simplicillium                | 0.065804862  | 0.075395712 | 0.444977361 |
| g Agathobaculum   | g unclassified Cordycipitaceae | 0.000513089  | 0.988950716 | 0.995548313 |
| g Agathobaculum   | g unidentified                 | 0.006856742  | 0.853173558 | 0.949477689 |
| g MGYG-HGUT-00220 | g Verticillium                 | -0.003980597 | 0.914440175 | 0.971254234 |
| g MGYG-HGUT-00220 | g unclassified Tremellomycetes | -0.022074914 | 0.5512481   | 0.819745278 |
| g MGYG-HGUT-00220 | g Candida                      | -0.023088149 | 0.533120662 | 0.811490628 |
| g MGYG-HGUT-00220 | g Cladosporium                 | 0.024597941  | 0.506679336 | 0.796550563 |
| g MGYG-HGUT-00220 | g Debaryomyces                 | -0.118040517 | 0.001387758 | 0.072341182 |
| g MGYG-HGUT-00220 | g Aspergillus                  | 0.033147435  | 0.370829958 | 0.717555606 |
| g MGYG-HGUT-00220 | g Kazachstania                 | -0.012063166 | 0.744722725 | 0.909574751 |
| g MGYG-HGUT-00220 | g Malassezia                   | 0.074383775  | 0.044382624 | 0.366728198 |
| g MGYG-HGUT-00220 | g unclassified Fungi           | 0.036959035  | 0.318331373 | 0.676223819 |
| g MGYG-HGUT-00220 | g Mycosphaerella               | 0.002036844  | 0.9561576   | 0.983900408 |
| g MGYG-HGUT-00220 | g Simplicillium                | 0.033470755  | 0.366179039 | 0.715191324 |
| g MGYG-HGUT-00220 | g unclassified Cordycipitaceae | 0.068302862  | 0.06493566  | 0.423806055 |
| g MGYG-HGUT-00220 | g unidentified                 | 0.065651024  | 0.076082359 | 0.446374478 |
| g UBA4644         | g Verticillium                 | 0.05318961   | 0.150819134 | 0.547949889 |
| g UBA4644         | g unclassified Tremellomycetes | -0.049118044 | 0.184663143 | 0.576342405 |
| g UBA4644         | g Candida                      | -0.028946838 | 0.434531756 | 0.754622456 |
| g UBA4644         | g Cladosporium                 | 0.029420806  | 0.427043307 | 0.749912424 |
| g UBA4644         | g Debaryomyces                 | -0.158584323 | 1.65E-05    | 0.008790035 |
| g UBA4644         | g Aspergillus                  | 0.089211497  | 0.015834988 | 0.247173713 |
| g UBA4644         | g Kazachstania                 | -0.016533726 | 0.655389185 | 0.873577069 |
| g UBA4644         | g Malassezia                   | 0.042807628  | 0.24770588  | 0.629799043 |
| g UBA4644         | g unclassified Fungi           | 0.077686704  | 0.035729171 | 0.336718155 |
| g UBA4644         | g Mycosphaerella               | 0.014420051  | 0.697107399 | 0.895302916 |
| g UBA4644         | g Simplicillium                | -0.027018752 | 0.465763548 | 0.771663103 |
| g UBA4644         | g unclassified Cordycipitaceae | 0.061547192  | 0.096356283 | 0.47685118  |
| g UBA4644         | g unidentified                 | 0.061951486  | 0.094184754 | 0.47324932  |
| g Butyricoccus    | g Verticillium                 | 0.04884511   | 0.187117886 | 0.577661122 |
| g Butyricoccus    | g unclassified Tremellomycetes | 0.021391101  | 0.563650529 | 0.828294666 |
| g Butyricoccus    | g Candida                      | -0.012515158 | 0.735508906 | 0.90737623  |
| g Butyricoccus    | g Cladosporium                 | 0.07604369   | 0.03983532  | 0.350405121 |
| g Butyricoccus    | g Debaryomyces                 | -0.082854045 | 0.025081519 | 0.293923185 |
| g Butyricoccus    | g Aspergillus                  | 0.015086607  | 0.683845018 | 0.888296381 |
| g Butyricoccus    | g Kazachstania                 | 0.017357545  | 0.639406813 | 0.86388896  |

|                   |                                |              |             |             |
|-------------------|--------------------------------|--------------|-------------|-------------|
| g Butyricoccus    | g Malassezia                   | 0.063033397  | 0.088565832 | 0.465955266 |
| g Butyricoccus    | g unclassified Fungi           | 0.052436228  | 0.156697302 | 0.554071089 |
| g Butyricoccus    | g Mycosphaerella               | -0.044900699 | 0.225315394 | 0.612119514 |
| g Butyricoccus    | g Simplicillium                | 0.01741291   | 0.638338586 | 0.86388896  |
| g Butyricoccus    | g unclassified Cordycipitaceae | 0.101122962  | 0.006211526 | 0.149727496 |
| g Butyricoccus    | g unidentified                 | -0.017086305 | 0.644651016 | 0.867679604 |
| g Butyricoccus A  | g Verticillium                 | 0.023479308  | 0.526203964 | 0.808287175 |
| g Butyricoccus A  | g unclassified Tremellomycetes | -0.004795203 | 0.897019921 | 0.965241639 |
| g Butyricoccus A  | g Candida                      | -0.027545945 | 0.457102405 | 0.766960938 |
| g Butyricoccus A  | g Cladosporium                 | -0.011470405 | 0.756861405 | 0.912236754 |
| g Butyricoccus A  | g Debaryomyces                 | -0.088767802 | 0.016366007 | 0.250044164 |
| g Butyricoccus A  | g Aspergillus                  | 0.081055029  | 0.028427055 | 0.309480552 |
| g Butyricoccus A  | g Kazachstania                 | -0.031724428 | 0.391731528 | 0.730055982 |
| g Butyricoccus A  | g Malassezia                   | 0.001693415  | 0.963544136 | 0.98676319  |
| g Butyricoccus A  | g unclassified Fungi           | -0.009310977 | 0.801570094 | 0.930555602 |
| g Butyricoccus A  | g Mycosphaerella               | -0.033297729 | 0.368663463 | 0.716210163 |
| g Butyricoccus A  | g Simplicillium                | 0.067252794  | 0.069177215 | 0.438023791 |
| g Butyricoccus A  | g unclassified Cordycipitaceae | 0.010381616  | 0.7793125   | 0.921314364 |
| g Butyricoccus A  | g unidentified                 | 0.004911784  | 0.894530701 | 0.964729299 |
| g MGYG-HGUT-04122 | g Verticillium                 | -0.034522858 | 0.351297552 | 0.703126667 |
| g MGYG-HGUT-04122 | g unclassified Tremellomycetes | 0.009849006  | 0.79036364  | 0.926417823 |
| g MGYG-HGUT-04122 | g Candida                      | -0.012703293 | 0.731684864 | 0.907315107 |
| g MGYG-HGUT-04122 | g Cladosporium                 | 0.014744187  | 0.690646265 | 0.892547431 |
| g MGYG-HGUT-04122 | g Debaryomyces                 | -0.065010369 | 0.078996836 | 0.45101344  |
| g MGYG-HGUT-04122 | g Aspergillus                  | -0.005275515 | 0.886771121 | 0.962146211 |
| g MGYG-HGUT-04122 | g Kazachstania                 | -0.05475562  | 0.139139109 | 0.533656308 |
| g MGYG-HGUT-04122 | g Malassezia                   | 0.015071309  | 0.68414833  | 0.888410556 |
| g MGYG-HGUT-04122 | g unclassified Fungi           | 0.04353856   | 0.239716541 | 0.623263007 |
| g MGYG-HGUT-04122 | g Mycosphaerella               | -0.026040085 | 0.482080406 | 0.780189053 |
| g MGYG-HGUT-04122 | g Simplicillium                | 0.056104468  | 0.129647079 | 0.517527876 |
| g MGYG-HGUT-04122 | g unclassified Cordycipitaceae | -0.00968196  | 0.793838485 | 0.927503461 |
| g MGYG-HGUT-04122 | g unidentified                 | 0.038242582  | 0.301803569 | 0.668274821 |
| g MGYG-HGUT-02604 | g Verticillium                 | 0.01139127   | 0.758486556 | 0.912879845 |
| g MGYG-HGUT-02604 | g unclassified Tremellomycetes | 0.073668602  | 0.046472502 | 0.374986617 |
| g MGYG-HGUT-02604 | g Candida                      | 0.013791338  | 0.709702139 | 0.902091837 |
| g MGYG-HGUT-02604 | g Cladosporium                 | 0.056934855  | 0.124057983 | 0.508632924 |
| g MGYG-HGUT-02604 | g Debaryomyces                 | 0.015139626  | 0.682794208 | 0.887523438 |
| g MGYG-HGUT-02604 | g Aspergillus                  | -0.041475167 | 0.262744679 | 0.640932271 |
| g MGYG-HGUT-02604 | g Kazachstania                 | -0.050776327 | 0.170257942 | 0.564916697 |
| g MGYG-HGUT-02604 | g Malassezia                   | 0.047070633  | 0.203666052 | 0.593377363 |
| g MGYG-HGUT-02604 | g unclassified Fungi           | -0.017856523 | 0.629806491 | 0.859839026 |
| g MGYG-HGUT-02604 | g Mycosphaerella               | -0.046837917 | 0.205912777 | 0.595346722 |
| g MGYG-HGUT-02604 | g Simplicillium                | 0.020337652  | 0.583015671 | 0.838927364 |
| g MGYG-HGUT-02604 | g unclassified Cordycipitaceae | 0.048209181  | 0.192930513 | 0.581782946 |
| g MGYG-HGUT-02604 | g unidentified                 | -0.037188537 | 0.315333519 | 0.675194937 |
| g CAG-272         | g Verticillium                 | 0.028448865  | 0.442480392 | 0.759624839 |
| g CAG-272         | g unclassified Tremellomycetes | -0.045664033 | 0.217520008 | 0.60514212  |
| g CAG-272         | g Candida                      | -0.047528233 | 0.199300251 | 0.586738708 |
| g CAG-272         | g Cladosporium                 | 0.035685728  | 0.335301091 | 0.690649492 |
| g CAG-272         | g Debaryomyces                 | -0.12643331  | 0.000611892 | 0.046450134 |
| g CAG-272         | g Aspergillus                  | 0.039484198  | 0.286367784 | 0.659056958 |
| g CAG-272         | g Kazachstania                 | -0.036150239 | 0.329044237 | 0.684613865 |
| g CAG-272         | g Malassezia                   | 0.075913579  | 0.040176912 | 0.350685903 |
| g CAG-272         | g unclassified Fungi           | 0.024201231  | 0.513559754 | 0.801136059 |
| g CAG-272         | g Mycosphaerella               | 0.024405508  | 0.510010774 | 0.798892628 |
| g CAG-272         | g Simplicillium                | -0.018909386 | 0.609754444 | 0.851291399 |
| g CAG-272         | g unclassified Cordycipitaceae | 0.027207213  | 0.462656953 | 0.769075712 |
| g CAG-272         | g unidentified                 | 0.06607229   | 0.074214077 | 0.444193078 |
| g CAG-841         | g Verticillium                 | 0.05880262   | 0.112173079 | 0.495063318 |
| g CAG-841         | g unclassified Tremellomycetes | -0.095966078 | 0.009426395 | 0.187148424 |
| g CAG-841         | g Candida                      | -0.015208763 | 0.681424865 | 0.886955574 |
| g CAG-841         | g Cladosporium                 | 0.011388291  | 0.758547768 | 0.912879845 |
| g CAG-841         | g Debaryomyces                 | -0.14227858  | 0.000113453 | 0.018409489 |
| g CAG-841         | g Aspergillus                  | 0.112809108  | 0.002253932 | 0.090345101 |
| g CAG-841         | g Kazachstania                 | -0.05778339  | 0.118542403 | 0.502487018 |
| g CAG-841         | g Malassezia                   | 0.037256852  | 0.314444749 | 0.674666329 |
| g CAG-841         | g unclassified Fungi           | 0.095699686  | 0.009626912 | 0.189353121 |
| g CAG-841         | g Mycosphaerella               | 0.010450364  | 0.777889236 | 0.920950194 |
| g CAG-841         | g Simplicillium                | 0.015841476  | 0.668942341 | 0.880657424 |
| g CAG-841         | g unclassified Cordycipitaceae | 0.059165838  | 0.109969498 | 0.492674524 |
| g CAG-841         | g unidentified                 | 0.07306178   | 0.04831001  | 0.378604998 |
| g MGYG-HGUT-00386 | g Verticillium                 | 0.014519218  | 0.695128303 | 0.894923341 |
| g MGYG-HGUT-00386 | g unclassified Tremellomycetes | -0.052352721 | 0.157359388 | 0.55423489  |
| g MGYG-HGUT-00386 | g Candida                      | -0.013014335 | 0.725377219 | 0.906873118 |
| g MGYG-HGUT-00386 | g Cladosporium                 | 0.027852154  | 0.452113499 | 0.76468047  |
| g MGYG-HGUT-00386 | g Debaryomyces                 | -0.091912383 | 0.012917073 | 0.221178741 |
| g MGYG-HGUT-00386 | g Aspergillus                  | 0.032031364  | 0.387163835 | 0.727203277 |
| g MGYG-HGUT-00386 | g Kazachstania                 | -0.027399687 | 0.459496146 | 0.768514023 |



|                   |                                |              |             |             |
|-------------------|--------------------------------|--------------|-------------|-------------|
| g MGYG-HGUT-00386 | g Malassezia                   | 0.057475205  | 0.120523024 | 0.505098868 |
| g MGYG-HGUT-00386 | g unclassified Fungi           | 0.016649134  | 0.653140514 | 0.872413692 |
| g MGYG-HGUT-00386 | g Mycosphaerella               | 0.008771356  | 0.812850779 | 0.934142805 |
| g MGYG-HGUT-00386 | g Simplicillium                | -0.07045155  | 0.056922454 | 0.405625188 |
| g MGYG-HGUT-00386 | g unclassified Cordycipitaceae | 0.003408854  | 0.926691872 | 0.974172444 |
| g MGYG-HGUT-00386 | g unidentified                 | 0.031553396  | 0.394290857 | 0.730848211 |
| g CAG-724         | g Verticillium                 | 0.061709192  | 0.095481399 | 0.475474903 |
| g CAG-724         | g unclassified Tremellomycetes | -0.059294254 | 0.109198638 | 0.492300296 |
| g CAG-724         | g Candida                      | -0.006243901 | 0.866167001 | 0.954967619 |
| g CAG-724         | g Cladosporium                 | 0.022043742  | 0.551810532 | 0.820005483 |
| g CAG-724         | g Debaryomyces                 | -0.049520501 | 0.181086983 | 0.575010893 |
| g CAG-724         | g Aspergillus                  | 0.054268713  | 0.142693745 | 0.537761478 |
| g CAG-724         | g Kazachstania                 | 0.001240376  | 0.973292863 | 0.990420721 |
| g CAG-724         | g Malassezia                   | 0.083022732  | 0.024786017 | 0.293101188 |
| g CAG-724         | g unclassified Fungi           | 0.012913038  | 0.727429422 | 0.907012052 |
| g CAG-724         | g Mycosphaerella               | -0.002565647 | 0.944791562 | 0.980271037 |
| g CAG-724         | g Simplicillium                | 0.007912386  | 0.830886681 | 0.940950929 |
| g CAG-724         | g unclassified Cordycipitaceae | 0.054721751  | 0.139384145 | 0.533896229 |
| g CAG-724         | g unidentified                 | -0.020872079 | 0.573152821 | 0.833846542 |
| g CAG-448         | g Verticillium                 | -0.006892526 | 0.852416061 | 0.949400054 |
| g CAG-448         | g unclassified Tremellomycetes | -0.063480375 | 0.086324592 | 0.462663716 |
| g CAG-448         | g Candida                      | -0.023407248 | 0.527474719 | 0.808944748 |
| g CAG-448         | g Cladosporium                 | -0.012382632 | 0.738206582 | 0.907794719 |
| g CAG-448         | g Debaryomyces                 | -0.126191991 | 0.000626914 | 0.046998384 |
| g CAG-448         | g Aspergillus                  | 0.115659114  | 0.001734764 | 0.082319598 |
| g CAG-448         | g Kazachstania                 | -0.055873751 | 0.131234101 | 0.518599019 |
| g CAG-448         | g Malassezia                   | 0.012888194  | 0.727933035 | 0.907012052 |
| g CAG-448         | g unclassified Fungi           | -0.013486304 | 0.715841647 | 0.903168431 |
| g CAG-448         | g Mycosphaerella               | 0.000271965  | 0.994143141 | 0.997274144 |
| g CAG-448         | g Simplicillium                | -0.058644764 | 0.113141532 | 0.496377981 |
| g CAG-448         | g unclassified Cordycipitaceae | -0.021249376 | 0.566237698 | 0.829654737 |
| g CAG-448         | g unidentified                 | 0.028963681  | 0.434264349 | 0.754622456 |
| g CAG-390         | g Verticillium                 | 0.013036288  | 0.724932722 | 0.906744053 |
| g CAG-390         | g unclassified Tremellomycetes | -0.053005884 | 0.152236939 | 0.549189615 |
| g CAG-390         | g Candida                      | -0.045124318 | 0.223011396 | 0.61039738  |
| g CAG-390         | g Cladosporium                 | 0.012738267  | 0.730974707 | 0.907315107 |
| g CAG-390         | g Debaryomyces                 | -0.123865505 | 0.000790344 | 0.051309315 |
| g CAG-390         | g Aspergillus                  | 0.091302973  | 0.0135304   | 0.225653879 |
| g CAG-390         | g Kazachstania                 | -0.022792372 | 0.538381073 | 0.814978906 |
| g CAG-390         | g Malassezia                   | 0.008878745  | 0.810602659 | 0.933891925 |
| g CAG-390         | g unclassified Fungi           | 0.016500377  | 0.65603956  | 0.873893583 |
| g CAG-390         | g Mycosphaerella               | -0.007126785 | 0.847460483 | 0.948182609 |
| g CAG-390         | g Simplicillium                | -0.010957111 | 0.767421444 | 0.916616044 |
| g CAG-390         | g unclassified Cordycipitaceae | 0.019802351  | 0.592973123 | 0.843846367 |
| g CAG-390         | g unidentified                 | 0.061481237  | 0.096714296 | 0.477459115 |
| g MGYG-HGUT-02723 | g Verticillium                 | 0.036600893  | 0.32304668  | 0.679618283 |
| g MGYG-HGUT-02723 | g unclassified Tremellomycetes | -0.081607498 | 0.027361046 | 0.305416237 |
| g MGYG-HGUT-02723 | g Candida                      | -0.050799651 | 0.170061506 | 0.564843333 |
| g MGYG-HGUT-02723 | g Cladosporium                 | -0.021342609 | 0.564535108 | 0.828788917 |
| g MGYG-HGUT-02723 | g Debaryomyces                 | -0.090631717 | 0.01423556  | 0.2305609   |
| g MGYG-HGUT-02723 | g Aspergillus                  | 0.067410001  | 0.068528116 | 0.43623748  |
| g MGYG-HGUT-02723 | g Kazachstania                 | -0.067802444 | 0.066929518 | 0.431332617 |
| g MGYG-HGUT-02723 | g Malassezia                   | 0.035925631  | 0.33206016  | 0.68778737  |
| g MGYG-HGUT-02723 | g unclassified Fungi           | 0.06075826   | 0.100708769 | 0.478858752 |
| g MGYG-HGUT-02723 | g Mycosphaerella               | -0.020001364 | 0.589262083 | 0.842189541 |
| g MGYG-HGUT-02723 | g Simplicillium                | -0.018326691 | 0.620817159 | 0.856123107 |
| g MGYG-HGUT-02723 | g unclassified Cordycipitaceae | 0.042150601  | 0.25504454  | 0.635347198 |
| g MGYG-HGUT-02723 | g unidentified                 | 0.046403985  | 0.210149988 | 0.598924637 |
| g QALR01          | g Verticillium                 | 0.007806575  | 0.833114763 | 0.941769117 |
| g QALR01          | g unclassified Tremellomycetes | -0.008047397 | 0.828045672 | 0.939989934 |
| g QALR01          | g Candida                      | -0.05094121  | 0.168872899 | 0.563848296 |
| g QALR01          | g Cladosporium                 | 0.010772996  | 0.771219885 | 0.917834971 |
| g QALR01          | g Debaryomyces                 | -0.097926809 | 0.008061389 | 0.172334585 |
| g QALR01          | g Aspergillus                  | 0.046350277  | 0.210678778 | 0.599462983 |
| g QALR01          | g Kazachstania                 | -0.076714986 | 0.038111738 | 0.343232686 |
| g QALR01          | g Malassezia                   | 0.029081511  | 0.432396329 | 0.753932765 |
| g QALR01          | g unclassified Fungi           | 0.017627585  | 0.634203635 | 0.861728668 |
| g QALR01          | g Mycosphaerella               | 0.021984928  | 0.552872508 | 0.820367644 |
| g QALR01          | g Simplicillium                | -0.064744885 | 0.080230843 | 0.45101344  |
| g QALR01          | g unclassified Cordycipitaceae | 0.060713412  | 0.100960812 | 0.478906569 |
| g QALR01          | g unidentified                 | 0.024861698  | 0.502131707 | 0.793568839 |
| g Firm-07         | g Verticillium                 | 0.043760411  | 0.237327905 | 0.621942518 |
| g Firm-07         | g unclassified Tremellomycetes | -0.065827557 | 0.075294839 | 0.444977361 |
| g Firm-07         | g Candida                      | -0.040640671 | 0.272477379 | 0.649853264 |
| g Firm-07         | g Cladosporium                 | 0.00428844   | 0.907851709 | 0.968833132 |
| g Firm-07         | g Debaryomyces                 | -0.133949292 | 0.000281485 | 0.028641052 |
| g Firm-07         | g Aspergillus                  | 0.089206807  | 0.015840521 | 0.247173713 |
| g Firm-07         | g Kazachstania                 | -0.032022616 | 0.387293569 | 0.727203277 |

|                   |                                |              |             |             |
|-------------------|--------------------------------|--------------|-------------|-------------|
| g Firm-07         | g Malassezia                   | 0.061924887  | 0.09432641  | 0.473498111 |
| g Firm-07         | g unclassified Fungi           | 0.048817857  | 0.187364309 | 0.577661122 |
| g Firm-07         | g Mycosphaerella               | -0.053601436 | 0.147677623 | 0.543295086 |
| g Firm-07         | g Simplicillium                | -0.003419558 | 0.926462317 | 0.974172444 |
| g Firm-07         | g unclassified Cordycipitaceae | 0.044670619  | 0.227703628 | 0.612967811 |
| g Firm-07         | g unidentified                 | 0.030764582  | 0.406224775 | 0.738222664 |
| g MGYG-HGUT-04098 | g Verticillium                 | 0.057272313  | 0.121840998 | 0.506577845 |
| g MGYG-HGUT-04098 | g unclassified Tremellomycetes | -0.063670194 | 0.085386737 | 0.460376939 |
| g MGYG-HGUT-04098 | g Candida                      | -0.042690631 | 0.249001769 | 0.63134694  |
| g MGYG-HGUT-04098 | g Cladosporium                 | 0.026623842  | 0.47231059  | 0.77452203  |
| g MGYG-HGUT-04098 | g Debaryomyces                 | -0.107481728 | 0.003620725 | 0.119732844 |
| g MGYG-HGUT-04098 | g Aspergillus                  | 0.027187957  | 0.46297384  | 0.769075712 |
| g MGYG-HGUT-04098 | g Kazachstania                 | -0.037755174 | 0.308011381 | 0.670986565 |
| g MGYG-HGUT-04098 | g Malassezia                   | 0.05570617   | 0.132396225 | 0.520630567 |
| g MGYG-HGUT-04098 | g unclassified Fungi           | 0.034289699  | 0.354562047 | 0.70583652  |
| g MGYG-HGUT-04098 | g Mycosphaerella               | 0.020197844  | 0.585608804 | 0.840031499 |
| g MGYG-HGUT-04098 | g Simplicillium                | 0.041222447  | 0.265666512 | 0.643608752 |
| g MGYG-HGUT-04098 | g unclassified Cordycipitaceae | 0.067863987  | 0.066681626 | 0.430259125 |
| g MGYG-HGUT-04098 | g unidentified                 | 0.023335496  | 0.528741594 | 0.809599703 |
| g MGYG-HGUT-04035 | g Verticillium                 | -0.001124354 | 0.975790187 | 0.990687906 |
| g MGYG-HGUT-04035 | g unclassified Tremellomycetes | -0.013117108 | 0.723297137 | 0.905975597 |
| g MGYG-HGUT-04035 | g Candida                      | -0.025181324 | 0.496649839 | 0.789121411 |
| g MGYG-HGUT-04035 | g Cladosporium                 | 0.046442557  | 0.209770814 | 0.598807697 |
| g MGYG-HGUT-04035 | g Debaryomyces                 | -0.134301266 | 0.00027116  | 0.028073785 |
| g MGYG-HGUT-04035 | g Aspergillus                  | 0.047622364  | 0.198410708 | 0.58591995  |
| g MGYG-HGUT-04035 | g Kazachstania                 | -0.051553582 | 0.163802688 | 0.561723687 |
| g MGYG-HGUT-04035 | g Malassezia                   | 0.040374355  | 0.275634593 | 0.653142958 |
| g MGYG-HGUT-04035 | g unclassified Fungi           | 0.04841984   | 0.19099053  | 0.580402598 |
| g MGYG-HGUT-04035 | g Mycosphaerella               | -0.044578087 | 0.228669166 | 0.613524642 |
| g MGYG-HGUT-04035 | g Simplicillium                | -0.044720901 | 0.227180171 | 0.612967811 |
| g MGYG-HGUT-04035 | g unclassified Cordycipitaceae | 0.050746349  | 0.170510672 | 0.564916697 |
| g MGYG-HGUT-04035 | g unidentified                 | 0.009958791  | 0.788082184 | 0.925277255 |
| g MGYG-HGUT-01133 | g Verticillium                 | 0.023053427  | 0.533736851 | 0.81172799  |
| g MGYG-HGUT-01133 | g unclassified Tremellomycetes | 0.014409826  | 0.697311577 | 0.895302916 |
| g MGYG-HGUT-01133 | g Candida                      | -0.023652185 | 0.523161698 | 0.806065936 |
| g MGYG-HGUT-01133 | g Cladosporium                 | 0.067393129  | 0.06859754  | 0.43623748  |
| g MGYG-HGUT-01133 | g Debaryomyces                 | -0.105645526 | 0.004243672 | 0.126141964 |
| g MGYG-HGUT-01133 | g Aspergillus                  | 0.033998946  | 0.358659607 | 0.709541216 |
| g MGYG-HGUT-01133 | g Kazachstania                 | -0.012273879 | 0.740422732 | 0.909177992 |
| g MGYG-HGUT-01133 | g Malassezia                   | 0.011921458  | 0.747619029 | 0.910244784 |
| g MGYG-HGUT-01133 | g unclassified Fungi           | 0.053003977  | 0.152251705 | 0.549189615 |
| g MGYG-HGUT-01133 | g Mycosphaerella               | -0.062586256 | 0.090854483 | 0.469444404 |
| g MGYG-HGUT-01133 | g Simplicillium                | -0.001489105 | 0.967940003 | 0.988549475 |
| g MGYG-HGUT-01133 | g unclassified Cordycipitaceae | 0.038110397  | 0.303478858 | 0.669409574 |
| g MGYG-HGUT-01133 | g unidentified                 | -0.02961109  | 0.424058166 | 0.747966394 |
| g MGYG-HGUT-04214 | g Verticillium                 | 0.048208876  | 0.192933334 | 0.581782946 |
| g MGYG-HGUT-04214 | g unclassified Tremellomycetes | -0.054798902 | 0.138826452 | 0.532847848 |
| g MGYG-HGUT-04214 | g Candida                      | -0.034798619 | 0.347461206 | 0.698934711 |
| g MGYG-HGUT-04214 | g Cladosporium                 | 0.002697448  | 0.941960302 | 0.978613814 |
| g MGYG-HGUT-04214 | g Debaryomyces                 | -0.137134003 | 0.000200067 | 0.023264945 |
| g MGYG-HGUT-04214 | g Aspergillus                  | 0.070810809  | 0.055666308 | 0.401541153 |
| g MGYG-HGUT-04214 | g Kazachstania                 | -0.081574601 | 0.027423544 | 0.305524053 |
| g MGYG-HGUT-04214 | g Malassezia                   | 0.027006065  | 0.465973089 | 0.771663103 |
| g MGYG-HGUT-04214 | g unclassified Fungi           | 0.042846994  | 0.247270914 | 0.629733759 |
| g MGYG-HGUT-04214 | g Mycosphaerella               | -0.003728007 | 0.919850507 | 0.972219143 |
| g MGYG-HGUT-04214 | g Simplicillium                | -0.029971986 | 0.418430056 | 0.744941528 |
| g MGYG-HGUT-04214 | g unclassified Cordycipitaceae | 0.046112259  | 0.21303379  | 0.600680647 |
| g MGYG-HGUT-04214 | g unidentified                 | 0.050672436  | 0.171134997 | 0.565255978 |
| g MGYG-HGUT-02123 | g Verticillium                 | 0.052276117  | 0.157968593 | 0.554768804 |
| g MGYG-HGUT-02123 | g unclassified Tremellomycetes | -0.029756037 | 0.421792455 | 0.746638969 |
| g MGYG-HGUT-02123 | g Candida                      | -0.057360058 | 0.121269638 | 0.505823928 |
| g MGYG-HGUT-02123 | g Cladosporium                 | -0.009303955 | 0.801716622 | 0.930555602 |
| g MGYG-HGUT-02123 | g Debaryomyces                 | -0.10106563  | 0.006241028 | 0.150048656 |
| g MGYG-HGUT-02123 | g Aspergillus                  | 0.093377325  | 0.011542075 | 0.20914081  |
| g MGYG-HGUT-02123 | g Kazachstania                 | -0.026509617 | 0.474213665 | 0.775719431 |
| g MGYG-HGUT-02123 | g Malassezia                   | 0.027207343  | 0.462654814 | 0.769075712 |
| g MGYG-HGUT-02123 | g unclassified Fungi           | 0.085464568  | 0.020833871 | 0.277662496 |
| g MGYG-HGUT-02123 | g Mycosphaerella               | -0.015254428 | 0.680520987 | 0.886595465 |
| g MGYG-HGUT-02123 | g Simplicillium                | 0.063230659  | 0.087571018 | 0.465488609 |
| g MGYG-HGUT-02123 | g unclassified Cordycipitaceae | 0.039004594  | 0.292265955 | 0.660929744 |
| g MGYG-HGUT-02123 | g unidentified                 | 0.044731362  | 0.227071375 | 0.612967811 |
| g MGYG-HGUT-03979 | g Verticillium                 | 0.056287992  | 0.128395338 | 0.51543227  |
| g MGYG-HGUT-03979 | g unclassified Tremellomycetes | -0.062092822 | 0.093434916 | 0.472397649 |
| g MGYG-HGUT-03979 | g Candida                      | -0.051025064 | 0.168171754 | 0.563459023 |
| g MGYG-HGUT-03979 | g Cladosporium                 | 0.004133065  | 0.911176272 | 0.969831755 |
| g MGYG-HGUT-03979 | g Debaryomyces                 | -0.141132184 | 0.000128958 | 0.018928692 |
| g MGYG-HGUT-03979 | g Aspergillus                  | 0.075091891  | 0.042391912 | 0.358790655 |
| g MGYG-HGUT-03979 | g Kazachstania                 | -0.050588596 | 0.171845236 | 0.565795361 |

|                   |                                |              |             |             |
|-------------------|--------------------------------|--------------|-------------|-------------|
| g MGYG-HGUT-03979 | g Malassezia                   | 0.039834583  | 0.282109817 | 0.657094722 |
| g MGYG-HGUT-03979 | g unclassified Fungi           | 0.08391589   | 0.023271045 | 0.285641852 |
| g MGYG-HGUT-03979 | g Mycosphaerella               | 0.036806587  | 0.32033298  | 0.67754619  |
| g MGYG-HGUT-03979 | g Simplicillium                | 0.002802043  | 0.939713972 | 0.978000513 |
| g MGYG-HGUT-03979 | g unclassified Cordycipitaceae | 0.042537925  | 0.250700277 | 0.632007503 |
| g MGYG-HGUT-03979 | g unidentified                 | 0.080020595  | 0.030519252 | 0.315608804 |
| g MGYG-HGUT-03973 | g Verticillium                 | 0.018575274  | 0.616087044 | 0.854111503 |
| g MGYG-HGUT-03973 | g unclassified Tremellomycetes | -0.040400572 | 0.275322685 | 0.653130896 |
| g MGYG-HGUT-03973 | g Candida                      | -0.033958882 | 0.359226546 | 0.710264446 |
| g MGYG-HGUT-03973 | g Cladosporium                 | -0.023489987 | 0.526015774 | 0.808232746 |
| g MGYG-HGUT-03973 | g Debaryomyces                 | -0.128588377 | 0.000491817 | 0.041635221 |
| g MGYG-HGUT-03973 | g Aspergillus                  | 0.084428982  | 0.022437551 | 0.283321191 |
| g MGYG-HGUT-03973 | g Kazachstania                 | 0.011210888  | 0.762194946 | 0.914705578 |
| g MGYG-HGUT-03973 | g Malassezia                   | 0.023175547  | 0.531571265 | 0.811490628 |
| g MGYG-HGUT-03973 | g unclassified Fungi           | 0.037781039  | 0.307679843 | 0.670833121 |
| g MGYG-HGUT-03973 | g Mycosphaerella               | -0.012168726 | 0.742567586 | 0.909574751 |
| g MGYG-HGUT-03973 | g Simplicillium                | -0.040583223 | 0.273156339 | 0.650583024 |
| g MGYG-HGUT-03973 | g unclassified Cordycipitaceae | 0.028678343  | 0.438807194 | 0.757620775 |
| g MGYG-HGUT-03973 | g unidentified                 | 0.042357816  | 0.252713943 | 0.638844354 |
| g MGYG-HGUT-01879 | g Verticillium                 | 0.059530749  | 0.107790163 | 0.489543137 |
| g MGYG-HGUT-01879 | g unclassified Tremellomycetes | -0.066028198 | 0.07440785  | 0.444347558 |
| g MGYG-HGUT-01879 | g Candida                      | -0.062831382 | 0.089594022 | 0.467278702 |
| g MGYG-HGUT-01879 | g Cladosporium                 | 0.023570021  | 0.524606473 | 0.80711702  |
| g MGYG-HGUT-01879 | g Debaryomyces                 | -0.186257327 | 3.94E-07    | 0.003163107 |
| g MGYG-HGUT-01879 | g Aspergillus                  | 0.057152188  | 0.122626608 | 0.507270257 |
| g MGYG-HGUT-01879 | g Kazachstania                 | -0.034740379 | 0.348269209 | 0.700111089 |
| g MGYG-HGUT-01879 | g Malassezia                   | 0.040756786  | 0.271108575 | 0.649065824 |
| g MGYG-HGUT-01879 | g unclassified Fungi           | 0.0508341    | 0.16977168  | 0.564474357 |
| g MGYG-HGUT-01879 | g Mycosphaerella               | -0.017964222 | 0.627742442 | 0.859238199 |
| g MGYG-HGUT-01879 | g Simplicillium                | -0.03365099  | 0.363602227 | 0.713515619 |
| g MGYG-HGUT-01879 | g unclassified Cordycipitaceae | 0.039900264  | 0.281316436 | 0.657094722 |
| g MGYG-HGUT-01879 | g unidentified                 | 0.064248864  | 0.082578278 | 0.455217912 |
| g MGYG-HGUT-04246 | g Verticillium                 | 0.038302959  | 0.301040414 | 0.667386268 |
| g MGYG-HGUT-04246 | g unclassified Tremellomycetes | -0.012374805 | 0.738366013 | 0.907794719 |
| g MGYG-HGUT-04246 | g Candida                      | -0.008085254 | 0.827249471 | 0.939989934 |
| g MGYG-HGUT-04246 | g Cladosporium                 | 0.047500419  | 0.199563659 | 0.586932361 |
| g MGYG-HGUT-04246 | g Debaryomyces                 | -0.113030474 | 0.002209016 | 0.089220652 |
| g MGYG-HGUT-04246 | g Aspergillus                  | 0.025674279  | 0.488258027 | 0.783671537 |
| g MGYG-HGUT-04246 | g Kazachstania                 | 0.018404062  | 0.619343233 | 0.856084166 |
| g MGYG-HGUT-04246 | g Malassezia                   | 0.041989495  | 0.256866816 | 0.636870816 |
| g MGYG-HGUT-04246 | g unclassified Fungi           | 0.081356035  | 0.027841907 | 0.307539732 |
| g MGYG-HGUT-04246 | g Mycosphaerella               | -0.020380709 | 0.582218144 | 0.838552014 |
| g MGYG-HGUT-04246 | g Simplicillium                | -0.032103206 | 0.386099408 | 0.7260892   |
| g MGYG-HGUT-04246 | g unclassified Cordycipitaceae | 0.093872029  | 0.011107934 | 0.204069724 |
| g MGYG-HGUT-04246 | g unidentified                 | 0.011794238  | 0.750222255 | 0.910387945 |
| g MGYG-HGUT-00350 | g Verticillium                 | 0.039671795  | 0.284082695 | 0.658002559 |
| g MGYG-HGUT-00350 | g unclassified Tremellomycetes | -0.138342032 | 0.000175423 | 0.022365358 |
| g MGYG-HGUT-00350 | g Candida                      | -0.010678958 | 0.773162096 | 0.918249304 |
| g MGYG-HGUT-00350 | g Cladosporium                 | -0.003874784 | 0.916706155 | 0.971437239 |
| g MGYG-HGUT-00350 | g Debaryomyces                 | -0.130418807 | 0.000407451 | 0.035930399 |
| g MGYG-HGUT-00350 | g Aspergillus                  | 0.048401738  | 0.191156672 | 0.580480671 |
| g MGYG-HGUT-00350 | g Kazachstania                 | -0.040565883 | 0.273361497 | 0.650634569 |
| g MGYG-HGUT-00350 | g Malassezia                   | 0.00713584   | 0.847269046 | 0.948182609 |
| g MGYG-HGUT-00350 | g unclassified Fungi           | 0.051304748  | 0.165848955 | 0.562504371 |
| g MGYG-HGUT-00350 | g Mycosphaerella               | -0.014427593 | 0.696956814 | 0.895302916 |
| g MGYG-HGUT-00350 | g Simplicillium                | -0.055835031 | 0.131501912 | 0.518655697 |
| g MGYG-HGUT-00350 | g unclassified Cordycipitaceae | 0.035215166  | 0.341716893 | 0.694699556 |
| g MGYG-HGUT-00350 | g unidentified                 | 0.053743849  | 0.146602954 | 0.541106541 |
| g MGYG-HGUT-00900 | g Verticillium                 | 0.035144439  | 0.342687936 | 0.695270538 |
| g MGYG-HGUT-00900 | g unclassified Tremellomycetes | 0.042341747  | 0.252894146 | 0.633852642 |
| g MGYG-HGUT-00900 | g Candida                      | -0.017793188 | 0.631021643 | 0.860229872 |
| g MGYG-HGUT-00900 | g Cladosporium                 | 0.06841691   | 0.064488157 | 0.423004068 |
| g MGYG-HGUT-00900 | g Debaryomyces                 | -0.078407151 | 0.034045617 | 0.329231974 |
| g MGYG-HGUT-00900 | g Aspergillus                  | 0.037522139  | 0.311008975 | 0.672399691 |
| g MGYG-HGUT-00900 | g Kazachstania                 | 0.049693543  | 0.179565235 | 0.574257008 |
| g MGYG-HGUT-00900 | g Malassezia                   | 0.018993199  | 0.608170426 | 0.851291399 |
| g MGYG-HGUT-00900 | g unclassified Fungi           | 0.070829517  | 0.055601531 | 0.401541153 |
| g MGYG-HGUT-00900 | g Mycosphaerella               | 0.028248106  | 0.445708224 | 0.761797014 |
| g MGYG-HGUT-00900 | g Simplicillium                | 0.003169695  | 0.931822045 | 0.976058688 |
| g MGYG-HGUT-00900 | g unclassified Cordycipitaceae | 0.052340917  | 0.157453141 | 0.55423489  |
| g MGYG-HGUT-00900 | g unidentified                 | 0.035737536  | 0.334599486 | 0.690008638 |
| g MGYG-HGUT-03959 | g Verticillium                 | 0.011897377  | 0.748111581 | 0.910244784 |
| g MGYG-HGUT-03959 | g unclassified Tremellomycetes | -0.068633669 | 0.063644643 | 0.421193    |
| g MGYG-HGUT-03959 | g Candida                      | -0.026270297 | 0.478214509 | 0.780093407 |
| g MGYG-HGUT-03959 | g Cladosporium                 | 0.006791538  | 0.854554193 | 0.950282941 |
| g MGYG-HGUT-03959 | g Debaryomyces                 | -0.113102255 | 0.002194629 | 0.088979156 |
| g MGYG-HGUT-03959 | g Aspergillus                  | 0.083320614  | 0.024271538 | 0.290150819 |
| g MGYG-HGUT-03959 | g Kazachstania                 | -0.064746775 | 0.080222003 | 0.45101344  |

|   |                 |   |                              |              |             |             |
|---|-----------------|---|------------------------------|--------------|-------------|-------------|
| g | MGYG-HGUT-03959 | g | Malassezia                   | 0.019242506  | 0.603469552 | 0.848626551 |
| g | MGYG-HGUT-03959 | g | unclassified Fungi           | 0.054367313  | 0.141968365 | 0.537119624 |
| g | MGYG-HGUT-03959 | g | Mycosphaerella               | -0.039437798 | 0.286934884 | 0.659118154 |
| g | MGYG-HGUT-03959 | g | Simplicillium                | 0.012752027  | 0.730695382 | 0.907315107 |
| g | MGYG-HGUT-03959 | g | unclassified Cordycipitaceae | 0.045532014  | 0.218854198 | 0.606623524 |
| g | MGYG-HGUT-03959 | g | unidentified                 | 0.009286602  | 0.802078779 | 0.930555602 |
| g | MGYG-HGUT-02047 | g | Verticillium                 | 0.014855124  | 0.688440042 | 0.891353992 |
| g | MGYG-HGUT-02047 | g | unclassified Tremellomycetes | -0.032145007 | 0.385480902 | 0.725699858 |
| g | MGYG-HGUT-02047 | g | Candida                      | 0.007863982  | 0.831905774 | 0.941219598 |
| g | MGYG-HGUT-02047 | g | Cladosporium                 | -0.022679318 | 0.540398585 | 0.815420595 |
| g | MGYG-HGUT-02047 | g | Debaryomyces                 | -0.10625293  | 0.004027618 | 0.124539164 |
| g | MGYG-HGUT-02047 | g | Aspergillus                  | 0.116524622  | 0.001600352 | 0.078767115 |
| g | MGYG-HGUT-02047 | g | Kazachstania                 | -0.003162324 | 0.931980219 | 0.976058688 |
| g | MGYG-HGUT-02047 | g | Malassezia                   | 0.011423489  | 0.757824764 | 0.912444277 |
| g | MGYG-HGUT-02047 | g | unclassified Fungi           | 0.063778116  | 0.08485719  | 0.459313957 |
| g | MGYG-HGUT-02047 | g | Mycosphaerella               | 0.010743102  | 0.771837148 | 0.917900008 |
| g | MGYG-HGUT-02047 | g | Simplicillium                | -0.030235534 | 0.414347935 | 0.742882112 |
| g | MGYG-HGUT-02047 | g | unclassified Cordycipitaceae | 0.009746192  | 0.79250186  | 0.926965257 |
| g | MGYG-HGUT-02047 | g | unidentified                 | 0.04053555   | 0.273720633 | 0.651089839 |
| g | MGYG-HGUT-00516 | g | Verticillium                 | 0.037807781  | 0.307337328 | 0.670833121 |
| g | MGYG-HGUT-00516 | g | unclassified Tremellomycetes | -0.056029744 | 0.130159447 | 0.517799726 |
| g | MGYG-HGUT-00516 | g | Candida                      | -0.025624388 | 0.489103857 | 0.784196518 |
| g | MGYG-HGUT-00516 | g | Cladosporium                 | 0.02059883   | 0.578185755 | 0.836641823 |
| g | MGYG-HGUT-00516 | g | Debaryomyces                 | -0.127466613 | 0.000551275 | 0.045221636 |
| g | MGYG-HGUT-00516 | g | Aspergillus                  | 0.069456846  | 0.060523713 | 0.412830947 |
| g | MGYG-HGUT-00516 | g | Kazachstania                 | -0.072322673 | 0.050629975 | 0.386038256 |
| g | MGYG-HGUT-00516 | g | Malassezia                   | 0.034523424  | 0.351289652 | 0.703126667 |
| g | MGYG-HGUT-00516 | g | unclassified Fungi           | 0.053771095  | 0.146398031 | 0.541068386 |
| g | MGYG-HGUT-00516 | g | Mycosphaerella               | -0.025650973 | 0.488653049 | 0.783941094 |
| g | MGYG-HGUT-00516 | g | Simplicillium                | -0.019571575 | 0.597289785 | 0.845894072 |
| g | MGYG-HGUT-00516 | g | unclassified Cordycipitaceae | 0.039217401  | 0.289638878 | 0.660061436 |
| g | MGYG-HGUT-00516 | g | unidentified                 | 0.058146581  | 0.116241072 | 0.499619423 |
| g | MGYG-HGUT-03840 | g | Verticillium                 | 0.055558374  | 0.133427737 | 0.52185568  |
| g | MGYG-HGUT-03840 | g | unclassified Tremellomycetes | -0.062012377 | 0.093861117 | 0.47288973  |
| g | MGYG-HGUT-03840 | g | Candida                      | -0.013509327 | 0.715377601 | 0.902925307 |
| g | MGYG-HGUT-03840 | g | Cladosporium                 | -0.046201056 | 0.212152995 | 0.600680647 |
| g | MGYG-HGUT-03840 | g | Debaryomyces                 | 0.016388079  | 0.658231521 | 0.874831193 |
| g | MGYG-HGUT-03840 | g | Aspergillus                  | 0.010219035  | 0.782681292 | 0.922514306 |
| g | MGYG-HGUT-03840 | g | Kazachstania                 | 0.033248952  | 0.369365724 | 0.71692327  |
| g | MGYG-HGUT-03840 | g | Malassezia                   | 0.023386363  | 0.527843319 | 0.808944748 |
| g | MGYG-HGUT-03840 | g | unclassified Fungi           | 0.012537381  | 0.735056859 | 0.907315107 |
| g | MGYG-HGUT-03840 | g | Mycosphaerella               | 0.036153235  | 0.329004128 | 0.684613865 |
| g | MGYG-HGUT-03840 | g | Simplicillium                | -0.002981014 | 0.935871433 | 0.977340522 |
| g | MGYG-HGUT-03840 | g | unclassified Cordycipitaceae | 0.062826962  | 0.089616624 | 0.467278702 |
| g | MGYG-HGUT-03840 | g | unidentified                 | -0.027683728 | 0.454853761 | 0.765814499 |
| g | MGYG-HGUT-03996 | g | Verticillium                 | 0.022882177  | 0.536781146 | 0.813351716 |
| g | MGYG-HGUT-03996 | g | unclassified Tremellomycetes | 0.018948562  | 0.609013823 | 0.851291399 |
| g | MGYG-HGUT-03996 | g | Candida                      | -0.06673285  | 0.071360027 | 0.442093864 |
| g | MGYG-HGUT-03996 | g | Cladosporium                 | 0.009199989  | 0.80388698  | 0.931428011 |
| g | MGYG-HGUT-03996 | g | Debaryomyces                 | -0.107196295 | 0.003711764 | 0.121228053 |
| g | MGYG-HGUT-03996 | g | Aspergillus                  | 0.061908596  | 0.09441325  | 0.473498111 |
| g | MGYG-HGUT-03996 | g | Kazachstania                 | 0.005314723  | 0.885935322 | 0.96210924  |
| g | MGYG-HGUT-03996 | g | Malassezia                   | 0.027321322  | 0.460781597 | 0.769075712 |
| g | MGYG-HGUT-03996 | g | unclassified Fungi           | -0.005486846 | 0.882267675 | 0.96060876  |
| g | MGYG-HGUT-03996 | g | Mycosphaerella               | 0.027480764  | 0.458168323 | 0.767141961 |
| g | MGYG-HGUT-03996 | g | Simplicillium                | -0.005215526 | 0.888050164 | 0.962251366 |
| g | MGYG-HGUT-03996 | g | unclassified Cordycipitaceae | 0.027562719  | 0.456828319 | 0.766960938 |
| g | MGYG-HGUT-03996 | g | unidentified                 | 0.030861738  | 0.404743399 | 0.737438672 |
| g | MGYG-HGUT-00468 | g | Verticillium                 | 0.016033458  | 0.665172597 | 0.879307486 |
| g | MGYG-HGUT-00468 | g | unclassified Tremellomycetes | -0.057555472 | 0.120004696 | 0.503724591 |
| g | MGYG-HGUT-00468 | g | Candida                      | -0.019497659 | 0.598675397 | 0.846523771 |
| g | MGYG-HGUT-00468 | g | Cladosporium                 | -0.008071158 | 0.827545915 | 0.939989934 |
| g | MGYG-HGUT-00468 | g | Debaryomyces                 | -0.108789718 | 0.003228917 | 0.111297705 |
| g | MGYG-HGUT-00468 | g | Aspergillus                  | 0.074686128  | 0.043523196 | 0.363506278 |
| g | MGYG-HGUT-00468 | g | Kazachstania                 | -0.057138109 | 0.122718943 | 0.507270257 |
| g | MGYG-HGUT-00468 | g | Malassezia                   | 0.016515078  | 0.655752838 | 0.87366908  |
| g | MGYG-HGUT-00468 | g | unclassified Fungi           | 0.06696029   | 0.070398364 | 0.439536772 |
| g | MGYG-HGUT-00468 | g | Mycosphaerella               | -0.022996193 | 0.534753333 | 0.812223305 |
| g | MGYG-HGUT-00468 | g | Simplicillium                | -0.003837382 | 0.917507277 | 0.971437239 |
| g | MGYG-HGUT-00468 | g | unclassified Cordycipitaceae | 0.004794383  | 0.897037439 | 0.965241639 |
| g | MGYG-HGUT-00468 | g | unidentified                 | 0.065169867  | 0.078262906 | 0.450277002 |
| g | MGYG-HGUT-03963 | g | Verticillium                 | 0.058102697  | 0.116517261 | 0.500117618 |
| g | MGYG-HGUT-03963 | g | unclassified Tremellomycetes | -0.067906123 | 0.066512342 | 0.429871706 |
| g | MGYG-HGUT-03963 | g | Candida                      | -0.055744026 | 0.132133012 | 0.520016102 |
| g | MGYG-HGUT-03963 | g | Cladosporium                 | -0.028029928 | 0.449231269 | 0.762723397 |
| g | MGYG-HGUT-03963 | g | Debaryomyces                 | -0.14242772  | 0.00011157  | 0.018409489 |
| g | MGYG-HGUT-03963 | g | Aspergillus                  | 0.051652279  | 0.162996338 | 0.560736054 |
| g | MGYG-HGUT-03963 | g | Kazachstania                 | -0.094413293 | 0.010649574 | 0.19927243  |



|                   |                                |              |             |             |
|-------------------|--------------------------------|--------------|-------------|-------------|
| g MGYG-HGUT-03963 | g Malassezia                   | 0.02444225   | 0.509373814 | 0.798783891 |
| g MGYG-HGUT-03963 | g unclassified Fungi           | 0.064763041  | 0.080145957 | 0.45101344  |
| g MGYG-HGUT-03963 | g Mycosphaerella               | 0.006076445  | 0.869723852 | 0.955405149 |
| g MGYG-HGUT-03963 | g Simplicillium                | -0.014802351 | 0.689489219 | 0.891576094 |
| g MGYG-HGUT-03963 | g unclassified Cordycipitaceae | 0.038541021  | 0.298043855 | 0.666157944 |
| g MGYG-HGUT-03963 | g unidentified                 | 0.060982786  | 0.099454449 | 0.478320958 |
| g UBA1740         | g Verticillium                 | 0.053709785  | 0.146859457 | 0.54128199  |
| g UBA1740         | g unclassified Tremellomycetes | -0.064747917 | 0.080216664 | 0.45101344  |
| g UBA1740         | g Candida                      | -0.040828306 | 0.270267831 | 0.648110713 |
| g UBA1740         | g Cladosporium                 | -0.015340638 | 0.678815836 | 0.885603387 |
| g UBA1740         | g Debaryomyces                 | -0.082123963 | 0.026395816 | 0.300667949 |
| g UBA1740         | g Aspergillus                  | 0.081186615  | 0.028169967 | 0.307552108 |
| g UBA1740         | g Kazachstania                 | -0.028080809 | 0.448408253 | 0.762502994 |
| g UBA1740         | g Malassezia                   | 0.05319205   | 0.150800378 | 0.547949889 |
| g UBA1740         | g unclassified Fungi           | 0.07639848   | 0.038916331 | 0.345770459 |
| g UBA1740         | g Mycosphaerella               | -0.050624345 | 0.171542124 | 0.565255978 |
| g UBA1740         | g Simplicillium                | -0.017949999 | 0.628014855 | 0.85938875  |
| g UBA1740         | g unclassified Cordycipitaceae | 0.030856195  | 0.404827823 | 0.737438672 |
| g UBA1740         | g unidentified                 | 0.035410228  | 0.339047893 | 0.69342961  |
| g MGYG-HGUT-02672 | g Verticillium                 | 0.018613363  | 0.615363664 | 0.853444075 |
| g MGYG-HGUT-02672 | g unclassified Tremellomycetes | -0.038847898 | 0.294210535 | 0.663117334 |
| g MGYG-HGUT-02672 | g Candida                      | -0.03077778  | 0.406023356 | 0.738222664 |
| g MGYG-HGUT-02672 | g Cladosporium                 | 0.039662586  | 0.284194578 | 0.658002559 |
| g MGYG-HGUT-02672 | g Debaryomyces                 | -0.15841841  | 1.68E-05    | 0.008790035 |
| g MGYG-HGUT-02672 | g Aspergillus                  | 0.073274155  | 0.047660112 | 0.377499476 |
| g MGYG-HGUT-02672 | g Kazachstania                 | -0.013536303 | 0.714834032 | 0.902925307 |
| g MGYG-HGUT-02672 | g Malassezia                   | 0.06053237   | 0.101983367 | 0.480707842 |
| g MGYG-HGUT-02672 | g unclassified Fungi           | 0.069018489  | 0.062169533 | 0.417170577 |
| g MGYG-HGUT-02672 | g Mycosphaerella               | 0.002456926  | 0.947127544 | 0.980867457 |
| g MGYG-HGUT-02672 | g Simplicillium                | -0.011982904 | 0.746362736 | 0.909815242 |
| g MGYG-HGUT-02672 | g unclassified Cordycipitaceae | 0.03053248   | 0.409776805 | 0.740965344 |
| g MGYG-HGUT-02672 | g unidentified                 | 0.04036781   | 0.275712492 | 0.653142958 |
| g MGYG-HGUT-04024 | g Verticillium                 | 0.010488411  | 0.777101888 | 0.920449091 |
| g MGYG-HGUT-04024 | g unclassified Tremellomycetes | -0.060387277 | 0.102808799 | 0.482387553 |
| g MGYG-HGUT-04024 | g Candida                      | -0.048795226 | 0.187569124 | 0.577701512 |
| g MGYG-HGUT-04024 | g Cladosporium                 | 0.039230634  | 0.289476043 | 0.660061436 |
| g MGYG-HGUT-04024 | g Debaryomyces                 | -0.084662758 | 0.02206646  | 0.282696471 |
| g MGYG-HGUT-04024 | g Aspergillus                  | 0.027228405  | 0.462308341 | 0.769075712 |
| g MGYG-HGUT-04024 | g Kazachstania                 | -0.045311157 | 0.22109929  | 0.607391664 |
| g MGYG-HGUT-04024 | g Malassezia                   | 0.019707484  | 0.594745887 | 0.844389068 |
| g MGYG-HGUT-04024 | g unclassified Fungi           | 0.059879689  | 0.105738262 | 0.486749242 |
| g MGYG-HGUT-04024 | g Mycosphaerella               | -0.023839079 | 0.51988291  | 0.804200383 |
| g MGYG-HGUT-04024 | g Simplicillium                | -0.034414797 | 0.352808167 | 0.704818603 |
| g MGYG-HGUT-04024 | g unclassified Cordycipitaceae | 0.051232603  | 0.166445809 | 0.562541523 |
| g MGYG-HGUT-04024 | g unidentified                 | -0.00084777  | 0.981744431 | 0.993008299 |
| g MGYG-HGUT-04030 | g Verticillium                 | 0.065501718  | 0.07675364  | 0.44774367  |
| g MGYG-HGUT-04030 | g unclassified Tremellomycetes | -0.070853988 | 0.055516897 | 0.401541153 |
| g MGYG-HGUT-04030 | g Candida                      | -0.052419191 | 0.156832211 | 0.554071089 |
| g MGYG-HGUT-04030 | g Cladosporium                 | 0.016626593  | 0.653579459 | 0.872421924 |
| g MGYG-HGUT-04030 | g Debaryomyces                 | -0.112030248 | 0.002418682 | 0.093070889 |
| g MGYG-HGUT-04030 | g Aspergillus                  | 0.037076882  | 0.31678968  | 0.675860563 |
| g MGYG-HGUT-04030 | g Kazachstania                 | -0.073398091 | 0.047284249 | 0.376778556 |
| g MGYG-HGUT-04030 | g Malassezia                   | 0.035282418  | 0.340795186 | 0.694699556 |
| g MGYG-HGUT-04030 | g unclassified Fungi           | 0.031984195  | 0.387863661 | 0.727338873 |
| g MGYG-HGUT-04030 | g Mycosphaerella               | -0.027669198 | 0.455090596 | 0.765971612 |
| g MGYG-HGUT-04030 | g Simplicillium                | -0.026685044 | 0.471292641 | 0.77381206  |
| g MGYG-HGUT-04030 | g unclassified Cordycipitaceae | 0.073501832  | 0.046971548 | 0.375701373 |
| g MGYG-HGUT-04030 | g unidentified                 | 0.038694387  | 0.296123955 | 0.664712449 |
| g MGYG-HGUT-01934 | g Verticillium                 | 0.012245183  | 0.741007866 | 0.90933095  |
| g MGYG-HGUT-01934 | g unclassified Tremellomycetes | 0.019442945  | 0.599701986 | 0.84692999  |
| g MGYG-HGUT-01934 | g Candida                      | -0.022977683 | 0.535082268 | 0.812489678 |
| g MGYG-HGUT-01934 | g Cladosporium                 | 0.066105778  | 0.074067182 | 0.444193078 |
| g MGYG-HGUT-01934 | g Debaryomyces                 | -0.132535013 | 0.000326792 | 0.031725778 |
| g MGYG-HGUT-01934 | g Aspergillus                  | 0.040523745  | 0.273860496 | 0.651089839 |
| g MGYG-HGUT-01934 | g Kazachstania                 | 0.004038002  | 0.913211134 | 0.970799924 |
| g MGYG-HGUT-01934 | g Malassezia                   | 0.004539351  | 0.902486354 | 0.966636316 |
| g MGYG-HGUT-01934 | g unclassified Fungi           | 0.030797256  | 0.405726223 | 0.738077169 |
| g MGYG-HGUT-01934 | g Mycosphaerella               | -0.064916822 | 0.079429886 | 0.45101344  |
| g MGYG-HGUT-01934 | g Simplicillium                | 0.039920116  | 0.281076933 | 0.657094722 |
| g MGYG-HGUT-01934 | g unclassified Cordycipitaceae | 0.070439919  | 0.056963511 | 0.4056446   |
| g MGYG-HGUT-01934 | g unidentified                 | -0.014051708 | 0.704476423 | 0.89859806  |
| g MGYG-HGUT-02872 | g Verticillium                 | 0.033361802  | 0.367742242 | 0.716103178 |
| g MGYG-HGUT-02872 | g unclassified Tremellomycetes | -0.049078903 | 0.185013699 | 0.576342405 |
| g MGYG-HGUT-02872 | g Candida                      | -0.006095471 | 0.869319583 | 0.955357756 |
| g MGYG-HGUT-02872 | g Cladosporium                 | 0.007712485  | 0.835097182 | 0.942615976 |
| g MGYG-HGUT-02872 | g Debaryomyces                 | -0.129476245 | 0.000449047 | 0.038632674 |
| g MGYG-HGUT-02872 | g Aspergillus                  | 0.092438012  | 0.012407916 | 0.21883174  |
| g MGYG-HGUT-02872 | g Kazachstania                 | -0.064234919 | 0.082645064 | 0.455217912 |

|                   |                                |              |             |             |
|-------------------|--------------------------------|--------------|-------------|-------------|
| g MGYG-HGUT-02872 | g Malassezia                   | 0.052611164  | 0.155317173 | 0.552672864 |
| g MGYG-HGUT-02872 | g unclassified Fungi           | 0.036659947  | 0.322266052 | 0.679081423 |
| g MGYG-HGUT-02872 | g Mycosphaerella               | -0.006453142 | 0.861726442 | 0.953015155 |
| g MGYG-HGUT-02872 | g Simplicillium                | 0.023781693  | 0.52088855  | 0.804795608 |
| g MGYG-HGUT-02872 | g unclassified Cordycipitaceae | 0.050012221  | 0.176787617 | 0.572449989 |
| g MGYG-HGUT-02872 | g unidentified                 | 0.043639466  | 0.238628005 | 0.622994378 |
| g MGYG-HGUT-04190 | g Verticillium                 | 0.052728856  | 0.154393847 | 0.552146547 |
| g MGYG-HGUT-04190 | g unclassified Tremellomycetes | -0.052693596 | 0.154670035 | 0.552146547 |
| g MGYG-HGUT-04190 | g Candida                      | -0.023237309 | 0.530477736 | 0.811128912 |
| g MGYG-HGUT-04190 | g Cladosporium                 | 0.052692429  | 0.154679184 | 0.552146547 |
| g MGYG-HGUT-04190 | g Debaryomyces                 | -0.079122221 | 0.032442019 | 0.325188715 |
| g MGYG-HGUT-04190 | g Aspergillus                  | 0.067481277  | 0.068235469 | 0.435505265 |
| g MGYG-HGUT-04190 | g Kazachstania                 | -0.054502964 | 0.14097502  | 0.535462188 |
| g MGYG-HGUT-04190 | g Malassezia                   | 0.041623974  | 0.261034631 | 0.638970268 |
| g MGYG-HGUT-04190 | g unclassified Fungi           | 0.001438434  | 0.969030374 | 0.988740749 |
| g MGYG-HGUT-04190 | g Mycosphaerella               | 0.01015395   | 0.784031052 | 0.923685117 |
| g MGYG-HGUT-04190 | g Simplicillium                | -0.046611539 | 0.208115491 | 0.597903264 |
| g MGYG-HGUT-04190 | g unclassified Cordycipitaceae | 0.114166032  | 0.001991216 | 0.084840998 |
| g MGYG-HGUT-04190 | g unidentified                 | 0.040258407  | 0.277016926 | 0.654270214 |
| g UCG-010         | g Verticillium                 | 0.019972346  | 0.589802519 | 0.842338356 |
| g UCG-010         | g unclassified Tremellomycetes | -0.019859557 | 0.591905301 | 0.843006984 |
| g UCG-010         | g Candida                      | -0.03181976  | 0.390309353 | 0.72965864  |
| g UCG-010         | g Cladosporium                 | 0.030122053  | 0.416102762 | 0.743976838 |
| g UCG-010         | g Debaryomyces                 | -0.15353961  | 3.06E-05    | 0.011128631 |
| g UCG-010         | g Aspergillus                  | 0.046171961  | 0.212441308 | 0.600680647 |
| g UCG-010         | g Kazachstania                 | -0.01522488  | 0.681105794 | 0.886955574 |
| g UCG-010         | g Malassezia                   | 0.04412524   | 0.233436413 | 0.617660948 |
| g UCG-010         | g unclassified Fungi           | 0.014899729  | 0.687553715 | 0.890646763 |
| g UCG-010         | g Mycosphaerella               | -0.003216874 | 0.930809779 | 0.975865731 |
| g UCG-010         | g Simplicillium                | -0.018155909 | 0.624075967 | 0.8570016   |
| g UCG-010         | g unclassified Cordycipitaceae | 0.049441925  | 0.181781132 | 0.575010893 |
| g UCG-010         | g unidentified                 | 0.023068588  | 0.533467758 | 0.811502452 |
| g MGYG-HGUT-00476 | g Verticillium                 | 0.008902327  | 0.810109191 | 0.933608688 |
| g MGYG-HGUT-00476 | g unclassified Tremellomycetes | -0.013514835 | 0.715266618 | 0.902925307 |
| g MGYG-HGUT-00476 | g Candida                      | 0.007292372  | 0.843961232 | 0.947111496 |
| g MGYG-HGUT-00476 | g Cladosporium                 | 0.036192995  | 0.32847214  | 0.684175878 |
| g MGYG-HGUT-00476 | g Debaryomyces                 | -0.144678196 | 8.65E-05    | 0.018295299 |
| g MGYG-HGUT-00476 | g Aspergillus                  | 0.071871016  | 0.052092996 | 0.391511425 |
| g MGYG-HGUT-00476 | g Kazachstania                 | -0.031294611 | 0.398182459 | 0.733431989 |
| g MGYG-HGUT-00476 | g Malassezia                   | 0.02486281   | 0.502112595 | 0.793568839 |
| g MGYG-HGUT-00476 | g unclassified Fungi           | 0.031440576  | 0.395984609 | 0.732270187 |
| g MGYG-HGUT-00476 | g Mycosphaerella               | -0.039688593 | 0.283878691 | 0.658002559 |
| g MGYG-HGUT-00476 | g Simplicillium                | -0.019706576 | 0.594762856 | 0.844389068 |
| g MGYG-HGUT-00476 | g unclassified Cordycipitaceae | 0.049278424  | 0.183231834 | 0.57555087  |
| g MGYG-HGUT-00476 | g unidentified                 | 0.024933156  | 0.500903373 | 0.792363619 |
| g MGYG-HGUT-02913 | g Verticillium                 | 0.042725857  | 0.248611096 | 0.63117969  |
| g MGYG-HGUT-02913 | g unclassified Tremellomycetes | -0.066908215 | 0.070617603 | 0.439536772 |
| g MGYG-HGUT-02913 | g Candida                      | 0.002521269  | 0.945745008 | 0.980291673 |
| g MGYG-HGUT-02913 | g Cladosporium                 | 0.0079759    | 0.829549895 | 0.940630371 |
| g MGYG-HGUT-02913 | g Debaryomyces                 | -0.03714729  | 0.315870938 | 0.675194937 |
| g MGYG-HGUT-02913 | g Aspergillus                  | 0.085728926  | 0.020440829 | 0.275117443 |
| g MGYG-HGUT-02913 | g Kazachstania                 | 0.010246237  | 0.782117362 | 0.922260522 |
| g MGYG-HGUT-02913 | g Malassezia                   | 0.023222464  | 0.530740469 | 0.811251718 |
| g MGYG-HGUT-02913 | g unclassified Fungi           | 0.073613897  | 0.04663571  | 0.375045907 |
| g MGYG-HGUT-02913 | g Mycosphaerella               | 0.029463213  | 0.426376978 | 0.749727648 |
| g MGYG-HGUT-02913 | g Simplicillium                | -0.036410561 | 0.325570988 | 0.682100836 |
| g MGYG-HGUT-02913 | g unclassified Cordycipitaceae | 0.008172212  | 0.825421229 | 0.939308882 |
| g MGYG-HGUT-02913 | g unidentified                 | 0.088311312  | 0.016928569 | 0.254457558 |
| g MGYG-HGUT-00894 | g Verticillium                 | 0.017812192  | 0.630656915 | 0.860229872 |
| g MGYG-HGUT-00894 | g unclassified Tremellomycetes | -0.007793199 | 0.833396519 | 0.941769117 |
| g MGYG-HGUT-00894 | g Candida                      | -0.004064215 | 0.912649968 | 0.970712814 |
| g MGYG-HGUT-00894 | g Cladosporium                 | 0.020220804  | 0.585182573 | 0.840014196 |
| g MGYG-HGUT-00894 | g Debaryomyces                 | 0.032178121  | 0.384991351 | 0.725207645 |
| g MGYG-HGUT-00894 | g Aspergillus                  | -0.009327499 | 0.801225345 | 0.930555602 |
| g MGYG-HGUT-00894 | g Kazachstania                 | -0.004518847 | 0.90292463  | 0.966636316 |
| g MGYG-HGUT-00894 | g Malassezia                   | 0.029472024  | 0.426238609 | 0.749727648 |
| g MGYG-HGUT-00894 | g unclassified Fungi           | -0.024064726 | 0.515938421 | 0.802695096 |
| g MGYG-HGUT-00894 | g Mycosphaerella               | 0.059867971  | 0.105806667 | 0.486782157 |
| g MGYG-HGUT-00894 | g Simplicillium                | 0.001313637  | 0.971716095 | 0.989767997 |
| g MGYG-HGUT-00894 | g unclassified Cordycipitaceae | 0.043665706  | 0.238345519 | 0.622892944 |
| g MGYG-HGUT-00894 | g unidentified                 | -0.023100958 | 0.53289345  | 0.811490628 |
| g MGYG-HGUT-04108 | g Verticillium                 | 0.054285654  | 0.142568914 | 0.537656537 |
| g MGYG-HGUT-04108 | g unclassified Tremellomycetes | -0.103342435 | 0.005161459 | 0.140037979 |
| g MGYG-HGUT-04108 | g Candida                      | 0.007700921  | 0.83534089  | 0.942615976 |
| g MGYG-HGUT-04108 | g Cladosporium                 | 0.035860021  | 0.332944488 | 0.688465429 |
| g MGYG-HGUT-04108 | g Debaryomyces                 | -0.12756273  | 0.00054593  | 0.045221636 |
| g MGYG-HGUT-04108 | g Aspergillus                  | 0.105968569  | 0.004127493 | 0.125509006 |
| g MGYG-HGUT-04108 | g Kazachstania                 | -0.088011913 | 0.017306671 | 0.256989733 |

|                   |                                |              |             |             |
|-------------------|--------------------------------|--------------|-------------|-------------|
| g MGYG-HGUT-04108 | g Malassezia                   | 0.01892262   | 0.609504207 | 0.851291399 |
| g MGYG-HGUT-04108 | g unclassified Fungi           | 0.065925817  | 0.074859386 | 0.444519981 |
| g MGYG-HGUT-04108 | g Mycosphaerella               | 0.011593788  | 0.754329701 | 0.91153556  |
| g MGYG-HGUT-04108 | g Simplicillium                | 0.023729599  | 0.5218023   | 0.805467412 |
| g MGYG-HGUT-04108 | g unclassified Cordycipitaceae | 0.056111876  | 0.129596371 | 0.517527876 |
| g MGYG-HGUT-04108 | g unidentified                 | 0.047910334  | 0.195707368 | 0.585186599 |
| g MGYG-HGUT-04231 | g Verticillium                 | 0.036272596  | 0.327408754 | 0.682956719 |
| g MGYG-HGUT-04231 | g unclassified Tremellomycetes | -0.027580099 | 0.456544415 | 0.766727979 |
| g MGYG-HGUT-04231 | g Candida                      | -0.05920015  | 0.10976311  | 0.492584069 |
| g MGYG-HGUT-04231 | g Cladosporium                 | 0.032196995  | 0.384712502 | 0.725207645 |
| g MGYG-HGUT-04231 | g Debaryomyces                 | -0.102506104 | 0.005536723 | 0.144063562 |
| g MGYG-HGUT-04231 | g Aspergillus                  | 0.036202927  | 0.328339332 | 0.684088759 |
| g MGYG-HGUT-04231 | g Kazachstania                 | -0.066574729 | 0.072034907 | 0.442158914 |
| g MGYG-HGUT-04231 | g Malassezia                   | 0.02759874   | 0.456240034 | 0.766581778 |
| g MGYG-HGUT-04231 | g unclassified Fungi           | 0.017015765  | 0.646017755 | 0.868083795 |
| g MGYG-HGUT-04231 | g Mycosphaerella               | -0.058455115 | 0.114313721 | 0.497329568 |
| g MGYG-HGUT-04231 | g Simplicillium                | 0.024601181  | 0.506623329 | 0.796550563 |
| g MGYG-HGUT-04231 | g unclassified Cordycipitaceae | 0.036174522  | 0.328719243 | 0.684206732 |
| g MGYG-HGUT-04231 | g unidentified                 | -0.052843733 | 0.153496635 | 0.550610642 |
| g MGYG-HGUT-03529 | g Verticillium                 | 0.085802232  | 0.020332988 | 0.274093852 |
| g MGYG-HGUT-03529 | g unclassified Tremellomycetes | -0.044253437 | 0.232079764 | 0.617517742 |
| g MGYG-HGUT-03529 | g Candida                      | -0.080806197 | 0.02891873  | 0.31117391  |
| g MGYG-HGUT-03529 | g Cladosporium                 | 0.011318804  | 0.759975689 | 0.914014072 |
| g MGYG-HGUT-03529 | g Debaryomyces                 | -0.146752425 | 6.82E-05    | 0.016033671 |
| g MGYG-HGUT-03529 | g Aspergillus                  | 0.051113334  | 0.167436049 | 0.563342385 |
| g MGYG-HGUT-03529 | g Kazachstania                 | -0.01499243  | 0.685713061 | 0.88924211  |
| g MGYG-HGUT-03529 | g Malassezia                   | 0.038107181  | 0.303519689 | 0.669409574 |
| g MGYG-HGUT-03529 | g unclassified Fungi           | 0.032518255  | 0.379984951 | 0.722551797 |
| g MGYG-HGUT-03529 | g Mycosphaerella               | -0.023208502 | 0.530987643 | 0.811415841 |
| g MGYG-HGUT-03529 | g Simplicillium                | 0.01307939   | 0.724060289 | 0.906424463 |
| g MGYG-HGUT-03529 | g unclassified Cordycipitaceae | 0.074028998  | 0.045409245 | 0.370793362 |
| g MGYG-HGUT-03529 | g unidentified                 | 0.032757143  | 0.37649277  | 0.720393079 |
| g MGYG-HGUT-00366 | g Verticillium                 | 0.045051958  | 0.223755088 | 0.610957608 |
| g MGYG-HGUT-00366 | g unclassified Tremellomycetes | -0.05145915  | 0.164576994 | 0.561723687 |
| g MGYG-HGUT-00366 | g Candida                      | -0.067681211 | 0.06742005  | 0.433701498 |
| g MGYG-HGUT-00366 | g Cladosporium                 | 0.016264733  | 0.660642507 | 0.876274631 |
| g MGYG-HGUT-00366 | g Debaryomyces                 | -0.148940231 | 5.29E-05    | 0.013389478 |
| g MGYG-HGUT-00366 | g Aspergillus                  | 0.064552118  | 0.081136608 | 0.452126167 |
| g MGYG-HGUT-00366 | g Kazachstania                 | -0.040188226 | 0.27785911  | 0.654910321 |
| g MGYG-HGUT-00366 | g Malassezia                   | 0.056624883  | 0.126121959 | 0.51233112  |
| g MGYG-HGUT-00366 | g unclassified Fungi           | 0.027318652  | 0.460825439 | 0.769075712 |
| g MGYG-HGUT-00366 | g Mycosphaerella               | -0.004034935 | 0.913276782 | 0.970799924 |
| g MGYG-HGUT-00366 | g Simplicillium                | 0.009728286  | 0.792874408 | 0.927022902 |
| g MGYG-HGUT-00366 | g unclassified Cordycipitaceae | 0.040064817  | 0.279335389 | 0.656580873 |
| g MGYG-HGUT-00366 | g unidentified                 | 0.047638688  | 0.198256743 | 0.58591995  |
| g UBA1206         | g Verticillium                 | 0.037994589  | 0.30495164  | 0.670057703 |
| g UBA1206         | g unclassified Tremellomycetes | -0.058472148 | 0.114208054 | 0.497329568 |
| g UBA1206         | g Candida                      | -0.054375347 | 0.141909381 | 0.537119624 |
| g UBA1206         | g Cladosporium                 | -0.023129735 | 0.532383145 | 0.811490628 |
| g UBA1206         | g Debaryomyces                 | -0.122621129 | 0.000893171 | 0.057282013 |
| g UBA1206         | g Aspergillus                  | 0.047773087  | 0.196992405 | 0.58576073  |
| g UBA1206         | g Kazachstania                 | -0.071679362 | 0.052724385 | 0.394575277 |
| g UBA1206         | g Malassezia                   | 0.06129954   | 0.097706082 | 0.477597322 |
| g UBA1206         | g unclassified Fungi           | 0.064820404  | 0.079878238 | 0.45101344  |
| g UBA1206         | g Mycosphaerella               | 0.011544977  | 0.755330933 | 0.911989902 |
| g UBA1206         | g Simplicillium                | -0.04729229  | 0.201542706 | 0.590128643 |
| g UBA1206         | g unclassified Cordycipitaceae | 0.041745129  | 0.259648033 | 0.638383329 |
| g UBA1206         | g unidentified                 | 0.078943835  | 0.032835895 | 0.325650834 |
| g MGYG-HGUT-03105 | g Verticillium                 | 0.049302126  | 0.183021002 | 0.575379752 |
| g MGYG-HGUT-03105 | g unclassified Tremellomycetes | -0.042323462 | 0.253099303 | 0.634066482 |
| g MGYG-HGUT-03105 | g Candida                      | -0.044222313 | 0.232408619 | 0.617638717 |
| g MGYG-HGUT-03105 | g Cladosporium                 | 0.013759527  | 0.710341533 | 0.902091837 |
| g MGYG-HGUT-03105 | g Debaryomyces                 | -0.102949362 | 0.005334878 | 0.14083337  |
| g MGYG-HGUT-03105 | g Aspergillus                  | 0.075559566  | 0.041118906 | 0.354621246 |
| g MGYG-HGUT-03105 | g Kazachstania                 | 0.005939599  | 0.872632465 | 0.956713297 |
| g MGYG-HGUT-03105 | g Malassezia                   | 0.006192239  | 0.86726405  | 0.955196913 |
| g MGYG-HGUT-03105 | g unclassified Fungi           | 0.074714523  | 0.043443211 | 0.363506278 |
| g MGYG-HGUT-03105 | g Mycosphaerella               | -0.006768448 | 0.85504321  | 0.950427981 |
| g MGYG-HGUT-03105 | g Simplicillium                | -0.055782687 | 0.131864623 | 0.519596883 |
| g MGYG-HGUT-03105 | g unclassified Cordycipitaceae | 0.09220232   | 0.012633986 | 0.219768851 |
| g MGYG-HGUT-03105 | g unidentified                 | 0.018323728  | 0.620873641 | 0.856123107 |
| g QAMX01          | g Verticillium                 | 0.051244929  | 0.166343721 | 0.562541523 |
| g QAMX01          | g unclassified Tremellomycetes | -0.036913682 | 0.318925988 | 0.676514899 |
| g QAMX01          | g Candida                      | 0.009457061  | 0.798523216 | 0.929569806 |
| g QAMX01          | g Cladosporium                 | 0.021250852  | 0.566210719 | 0.829654737 |
| g QAMX01          | g Debaryomyces                 | -0.147859742 | 6.00E-05    | 0.014423241 |
| g QAMX01          | g Aspergillus                  | 0.083307798  | 0.024293482 | 0.290150819 |
| g QAMX01          | g Kazachstania                 | -0.051942924 | 0.16063914  | 0.55773065  |

|                   |                                |              |             |              |
|-------------------|--------------------------------|--------------|-------------|--------------|
| g QAMX01          | g Malassezia                   | 0.049665001  | 0.17981558  | 0.574692983  |
| g QAMX01          | g unclassified Fungi           | 0.057019808  | 0.123496935 | 0.508632924  |
| g QAMX01          | g Mycosphaerella               | 0.002697861  | 0.941951421 | 0.978613814  |
| g QAMX01          | g Simplicillium                | -0.023070209 | 0.533438998 | 0.811502452  |
| g QAMX01          | g unclassified Cordycipitaceae | 0.051273647  | 0.166106058 | 0.562541523  |
| g QAMX01          | g unidentified                 | 0.031685246  | 0.392316954 | 0.730511702  |
| g UBA644          | g Verticillium                 | 0.017668747  | 0.633412095 | 0.861635763  |
| g UBA644          | g unclassified Tremellomycetes | -0.095162892 | 0.010042527 | 0.194277908  |
| g UBA644          | g Candida                      | -0.047879869 | 0.195992085 | 0.582529221  |
| g UBA644          | g Cladosporium                 | -0.013947675 | 0.706562747 | 0.9002826    |
| g UBA644          | g Debaryomyces                 | -0.176831202 | 1.50E-06    | 0.00397759   |
| g UBA644          | g Aspergillus                  | 0.031590883  | 0.393729039 | 0.730757316  |
| g UBA644          | g Kazachstania                 | -0.054619815 | 0.140123636 | 0.533896229  |
| g UBA644          | g Malassezia                   | 0.040892397  | 0.269515917 | 0.6470094    |
| g UBA644          | g unclassified Fungi           | 0.013915275  | 0.707212971 | 0.900459612  |
| g UBA644          | g Mycosphaerella               | -0.026494298 | 0.474469201 | 0.776017478  |
| g UBA644          | g Simplicillium                | 9.81E-05     | 0.997887291 | 0.998643711  |
| g UBA644          | g unclassified Cordycipitaceae | 0.033820625  | 0.36118732  | 0.7111747526 |
| g UBA644          | g unidentified                 | 0.045587463  | 0.218293118 | 0.60629338   |
| g MGYG-HGUT-04147 | g Verticillium                 | 0.049549434  | 0.180831881 | 0.575010893  |
| g MGYG-HGUT-04147 | g unclassified Tremellomycetes | -0.039806848 | 0.282445281 | 0.657175895  |
| g MGYG-HGUT-04147 | g Candida                      | -0.004889222 | 0.895012362 | 0.96495896   |
| g MGYG-HGUT-04147 | g Cladosporium                 | 0.035994667  | 0.331131282 | 0.687064947  |
| g MGYG-HGUT-04147 | g Debaryomyces                 | -0.113717029 | 0.002074869 | 0.08644199   |
| g MGYG-HGUT-04147 | g Aspergillus                  | 0.077682025  | 0.035740332 | 0.336718155  |
| g MGYG-HGUT-04147 | g Kazachstania                 | 0.0102465    | 0.782111912 | 0.922260522  |
| g MGYG-HGUT-04147 | g Malassezia                   | 0.050722085  | 0.170715435 | 0.564974052  |
| g MGYG-HGUT-04147 | g unclassified Fungi           | 0.046579253  | 0.208431032 | 0.597903264  |
| g MGYG-HGUT-04147 | g Mycosphaerella               | -0.016461233 | 0.656803283 | 0.87431013   |
| g MGYG-HGUT-04147 | g Simplicillium                | -0.04440733  | 0.230458578 | 0.615370343  |
| g MGYG-HGUT-04147 | g unclassified Cordycipitaceae | 0.093421418  | 0.011502779 | 0.208786284  |
| g MGYG-HGUT-04147 | g unidentified                 | 0.024997815  | 0.499793293 | 0.791370491  |
| g MGYG-HGUT-01818 | g Verticillium                 | 0.090165955  | 0.014743673 | 0.234966185  |
| g MGYG-HGUT-01818 | g unclassified Tremellomycetes | -0.087775736 | 0.017610126 | 0.258102986  |
| g MGYG-HGUT-01818 | g Candida                      | -0.031236453 | 0.399060205 | 0.734026611  |
| g MGYG-HGUT-01818 | g Cladosporium                 | 0.011577843  | 0.754656728 | 0.911600966  |
| g MGYG-HGUT-01818 | g Debaryomyces                 | -0.09886801  | 0.007471195 | 0.16714627   |
| g MGYG-HGUT-01818 | g Aspergillus                  | 0.060513418  | 0.102090887 | 0.480785831  |
| g MGYG-HGUT-01818 | g Kazachstania                 | -0.031753765 | 0.391293543 | 0.729890405  |
| g MGYG-HGUT-01818 | g Malassezia                   | 0.057181446  | 0.122434903 | 0.506761447  |
| g MGYG-HGUT-01818 | g unclassified Fungi           | 0.053168394  | 0.150982343 | 0.547949889  |
| g MGYG-HGUT-01818 | g Mycosphaerella               | 0.007214077  | 0.845615417 | 0.947820248  |
| g MGYG-HGUT-01818 | g Simplicillium                | -0.039392718 | 0.287486569 | 0.659362601  |
| g MGYG-HGUT-01818 | g unclassified Cordycipitaceae | 0.075103359  | 0.042360302 | 0.358790655  |
| g MGYG-HGUT-01818 | g unidentified                 | 0.048306043  | 0.192036712 | 0.581297022  |
| g MGYG-HGUT-04124 | g Verticillium                 | -0.017580969 | 0.635100564 | 0.862393708  |
| g MGYG-HGUT-04124 | g unclassified Tremellomycetes | -0.048766775 | 0.187826847 | 0.577785957  |
| g MGYG-HGUT-04124 | g Candida                      | -0.027589567 | 0.45638981  | 0.766589995  |
| g MGYG-HGUT-04124 | g Cladosporium                 | 0.023395113  | 0.527688874 | 0.808944748  |
| g MGYG-HGUT-04124 | g Debaryomyces                 | -0.099954592 | 0.006838161 | 0.157937767  |
| g MGYG-HGUT-04124 | g Aspergillus                  | 0.098192909  | 0.007890441 | 0.171099695  |
| g MGYG-HGUT-04124 | g Kazachstania                 | -0.004154253 | 0.910722822 | 0.969560969  |
| g MGYG-HGUT-04124 | g Malassezia                   | 0.059821093  | 0.106080654 | 0.486808137  |
| g MGYG-HGUT-04124 | g unclassified Fungi           | 0.062523657  | 0.091178643 | 0.470392034  |
| g MGYG-HGUT-04124 | g Mycosphaerella               | 0.017265531  | 0.641183837 | 0.864552417  |
| g MGYG-HGUT-04124 | g Simplicillium                | 0.031032597  | 0.402146072 | 0.736374759  |
| g MGYG-HGUT-04124 | g unclassified Cordycipitaceae | 0.035310136  | 0.340415761 | 0.694699556  |
| g MGYG-HGUT-04124 | g unidentified                 | 0.049949141  | 0.177334873 | 0.572994695  |
| g Lachnospira     | g Verticillium                 | -0.034858056 | 0.346637822 | 0.697873429  |
| g Lachnospira     | g unclassified Tremellomycetes | -0.052244472 | 0.158220776 | 0.554768804  |
| g Lachnospira     | g Candida                      | -0.019340306 | 0.601629911 | 0.847503689  |
| g Lachnospira     | g Cladosporium                 | -0.00741883  | 0.84129095  | 0.945770831  |
| g Lachnospira     | g Debaryomyces                 | 0.012653288  | 0.732700622 | 0.907315107  |
| g Lachnospira     | g Aspergillus                  | -0.071114437 | 0.054622727 | 0.399257624  |
| g Lachnospira     | g Kazachstania                 | -0.010073912 | 0.785691794 | 0.924209712  |
| g Lachnospira     | g Malassezia                   | -0.047953289 | 0.195306454 | 0.584648627  |
| g Lachnospira     | g unclassified Fungi           | 0.010462742  | 0.777633057 | 0.920872092  |
| g Lachnospira     | g Mycosphaerella               | -0.10289749  | 0.005358151 | 0.141044652  |
| g Lachnospira     | g Simplicillium                | -0.011896268 | 0.748134264 | 0.910244784  |
| g Lachnospira     | g unclassified Cordycipitaceae | -0.012638167 | 0.733007884 | 0.907315107  |
| g Lachnospira     | g unidentified                 | -0.023904989 | 0.518729155 | 0.80396368   |
| g Eubacterium F   | g Verticillium                 | 0.108847095  | 0.003212647 | 0.111269104  |
| g Eubacterium F   | g unclassified Tremellomycetes | -0.061959489 | 0.094142165 | 0.47324932   |
| g Eubacterium F   | g Candida                      | -0.06244049  | 0.091610752 | 0.470392034  |
| g Eubacterium F   | g Cladosporium                 | 0.002035209  | 0.956192761 | 0.983900408  |
| g Eubacterium F   | g Debaryomyces                 | -0.141255099 | 0.000127205 | 0.018928692  |
| g Eubacterium F   | g Aspergillus                  | 0.008494733  | 0.818648753 | 0.936487497  |
| g Eubacterium F   | g Kazachstania                 | -0.041918873 | 0.257668469 | 0.637448375  |



|                 |                                |              |             |             |
|-----------------|--------------------------------|--------------|-------------|-------------|
| g Eubacterium F | g Malassezia                   | 0.034263763  | 0.354926362 | 0.705850547 |
| g Eubacterium F | g unclassified Fungi           | 0.069559258  | 0.06014444  | 0.412830947 |
| g Eubacterium F | g Mycosphaerella               | -0.030754634 | 0.406376649 | 0.738371858 |
| g Eubacterium F | g Simplicillium                | -0.024357907 | 0.510836625 | 0.799135489 |
| g Eubacterium F | g unclassified Cordycipitaceae | 0.080570507  | 0.029391155 | 0.312580107 |
| g Eubacterium F | g unidentified                 | 0.009320705  | 0.801367111 | 0.930555602 |
| g Acetatifactor | g Verticillium                 | 0.081710213  | 0.027166695 | 0.305021761 |
| g Acetatifactor | g unclassified Tremellomycetes | -0.035441438 | 0.338622103 | 0.693255567 |
| g Acetatifactor | g Candida                      | -0.045238655 | 0.221839875 | 0.608362696 |
| g Acetatifactor | g Cladosporium                 | 2.70E-05     | 0.999419243 | 0.999513697 |
| g Acetatifactor | g Debaryomyces                 | -0.105561106 | 0.004274517 | 0.126348985 |
| g Acetatifactor | g Aspergillus                  | 0.02448312   | 0.508665764 | 0.798383435 |
| g Acetatifactor | g Kazachstania                 | -0.097529415 | 0.008322844 | 0.17418732  |
| g Acetatifactor | g Malassezia                   | 0.024604689  | 0.506562708 | 0.796550563 |
| g Acetatifactor | g unclassified Fungi           | 0.084150209  | 0.022887134 | 0.283684623 |
| g Acetatifactor | g Mycosphaerella               | -0.039436157 | 0.286954955 | 0.659118154 |
| g Acetatifactor | g Simplicillium                | 0.016452671  | 0.65697038  | 0.87431013  |
| g Acetatifactor | g unclassified Cordycipitaceae | 0.009973575  | 0.787775087 | 0.925277255 |
| g Acetatifactor | g unidentified                 | 0.02367796   | 0.52270887  | 0.805852786 |
| g Faecalicatena | g Verticillium                 | -0.04071808  | 0.271564332 | 0.649109772 |
| g Faecalicatena | g unclassified Tremellomycetes | 0.018136108  | 0.62445428  | 0.8570016   |
| g Faecalicatena | g Candida                      | -0.068005474 | 0.066114584 | 0.428166785 |
| g Faecalicatena | g Cladosporium                 | 0.08291646   | 0.024971829 | 0.293745688 |
| g Faecalicatena | g Debaryomyces                 | 0.00501112   | 0.89241051  | 0.963948577 |
| g Faecalicatena | g Aspergillus                  | 0.006354305  | 0.863823439 | 0.953825789 |
| g Faecalicatena | g Kazachstania                 | -0.00647317  | 0.861301611 | 0.953015155 |
| g Faecalicatena | g Malassezia                   | 0.00044989   | 0.990311633 | 0.996337488 |
| g Faecalicatena | g unclassified Fungi           | -0.073333121 | 0.047480974 | 0.377185783 |
| g Faecalicatena | g Mycosphaerella               | -0.018187025 | 0.623481671 | 0.856841954 |
| g Faecalicatena | g Simplicillium                | -0.001767379 | 0.961953015 | 0.986088037 |
| g Faecalicatena | g unclassified Cordycipitaceae | 0.029677915  | 0.423012727 | 0.746980426 |
| g Faecalicatena | g unidentified                 | -0.014257937 | 0.700347175 | 0.896722014 |
| g Roseburia     | g Verticillium                 | 0.011752317  | 0.751080684 | 0.910387945 |
| g Roseburia     | g unclassified Tremellomycetes | 0.010512218  | 0.776609316 | 0.920334072 |
| g Roseburia     | g Candida                      | -0.04777678  | 0.196957747 | 0.58576073  |
| g Roseburia     | g Cladosporium                 | 0.004426269  | 0.904903895 | 0.967495419 |
| g Roseburia     | g Debaryomyces                 | 0.00126984   | 0.972658715 | 0.990221507 |
| g Roseburia     | g Aspergillus                  | -0.077347514 | 0.036546017 | 0.339832999 |
| g Roseburia     | g Kazachstania                 | -0.051050526 | 0.167959292 | 0.563342385 |
| g Roseburia     | g Malassezia                   | -0.00153004  | 0.967059168 | 0.988470889 |
| g Roseburia     | g unclassified Fungi           | 0.022175007  | 0.549443989 | 0.818327416 |
| g Roseburia     | g Mycosphaerella               | -0.081636629 | 0.027305806 | 0.305416237 |
| g Roseburia     | g Simplicillium                | -0.001734838 | 0.962653032 | 0.986228955 |
| g Roseburia     | g unclassified Cordycipitaceae | -0.005777938 | 0.87607075  | 0.957801213 |
| g Roseburia     | g unidentified                 | -0.018866963 | 0.610556907 | 0.851291399 |
| g Blautia A     | g Verticillium                 | -0.0208818   | 0.572974155 | 0.833775097 |
| g Blautia A     | g unclassified Tremellomycetes | 0.095514848  | 0.009768262 | 0.191675484 |
| g Blautia A     | g Candida                      | -0.019352564 | 0.601399526 | 0.847503689 |
| g Blautia A     | g Cladosporium                 | 0.005118415  | 0.89012129  | 0.962904765 |
| g Blautia A     | g Debaryomyces                 | -0.045317373 | 0.221035879 | 0.607375142 |
| g Blautia A     | g Aspergillus                  | 0.067235007  | 0.069250974 | 0.438023791 |
| g Blautia A     | g Kazachstania                 | -0.053193592 | 0.150788521 | 0.547949889 |
| g Blautia A     | g Malassezia                   | -0.012194422 | 0.74204326  | 0.909480234 |
| g Blautia A     | g unclassified Fungi           | 0.024390355  | 0.510273604 | 0.798892628 |
| g Blautia A     | g Mycosphaerella               | -0.037482342 | 0.311522809 | 0.672399691 |
| g Blautia A     | g Simplicillium                | 0.070128553  | 0.058071814 | 0.407963088 |
| g Blautia A     | g unclassified Cordycipitaceae | 0.013725766  | 0.711020352 | 0.902091837 |
| g Blautia A     | g unidentified                 | 0.016001059  | 0.665808207 | 0.879421986 |
| g Clostridium M | g Verticillium                 | -0.045228806 | 0.221940619 | 0.608439282 |
| g Clostridium M | g unclassified Tremellomycetes | 0.079062465  | 0.032573508 | 0.325489007 |
| g Clostridium M | g Candida                      | 0.033546177  | 0.36509936  | 0.713953478 |
| g Clostridium M | g Cladosporium                 | 0.049829596  | 0.178375452 | 0.573729188 |
| g Clostridium M | g Debaryomyces                 | 0.11878877   | 0.001292697 | 0.069438167 |
| g Clostridium M | g Aspergillus                  | -0.059706777 | 0.106751154 | 0.487777626 |
| g Clostridium M | g Kazachstania                 | 0.051213496  | 0.166604152 | 0.562541523 |
| g Clostridium M | g Malassezia                   | 0.011767005  | 0.750779871 | 0.910387945 |
| g Clostridium M | g unclassified Fungi           | -0.083077529 | 0.024690674 | 0.292809257 |
| g Clostridium M | g Mycosphaerella               | -0.024234812 | 0.51297545  | 0.800871379 |
| g Clostridium M | g Simplicillium                | 0.001910968  | 0.958864552 | 0.984847119 |
| g Clostridium M | g unclassified Cordycipitaceae | 0.010600424  | 0.774785185 | 0.919248439 |
| g Clostridium M | g unidentified                 | -0.119021459 | 0.001264381 | 0.06826367  |
| g Dorea         | g Verticillium                 | -0.040557049 | 0.273466057 | 0.650734837 |
| g Dorea         | g unclassified Tremellomycetes | 0.035253786  | 0.341187404 | 0.694699556 |
| g Dorea         | g Candida                      | -0.06556279  | 0.076478479 | 0.446713721 |
| g Dorea         | g Cladosporium                 | 0.062143189  | 0.093168864 | 0.471954484 |
| g Dorea         | g Debaryomyces                 | -0.092404458 | 0.012439881 | 0.21883174  |
| g Dorea         | g Aspergillus                  | 0.035088491  | 0.34345733  | 0.695591476 |
| g Dorea         | g Kazachstania                 | -0.02476054  | 0.503873289 | 0.794869878 |

|                 |                                |              |             |             |
|-----------------|--------------------------------|--------------|-------------|-------------|
| g Dorea         | g Malassezia                   | -0.064402253 | 0.081846498 | 0.453692848 |
| g Dorea         | g unclassified Fungi           | 0.012065075  | 0.744683748 | 0.909574751 |
| g Dorea         | g Mycosphaerella               | -0.077511867 | 0.036148256 | 0.337675685 |
| g Dorea         | g Simplicillium                | 0.063193546  | 0.087757491 | 0.465488609 |
| g Dorea         | g unclassified Cordycipitaceae | 0.0006246    | 0.986549571 | 0.994713676 |
| g Dorea         | g unidentified                 | 0.031553228  | 0.39429337  | 0.730848211 |
| g Clostridium Q | g Verticillium                 | -0.012097452 | 0.744022524 | 0.909574751 |
| g Clostridium Q | g unclassified Tremellomycetes | 0.053945965  | 0.145088017 | 0.540332211 |
| g Clostridium Q | g Candida                      | -0.037602623 | 0.309971525 | 0.672249972 |
| g Clostridium Q | g Cladosporium                 | 0.015630701  | 0.673090721 | 0.882279946 |
| g Clostridium Q | g Debaryomyces                 | 0.022125244  | 0.550340571 | 0.81897116  |
| g Clostridium Q | g Aspergillus                  | 0.004737403  | 0.898254436 | 0.965498064 |
| g Clostridium Q | g Kazachstania                 | 0.02290571   | 0.53636228  | 0.813415158 |
| g Clostridium Q | g Malassezia                   | -0.016604247 | 0.654014735 | 0.872734417 |
| g Clostridium Q | g unclassified Fungi           | -0.043948533 | 0.235315602 | 0.619373537 |
| g Clostridium Q | g Mycosphaerella               | -0.054954991 | 0.137703405 | 0.530187936 |
| g Clostridium Q | g Simplicillium                | -0.013250415 | 0.720602077 | 0.905336886 |
| g Clostridium Q | g unclassified Cordycipitaceae | 0.019010416  | 0.607845279 | 0.851291399 |
| g Clostridium Q | g unidentified                 | -0.020801033 | 0.574459404 | 0.834736537 |
| g CAG-81        | g Verticillium                 | -0.00753573  | 0.838824095 | 0.944502721 |
| g CAG-81        | g unclassified Tremellomycetes | 0.04534479   | 0.220756338 | 0.607237735 |
| g CAG-81        | g Candida                      | -0.039223126 | 0.28956842  | 0.660061436 |
| g CAG-81        | g Cladosporium                 | 0.046697736  | 0.207274772 | 0.597418526 |
| g CAG-81        | g Debaryomyces                 | -0.012471177 | 0.736403822 | 0.907602097 |
| g CAG-81        | g Aspergillus                  | -0.043279347 | 0.24252882  | 0.626487849 |
| g CAG-81        | g Kazachstania                 | -0.062462139 | 0.091498114 | 0.470392034 |
| g CAG-81        | g Malassezia                   | 0.026543578  | 0.473647404 | 0.775272518 |
| g CAG-81        | g unclassified Fungi           | -0.022349078 | 0.546313413 | 0.816307334 |
| g CAG-81        | g Mycosphaerella               | -0.026081119 | 0.4813901   | 0.780189053 |
| g CAG-81        | g Simplicillium                | 0.013220346  | 0.721209676 | 0.905336886 |
| g CAG-81        | g unclassified Cordycipitaceae | 0.025923741  | 0.484040573 | 0.781048695 |
| g CAG-81        | g unidentified                 | 0.044284806  | 0.231748653 | 0.61716312  |
| g Hungatella A  | g Verticillium                 | 0.035212335  | 0.341755722 | 0.694699556 |
| g Hungatella A  | g unclassified Tremellomycetes | -0.018720968 | 0.613322086 | 0.852887587 |
| g Hungatella A  | g Candida                      | -0.046448924 | 0.209708274 | 0.598807697 |
| g Hungatella A  | g Cladosporium                 | 0.004174099  | 0.91029811  | 0.969320838 |
| g Hungatella A  | g Debaryomyces                 | -0.100990368 | 0.006279948 | 0.150048656 |
| g Hungatella A  | g Aspergillus                  | 0.030062992  | 0.417017789 | 0.744290485 |
| g Hungatella A  | g Kazachstania                 | -0.042155798 | 0.254985911 | 0.635347198 |
| g Hungatella A  | g Malassezia                   | 0.010643211  | 0.773900768 | 0.91855054  |
| g Hungatella A  | g unclassified Fungi           | 0.022371507  | 0.545910688 | 0.816281885 |
| g Hungatella A  | g Mycosphaerella               | -0.030312097 | 0.413166477 | 0.742811081 |
| g Hungatella A  | g Simplicillium                | -0.037575914 | 0.310315558 | 0.672399691 |
| g Hungatella A  | g unclassified Cordycipitaceae | 0.031270778  | 0.398542024 | 0.73383882  |
| g Hungatella A  | g unidentified                 | 0.058086579  | 0.116618835 | 0.500227203 |
| g Coprococcus   | g Verticillium                 | -0.005956299 | 0.872277433 | 0.956423148 |
| g Coprococcus   | g unclassified Tremellomycetes | -0.096293408 | 0.009185106 | 0.184188436 |
| g Coprococcus   | g Candida                      | -0.07651254  | 0.038624734 | 0.345208531 |
| g Coprococcus   | g Cladosporium                 | 0.015241625  | 0.680774358 | 0.886650746 |
| g Coprococcus   | g Debaryomyces                 | -0.132913918 | 0.000314028 | 0.031056454 |
| g Coprococcus   | g Aspergillus                  | 0.080414151  | 0.029708206 | 0.31335365  |
| g Coprococcus   | g Kazachstania                 | -0.078597356 | 0.033612603 | 0.327713401 |
| g Coprococcus   | g Malassezia                   | 0.016997146  | 0.646378707 | 0.868120757 |
| g Coprococcus   | g unclassified Fungi           | 0.097521591  | 0.008328067 | 0.17418732  |
| g Coprococcus   | g Mycosphaerella               | -0.005715197 | 0.877405788 | 0.958174205 |
| g Coprococcus   | g Simplicillium                | -0.004779831 | 0.897348221 | 0.965250198 |
| g Coprococcus   | g unclassified Cordycipitaceae | 0.000180385  | 0.996115336 | 0.998379663 |
| g Coprococcus   | g unidentified                 | 0.113121264  | 0.002190833 | 0.088979156 |
| g TF01-11       | g Verticillium                 | 0.071656479  | 0.052800197 | 0.394662696 |
| g TF01-11       | g unclassified Tremellomycetes | -0.080579009 | 0.029374    | 0.312580107 |
| g TF01-11       | g Candida                      | -0.112287964 | 0.002362989 | 0.09226991  |
| g TF01-11       | g Cladosporium                 | -0.003326531 | 0.928457438 | 0.974599406 |
| g TF01-11       | g Debaryomyces                 | -0.137930978 | 0.00018347  | 0.022444453 |
| g TF01-11       | g Aspergillus                  | 0.05498164   | 0.137512362 | 0.530071323 |
| g TF01-11       | g Kazachstania                 | -0.051206503 | 0.166662127 | 0.562557776 |
| g TF01-11       | g Malassezia                   | 0.012470962  | 0.736408203 | 0.907602097 |
| g TF01-11       | g unclassified Fungi           | 0.107093105  | 0.003745184 | 0.121489271 |
| g TF01-11       | g Mycosphaerella               | -0.049836511 | 0.178315142 | 0.573729188 |
| g TF01-11       | g Simplicillium                | 0.000345954  | 0.99254981  | 0.996941403 |
| g TF01-11       | g unclassified Cordycipitaceae | 0.044747418  | 0.226904458 | 0.612967811 |
| g TF01-11       | g unidentified                 | 0.065138487  | 0.07840686  | 0.450435067 |
| g Agathobacter  | g Verticillium                 | 0.063846299  | 0.084524003 | 0.458565103 |
| g Agathobacter  | g unclassified Tremellomycetes | -0.038437668 | 0.299342342 | 0.667036301 |
| g Agathobacter  | g Candida                      | -0.029841941 | 0.420453008 | 0.74604389  |
| g Agathobacter  | g Cladosporium                 | -0.0205227   | 0.579591673 | 0.836959482 |
| g Agathobacter  | g Debaryomyces                 | -0.05593605  | 0.130804095 | 0.517833494 |
| g Agathobacter  | g Aspergillus                  | 0.003357596  | 0.927791147 | 0.974599406 |
| g Agathobacter  | g Kazachstania                 | -0.05205277  | 0.159754989 | 0.556643823 |

|                   |                                |              |             |             |
|-------------------|--------------------------------|--------------|-------------|-------------|
| g Agathobacter    | g Malassezia                   | 0.033290271  | 0.368770786 | 0.716287162 |
| g Agathobacter    | g unclassified Fungi           | 0.079093209  | 0.032505802 | 0.325188715 |
| g Agathobacter    | g Mycosphaerella               | -0.040960141 | 0.268722712 | 0.645837779 |
| g Agathobacter    | g Simplicillium                | 0.022161743  | 0.5496829   | 0.818568033 |
| g Agathobacter    | g unclassified Cordycipitaceae | 0.046264103  | 0.211529222 | 0.600680647 |
| g Agathobacter    | g unidentified                 | 0.038458453  | 0.2990809   | 0.66688747  |
| g Eubacterium_I   | g Verticillium                 | -0.00956804  | 0.796210566 | 0.928889353 |
| g Eubacterium_I   | g unclassified Tremellomycetes | -0.002352729 | 0.949366778 | 0.982129167 |
| g Eubacterium_I   | g Candida                      | -0.062742538 | 0.090049232 | 0.467796257 |
| g Eubacterium_I   | g Cladosporium                 | -0.001146761 | 0.975307872 | 0.990490577 |
| g Eubacterium_I   | g Debaryomyces                 | -0.04924043  | 0.183570169 | 0.575758478 |
| g Eubacterium_I   | g Aspergillus                  | 0.014631769  | 0.692884625 | 0.893614272 |
| g Eubacterium_I   | g Kazachstania                 | -0.013672482 | 0.712092185 | 0.902091837 |
| g Eubacterium_I   | g Malassezia                   | -0.033711408 | 0.362740965 | 0.713429978 |
| g Eubacterium_I   | g unclassified Fungi           | 0.01566785   | 0.672358834 | 0.881783585 |
| g Eubacterium_I   | g Mycosphaerella               | -0.021397965 | 0.563525366 | 0.828225754 |
| g Eubacterium_I   | g Simplicillium                | 0.043359478  | 0.241656997 | 0.625694724 |
| g Eubacterium_I   | g unclassified Cordycipitaceae | 0.015882114  | 0.668143678 | 0.879827825 |
| g Eubacterium_I   | g unidentified                 | 0.018237343  | 0.622521163 | 0.856123107 |
| g Coprococcus_A   | g Verticillium                 | 0.016923807  | 0.647801274 | 0.869486692 |
| g Coprococcus_A   | g unclassified Tremellomycetes | -0.010008994 | 0.787039516 | 0.925075215 |
| g Coprococcus_A   | g Candida                      | -0.02994869  | 0.418792019 | 0.744941528 |
| g Coprococcus_A   | g Cladosporium                 | 0.02104616   | 0.569957279 | 0.831953372 |
| g Coprococcus_A   | g Debaryomyces                 | -0.10729275  | 0.00368077  | 0.120587953 |
| g Coprococcus_A   | g Aspergillus                  | 0.068416788  | 0.064488637 | 0.423004068 |
| g Coprococcus_A   | g Kazachstania                 | 0.015204638  | 0.681506549 | 0.886955574 |
| g Coprococcus_A   | g Malassezia                   | -0.014136312 | 0.702781365 | 0.897409486 |
| g Coprococcus_A   | g unclassified Fungi           | 0.061201105  | 0.098246761 | 0.477955684 |
| g Coprococcus_A   | g Mycosphaerella               | -0.01657949  | 0.654497122 | 0.872937805 |
| g Coprococcus_A   | g Simplicillium                | -0.019561907 | 0.597470936 | 0.845950003 |
| g Coprococcus_A   | g unclassified Cordycipitaceae | 0.028588412  | 0.440244618 | 0.758246834 |
| g Coprococcus_A   | g unidentified                 | 0.027371215  | 0.459962955 | 0.769075712 |
| g MGYG-HGUT-00280 | g Verticillium                 | -0.00838867  | 0.820874457 | 0.937561364 |
| g MGYG-HGUT-00280 | g unclassified Tremellomycetes | -0.032201663 | 0.384643554 | 0.725207645 |
| g MGYG-HGUT-00280 | g Candida                      | -0.024510788 | 0.508186726 | 0.798377888 |
| g MGYG-HGUT-00280 | g Cladosporium                 | -0.01026773  | 0.781671866 | 0.922249045 |
| g MGYG-HGUT-00280 | g Debaryomyces                 | -0.075132698 | 0.042279527 | 0.358790655 |
| g MGYG-HGUT-00280 | g Aspergillus                  | 0.017045524  | 0.645441013 | 0.868076943 |
| g MGYG-HGUT-00280 | g Kazachstania                 | -0.01961475  | 0.596481105 | 0.845513549 |
| g MGYG-HGUT-00280 | g Malassezia                   | -0.0141386   | 0.702735533 | 0.897409486 |
| g MGYG-HGUT-00280 | g unclassified Fungi           | 0.012699243  | 0.731767125 | 0.907315107 |
| g MGYG-HGUT-00280 | g Mycosphaerella               | 0.011673282  | 0.752699933 | 0.911258836 |
| g MGYG-HGUT-00280 | g Simplicillium                | -0.011547077 | 0.755287846 | 0.911989902 |
| g MGYG-HGUT-00280 | g unclassified Cordycipitaceae | -0.033541925 | 0.36516017  | 0.713953478 |
| g MGYG-HGUT-00280 | g unidentified                 | 0.043240189  | 0.242955664 | 0.626756909 |
| g Blautia         | g Verticillium                 | -0.062120845 | 0.093286817 | 0.472099996 |
| g Blautia         | g unclassified Tremellomycetes | 0.052232676  | 0.158314862 | 0.55491483  |
| g Blautia         | g Candida                      | -0.082175145 | 0.02630178  | 0.300469812 |
| g Blautia         | g Cladosporium                 | 0.043144628  | 0.243999537 | 0.627824375 |
| g Blautia         | g Debaryomyces                 | -0.031394849 | 0.396672356 | 0.732625333 |
| g Blautia         | g Aspergillus                  | 0.011844829  | 0.74918671  | 0.910387945 |
| g Blautia         | g Kazachstania                 | -0.00891482  | 0.809847794 | 0.933584001 |
| g Blautia         | g Malassezia                   | -0.013698909 | 0.711560521 | 0.902091837 |
| g Blautia         | g unclassified Fungi           | -0.046374996 | 0.21043529  | 0.599092342 |
| g Blautia         | g Mycosphaerella               | -0.062318879 | 0.092245551 | 0.471664958 |
| g Blautia         | g Simplicillium                | 0.008798746  | 0.812277228 | 0.934142805 |
| g Blautia         | g unclassified Cordycipitaceae | 0.002118374  | 0.954404553 | 0.983153416 |
| g Blautia         | g unidentified                 | 0.00651646   | 0.86038353  | 0.952959861 |
| g Coprococcus_B   | g Verticillium                 | -0.029030283 | 0.433207906 | 0.754104067 |
| g Coprococcus_B   | g unclassified Tremellomycetes | 0.069397992  | 0.060742561 | 0.412830947 |
| g Coprococcus_B   | g Candida                      | -0.051847537 | 0.161409898 | 0.55873063  |
| g Coprococcus_B   | g Cladosporium                 | 0.026215225  | 0.479137785 | 0.780189053 |
| g Coprococcus_B   | g Debaryomyces                 | -0.096358648 | 0.009137677 | 0.184180766 |
| g Coprococcus_B   | g Aspergillus                  | 0.046571332  | 0.20850849  | 0.597903264 |
| g Coprococcus_B   | g Kazachstania                 | -0.011478198 | 0.75670142  | 0.912213992 |
| g Coprococcus_B   | g Malassezia                   | 0.019611515  | 0.596541689 | 0.845513549 |
| g Coprococcus_B   | g unclassified Fungi           | 0.035864723  | 0.332881063 | 0.688465429 |
| g Coprococcus_B   | g Mycosphaerella               | -0.07305322  | 0.048336359 | 0.378604998 |
| g Coprococcus_B   | g Simplicillium                | -0.022770501 | 0.538771069 | 0.814978906 |
| g Coprococcus_B   | g unclassified Cordycipitaceae | -0.006916626 | 0.851905966 | 0.949400054 |
| g Coprococcus_B   | g unidentified                 | 0.048153989  | 0.193441169 | 0.582538201 |
| g Eisenbergiella  | g Verticillium                 | 0.095814121  | 0.009540315 | 0.187999281 |
| g Eisenbergiella  | g unclassified Tremellomycetes | -0.004174838 | 0.910282302 | 0.969320838 |
| g Eisenbergiella  | g Candida                      | -0.066178055 | 0.073750941 | 0.444184668 |
| g Eisenbergiella  | g Cladosporium                 | 0.056275801  | 0.128478191 | 0.515569288 |
| g Eisenbergiella  | g Debaryomyces                 | -0.112933001 | 0.002228692 | 0.089673068 |
| g Eisenbergiella  | g Aspergillus                  | -0.004468475 | 0.904001488 | 0.967449812 |
| g Eisenbergiella  | g Kazachstania                 | -0.060215195 | 0.103794638 | 0.483414571 |

|                   |                                |              |             |             |
|-------------------|--------------------------------|--------------|-------------|-------------|
| g Eisenbergiella  | g Malassezia                   | 0.038045399  | 0.304304886 | 0.670057703 |
| g Eisenbergiella  | g unclassified Fungi           | 0.007006191  | 0.850010817 | 0.948917865 |
| g Eisenbergiella  | g Mycosphaerella               | -0.037218625 | 0.314941868 | 0.675048581 |
| g Eisenbergiella  | g Simplicillium                | 0.015940629  | 0.666994335 | 0.879421986 |
| g Eisenbergiella  | g unclassified Cordycipitaceae | 0.107087185  | 0.00374711  | 0.121489271 |
| g Eisenbergiella  | g unidentified                 | -0.021757929 | 0.556980638 | 0.823525096 |
| g UBA9502         | g Verticillium                 | 0.010135905  | 0.78440539  | 0.923685117 |
| g UBA9502         | g unclassified Tremellomycetes | 0.008111294  | 0.826701887 | 0.939989934 |
| g UBA9502         | g Candida                      | -0.043964939 | 0.23514068  | 0.619373537 |
| g UBA9502         | g Cladosporium                 | 0.025516445  | 0.490936587 | 0.785245012 |
| g UBA9502         | g Debaryomyces                 | 0.011856209  | 0.748953826 | 0.910387945 |
| g UBA9502         | g Aspergillus                  | -0.012417052 | 0.73750562  | 0.907794719 |
| g UBA9502         | g Kazachstania                 | 0.037481721  | 0.311530831 | 0.672399691 |
| g UBA9502         | g Malassezia                   | -0.023437313 | 0.526944339 | 0.808837394 |
| g UBA9502         | g unclassified Fungi           | -0.047371159 | 0.200791085 | 0.589559174 |
| g UBA9502         | g Mycosphaerella               | -0.040468197 | 0.274519253 | 0.652360821 |
| g UBA9502         | g Simplicillium                | 0.076863086  | 0.037740124 | 0.342509087 |
| g UBA9502         | g unclassified Cordycipitaceae | 0.002548571  | 0.945158423 | 0.980291673 |
| g UBA9502         | g unidentified                 | -0.042467664 | 0.251484482 | 0.632566861 |
| g COE1            | g Verticillium                 | 0.060025013  | 0.104892877 | 0.48522153  |
| g COE1            | g unclassified Tremellomycetes | -0.062039718 | 0.093716091 | 0.47288973  |
| g COE1            | g Candida                      | -0.084258271 | 0.022711941 | 0.283321191 |
| g COE1            | g Cladosporium                 | -0.003150271 | 0.932238837 | 0.976147969 |
| g COE1            | g Debaryomyces                 | -0.087469919 | 0.018009968 | 0.260248809 |
| g COE1            | g Aspergillus                  | 0.011317209  | 0.760008488 | 0.914014072 |
| g COE1            | g Kazachstania                 | -0.048208504 | 0.192936777 | 0.581782946 |
| g COE1            | g Malassezia                   | 0.037493724  | 0.311375797 | 0.672399691 |
| g COE1            | g unclassified Fungi           | 0.070837199  | 0.055574953 | 0.401541153 |
| g COE1            | g Mycosphaerella               | -0.043885673 | 0.235986652 | 0.619809073 |
| g COE1            | g Simplicillium                | 0.018101369  | 0.625118246 | 0.857309653 |
| g COE1            | g unclassified Cordycipitaceae | 0.060557789  | 0.101839302 | 0.480456307 |
| g COE1            | g unidentified                 | -3.87E-05    | 0.999166    | 0.999354878 |
| g MGYG-HGUT-00574 | g Verticillium                 | -0.001854802 | 0.960072568 | 0.985114701 |
| g MGYG-HGUT-00574 | g unclassified Tremellomycetes | -0.017865037 | 0.629643201 | 0.859818244 |
| g MGYG-HGUT-00574 | g Candida                      | -0.030715346 | 0.406976729 | 0.738420989 |
| g MGYG-HGUT-00574 | g Cladosporium                 | -0.005562181 | 0.88066632  | 0.959750565 |
| g MGYG-HGUT-00574 | g Debaryomyces                 | -0.09075612  | 0.014102482 | 0.229942158 |
| g MGYG-HGUT-00574 | g Aspergillus                  | 0.034665054  | 0.349316002 | 0.701415926 |
| g MGYG-HGUT-00574 | g Kazachstania                 | -0.034209613 | 0.355687737 | 0.706489987 |
| g MGYG-HGUT-00574 | g Malassezia                   | -0.006009932 | 0.871137352 | 0.956362222 |
| g MGYG-HGUT-00574 | g unclassified Fungi           | 0.028193902  | 0.446582026 | 0.761832544 |
| g MGYG-HGUT-00574 | g Mycosphaerella               | -0.045477627 | 0.219405536 | 0.60663028  |
| g MGYG-HGUT-00574 | g Simplicillium                | -0.002284549 | 0.950832205 | 0.982492568 |
| g MGYG-HGUT-00574 | g unclassified Cordycipitaceae | 0.023017474  | 0.534375266 | 0.812123595 |
| g MGYG-HGUT-00574 | g unidentified                 | 0.030369305  | 0.412284979 | 0.742502435 |
| g Eubacterium G   | g Verticillium                 | 0.043543311  | 0.239665213 | 0.623263007 |
| g Eubacterium G   | g unclassified Tremellomycetes | -0.016818875 | 0.649838875 | 0.870052588 |
| g Eubacterium G   | g Candida                      | -0.12612567  | 0.000631102 | 0.046998384 |
| g Eubacterium G   | g Cladosporium                 | 0.039665472  | 0.284159515 | 0.658002559 |
| g Eubacterium G   | g Debaryomyces                 | -0.131782656 | 0.000353585 | 0.032535955 |
| g Eubacterium G   | g Aspergillus                  | -0.008204547 | 0.824741648 | 0.939308882 |
| g Eubacterium G   | g Kazachstania                 | -0.048148152 | 0.193495235 | 0.582538201 |
| g Eubacterium G   | g Malassezia                   | 0.015862513  | 0.66852885  | 0.880225493 |
| g Eubacterium G   | g unclassified Fungi           | 0.064092686  | 0.083328789 | 0.455684376 |
| g Eubacterium G   | g Mycosphaerella               | -0.050091515 | 0.176101468 | 0.571420949 |
| g Eubacterium G   | g Simplicillium                | 0.021933162  | 0.553808034 | 0.8206689   |
| g Eubacterium G   | g unclassified Cordycipitaceae | 0.0709447    | 0.055204095 | 0.400940701 |
| g Eubacterium G   | g unidentified                 | 0.058519038  | 0.113917562 | 0.497306733 |
| g Hungatella      | g Verticillium                 | 0.009565975  | 0.796253574 | 0.928889353 |
| g Hungatella      | g unclassified Tremellomycetes | 0.018420625  | 0.619027903 | 0.856010969 |
| g Hungatella      | g Candida                      | 0.022033776  | 0.551990424 | 0.820068828 |
| g Hungatella      | g Cladosporium                 | 0.047830866  | 0.196450676 | 0.585259306 |
| g Hungatella      | g Debaryomyces                 | 0.005248613  | 0.887344666 | 0.962165284 |
| g Hungatella      | g Aspergillus                  | -0.005449944 | 0.883053776 | 0.960970286 |
| g Hungatella      | g Kazachstania                 | 0.030231843  | 0.414404943 | 0.742882112 |
| g Hungatella      | g Malassezia                   | 0.015823421  | 0.669297297 | 0.880657424 |
| g Hungatella      | g unclassified Fungi           | -0.013105573 | 0.723530501 | 0.905975597 |
| g Hungatella      | g Mycosphaerella               | -0.032259868 | 0.383784473 | 0.724827288 |
| g Hungatella      | g Simplicillium                | -0.030721465 | 0.406883236 | 0.738420989 |
| g Hungatella      | g unclassified Cordycipitaceae | 0.026532071  | 0.473839221 | 0.775466538 |
| g Hungatella      | g unidentified                 | -0.052434248 | 0.156712977 | 0.554071089 |
| g CAG-56          | g Verticillium                 | 0.024359442  | 0.510809974 | 0.799135489 |
| g CAG-56          | g unclassified Tremellomycetes | 0.011910534  | 0.747842449 | 0.910244784 |
| g CAG-56          | g Candida                      | -0.040688288 | 0.271915487 | 0.649235037 |
| g CAG-56          | g Cladosporium                 | 0.031382614  | 0.396856498 | 0.732625333 |
| g CAG-56          | g Debaryomyces                 | -0.08142641  | 0.027706605 | 0.306773283 |
| g CAG-56          | g Aspergillus                  | 0.054191659  | 0.143262591 | 0.538440191 |
| g CAG-56          | g Kazachstania                 | -0.022377702 | 0.545799474 | 0.816281885 |



|                   |                                |              |             |             |
|-------------------|--------------------------------|--------------|-------------|-------------|
| g CAG-56          | g Malassezia                   | 0.010616783  | 0.774446996 | 0.918950225 |
| g CAG-56          | g unclassified Fungi           | 0.047617462  | 0.198456966 | 0.58591995  |
| g CAG-56          | g Mycosphaerella               | -0.003342623 | 0.928112286 | 0.974599406 |
| g CAG-56          | g Simplicillium                | 0.038457147  | 0.299097329 | 0.66688747  |
| g CAG-56          | g unclassified Cordycipitaceae | 0.046459046  | 0.209608874 | 0.598807697 |
| g CAG-56          | g unidentified                 | 0.001932454  | 0.958402459 | 0.984847119 |
| g UBA7182         | g Verticillium                 | 0.020088431  | 0.587641903 | 0.841465036 |
| g UBA7182         | g unclassified Tremellomycetes | -0.04225906  | 0.253822824 | 0.634509259 |
| g UBA7182         | g Candida                      | -0.003409483 | 0.926678383 | 0.974172444 |
| g UBA7182         | g Cladosporium                 | 0.032721631  | 0.377010637 | 0.720869551 |
| g UBA7182         | g Debaryomyces                 | -0.082858622 | 0.02507346  | 0.293923185 |
| g UBA7182         | g Aspergillus                  | 0.020232545  | 0.584964675 | 0.839904503 |
| g UBA7182         | g Kazachstania                 | -0.042504678 | 0.251071143 | 0.632257147 |
| g UBA7182         | g Malassezia                   | -0.043953791 | 0.235259529 | 0.619373537 |
| g UBA7182         | g unclassified Fungi           | 0.017505588  | 0.636552089 | 0.863367624 |
| g UBA7182         | g Mycosphaerella               | -0.01866316  | 0.614418495 | 0.853048096 |
| g UBA7182         | g Simplicillium                | 0.018527756  | 0.616990008 | 0.854691486 |
| g UBA7182         | g unclassified Cordycipitaceae | 0.008134809  | 0.826207486 | 0.939796584 |
| g UBA7182         | g unidentified                 | 0.031754271  | 0.391285986 | 0.729890405 |
| g CAG-303         | g Verticillium                 | 0.053361406  | 0.149502512 | 0.54599626  |
| g CAG-303         | g unclassified Tremellomycetes | -0.019024087 | 0.607587137 | 0.851136759 |
| g CAG-303         | g Candida                      | -0.059700549 | 0.106787775 | 0.487777626 |
| g CAG-303         | g Cladosporium                 | -0.011422702 | 0.757840932 | 0.912444277 |
| g CAG-303         | g Debaryomyces                 | -0.085566392 | 0.02068171  | 0.276330623 |
| g CAG-303         | g Aspergillus                  | 0.002819781  | 0.939333077 | 0.978000513 |
| g CAG-303         | g Kazachstania                 | -0.037781711 | 0.307671239 | 0.670833121 |
| g CAG-303         | g Malassezia                   | 0.001462589  | 0.968510585 | 0.988629248 |
| g CAG-303         | g unclassified Fungi           | 0.057806364  | 0.118395779 | 0.502487018 |
| g CAG-303         | g Mycosphaerella               | -0.033156067 | 0.370705318 | 0.717542285 |
| g CAG-303         | g Simplicillium                | -0.007020952 | 0.849698571 | 0.948917865 |
| g CAG-303         | g unclassified Cordycipitaceae | 0.023623365  | 0.52366823  | 0.806147397 |
| g CAG-303         | g unidentified                 | 0.036284526  | 0.327249586 | 0.682858146 |
| g UBA4285         | g Verticillium                 | 0.035128019  | 0.342913625 | 0.695270538 |
| g UBA4285         | g unclassified Tremellomycetes | 0.007955363  | 0.829982072 | 0.940630371 |
| g UBA4285         | g Candida                      | -0.038303865 | 0.301028979 | 0.667386268 |
| g UBA4285         | g Cladosporium                 | -0.022941401 | 0.535727348 | 0.813119162 |
| g UBA4285         | g Debaryomyces                 | -0.079020248 | 0.032666678 | 0.325586982 |
| g UBA4285         | g Aspergillus                  | 0.014414703  | 0.697214196 | 0.895302916 |
| g UBA4285         | g Kazachstania                 | -0.024185915 | 0.51382635  | 0.801136059 |
| g UBA4285         | g Malassezia                   | 0.023684794  | 0.522588851 | 0.805852786 |
| g UBA4285         | g unclassified Fungi           | 0.023186695  | 0.531373805 | 0.811448513 |
| g UBA4285         | g Mycosphaerella               | -0.039041926 | 0.291803951 | 0.660859538 |
| g UBA4285         | g Simplicillium                | 0.008211605  | 0.824593318 | 0.939308882 |
| g UBA4285         | g unclassified Cordycipitaceae | 0.052023787  | 0.159987908 | 0.557138085 |
| g UBA4285         | g unidentified                 | 0.037403788  | 0.312538693 | 0.672824117 |
| g MGYG-HGUT-00141 | g Verticillium                 | 0.054785783  | 0.138921163 | 0.533018036 |
| g MGYG-HGUT-00141 | g unclassified Tremellomycetes | -0.038863199 | 0.294020265 | 0.662829664 |
| g MGYG-HGUT-00141 | g Candida                      | -0.059287467 | 0.109239273 | 0.492300296 |
| g MGYG-HGUT-00141 | g Cladosporium                 | 0.013032912  | 0.72500108  | 0.906744053 |
| g MGYG-HGUT-00141 | g Debaryomyces                 | -0.062805882 | 0.089724488 | 0.467376042 |
| g MGYG-HGUT-00141 | g Aspergillus                  | -0.001144084 | 0.975365498 | 0.990490577 |
| g MGYG-HGUT-00141 | g Kazachstania                 | -0.042486974 | 0.251268793 | 0.632257147 |
| g MGYG-HGUT-00141 | g Malassezia                   | -0.011159064 | 0.763261388 | 0.915034792 |
| g MGYG-HGUT-00141 | g unclassified Fungi           | 0.048525582  | 0.190022152 | 0.580115304 |
| g MGYG-HGUT-00141 | g Mycosphaerella               | -0.035004689 | 0.344611806 | 0.696679266 |
| g MGYG-HGUT-00141 | g Simplicillium                | -0.004114112 | 0.911581925 | 0.970068376 |
| g MGYG-HGUT-00141 | g unclassified Cordycipitaceae | 0.048783172  | 0.187678288 | 0.577701512 |
| g MGYG-HGUT-00141 | g unidentified                 | 0.020668857  | 0.576893973 | 0.836262521 |
| g GCA-900066755   | g Verticillium                 | 0.072393999  | 0.050402107 | 0.386038256 |
| g GCA-900066755   | g unclassified Tremellomycetes | -0.002432527 | 0.947651862 | 0.981218396 |
| g GCA-900066755   | g Candida                      | -0.041870988 | 0.258213001 | 0.637519826 |
| g GCA-900066755   | g Cladosporium                 | 0.031710642  | 0.391937452 | 0.730055982 |
| g GCA-900066755   | g Debaryomyces                 | -0.11066965  | 0.002733093 | 0.100422189 |
| g GCA-900066755   | g Aspergillus                  | -0.027782008 | 0.453253629 | 0.765162867 |
| g GCA-900066755   | g Kazachstania                 | -0.012631658 | 0.733140154 | 0.907315107 |
| g GCA-900066755   | g Malassezia                   | 0.083003401  | 0.024819728 | 0.29312763  |
| g GCA-900066755   | g unclassified Fungi           | 0.034112808  | 0.357051441 | 0.707682778 |
| g GCA-900066755   | g Mycosphaerella               | -0.041004189 | 0.268207827 | 0.645333158 |
| g GCA-900066755   | g Simplicillium                | 0.017546854  | 0.635757305 | 0.862953283 |
| g GCA-900066755   | g unclassified Cordycipitaceae | 0.091212717  | 0.013623386 | 0.225653879 |
| g GCA-900066755   | g unidentified                 | 0.001968914  | 0.957618361 | 0.984847119 |
| g CAG-95          | g Verticillium                 | 0.09466116   | 0.010445334 | 0.197027668 |
| g CAG-95          | g unclassified Tremellomycetes | -0.051701154 | 0.162598141 | 0.560460432 |
| g CAG-95          | g Candida                      | -0.057603665 | 0.119694323 | 0.503129929 |
| g CAG-95          | g Cladosporium                 | -0.004940362 | 0.893920656 | 0.964392857 |
| g CAG-95          | g Debaryomyces                 | -0.101626063 | 0.005957966 | 0.148686802 |
| g CAG-95          | g Aspergillus                  | 0.061320613  | 0.097590644 | 0.477597322 |
| g CAG-95          | g Kazachstania                 | -0.062167707 | 0.09303957  | 0.471954484 |

|                    |                                |              |             |             |
|--------------------|--------------------------------|--------------|-------------|-------------|
| g CAG-95           | g Malassezia                   | 0.060299391  | 0.103311356 | 0.483295494 |
| g CAG-95           | g unclassified Fungi           | 0.070820928  | 0.055631263 | 0.401541153 |
| g CAG-95           | g Mycosphaerella               | -0.005079436 | 0.890952824 | 0.963128254 |
| g CAG-95           | g Simplicillium                | 0.040835115  | 0.27018788  | 0.648110713 |
| g CAG-95           | g unclassified Cordycipitaceae | 0.097654994  | 0.008239416 | 0.17418732  |
| g CAG-95           | g unidentified                 | 0.009792816  | 0.791532027 | 0.926752811 |
| g Fusicatenibacter | g Verticillium                 | -0.029467286 | 0.426313012 | 0.749727648 |
| g Fusicatenibacter | g unclassified Tremellomycetes | 0.076065973  | 0.039777066 | 0.350298383 |
| g Fusicatenibacter | g Candida                      | -0.042873494 | 0.246978408 | 0.629733759 |
| g Fusicatenibacter | g Cladosporium                 | 0.071113777  | 0.054624976 | 0.399257624 |
| g Fusicatenibacter | g Debaryomyces                 | -0.092799363 | 0.012068258 | 0.21499378  |
| g Fusicatenibacter | g Aspergillus                  | -0.029668796 | 0.423155298 | 0.746980426 |
| g Fusicatenibacter | g Kazachstania                 | -0.028031177 | 0.449211046 | 0.762723397 |
| g Fusicatenibacter | g Malassezia                   | -0.006578736 | 0.859063125 | 0.952294782 |
| g Fusicatenibacter | g unclassified Fungi           | -0.0083846   | 0.820959883 | 0.937561364 |
| g Fusicatenibacter | g Mycosphaerella               | -0.082667624 | 0.025411623 | 0.296062815 |
| g Fusicatenibacter | g Simplicillium                | 0.035742833  | 0.334527793 | 0.690008638 |
| g Fusicatenibacter | g unclassified Cordycipitaceae | 0.031513421  | 0.394890495 | 0.731058646 |
| g Fusicatenibacter | g unidentified                 | -0.003470257 | 0.925375189 | 0.974172444 |
| g Ruminococcus A   | g Verticillium                 | -0.046862013 | 0.205679313 | 0.595159554 |
| g Ruminococcus A   | g unclassified Tremellomycetes | 0.028284515  | 0.445121853 | 0.76170364  |
| g Ruminococcus A   | g Candida                      | -0.048501916 | 0.190238569 | 0.580290809 |
| g Ruminococcus A   | g Cladosporium                 | 0.039948438  | 0.280735482 | 0.657094722 |
| g Ruminococcus A   | g Debaryomyces                 | -0.088760369 | 0.016375034 | 0.250044164 |
| g Ruminococcus A   | g Aspergillus                  | 0.039332097  | 0.288229568 | 0.659568247 |
| g Ruminococcus A   | g Kazachstania                 | -0.07306169  | 0.048310286 | 0.378604998 |
| g Ruminococcus A   | g Malassezia                   | -0.009495169 | 0.797728896 | 0.929475004 |
| g Ruminococcus A   | g unclassified Fungi           | 0.00504738   | 0.891636774 | 0.963568245 |
| g Ruminococcus A   | g Mycosphaerella               | -0.042020732 | 0.256512798 | 0.63656207  |
| g Ruminococcus A   | g Simplicillium                | 0.006859771  | 0.853109427 | 0.949477689 |
| g Ruminococcus A   | g unclassified Cordycipitaceae | 0.022709122  | 0.539866341 | 0.815420595 |
| g Ruminococcus A   | g unidentified                 | 0.040236406  | 0.277279751 | 0.654270214 |
| g CAG-127          | g Verticillium                 | 0.020955654  | 0.571617609 | 0.832602552 |
| g CAG-127          | g unclassified Tremellomycetes | -0.050637484 | 0.171430823 | 0.565255978 |
| g CAG-127          | g Candida                      | -0.061749604 | 0.095264148 | 0.474839952 |
| g CAG-127          | g Cladosporium                 | -0.036739683 | 0.321213996 | 0.678324987 |
| g CAG-127          | g Debaryomyces                 | -0.142277466 | 0.000113467 | 0.018409489 |
| g CAG-127          | g Aspergillus                  | 0.023721544  | 0.52194365  | 0.805467412 |
| g CAG-127          | g Kazachstania                 | -0.040986212 | 0.268417875 | 0.645398308 |
| g CAG-127          | g Malassezia                   | 0.0266916    | 0.471183678 | 0.77381206  |
| g CAG-127          | g unclassified Fungi           | 0.087344716  | 0.018175941 | 0.260620329 |
| g CAG-127          | g Mycosphaerella               | -0.04133044  | 0.264415223 | 0.642342032 |
| g CAG-127          | g Simplicillium                | 0.007571297  | 0.838073854 | 0.944260809 |
| g CAG-127          | g unclassified Cordycipitaceae | -0.003837255 | 0.917510005 | 0.971437239 |
| g CAG-127          | g unidentified                 | 0.052410234  | 0.15690317  | 0.554071089 |
| g CAG-411          | g Verticillium                 | -0.019390157 | 0.60069318  | 0.847052968 |
| g CAG-411          | g unclassified Tremellomycetes | -0.088248235 | 0.01700762  | 0.254671396 |
| g CAG-411          | g Candida                      | 0.02979333   | 0.421210668 | 0.74604389  |
| g CAG-411          | g Cladosporium                 | -0.056177724 | 0.129146302 | 0.516899602 |
| g CAG-411          | g Debaryomyces                 | 0.012907304  | 0.727545642 | 0.907012052 |
| g CAG-411          | g Aspergillus                  | -0.015290449 | 0.679808337 | 0.886254999 |
| g CAG-411          | g Kazachstania                 | -0.018952997 | 0.60892999  | 0.851291399 |
| g CAG-411          | g Malassezia                   | 0.025258371  | 0.495333199 | 0.787975933 |
| g CAG-411          | g unclassified Fungi           | 0.002263858  | 0.951276952 | 0.982634054 |
| g CAG-411          | g Mycosphaerella               | 0.001225048  | 0.973622773 | 0.990490577 |
| g CAG-411          | g Simplicillium                | 0.038841221  | 0.294293582 | 0.663163264 |
| g CAG-411          | g unclassified Cordycipitaceae | -0.078483272 | 0.033871754 | 0.32913765  |
| g CAG-411          | g unidentified                 | 0.060887463  | 0.099985443 | 0.478320958 |
| g Anaerostipes     | g Verticillium                 | -0.061878905 | 0.094571686 | 0.473835105 |
| g Anaerostipes     | g unclassified Tremellomycetes | 0.024999268  | 0.499768355 | 0.791370491 |
| g Anaerostipes     | g Candida                      | 0.002474112  | 0.946758254 | 0.980691059 |
| g Anaerostipes     | g Cladosporium                 | -0.013163651 | 0.722355777 | 0.905687198 |
| g Anaerostipes     | g Debaryomyces                 | 0.006883583  | 0.852605362 | 0.949400054 |
| g Anaerostipes     | g Aspergillus                  | -0.038402637 | 0.299783306 | 0.667321362 |
| g Anaerostipes     | g Kazachstania                 | 0.007038692  | 0.849323339 | 0.948917865 |
| g Anaerostipes     | g Malassezia                   | -0.012566337 | 0.734467993 | 0.907315107 |
| g Anaerostipes     | g unclassified Fungi           | -0.020546414 | 0.579153569 | 0.836772676 |
| g Anaerostipes     | g Mycosphaerella               | -0.059110865 | 0.110300801 | 0.493323362 |
| g Anaerostipes     | g Simplicillium                | 0.031568998  | 0.394056969 | 0.730848211 |
| g Anaerostipes     | g unclassified Cordycipitaceae | 0.01947307   | 0.599136656 | 0.846523771 |
| g Anaerostipes     | g unidentified                 | 0.006675161  | 0.857019449 | 0.95172419  |
| g KLE1615          | g Verticillium                 | 0.032831005  | 0.375417016 | 0.719866895 |
| g KLE1615          | g unclassified Tremellomycetes | 0.028345446  | 0.444141506 | 0.761241564 |
| g KLE1615          | g Candida                      | -0.072187362 | 0.051064631 | 0.387359084 |
| g KLE1615          | g Cladosporium                 | 0.02884291   | 0.436183827 | 0.755804366 |
| g KLE1615          | g Debaryomyces                 | -0.115143803 | 0.001819633 | 0.083377853 |
| g KLE1615          | g Aspergillus                  | 0.044954133  | 0.224763315 | 0.612060698 |
| g KLE1615          | g Kazachstania                 | -0.028277121 | 0.445240889 | 0.76170364  |

|                   |                                |              |             |             |
|-------------------|--------------------------------|--------------|-------------|-------------|
| g KLE1615         | g Malassezia                   | 0.050035477  | 0.176586171 | 0.572147844 |
| g KLE1615         | g unclassified Fungi           | 0.114755535  | 0.001886076 | 0.084840998 |
| g KLE1615         | g Mycosphaerella               | -0.010249618 | 0.782047292 | 0.922260522 |
| g KLE1615         | g Simplicillium                | 0.040234606  | 0.277301258 | 0.654270214 |
| g KLE1615         | g unclassified Cordycipitaceae | 0.018160571  | 0.623986912 | 0.8570016   |
| g KLE1615         | g unidentified                 | 0.096937334  | 0.008726439 | 0.179655997 |
| g MGYG-HGUT-00202 | g Verticillium                 | 0.01280172   | 0.729686884 | 0.907197641 |
| g MGYG-HGUT-00202 | g unclassified Tremellomycetes | -0.006643168 | 0.857697428 | 0.952106527 |
| g MGYG-HGUT-00202 | g Candida                      | -0.033315488 | 0.368407993 | 0.71614358  |
| g MGYG-HGUT-00202 | g Cladosporium                 | 0.023945507  | 0.518020542 | 0.803768376 |
| g MGYG-HGUT-00202 | g Debaryomyces                 | -0.124075209 | 0.000774135 | 0.051090495 |
| g MGYG-HGUT-00202 | g Aspergillus                  | 0.036617739  | 0.32282387  | 0.679419688 |
| g MGYG-HGUT-00202 | g Kazachstania                 | -0.027497133 | 0.457900517 | 0.767141961 |
| g MGYG-HGUT-00202 | g Malassezia                   | 0.010103194  | 0.7850841   | 0.924111229 |
| g MGYG-HGUT-00202 | g unclassified Fungi           | 0.022754583  | 0.539055024 | 0.815013611 |
| g MGYG-HGUT-00202 | g Mycosphaerella               | -0.044244182 | 0.232177523 | 0.617559003 |
| g MGYG-HGUT-00202 | g Simplicillium                | -0.036591252 | 0.323174242 | 0.679677603 |
| g MGYG-HGUT-00202 | g unclassified Cordycipitaceae | 0.017742629  | 0.631992397 | 0.860602695 |
| g MGYG-HGUT-00202 | g unidentified                 | 0.01777607   | 0.631350252 | 0.860229872 |
| g MGYG-HGUT-00164 | g Verticillium                 | -0.032684552 | 0.377551842 | 0.721295105 |
| g MGYG-HGUT-00164 | g unclassified Tremellomycetes | 0.021456721  | 0.562454568 | 0.827219568 |
| g MGYG-HGUT-00164 | g Candida                      | -0.064922836 | 0.079401986 | 0.45101344  |
| g MGYG-HGUT-00164 | g Cladosporium                 | 0.050471858  | 0.172837828 | 0.56685821  |
| g MGYG-HGUT-00164 | g Debaryomyces                 | -0.018297716 | 0.621369532 | 0.856123107 |
| g MGYG-HGUT-00164 | g Aspergillus                  | 0.038572729  | 0.297646247 | 0.666037764 |
| g MGYG-HGUT-00164 | g Kazachstania                 | -0.002452279 | 0.947227412 | 0.980874888 |
| g MGYG-HGUT-00164 | g Malassezia                   | -0.022716195 | 0.539740067 | 0.815420595 |
| g MGYG-HGUT-00164 | g unclassified Fungi           | -0.00806828  | 0.827606431 | 0.939989934 |
| g MGYG-HGUT-00164 | g Mycosphaerella               | -0.03172961  | 0.391654146 | 0.730055982 |
| g MGYG-HGUT-00164 | g Simplicillium                | -0.012671286 | 0.73233497  | 0.907315107 |
| g MGYG-HGUT-00164 | g unclassified Cordycipitaceae | 0.019223145  | 0.603834034 | 0.848913478 |
| g MGYG-HGUT-00164 | g unidentified                 | -0.038520415 | 0.298302436 | 0.666157944 |
| g CAG-45          | g Verticillium                 | 0.087488855  | 0.017984982 | 0.260248809 |
| g CAG-45          | g unclassified Tremellomycetes | -0.07939095  | 0.031856296 | 0.322599522 |
| g CAG-45          | g Candida                      | -0.070493085 | 0.056776034 | 0.404854444 |
| g CAG-45          | g Cladosporium                 | 0.00615178   | 0.868123363 | 0.95523359  |
| g CAG-45          | g Debaryomyces                 | -0.090800305 | 0.014055479 | 0.229529448 |
| g CAG-45          | g Aspergillus                  | 0.027956354  | 0.450422849 | 0.76389846  |
| g CAG-45          | g Kazachstania                 | -0.027746785 | 0.453826744 | 0.765539151 |
| g CAG-45          | g Malassezia                   | 0.063841429  | 0.084547767 | 0.458565103 |
| g CAG-45          | g unclassified Fungi           | 0.056233732  | 0.128764439 | 0.516130793 |
| g CAG-45          | g Mycosphaerella               | -0.013752417 | 0.710484475 | 0.902091837 |
| g CAG-45          | g Simplicillium                | 0.039992711  | 0.280202298 | 0.657094722 |
| g CAG-45          | g unclassified Cordycipitaceae | 0.074976287  | 0.042711663 | 0.360139301 |
| g CAG-45          | g unidentified                 | 0.083521193  | 0.023930341 | 0.287933808 |
| g Eubacterium E   | g Verticillium                 | -0.01848943  | 0.617718727 | 0.855029374 |
| g Eubacterium E   | g unclassified Tremellomycetes | 0.025810127  | 0.485958918 | 0.782411275 |
| g Eubacterium E   | g Candida                      | -0.048717812 | 0.188270981 | 0.578311618 |
| g Eubacterium E   | g Cladosporium                 | -0.010492496 | 0.77701736  | 0.920449091 |
| g Eubacterium E   | g Debaryomyces                 | -0.057649526 | 0.119399558 | 0.502959311 |
| g Eubacterium E   | g Aspergillus                  | 0.076782653  | 0.037941564 | 0.343160371 |
| g Eubacterium E   | g Kazachstania                 | -0.042625422 | 0.249726084 | 0.631737101 |
| g Eubacterium E   | g Malassezia                   | -0.002125729 | 0.954246427 | 0.983140463 |
| g Eubacterium E   | g unclassified Fungi           | 0.021501775  | 0.561634129 | 0.82716943  |
| g Eubacterium E   | g Mycosphaerella               | -0.069941081 | 0.058747702 | 0.410342032 |
| g Eubacterium E   | g Simplicillium                | 0.095886246  | 0.009486092 | 0.187629577 |
| g Eubacterium E   | g unclassified Cordycipitaceae | -0.002884783 | 0.937937353 | 0.977568509 |
| g Eubacterium E   | g unidentified                 | 0.045757368  | 0.216580286 | 0.60423216  |
| g UBA5416         | g Verticillium                 | 0.001499943  | 0.967706777 | 0.988549475 |
| g UBA5416         | g unclassified Tremellomycetes | 0.029110237  | 0.431941631 | 0.753388221 |
| g UBA5416         | g Candida                      | 0.009336163  | 0.801044566 | 0.930555602 |
| g UBA5416         | g Cladosporium                 | 0.039113739  | 0.290916587 | 0.660476148 |
| g UBA5416         | g Debaryomyces                 | 0.011862562  | 0.748823824 | 0.910387945 |
| g UBA5416         | g Aspergillus                  | -0.063375211 | 0.086847752 | 0.463850116 |
| g UBA5416         | g Kazachstania                 | 0.008773128  | 0.812813671 | 0.934142805 |
| g UBA5416         | g Malassezia                   | 0.014801497  | 0.689506194 | 0.891576094 |
| g UBA5416         | g unclassified Fungi           | -0.049335006 | 0.182728835 | 0.575260034 |
| g UBA5416         | g Mycosphaerella               | 0.009381989  | 0.800088608 | 0.929951672 |
| g UBA5416         | g Simplicillium                | 0.001256312  | 0.972949872 | 0.990262148 |
| g UBA5416         | g unclassified Cordycipitaceae | 0.039304698  | 0.288565809 | 0.659613931 |
| g UBA5416         | g unidentified                 | -0.074345344 | 0.044492882 | 0.366970906 |
| g GCA-900066575   | g Verticillium                 | 0.07261575   | 0.049699134 | 0.384441693 |
| g GCA-900066575   | g unclassified Tremellomycetes | -0.023572533 | 0.524562284 | 0.8071702   |
| g GCA-900066575   | g Candida                      | -0.086319676 | 0.019585765 | 0.270166111 |
| g GCA-900066575   | g Cladosporium                 | 0.000253485  | 0.994541111 | 0.997274144 |
| g GCA-900066575   | g Debaryomyces                 | -0.124905368 | 0.000712946 | 0.048724197 |
| g GCA-900066575   | g Aspergillus                  | 0.036566955  | 0.323495858 | 0.679956003 |
| g GCA-900066575   | g Kazachstania                 | -0.030945817 | 0.403464018 | 0.736936858 |

|                   |                                |              |             |             |
|-------------------|--------------------------------|--------------|-------------|-------------|
| g GCA-900066575   | g Malassezia                   | 0.027057427  | 0.465125077 | 0.77119373  |
| g GCA-900066575   | g unclassified Fungi           | 0.0647722    | 0.080103162 | 0.45101344  |
| g GCA-900066575   | g Mycosphaerella               | -0.012556743 | 0.734663082 | 0.907315107 |
| g GCA-900066575   | g Simplicillium                | 0.00316485   | 0.931926004 | 0.976058688 |
| g GCA-900066575   | g unclassified Cordycipitaceae | 0.048439853  | 0.190806975 | 0.580402598 |
| g GCA-900066575   | g unidentified                 | 0.006125429  | 0.868683133 | 0.955273867 |
| g CHH4-2          | g Verticillium                 | 0.015767126  | 0.670404518 | 0.881269642 |
| g CHH4-2          | g unclassified Tremellomycetes | -0.003428439 | 0.926271894 | 0.974172444 |
| g CHH4-2          | g Candida                      | -0.014518306 | 0.695146499 | 0.894923341 |
| g CHH4-2          | g Cladosporium                 | 0.01008187   | 0.785526624 | 0.924142374 |
| g CHH4-2          | g Debaryomyces                 | -0.008760505 | 0.813078014 | 0.934264151 |
| g CHH4-2          | g Aspergillus                  | 0.066668619  | 0.071633546 | 0.44209897  |
| g CHH4-2          | g Kazachstania                 | 0.015271002  | 0.680193037 | 0.886538086 |
| g CHH4-2          | g Malassezia                   | 0.038908858  | 0.293453005 | 0.662256281 |
| g CHH4-2          | g unclassified Fungi           | 0.013814266  | 0.709241418 | 0.901741281 |
| g CHH4-2          | g Mycosphaerella               | 0.017071848  | 0.644931035 | 0.867835734 |
| g CHH4-2          | g Simplicillium                | -0.054496012 | 0.141025798 | 0.535462861 |
| g CHH4-2          | g unclassified Cordycipitaceae | 0.038377803  | 0.300096178 | 0.667386268 |
| g CHH4-2          | g unidentified                 | -0.054101742 | 0.143928596 | 0.538704729 |
| g GCA-900066135   | g Verticillium                 | 0.006291112  | 0.865164699 | 0.954571392 |
| g GCA-900066135   | g unclassified Tremellomycetes | 0.016785586  | 0.650485845 | 0.870550299 |
| g GCA-900066135   | g Candida                      | -0.045573088 | 0.218438479 | 0.60636786  |
| g GCA-900066135   | g Cladosporium                 | -0.008836381 | 0.811489338 | 0.934113162 |
| g GCA-900066135   | g Debaryomyces                 | -0.126390446 | 0.000614536 | 0.046450134 |
| g GCA-900066135   | g Aspergillus                  | 0.049413205  | 0.18203534  | 0.575010893 |
| g GCA-900066135   | g Kazachstania                 | -0.051371931 | 0.165294595 | 0.562434723 |
| g GCA-900066135   | g Malassezia                   | -0.018894855 | 0.610029252 | 0.851291399 |
| g GCA-900066135   | g unclassified Fungi           | 0.049196075  | 0.183965725 | 0.575925162 |
| g GCA-900066135   | g Mycosphaerella               | -0.045805295 | 0.216098882 | 0.603366323 |
| g GCA-900066135   | g Simplicillium                | 0.030551252  | 0.409488833 | 0.740596806 |
| g GCA-900066135   | g unclassified Cordycipitaceae | 0.037911583  | 0.306010176 | 0.670434717 |
| g GCA-900066135   | g unidentified                 | 0.057934798  | 0.117578723 | 0.502289277 |
| g Tyzzerella      | g Verticillium                 | -0.080920472 | 0.028692031 | 0.31117391  |
| g Tyzzerella      | g unclassified Tremellomycetes | 0.051612874  | 0.163317916 | 0.561148601 |
| g Tyzzerella      | g Candida                      | -0.024035041 | 0.516456448 | 0.802865612 |
| g Tyzzerella      | g Cladosporium                 | 0.040717904  | 0.271566411 | 0.649109772 |
| g Tyzzerella      | g Debaryomyces                 | 0.060769991  | 0.100642919 | 0.478858752 |
| g Tyzzerella      | g Aspergillus                  | -0.030862463 | 0.404732351 | 0.737438672 |
| g Tyzzerella      | g Kazachstania                 | 0.00444079   | 0.904593401 | 0.967483304 |
| g Tyzzerella      | g Malassezia                   | -0.052007695 | 0.16011735  | 0.557138085 |
| g Tyzzerella      | g unclassified Fungi           | -0.091369749 | 0.013461965 | 0.225046626 |
| g Tyzzerella      | g Mycosphaerella               | -0.03850692  | 0.298471873 | 0.666240589 |
| g Tyzzerella      | g Simplicillium                | -0.00939705  | 0.799774492 | 0.929905946 |
| g Tyzzerella      | g unclassified Cordycipitaceae | -0.012757208 | 0.730590216 | 0.907315107 |
| g Tyzzerella      | g unidentified                 | -0.042259591 | 0.253816852 | 0.634509259 |
| g UBA7096         | g Verticillium                 | 0.006984519  | 0.850469303 | 0.949231744 |
| g UBA7096         | g unclassified Tremellomycetes | 0.004839137  | 0.896081721 | 0.965025114 |
| g UBA7096         | g Candida                      | -0.050449226 | 0.173030761 | 0.567004826 |
| g UBA7096         | g Cladosporium                 | 0.037619003  | 0.309760666 | 0.672249255 |
| g UBA7096         | g Debaryomyces                 | -0.042390533 | 0.252347326 | 0.633802908 |
| g UBA7096         | g Aspergillus                  | -0.02880509  | 0.436785913 | 0.735981115 |
| g UBA7096         | g Kazachstania                 | -0.026178481 | 0.479754326 | 0.780189053 |
| g UBA7096         | g Malassezia                   | 0.008053839  | 0.827910183 | 0.939989934 |
| g UBA7096         | g unclassified Fungi           | -0.044374597 | 0.230802737 | 0.615978453 |
| g UBA7096         | g Mycosphaerella               | -0.095212071 | 0.010003797 | 0.193883107 |
| g UBA7096         | g Simplicillium                | 0.023027555  | 0.534196212 | 0.812066472 |
| g UBA7096         | g unclassified Cordycipitaceae | 0.04484929   | 0.225847467 | 0.612692296 |
| g UBA7096         | g unidentified                 | -0.059533371 | 0.107774629 | 0.489543137 |
| g CAG-632         | g Verticillium                 | 0.053706999  | 0.146880451 | 0.54128199  |
| g CAG-632         | g unclassified Tremellomycetes | -0.027327208 | 0.460684979 | 0.769075712 |
| g CAG-632         | g Candida                      | -0.046126262 | 0.212894711 | 0.600680647 |
| g CAG-632         | g Cladosporium                 | 0.005754181  | 0.876576219 | 0.957913373 |
| g CAG-632         | g Debaryomyces                 | -0.064287667 | 0.082392657 | 0.455217912 |
| g CAG-632         | g Aspergillus                  | -0.022947142 | 0.535625236 | 0.813080799 |
| g CAG-632         | g Kazachstania                 | -0.070308992 | 0.057427385 | 0.407303341 |
| g CAG-632         | g Malassezia                   | 0.037388624  | 0.312735047 | 0.672824117 |
| g CAG-632         | g unclassified Fungi           | 0.051314782  | 0.165766069 | 0.562504371 |
| g CAG-632         | g Mycosphaerella               | -0.073956289 | 0.04562209  | 0.370793362 |
| g CAG-632         | g Simplicillium                | -0.004040307 | 0.91316178  | 0.970799924 |
| g CAG-632         | g unclassified Cordycipitaceae | 0.090903821  | 0.013945904 | 0.22809205  |
| g CAG-632         | g unidentified                 | -0.019959698 | 0.590038163 | 0.842338356 |
| g MGYG-HGUT-00378 | g Verticillium                 | -0.004868839 | 0.895447529 | 0.96495896  |
| g MGYG-HGUT-00378 | g unclassified Tremellomycetes | -0.058658116 | 0.113059362 | 0.496223213 |
| g MGYG-HGUT-00378 | g Candida                      | -0.051150718 | 0.167125188 | 0.562908051 |
| g MGYG-HGUT-00378 | g Cladosporium                 | 0.0281373    | 0.447495502 | 0.762502994 |
| g MGYG-HGUT-00378 | g Debaryomyces                 | -0.135087288 | 0.000249368 | 0.027068677 |
| g MGYG-HGUT-00378 | g Aspergillus                  | 0.052974712  | 0.152478486 | 0.549189615 |
| g MGYG-HGUT-00378 | g Kazachstania                 | -0.056501282 | 0.126952369 | 0.513928833 |



|                   |                                |              |             |             |
|-------------------|--------------------------------|--------------|-------------|-------------|
| g MGYG-HGUT-00378 | g Malassezia                   | 0.010696256  | 0.772804731 | 0.918101184 |
| g MGYG-HGUT-00378 | g unclassified Fungi           | 0.0210262    | 0.570323251 | 0.831953372 |
| g MGYG-HGUT-00378 | g Mycosphaerella               | 0.010353442  | 0.779895994 | 0.921371303 |
| g MGYG-HGUT-00378 | g Simplicillium                | -0.059426567 | 0.108408853 | 0.490260184 |
| g MGYG-HGUT-00378 | g unclassified Cordycipitaceae | 0.027826676  | 0.452527413 | 0.765081497 |
| g MGYG-HGUT-00378 | g unidentified                 | 0.044005541  | 0.234708191 | 0.619063328 |
| g MGYG-HGUT-03970 | g Verticillium                 | 0.083527681  | 0.023919376 | 0.287933808 |
| g MGYG-HGUT-03970 | g unclassified Tremellomycetes | -0.050196414 | 0.175196807 | 0.570357274 |
| g MGYG-HGUT-03970 | g Candida                      | -0.047480691 | 0.199750637 | 0.587155901 |
| g MGYG-HGUT-03970 | g Cladosporium                 | 0.016701649  | 0.652118319 | 0.871852944 |
| g MGYG-HGUT-03970 | g Debaryomyces                 | -0.142165952 | 0.000114895 | 0.018409489 |
| g MGYG-HGUT-03970 | g Aspergillus                  | 0.027189437  | 0.462949476 | 0.769075712 |
| g MGYG-HGUT-03970 | g Kazachstania                 | -0.055947466 | 0.130725413 | 0.517833494 |
| g MGYG-HGUT-03970 | g Malassezia                   | 0.067497571  | 0.068168715 | 0.435341789 |
| g MGYG-HGUT-03970 | g unclassified Fungi           | 0.000552656  | 0.988098717 | 0.995185646 |
| g MGYG-HGUT-03970 | g Mycosphaerella               | -0.02345294  | 0.526668767 | 0.808779782 |
| g MGYG-HGUT-03970 | g Simplicillium                | -0.027403165 | 0.459439146 | 0.768514023 |
| g MGYG-HGUT-03970 | g unclassified Cordycipitaceae | 0.110420045  | 0.002794665 | 0.101233889 |
| g MGYG-HGUT-03970 | g unidentified                 | 0.003531679  | 0.924058334 | 0.974172444 |
| g Marvinbryantia  | g Verticillium                 | 0.014214412  | 0.701217923 | 0.897212331 |
| g Marvinbryantia  | g unclassified Tremellomycetes | -0.021016299 | 0.570504832 | 0.831953372 |
| g Marvinbryantia  | g Candida                      | -0.079005559 | 0.032699149 | 0.325586982 |
| g Marvinbryantia  | g Cladosporium                 | -0.002150675 | 0.953710089 | 0.983054781 |
| g Marvinbryantia  | g Debaryomyces                 | -0.120711381 | 0.001075268 | 0.062177529 |
| g Marvinbryantia  | g Aspergillus                  | 0.03948861   | 0.286313901 | 0.659056958 |
| g Marvinbryantia  | g Kazachstania                 | -0.046586742 | 0.208357811 | 0.597903264 |
| g Marvinbryantia  | g Malassezia                   | 0.007198497  | 0.845944674 | 0.947820248 |
| g Marvinbryantia  | g unclassified Fungi           | 0.014015413  | 0.705204053 | 0.988876088 |
| g Marvinbryantia  | g Mycosphaerella               | -0.05481836  | 0.138686074 | 0.532502188 |
| g Marvinbryantia  | g Simplicillium                | 0.047237968  | 0.202061584 | 0.591320708 |
| g Marvinbryantia  | g unclassified Cordycipitaceae | 0.049379878  | 0.182330654 | 0.575010893 |
| g Marvinbryantia  | g unidentified                 | 0.047854104  | 0.196233107 | 0.585259221 |
| g MGYG-HGUT-04169 | g Verticillium                 | -0.001660825 | 0.964245263 | 0.987117422 |
| g MGYG-HGUT-04169 | g unclassified Tremellomycetes | -0.037742873 | 0.308169126 | 0.670997057 |
| g MGYG-HGUT-04169 | g Candida                      | -0.036585402 | 0.323251653 | 0.679677603 |
| g MGYG-HGUT-04169 | g Cladosporium                 | -0.013255631 | 0.720496711 | 0.905336886 |
| g MGYG-HGUT-04169 | g Debaryomyces                 | -0.021068572 | 0.569546503 | 0.831953372 |
| g MGYG-HGUT-04169 | g Aspergillus                  | -0.002402535 | 0.948296373 | 0.981693624 |
| g MGYG-HGUT-04169 | g Kazachstania                 | -0.044468025 | 0.229821399 | 0.615065767 |
| g MGYG-HGUT-04169 | g Malassezia                   | 0.017396487  | 0.63865538  | 0.86388896  |
| g MGYG-HGUT-04169 | g unclassified Fungi           | -0.011049947 | 0.765508265 | 0.916134753 |
| g MGYG-HGUT-04169 | g Mycosphaerella               | 0.059229645  | 0.109585939 | 0.492584069 |
| g MGYG-HGUT-04169 | g Simplicillium                | 0.031432999  | 0.396098521 | 0.732270187 |
| g MGYG-HGUT-04169 | g unclassified Cordycipitaceae | 0.009657571  | 0.794346153 | 0.927994148 |
| g MGYG-HGUT-04169 | g unidentified                 | 0.006583614  | 0.858959723 | 0.952294782 |
| g UBA7160         | g Verticillium                 | -0.003999011 | 0.914045909 | 0.971160503 |
| g UBA7160         | g unclassified Tremellomycetes | 0.016993188  | 0.646455449 | 0.868120757 |
| g UBA7160         | g Candida                      | -0.067313491 | 0.068926007 | 0.437275185 |
| g UBA7160         | g Cladosporium                 | -0.00937473  | 0.800240023 | 0.929951672 |
| g UBA7160         | g Debaryomyces                 | -0.103054324 | 0.005288063 | 0.140695631 |
| g UBA7160         | g Aspergillus                  | 0.069248644  | 0.061300859 | 0.415557779 |
| g UBA7160         | g Kazachstania                 | -0.077534697 | 0.036093297 | 0.337675685 |
| g UBA7160         | g Malassezia                   | 0.042554112  | 0.250519854 | 0.63194305  |
| g UBA7160         | g unclassified Fungi           | 0.036006713  | 0.330969387 | 0.686907235 |
| g UBA7160         | g Mycosphaerella               | -0.053961491 | 0.14497214  | 0.540332211 |
| g UBA7160         | g Simplicillium                | 0.048899442  | 0.186627318 | 0.5772845   |
| g UBA7160         | g unclassified Cordycipitaceae | 0.0191523    | 0.605168576 | 0.849782598 |
| g UBA7160         | g unidentified                 | 0.064031905  | 0.083622359 | 0.456836242 |
| g CAG-882         | g Verticillium                 | 0.045510197  | 0.219075244 | 0.60663028  |
| g CAG-882         | g unclassified Tremellomycetes | -0.053163013 | 0.151023759 | 0.547949889 |
| g CAG-882         | g Candida                      | -0.104165903 | 0.004814536 | 0.136588245 |
| g CAG-882         | g Cladosporium                 | -0.0097657   | 0.792096027 | 0.926965257 |
| g CAG-882         | g Debaryomyces                 | -0.07575409  | 0.040599012 | 0.352435391 |
| g CAG-882         | g Aspergillus                  | 0.015183642  | 0.681922306 | 0.887198957 |
| g CAG-882         | g Kazachstania                 | -0.055308893 | 0.135182994 | 0.524661199 |
| g CAG-882         | g Malassezia                   | 0.015177621  | 0.682041534 | 0.887198957 |
| g CAG-882         | g unclassified Fungi           | 0.079373618  | 0.031893799 | 0.322657918 |
| g CAG-882         | g Mycosphaerella               | -0.044747835 | 0.226900123 | 0.612967811 |
| g CAG-882         | g Simplicillium                | 0.013249458  | 0.720621417 | 0.905336886 |
| g CAG-882         | g unclassified Cordycipitaceae | 0.051664856  | 0.162893795 | 0.560736054 |
| g CAG-882         | g unidentified                 | 0.037325052  | 0.313559114 | 0.673448862 |
| g Butyrivibrio A  | g Verticillium                 | 0.103947844  | 0.004904292 | 0.138141091 |
| g Butyrivibrio A  | g unclassified Tremellomycetes | -0.031092006 | 0.401245301 | 0.735790931 |
| g Butyrivibrio A  | g Candida                      | -0.09944592  | 0.007128265 | 0.161523119 |
| g Butyrivibrio A  | g Cladosporium                 | -0.022414299 | 0.545142723 | 0.816215242 |
| g Butyrivibrio A  | g Debaryomyces                 | -0.068434632 | 0.06441885  | 0.423004068 |
| g Butyrivibrio A  | g Aspergillus                  | -0.031596378 | 0.39364673  | 0.730757316 |
| g Butyrivibrio A  | g Kazachstania                 | -0.033867457 | 0.360522404 | 0.711747526 |

|                       |                                |              |             |             |
|-----------------------|--------------------------------|--------------|-------------|-------------|
| g Butyrivibrio A      | g Malassezia                   | 0.059504653  | 0.107944874 | 0.489838272 |
| g Butyrivibrio A      | g unclassified Fungi           | 0.052326116  | 0.157570763 | 0.55423489  |
| g Butyrivibrio A      | g Mycosphaerella               | -0.057986692 | 0.11724984  | 0.501713631 |
| g Butyrivibrio A      | g Simplicillium                | 0.048327454  | 0.191839558 | 0.581297022 |
| g Butyrivibrio A      | g unclassified Cordycipitaceae | 0.100166046  | 0.006720714 | 0.155961825 |
| g Butyrivibrio A      | g unidentified                 | 0.024998234  | 0.499786097 | 0.791370491 |
| g CAG-590             | g Verticillium                 | 0.067502649  | 0.068147921 | 0.435341789 |
| g CAG-590             | g unclassified Tremellomycetes | -0.041680205 | 0.260390438 | 0.638638484 |
| g CAG-590             | g Candida                      | -0.056176943 | 0.12915163  | 0.516899602 |
| g CAG-590             | g Cladosporium                 | 0.008726376  | 0.813792855 | 0.934616452 |
| g CAG-590             | g Debaryomyces                 | -0.101842006 | 0.005852016 | 0.147442937 |
| g CAG-590             | g Aspergillus                  | -0.023452444 | 0.526677516 | 0.808779782 |
| g CAG-590             | g Kazachstania                 | -0.058839033 | 0.111950615 | 0.495063318 |
| g CAG-590             | g Malassezia                   | 0.048355755  | 0.191579178 | 0.581082855 |
| g CAG-590             | g unclassified Fungi           | 0.100284119  | 0.006655923 | 0.155255379 |
| g CAG-590             | g Mycosphaerella               | -0.051912294 | 0.160886331 | 0.537764638 |
| g CAG-590             | g Simplicillium                | 0.014413778  | 0.697232658 | 0.895302916 |
| g CAG-590             | g unclassified Cordycipitaceae | 0.089985902  | 0.014944331 | 0.236737897 |
| g CAG-590             | g unidentified                 | 0.010500112  | 0.776859774 | 0.920368352 |
| g UBA11774            | g Verticillium                 | 0.039548401  | 0.285584351 | 0.658908047 |
| g UBA11774            | g unclassified Tremellomycetes | -0.039237977 | 0.289385713 | 0.660061436 |
| g UBA11774            | g Candida                      | -0.04656341  | 0.20858599  | 0.597903264 |
| g UBA11774            | g Cladosporium                 | -0.012945535 | 0.72677084  | 0.907012052 |
| g UBA11774            | g Debaryomyces                 | -0.114504535 | 0.001930205 | 0.084840998 |
| g UBA11774            | g Aspergillus                  | 0.073664231  | 0.046485526 | 0.374986617 |
| g UBA11774            | g Kazachstania                 | 0.003636627  | 0.921808742 | 0.973663191 |
| g UBA11774            | g Malassezia                   | 0.048919687  | 0.186444772 | 0.577226032 |
| g UBA11774            | g unclassified Fungi           | 0.012433933  | 0.73716193  | 0.90779094  |
| g UBA11774            | g Mycosphaerella               | -0.027009    | 0.465924605 | 0.771663103 |
| g UBA11774            | g Simplicillium                | -0.04619897  | 0.21217366  | 0.600680647 |
| g UBA11774            | g unclassified Cordycipitaceae | 0.034150772  | 0.356516246 | 0.707284386 |
| g UBA11774            | g unidentified                 | 0.020352836  | 0.582734367 | 0.838636621 |
| g NK4A136             | g Verticillium                 | 0.030398889  | 0.411829567 | 0.742316502 |
| g NK4A136             | g unclassified Tremellomycetes | -0.037268244 | 0.31429669  | 0.674485414 |
| g NK4A136             | g Candida                      | -0.042904258 | 0.246639139 | 0.629733759 |
| g NK4A136             | g Cladosporium                 | -0.052895929 | 0.153090277 | 0.549712015 |
| g NK4A136             | g Debaryomyces                 | -0.020010592 | 0.589090263 | 0.842171463 |
| g NK4A136             | g Aspergillus                  | 0.024360148  | 0.510797729 | 0.799135489 |
| g NK4A136             | g Kazachstania                 | -0.041362564 | 0.264043795 | 0.642176842 |
| g NK4A136             | g Malassezia                   | 0.03165042   | 0.392837745 | 0.730757316 |
| g NK4A136             | g unclassified Fungi           | 0.043691796  | 0.238064867 | 0.622892944 |
| g NK4A136             | g Mycosphaerella               | -0.012687646 | 0.732002667 | 0.907315107 |
| g NK4A136             | g Simplicillium                | -0.02984597  | 0.420390251 | 0.74604389  |
| g NK4A136             | g unclassified Cordycipitaceae | 0.046684436  | 0.207404328 | 0.597418526 |
| g NK4A136             | g unidentified                 | 0.003397724  | 0.926930558 | 0.974172444 |
| g Bacteroides F       | g Verticillium                 | 0.073960823  | 0.045608794 | 0.370793362 |
| g Bacteroides F       | g unclassified Tremellomycetes | -0.037867689 | 0.306570917 | 0.670552593 |
| g Bacteroides F       | g Candida                      | -0.090598614 | 0.014271158 | 0.2305609   |
| g Bacteroides F       | g Cladosporium                 | 0.013833023  | 0.708864578 | 0.901395203 |
| g Bacteroides F       | g Debaryomyces                 | -0.079552291 | 0.031509001 | 0.320310572 |
| g Bacteroides F       | g Aspergillus                  | 0.000495376  | 0.98933215  | 0.995825436 |
| g Bacteroides F       | g Kazachstania                 | -0.052695143 | 0.154657912 | 0.552146547 |
| g Bacteroides F       | g Malassezia                   | 0.056978944  | 0.123766566 | 0.508632924 |
| g Bacteroides F       | g unclassified Fungi           | 0.048363751  | 0.19150566  | 0.581082855 |
| g Bacteroides F       | g Mycosphaerella               | -0.070810828 | 0.055666241 | 0.401541153 |
| g Bacteroides F       | g Simplicillium                | 0.013577926  | 0.713995603 | 0.902852832 |
| g Bacteroides F       | g unclassified Cordycipitaceae | 0.075362411  | 0.041651563 | 0.356023296 |
| g Bacteroides F       | g unidentified                 | -0.011664099 | 0.752888143 | 0.911258836 |
| g Lachnoclostridium A | g Verticillium                 | 0.035158834  | 0.342490163 | 0.695270538 |
| g Lachnoclostridium A | g unclassified Tremellomycetes | 0.027748414  | 0.453800233 | 0.765539151 |
| g Lachnoclostridium A | g Candida                      | -0.001200522 | 0.974150669 | 0.990490577 |
| g Lachnoclostridium A | g Cladosporium                 | 0.043171983  | 0.243700397 | 0.627821236 |
| g Lachnoclostridium A | g Debaryomyces                 | -0.029117269 | 0.431830361 | 0.753318313 |
| g Lachnoclostridium A | g Aspergillus                  | -0.024335873 | 0.511219125 | 0.799514213 |
| g Lachnoclostridium A | g Kazachstania                 | 0.049565352  | 0.180691651 | 0.575010893 |
| g Lachnoclostridium A | g Malassezia                   | 0.062469536  | 0.091459649 | 0.470392034 |
| g Lachnoclostridium A | g unclassified Fungi           | -0.064119182 | 0.083201075 | 0.45547531  |
| g Lachnoclostridium A | g Mycosphaerella               | -0.047163208 | 0.202777265 | 0.592595696 |
| g Lachnoclostridium A | g Simplicillium                | 0.028838349  | 0.43625641  | 0.755806374 |
| g Lachnoclostridium A | g unclassified Cordycipitaceae | 0.068252003  | 0.065136043 | 0.424688607 |
| g Lachnoclostridium A | g unidentified                 | -0.082166162 | 0.026318264 | 0.300469812 |
| g CAG-603             | g Verticillium                 | 0.072086358  | 0.051391112 | 0.388443393 |
| g CAG-603             | g unclassified Tremellomycetes | -0.042232164 | 0.254125413 | 0.634683766 |
| g CAG-603             | g Candida                      | -0.03986747  | 0.281712371 | 0.657094722 |
| g CAG-603             | g Cladosporium                 | -0.049614069 | 0.180262958 | 0.575003251 |
| g CAG-603             | g Debaryomyces                 | -0.05824659  | 0.115613563 | 0.498339196 |
| g CAG-603             | g Aspergillus                  | -0.030638963 | 0.40814494  | 0.739553039 |
| g CAG-603             | g Kazachstania                 | -0.015251841 | 0.680572194 | 0.886595465 |

|                   |                                |              |             |             |
|-------------------|--------------------------------|--------------|-------------|-------------|
| g CAG-603         | g Malassezia                   | 0.066542026  | 0.072175138 | 0.442158914 |
| g CAG-603         | g unclassified Fungi           | 0.068146915  | 0.0655517   | 0.42608605  |
| g CAG-603         | g Mycosphaerella               | -0.039710894 | 0.283607991 | 0.658002559 |
| g CAG-603         | g Simplicillium                | -0.000577115 | 0.987572035 | 0.995158517 |
| g CAG-603         | g unclassified Cordycipitaceae | 0.068710815  | 0.06334663  | 0.421138313 |
| g CAG-603         | g unidentified                 | 0.015703745  | 0.671651969 | 0.881704645 |
| g Lachnobacterium | g Verticillium                 | 0.041111676  | 0.266954215 | 0.644840157 |
| g Lachnobacterium | g unclassified Tremellomycetes | -0.050702364 | 0.170881999 | 0.565092623 |
| g Lachnobacterium | g Candida                      | -0.032357173 | 0.382350906 | 0.723410923 |
| g Lachnobacterium | g Cladosporium                 | -0.001465364 | 0.968450857 | 0.988629248 |
| g Lachnobacterium | g Debaryomyces                 | -0.055875963 | 0.131218817 | 0.518599019 |
| g Lachnobacterium | g Aspergillus                  | -0.025008752 | 0.499605649 | 0.791370491 |
| g Lachnobacterium | g Kazachstania                 | -0.031100654 | 0.401114277 | 0.735790931 |
| g Lachnobacterium | g Malassezia                   | 0.005315848  | 0.885911342 | 0.96210924  |
| g Lachnobacterium | g unclassified Fungi           | 0.067083652  | 0.069881213 | 0.439536772 |
| g Lachnobacterium | g Mycosphaerella               | -0.060466171 | 0.102359318 | 0.481407244 |
| g Lachnobacterium | g Simplicillium                | -0.009719344 | 0.793060473 | 0.927022902 |
| g Lachnobacterium | g unclassified Cordycipitaceae | 0.048068177  | 0.194237096 | 0.583593681 |
| g Lachnobacterium | g unidentified                 | 0.002958842  | 0.9363474   | 0.977345273 |
| g UBA2882         | g Verticillium                 | 0.063915247  | 0.084188151 | 0.45780011  |
| g UBA2882         | g unclassified Tremellomycetes | 0.004279681  | 0.908039085 | 0.968929071 |
| g UBA2882         | g Candida                      | -0.044721721 | 0.227171636 | 0.612967811 |
| g UBA2882         | g Cladosporium                 | -0.011039038 | 0.76573299  | 0.916212856 |
| g UBA2882         | g Debaryomyces                 | -0.044669822 | 0.227711926 | 0.612967811 |
| g UBA2882         | g Aspergillus                  | -0.025457089 | 0.49194592  | 0.785854011 |
| g UBA2882         | g Kazachstania                 | -0.03632821  | 0.326667141 | 0.68248602  |
| g UBA2882         | g Malassezia                   | 0.044098063  | 0.233724731 | 0.617739342 |
| g UBA2882         | g unclassified Fungi           | 0.040036069  | 0.2796808   | 0.656601603 |
| g UBA2882         | g Mycosphaerella               | -0.004222324 | 0.909266209 | 0.96911863  |
| g UBA2882         | g Simplicillium                | 0.00742021   | 0.84126181  | 0.945770831 |
| g UBA2882         | g unclassified Cordycipitaceae | 0.061394887  | 0.09718463  | 0.477459115 |
| g UBA2882         | g unidentified                 | 0.016397356  | 0.658050342 | 0.874757951 |
| g MGYG-HGUT-02276 | g Verticillium                 | 0.005740495  | 0.876867445 | 0.957972871 |
| g MGYG-HGUT-02276 | g unclassified Tremellomycetes | -0.008821264 | 0.811805781 | 0.934113162 |
| g MGYG-HGUT-02276 | g Candida                      | -0.065805687 | 0.075392043 | 0.444977361 |
| g MGYG-HGUT-02276 | g Cladosporium                 | 0.055872535  | 0.131242504 | 0.518599019 |
| g MGYG-HGUT-02276 | g Debaryomyces                 | -0.090635168 | 0.014231854 | 0.2305609   |
| g MGYG-HGUT-02276 | g Aspergillus                  | 0.062471941  | 0.091447147 | 0.470392034 |
| g MGYG-HGUT-02276 | g Kazachstania                 | -0.013238872 | 0.720835304 | 0.905336886 |
| g MGYG-HGUT-02276 | g Malassezia                   | 0.028481244  | 0.441961049 | 0.759179335 |
| g MGYG-HGUT-02276 | g unclassified Fungi           | 0.043444685  | 0.240732354 | 0.624217047 |
| g MGYG-HGUT-02276 | g Mycosphaerella               | -0.003205747 | 0.931048515 | 0.975963882 |
| g MGYG-HGUT-02276 | g Simplicillium                | 0.025015629  | 0.499487671 | 0.791370491 |
| g MGYG-HGUT-02276 | g unclassified Cordycipitaceae | 0.055454879  | 0.134153744 | 0.52297511  |
| g MGYG-HGUT-02276 | g unidentified                 | 0.04461367   | 0.228297519 | 0.613524642 |
| g MGYG-HGUT-03273 | g Verticillium                 | 0.008822599  | 0.811777849 | 0.934113162 |
| g MGYG-HGUT-03273 | g unclassified Tremellomycetes | -0.021958943 | 0.553342019 | 0.820471322 |
| g MGYG-HGUT-03273 | g Candida                      | -0.018387322 | 0.619661998 | 0.856123107 |
| g MGYG-HGUT-03273 | g Cladosporium                 | -0.00692068  | 0.85182018  | 0.949400054 |
| g MGYG-HGUT-03273 | g Debaryomyces                 | -0.008600427 | 0.816432229 | 0.935686771 |
| g MGYG-HGUT-03273 | g Aspergillus                  | -0.021976433 | 0.553025971 | 0.820367644 |
| g MGYG-HGUT-03273 | g Kazachstania                 | -0.0482317   | 0.192722446 | 0.581782946 |
| g MGYG-HGUT-03273 | g Malassezia                   | 0.049239692  | 0.183576744 | 0.575758478 |
| g MGYG-HGUT-03273 | g unclassified Fungi           | 0.059466859  | 0.108169242 | 0.490002963 |
| g MGYG-HGUT-03273 | g Mycosphaerella               | -0.049918353 | 0.177602435 | 0.57328909  |
| g MGYG-HGUT-03273 | g Simplicillium                | -0.025418592 | 0.492601158 | 0.786230083 |
| g MGYG-HGUT-03273 | g unclassified Cordycipitaceae | 0.005688872  | 0.877966035 | 0.958574313 |
| g MGYG-HGUT-03273 | g unidentified                 | 0.046976698  | 0.204570774 | 0.594053722 |
| g UBA2856         | g Verticillium                 | 0.030492586  | 0.41038917  | 0.741461192 |
| g UBA2856         | g unclassified Tremellomycetes | -0.065900336 | 0.074972109 | 0.444705637 |
| g UBA2856         | g Candida                      | 0.009652593  | 0.794449799 | 0.92801278  |
| g UBA2856         | g Cladosporium                 | -0.034893114 | 0.346152746 | 0.697400798 |
| g UBA2856         | g Debaryomyces                 | -0.049010689 | 0.185625826 | 0.576715352 |
| g UBA2856         | g Aspergillus                  | 0.060685988  | 0.101115183 | 0.478961891 |
| g UBA2856         | g Kazachstania                 | -0.037564595 | 0.310461429 | 0.672399691 |
| g UBA2856         | g Malassezia                   | 0.026334747  | 0.477135257 | 0.778886947 |
| g UBA2856         | g unclassified Fungi           | 0.009736994  | 0.792693226 | 0.927022902 |
| g UBA2856         | g Mycosphaerella               | 0.014032073  | 0.704870019 | 0.898763556 |
| g UBA2856         | g Simplicillium                | 0.014545861  | 0.694596938 | 0.894732172 |
| g UBA2856         | g unclassified Cordycipitaceae | 0.030607919  | 0.408620284 | 0.740034202 |
| g UBA2856         | g unidentified                 | 0.008848317  | 0.811239489 | 0.934113162 |
| g Acetivibrio A   | g Verticillium                 | 0.037764258  | 0.307894908 | 0.670952207 |
| g Acetivibrio A   | g unclassified Tremellomycetes | 0.00237617   | 0.948862981 | 0.981955991 |
| g Acetivibrio A   | g Candida                      | -0.066598922 | 0.07193131  | 0.442158914 |
| g Acetivibrio A   | g Cladosporium                 | 0.031673541  | 0.392491951 | 0.730654821 |
| g Acetivibrio A   | g Debaryomyces                 | -0.086208392 | 0.019744415 | 0.270879604 |
| g Acetivibrio A   | g Aspergillus                  | -0.034919508 | 0.345787824 | 0.697400798 |
| g Acetivibrio A   | g Kazachstania                 | -0.049311593 | 0.182936841 | 0.575286078 |

|                   |                                |              |             |             |
|-------------------|--------------------------------|--------------|-------------|-------------|
| g Acetivibrio A   | g Malassezia                   | 0.044690788  | 0.227493553 | 0.612967811 |
| g Acetivibrio A   | g unclassified Fungi           | 0.003903623  | 0.916088505 | 0.971437239 |
| g Acetivibrio A   | g Mycosphaerella               | -0.044864455 | 0.225690416 | 0.612568284 |
| g Acetivibrio A   | g Simplicillium                | 0.021058533  | 0.569730476 | 0.831953372 |
| g Acetivibrio A   | g unclassified Cordycipitaceae | 0.089416457  | 0.015594839 | 0.245072665 |
| g Acetivibrio A   | g unidentified                 | -0.003599865 | 0.92259667  | 0.973795648 |
| g MGYG-HGUT-03215 | g Verticillium                 | 0.028912849  | 0.435071659 | 0.754902482 |
| g MGYG-HGUT-03215 | g unclassified Tremellomycetes | 0.021680682  | 0.558381979 | 0.82456557  |
| g MGYG-HGUT-03215 | g Candida                      | -0.046338476 | 0.210795097 | 0.599632718 |
| g MGYG-HGUT-03215 | g Cladosporium                 | 0.016023026  | 0.665377228 | 0.879421986 |
| g MGYG-HGUT-03215 | g Debaryomyces                 | -0.076407715 | 0.038892652 | 0.345770459 |
| g MGYG-HGUT-03215 | g Aspergillus                  | 0.008100203  | 0.826935096 | 0.939989934 |
| g MGYG-HGUT-03215 | g Kazachstania                 | -0.003338476 | 0.928201225 | 0.974599406 |
| g MGYG-HGUT-03215 | g Malassezia                   | 0.030043409  | 0.417321454 | 0.744489993 |
| g MGYG-HGUT-03215 | g unclassified Fungi           | 0.049451579  | 0.18169574  | 0.575010893 |
| g MGYG-HGUT-03215 | g Mycosphaerella               | -0.027591982 | 0.456350381 | 0.766589995 |
| g MGYG-HGUT-03215 | g Simplicillium                | 0.007146792  | 0.847037528 | 0.948182609 |
| g MGYG-HGUT-03215 | g unclassified Cordycipitaceae | 0.056869532  | 0.124490739 | 0.509026663 |
| g MGYG-HGUT-03215 | g unidentified                 | -0.007736527 | 0.834590528 | 0.942443386 |
| g MGYG-HGUT-04039 | g Verticillium                 | 0.082286088  | 0.026098938 | 0.299909386 |
| g MGYG-HGUT-04039 | g unclassified Tremellomycetes | -0.020776432 | 0.574912172 | 0.83498773  |
| g MGYG-HGUT-04039 | g Candida                      | -0.062868113 | 0.089406365 | 0.467278702 |
| g MGYG-HGUT-04039 | g Cladosporium                 | 0.049833384  | 0.178342409 | 0.573729188 |
| g MGYG-HGUT-04039 | g Debaryomyces                 | -0.071653324 | 0.052810657 | 0.394662696 |
| g MGYG-HGUT-04039 | g Aspergillus                  | -0.026164492 | 0.479989167 | 0.780189053 |
| g MGYG-HGUT-04039 | g Kazachstania                 | -0.024370928 | 0.510610643 | 0.799135489 |
| g MGYG-HGUT-04039 | g Malassezia                   | 0.056792792  | 0.125000632 | 0.510338337 |
| g MGYG-HGUT-04039 | g unclassified Fungi           | 0.057928025  | 0.1176217   | 0.502289277 |
| g MGYG-HGUT-04039 | g Mycosphaerella               | -0.038472952 | 0.298898622 | 0.666725383 |
| g MGYG-HGUT-04039 | g Simplicillium                | 0.029791142  | 0.421244778 | 0.74604389  |
| g MGYG-HGUT-04039 | g unclassified Cordycipitaceae | 0.096714426  | 0.008882852 | 0.180264028 |
| g MGYG-HGUT-04039 | g unidentified                 | -0.009577908 | 0.79600502  | 0.928870963 |
| g Sellimonas      | g Verticillium                 | 0.008757882  | 0.813132946 | 0.934264151 |
| g Sellimonas      | g unclassified Tremellomycetes | -0.021518024 | 0.561338388 | 0.826964057 |
| g Sellimonas      | g Candida                      | -0.043929365 | 0.235520083 | 0.619373537 |
| g Sellimonas      | g Cladosporium                 | 0.033319636  | 0.368348336 | 0.71614358  |
| g Sellimonas      | g Debaryomyces                 | -0.026177658 | 0.479768134 | 0.780189053 |
| g Sellimonas      | g Aspergillus                  | -0.007710813 | 0.835132408 | 0.942615976 |
| g Sellimonas      | g Kazachstania                 | -0.004933707 | 0.894062711 | 0.964392857 |
| g Sellimonas      | g Malassezia                   | 0.037113366  | 0.316313387 | 0.675389075 |
| g Sellimonas      | g unclassified Fungi           | 0.016351996  | 0.658936449 | 0.875108622 |
| g Sellimonas      | g Mycosphaerella               | -0.056539271 | 0.12669669  | 0.5134831   |
| g Sellimonas      | g Simplicillium                | 0.011103696  | 0.764401236 | 0.915519623 |
| g Sellimonas      | g unclassified Cordycipitaceae | 0.065950101  | 0.074752085 | 0.444519981 |
| g Sellimonas      | g unidentified                 | -0.007943813 | 0.830225156 | 0.940630371 |
| g MGYG-HGUT-04548 | g Verticillium                 | 0.064428229  | 0.081723093 | 0.453483887 |
| g MGYG-HGUT-04548 | g unclassified Tremellomycetes | -0.022534733 | 0.542984256 | 0.816215242 |
| g MGYG-HGUT-04548 | g Candida                      | -0.03828929  | 0.30121308  | 0.667386268 |
| g MGYG-HGUT-04548 | g Cladosporium                 | -0.030989067 | 0.402806845 | 0.736936858 |
| g MGYG-HGUT-04548 | g Debaryomyces                 | -0.067706318 | 0.067318219 | 0.433573579 |
| g MGYG-HGUT-04548 | g Aspergillus                  | 0.006652321  | 0.857503458 | 0.952061861 |
| g MGYG-HGUT-04548 | g Kazachstania                 | -0.05509656  | 0.136690878 | 0.527990969 |
| g MGYG-HGUT-04548 | g Malassezia                   | 0.041719171  | 0.259944682 | 0.638398936 |
| g MGYG-HGUT-04548 | g unclassified Fungi           | 0.033860279  | 0.360624265 | 0.711747526 |
| g MGYG-HGUT-04548 | g Mycosphaerella               | -0.020211321 | 0.585358598 | 0.840014196 |
| g MGYG-HGUT-04548 | g Simplicillium                | 0.038518688  | 0.298324117 | 0.666157944 |
| g MGYG-HGUT-04548 | g unclassified Cordycipitaceae | 0.039209057  | 0.289741586 | 0.660061436 |
| g MGYG-HGUT-04548 | g unidentified                 | 0.007503725  | 0.839499309 | 0.944860848 |
| g V9D3004         | g Verticillium                 | -0.006337081 | 0.86418899  | 0.953959668 |
| g V9D3004         | g unclassified Tremellomycetes | -0.037963303 | 0.305350337 | 0.670057703 |
| g V9D3004         | g Candida                      | -0.021368096 | 0.56407009  | 0.828451033 |
| g V9D3004         | g Cladosporium                 | 0.031589705  | 0.393746683 | 0.730757316 |
| g V9D3004         | g Debaryomyces                 | -0.017387906 | 0.638820922 | 0.86388896  |
| g V9D3004         | g Aspergillus                  | -0.061824637 | 0.094861825 | 0.474174698 |
| g V9D3004         | g Kazachstania                 | 0.027743313  | 0.453883258 | 0.765539151 |
| g V9D3004         | g Malassezia                   | -0.04462938  | 0.228133577 | 0.6134967   |
| g V9D3004         | g unclassified Fungi           | 0.029627834  | 0.423796073 | 0.747684235 |
| g V9D3004         | g Mycosphaerella               | -0.101934615 | 0.0058071   | 0.146660459 |
| g V9D3004         | g Simplicillium                | -0.029184017 | 0.430775027 | 0.753212133 |
| g V9D3004         | g unclassified Cordycipitaceae | 0.037579348  | 0.310271307 | 0.672399691 |
| g V9D3004         | g unidentified                 | -0.025092849 | 0.498164065 | 0.79034065  |
| g CAG-791         | g Verticillium                 | 0.027803922  | 0.452897265 | 0.765162867 |
| g CAG-791         | g unclassified Tremellomycetes | -0.012915261 | 0.727384358 | 0.907012052 |
| g CAG-791         | g Candida                      | -0.041878825 | 0.258123822 | 0.637448375 |
| g CAG-791         | g Cladosporium                 | -0.008093927 | 0.82706708  | 0.939989934 |
| g CAG-791         | g Debaryomyces                 | -0.102115772 | 0.005720134 | 0.146208832 |
| g CAG-791         | g Aspergillus                  | 0.049025608  | 0.185491827 | 0.576715352 |
| g CAG-791         | g Kazachstania                 | -0.043026338 | 0.245296045 | 0.628611967 |



|                     |                                |              |             |             |
|---------------------|--------------------------------|--------------|-------------|-------------|
| g CAG-791           | g Malassezia                   | 0.031369615  | 0.397052191 | 0.732625333 |
| g CAG-791           | g unclassified Fungi           | 0.050048576  | 0.176472784 | 0.571955559 |
| g CAG-791           | g Mycosphaerella               | -0.034446096 | 0.352370208 | 0.704575929 |
| g CAG-791           | g Simplicillium                | 0.016566504  | 0.654750215 | 0.873165316 |
| g CAG-791           | g unclassified Cordycipitaceae | 0.054842694  | 0.138510668 | 0.532214921 |
| g CAG-791           | g unidentified                 | 0.026772293  | 0.469843557 | 0.773292204 |
| g Lachnoclostridium | g Verticillium                 | -0.014084108 | 0.703827106 | 0.898202899 |
| g Lachnoclostridium | g unclassified Tremellomycetes | -0.001389446 | 0.970084579 | 0.98896291  |
| g Lachnoclostridium | g Candida                      | -0.026576176 | 0.473104232 | 0.7751028   |
| g Lachnoclostridium | g Cladosporium                 | 0.049278109  | 0.183234638 | 0.57555087  |
| g Lachnoclostridium | g Debaryomyces                 | -0.000747253 | 0.983908627 | 0.993484837 |
| g Lachnoclostridium | g Aspergillus                  | -0.020579557 | 0.578541531 | 0.836772676 |
| g Lachnoclostridium | g Kazachstania                 | 0.062399222  | 0.091825774 | 0.470557067 |
| g Lachnoclostridium | g Malassezia                   | 0.062441326  | 0.091606398 | 0.470392034 |
| g Lachnoclostridium | g unclassified Fungi           | -0.081449204 | 0.027662904 | 0.306773283 |
| g Lachnoclostridium | g Mycosphaerella               | 0.006633092  | 0.857910975 | 0.952106527 |
| g Lachnoclostridium | g Simplicillium                | 0.007893338  | 0.831287684 | 0.94102335  |
| g Lachnoclostridium | g unclassified Cordycipitaceae | 0.058356809  | 0.114925071 | 0.498021764 |
| g Lachnoclostridium | g unidentified                 | 0.024459717  | 0.509071137 | 0.79866431  |
| g CAG-510           | g Verticillium                 | 0.092312898  | 0.012527473 | 0.219116895 |
| g CAG-510           | g unclassified Tremellomycetes | -0.013375324 | 0.718079949 | 0.903594675 |
| g CAG-510           | g Candida                      | -0.008736733 | 0.813575902 | 0.934541374 |
| g CAG-510           | g Cladosporium                 | 0.033178106  | 0.370387189 | 0.71718888  |
| g CAG-510           | g Debaryomyces                 | -0.059831168 | 0.106021719 | 0.486808137 |
| g CAG-510           | g Aspergillus                  | 0.001551033  | 0.96660747  | 0.988470889 |
| g CAG-510           | g Kazachstania                 | -0.01690396  | 0.648186468 | 0.869649303 |
| g CAG-510           | g Malassezia                   | 0.068045691  | 0.065954133 | 0.427651122 |
| g CAG-510           | g unclassified Fungi           | 0.040827192  | 0.270280909 | 0.648110713 |
| g CAG-510           | g Mycosphaerella               | -0.000343538 | 0.992601845 | 0.996941403 |
| g CAG-510           | g Simplicillium                | 0.053448341  | 0.148839588 | 0.544911018 |
| g CAG-510           | g unclassified Cordycipitaceae | 0.110999319  | 0.002653667 | 0.098452591 |
| g CAG-510           | g unidentified                 | -0.02288838  | 0.536670719 | 0.813500867 |
| g Stomatobaculum    | g Verticillium                 | -0.022477501 | 0.544009468 | 0.816215242 |
| g Stomatobaculum    | g unclassified Tremellomycetes | 0.009375728  | 0.800219198 | 0.929951672 |
| g Stomatobaculum    | g Candida                      | -0.004365791 | 0.906197203 | 0.968202781 |
| g Stomatobaculum    | g Cladosporium                 | 0.017996026  | 0.627133484 | 0.859071395 |
| g Stomatobaculum    | g Debaryomyces                 | -0.062927567 | 0.089103281 | 0.466088645 |
| g Stomatobaculum    | g Aspergillus                  | 0.00803989   | 0.828203581 | 0.939989934 |
| g Stomatobaculum    | g Kazachstania                 | -0.000398551 | 0.99141717  | 0.996691668 |
| g Stomatobaculum    | g Malassezia                   | 0.019585202  | 0.597034506 | 0.845758921 |
| g Stomatobaculum    | g unclassified Fungi           | -0.003427116 | 0.926300259 | 0.974172444 |
| g Stomatobaculum    | g Mycosphaerella               | -0.035116479 | 0.343072303 | 0.695270538 |
| g Stomatobaculum    | g Simplicillium                | 0.026205078  | 0.479308    | 0.780189053 |
| g Stomatobaculum    | g unclassified Cordycipitaceae | 0.022446367  | 0.54456758  | 0.816215242 |
| g Stomatobaculum    | g unidentified                 | -0.00214256  | 0.953884568 | 0.983054781 |
| g Murimonas         | g Verticillium                 | -0.028939644 | 0.43464599  | 0.754622456 |
| g Murimonas         | g unclassified Tremellomycetes | -0.01416096  | 0.702287823 | 0.897212331 |
| g Murimonas         | g Candida                      | -0.02246995  | 0.544144806 | 0.816215242 |
| g Murimonas         | g Cladosporium                 | 0.004855887  | 0.895724081 | 0.965025114 |
| g Murimonas         | g Debaryomyces                 | -0.046413911 | 0.210052369 | 0.598807697 |
| g Murimonas         | g Aspergillus                  | 0.06494975   | 0.079277233 | 0.45101344  |
| g Murimonas         | g Kazachstania                 | -0.038401596 | 0.299796424 | 0.667321362 |
| g Murimonas         | g Malassezia                   | 0.024732886  | 0.504349947 | 0.795147667 |
| g Murimonas         | g unclassified Fungi           | 0.010128755  | 0.784553719 | 0.923685117 |
| g Murimonas         | g Mycosphaerella               | -0.053850627 | 0.14580111  | 0.540957635 |
| g Murimonas         | g Simplicillium                | -0.034031341 | 0.35820161  | 0.70916547  |
| g Murimonas         | g unclassified Cordycipitaceae | 0.044107613  | 0.233623386 | 0.617739342 |
| g Murimonas         | g unidentified                 | 0.030952353  | 0.403364653 | 0.736936858 |
| g Robinioniella     | g Verticillium                 | -0.013663199 | 0.712278958 | 0.902091837 |
| g Robinioniella     | g unclassified Tremellomycetes | 0.043145114  | 0.243994223 | 0.627824375 |
| g Robinioniella     | g Candida                      | -0.054134989 | 0.143682062 | 0.538689764 |
| g Robinioniella     | g Cladosporium                 | 0.055086487  | 0.136762734 | 0.527990969 |
| g Robinioniella     | g Debaryomyces                 | -0.013048356 | 0.724688428 | 0.906744053 |
| g Robinioniella     | g Aspergillus                  | -0.005795939 | 0.875687774 | 0.957681689 |
| g Robinioniella     | g Kazachstania                 | -0.036641881 | 0.322504732 | 0.679153248 |
| g Robinioniella     | g Malassezia                   | 0.007504413  | 0.839484799 | 0.944860848 |
| g Robinioniella     | g unclassified Fungi           | -0.140844873 | 0.000133145 | 0.018928692 |
| g Robinioniella     | g Mycosphaerella               | -0.006550411 | 0.859663634 | 0.952644081 |
| g Robinioniella     | g Simplicillium                | 0.01386974   | 0.708127144 | 0.900865766 |
| g Robinioniella     | g unclassified Cordycipitaceae | 0.051367279  | 0.165332943 | 0.562434723 |
| g Robinioniella     | g unidentified                 | -0.002078502 | 0.95526185  | 0.983420654 |
| g MGYG-HGUT-03578   | g Verticillium                 | 0.051060857  | 0.167873138 | 0.563342385 |
| g MGYG-HGUT-03578   | g unclassified Tremellomycetes | -0.07502632  | 0.042573029 | 0.359256615 |
| g MGYG-HGUT-03578   | g Candida                      | -0.038604995 | 0.297242002 | 0.665940424 |
| g MGYG-HGUT-03578   | g Cladosporium                 | -0.006065756 | 0.869950968 | 0.955555444 |
| g MGYG-HGUT-03578   | g Debaryomyces                 | -0.155495498 | 2.41E-05    | 0.009462963 |
| g MGYG-HGUT-03578   | g Aspergillus                  | 0.046733043  | 0.206931113 | 0.596823395 |
| g MGYG-HGUT-03578   | g Kazachstania                 | -0.021237338 | 0.566457709 | 0.829654737 |

|                   |                                |              |             |             |
|-------------------|--------------------------------|--------------|-------------|-------------|
| g MGYG-HGUT-03578 | g Malassezia                   | 0.063609438  | 0.085686021 | 0.460970752 |
| g MGYG-HGUT-03578 | g unclassified Fungi           | -0.000424543 | 0.990857455 | 0.996574895 |
| g MGYG-HGUT-03578 | g Mycosphaerella               | -0.037958833 | 0.305407329 | 0.670057703 |
| g MGYG-HGUT-03578 | g Simplicillium                | -0.015931906 | 0.667165627 | 0.879421986 |
| g MGYG-HGUT-03578 | g unclassified Cordycipitaceae | 0.029712987  | 0.422464635 | 0.746980426 |
| g MGYG-HGUT-03578 | g unidentified                 | 0.060703195  | 0.101018299 | 0.478906569 |
| g MGYG-HGUT-03613 | g Verticillium                 | 0.079601627  | 0.031403452 | 0.320145788 |
| g MGYG-HGUT-03613 | g unclassified Tremellomycetes | -0.006088979 | 0.869457517 | 0.955405149 |
| g MGYG-HGUT-03613 | g Candida                      | -0.02581082  | 0.485947194 | 0.782411275 |
| g MGYG-HGUT-03613 | g Cladosporium                 | 0.012940071  | 0.726881559 | 0.907012052 |
| g MGYG-HGUT-03613 | g Debaryomyces                 | -0.021293207 | 0.565436959 | 0.829042676 |
| g MGYG-HGUT-03613 | g Aspergillus                  | -0.003873163 | 0.916740884 | 0.971437239 |
| g MGYG-HGUT-03613 | g Kazachstania                 | 0.060315691  | 0.103218002 | 0.483295494 |
| g MGYG-HGUT-03613 | g Malassezia                   | 0.081764928  | 0.027063652 | 0.30473778  |
| g MGYG-HGUT-03613 | g unclassified Fungi           | 0.018729421  | 0.613161835 | 0.852887587 |
| g MGYG-HGUT-03613 | g Mycosphaerella               | 0.031602671  | 0.393552476 | 0.730757316 |
| g MGYG-HGUT-03613 | g Simplicillium                | 0.049734129  | 0.1792097   | 0.574257008 |
| g MGYG-HGUT-03613 | g unclassified Cordycipitaceae | 0.077030036  | 0.037324908 | 0.341376127 |
| g MGYG-HGUT-03613 | g unidentified                 | -0.048940416 | 0.186257995 | 0.577169451 |
| g MGYG-HGUT-03427 | g Verticillium                 | 0.044600047  | 0.228439756 | 0.613524642 |
| g MGYG-HGUT-03427 | g unclassified Tremellomycetes | -0.041108255 | 0.266994052 | 0.644840157 |
| g MGYG-HGUT-03427 | g Candida                      | -0.049117632 | 0.184666826 | 0.576342405 |
| g MGYG-HGUT-03427 | g Cladosporium                 | 0.000121045  | 0.99739323  | 0.998643711 |
| g MGYG-HGUT-03427 | g Debaryomyces                 | -0.030702713 | 0.407169807 | 0.738420989 |
| g MGYG-HGUT-03427 | g Aspergillus                  | -0.019758436 | 0.593793458 | 0.8441015   |
| g MGYG-HGUT-03427 | g Kazachstania                 | -0.02394717  | 0.51799146  | 0.803768376 |
| g MGYG-HGUT-03427 | g Malassezia                   | 0.027954303  | 0.450456094 | 0.76389846  |
| g MGYG-HGUT-03427 | g unclassified Fungi           | 0.001948942  | 0.958047871 | 0.984847119 |
| g MGYG-HGUT-03427 | g Mycosphaerella               | -0.041152745 | 0.266476294 | 0.644684802 |
| g MGYG-HGUT-03427 | g Simplicillium                | -0.024076373 | 0.515735251 | 0.802695096 |
| g MGYG-HGUT-03427 | g unclassified Cordycipitaceae | 0.063421047  | 0.086619417 | 0.463635138 |
| g MGYG-HGUT-03427 | g unidentified                 | -0.036059061 | 0.33026639  | 0.686481819 |
| g Lactonifactor   | g Verticillium                 | -0.006946146 | 0.851281252 | 0.949400054 |
| g Lactonifactor   | g unclassified Tremellomycetes | 0.02670372   | 0.470982246 | 0.77381206  |
| g Lactonifactor   | g Candida                      | -0.043731132 | 0.237642183 | 0.622281234 |
| g Lactonifactor   | g Cladosporium                 | 0.017652697  | 0.633720685 | 0.861635763 |
| g Lactonifactor   | g Debaryomyces                 | -0.045256365 | 0.221658804 | 0.608297059 |
| g Lactonifactor   | g Aspergillus                  | 0.003403647  | 0.92680354  | 0.974172444 |
| g Lactonifactor   | g Kazachstania                 | 0.00051253   | 0.988962754 | 0.995548313 |
| g Lactonifactor   | g Malassezia                   | 0.029154896  | 0.431235265 | 0.753212133 |
| g Lactonifactor   | g unclassified Fungi           | -0.038756368 | 0.295350407 | 0.664130473 |
| g Lactonifactor   | g Mycosphaerella               | -0.064467723 | 0.081535761 | 0.452919383 |
| g Lactonifactor   | g Simplicillium                | 0.010003526  | 0.787153071 | 0.92510593  |
| g Lactonifactor   | g unclassified Cordycipitaceae | 0.007376449  | 0.84218567  | 0.945972695 |
| g Lactonifactor   | g unidentified                 | -0.032621283 | 0.378476403 | 0.721666439 |
| g SZUA-378        | g Verticillium                 | 0.091637803  | 0.013190312 | 0.222446588 |
| g SZUA-378        | g unclassified Tremellomycetes | 0.006100117  | 0.869220885 | 0.955357756 |
| g SZUA-378        | g Candida                      | -0.048295156 | 0.192137021 | 0.581297022 |
| g SZUA-378        | g Cladosporium                 | 0.046230254  | 0.211863957 | 0.600680647 |
| g SZUA-378        | g Debaryomyces                 | -0.111512995 | 0.002534097 | 0.095770755 |
| g SZUA-378        | g Aspergillus                  | 0.056359771  | 0.127908317 | 0.51521926  |
| g SZUA-378        | g Kazachstania                 | -0.026152152 | 0.480196379 | 0.780189053 |
| g SZUA-378        | g Malassezia                   | 0.072650374  | 0.049590116 | 0.383879007 |
| g SZUA-378        | g unclassified Fungi           | 0.059888478  | 0.105686982 | 0.486749242 |
| g SZUA-378        | g Mycosphaerella               | -0.018731287 | 0.613126452 | 0.852887587 |
| g SZUA-378        | g Simplicillium                | 0.032484099  | 0.380485871 | 0.722837319 |
| g SZUA-378        | g unclassified Cordycipitaceae | 0.114440565  | 0.001941601 | 0.084840998 |
| g SZUA-378        | g unidentified                 | 0.019417151  | 0.600186221 | 0.847048625 |
| g UBA9414         | g Verticillium                 | -0.012114918 | 0.743665892 | 0.909574751 |
| g UBA9414         | g unclassified Tremellomycetes | -0.012874704 | 0.728206541 | 0.907012052 |
| g UBA9414         | g Candida                      | -0.080397904 | 0.029741318 | 0.31335365  |
| g UBA9414         | g Cladosporium                 | 0.025230744  | 0.495805093 | 0.788489554 |
| g UBA9414         | g Debaryomyces                 | -0.002079621 | 0.955237789 | 0.983420654 |
| g UBA9414         | g Aspergillus                  | 0.011449162  | 0.757297554 | 0.912291885 |
| g UBA9414         | g Kazachstania                 | -0.057910473 | 0.117733131 | 0.502447147 |
| g UBA9414         | g Malassezia                   | 0.048296094  | 0.192128379 | 0.581297022 |
| g UBA9414         | g unclassified Fungi           | -0.05400347  | 0.14465919  | 0.53976853  |
| g UBA9414         | g Mycosphaerella               | -0.077438995 | 0.036324159 | 0.338067067 |
| g UBA9414         | g Simplicillium                | 0.021398344  | 0.563518446 | 0.828225754 |
| g UBA9414         | g unclassified Cordycipitaceae | 0.009620981  | 0.795107976 | 0.928371687 |
| g UBA9414         | g unidentified                 | 0.003140097  | 0.932457156 | 0.976183382 |
| g Oribacterium    | g Verticillium                 | -0.038204666 | 0.302283485 | 0.668551599 |
| g Oribacterium    | g unclassified Tremellomycetes | 0.019039519  | 0.607295796 | 0.850953934 |
| g Oribacterium    | g Candida                      | 0.004390184  | 0.905675537 | 0.967870989 |
| g Oribacterium    | g Cladosporium                 | -0.012033949 | 0.745319596 | 0.909574751 |
| g Oribacterium    | g Debaryomyces                 | -0.044042937 | 0.234310336 | 0.618719731 |
| g Oribacterium    | g Aspergillus                  | 0.019329871  | 0.601826082 | 0.847667191 |
| g Oribacterium    | g Kazachstania                 | -0.019104578 | 0.606068283 | 0.85020356  |

|                   |                                |              |             |             |
|-------------------|--------------------------------|--------------|-------------|-------------|
| g Oribacterium    | g Malassezia                   | 0.021049168  | 0.569902145 | 0.831953372 |
| g Oribacterium    | g unclassified Fungi           | 0.014330562  | 0.698895128 | 0.895581042 |
| g Oribacterium    | g Mycosphaerella               | -0.043128361 | 0.24417754  | 0.627919011 |
| g Oribacterium    | g Simplicillium                | -0.001380507 | 0.970276964 | 0.989063754 |
| g Oribacterium    | g unclassified Cordycipitaceae | -0.020317927 | 0.583381203 | 0.83909415  |
| g Oribacterium    | g unidentified                 | 0.016712761  | 0.651902109 | 0.87167401  |
| g UBA2821         | g Verticillium                 | 0.037861495  | 0.306650092 | 0.670587161 |
| g UBA2821         | g unclassified Tremellomycetes | -0.04195006  | 0.257314244 | 0.637382803 |
| g UBA2821         | g Candida                      | -0.049753383 | 0.179041213 | 0.574257008 |
| g UBA2821         | g Cladosporium                 | -0.001901293 | 0.95907263  | 0.984847119 |
| g UBA2821         | g Debaryomyces                 | -0.033380581 | 0.367472518 | 0.716103178 |
| g UBA2821         | g Aspergillus                  | -0.055979725 | 0.130503284 | 0.517804933 |
| g UBA2821         | g Kazachstania                 | -0.04236928  | 0.252585445 | 0.633802908 |
| g UBA2821         | g Malassezia                   | 0.034941688  | 0.345481367 | 0.697400798 |
| g UBA2821         | g unclassified Fungi           | 0.051506638  | 0.164187266 | 0.561723687 |
| g UBA2821         | g Mycosphaerella               | -0.042173099 | 0.254790789 | 0.635347198 |
| g UBA2821         | g Simplicillium                | -0.00246952  | 0.946856939 | 0.980691059 |
| g UBA2821         | g unclassified Cordycipitaceae | 0.047959902  | 0.195244779 | 0.584648627 |
| g UBA2821         | g unidentified                 | 0.007498665  | 0.839606076 | 0.944880516 |
| g MGYG-HGUT-04082 | g Verticillium                 | 0.060774253  | 0.100619005 | 0.478858752 |
| g MGYG-HGUT-04082 | g unclassified Tremellomycetes | -0.052405672 | 0.156939325 | 0.554071089 |
| g MGYG-HGUT-04082 | g Candida                      | -0.006191599 | 0.867277635 | 0.955196913 |
| g MGYG-HGUT-04082 | g Cladosporium                 | 0.045054147  | 0.223732564 | 0.610957608 |
| g MGYG-HGUT-04082 | g Debaryomyces                 | -0.084064894 | 0.023026275 | 0.284654251 |
| g MGYG-HGUT-04082 | g Aspergillus                  | 0.007593321  | 0.837609368 | 0.943982397 |
| g MGYG-HGUT-04082 | g Kazachstania                 | -0.015040883 | 0.684751747 | 0.888866903 |
| g MGYG-HGUT-04082 | g Malassezia                   | 0.050524158  | 0.172392609 | 0.566309615 |
| g MGYG-HGUT-04082 | g unclassified Fungi           | 0.039075558  | 0.291388149 | 0.660859538 |
| g MGYG-HGUT-04082 | g Mycosphaerella               | -0.019778251 | 0.593423239 | 0.843919462 |
| g MGYG-HGUT-04082 | g Simplicillium                | 0.009806771  | 0.791241816 | 0.926624392 |
| g MGYG-HGUT-04082 | g unclassified Cordycipitaceae | 0.0365842    | 0.323267565 | 0.679677603 |
| g MGYG-HGUT-04082 | g unidentified                 | -0.036423588 | 0.325397817 | 0.682100836 |
| g MGYG-HGUT-00387 | g Verticillium                 | 0.023499437  | 0.525849265 | 0.808232746 |
| g MGYG-HGUT-00387 | g unclassified Tremellomycetes | -0.048428382 | 0.190912166 | 0.580402598 |
| g MGYG-HGUT-00387 | g Candida                      | -0.077509502 | 0.036153954 | 0.337675685 |
| g MGYG-HGUT-00387 | g Cladosporium                 | -0.038012931 | 0.304718063 | 0.670057703 |
| g MGYG-HGUT-00387 | g Debaryomyces                 | -0.070842815 | 0.055555526 | 0.401541153 |
| g MGYG-HGUT-00387 | g Aspergillus                  | -0.035876984 | 0.332715704 | 0.68846257  |
| g MGYG-HGUT-00387 | g Kazachstania                 | -0.037694745 | 0.308786854 | 0.671651258 |
| g MGYG-HGUT-00387 | g Malassezia                   | 0.003042215  | 0.934557793 | 0.976793554 |
| g MGYG-HGUT-00387 | g unclassified Fungi           | 0.002899424  | 0.93762301  | 0.977568509 |
| g MGYG-HGUT-00387 | g Mycosphaerella               | -0.032447763 | 0.38101922  | 0.723098466 |
| g MGYG-HGUT-00387 | g Simplicillium                | 0.027057566  | 0.465122792 | 0.77119373  |
| g MGYG-HGUT-00387 | g unclassified Cordycipitaceae | 0.051250865  | 0.166294578 | 0.562541523 |
| g MGYG-HGUT-00387 | g unidentified                 | 0.014163227  | 0.702242418 | 0.897212331 |
| g MGYG-HGUT-01252 | g Verticillium                 | 0.009954408  | 0.788173235 | 0.925277255 |
| g MGYG-HGUT-01252 | g unclassified Tremellomycetes | -0.011181725 | 0.762795012 | 0.914927919 |
| g MGYG-HGUT-01252 | g Candida                      | -0.039231477 | 0.289465675 | 0.660061436 |
| g MGYG-HGUT-01252 | g Cladosporium                 | 0.053699086  | 0.146940094 | 0.54128199  |
| g MGYG-HGUT-01252 | g Debaryomyces                 | -0.103484474 | 0.005100055 | 0.138908586 |
| g MGYG-HGUT-01252 | g Aspergillus                  | 0.006430057  | 0.862216142 | 0.953015155 |
| g MGYG-HGUT-01252 | g Kazachstania                 | -0.048449082 | 0.190722371 | 0.580402598 |
| g MGYG-HGUT-01252 | g Malassezia                   | 0.049462675  | 0.181597635 | 0.575010893 |
| g MGYG-HGUT-01252 | g unclassified Fungi           | 0.017519982  | 0.636274811 | 0.863323509 |
| g MGYG-HGUT-01252 | g Mycosphaerella               | -0.02790969  | 0.451179524 | 0.764111513 |
| g MGYG-HGUT-01252 | g Simplicillium                | 0.036232738  | 0.327940936 | 0.683662526 |
| g MGYG-HGUT-01252 | g unclassified Cordycipitaceae | 0.084277715  | 0.022680542 | 0.283321191 |
| g MGYG-HGUT-01252 | g unidentified                 | 0.03984013   | 0.282042751 | 0.657094722 |
| g MGYG-HGUT-01247 | g Verticillium                 | 0.008676814  | 0.814831226 | 0.934895807 |
| g MGYG-HGUT-01247 | g unclassified Tremellomycetes | 0.005362168  | 0.884924108 | 0.961818704 |
| g MGYG-HGUT-01247 | g Candida                      | -0.027487834 | 0.45805265  | 0.767141961 |
| g MGYG-HGUT-01247 | g Cladosporium                 | 0.041790895  | 0.259125574 | 0.637986696 |
| g MGYG-HGUT-01247 | g Debaryomyces                 | -0.066983644 | 0.070300217 | 0.439536772 |
| g MGYG-HGUT-01247 | g Aspergillus                  | 0.010934602  | 0.767885515 | 0.916616044 |
| g MGYG-HGUT-01247 | g Kazachstania                 | -0.031382623 | 0.396856354 | 0.732625333 |
| g MGYG-HGUT-01247 | g Malassezia                   | 0.043790888  | 0.237001071 | 0.62148426  |
| g MGYG-HGUT-01247 | g unclassified Fungi           | -0.034318381 | 0.354159439 | 0.705518671 |
| g MGYG-HGUT-01247 | g Mycosphaerella               | -0.054359871 | 0.14202301  | 0.537119624 |
| g MGYG-HGUT-01247 | g Simplicillium                | 0.039241262  | 0.289345315 | 0.660061436 |
| g MGYG-HGUT-01247 | g unclassified Cordycipitaceae | 0.056523444  | 0.12680316  | 0.513521254 |
| g MGYG-HGUT-01247 | g unidentified                 | -0.040151793 | 0.278292131 | 0.655510097 |
| g MGYG-HGUT-02210 | g Verticillium                 | 0.042153719  | 0.255009371 | 0.635347198 |
| g MGYG-HGUT-02210 | g unclassified Tremellomycetes | -0.006052105 | 0.870241063 | 0.955774876 |
| g MGYG-HGUT-02210 | g Candida                      | -0.037476559 | 0.311597521 | 0.672399691 |
| g MGYG-HGUT-02210 | g Cladosporium                 | 0.028504058  | 0.441595333 | 0.75910048  |
| g MGYG-HGUT-02210 | g Debaryomyces                 | -0.105379391 | 0.004341599 | 0.1276189   |
| g MGYG-HGUT-02210 | g Aspergillus                  | 0.03933509   | 0.288192855 | 0.659568247 |
| g MGYG-HGUT-02210 | g Kazachstania                 | -0.011659558 | 0.75298122  | 0.911258836 |

|                       |                                |              |             |             |
|-----------------------|--------------------------------|--------------|-------------|-------------|
| g MGYG-HGUT-02210     | g Malassezia                   | 0.060254412  | 0.103569312 | 0.483414571 |
| g MGYG-HGUT-02210     | g unclassified Fungi           | 0.020586755  | 0.57840864  | 0.836772676 |
| g MGYG-HGUT-02210     | g Mycosphaerella               | -0.066953952 | 0.070425014 | 0.439536772 |
| g MGYG-HGUT-02210     | g Simplicillium                | -0.034230839 | 0.355389169 | 0.706372686 |
| g MGYG-HGUT-02210     | g unclassified Cordycipitaceae | 0.054440689  | 0.141430383 | 0.53603736  |
| g MGYG-HGUT-02210     | g unidentified                 | 0.037969995  | 0.305265024 | 0.670057703 |
| g MGYG-HGUT-02075     | g Verticillium                 | 0.067259749  | 0.069148394 | 0.438023791 |
| g MGYG-HGUT-02075     | g unclassified Tremellomycetes | -0.030522124 | 0.409935715 | 0.741021479 |
| g MGYG-HGUT-02075     | g Candida                      | -0.03818215  | 0.302568707 | 0.668709704 |
| g MGYG-HGUT-02075     | g Cladosporium                 | -0.015549808 | 0.674685455 | 0.883385485 |
| g MGYG-HGUT-02075     | g Debaryomyces                 | -0.148164968 | 5.79E-05    | 0.014243469 |
| g MGYG-HGUT-02075     | g Aspergillus                  | 0.0633754    | 0.086846807 | 0.463850116 |
| g MGYG-HGUT-02075     | g Kazachstania                 | -0.070188368 | 0.057857526 | 0.407963088 |
| g MGYG-HGUT-02075     | g Malassezia                   | 0.004547334  | 0.902315708 | 0.966636316 |
| g MGYG-HGUT-02075     | g unclassified Fungi           | 0.047939903  | 0.195431325 | 0.584691625 |
| g MGYG-HGUT-02075     | g Mycosphaerella               | -0.001019505 | 0.978047219 | 0.991604689 |
| g MGYG-HGUT-02075     | g Simplicillium                | 0.018310183  | 0.621131844 | 0.856123107 |
| g MGYG-HGUT-02075     | g unclassified Cordycipitaceae | 0.036636263  | 0.322578988 | 0.679172496 |
| g MGYG-HGUT-02075     | g unidentified                 | 0.011942829  | 0.747182014 | 0.90996433  |
| g Eubacterium J       | g Verticillium                 | 0.050697226  | 0.170925411 | 0.565092623 |
| g Eubacterium J       | g unclassified Tremellomycetes | -0.048124054 | 0.193718548 | 0.582802008 |
| g Eubacterium J       | g Candida                      | -0.07128878  | 0.054030898 | 0.397628223 |
| g Eubacterium J       | g Cladosporium                 | -0.011449198 | 0.757296809 | 0.912291885 |
| g Eubacterium J       | g Debaryomyces                 | -0.059755938 | 0.106462399 | 0.487277293 |
| g Eubacterium J       | g Aspergillus                  | 0.032011288  | 0.387461604 | 0.727203277 |
| g Eubacterium J       | g Kazachstania                 | -0.000126894 | 0.997267285 | 0.998643711 |
| g Eubacterium J       | g Malassezia                   | 0.021325368  | 0.564849765 | 0.829039606 |
| g Eubacterium J       | g unclassified Fungi           | 0.087455567  | 0.018028925 | 0.260248809 |
| g Eubacterium J       | g Mycosphaerella               | -0.063243861 | 0.087504476 | 0.465488609 |
| g Eubacterium J       | g Simplicillium                | 0.026383916  | 0.476312789 | 0.777950599 |
| g Eubacterium J       | g unclassified Cordycipitaceae | 0.04543515   | 0.21983684  | 0.607083027 |
| g Eubacterium J       | g unidentified                 | 0.011198491  | 0.762450009 | 0.914830399 |
| g Lachnoanaerobaculum | g Verticillium                 | -0.006138828 | 0.868398492 | 0.955273867 |
| g Lachnoanaerobaculum | g unclassified Tremellomycetes | -0.052478638 | 0.156361871 | 0.553559117 |
| g Lachnoanaerobaculum | g Candida                      | -0.039019999 | 0.292075246 | 0.660859538 |
| g Lachnoanaerobaculum | g Cladosporium                 | -0.017024493 | 0.64584859  | 0.868076943 |
| g Lachnoanaerobaculum | g Debaryomyces                 | 0.00733659   | 0.84302732  | 0.946626116 |
| g Lachnoanaerobaculum | g Aspergillus                  | 0.019099841  | 0.606157613 | 0.85020356  |
| g Lachnoanaerobaculum | g Kazachstania                 | -0.022909805 | 0.536289413 | 0.813415158 |
| g Lachnoanaerobaculum | g Malassezia                   | 0.025238569  | 0.495671406 | 0.788395434 |
| g Lachnoanaerobaculum | g unclassified Fungi           | 0.050831875  | 0.169790387 | 0.564474357 |
| g Lachnoanaerobaculum | g Mycosphaerella               | -0.020891767 | 0.572790979 | 0.833746781 |
| g Lachnoanaerobaculum | g Simplicillium                | 0.014880401  | 0.687937716 | 0.891035118 |
| g Lachnoanaerobaculum | g unclassified Cordycipitaceae | 0.039164616  | 0.290289021 | 0.660184488 |
| g Lachnoanaerobaculum | g unidentified                 | 0.008088862  | 0.827173584 | 0.939989934 |
| g CAG-194             | g Verticillium                 | 0.077913311  | 0.035192151 | 0.333913017 |
| g CAG-194             | g unclassified Tremellomycetes | -0.067074458 | 0.069919649 | 0.439536772 |
| g CAG-194             | g Candida                      | -0.093786637 | 0.011181823 | 0.204362777 |
| g CAG-194             | g Cladosporium                 | 0.012182209  | 0.74229246  | 0.909557528 |
| g CAG-194             | g Debaryomyces                 | -0.096701139 | 0.008892253 | 0.180264028 |
| g CAG-194             | g Aspergillus                  | 0.002654829  | 0.942875726 | 0.979243394 |
| g CAG-194             | g Kazachstania                 | -0.019449492 | 0.599579092 | 0.84692999  |
| g CAG-194             | g Malassezia                   | 0.049833643  | 0.178340152 | 0.573729188 |
| g CAG-194             | g unclassified Fungi           | 0.078385808  | 0.034094503 | 0.329231974 |
| g CAG-194             | g Mycosphaerella               | -0.048614541 | 0.189210279 | 0.579369719 |
| g CAG-194             | g Simplicillium                | 0.076879928  | 0.037698061 | 0.342509087 |
| g CAG-194             | g unclassified Cordycipitaceae | 0.084097141  | 0.022973597 | 0.284335207 |
| g CAG-194             | g unidentified                 | 0.042745498  | 0.248393458 | 0.631092334 |
| g MGYG-HGUT-00118     | g Verticillium                 | -0.02405456  | 0.516115804 | 0.802695096 |
| g MGYG-HGUT-00118     | g unclassified Tremellomycetes | 0.021572947  | 0.560339287 | 0.826390511 |
| g MGYG-HGUT-00118     | g Candida                      | -0.028347851 | 0.444102846 | 0.761241564 |
| g MGYG-HGUT-00118     | g Cladosporium                 | 0.044992313  | 0.22436943  | 0.612060698 |
| g MGYG-HGUT-00118     | g Debaryomyces                 | -0.039750863 | 0.283123286 | 0.657890287 |
| g MGYG-HGUT-00118     | g Aspergillus                  | 0.013670083  | 0.712140442 | 0.902091837 |
| g MGYG-HGUT-00118     | g Kazachstania                 | 0.048394166  | 0.191226197 | 0.580480671 |
| g MGYG-HGUT-00118     | g Malassezia                   | 0.024587589  | 0.506858263 | 0.796609852 |
| g MGYG-HGUT-00118     | g unclassified Fungi           | -0.019097013 | 0.606210955 | 0.85020356  |
| g MGYG-HGUT-00118     | g Mycosphaerella               | -0.006414444 | 0.862547378 | 0.953015155 |
| g MGYG-HGUT-00118     | g Simplicillium                | -0.002313673 | 0.950206198 | 0.982348232 |
| g MGYG-HGUT-00118     | g unclassified Cordycipitaceae | 0.056602893  | 0.126269387 | 0.512733176 |
| g MGYG-HGUT-00118     | g unidentified                 | -0.047987966 | 0.194983227 | 0.584501423 |
| g MGYG-HGUT-01199     | g Verticillium                 | 0.018499189  | 0.617533143 | 0.854939171 |
| g MGYG-HGUT-01199     | g unclassified Tremellomycetes | -0.025745376 | 0.487054041 | 0.783154405 |
| g MGYG-HGUT-01199     | g Candida                      | -0.012120373 | 0.743554524 | 0.909574751 |
| g MGYG-HGUT-01199     | g Cladosporium                 | -0.015507315 | 0.675523762 | 0.883717696 |
| g MGYG-HGUT-01199     | g Debaryomyces                 | -0.077191797 | 0.036926304 | 0.340172772 |
| g MGYG-HGUT-01199     | g Aspergillus                  | 0.022841349  | 0.537508216 | 0.813920136 |
| g MGYG-HGUT-01199     | g Kazachstania                 | -0.052544436 | 0.155842518 | 0.553069016 |



|                   |                                |              |             |             |
|-------------------|--------------------------------|--------------|-------------|-------------|
| g MGYG-HGUT-01199 | g Malassezia                   | 0.012094413  | 0.744084581 | 0.909574751 |
| g MGYG-HGUT-01199 | g unclassified Fungi           | 0.008511768  | 0.818291412 | 0.936487497 |
| g MGYG-HGUT-01199 | g Mycosphaerella               | -0.062599971 | 0.090783584 | 0.469307225 |
| g MGYG-HGUT-01199 | g Simplicillium                | 0.043076801  | 0.244742363 | 0.628403245 |
| g MGYG-HGUT-01199 | g unclassified Cordycipitaceae | 0.026619144  | 0.472388768 | 0.774530205 |
| g MGYG-HGUT-01199 | g unidentified                 | -0.004026894 | 0.913448919 | 0.970883534 |
| g NC2004          | g Verticillium                 | 0.051332385  | 0.165620737 | 0.562504371 |
| g NC2004          | g unclassified Tremellomycetes | -0.054960309 | 0.137665264 | 0.530187936 |
| g NC2004          | g Candida                      | -0.049876433 | 0.177967225 | 0.573729188 |
| g NC2004          | g Cladosporium                 | -0.017412414 | 0.638348153 | 0.86388896  |
| g NC2004          | g Debaryomyces                 | -0.072148951 | 0.051188583 | 0.388021194 |
| g NC2004          | g Aspergillus                  | 0.053160111  | 0.1510461   | 0.547949889 |
| g NC2004          | g Kazachstania                 | -0.066228025 | 0.073532949 | 0.443882299 |
| g NC2004          | g Malassezia                   | 0.053791844  | 0.146242122 | 0.541002079 |
| g NC2004          | g unclassified Fungi           | 0.051792526  | 0.161855671 | 0.559767285 |
| g NC2004          | g Mycosphaerella               | -0.04394267  | 0.235378139 | 0.619373537 |
| g NC2004          | g Simplicillium                | -0.008217333 | 0.824472949 | 0.939308882 |
| g NC2004          | g unclassified Cordycipitaceae | 0.064791153  | 0.080014666 | 0.45101344  |
| g NC2004          | g unidentified                 | 0.015294873  | 0.679720821 | 0.88625009  |
| g MGYG-HGUT-02949 | g Verticillium                 | -0.024775117 | 0.503622142 | 0.794724407 |
| g MGYG-HGUT-02949 | g unclassified Tremellomycetes | 0.044603182  | 0.228407017 | 0.613524642 |
| g MGYG-HGUT-02949 | g Candida                      | -0.059772141 | 0.106367366 | 0.487112562 |
| g MGYG-HGUT-02949 | g Cladosporium                 | 0.046038195  | 0.213770448 | 0.601307517 |
| g MGYG-HGUT-02949 | g Debaryomyces                 | 0.025492332  | 0.491346488 | 0.785412166 |
| g MGYG-HGUT-02949 | g Aspergillus                  | -0.022358343 | 0.546147047 | 0.816307334 |
| g MGYG-HGUT-02949 | g Kazachstania                 | 0.024640909  | 0.505937022 | 0.796344723 |
| g MGYG-HGUT-02949 | g Malassezia                   | 0.029290463  | 0.429095147 | 0.751274884 |
| g MGYG-HGUT-02949 | g unclassified Fungi           | -0.03280305  | 0.37582394  | 0.719943689 |
| g MGYG-HGUT-02949 | g Mycosphaerella               | -0.050256892 | 0.174676813 | 0.569927454 |
| g MGYG-HGUT-02949 | g Simplicillium                | 0.062200295  | 0.09286794  | 0.471954484 |
| g MGYG-HGUT-02949 | g unclassified Cordycipitaceae | 0.035436297  | 0.338692205 | 0.693255567 |
| g MGYG-HGUT-02949 | g unidentified                 | -0.059913651 | 0.105540215 | 0.486422715 |
| g MGYG-HGUT-02256 | g Verticillium                 | 0.071589505  | 0.053022603 | 0.395249564 |
| g MGYG-HGUT-02256 | g unclassified Tremellomycetes | -0.004954224 | 0.893624785 | 0.964392857 |
| g MGYG-HGUT-02256 | g Candida                      | -0.03656449  | 0.323528489 | 0.679956003 |
| g MGYG-HGUT-02256 | g Cladosporium                 | 0.010297471  | 0.781055544 | 0.921874185 |
| g MGYG-HGUT-02256 | g Debaryomyces                 | -0.079103745 | 0.032482627 | 0.325188715 |
| g MGYG-HGUT-02256 | g Aspergillus                  | 0.010128938  | 0.784549936 | 0.923685117 |
| g MGYG-HGUT-02256 | g Kazachstania                 | -0.062956843 | 0.088954344 | 0.465955266 |
| g MGYG-HGUT-02256 | g Malassezia                   | 0.030852407  | 0.404885533 | 0.737438672 |
| g MGYG-HGUT-02256 | g unclassified Fungi           | 0.04604815   | 0.213671326 | 0.601212885 |
| g MGYG-HGUT-02256 | g Mycosphaerella               | -0.057366064 | 0.121230606 | 0.505823928 |
| g MGYG-HGUT-02256 | g Simplicillium                | 0.022340004  | 0.546476392 | 0.816320324 |
| g MGYG-HGUT-02256 | g unclassified Cordycipitaceae | 0.082420269  | 0.025855413 | 0.299345707 |
| g MGYG-HGUT-02256 | g unidentified                 | -0.004318471 | 0.907209315 | 0.968708003 |
| g TWA4            | g Verticillium                 | 0.064926892  | 0.079383175 | 0.45101344  |
| g TWA4            | g unclassified Tremellomycetes | -0.056091996 | 0.129732489 | 0.517527876 |
| g TWA4            | g Candida                      | 0.006742974  | 0.855582777 | 0.950427981 |
| g TWA4            | g Cladosporium                 | 0.000606014  | 0.986949767 | 0.994846869 |
| g TWA4            | g Debaryomyces                 | -0.083149516 | 0.024565905 | 0.292156703 |
| g TWA4            | g Aspergillus                  | 0.003730007  | 0.919807667 | 0.972219143 |
| g TWA4            | g Kazachstania                 | -0.01369652  | 0.711608568 | 0.902091837 |
| g TWA4            | g Malassezia                   | 0.051648191  | 0.163029674 | 0.560736054 |
| g TWA4            | g unclassified Fungi           | 0.011691782  | 0.752320812 | 0.911011175 |
| g TWA4            | g Mycosphaerella               | 0.031286024  | 0.398311995 | 0.733542905 |
| g TWA4            | g Simplicillium                | 0.007742842  | 0.834457463 | 0.942443386 |
| g TWA4            | g unclassified Cordycipitaceae | 0.092450841  | 0.012395714 | 0.21883174  |
| g TWA4            | g unidentified                 | -0.003608122 | 0.922419687 | 0.973795648 |
| g MGYG-HGUT-03517 | g Verticillium                 | 0.008667446  | 0.815027517 | 0.934957602 |
| g MGYG-HGUT-03517 | g unclassified Tremellomycetes | -0.060923231 | 0.099785933 | 0.478320958 |
| g MGYG-HGUT-03517 | g Candida                      | -0.038804708 | 0.294748033 | 0.66362206  |
| g MGYG-HGUT-03517 | g Cladosporium                 | -0.015714937 | 0.671431619 | 0.881634123 |
| g MGYG-HGUT-03517 | g Debaryomyces                 | -0.07529514  | 0.041834642 | 0.357109759 |
| g MGYG-HGUT-03517 | g Aspergillus                  | -0.015217288 | 0.681256097 | 0.886955574 |
| g MGYG-HGUT-03517 | g Kazachstania                 | -0.005499493 | 0.881998281 | 0.960513102 |
| g MGYG-HGUT-03517 | g Malassezia                   | 0.013628703  | 0.712973235 | 0.902150278 |
| g MGYG-HGUT-03517 | g unclassified Fungi           | -0.000288664 | 0.993783533 | 0.997274144 |
| g MGYG-HGUT-03517 | g Mycosphaerella               | -0.03717352  | 0.315529104 | 0.675194937 |
| g MGYG-HGUT-03517 | g Simplicillium                | -0.028088307 | 0.448287041 | 0.762502994 |
| g MGYG-HGUT-03517 | g unclassified Cordycipitaceae | 0.068214913  | 0.065282497 | 0.424832637 |
| g MGYG-HGUT-03517 | g unidentified                 | -0.02129809  | 0.565347798 | 0.829042676 |
| g MGYG-HGUT-00346 | g Verticillium                 | 0.016681109  | 0.652518051 | 0.872275283 |
| g MGYG-HGUT-00346 | g unclassified Tremellomycetes | 0.049249431  | 0.183489969 | 0.575758478 |
| g MGYG-HGUT-00346 | g Candida                      | -0.047323287 | 0.201247055 | 0.590022167 |
| g MGYG-HGUT-00346 | g Cladosporium                 | 0.049966043  | 0.177188118 | 0.572778705 |
| g MGYG-HGUT-00346 | g Debaryomyces                 | -0.102421321 | 0.005576104 | 0.144269771 |
| g MGYG-HGUT-00346 | g Aspergillus                  | 0.035591573  | 0.336578591 | 0.691502927 |
| g MGYG-HGUT-00346 | g Kazachstania                 | -0.041657021 | 0.2606559   | 0.638638484 |

|                   |                                |              |             |             |
|-------------------|--------------------------------|--------------|-------------|-------------|
| g MGYG-HGUT-00346 | g Malassezia                   | 0.032115231  | 0.385921424 | 0.725883489 |
| g MGYG-HGUT-00346 | g unclassified Fungi           | 0.057319244  | 0.121535139 | 0.506172817 |
| g MGYG-HGUT-00346 | g Mycosphaerella               | -0.007077724 | 0.848497853 | 0.948732489 |
| g MGYG-HGUT-00346 | g Simplicillium                | 0.054542119  | 0.140689295 | 0.534952972 |
| g MGYG-HGUT-00346 | g unclassified Cordycipitaceae | 0.058380095  | 0.114780029 | 0.497912726 |
| g MGYG-HGUT-00346 | g unidentified                 | 0.040618535  | 0.272738853 | 0.650027599 |
| g UC5-1-2E3       | g Verticillium                 | 0.013058419  | 0.724484724 | 0.906744053 |
| g UC5-1-2E3       | g unclassified Tremellomycetes | -0.011439982 | 0.757486061 | 0.912291885 |
| g UC5-1-2E3       | g Candida                      | 0.011194454  | 0.762533067 | 0.914830399 |
| g UC5-1-2E3       | g Cladosporium                 | 0.045488312  | 0.219297145 | 0.60663028  |
| g UC5-1-2E3       | g Debaryomyces                 | -0.101452402 | 0.006044418 | 0.148686802 |
| g UC5-1-2E3       | g Aspergillus                  | 0.018895315  | 0.610020556 | 0.851291399 |
| g UC5-1-2E3       | g Kazachstania                 | -0.046167858 | 0.212481986 | 0.600680647 |
| g UC5-1-2E3       | g Malassezia                   | 0.045403822  | 0.220155319 | 0.607083027 |
| g UC5-1-2E3       | g unclassified Fungi           | -0.027489699 | 0.458022127 | 0.767141961 |
| g UC5-1-2E3       | g Mycosphaerella               | -0.055120767 | 0.136518318 | 0.527817624 |
| g UC5-1-2E3       | g Simplicillium                | 0.012380872  | 0.738242431 | 0.907794719 |
| g UC5-1-2E3       | g unclassified Cordycipitaceae | 0.033060357  | 0.372088787 | 0.717884076 |
| g UC5-1-2E3       | g unidentified                 | 0.003062329  | 0.934126086 | 0.976739727 |
| g MGYG-HGUT-04604 | g Verticillium                 | -0.022467495 | 0.544188801 | 0.816215242 |
| g MGYG-HGUT-04604 | g unclassified Tremellomycetes | -0.0094794   | 0.798057557 | 0.929559171 |
| g MGYG-HGUT-04604 | g Candida                      | -0.008653163 | 0.815326852 | 0.934957602 |
| g MGYG-HGUT-04604 | g Cladosporium                 | -0.007285322 | 0.844110163 | 0.947129016 |
| g MGYG-HGUT-04604 | g Debaryomyces                 | -0.039916921 | 0.281115468 | 0.657094722 |
| g MGYG-HGUT-04604 | g Aspergillus                  | 0.009309964  | 0.801591232 | 0.930555602 |
| g MGYG-HGUT-04604 | g Kazachstania                 | -0.016378525 | 0.658418142 | 0.874969331 |
| g MGYG-HGUT-04604 | g Malassezia                   | 0.011538804  | 0.755457602 | 0.911989902 |
| g MGYG-HGUT-04604 | g unclassified Fungi           | -0.001855031 | 0.960067634 | 0.985114701 |
| g MGYG-HGUT-04604 | g Mycosphaerella               | -0.059131989 | 0.110173398 | 0.492961901 |
| g MGYG-HGUT-04604 | g Simplicillium                | 0.036757837  | 0.320974787 | 0.678140479 |
| g MGYG-HGUT-04604 | g unclassified Cordycipitaceae | 0.013600052  | 0.713550037 | 0.902579029 |
| g MGYG-HGUT-04604 | g unidentified                 | -0.008718356 | 0.813960856 | 0.934678606 |
| g MGYG-HGUT-03594 | g Verticillium                 | 0.011280484  | 0.760763504 | 0.914402476 |
| g MGYG-HGUT-03594 | g unclassified Tremellomycetes | 0.029706177  | 0.422571022 | 0.746980426 |
| g MGYG-HGUT-03594 | g Candida                      | -0.05176517  | 0.162077688 | 0.559767285 |
| g MGYG-HGUT-03594 | g Cladosporium                 | 0.024290859  | 0.512001032 | 0.800269261 |
| g MGYG-HGUT-03594 | g Debaryomyces                 | -0.062832292 | 0.089589365 | 0.467278702 |
| g MGYG-HGUT-03594 | g Aspergillus                  | 0.058717765  | 0.112692854 | 0.495487035 |
| g MGYG-HGUT-03594 | g Kazachstania                 | 0.02114374   | 0.568169763 | 0.83054176  |
| g MGYG-HGUT-03594 | g Malassezia                   | -0.013238611 | 0.720840588 | 0.905336886 |
| g MGYG-HGUT-03594 | g unclassified Fungi           | 0.03052871   | 0.40983464  | 0.740965344 |
| g MGYG-HGUT-03594 | g Mycosphaerella               | -0.074567382 | 0.043859039 | 0.365142621 |
| g MGYG-HGUT-03594 | g Simplicillium                | 0.01788357   | 0.629287867 | 0.859818244 |
| g MGYG-HGUT-03594 | g unclassified Cordycipitaceae | 0.052388157  | 0.157078175 | 0.554156001 |
| g MGYG-HGUT-03594 | g unidentified                 | -0.002731441 | 0.9412302   | 0.978494742 |
| g MGYG-HGUT-03366 | g Verticillium                 | 0.028087806  | 0.448295154 | 0.762502994 |
| g MGYG-HGUT-03366 | g unclassified Tremellomycetes | -0.09971689  | 0.006972382 | 0.159012386 |
| g MGYG-HGUT-03366 | g Candida                      | 0.012231982  | 0.741277094 | 0.909337726 |
| g MGYG-HGUT-03366 | g Cladosporium                 | -0.045834221 | 0.215808702 | 0.603186168 |
| g MGYG-HGUT-03366 | g Debaryomyces                 | 0.034696942  | 0.348872608 | 0.700791561 |
| g MGYG-HGUT-03366 | g Aspergillus                  | 0.021191736  | 0.567291541 | 0.830212925 |
| g MGYG-HGUT-03366 | g Kazachstania                 | -0.054174797 | 0.143387305 | 0.538440191 |
| g MGYG-HGUT-03366 | g Malassezia                   | -0.019696549 | 0.594950377 | 0.844389068 |
| g MGYG-HGUT-03366 | g unclassified Fungi           | 0.026249723  | 0.478559312 | 0.780181171 |
| g MGYG-HGUT-03366 | g Mycosphaerella               | -0.06233515  | 0.092160414 | 0.471586801 |
| g MGYG-HGUT-03366 | g Simplicillium                | -0.022547132 | 0.542762286 | 0.816215242 |
| g MGYG-HGUT-03366 | g unclassified Cordycipitaceae | 0.025291993  | 0.494759216 | 0.787688967 |
| g MGYG-HGUT-03366 | g unidentified                 | 0.029469561  | 0.426277287 | 0.749727648 |
| g Bariatricus     | g Verticillium                 | -0.044143238 | 0.233245611 | 0.617638717 |
| g Bariatricus     | g unclassified Tremellomycetes | 0.025125167  | 0.497610668 | 0.789663628 |
| g Bariatricus     | g Candida                      | -0.015309672 | 0.679428124 | 0.885977623 |
| g Bariatricus     | g Cladosporium                 | 0.065190537  | 0.078168199 | 0.450222934 |
| g Bariatricus     | g Debaryomyces                 | -0.035515885 | 0.337607804 | 0.692361927 |
| g Bariatricus     | g Aspergillus                  | 0.004268198  | 0.908284739 | 0.968963744 |
| g Bariatricus     | g Kazachstania                 | 0.011119291  | 0.764080145 | 0.915477365 |
| g Bariatricus     | g Malassezia                   | 0.038779844  | 0.295057761 | 0.663895647 |
| g Bariatricus     | g unclassified Fungi           | -0.045851431 | 0.215636195 | 0.603186168 |
| g Bariatricus     | g Mycosphaerella               | -0.026157343 | 0.480109207 | 0.780189053 |
| g Bariatricus     | g Simplicillium                | 0.022555108  | 0.54261951  | 0.816215242 |
| g Bariatricus     | g unclassified Cordycipitaceae | 0.037630715  | 0.30960995  | 0.672197886 |
| g Bariatricus     | g unidentified                 | -0.065707568 | 0.075829387 | 0.446288416 |
| g MGYG-HGUT-04132 | g Verticillium                 | 0.057543618  | 0.120081134 | 0.503845583 |
| g MGYG-HGUT-04132 | g unclassified Tremellomycetes | -0.038008571 | 0.304773571 | 0.670057703 |
| g MGYG-HGUT-04132 | g Candida                      | -0.076430041 | 0.038835458 | 0.345770459 |
| g MGYG-HGUT-04132 | g Cladosporium                 | -0.001429802 | 0.969216138 | 0.988740749 |
| g MGYG-HGUT-04132 | g Debaryomyces                 | -0.03748721  | 0.311459923 | 0.672399691 |
| g MGYG-HGUT-04132 | g Aspergillus                  | -0.000840197 | 0.981907493 | 0.99307513  |
| g MGYG-HGUT-04132 | g Kazachstania                 | -0.04069794  | 0.271801682 | 0.649109772 |

|                   |                                |              |             |             |
|-------------------|--------------------------------|--------------|-------------|-------------|
| g MGYG-HGUT-04132 | g Malassezia                   | 0.049614631  | 0.180258015 | 0.575003251 |
| g MGYG-HGUT-04132 | g unclassified Fungi           | 0.030062211  | 0.417029908 | 0.744290485 |
| g MGYG-HGUT-04132 | g Mycosphaerella               | -0.026389042 | 0.476227093 | 0.777950599 |
| g MGYG-HGUT-04132 | g Simplicillium                | 0.022091945  | 0.550940925 | 0.819498313 |
| g MGYG-HGUT-04132 | g unclassified Cordycipitaceae | 0.098642311  | 0.007609084 | 0.168194189 |
| g MGYG-HGUT-04132 | g unidentified                 | 0.020537754  | 0.579313533 | 0.836772676 |
| g MGYG-HGUT-04210 | g Verticillium                 | 0.004941448  | 0.893897477 | 0.964392857 |
| g MGYG-HGUT-04210 | g unclassified Tremellomycetes | -0.018543261 | 0.616695314 | 0.854506981 |
| g MGYG-HGUT-04210 | g Candida                      | -0.068697601 | 0.063397593 | 0.421138313 |
| g MGYG-HGUT-04210 | g Cladosporium                 | 0.008923324  | 0.809669876 | 0.933584001 |
| g MGYG-HGUT-04210 | g Debaryomyces                 | -0.042658448 | 0.249359066 | 0.631653529 |
| g MGYG-HGUT-04210 | g Aspergillus                  | -0.012083898 | 0.744299305 | 0.909574751 |
| g MGYG-HGUT-04210 | g Kazachstania                 | -0.046224041 | 0.211925438 | 0.600680647 |
| g MGYG-HGUT-04210 | g Malassezia                   | 0.040280882  | 0.276748605 | 0.654133065 |
| g MGYG-HGUT-04210 | g unclassified Fungi           | -0.012788101 | 0.72996322  | 0.907197641 |
| g MGYG-HGUT-04210 | g Mycosphaerella               | -0.025710575 | 0.487643174 | 0.783353899 |
| g MGYG-HGUT-04210 | g Simplicillium                | -0.039522103 | 0.285905073 | 0.658995314 |
| g MGYG-HGUT-04210 | g unclassified Cordycipitaceae | 0.060060535  | 0.104687057 | 0.484813319 |
| g MGYG-HGUT-04210 | g unidentified                 | 0.025882156  | 0.484742254 | 0.781546911 |
| g Ruminococcus G  | g Verticillium                 | 0.016424403  | 0.657522182 | 0.874757951 |
| g Ruminococcus G  | g unclassified Tremellomycetes | 0.01436274   | 0.698252109 | 0.895302916 |
| g Ruminococcus G  | g Candida                      | -0.021974436 | 0.553062065 | 0.820367644 |
| g Ruminococcus G  | g Cladosporium                 | 0.061426955  | 0.097009747 | 0.477459115 |
| g Ruminococcus G  | g Debaryomyces                 | -0.024840765 | 0.502491849 | 0.793568839 |
| g Ruminococcus G  | g Aspergillus                  | -0.002735687 | 0.941138995 | 0.978494742 |
| g Ruminococcus G  | g Kazachstania                 | -0.039439643 | 0.286912318 | 0.659118154 |
| g Ruminococcus G  | g Malassezia                   | 0.007894993  | 0.831252839 | 0.94102335  |
| g Ruminococcus G  | g unclassified Fungi           | 0.002145218  | 0.953827423 | 0.983054781 |
| g Ruminococcus G  | g Mycosphaerella               | -0.065800852 | 0.075413543 | 0.444977361 |
| g Ruminococcus G  | g Simplicillium                | 0.043543486  | 0.239663324 | 0.623263007 |
| g Ruminococcus G  | g unclassified Cordycipitaceae | 0.083066546  | 0.024709759 | 0.292809257 |
| g Ruminococcus G  | g unidentified                 | -0.072979708 | 0.048563146 | 0.37953856  |
| g MGYG-HGUT-02216 | g Verticillium                 | 0.009250244  | 0.802837702 | 0.931027788 |
| g MGYG-HGUT-02216 | g unclassified Tremellomycetes | 0.084948791  | 0.021619677 | 0.2798591   |
| g MGYG-HGUT-02216 | g Candida                      | -0.021303492 | 0.565249145 | 0.829039606 |
| g MGYG-HGUT-02216 | g Cladosporium                 | 0.04623218   | 0.2118449   | 0.600680647 |
| g MGYG-HGUT-02216 | g Debaryomyces                 | -0.062193707 | 0.092902616 | 0.471954484 |
| g MGYG-HGUT-02216 | g Aspergillus                  | 0.07114907   | 0.054504733 | 0.399257624 |
| g MGYG-HGUT-02216 | g Kazachstania                 | 0.001208626  | 0.973976255 | 0.990490577 |
| g MGYG-HGUT-02216 | g Malassezia                   | 0.032197775  | 0.384700974 | 0.725207645 |
| g MGYG-HGUT-02216 | g unclassified Fungi           | 0.039199116  | 0.289863976 | 0.660061436 |
| g MGYG-HGUT-02216 | g Mycosphaerella               | -0.02402103  | 0.516701056 | 0.802865612 |
| g MGYG-HGUT-02216 | g Simplicillium                | 0.017335053  | 0.639841    | 0.863952719 |
| g MGYG-HGUT-02216 | g unclassified Cordycipitaceae | 0.031803097  | 0.390557712 | 0.729773041 |
| g MGYG-HGUT-02216 | g unidentified                 | 0.023660362  | 0.523018018 | 0.805967186 |
| g MGYG-HGUT-01603 | g Verticillium                 | -0.000756501 | 0.9837095   | 0.993484837 |
| g MGYG-HGUT-01603 | g unclassified Tremellomycetes | 0.015985548  | 0.666112579 | 0.879421986 |
| g MGYG-HGUT-01603 | g Candida                      | -0.040412803 | 0.275177247 | 0.653130896 |
| g MGYG-HGUT-01603 | g Cladosporium                 | -0.007197326 | 0.845969414 | 0.947820248 |
| g MGYG-HGUT-01603 | g Debaryomyces                 | -0.065772106 | 0.075541488 | 0.445089102 |
| g MGYG-HGUT-01603 | g Aspergillus                  | 0.054257475  | 0.142776604 | 0.537864728 |
| g MGYG-HGUT-01603 | g Kazachstania                 | 0.006156204  | 0.86802939  | 0.955229514 |
| g MGYG-HGUT-01603 | g Malassezia                   | 0.015825417  | 0.669258066 | 0.880657424 |
| g MGYG-HGUT-01603 | g unclassified Fungi           | -0.044292114 | 0.231671568 | 0.61716312  |
| g MGYG-HGUT-01603 | g Mycosphaerella               | -0.040938836 | 0.268971999 | 0.64629012  |
| g MGYG-HGUT-01603 | g Simplicillium                | 0.050112379  | 0.175921259 | 0.571420949 |
| g MGYG-HGUT-01603 | g unclassified Cordycipitaceae | 0.014573948  | 0.69403695  | 0.894446353 |
| g MGYG-HGUT-01603 | g unidentified                 | 0.025519548  | 0.490883853 | 0.785245012 |
| g MGYG-HGUT-02655 | g Verticillium                 | -0.048340985 | 0.19171503  | 0.581131036 |
| g MGYG-HGUT-02655 | g unclassified Tremellomycetes | -0.008792278 | 0.812412659 | 0.934142805 |
| g MGYG-HGUT-02655 | g Candida                      | 0.006474805  | 0.861266947 | 0.953015155 |
| g MGYG-HGUT-02655 | g Cladosporium                 | -0.006418715 | 0.862456766 | 0.953015155 |
| g MGYG-HGUT-02655 | g Debaryomyces                 | -0.066732432 | 0.071361804 | 0.442093864 |
| g MGYG-HGUT-02655 | g Aspergillus                  | 0.026456733  | 0.475096165 | 0.776548009 |
| g MGYG-HGUT-02655 | g Kazachstania                 | -0.097500405 | 0.008342224 | 0.17418732  |
| g MGYG-HGUT-02655 | g Malassezia                   | 0.059394323  | 0.108600902 | 0.490907621 |
| g MGYG-HGUT-02655 | g unclassified Fungi           | 0.045105156  | 0.223208163 | 0.610490768 |
| g MGYG-HGUT-02655 | g Mycosphaerella               | 0.019384758  | 0.600794601 | 0.847052968 |
| g MGYG-HGUT-02655 | g Simplicillium                | 0.017449805  | 0.637627124 | 0.863812758 |
| g MGYG-HGUT-02655 | g unclassified Cordycipitaceae | 0.019697311  | 0.594936118 | 0.844389068 |
| g MGYG-HGUT-02655 | g unidentified                 | 0.079163436  | 0.032351594 | 0.324805088 |
| g MGYG-HGUT-02837 | g Verticillium                 | 0.023013062  | 0.534453634 | 0.812123595 |
| g MGYG-HGUT-02837 | g unclassified Tremellomycetes | -0.012528761 | 0.73523219  | 0.907315107 |
| g MGYG-HGUT-02837 | g Candida                      | -0.064703315 | 0.080425474 | 0.45101344  |
| g MGYG-HGUT-02837 | g Cladosporium                 | -0.032020838 | 0.387319935 | 0.727203277 |
| g MGYG-HGUT-02837 | g Debaryomyces                 | -0.061403255 | 0.097138969 | 0.477459115 |
| g MGYG-HGUT-02837 | g Aspergillus                  | 0.04481176   | 0.226236453 | 0.612967811 |
| g MGYG-HGUT-02837 | g Kazachstania                 | -0.00994851  | 0.788295751 | 0.925318429 |

|                     |                                |              |             |             |
|---------------------|--------------------------------|--------------|-------------|-------------|
| g MGYG-HGUT-02837   | g Malassezia                   | 0.05842731   | 0.114486376 | 0.497329568 |
| g MGYG-HGUT-02837   | g unclassified Fungi           | -0.012902187 | 0.727649365 | 0.907012052 |
| g MGYG-HGUT-02837   | g Mycosphaerella               | -0.083415885 | 0.024108955 | 0.289581118 |
| g MGYG-HGUT-02837   | g Simplicillium                | 0.006352138  | 0.863869435 | 0.953825789 |
| g MGYG-HGUT-02837   | g unclassified Cordycipitaceae | 0.025498597  | 0.491239972 | 0.785360536 |
| g MGYG-HGUT-02837   | g unidentified                 | 0.008817055  | 0.811893896 | 0.934113162 |
| g MGYG-HGUT-02628   | g Verticillium                 | -0.024594126 | 0.506745264 | 0.796550563 |
| g MGYG-HGUT-02628   | g unclassified Tremellomycetes | 0.033578129  | 0.364642548 | 0.71390332  |
| g MGYG-HGUT-02628   | g Candida                      | -0.005293035 | 0.886397636 | 0.96210924  |
| g MGYG-HGUT-02628   | g Cladosporium                 | 0.024017852  | 0.516756538 | 0.802865612 |
| g MGYG-HGUT-02628   | g Debaryomyces                 | -0.041656495 | 0.260661929 | 0.638638484 |
| g MGYG-HGUT-02628   | g Aspergillus                  | 0.041455113  | 0.262975719 | 0.641200244 |
| g MGYG-HGUT-02628   | g Kazachstania                 | 0.035526105  | 0.337468712 | 0.692361927 |
| g MGYG-HGUT-02628   | g Malassezia                   | 0.030569799  | 0.409204436 | 0.740561525 |
| g MGYG-HGUT-02628   | g unclassified Fungi           | -0.030789494 | 0.405844634 | 0.738165679 |
| g MGYG-HGUT-02628   | g Mycosphaerella               | 0.002313521  | 0.950209478 | 0.982348232 |
| g MGYG-HGUT-02628   | g Simplicillium                | 0.016137895  | 0.66312542  | 0.87769771  |
| g MGYG-HGUT-02628   | g unclassified Cordycipitaceae | 0.055624583  | 0.13296488  | 0.521431795 |
| g MGYG-HGUT-02628   | g unidentified                 | 0.016016772  | 0.665499916 | 0.879421986 |
| g Anaerosporobacter | g Verticillium                 | -0.021405835 | 0.563381889 | 0.828225754 |
| g Anaerosporobacter | g unclassified Tremellomycetes | 0.013594926  | 0.713653255 | 0.902579029 |
| g Anaerosporobacter | g Candida                      | -0.043043599 | 0.245106554 | 0.628475298 |
| g Anaerosporobacter | g Cladosporium                 | 0.021615212  | 0.559571024 | 0.825739866 |
| g Anaerosporobacter | g Debaryomyces                 | 0.002819752  | 0.939333702 | 0.978000513 |
| g Anaerosporobacter | g Aspergillus                  | -0.033111459 | 0.371349713 | 0.717854628 |
| g Anaerosporobacter | g Kazachstania                 | 0.044542263  | 0.229043752 | 0.613605313 |
| g Anaerosporobacter | g Malassezia                   | 0.049176016  | 0.184144819 | 0.57604579  |
| g Anaerosporobacter | g unclassified Fungi           | -0.015681733 | 0.672085418 | 0.881783585 |
| g Anaerosporobacter | g Mycosphaerella               | -0.010702773 | 0.772670106 | 0.918101184 |
| g Anaerosporobacter | g Simplicillium                | -0.055612989 | 0.133045843 | 0.521441152 |
| g Anaerosporobacter | g unclassified Cordycipitaceae | 0.046511601  | 0.209093323 | 0.598168571 |
| g Anaerosporobacter | g unidentified                 | -0.02432289  | 0.511444588 | 0.799661145 |
| g Pseudobutyrvibrio | g Verticillium                 | 0.005642587  | 0.878951253 | 0.959304186 |
| g Pseudobutyrvibrio | g unclassified Tremellomycetes | -0.027012346 | 0.465869341 | 0.771663103 |
| g Pseudobutyrvibrio | g Candida                      | -0.053576905 | 0.147863339 | 0.543295086 |
| g Pseudobutyrvibrio | g Cladosporium                 | -0.041821064 | 0.258781573 | 0.637931914 |
| g Pseudobutyrvibrio | g Debaryomyces                 | -0.035349254 | 0.339880746 | 0.694699556 |
| g Pseudobutyrvibrio | g Aspergillus                  | -0.033652747 | 0.363577156 | 0.713515619 |
| g Pseudobutyrvibrio | g Kazachstania                 | -0.017978977 | 0.627459888 | 0.859073688 |
| g Pseudobutyrvibrio | g Malassezia                   | 0.016005703  | 0.665717071 | 0.879421986 |
| g Pseudobutyrvibrio | g unclassified Fungi           | -0.008693198 | 0.814487925 | 0.934766567 |
| g Pseudobutyrvibrio | g Mycosphaerella               | -0.076952059 | 0.037518357 | 0.342257978 |
| g Pseudobutyrvibrio | g Simplicillium                | -0.004992156 | 0.892815207 | 0.964058217 |
| g Pseudobutyrvibrio | g unclassified Cordycipitaceae | 0.023948338  | 0.517971048 | 0.803768376 |
| g Pseudobutyrvibrio | g unidentified                 | 0.016674056  | 0.652655327 | 0.872275283 |
| g UBA2727           | g Verticillium                 | 0.051072471  | 0.167776329 | 0.563342385 |
| g UBA2727           | g unclassified Tremellomycetes | -0.046799088 | 0.206289384 | 0.595517977 |
| g UBA2727           | g Candida                      | 0.011303229  | 0.760295858 | 0.914048031 |
| g UBA2727           | g Cladosporium                 | -0.002297209 | 0.950560088 | 0.982403248 |
| g UBA2727           | g Debaryomyces                 | 0.032940229  | 0.373829744 | 0.718484102 |
| g UBA2727           | g Aspergillus                  | -0.04894762  | 0.186193112 | 0.577169451 |
| g UBA2727           | g Kazachstania                 | 0.074405431  | 0.044320597 | 0.366693168 |
| g UBA2727           | g Malassezia                   | 0.048884811  | 0.186759337 | 0.57752405  |
| g UBA2727           | g unclassified Fungi           | 0.004961522  | 0.893469016 | 0.964370576 |
| g UBA2727           | g Mycosphaerella               | -0.003734885 | 0.91970314  | 0.972219143 |
| g UBA2727           | g Simplicillium                | 0.009292132  | 0.801963369 | 0.930556502 |
| g UBA2727           | g unclassified Cordycipitaceae | 0.08023747   | 0.030069994 | 0.31505018  |
| g UBA2727           | g unidentified                 | -0.046916898 | 0.205148256 | 0.594438844 |
| g MGYG-HGUT-02025   | g Verticillium                 | 0.018682098  | 0.614059224 | 0.852976464 |
| g MGYG-HGUT-02025   | g unclassified Tremellomycetes | 0.016611031  | 0.653882583 | 0.872668116 |
| g MGYG-HGUT-02025   | g Candida                      | -0.022320273 | 0.546830851 | 0.816368923 |
| g MGYG-HGUT-02025   | g Cladosporium                 | 0.049493913  | 0.181321644 | 0.575010893 |
| g MGYG-HGUT-02025   | g Debaryomyces                 | -0.080623737 | 0.029283884 | 0.312580107 |
| g MGYG-HGUT-02025   | g Aspergillus                  | 0.051311839  | 0.16579038  | 0.562504371 |
| g MGYG-HGUT-02025   | g Kazachstania                 | 0.026870005  | 0.468223636 | 0.773111449 |
| g MGYG-HGUT-02025   | g Malassezia                   | 0.096711686  | 0.008884789 | 0.180264028 |
| g MGYG-HGUT-02025   | g unclassified Fungi           | 0.008647034  | 0.815455284 | 0.935003556 |
| g MGYG-HGUT-02025   | g Mycosphaerella               | -0.015910493 | 0.667586167 | 0.879421986 |
| g MGYG-HGUT-02025   | g Simplicillium                | 0.042113269  | 0.255466004 | 0.635647844 |
| g MGYG-HGUT-02025   | g unclassified Cordycipitaceae | 0.047655737  | 0.198096028 | 0.58591995  |
| g MGYG-HGUT-02025   | g unidentified                 | 0.020664501  | 0.57697428  | 0.836262521 |
| g MGYG-HGUT-01187   | g Verticillium                 | -0.045399745 | 0.220196793 | 0.607083027 |
| g MGYG-HGUT-01187   | g unclassified Tremellomycetes | 0.038214351  | 0.302160857 | 0.668551599 |
| g MGYG-HGUT-01187   | g Candida                      | -0.046842841 | 0.205865047 | 0.595346722 |
| g MGYG-HGUT-01187   | g Cladosporium                 | 0.058800359  | 0.112186906 | 0.495063318 |
| g MGYG-HGUT-01187   | g Debaryomyces                 | 0.033139019  | 0.37095151  | 0.717574529 |
| g MGYG-HGUT-01187   | g Aspergillus                  | -0.044755953 | 0.226815769 | 0.612967811 |
| g MGYG-HGUT-01187   | g Kazachstania                 | 0.010346117  | 0.780047711 | 0.921371303 |



|                   |                                |              |             |             |
|-------------------|--------------------------------|--------------|-------------|-------------|
| g MGYG-HGUT-01187 | g Malassezia                   | -0.029502435 | 0.425761229 | 0.749526755 |
| g MGYG-HGUT-01187 | g unclassified Fungi           | -0.077913711 | 0.03519121  | 0.333913017 |
| g MGYG-HGUT-01187 | g Mycosphaerella               | -0.027320091 | 0.460801806 | 0.769075712 |
| g MGYG-HGUT-01187 | g Simplicillium                | 0.032670375  | 0.377758896 | 0.721374462 |
| g MGYG-HGUT-01187 | g unclassified Cordycipitaceae | 0.001907631  | 0.958936336 | 0.984847119 |
| g MGYG-HGUT-01187 | g unidentified                 | -0.02528813  | 0.494825147 | 0.787688967 |
| g MGYG-HGUT-03936 | g Verticillium                 | -0.030157001 | 0.415561872 | 0.743848203 |
| g MGYG-HGUT-03936 | g unclassified Tremellomycetes | -0.020368845 | 0.582437847 | 0.838552014 |
| g MGYG-HGUT-03936 | g Candida                      | -0.064628022 | 0.080778972 | 0.452126167 |
| g MGYG-HGUT-03936 | g Cladosporium                 | -0.006107379 | 0.869066587 | 0.955357756 |
| g MGYG-HGUT-03936 | g Debaryomyces                 | 0.006186292  | 0.867390332 | 0.955221614 |
| g MGYG-HGUT-03936 | g Aspergillus                  | -0.044550684 | 0.228955662 | 0.613524642 |
| g MGYG-HGUT-03936 | g Kazachstania                 | -0.042928407 | 0.246373045 | 0.629434951 |
| g MGYG-HGUT-03936 | g Malassezia                   | -0.044383219 | 0.230712041 | 0.615891731 |
| g MGYG-HGUT-03936 | g unclassified Fungi           | -0.055430271 | 0.134326814 | 0.52297511  |
| g MGYG-HGUT-03936 | g Mycosphaerella               | -0.068480166 | 0.064241052 | 0.423004068 |
| g MGYG-HGUT-03936 | g Simplicillium                | 0.022683385  | 0.54032593  | 0.815420595 |
| g MGYG-HGUT-03936 | g unclassified Cordycipitaceae | -0.015452389 | 0.676607927 | 0.884589212 |
| g MGYG-HGUT-03936 | g unidentified                 | -0.00829538  | 0.822833319 | 0.938379371 |
| g MGYG-HGUT-00991 | g Verticillium                 | -0.032544369 | 0.379602237 | 0.722533174 |
| g MGYG-HGUT-00991 | g unclassified Tremellomycetes | 0.013897065  | 0.70757851  | 0.900600889 |
| g MGYG-HGUT-00991 | g Candida                      | -0.001104151 | 0.97622507  | 0.990831929 |
| g MGYG-HGUT-00991 | g Cladosporium                 | 0.050477447  | 0.17279021  | 0.56685821  |
| g MGYG-HGUT-00991 | g Debaryomyces                 | 0.012997107  | 0.72572611  | 0.906885231 |
| g MGYG-HGUT-00991 | g Aspergillus                  | 0.005117838  | 0.890133609 | 0.962904765 |
| g MGYG-HGUT-00991 | g Kazachstania                 | 0.058875326  | 0.111729223 | 0.495063318 |
| g MGYG-HGUT-00991 | g Malassezia                   | -0.018367252 | 0.620044278 | 0.856123107 |
| g MGYG-HGUT-00991 | g unclassified Fungi           | -0.020294331 | 0.583818603 | 0.839104641 |
| g MGYG-HGUT-00991 | g Mycosphaerella               | -0.010816067 | 0.770330811 | 0.917329312 |
| g MGYG-HGUT-00991 | g Simplicillium                | -0.023625023 | 0.523639082 | 0.806147397 |
| g MGYG-HGUT-00991 | g unclassified Cordycipitaceae | 0.049382974  | 0.182303206 | 0.575010893 |
| g MGYG-HGUT-00991 | g unidentified                 | -0.049674789 | 0.179729703 | 0.57459206  |
| g Anaerocolumna   | g Verticillium                 | 0.029978561  | 0.418327933 | 0.744941528 |
| g Anaerocolumna   | g unclassified Tremellomycetes | -0.034329238 | 0.354007108 | 0.705388488 |
| g Anaerocolumna   | g Candida                      | -0.053317649 | 0.149837028 | 0.546638764 |
| g Anaerocolumna   | g Cladosporium                 | 0.015150194  | 0.682584822 | 0.887523438 |
| g Anaerocolumna   | g Debaryomyces                 | 0.023296842  | 0.529424727 | 0.810176784 |
| g Anaerocolumna   | g Aspergillus                  | 0.020113787  | 0.587170446 | 0.841243086 |
| g Anaerocolumna   | g Kazachstania                 | -0.012289834 | 0.740097463 | 0.908972998 |
| g Anaerocolumna   | g Malassezia                   | 0.003813138  | 0.918026616 | 0.971502933 |
| g Anaerocolumna   | g unclassified Fungi           | -0.042364883 | 0.252634726 | 0.633802908 |
| g Anaerocolumna   | g Mycosphaerella               | -0.013036683 | 0.724924736 | 0.906744053 |
| g Anaerocolumna   | g Simplicillium                | 0.012419183  | 0.737462226 | 0.907794719 |
| g Anaerocolumna   | g unclassified Cordycipitaceae | 0.055847359  | 0.131416596 | 0.518655697 |
| g Anaerocolumna   | g unidentified                 | 0.005800534  | 0.875590021 | 0.957673757 |
| g An181           | g Verticillium                 | -0.085382641 | 0.020957006 | 0.27879145  |
| g An181           | g unclassified Tremellomycetes | 0.097951327  | 0.008045501 | 0.172334585 |
| g An181           | g Candida                      | -0.042946682 | 0.24617182  | 0.629434951 |
| g An181           | g Cladosporium                 | 0.092457244  | 0.012389628 | 0.21883174  |
| g An181           | g Debaryomyces                 | -0.028500763 | 0.441648146 | 0.75910048  |
| g An181           | g Aspergillus                  | -0.00192105  | 0.958647718 | 0.984847119 |
| g An181           | g Kazachstania                 | 0.041032473  | 0.267877564 | 0.644978472 |
| g An181           | g Malassezia                   | -0.049754072 | 0.179035186 | 0.574257008 |
| g An181           | g unclassified Fungi           | -0.071207194 | 0.054307185 | 0.398805432 |
| g An181           | g Mycosphaerella               | -0.081282943 | 0.027983036 | 0.307552108 |
| g An181           | g Simplicillium                | 0.027179228  | 0.463117532 | 0.769075712 |
| g An181           | g unclassified Cordycipitaceae | 0.00279495   | 0.939866295 | 0.978000513 |
| g An181           | g unidentified                 | -0.038213049 | 0.302177338 | 0.668551599 |
| g MGYG-HGUT-03214 | g Verticillium                 | 0.028517166  | 0.441385287 | 0.75910048  |
| g MGYG-HGUT-03214 | g unclassified Tremellomycetes | 0.001294474  | 0.97212851  | 0.990084454 |
| g MGYG-HGUT-03214 | g Candida                      | -0.032484263 | 0.380483467 | 0.722837319 |
| g MGYG-HGUT-03214 | g Cladosporium                 | 0.050464039  | 0.172904466 | 0.56685821  |
| g MGYG-HGUT-03214 | g Debaryomyces                 | -0.112576184 | 0.002302093 | 0.091581754 |
| g MGYG-HGUT-03214 | g Aspergillus                  | -0.001394177 | 0.969982781 | 0.98896291  |
| g MGYG-HGUT-03214 | g Kazachstania                 | -0.051460453 | 0.16456629  | 0.561723687 |
| g MGYG-HGUT-03214 | g Malassezia                   | 0.022631573  | 0.541251742 | 0.815654504 |
| g MGYG-HGUT-03214 | g unclassified Fungi           | 0.015833698  | 0.669095253 | 0.880657424 |
| g MGYG-HGUT-03214 | g Mycosphaerella               | -0.022331536 | 0.546628493 | 0.816368923 |
| g MGYG-HGUT-03214 | g Simplicillium                | -0.018298882 | 0.621347315 | 0.856123107 |
| g MGYG-HGUT-03214 | g unclassified Cordycipitaceae | 0.05095267   | 0.168776953 | 0.563848296 |
| g MGYG-HGUT-03214 | g unidentified                 | 0.009717952  | 0.793089434 | 0.927022902 |
| g MGYG-HGUT-04285 | g Verticillium                 | 0.039192232  | 0.289948753 | 0.660061436 |
| g MGYG-HGUT-04285 | g unclassified Tremellomycetes | -0.018239885 | 0.622472648 | 0.856123107 |
| g MGYG-HGUT-04285 | g Candida                      | -0.015970247 | 0.666412893 | 0.879421986 |
| g MGYG-HGUT-04285 | g Cladosporium                 | -0.02026558  | 0.584351778 | 0.839366163 |
| g MGYG-HGUT-04285 | g Debaryomyces                 | -0.096183249 | 0.009265687 | 0.185348778 |
| g MGYG-HGUT-04285 | g Aspergillus                  | 0.042285011  | 0.253531105 | 0.634509259 |
| g MGYG-HGUT-04285 | g Kazachstania                 | -0.014411634 | 0.697275477 | 0.895302916 |

|                   |                                |              |             |             |
|-------------------|--------------------------------|--------------|-------------|-------------|
| g MGYG-HGUT-04285 | g Malassezia                   | -0.017881309 | 0.629331216 | 0.859818244 |
| g MGYG-HGUT-04285 | g unclassified Fungi           | 0.005507165  | 0.88183487  | 0.960513102 |
| g MGYG-HGUT-04285 | g Mycosphaerella               | -0.023884008 | 0.519096284 | 0.804094928 |
| g MGYG-HGUT-04285 | g Simplicillium                | 0.000286262  | 0.993835261 | 0.997274144 |
| g MGYG-HGUT-04285 | g unclassified Cordycipitaceae | 0.024881784  | 0.501786284 | 0.79335163  |
| g MGYG-HGUT-04285 | g unidentified                 | 0.046520961  | 0.209001605 | 0.598168571 |
| g Anaerotignum    | g Verticillium                 | 0.006546888  | 0.859738327 | 0.952644081 |
| g Anaerotignum    | g unclassified Tremellomycetes | -0.004784785 | 0.897242409 | 0.965250198 |
| g Anaerotignum    | g Candida                      | -0.053753154 | 0.146532946 | 0.541068386 |
| g Anaerotignum    | g Cladosporium                 | -0.036665553 | 0.322192016 | 0.679081423 |
| g Anaerotignum    | g Debaryomyces                 | -0.101187511 | 0.006178461 | 0.149452601 |
| g Anaerotignum    | g Aspergillus                  | 0.021936097  | 0.553754968 | 0.8206689   |
| g Anaerotignum    | g Kazachstania                 | -0.062865344 | 0.0894205   | 0.467278702 |
| g Anaerotignum    | g Malassezia                   | -0.00324116  | 0.930288761 | 0.975521331 |
| g Anaerotignum    | g unclassified Fungi           | 0.019806317  | 0.592899068 | 0.843846367 |
| g Anaerotignum    | g Mycosphaerella               | -0.051634284 | 0.163143135 | 0.560877404 |
| g Anaerotignum    | g Simplicillium                | 0.020441426  | 0.581094346 | 0.837881654 |
| g Anaerotignum    | g unclassified Cordycipitaceae | 0.015106476  | 0.683451155 | 0.88815917  |
| g Anaerotignum    | g unidentified                 | 0.050362041  | 0.173775474 | 0.568788142 |
| g MGYG-HGUT-01118 | g Verticillium                 | 0.02879963   | 0.436872883 | 0.756007988 |
| g MGYG-HGUT-01118 | g unclassified Tremellomycetes | -0.10350548  | 0.00509103  | 0.138908586 |
| g MGYG-HGUT-01118 | g Candida                      | -0.012009398 | 0.74582126  | 0.909574751 |
| g MGYG-HGUT-01118 | g Cladosporium                 | -0.046265763 | 0.211512823 | 0.600680647 |
| g MGYG-HGUT-01118 | g Debaryomyces                 | -0.036643171 | 0.322487686 | 0.679153248 |
| g MGYG-HGUT-01118 | g Aspergillus                  | -0.00343214  | 0.926192511 | 0.974172444 |
| g MGYG-HGUT-01118 | g Kazachstania                 | -0.044133731 | 0.233346388 | 0.617638717 |
| g MGYG-HGUT-01118 | g Malassezia                   | 0.011442974  | 0.757424614 | 0.912291885 |
| g MGYG-HGUT-01118 | g unclassified Fungi           | 0.065153754  | 0.078336795 | 0.450277002 |
| g MGYG-HGUT-01118 | g Mycosphaerella               | 0.00947385   | 0.798173245 | 0.929569806 |
| g MGYG-HGUT-01118 | g Simplicillium                | -0.021739889 | 0.557307741 | 0.82366348  |
| g MGYG-HGUT-01118 | g unclassified Cordycipitaceae | 0.019790137  | 0.593201235 | 0.84388221  |
| g MGYG-HGUT-01118 | g unidentified                 | 0.043402124  | 0.241193904 | 0.625107494 |
| g CAG-274         | g Verticillium                 | 0.011221148  | 0.761983857 | 0.914666261 |
| g CAG-274         | g unclassified Tremellomycetes | 0.035310015  | 0.340417416 | 0.694699556 |
| g CAG-274         | g Candida                      | -0.066107951 | 0.074057655 | 0.444193078 |
| g CAG-274         | g Cladosporium                 | 0.01180961   | 0.749907558 | 0.910387945 |
| g CAG-274         | g Debaryomyces                 | -0.074265087 | 0.044723876 | 0.367648298 |
| g CAG-274         | g Aspergillus                  | -0.050674421 | 0.17111821  | 0.565255978 |
| g CAG-274         | g Kazachstania                 | 0.063522626  | 0.086115125 | 0.462104588 |
| g CAG-274         | g Malassezia                   | -0.022578502 | 0.542200877 | 0.816215242 |
| g CAG-274         | g unclassified Fungi           | 0.012986742  | 0.725936038 | 0.906948661 |
| g CAG-274         | g Mycosphaerella               | -0.012531985 | 0.735166612 | 0.907315107 |
| g CAG-274         | g Simplicillium                | -0.027014038 | 0.465841387 | 0.771663103 |
| g CAG-274         | g unclassified Cordycipitaceae | 0.035968006  | 0.331489808 | 0.687450594 |
| g CAG-274         | g unidentified                 | -0.011797556 | 0.750154324 | 0.910387945 |
| g MGYG-HGUT-01660 | g Verticillium                 | 0.021008569  | 0.570646618 | 0.831953372 |
| g MGYG-HGUT-01660 | g unclassified Tremellomycetes | -0.057455365 | 0.120651408 | 0.505147562 |
| g MGYG-HGUT-01660 | g Candida                      | 0.007740354  | 0.834509885 | 0.942443386 |
| g MGYG-HGUT-01660 | g Cladosporium                 | 0.023278675  | 0.529745957 | 0.810379077 |
| g MGYG-HGUT-01660 | g Debaryomyces                 | 0.021471111  | 0.562192452 | 0.827219568 |
| g MGYG-HGUT-01660 | g Aspergillus                  | -0.033587995 | 0.364501578 | 0.713891251 |
| g MGYG-HGUT-01660 | g Kazachstania                 | -0.0589726   | 0.111137554 | 0.494471808 |
| g MGYG-HGUT-01660 | g Malassezia                   | -0.005433933 | 0.883394892 | 0.961143815 |
| g MGYG-HGUT-01660 | g unclassified Fungi           | 0.014851059  | 0.68852084  | 0.891353992 |
| g MGYG-HGUT-01660 | g Mycosphaerella               | 0.004317219  | 0.907236078 | 0.968708003 |
| g MGYG-HGUT-01660 | g Simplicillium                | -0.059693174 | 0.10683116  | 0.487777626 |
| g MGYG-HGUT-01660 | g unclassified Cordycipitaceae | 0.057138627  | 0.122715547 | 0.507270257 |
| g MGYG-HGUT-01660 | g unidentified                 | -0.041839143 | 0.258575578 | 0.637931914 |
| g MGYG-HGUT-04547 | g Verticillium                 | -0.000804341 | 0.982679473 | 0.993395456 |
| g MGYG-HGUT-04547 | g unclassified Tremellomycetes | -0.045843751 | 0.215713162 | 0.603186168 |
| g MGYG-HGUT-04547 | g Candida                      | -0.039278276 | 0.288890312 | 0.659982142 |
| g MGYG-HGUT-04547 | g Cladosporium                 | 0.028879741  | 0.43559794  | 0.755531453 |
| g MGYG-HGUT-04547 | g Debaryomyces                 | 0.013734083  | 0.710853108 | 0.902091837 |
| g MGYG-HGUT-04547 | g Aspergillus                  | -0.037438417 | 0.312090589 | 0.672742944 |
| g MGYG-HGUT-04547 | g Kazachstania                 | -0.017669313 | 0.633401206 | 0.861635763 |
| g MGYG-HGUT-04547 | g Malassezia                   | 0.000652981  | 0.985938463 | 0.994395808 |
| g MGYG-HGUT-04547 | g unclassified Fungi           | -0.086019345 | 0.020016493 | 0.271909474 |
| g MGYG-HGUT-04547 | g Mycosphaerella               | 0.041538971  | 0.262010508 | 0.640201835 |
| g MGYG-HGUT-04547 | g Simplicillium                | 0.035781484  | 0.334005057 | 0.689781716 |
| g MGYG-HGUT-04547 | g unclassified Cordycipitaceae | 0.043607676  | 0.238970572 | 0.622994378 |
| g MGYG-HGUT-04547 | g unidentified                 | -0.057207267 | 0.122265906 | 0.506637511 |
| g MGYG-HGUT-01833 | g Verticillium                 | -0.01068031  | 0.773134157 | 0.918249304 |
| g MGYG-HGUT-01833 | g unclassified Tremellomycetes | -0.055208966 | 0.135891024 | 0.526353888 |
| g MGYG-HGUT-01833 | g Candida                      | -0.059211323 | 0.10969597  | 0.492584069 |
| g MGYG-HGUT-01833 | g Cladosporium                 | -0.011452573 | 0.757227522 | 0.912291885 |
| g MGYG-HGUT-01833 | g Debaryomyces                 | -0.047302173 | 0.201448406 | 0.590022167 |
| g MGYG-HGUT-01833 | g Aspergillus                  | -0.007838743 | 0.832437262 | 0.941418308 |
| g MGYG-HGUT-01833 | g Kazachstania                 | 0.066758477  | 0.071251134 | 0.441957504 |

|                   |                                |              |             |             |
|-------------------|--------------------------------|--------------|-------------|-------------|
| g MGYG-HGUT-01833 | g Malassezia                   | -0.075841252 | 0.040367868 | 0.351004747 |
| g MGYG-HGUT-01833 | g unclassified Fungi           | -0.001021106 | 0.978012744 | 0.991604689 |
| g MGYG-HGUT-01833 | g Mycosphaerella               | -0.018714235 | 0.613449748 | 0.852913577 |
| g MGYG-HGUT-01833 | g Simplicillium                | -0.023443446 | 0.526836177 | 0.808837394 |
| g MGYG-HGUT-01833 | g unclassified Cordycipitaceae | 0.041825673  | 0.258729046 | 0.637931914 |
| g MGYG-HGUT-01833 | g unidentified                 | 0.032969586  | 0.373403827 | 0.718484102 |
| g MGYG-HGUT-04634 | g Verticillium                 | -0.012137617 | 0.743202496 | 0.909574751 |
| g MGYG-HGUT-04634 | g unclassified Tremellomycetes | -0.045095582 | 0.223306526 | 0.610601979 |
| g MGYG-HGUT-04634 | g Candida                      | -0.020095648 | 0.587507699 | 0.841465036 |
| g MGYG-HGUT-04634 | g Cladosporium                 | 0.007290298  | 0.844005047 | 0.947111496 |
| g MGYG-HGUT-04634 | g Debaryomyces                 | -0.041130295 | 0.266737469 | 0.644840157 |
| g MGYG-HGUT-04634 | g Aspergillus                  | 0.016720671  | 0.651748212 | 0.871607266 |
| g MGYG-HGUT-04634 | g Kazachstania                 | -0.003247672 | 0.930149042 | 0.975504178 |
| g MGYG-HGUT-04634 | g Malassezia                   | 0.000555704  | 0.988033078 | 0.995185646 |
| g MGYG-HGUT-04634 | g unclassified Fungi           | -0.053788412 | 0.146267903 | 0.541002079 |
| g MGYG-HGUT-04634 | g Mycosphaerella               | -0.011783086 | 0.750450585 | 0.910387945 |
| g MGYG-HGUT-04634 | g Simplicillium                | 0.047745719  | 0.197249392 | 0.585839456 |
| g MGYG-HGUT-04634 | g unclassified Cordycipitaceae | 0.068094571  | 0.065759549 | 0.426650858 |
| g MGYG-HGUT-04634 | g unidentified                 | 0.012704955  | 0.731651112 | 0.907315107 |
| g MGYG-HGUT-01183 | g Verticillium                 | -0.009975659 | 0.787731819 | 0.925277255 |
| g MGYG-HGUT-01183 | g unclassified Tremellomycetes | -0.018369005 | 0.620010882 | 0.856123107 |
| g MGYG-HGUT-01183 | g Candida                      | -0.016064969 | 0.66455466  | 0.87877386  |
| g MGYG-HGUT-01183 | g Cladosporium                 | 0.008975566  | 0.808577102 | 0.933478229 |
| g MGYG-HGUT-01183 | g Debaryomyces                 | -0.060951002 | 0.099631252 | 0.478320958 |
| g MGYG-HGUT-01183 | g Aspergillus                  | 0.006097718  | 0.869271848 | 0.955357756 |
| g MGYG-HGUT-01183 | g Kazachstania                 | -0.00091605  | 0.980274408 | 0.99284684  |
| g MGYG-HGUT-01183 | g Malassezia                   | 0.012218898  | 0.741543953 | 0.909377461 |
| g MGYG-HGUT-01183 | g unclassified Fungi           | -0.029511844 | 0.425613601 | 0.749483281 |
| g MGYG-HGUT-01183 | g Mycosphaerella               | -0.03966119  | 0.284211551 | 0.658002559 |
| g MGYG-HGUT-01183 | g Simplicillium                | -0.042134919 | 0.255221531 | 0.635621145 |
| g MGYG-HGUT-01183 | g unclassified Cordycipitaceae | 0.043247957  | 0.242870945 | 0.626691134 |
| g MGYG-HGUT-01183 | g unidentified                 | -0.05133772  | 0.165576714 | 0.562504371 |
| g MGYG-HGUT-04067 | g Verticillium                 | 0.022776427  | 0.538665381 | 0.814978906 |
| g MGYG-HGUT-04067 | g unclassified Tremellomycetes | 0.008842854  | 0.811353824 | 0.934113162 |
| g MGYG-HGUT-04067 | g Candida                      | -0.039136182 | 0.290639645 | 0.660476148 |
| g MGYG-HGUT-04067 | g Cladosporium                 | 0.048191738  | 0.1930918   | 0.581804506 |
| g MGYG-HGUT-04067 | g Debaryomyces                 | -0.019907997 | 0.591001787 | 0.84265729  |
| g MGYG-HGUT-04067 | g Aspergillus                  | 0.011650623  | 0.75316437  | 0.911272051 |
| g MGYG-HGUT-04067 | g Kazachstania                 | -0.012574997 | 0.734291901 | 0.907315107 |
| g MGYG-HGUT-04067 | g Malassezia                   | 0.059051133  | 0.110661672 | 0.49410203  |
| g MGYG-HGUT-04067 | g unclassified Fungi           | -0.00795289  | 0.830034122 | 0.940630371 |
| g MGYG-HGUT-04067 | g Mycosphaerella               | 0.029857583  | 0.420209382 | 0.74604389  |
| g MGYG-HGUT-04067 | g Simplicillium                | -0.013681582 | 0.711909098 | 0.902091837 |
| g MGYG-HGUT-04067 | g unclassified Cordycipitaceae | 0.091444719  | 0.013385496 | 0.224405865 |
| g MGYG-HGUT-04067 | g unidentified                 | 0.013931715  | 0.706883019 | 0.900365443 |
| g MGYG-HGUT-00286 | g Verticillium                 | 0.021465326  | 0.562297819 | 0.827219568 |
| g MGYG-HGUT-00286 | g unclassified Tremellomycetes | -0.038596605 | 0.29734708  | 0.665940424 |
| g MGYG-HGUT-00286 | g Candida                      | -0.037869356 | 0.30654961  | 0.670552593 |
| g MGYG-HGUT-00286 | g Cladosporium                 | -0.003829885 | 0.91766788  | 0.971437239 |
| g MGYG-HGUT-00286 | g Debaryomyces                 | -0.074001148 | 0.045490672 | 0.370793362 |
| g MGYG-HGUT-00286 | g Aspergillus                  | -0.012332622 | 0.739225399 | 0.908534631 |
| g MGYG-HGUT-00286 | g Kazachstania                 | 0.054976369  | 0.137550135 | 0.530071323 |
| g MGYG-HGUT-00286 | g Malassezia                   | 0.006387192  | 0.863125572 | 0.953203381 |
| g MGYG-HGUT-00286 | g unclassified Fungi           | -0.035014293 | 0.344479378 | 0.696679266 |
| g MGYG-HGUT-00286 | g Mycosphaerella               | 0.040607486  | 0.272869439 | 0.650056134 |
| g MGYG-HGUT-00286 | g Simplicillium                | -0.002082768 | 0.955170128 | 0.983420654 |
| g MGYG-HGUT-00286 | g unclassified Cordycipitaceae | 0.039514068  | 0.286003115 | 0.659056958 |
| g MGYG-HGUT-00286 | g unidentified                 | -0.044927135 | 0.225042137 | 0.612060698 |
| g MGYG-HGUT-00967 | g Verticillium                 | -0.018619054 | 0.61525562  | 0.853406078 |
| g MGYG-HGUT-00967 | g unclassified Tremellomycetes | -0.073990317 | 0.045522375 | 0.370793362 |
| g MGYG-HGUT-00967 | g Candida                      | -0.028478462 | 0.442005659 | 0.759179335 |
| g MGYG-HGUT-00967 | g Cladosporium                 | -0.042635104 | 0.249618449 | 0.631737101 |
| g MGYG-HGUT-00967 | g Debaryomyces                 | 0.002290191  | 0.950710933 | 0.982463193 |
| g MGYG-HGUT-00967 | g Aspergillus                  | 0.00556813   | 0.880536503 | 0.959750565 |
| g MGYG-HGUT-00967 | g Kazachstania                 | 0.003834964  | 0.917559092 | 0.971437239 |
| g MGYG-HGUT-00967 | g Malassezia                   | -0.039750693 | 0.283125342 | 0.657890287 |
| g MGYG-HGUT-00967 | g unclassified Fungi           | -0.026078092 | 0.481441003 | 0.780189053 |
| g MGYG-HGUT-00967 | g Mycosphaerella               | -0.029987282 | 0.418192496 | 0.744941528 |
| g MGYG-HGUT-00967 | g Simplicillium                | -0.06926456  | 0.061241163 | 0.415557779 |
| g MGYG-HGUT-00967 | g unclassified Cordycipitaceae | 0.029165648  | 0.431065316 | 0.753212133 |
| g MGYG-HGUT-00967 | g unidentified                 | 0.003860033  | 0.91702211  | 0.971437239 |
| g MGYG-HGUT-04429 | g Verticillium                 | 0.042844906  | 0.24729397  | 0.629733759 |
| g MGYG-HGUT-04429 | g unclassified Tremellomycetes | -0.016535363 | 0.655357278 | 0.873577069 |
| g MGYG-HGUT-04429 | g Candida                      | -0.012556348 | 0.73467112  | 0.907315107 |
| g MGYG-HGUT-04429 | g Cladosporium                 | 0.022424972  | 0.544951264 | 0.816215242 |
| g MGYG-HGUT-04429 | g Debaryomyces                 | -0.115578114 | 0.001747859 | 0.082570732 |
| g MGYG-HGUT-04429 | g Aspergillus                  | 0.032227164  | 0.384267026 | 0.725207645 |
| g MGYG-HGUT-04429 | g Kazachstania                 | 0.037125299  | 0.316157703 | 0.675194937 |

|                    |                                |              |             |             |
|--------------------|--------------------------------|--------------|-------------|-------------|
| g MGYG-HGUT-04429  | g Malassezia                   | 0.050407184  | 0.173389577 | 0.567876355 |
| g MGYG-HGUT-04429  | g unclassified Fungi           | 0.028461272  | 0.442281342 | 0.759406322 |
| g MGYG-HGUT-04429  | g Mycosphaerella               | 0.020564448  | 0.578820497 | 0.836772676 |
| g MGYG-HGUT-04429  | g Simplicillium                | 0.009986522  | 0.787506196 | 0.925277255 |
| g MGYG-HGUT-04429  | g unclassified Cordycipitaceae | 0.056321636  | 0.128166886 | 0.51521926  |
| g MGYG-HGUT-04429  | g unidentified                 | 0.011732465  | 0.751487309 | 0.910387945 |
| g UBA1390          | g Verticillium                 | 0.062965876  | 0.088908431 | 0.465955266 |
| g UBA1390          | g unclassified Tremellomycetes | 0.006751679  | 0.855398374 | 0.950427981 |
| g UBA1390          | g Candida                      | -0.02670905  | 0.470893689 | 0.77381206  |
| g UBA1390          | g Cladosporium                 | 0.052952495  | 0.152650826 | 0.549189615 |
| g UBA1390          | g Debaryomyces                 | -0.106835448 | 0.003829827 | 0.121638936 |
| g UBA1390          | g Aspergillus                  | 0.027621297  | 0.455871867 | 0.766328212 |
| g UBA1390          | g Kazachstania                 | -0.033642743 | 0.363719888 | 0.713515619 |
| g UBA1390          | g Malassezia                   | 0.103788195  | 0.004970961 | 0.138428169 |
| g UBA1390          | g unclassified Fungi           | 0.007426357  | 0.841132065 | 0.945770831 |
| g UBA1390          | g Mycosphaerella               | -0.053138101 | 0.151215608 | 0.548001221 |
| g UBA1390          | g Simplicillium                | -0.001659189 | 0.964280457 | 0.987171422 |
| g UBA1390          | g unclassified Cordycipitaceae | 0.108064452  | 0.003441128 | 0.115234225 |
| g UBA1390          | g unidentified                 | -0.00807164  | 0.827535781 | 0.939989934 |
| g Cellulosilyticum | g Verticillium                 | -0.06335883  | 0.086929469 | 0.463886859 |
| g Cellulosilyticum | g unclassified Tremellomycetes | -0.021225742 | 0.566669681 | 0.829850341 |
| g Cellulosilyticum | g Candida                      | -0.114162657 | 0.001991833 | 0.084840998 |
| g Cellulosilyticum | g Cladosporium                 | 0.009686949  | 0.793734644 | 0.927484541 |
| g Cellulosilyticum | g Debaryomyces                 | 0.028254237  | 0.445609456 | 0.761797014 |
| g Cellulosilyticum | g Aspergillus                  | 0.02227603   | 0.547626079 | 0.816743504 |
| g Cellulosilyticum | g Kazachstania                 | -0.000791229 | 0.982961779 | 0.993959456 |
| g Cellulosilyticum | g Malassezia                   | -0.068634027 | 0.063643255 | 0.421193    |
| g Cellulosilyticum | g unclassified Fungi           | -0.030710225 | 0.407054997 | 0.738420989 |
| g Cellulosilyticum | g Mycosphaerella               | -0.053161384 | 0.151036301 | 0.547949889 |
| g Cellulosilyticum | g Simplicillium                | -0.030708616 | 0.407079585 | 0.738420989 |
| g Cellulosilyticum | g unclassified Cordycipitaceae | -0.011104994 | 0.764374521 | 0.915519623 |
| g Cellulosilyticum | g unidentified                 | -0.004608818 | 0.901001667 | 0.966260363 |
| g Niameybacter     | g Verticillium                 | -0.043560917 | 0.23947506  | 0.623263007 |
| g Niameybacter     | g unclassified Tremellomycetes | -0.065916903 | 0.074898802 | 0.444519981 |
| g Niameybacter     | g Candida                      | -0.046950921 | 0.204819556 | 0.594296482 |
| g Niameybacter     | g Cladosporium                 | 0.003856294  | 0.917102183 | 0.971437239 |
| g Niameybacter     | g Debaryomyces                 | -0.039692738 | 0.283828367 | 0.658002559 |
| g Niameybacter     | g Aspergillus                  | 0.030235859  | 0.414342919 | 0.742882112 |
| g Niameybacter     | g Kazachstania                 | 0.037384827  | 0.312784222 | 0.672824117 |
| g Niameybacter     | g Malassezia                   | -0.058676301 | 0.112947532 | 0.496143951 |
| g Niameybacter     | g unclassified Fungi           | -0.05906799  | 0.110559737 | 0.494063823 |
| g Niameybacter     | g Mycosphaerella               | -0.008038022 | 0.828242879 | 0.939989934 |
| g Niameybacter     | g Simplicillium                | -0.010209172 | 0.782885792 | 0.922652573 |
| g Niameybacter     | g unclassified Cordycipitaceae | -0.035536188 | 0.337331525 | 0.692361927 |
| g Niameybacter     | g unidentified                 | -0.029800179 | 0.421103867 | 0.74604389  |
| g MGYG-HGUT-04642  | g Verticillium                 | 0.037279058  | 0.314156199 | 0.67432067  |
| g MGYG-HGUT-04642  | g unclassified Tremellomycetes | -0.004585227 | 0.901505824 | 0.966538463 |
| g MGYG-HGUT-04642  | g Candida                      | -0.056981061 | 0.123752584 | 0.508632924 |
| g MGYG-HGUT-04642  | g Cladosporium                 | 0.067032892  | 0.070093629 | 0.439536772 |
| g MGYG-HGUT-04642  | g Debaryomyces                 | -0.09305932  | 0.01182902  | 0.212023267 |
| g MGYG-HGUT-04642  | g Aspergillus                  | -0.037753137 | 0.308037491 | 0.670986565 |
| g MGYG-HGUT-04642  | g Kazachstania                 | 0.01326387   | 0.720330267 | 0.905336886 |
| g MGYG-HGUT-04642  | g Malassezia                   | -0.001404628 | 0.969757877 | 0.988915665 |
| g MGYG-HGUT-04642  | g unclassified Fungi           | -0.013282328 | 0.719957423 | 0.905035573 |
| g MGYG-HGUT-04642  | g Mycosphaerella               | -0.010937904 | 0.76781744  | 0.916616044 |
| g MGYG-HGUT-04642  | g Simplicillium                | -0.024102181 | 0.515285178 | 0.802518289 |
| g MGYG-HGUT-04642  | g unclassified Cordycipitaceae | 0.069429055  | 0.060626971 | 0.412830947 |
| g MGYG-HGUT-04642  | g unidentified                 | -0.062496369 | 0.091320241 | 0.470392034 |
| g MGYG-HGUT-04273  | g Verticillium                 | 0.036026874  | 0.330698526 | 0.686878237 |
| g MGYG-HGUT-04273  | g unclassified Tremellomycetes | 0.010972687  | 0.767100344 | 0.916616044 |
| g MGYG-HGUT-04273  | g Candida                      | -0.023910641 | 0.51863028  | 0.80396368  |
| g MGYG-HGUT-04273  | g Cladosporium                 | 0.03905164   | 0.291683805 | 0.660859538 |
| g MGYG-HGUT-04273  | g Debaryomyces                 | -0.040659625 | 0.272253617 | 0.64974916  |
| g MGYG-HGUT-04273  | g Aspergillus                  | -0.033491832 | 0.365877125 | 0.714865535 |
| g MGYG-HGUT-04273  | g Kazachstania                 | -0.047485124 | 0.199708603 | 0.587155901 |
| g MGYG-HGUT-04273  | g Malassezia                   | 0.037137248  | 0.316001866 | 0.675194937 |
| g MGYG-HGUT-04273  | g unclassified Fungi           | -0.005389288 | 0.884346168 | 0.961776517 |
| g MGYG-HGUT-04273  | g Mycosphaerella               | 0.030930103  | 0.403702935 | 0.736936858 |
| g MGYG-HGUT-04273  | g Simplicillium                | -0.037393184 | 0.312675996 | 0.672824117 |
| g MGYG-HGUT-04273  | g unclassified Cordycipitaceae | 0.080167356  | 0.030214612 | 0.315608804 |
| g MGYG-HGUT-04273  | g unidentified                 | 0.033680326  | 0.363183879 | 0.713515619 |
| g MGYG-HGUT-00420  | g Verticillium                 | 0.05863071   | 0.113228075 | 0.496447096 |
| g MGYG-HGUT-00420  | g unclassified Tremellomycetes | -0.091882546 | 0.012946519 | 0.221324824 |
| g MGYG-HGUT-00420  | g Candida                      | -0.079631872 | 0.031338896 | 0.319842959 |
| g MGYG-HGUT-00420  | g Cladosporium                 | 0.005591221  | 0.880044838 | 0.959471922 |
| g MGYG-HGUT-00420  | g Debaryomyces                 | -0.103667316 | 0.005021982 | 0.138753557 |
| g MGYG-HGUT-00420  | g Aspergillus                  | -0.00515278  | 0.889388295 | 0.962882845 |
| g MGYG-HGUT-00420  | g Kazachstania                 | -0.05383267  | 0.145935724 | 0.540957635 |



|                   |                                |              |             |             |
|-------------------|--------------------------------|--------------|-------------|-------------|
| g MGYG-HGUT-00420 | g Malassezia                   | 0.035150589  | 0.342603434 | 0.695270538 |
| g MGYG-HGUT-00420 | g unclassified Fungi           | 0.047322877  | 0.201250967 | 0.590022167 |
| g MGYG-HGUT-00420 | g Mycosphaerella               | -0.031342483 | 0.39746083  | 0.732740506 |
| g MGYG-HGUT-00420 | g Simplicillium                | -0.01059186  | 0.774962243 | 0.919355432 |
| g MGYG-HGUT-00420 | g unclassified Cordycipitaceae | 0.038219921  | 0.302090336 | 0.668551599 |
| g MGYG-HGUT-00420 | g unidentified                 | 0.046848129  | 0.205813809 | 0.595346722 |
| g MGYG-HGUT-02626 | g Verticillium                 | 0.048046006  | 0.194443122 | 0.584046867 |
| g MGYG-HGUT-02626 | g unclassified Tremellomycetes | -0.04295021  | 0.246132981 | 0.629434951 |
| g MGYG-HGUT-02626 | g Candida                      | -0.041745076 | 0.259648634 | 0.638383329 |
| g MGYG-HGUT-02626 | g Cladosporium                 | 0.036400188  | 0.325708931 | 0.682100836 |
| g MGYG-HGUT-02626 | g Debaryomyces                 | -0.060018023 | 0.104933415 | 0.48522153  |
| g MGYG-HGUT-02626 | g Aspergillus                  | -0.04703053  | 0.204051942 | 0.593581285 |
| g MGYG-HGUT-02626 | g Kazachstania                 | -0.02418771  | 0.513795104 | 0.801136059 |
| g MGYG-HGUT-02626 | g Malassezia                   | 0.086769855  | 0.018955265 | 0.267090026 |
| g MGYG-HGUT-02626 | g unclassified Fungi           | -0.010511312 | 0.776628071 | 0.920334072 |
| g MGYG-HGUT-02626 | g Mycosphaerella               | -0.079811712 | 0.030957379 | 0.317741016 |
| g MGYG-HGUT-02626 | g Simplicillium                | 0.008016598  | 0.828693566 | 0.940394309 |
| g MGYG-HGUT-02626 | g unclassified Cordycipitaceae | 0.027209548  | 0.462618539 | 0.769075712 |
| g MGYG-HGUT-02626 | g unidentified                 | -0.041288525 | 0.2649004   | 0.64234852  |
| g CAG-145         | g Verticillium                 | 0.051442353  | 0.164715013 | 0.561723687 |
| g CAG-145         | g unclassified Tremellomycetes | -0.08081227  | 0.028906644 | 0.31117391  |
| g CAG-145         | g Candida                      | -0.009594561 | 0.795658171 | 0.928706681 |
| g CAG-145         | g Cladosporium                 | -0.00012668  | 0.997271893 | 0.998643711 |
| g CAG-145         | g Debaryomyces                 | -0.125482731 | 0.000673068 | 0.047801392 |
| g CAG-145         | g Aspergillus                  | 0.00083158   | 0.982093016 | 0.99313712  |
| g CAG-145         | g Kazachstania                 | -0.008397579 | 0.820687446 | 0.937561364 |
| g CAG-145         | g Malassezia                   | 0.046106248  | 0.213093505 | 0.600680647 |
| g CAG-145         | g unclassified Fungi           | -0.000554356 | 0.988062111 | 0.995185646 |
| g CAG-145         | g Mycosphaerella               | 0.021053929  | 0.561012589 | 0.82694459  |
| g CAG-145         | g Simplicillium                | -0.018688402 | 0.613939635 | 0.852976464 |
| g CAG-145         | g unclassified Cordycipitaceae | 0.080180613  | 0.030187223 | 0.315608804 |
| g CAG-145         | g unidentified                 | -0.006890904 | 0.85245038  | 0.949400054 |
| g UBA1191         | g Verticillium                 | 0.064762911  | 0.080146563 | 0.45101344  |
| g UBA1191         | g unclassified Tremellomycetes | -0.009747584 | 0.792472912 | 0.926965257 |
| g UBA1191         | g Candida                      | -0.000334517 | 0.992796117 | 0.996941403 |
| g UBA1191         | g Cladosporium                 | 0.049212061  | 0.183823094 | 0.575925162 |
| g UBA1191         | g Debaryomyces                 | 0.005802709  | 0.875543752 | 0.957673757 |
| g UBA1191         | g Aspergillus                  | 0.05323145   | 0.150497667 | 0.547902227 |
| g UBA1191         | g Kazachstania                 | 0.038795895  | 0.294857785 | 0.663646169 |
| g UBA1191         | g Malassezia                   | 0.065647733  | 0.076097104 | 0.446374478 |
| g UBA1191         | g unclassified Fungi           | -0.01075782  | 0.771533228 | 0.917860667 |
| g UBA1191         | g Mycosphaerella               | 0.06669735   | 0.071511091 | 0.442098997 |
| g UBA1191         | g Simplicillium                | 0.043266045  | 0.242673757 | 0.626487849 |
| g UBA1191         | g unclassified Cordycipitaceae | 0.085856657  | 0.020253244 | 0.273942808 |
| g UBA1191         | g unidentified                 | -0.0572835   | 0.121768035 | 0.506577845 |
| g Emergencia      | g Verticillium                 | 0.040287557  | 0.276668948 | 0.654133065 |
| g Emergencia      | g unclassified Tremellomycetes | 0.011191726  | 0.762589204 | 0.914830399 |
| g Emergencia      | g Candida                      | -0.004635607 | 0.900429222 | 0.96604016  |
| g Emergencia      | g Cladosporium                 | 0.076104845  | 0.039675615 | 0.350298383 |
| g Emergencia      | g Debaryomyces                 | -0.12085408  | 0.001060559 | 0.062177529 |
| g Emergencia      | g Aspergillus                  | 0.004315042  | 0.907282652 | 0.968708003 |
| g Emergencia      | g Kazachstania                 | -0.010829305 | 0.770057602 | 0.917328419 |
| g Emergencia      | g Malassezia                   | 0.039207967  | 0.289755003 | 0.660061436 |
| g Emergencia      | g unclassified Fungi           | 0.027295719  | 0.46120201  | 0.769075712 |
| g Emergencia      | g Mycosphaerella               | -0.024680265 | 0.505257609 | 0.795660555 |
| g Emergencia      | g Simplicillium                | -0.028367707 | 0.443783656 | 0.760874701 |
| g Emergencia      | g unclassified Cordycipitaceae | 0.077090982  | 0.0371743   | 0.341376127 |
| g Emergencia      | g unidentified                 | -0.036985439 | 0.317985525 | 0.676223819 |
| g Mogibacterium   | g Verticillium                 | 0.012863307  | 0.728437635 | 0.907012052 |
| g Mogibacterium   | g unclassified Tremellomycetes | -0.006390501 | 0.863055364 | 0.953203381 |
| g Mogibacterium   | g Candida                      | -0.04843842  | 0.190820114 | 0.580402598 |
| g Mogibacterium   | g Cladosporium                 | 0.032385255  | 0.3819378   | 0.723146503 |
| g Mogibacterium   | g Debaryomyces                 | -0.054450491 | 0.141358638 | 0.53603736  |
| g Mogibacterium   | g Aspergillus                  | 0.049719735  | 0.17933573  | 0.574257008 |
| g Mogibacterium   | g Kazachstania                 | -0.05948857  | 0.108040307 | 0.489838272 |
| g Mogibacterium   | g Malassezia                   | 0.069660179  | 0.059772619 | 0.412830947 |
| g Mogibacterium   | g unclassified Fungi           | 0.013360821  | 0.718372639 | 0.903667971 |
| g Mogibacterium   | g Mycosphaerella               | -0.024998446 | 0.499782464 | 0.791370491 |
| g Mogibacterium   | g Simplicillium                | 0.04355001   | 0.239592852 | 0.623263007 |
| g Mogibacterium   | g unclassified Cordycipitaceae | 0.056550231  | 0.126622999 | 0.5134831   |
| g Mogibacterium   | g unidentified                 | 0.00865629   | 0.815261318 | 0.934957602 |
| g S5-A14a         | g Verticillium                 | 0.063950833  | 0.084015233 | 0.457565204 |
| g S5-A14a         | g unclassified Tremellomycetes | -0.111321034 | 0.002578192 | 0.097090507 |
| g S5-A14a         | g Candida                      | 0.036422661  | 0.325410128 | 0.682100836 |
| g S5-A14a         | g Cladosporium                 | -0.012098951 | 0.7439919   | 0.909574751 |
| g S5-A14a         | g Debaryomyces                 | 0.057205088  | 0.122280162 | 0.506637511 |
| g S5-A14a         | g Aspergillus                  | 0.045151706  | 0.22273037  | 0.609972249 |
| g S5-A14a         | g Kazachstania                 | -0.02563893  | 0.488857241 | 0.783941094 |

|                   |                                |              |             |             |
|-------------------|--------------------------------|--------------|-------------|-------------|
| g S5-A14a         | g Malassezia                   | 0.016174101  | 0.662416297 | 0.877088245 |
| g S5-A14a         | g unclassified Fungi           | 0.011369144  | 0.758941133 | 0.913249382 |
| g S5-A14a         | g Mycosphaerella               | 0.038941538  | 0.293047433 | 0.662256281 |
| g S5-A14a         | g Simplicillium                | 0.045832607  | 0.215824885 | 0.603186168 |
| g S5-A14a         | g unclassified Cordycipitaceae | 0.015777794  | 0.670194641 | 0.881120344 |
| g S5-A14a         | g unidentified                 | 0.024403812  | 0.51004019  | 0.798892628 |
| g MGYG-HGUT-04171 | g Verticillium                 | 0.01318603   | 0.721903307 | 0.905652732 |
| g MGYG-HGUT-04171 | g unclassified Tremellomycetes | -0.083512762 | 0.023944599 | 0.287933808 |
| g MGYG-HGUT-04171 | g Candida                      | -0.064776135 | 0.080084782 | 0.45101344  |
| g MGYG-HGUT-04171 | g Cladosporium                 | -0.004558156 | 0.902084416 | 0.966636316 |
| g MGYG-HGUT-04171 | g Debaryomyces                 | -0.15776266  | 1.83E-05    | 0.008790035 |
| g MGYG-HGUT-04171 | g Aspergillus                  | 0.046473993  | 0.209462155 | 0.598738121 |
| g MGYG-HGUT-04171 | g Kazachstania                 | -0.028911529 | 0.435092633 | 0.754902482 |
| g MGYG-HGUT-04171 | g Malassezia                   | -0.001821378 | 0.960791484 | 0.985565673 |
| g MGYG-HGUT-04171 | g unclassified Fungi           | 0.098431082  | 0.007740191 | 0.169228729 |
| g MGYG-HGUT-04171 | g Mycosphaerella               | -0.001842782 | 0.960331092 | 0.985188911 |
| g MGYG-HGUT-04171 | g Simplicillium                | -0.052002384 | 0.160160088 | 0.557138085 |
| g MGYG-HGUT-04171 | g unclassified Cordycipitaceae | 0.010694162  | 0.772847976 | 0.918101184 |
| g MGYG-HGUT-04171 | g unidentified                 | 0.034036085  | 0.358134566 | 0.709165414 |
| g Eubacterium M   | g Verticillium                 | 0.05413484   | 0.143683168 | 0.538689764 |
| g Eubacterium M   | g unclassified Tremellomycetes | -0.070078353 | 0.058252162 | 0.408498594 |
| g Eubacterium M   | g Candida                      | -0.014365852 | 0.698189939 | 0.895302916 |
| g Eubacterium M   | g Cladosporium                 | 0.006538066  | 0.85992539  | 0.952651851 |
| g Eubacterium M   | g Debaryomyces                 | -0.058298702 | 0.11528764  | 0.498170056 |
| g Eubacterium M   | g Aspergillus                  | 0.051924873  | 0.160784785 | 0.557764638 |
| g Eubacterium M   | g Kazachstania                 | -0.047875893 | 0.196029263 | 0.585259221 |
| g Eubacterium M   | g Malassezia                   | -0.00281123  | 0.939516679 | 0.978000513 |
| g Eubacterium M   | g unclassified Fungi           | 0.060559605  | 0.101829014 | 0.480456307 |
| g Eubacterium M   | g Mycosphaerella               | -0.022300425 | 0.547187525 | 0.816368923 |
| g Eubacterium M   | g Simplicillium                | -0.019429641 | 0.599951729 | 0.847048625 |
| g Eubacterium M   | g unclassified Cordycipitaceae | 0.070152799  | 0.057984875 | 0.407963088 |
| g Eubacterium M   | g unidentified                 | 0.002323162  | 0.950002259 | 0.982348232 |
| g MGYG-HGUT-04123 | g Verticillium                 | 0.013475111  | 0.716067293 | 0.903168431 |
| g MGYG-HGUT-04123 | g unclassified Tremellomycetes | -0.030920081 | 0.403855367 | 0.736936858 |
| g MGYG-HGUT-04123 | g Candida                      | -0.075113292 | 0.04233294  | 0.358790655 |
| g MGYG-HGUT-04123 | g Cladosporium                 | 0.028285641  | 0.445103713 | 0.76170364  |
| g MGYG-HGUT-04123 | g Debaryomyces                 | -0.023667016 | 0.522901115 | 0.805904399 |
| g MGYG-HGUT-04123 | g Aspergillus                  | -0.012854855 | 0.728609044 | 0.907012052 |
| g MGYG-HGUT-04123 | g Kazachstania                 | 0.046010256  | 0.214048811 | 0.601852711 |
| g MGYG-HGUT-04123 | g Malassezia                   | 0.045717174  | 0.21698461  | 0.604563228 |
| g MGYG-HGUT-04123 | g unclassified Fungi           | -0.044841925 | 0.22592377  | 0.612692296 |
| g MGYG-HGUT-04123 | g Mycosphaerella               | -0.043135274 | 0.244101886 | 0.627877043 |
| g MGYG-HGUT-04123 | g Simplicillium                | 0.032312948  | 0.383002054 | 0.723866358 |
| g MGYG-HGUT-04123 | g unclassified Cordycipitaceae | 0.054319088  | 0.142322789 | 0.537267149 |
| g MGYG-HGUT-04123 | g unidentified                 | -0.046489074 | 0.209314191 | 0.598476835 |
| g MGYG-HGUT-01191 | g Verticillium                 | 0.049386575  | 0.182271283 | 0.575010893 |
| g MGYG-HGUT-01191 | g unclassified Tremellomycetes | -0.062444696 | 0.091588858 | 0.470392034 |
| g MGYG-HGUT-01191 | g Candida                      | -0.010859098 | 0.769442844 | 0.917270973 |
| g MGYG-HGUT-01191 | g Cladosporium                 | -0.011570148 | 0.754814559 | 0.911600966 |
| g MGYG-HGUT-01191 | g Debaryomyces                 | -0.060983064 | 0.099452905 | 0.478320958 |
| g MGYG-HGUT-01191 | g Aspergillus                  | 0.046363496  | 0.210548544 | 0.599253547 |
| g MGYG-HGUT-01191 | g Kazachstania                 | -0.050093331 | 0.176085775 | 0.571420949 |
| g MGYG-HGUT-01191 | g Malassezia                   | 0.046100926  | 0.213146391 | 0.600680647 |
| g MGYG-HGUT-01191 | g unclassified Fungi           | 0.014420735  | 0.697093746 | 0.895302916 |
| g MGYG-HGUT-01191 | g Mycosphaerella               | -0.021691868 | 0.558178947 | 0.824490455 |
| g MGYG-HGUT-01191 | g Simplicillium                | 0.022374619  | 0.545854825 | 0.816281885 |
| g MGYG-HGUT-01191 | g unclassified Cordycipitaceae | 0.016825655  | 0.649707149 | 0.870052588 |
| g MGYG-HGUT-01191 | g unidentified                 | 0.020313473  | 0.583463762 | 0.83909415  |
| g MGYG-HGUT-00103 | g Verticillium                 | 0.040371526  | 0.275668258 | 0.653142958 |
| g MGYG-HGUT-00103 | g unclassified Tremellomycetes | -0.033563789 | 0.364847525 | 0.713953478 |
| g MGYG-HGUT-00103 | g Candida                      | 0.000111471  | 0.997599422 | 0.998643711 |
| g MGYG-HGUT-00103 | g Cladosporium                 | 0.050779803  | 0.17022866  | 0.564916697 |
| g MGYG-HGUT-00103 | g Debaryomyces                 | -0.121645264 | 0.00098232  | 0.05906749  |
| g MGYG-HGUT-00103 | g Aspergillus                  | 0.064413702  | 0.081792088 | 0.453628865 |
| g MGYG-HGUT-00103 | g Kazachstania                 | -0.02686927  | 0.468235804 | 0.773111449 |
| g MGYG-HGUT-00103 | g Malassezia                   | 0.053942133  | 0.145116627 | 0.540332211 |
| g MGYG-HGUT-00103 | g unclassified Fungi           | 0.022663371  | 0.540683468 | 0.815420595 |
| g MGYG-HGUT-00103 | g Mycosphaerella               | 0.014749784  | 0.690534903 | 0.892547431 |
| g MGYG-HGUT-00103 | g Simplicillium                | -0.008660417 | 0.815174823 | 0.934957602 |
| g MGYG-HGUT-00103 | g unclassified Cordycipitaceae | 0.060307383  | 0.103265579 | 0.483295494 |
| g MGYG-HGUT-00103 | g unidentified                 | 0.036019893  | 0.330792295 | 0.686878237 |
| g MGYG-HGUT-00126 | g Verticillium                 | 0.012812247  | 0.729473292 | 0.907190784 |
| g MGYG-HGUT-00126 | g unclassified Tremellomycetes | -0.003924969 | 0.915631355 | 0.971437239 |
| g MGYG-HGUT-00126 | g Candida                      | 0.020664054  | 0.576982525 | 0.836262521 |
| g MGYG-HGUT-00126 | g Cladosporium                 | 0.09545749   | 0.0098125   | 0.191675484 |
| g MGYG-HGUT-00126 | g Debaryomyces                 | -0.115332024 | 0.001788202 | 0.083377853 |
| g MGYG-HGUT-00126 | g Aspergillus                  | 0.047872615  | 0.196059919 | 0.585259221 |
| g MGYG-HGUT-00126 | g Kazachstania                 | -0.061249662 | 0.097979752 | 0.477873659 |

|                    |                                |              |             |             |
|--------------------|--------------------------------|--------------|-------------|-------------|
| g MGYG-HGUT-00126  | g Malassezia                   | 0.069777996  | 0.059340955 | 0.412336263 |
| g MGYG-HGUT-00126  | g unclassified Fungi           | 0.013672496  | 0.712091901 | 0.902091837 |
| g MGYG-HGUT-00126  | g Mycosphaerella               | -0.007838994 | 0.832431976 | 0.941418308 |
| g MGYG-HGUT-00126  | g Simplicillium                | -0.015723142 | 0.671270103 | 0.881634123 |
| g MGYG-HGUT-00126  | g unclassified Cordycipitaceae | 0.066363934  | 0.072942711 | 0.443311605 |
| g MGYG-HGUT-00126  | g unidentified                 | -0.003452804 | 0.925749428 | 0.974172444 |
| g MGYG-HGUT-00367  | g Verticillium                 | 0.044890263  | 0.225423336 | 0.612119514 |
| g MGYG-HGUT-00367  | g unclassified Tremellomycetes | -0.026846936 | 0.468605804 | 0.77312422  |
| g MGYG-HGUT-00367  | g Candida                      | -0.062472974 | 0.091441778 | 0.470392034 |
| g MGYG-HGUT-00367  | g Cladosporium                 | 0.062270778  | 0.092497606 | 0.471664958 |
| g MGYG-HGUT-00367  | g Debaryomyces                 | -0.097102494 | 0.008612138 | 0.177648425 |
| g MGYG-HGUT-00367  | g Aspergillus                  | 0.053389705  | 0.149286469 | 0.545678967 |
| g MGYG-HGUT-00367  | g Kazachstania                 | -0.049568533 | 0.180663635 | 0.575010893 |
| g MGYG-HGUT-00367  | g Malassezia                   | 0.023648045  | 0.523234446 | 0.806065936 |
| g MGYG-HGUT-00367  | g unclassified Fungi           | 0.044431197  | 0.230207875 | 0.615133665 |
| g MGYG-HGUT-00367  | g Mycosphaerella               | 0.013571466  | 0.714125705 | 0.902852832 |
| g MGYG-HGUT-00367  | g Simplicillium                | -0.019474129 | 0.599116791 | 0.846523771 |
| g MGYG-HGUT-00367  | g unclassified Cordycipitaceae | 0.065941241  | 0.074791217 | 0.444519981 |
| g MGYG-HGUT-00367  | g unidentified                 | 0.018226252  | 0.622732813 | 0.856146372 |
| g Eubacterium A    | g Verticillium                 | 0.039197893  | 0.289879038 | 0.660061436 |
| g Eubacterium A    | g unclassified Tremellomycetes | -0.025523459 | 0.490817382 | 0.785245012 |
| g Eubacterium A    | g Candida                      | 0.017342443  | 0.639698343 | 0.86388896  |
| g Eubacterium A    | g Cladosporium                 | -0.001429003 | 0.96923333  | 0.988740749 |
| g Eubacterium A    | g Debaryomyces                 | 0.029123341  | 0.431734297 | 0.753274911 |
| g Eubacterium A    | g Aspergillus                  | -0.050080134 | 0.176199826 | 0.571420949 |
| g Eubacterium A    | g Kazachstania                 | 0.061570439  | 0.096230341 | 0.476824683 |
| g Eubacterium A    | g Malassezia                   | 0.053720991  | 0.14677504  | 0.54128199  |
| g Eubacterium A    | g unclassified Fungi           | 0.006128784  | 0.868611855 | 0.955273867 |
| g Eubacterium A    | g Mycosphaerella               | 0.054745265  | 0.139213991 | 0.533656308 |
| g Eubacterium A    | g Simplicillium                | 0.041799893  | 0.259022946 | 0.637931914 |
| g Eubacterium A    | g unclassified Cordycipitaceae | 0.073761245  | 0.046197205 | 0.373745279 |
| g Eubacterium A    | g unidentified                 | 0.004649159  | 0.900139658 | 0.96604016  |
| g MGYG-HGUT-04061  | g Verticillium                 | -0.012839278 | 0.728924961 | 0.907012052 |
| g MGYG-HGUT-04061  | g unclassified Tremellomycetes | -0.002757445 | 0.940671719 | 0.978298588 |
| g MGYG-HGUT-04061  | g Candida                      | -0.008987426 | 0.80832907  | 0.933453782 |
| g MGYG-HGUT-04061  | g Cladosporium                 | 0.028762178  | 0.437469658 | 0.753655273 |
| g MGYG-HGUT-04061  | g Debaryomyces                 | -0.079295947 | 0.032062323 | 0.323266606 |
| g MGYG-HGUT-04061  | g Aspergillus                  | 0.061313438  | 0.097629933 | 0.477597322 |
| g MGYG-HGUT-04061  | g Kazachstania                 | -0.029021748 | 0.433343212 | 0.754104067 |
| g MGYG-HGUT-04061  | g Malassezia                   | 0.005837636  | 0.874800784 | 0.957673757 |
| g MGYG-HGUT-04061  | g unclassified Fungi           | -0.000222887 | 0.99520005  | 0.997745801 |
| g MGYG-HGUT-04061  | g Mycosphaerella               | -0.025703338 | 0.487765741 | 0.783353899 |
| g MGYG-HGUT-04061  | g Simplicillium                | 0.026524208  | 0.473970323 | 0.775471198 |
| g MGYG-HGUT-04061  | g unclassified Cordycipitaceae | 0.006602191  | 0.858565931 | 0.952142599 |
| g MGYG-HGUT-04061  | g unidentified                 | 0.017883734  | 0.629284711 | 0.859818244 |
| g MGYG-HGUT-03210  | g Verticillium                 | -0.002336792 | 0.949709298 | 0.982291446 |
| g MGYG-HGUT-03210  | g unclassified Tremellomycetes | 0.002373471  | 0.948920995 | 0.981955991 |
| g MGYG-HGUT-03210  | g Candida                      | 0.007091417  | 0.848208296 | 0.948609193 |
| g MGYG-HGUT-03210  | g Cladosporium                 | 0.010401443  | 0.778901958 | 0.921314364 |
| g MGYG-HGUT-03210  | g Debaryomyces                 | -0.125564859 | 0.000667567 | 0.047731026 |
| g MGYG-HGUT-03210  | g Aspergillus                  | 0.022107107  | 0.550667513 | 0.819227277 |
| g MGYG-HGUT-03210  | g Kazachstania                 | -0.108924647 | 0.003190775 | 0.111269104 |
| g MGYG-HGUT-03210  | g Malassezia                   | 0.01210705   | 0.743826531 | 0.909574751 |
| g MGYG-HGUT-03210  | g unclassified Fungi           | 0.05593964   | 0.130779349 | 0.517833494 |
| g MGYG-HGUT-03210  | g Mycosphaerella               | -0.061397019 | 0.097172993 | 0.477459115 |
| g MGYG-HGUT-03210  | g Simplicillium                | 0.048727087  | 0.188186796 | 0.578220871 |
| g MGYG-HGUT-03210  | g unclassified Cordycipitaceae | 0.003086886  | 0.933599045 | 0.97650935  |
| g MGYG-HGUT-03210  | g unidentified                 | 0.050258674  | 0.174661511 | 0.569927454 |
| g Intestinibacter  | g Verticillium                 | -0.01136203  | 0.759087324 | 0.91332144  |
| g Intestinibacter  | g unclassified Tremellomycetes | -0.077775456 | 0.03551802  | 0.335601849 |
| g Intestinibacter  | g Candida                      | -0.066121965 | 0.07399626  | 0.444193078 |
| g Intestinibacter  | g Cladosporium                 | 0.081752936  | 0.027086207 | 0.30473778  |
| g Intestinibacter  | g Debaryomyces                 | -0.016159083 | 0.66271041  | 0.877367891 |
| g Intestinibacter  | g Aspergillus                  | 0.024069613  | 0.515853166 | 0.802695096 |
| g Intestinibacter  | g Kazachstania                 | 0.006425267  | 0.862317764 | 0.953015155 |
| g Intestinibacter  | g Malassezia                   | -0.030560844 | 0.409341732 | 0.740580307 |
| g Intestinibacter  | g unclassified Fungi           | -0.017113062 | 0.644132908 | 0.86719597  |
| g Intestinibacter  | g Mycosphaerella               | -0.019187777 | 0.604500106 | 0.849300857 |
| g Intestinibacter  | g Simplicillium                | 0.003840075  | 0.917449602 | 0.971437239 |
| g Intestinibacter  | g unclassified Cordycipitaceae | 0.036971298  | 0.318170721 | 0.676223819 |
| g Intestinibacter  | g unidentified                 | -0.026155959 | 0.48013244  | 0.780189053 |
| g Terrisporobacter | g Verticillium                 | -0.053088307 | 0.15159964  | 0.548829076 |
| g Terrisporobacter | g unclassified Tremellomycetes | -0.004241944 | 0.908846424 | 0.969000455 |
| g Terrisporobacter | g Candida                      | -0.072048615 | 0.051513557 | 0.388828673 |
| g Terrisporobacter | g Cladosporium                 | 0.031561265  | 0.394172888 | 0.730848211 |
| g Terrisporobacter | g Debaryomyces                 | 0.019725811  | 0.594403225 | 0.844389068 |
| g Terrisporobacter | g Aspergillus                  | 0.06498698   | 0.079104927 | 0.45101344  |
| g Terrisporobacter | g Kazachstania                 | 0.05407661   | 0.144115164 | 0.538704729 |

|                      |                                |              |             |             |
|----------------------|--------------------------------|--------------|-------------|-------------|
| g Terrisporobacter   | g Malassezia                   | -0.004034854 | 0.913278515 | 0.970799924 |
| g Terrisporobacter   | g unclassified Fungi           | -0.046201693 | 0.212146691 | 0.600680647 |
| g Terrisporobacter   | g Mycosphaerella               | -0.001627346 | 0.964965528 | 0.987454329 |
| g Terrisporobacter   | g Simplicillium                | 0.004214843  | 0.909426269 | 0.96913885  |
| g Terrisporobacter   | g unclassified Cordycipitaceae | 0.016868369  | 0.648877451 | 0.8699978   |
| g Terrisporobacter   | g unidentified                 | -0.017862126 | 0.629699034 | 0.859818244 |
| g Romboutsia         | g Verticillium                 | -0.049581856 | 0.180546336 | 0.575010893 |
| g Romboutsia         | g unclassified Tremellomycetes | 0.002784102  | 0.940099252 | 0.978000513 |
| g Romboutsia         | g Candida                      | -0.084636229 | 0.022108303 | 0.282747713 |
| g Romboutsia         | g Cladosporium                 | 0.009834934  | 0.790656205 | 0.926547505 |
| g Romboutsia         | g Debaryomyces                 | 0.011743544  | 0.751260375 | 0.910387945 |
| g Romboutsia         | g Aspergillus                  | 0.135271709  | 0.000244498 | 0.026950761 |
| g Romboutsia         | g Kazachstania                 | 0.032489572  | 0.380405585 | 0.722837319 |
| g Romboutsia         | g Malassezia                   | -0.094840145 | 0.010300022 | 0.1959478   |
| g Romboutsia         | g unclassified Fungi           | -0.014162075 | 0.702265496 | 0.897212331 |
| g Romboutsia         | g Mycosphaerella               | 0.005813107  | 0.875322558 | 0.957673757 |
| g Romboutsia         | g Simplicillium                | 0.050462451  | 0.172918002 | 0.56685821  |
| g Romboutsia         | g unclassified Cordycipitaceae | -0.0138786   | 0.707949231 | 0.900771504 |
| g Romboutsia         | g unidentified                 | -0.006843412 | 0.853455773 | 0.949660251 |
| g Clostridioides     | g Verticillium                 | -0.018889196 | 0.61013629  | 0.851291399 |
| g Clostridioides     | g unclassified Tremellomycetes | 0.003119038  | 0.932909056 | 0.976416726 |
| g Clostridioides     | g Candida                      | -0.066684337 | 0.071566532 | 0.442098997 |
| g Clostridioides     | g Cladosporium                 | 0.058813831  | 0.112104549 | 0.495063318 |
| g Clostridioides     | g Debaryomyces                 | 0.045010263  | 0.224184421 | 0.611737891 |
| g Clostridioides     | g Aspergillus                  | 0.017640597  | 0.63395336  | 0.861635763 |
| g Clostridioides     | g Kazachstania                 | 0.020164875  | 0.586221082 | 0.840615467 |
| g Clostridioides     | g Malassezia                   | 0.012601185  | 0.733759512 | 0.907315107 |
| g Clostridioides     | g unclassified Fungi           | -0.058288478 | 0.11535153  | 0.498170056 |
| g Clostridioides     | g Mycosphaerella               | -0.045836204 | 0.215788824 | 0.603186168 |
| g Clostridioides     | g Simplicillium                | 0.012668267  | 0.7323963   | 0.907315107 |
| g Clostridioides     | g unclassified Cordycipitaceae | 0.060191014  | 0.103933769 | 0.483414571 |
| g Clostridioides     | g unidentified                 | -0.079563422 | 0.031485161 | 0.320310572 |
| g GCA-900066495      | g Verticillium                 | -0.086385871 | 0.019491925 | 0.26949661  |
| g GCA-900066495      | g unclassified Tremellomycetes | -0.005153591 | 0.889370984 | 0.962882845 |
| g GCA-900066495      | g Candida                      | -0.054246279 | 0.142859185 | 0.537984305 |
| g GCA-900066495      | g Cladosporium                 | -0.028214564 | 0.446248819 | 0.761832544 |
| g GCA-900066495      | g Debaryomyces                 | 0.060888231  | 0.099981159 | 0.478320958 |
| g GCA-900066495      | g Aspergillus                  | 0.125924004  | 0.000643996 | 0.046998384 |
| g GCA-900066495      | g Kazachstania                 | 0.050620415  | 0.171575426 | 0.565255978 |
| g GCA-900066495      | g Malassezia                   | -0.075706167 | 0.040726573 | 0.353252944 |
| g GCA-900066495      | g unclassified Fungi           | -0.047843276 | 0.196334468 | 0.585259221 |
| g GCA-900066495      | g Mycosphaerella               | -0.021057157 | 0.569755701 | 0.831953372 |
| g GCA-900066495      | g Simplicillium                | 0.050802843  | 0.170034633 | 0.564843333 |
| g GCA-900066495      | g unclassified Cordycipitaceae | -0.05859702  | 0.113435734 | 0.496972931 |
| g GCA-900066495      | g unidentified                 | -0.009138229 | 0.805176998 | 0.931596653 |
| g Clostridium U      | g Verticillium                 | -0.07426824  | 0.044714781 | 0.367648298 |
| g Clostridium U      | g unclassified Tremellomycetes | 0.027540556  | 0.457190474 | 0.766960938 |
| g Clostridium U      | g Candida                      | 0.007199771  | 0.845917753 | 0.947820248 |
| g Clostridium U      | g Cladosporium                 | 0.027553158  | 0.456984535 | 0.766960938 |
| g Clostridium U      | g Debaryomyces                 | 0.041657546  | 0.260649885 | 0.638638484 |
| g Clostridium U      | g Aspergillus                  | -0.001907099 | 0.958947765 | 0.984847119 |
| g Clostridium U      | g Kazachstania                 | 0.040038676  | 0.279649468 | 0.656601603 |
| g Clostridium U      | g Malassezia                   | -0.090226559 | 0.014676668 | 0.234251137 |
| g Clostridium U      | g unclassified Fungi           | -0.01424268  | 0.700652364 | 0.896855366 |
| g Clostridium U      | g Mycosphaerella               | -0.005313762 | 0.885955807 | 0.96210924  |
| g Clostridium U      | g Simplicillium                | 0.017533097  | 0.636022223 | 0.863201672 |
| g Clostridium U      | g unclassified Cordycipitaceae | -0.014736821 | 0.690792855 | 0.892548229 |
| g Clostridium U      | g unidentified                 | 0.008038063  | 0.828242019 | 0.939989934 |
| g Peptostreptococcus | g Verticillium                 | -0.048309709 | 0.19200295  | 0.581297022 |
| g Peptostreptococcus | g unclassified Tremellomycetes | -0.029594399 | 0.42431952  | 0.747983848 |
| g Peptostreptococcus | g Candida                      | -0.048902753 | 0.186597455 | 0.5772845   |
| g Peptostreptococcus | g Cladosporium                 | 0.062306715  | 0.092309239 | 0.471664958 |
| g Peptostreptococcus | g Debaryomyces                 | 0.003057733  | 0.934224717 | 0.976739727 |
| g Peptostreptococcus | g Aspergillus                  | 0.044257515  | 0.232036708 | 0.617517742 |
| g Peptostreptococcus | g Kazachstania                 | 0.059013747  | 0.110888018 | 0.494471808 |
| g Peptostreptococcus | g Malassezia                   | -0.033651929 | 0.363588822 | 0.713515619 |
| g Peptostreptococcus | g unclassified Fungi           | -0.051375626 | 0.16526415  | 0.562434723 |
| g Peptostreptococcus | g Mycosphaerella               | -0.078232029 | 0.034448493 | 0.331093505 |
| g Peptostreptococcus | g Simplicillium                | -0.010023382 | 0.786740766 | 0.92492954  |
| g Peptostreptococcus | g unclassified Cordycipitaceae | 0.031123537  | 0.400767704 | 0.735790931 |
| g Peptostreptococcus | g unidentified                 | -0.085894118 | 0.020198514 | 0.273942808 |
| g GCA-900066935      | g Verticillium                 | -0.061382193 | 0.097253925 | 0.477459115 |
| g GCA-900066935      | g unclassified Tremellomycetes | -0.00551841  | 0.881595356 | 0.960370811 |
| g GCA-900066935      | g Candida                      | -0.048008598 | 0.194791109 | 0.584265492 |
| g GCA-900066935      | g Cladosporium                 | -0.047221877 | 0.202215461 | 0.591443895 |
| g GCA-900066935      | g Debaryomyces                 | 0.036713444  | 0.321559953 | 0.678513942 |
| g GCA-900066935      | g Aspergillus                  | 0.111194391  | 0.002607666 | 0.097852205 |
| g GCA-900066935      | g Kazachstania                 | 0.061777985  | 0.095111811 | 0.474527669 |



|                    |                                |              |             |             |
|--------------------|--------------------------------|--------------|-------------|-------------|
| g GCA-900066935    | g Malassezia                   | -0.079635803 | 0.031330514 | 0.319842959 |
| g GCA-900066935    | g unclassified Fungi           | -0.046579983 | 0.208423891 | 0.597903264 |
| g GCA-900066935    | g Mycosphaerella               | -0.015165318 | 0.682285233 | 0.887406875 |
| g GCA-900066935    | g Simplicillium                | 0.075908348  | 0.040190695 | 0.350685903 |
| g GCA-900066935    | g unclassified Cordycipitaceae | -0.017306203 | 0.640398111 | 0.864117891 |
| g GCA-900066935    | g unidentified                 | 0.005153765  | 0.889367292 | 0.962882845 |
| g Paeniclostridium | g Verticillium                 | -0.071755274 | 0.05247354  | 0.393254252 |
| g Paeniclostridium | g unclassified Tremellomycetes | -0.000434771 | 0.990637208 | 0.996570295 |
| g Paeniclostridium | g Candida                      | -0.025336722 | 0.493996167 | 0.787335309 |
| g Paeniclostridium | g Cladosporium                 | 0.006238442  | 0.866282916 | 0.954995918 |
| g Paeniclostridium | g Debaryomyces                 | 0.053068542  | 0.151752277 | 0.548993338 |
| g Paeniclostridium | g Aspergillus                  | 0.073298901  | 0.047584863 | 0.377185783 |
| g Paeniclostridium | g Kazachstania                 | 0.058827772  | 0.112019375 | 0.495063318 |
| g Paeniclostridium | g Malassezia                   | -0.063180161 | 0.087824822 | 0.465495179 |
| g Paeniclostridium | g unclassified Fungi           | -0.038067207 | 0.304027576 | 0.670057703 |
| g Paeniclostridium | g Mycosphaerella               | -0.002670997 | 0.942528435 | 0.978978788 |
| g Paeniclostridium | g Simplicillium                | 0.029887802  | 0.419738953 | 0.745998926 |
| g Paeniclostridium | g unclassified Cordycipitaceae | -0.025975558 | 0.483167039 | 0.780449413 |
| g Paeniclostridium | g unidentified                 | -0.021070937 | 0.56950316  | 0.831953372 |
| g Paraclostridium  | g Verticillium                 | -0.067005652 | 0.070207835 | 0.439536772 |
| g Paraclostridium  | g unclassified Tremellomycetes | 0.008092563  | 0.827095771 | 0.939989934 |
| g Paraclostridium  | g Candida                      | -0.032790903 | 0.376000839 | 0.720152195 |
| g Paraclostridium  | g Cladosporium                 | -0.02252108  | 0.54322875  | 0.816215242 |
| g Paraclostridium  | g Debaryomyces                 | 0.059543284  | 0.107715911 | 0.489543137 |
| g Paraclostridium  | g Aspergillus                  | 0.098363308  | 0.007782683 | 0.169457519 |
| g Paraclostridium  | g Kazachstania                 | 0.083546734  | 0.023887194 | 0.28793808  |
| g Paraclostridium  | g Malassezia                   | -0.081375056 | 0.027805282 | 0.307456108 |
| g Paraclostridium  | g unclassified Fungi           | -0.074860412 | 0.043034207 | 0.361614982 |
| g Paraclostridium  | g Mycosphaerella               | 0.003309064  | 0.928832095 | 0.974673427 |
| g Paraclostridium  | g Simplicillium                | 0.011525972  | 0.755720899 | 0.911989902 |
| g Paraclostridium  | g unclassified Cordycipitaceae | -0.029967071 | 0.418506405 | 0.744941528 |
| g Paraclostridium  | g unidentified                 | 0.004545564  | 0.902353555 | 0.966636316 |
| g MGYG-HGUT-02072  | g Verticillium                 | 0.025758883  | 0.48682548  | 0.783154405 |
| g MGYG-HGUT-02072  | g unclassified Tremellomycetes | -0.066964615 | 0.070380179 | 0.439536772 |
| g MGYG-HGUT-02072  | g Candida                      | -0.020702568 | 0.576272581 | 0.836045579 |
| g MGYG-HGUT-02072  | g Cladosporium                 | -7.50E-05    | 0.998383777 | 0.998950182 |
| g MGYG-HGUT-02072  | g Debaryomyces                 | -0.121723793 | 0.000974853 | 0.05906749  |
| g MGYG-HGUT-02072  | g Aspergillus                  | 0.101577799  | 0.00598188  | 0.148686802 |
| g MGYG-HGUT-02072  | g Kazachstania                 | -0.084930567 | 0.021647907 | 0.2798591   |
| g MGYG-HGUT-02072  | g Malassezia                   | 0.001520336  | 0.967267982 | 0.988549475 |
| g MGYG-HGUT-02072  | g unclassified Fungi           | 0.023872628  | 0.519295477 | 0.804094928 |
| g MGYG-HGUT-02072  | g Mycosphaerella               | 0.033538922  | 0.365203123 | 0.713953478 |
| g MGYG-HGUT-02072  | g Simplicillium                | -0.005194903 | 0.888489929 | 0.962573397 |
| g MGYG-HGUT-02072  | g unclassified Cordycipitaceae | 0.025552177  | 0.490329492 | 0.785111149 |
| g MGYG-HGUT-02072  | g unidentified                 | 0.072514448  | 0.050019247 | 0.385192726 |
| g MGYG-HGUT-01103  | g Verticillium                 | 0.045237157  | 0.221855192 | 0.608362696 |
| g MGYG-HGUT-01103  | g unclassified Tremellomycetes | -0.041587453 | 0.261453597 | 0.639461577 |
| g MGYG-HGUT-01103  | g Candida                      | -0.014905799 | 0.687433133 | 0.890646763 |
| g MGYG-HGUT-01103  | g Cladosporium                 | -0.010559478 | 0.775631812 | 0.919840394 |
| g MGYG-HGUT-01103  | g Debaryomyces                 | -0.149250483 | 5.10E-05    | 0.013389478 |
| g MGYG-HGUT-01103  | g Aspergillus                  | 0.067815411  | 0.066877225 | 0.431258256 |
| g MGYG-HGUT-01103  | g Kazachstania                 | -0.029458966 | 0.426443688 | 0.749727648 |
| g MGYG-HGUT-01103  | g Malassezia                   | 0.014675857  | 0.692006473 | 0.893134834 |
| g MGYG-HGUT-01103  | g unclassified Fungi           | 0.057802187  | 0.118422427 | 0.502487018 |
| g MGYG-HGUT-01103  | g Mycosphaerella               | -0.022227961 | 0.548490712 | 0.817643267 |
| g MGYG-HGUT-01103  | g Simplicillium                | -0.020870554 | 0.573180849 | 0.833846542 |
| g MGYG-HGUT-01103  | g unclassified Cordycipitaceae | 0.04289872   | 0.246700183 | 0.629733759 |
| g MGYG-HGUT-01103  | g unidentified                 | 0.043164377  | 0.243783544 | 0.627821236 |
| g MGYG-HGUT-01823  | g Verticillium                 | 0.079953135  | 0.030660164 | 0.315608804 |
| g MGYG-HGUT-01823  | g unclassified Tremellomycetes | -0.058253087 | 0.115572887 | 0.498339196 |
| g MGYG-HGUT-01823  | g Candida                      | -0.026092868 | 0.481192548 | 0.780189053 |
| g MGYG-HGUT-01823  | g Cladosporium                 | 0.005738252  | 0.876915169 | 0.957972871 |
| g MGYG-HGUT-01823  | g Debaryomyces                 | -0.142413158 | 0.000111753 | 0.018409489 |
| g MGYG-HGUT-01823  | g Aspergillus                  | 0.114069165  | 0.002008997 | 0.084840998 |
| g MGYG-HGUT-01823  | g Kazachstania                 | -0.058511395 | 0.113964874 | 0.497306733 |
| g MGYG-HGUT-01823  | g Malassezia                   | 0.065200769  | 0.07812135  | 0.450222934 |
| g MGYG-HGUT-01823  | g unclassified Fungi           | 0.02659308   | 0.472822689 | 0.775069559 |
| g MGYG-HGUT-01823  | g Mycosphaerella               | 0.038384479  | 0.300012052 | 0.667386268 |
| g MGYG-HGUT-01823  | g Simplicillium                | 0.010052292  | 0.786140549 | 0.924326588 |
| g MGYG-HGUT-01823  | g unclassified Cordycipitaceae | 0.073065654  | 0.048298088 | 0.378604998 |
| g MGYG-HGUT-01823  | g unidentified                 | 0.067418496  | 0.068493184 | 0.43623748  |
| g MGYG-HGUT-03875  | g Verticillium                 | 0.003400619  | 0.926868466 | 0.974172444 |
| g MGYG-HGUT-03875  | g unclassified Tremellomycetes | -0.05514498  | 0.136345887 | 0.527536446 |
| g MGYG-HGUT-03875  | g Candida                      | 0.018969399  | 0.608620044 | 0.851291399 |
| g MGYG-HGUT-03875  | g Cladosporium                 | 0.010013063  | 0.786955026 | 0.925075215 |
| g MGYG-HGUT-03875  | g Debaryomyces                 | -0.110166318 | 0.002858547 | 0.102888231 |
| g MGYG-HGUT-03875  | g Aspergillus                  | 0.012817585  | 0.72936501  | 0.907162734 |
| g MGYG-HGUT-03875  | g Kazachstania                 | -0.117315349 | 0.001485986 | 0.074173153 |

|   |                 |   |                              |              |             |             |
|---|-----------------|---|------------------------------|--------------|-------------|-------------|
| g | MGYG-HGUT-03875 | g | Malassezia                   | 0.042422584  | 0.25198853  | 0.633533529 |
| g | MGYG-HGUT-03875 | g | unclassified Fungi           | -0.012998746 | 0.725692906 | 0.906885231 |
| g | MGYG-HGUT-03875 | g | Mycosphaerella               | -0.008352211 | 0.821639877 | 0.937928067 |
| g | MGYG-HGUT-03875 | g | Simplicillium                | -0.063049842 | 0.088482555 | 0.465955266 |
| g | MGYG-HGUT-03875 | g | unclassified Cordycipitaceae | 0.03694968   | 0.318453962 | 0.676223819 |
| g | MGYG-HGUT-03875 | g | unidentified                 | 0.029717781  | 0.422389755 | 0.746980426 |
| g | MGYG-HGUT-03417 | g | Verticillium                 | 0.025972019  | 0.483226664 | 0.780449413 |
| g | MGYG-HGUT-03417 | g | unclassified Tremellomycetes | -0.044914438 | 0.225173356 | 0.612068957 |
| g | MGYG-HGUT-03417 | g | Candida                      | -0.022852797 | 0.537304308 | 0.813920136 |
| g | MGYG-HGUT-03417 | g | Cladosporium                 | 0.026789499  | 0.469558088 | 0.77312758  |
| g | MGYG-HGUT-03417 | g | Debaryomyces                 | -0.115973462 | 0.001684792 | 0.080765002 |
| g | MGYG-HGUT-03417 | g | Aspergillus                  | 0.057724169  | 0.11892101  | 0.502765534 |
| g | MGYG-HGUT-03417 | g | Kazachstania                 | -0.030178092 | 0.415235654 | 0.743848203 |
| g | MGYG-HGUT-03417 | g | Malassezia                   | 0.010668574  | 0.773376654 | 0.91840105  |
| g | MGYG-HGUT-03417 | g | unclassified Fungi           | -0.022317322 | 0.54688387  | 0.816368923 |
| g | MGYG-HGUT-03417 | g | Mycosphaerella               | 0.000736611  | 0.984137751 | 0.993545315 |
| g | MGYG-HGUT-03417 | g | Simplicillium                | -0.039606927 | 0.284871444 | 0.658096791 |
| g | MGYG-HGUT-03417 | g | unclassified Cordycipitaceae | 0.059933697  | 0.10542346  | 0.486308217 |
| g | MGYG-HGUT-03417 | g | unidentified                 | 0.00195284   | 0.957964049 | 0.984847119 |
| g | MGYG-HGUT-04044 | g | Verticillium                 | 0.032391627  | 0.381844096 | 0.723098466 |
| g | MGYG-HGUT-04044 | g | unclassified Tremellomycetes | -0.016911168 | 0.648046559 | 0.86959532  |
| g | MGYG-HGUT-04044 | g | Candida                      | -0.042328912 | 0.25303815  | 0.634063392 |
| g | MGYG-HGUT-04044 | g | Cladosporium                 | 0.018304997  | 0.621230717 | 0.856123107 |
| g | MGYG-HGUT-04044 | g | Debaryomyces                 | -0.119283677 | 0.001233157 | 0.067612788 |
| g | MGYG-HGUT-04044 | g | Aspergillus                  | 0.069404794  | 0.060717237 | 0.412830947 |
| g | MGYG-HGUT-04044 | g | Kazachstania                 | -0.084675371 | 0.022046592 | 0.282696471 |
| g | MGYG-HGUT-04044 | g | Malassezia                   | 0.043285118  | 0.242465959 | 0.626487849 |
| g | MGYG-HGUT-04044 | g | unclassified Fungi           | 0.004229933  | 0.909103402 | 0.969087559 |
| g | MGYG-HGUT-04044 | g | Mycosphaerella               | -0.031718318 | 0.391822787 | 0.730055982 |
| g | MGYG-HGUT-04044 | g | Simplicillium                | 0.041334499  | 0.264368271 | 0.642342032 |
| g | MGYG-HGUT-04044 | g | unclassified Cordycipitaceae | 0.036389048  | 0.32585712  | 0.682100836 |
| g | MGYG-HGUT-04044 | g | unidentified                 | 0.061283498  | 0.097794037 | 0.477597322 |
| g | MGYG-HGUT-01658 | g | Verticillium                 | 0.010813022  | 0.770393649 | 0.917329312 |
| g | MGYG-HGUT-01658 | g | unclassified Tremellomycetes | -0.056336838 | 0.12806376  | 0.51521926  |
| g | MGYG-HGUT-01658 | g | Candida                      | -0.01580004  | 0.669757078 | 0.880856251 |
| g | MGYG-HGUT-01658 | g | Cladosporium                 | 0.012061705  | 0.744752582 | 0.909574751 |
| g | MGYG-HGUT-01658 | g | Debaryomyces                 | -0.116220789 | 0.001646407 | 0.079918721 |
| g | MGYG-HGUT-01658 | g | Aspergillus                  | 0.096651417  | 0.008927514 | 0.180632805 |
| g | MGYG-HGUT-01658 | g | Kazachstania                 | -0.085366443 | 0.020981425 | 0.277879145 |
| g | MGYG-HGUT-01658 | g | Malassezia                   | 0.009168535  | 0.804543914 | 0.931596653 |
| g | MGYG-HGUT-01658 | g | unclassified Fungi           | 0.053458997  | 0.148758487 | 0.544881381 |
| g | MGYG-HGUT-01658 | g | Mycosphaerella               | 0.006608936  | 0.858422954 | 0.952142599 |
| g | MGYG-HGUT-01658 | g | Simplicillium                | 0.016874083  | 0.648766508 | 0.8699978   |
| g | MGYG-HGUT-01658 | g | unclassified Cordycipitaceae | 0.030233999  | 0.414371646 | 0.742882112 |
| g | MGYG-HGUT-01658 | g | unidentified                 | 0.08058032   | 0.029371356 | 0.312580107 |
| g | MGYG-HGUT-03224 | g | Verticillium                 | 0.073373588  | 0.047358362 | 0.377085167 |
| g | MGYG-HGUT-03224 | g | unclassified Tremellomycetes | -0.043271198 | 0.242617608 | 0.626487849 |
| g | MGYG-HGUT-03224 | g | Candida                      | -0.041136558 | 0.266664584 | 0.644840157 |
| g | MGYG-HGUT-03224 | g | Cladosporium                 | 0.025304495  | 0.494545868 | 0.787688967 |
| g | MGYG-HGUT-03224 | g | Debaryomyces                 | -0.126675915 | 0.000597128 | 0.046422777 |
| g | MGYG-HGUT-03224 | g | Aspergillus                  | 0.078153266  | 0.034631011 | 0.331642857 |
| g | MGYG-HGUT-03224 | g | Kazachstania                 | -0.05679222  | 0.125004439 | 0.510338337 |
| g | MGYG-HGUT-03224 | g | Malassezia                   | 0.002184304  | 0.952987119 | 0.98283236  |
| g | MGYG-HGUT-03224 | g | unclassified Fungi           | 0.087314934  | 0.018215616 | 0.260835786 |
| g | MGYG-HGUT-03224 | g | Mycosphaerella               | 0.065795259  | 0.075438422 | 0.444977361 |
| g | MGYG-HGUT-03224 | g | Simplicillium                | -0.016243928 | 0.661049518 | 0.876375094 |
| g | MGYG-HGUT-03224 | g | unclassified Cordycipitaceae | 0.051329249  | 0.165646623 | 0.562504371 |
| g | MGYG-HGUT-03224 | g | unidentified                 | 0.061684843  | 0.095612489 | 0.475737472 |
| g | MGYG-HGUT-00893 | g | Verticillium                 | 0.018848937  | 0.61089802  | 0.851291399 |
| g | MGYG-HGUT-00893 | g | unclassified Tremellomycetes | -0.040040064 | 0.279632789 | 0.656601603 |
| g | MGYG-HGUT-00893 | g | Candida                      | -0.004371057 | 0.906084579 | 0.968202781 |
| g | MGYG-HGUT-00893 | g | Cladosporium                 | 0.029953611  | 0.418715554 | 0.744941528 |
| g | MGYG-HGUT-00893 | g | Debaryomyces                 | -0.140393237 | 0.000139985 | 0.019237998 |
| g | MGYG-HGUT-00893 | g | Aspergillus                  | 0.037453358  | 0.311897386 | 0.672473134 |
| g | MGYG-HGUT-00893 | g | Kazachstania                 | -0.035529906 | 0.337416992 | 0.692361927 |
| g | MGYG-HGUT-00893 | g | Malassezia                   | 0.03675789   | 0.32097408  | 0.678140479 |
| g | MGYG-HGUT-00893 | g | unclassified Fungi           | 0.000701301  | 0.984898031 | 0.994062877 |
| g | MGYG-HGUT-00893 | g | Mycosphaerella               | -0.042024691 | 0.256467944 | 0.63656207  |
| g | MGYG-HGUT-00893 | g | Simplicillium                | -0.071276701 | 0.054071727 | 0.397628223 |
| g | MGYG-HGUT-00893 | g | unclassified Cordycipitaceae | 0.030202056  | 0.414865169 | 0.743581168 |
| g | MGYG-HGUT-00893 | g | unidentified                 | 0.013133564  | 0.722964254 | 0.905909738 |
| g | MGYG-HGUT-02098 | g | Verticillium                 | 0.039339821  | 0.28813483  | 0.659568247 |
| g | MGYG-HGUT-02098 | g | unclassified Tremellomycetes | -0.052288241 | 0.157872059 | 0.554768804 |
| g | MGYG-HGUT-02098 | g | Candida                      | -0.018514055 | 0.61725047  | 0.854828487 |
| g | MGYG-HGUT-02098 | g | Cladosporium                 | -0.00276084  | 0.940598811 | 0.978298588 |
| g | MGYG-HGUT-02098 | g | Debaryomyces                 | -0.112175023 | 0.00238725  | 0.092534351 |
| g | MGYG-HGUT-02098 | g | Aspergillus                  | 0.094831578  | 0.010306936 | 0.1959478   |
| g | MGYG-HGUT-02098 | g | Kazachstania                 | -0.078850965 | 0.033042564 | 0.326393361 |

|                   |                                |              |             |             |
|-------------------|--------------------------------|--------------|-------------|-------------|
| g MGYG-HGUT-02098 | g Malassezia                   | 0.003122219  | 0.93284079  | 0.976416726 |
| g MGYG-HGUT-02098 | g unclassified Fungi           | 0.037869862  | 0.306543135 | 0.670552593 |
| g MGYG-HGUT-02098 | g Mycosphaerella               | 0.027337637  | 0.46051382  | 0.769075712 |
| g MGYG-HGUT-02098 | g Simplicillium                | 0.025373982  | 0.49336103  | 0.787044217 |
| g MGYG-HGUT-02098 | g unclassified Cordycipitaceae | 0.045906522  | 0.21508463  | 0.602761005 |
| g MGYG-HGUT-02098 | g unidentified                 | 0.077303199  | 0.0366539   | 0.340070405 |
| g MGYG-HGUT-04088 | g Verticillium                 | 0.010095619  | 0.785241277 | 0.924135173 |
| g MGYG-HGUT-04088 | g unclassified Tremellomycetes | -0.018809982 | 0.611635482 | 0.851846101 |
| g MGYG-HGUT-04088 | g Candida                      | 0.002469166  | 0.946864539 | 0.980691059 |
| g MGYG-HGUT-04088 | g Cladosporium                 | 0.001141517  | 0.975420743 | 0.990490577 |
| g MGYG-HGUT-04088 | g Debaryomyces                 | -0.111950333 | 0.002436194 | 0.093287198 |
| g MGYG-HGUT-04088 | g Aspergillus                  | 0.035757937  | 0.334323455 | 0.689900703 |
| g MGYG-HGUT-04088 | g Kazachstania                 | -0.052115277 | 0.159253509 | 0.555851086 |
| g MGYG-HGUT-04088 | g Malassezia                   | 0.007548217  | 0.83856068  | 0.944407101 |
| g MGYG-HGUT-04088 | g unclassified Fungi           | 0.0147115    | 0.691296822 | 0.892872327 |
| g MGYG-HGUT-04088 | g Mycosphaerella               | -0.043166091 | 0.24376481  | 0.627821236 |
| g MGYG-HGUT-04088 | g Simplicillium                | 0.023800937  | 0.5205512   | 0.804508952 |
| g MGYG-HGUT-04088 | g unclassified Cordycipitaceae | 0.012973158  | 0.726211203 | 0.907006477 |
| g MGYG-HGUT-04088 | g unidentified                 | 0.044310491  | 0.231477796 | 0.617045021 |
| g RUG563          | g Verticillium                 | 0.064169788  | 0.082957589 | 0.455435557 |
| g RUG563          | g unclassified Tremellomycetes | -0.072103201 | 0.051336548 | 0.388308327 |
| g RUG563          | g Candida                      | -0.030585969 | 0.408956594 | 0.74030436  |
| g RUG563          | g Cladosporium                 | 0.011179373  | 0.762843416 | 0.914927919 |
| g RUG563          | g Debaryomyces                 | -0.141905183 | 0.000118299 | 0.018409489 |
| g RUG563          | g Aspergillus                  | 0.0858452    | 0.020270007 | 0.273942808 |
| g RUG563          | g Kazachstania                 | -0.055508523 | 0.133777057 | 0.522487595 |
| g RUG563          | g Malassezia                   | 0.040377158  | 0.275601226 | 0.653142958 |
| g RUG563          | g unclassified Fungi           | 0.042484036  | 0.251301603 | 0.632257147 |
| g RUG563          | g Mycosphaerella               | -0.02097638  | 0.571237183 | 0.832313398 |
| g RUG563          | g Simplicillium                | -0.009240149 | 0.803048451 | 0.931170141 |
| g RUG563          | g unclassified Cordycipitaceae | 0.056369983  | 0.127839143 | 0.51521926  |
| g RUG563          | g unidentified                 | 0.042096772  | 0.25565241  | 0.635647844 |
| g MGYG-HGUT-04154 | g Verticillium                 | 0.064564425  | 0.081078534 | 0.452126167 |
| g MGYG-HGUT-04154 | g unclassified Tremellomycetes | -0.070424723 | 0.057017192 | 0.405753815 |
| g MGYG-HGUT-04154 | g Candida                      | -0.017392271 | 0.638736715 | 0.86388896  |
| g MGYG-HGUT-04154 | g Cladosporium                 | 0.028805415  | 0.436780747 | 0.735281115 |
| g MGYG-HGUT-04154 | g Debaryomyces                 | -0.10949735  | 0.003033404 | 0.108079072 |
| g MGYG-HGUT-04154 | g Aspergillus                  | 0.065919141  | 0.074888905 | 0.444519981 |
| g MGYG-HGUT-04154 | g Kazachstania                 | -0.054441048 | 0.141427754 | 0.53603736  |
| g MGYG-HGUT-04154 | g Malassezia                   | 0.037191022  | 0.315301157 | 0.675194937 |
| g MGYG-HGUT-04154 | g unclassified Fungi           | 0.047612941  | 0.198499624 | 0.58591995  |
| g MGYG-HGUT-04154 | g Mycosphaerella               | -0.005600649 | 0.879844094 | 0.959363538 |
| g MGYG-HGUT-04154 | g Simplicillium                | 0.008527518  | 0.817961059 | 0.936487497 |
| g MGYG-HGUT-04154 | g unclassified Cordycipitaceae | 0.090005663  | 0.014922193 | 0.236737897 |
| g MGYG-HGUT-04154 | g unidentified                 | 0.026971792  | 0.466539432 | 0.772238427 |
| g MGYG-HGUT-02097 | g Verticillium                 | 0.021020696  | 0.570424186 | 0.831953372 |
| g MGYG-HGUT-02097 | g unclassified Tremellomycetes | -0.007650244 | 0.836409124 | 0.943389613 |
| g MGYG-HGUT-02097 | g Candida                      | -0.013374167 | 0.718103295 | 0.903594675 |
| g MGYG-HGUT-02097 | g Cladosporium                 | 0.018796338  | 0.611893876 | 0.852055003 |
| g MGYG-HGUT-02097 | g Debaryomyces                 | -0.11266478  | 0.002283664 | 0.091191455 |
| g MGYG-HGUT-02097 | g Aspergillus                  | 0.073254105  | 0.047721151 | 0.377500268 |
| g MGYG-HGUT-02097 | g Kazachstania                 | -0.084229916 | 0.022757797 | 0.283321191 |
| g MGYG-HGUT-02097 | g Malassezia                   | 0.025514802  | 0.490964505 | 0.785245012 |
| g MGYG-HGUT-02097 | g unclassified Fungi           | 0.040137098  | 0.278468206 | 0.655561858 |
| g MGYG-HGUT-02097 | g Mycosphaerella               | -0.058532477 | 0.113834413 | 0.497306733 |
| g MGYG-HGUT-02097 | g Simplicillium                | -0.016808951 | 0.65003173  | 0.870052588 |
| g MGYG-HGUT-02097 | g unclassified Cordycipitaceae | 0.029809941  | 0.420951679 | 0.74604389  |
| g MGYG-HGUT-02097 | g unidentified                 | 0.028035776  | 0.449136626 | 0.762723397 |
| g UBA11524        | g Verticillium                 | 0.072333731  | 0.050594592 | 0.386038256 |
| g UBA11524        | g unclassified Tremellomycetes | -0.077825958 | 0.035398343 | 0.335049436 |
| g UBA11524        | g Candida                      | -0.034894939 | 0.346127503 | 0.697400798 |
| g UBA11524        | g Cladosporium                 | -0.00775553  | 0.834190123 | 0.942292899 |
| g UBA11524        | g Debaryomyces                 | -0.083186798 | 0.0245015   | 0.291976214 |
| g UBA11524        | g Aspergillus                  | 0.100197643  | 0.00670332  | 0.155900075 |
| g UBA11524        | g Kazachstania                 | -0.079982303 | 0.030599169 | 0.315608804 |
| g UBA11524        | g Malassezia                   | 0.021960951  | 0.553305736 | 0.820471322 |
| g UBA11524        | g unclassified Fungi           | 0.050319304  | 0.174141403 | 0.569281535 |
| g UBA11524        | g Mycosphaerella               | 0.007047067  | 0.849146204 | 0.948917865 |
| g UBA11524        | g Simplicillium                | 0.011804298  | 0.750016295 | 0.910387945 |
| g UBA11524        | g unclassified Cordycipitaceae | 0.04641408   | 0.2100507   | 0.598807697 |
| g UBA11524        | g unidentified                 | 0.049417135  | 0.182000544 | 0.575010893 |
| g MGYG-HGUT-04017 | g Verticillium                 | 0.061213982  | 0.098175896 | 0.477873659 |
| g MGYG-HGUT-04017 | g unclassified Tremellomycetes | -0.002116502 | 0.954444816 | 0.983153416 |
| g MGYG-HGUT-04017 | g Candida                      | -0.042393441 | 0.252314757 | 0.633802908 |
| g MGYG-HGUT-04017 | g Cladosporium                 | 0.056403532  | 0.127612106 | 0.51521926  |
| g MGYG-HGUT-04017 | g Debaryomyces                 | -0.093276666 | 0.011632228 | 0.210414076 |
| g MGYG-HGUT-04017 | g Aspergillus                  | 0.060563509  | 0.101806903 | 0.480456307 |
| g MGYG-HGUT-04017 | g Kazachstania                 | -0.101312738 | 0.006114763 | 0.148686802 |

|                   |                                |              |             |             |
|-------------------|--------------------------------|--------------|-------------|-------------|
| g MGYG-HGUT-04017 | g Malassezia                   | 0.077741684  | 0.035598242 | 0.336039782 |
| g MGYG-HGUT-04017 | g unclassified Fungi           | -0.00147724  | 0.968195305 | 0.988560664 |
| g MGYG-HGUT-04017 | g Mycosphaerella               | 0.004882335  | 0.89515938  | 0.96495896  |
| g MGYG-HGUT-04017 | g Simplicillium                | 0.028286     | 0.445097935 | 0.76170364  |
| g MGYG-HGUT-04017 | g unclassified Cordycipitaceae | 0.059860563  | 0.105849923 | 0.486782157 |
| g MGYG-HGUT-04017 | g unidentified                 | 0.051070922  | 0.167789239 | 0.563342385 |
| g MGYG-HGUT-03773 | g Verticillium                 | 0.039625856  | 0.284641134 | 0.658096791 |
| g MGYG-HGUT-03773 | g unclassified Tremellomycetes | -0.085813258 | 0.02031681  | 0.274093852 |
| g MGYG-HGUT-03773 | g Candida                      | -0.017980653 | 0.627427794 | 0.859073688 |
| g MGYG-HGUT-03773 | g Cladosporium                 | -0.013672048 | 0.712100918 | 0.902091837 |
| g MGYG-HGUT-03773 | g Debaryomyces                 | -0.098614614 | 0.007626162 | 0.168194189 |
| g MGYG-HGUT-03773 | g Aspergillus                  | 0.074192324  | 0.044934173 | 0.368314034 |
| g MGYG-HGUT-03773 | g Kazachstania                 | -0.051155059 | 0.167089119 | 0.562908051 |
| g MGYG-HGUT-03773 | g Malassezia                   | 0.013208276  | 0.721453622 | 0.905336886 |
| g MGYG-HGUT-03773 | g unclassified Fungi           | -0.013141355 | 0.72280668  | 0.905819874 |
| g MGYG-HGUT-03773 | g Mycosphaerella               | -0.042824768 | 0.247516424 | 0.629733759 |
| g MGYG-HGUT-03773 | g Simplicillium                | -0.01214231  | 0.743106705 | 0.909574751 |
| g MGYG-HGUT-03773 | g unclassified Cordycipitaceae | 0.0414654    | 0.26285718  | 0.641058925 |
| g MGYG-HGUT-03773 | g unidentified                 | 0.01648339   | 0.656370955 | 0.874087061 |
| g MGYG-HGUT-04052 | g Verticillium                 | 0.01974479   | 0.594048466 | 0.844183861 |
| g MGYG-HGUT-04052 | g unclassified Tremellomycetes | -0.052252617 | 0.158155844 | 0.554768804 |
| g MGYG-HGUT-04052 | g Candida                      | 0.010202852  | 0.783016854 | 0.92270427  |
| g MGYG-HGUT-04052 | g Cladosporium                 | -0.010825659 | 0.770132837 | 0.917328419 |
| g MGYG-HGUT-04052 | g Debaryomyces                 | -0.144834671 | 8.50E-05    | 0.018295299 |
| g MGYG-HGUT-04052 | g Aspergillus                  | 0.066484853  | 0.072420827 | 0.442493968 |
| g MGYG-HGUT-04052 | g Kazachstania                 | -0.018445581 | 0.618552922 | 0.855825901 |
| g MGYG-HGUT-04052 | g Malassezia                   | 0.037095216  | 0.316550276 | 0.675601669 |
| g MGYG-HGUT-04052 | g unclassified Fungi           | 0.009513669  | 0.797343357 | 0.929238701 |
| g MGYG-HGUT-04052 | g Mycosphaerella               | -0.012574644 | 0.734299092 | 0.907315107 |
| g MGYG-HGUT-04052 | g Simplicillium                | -0.005084758 | 0.890839284 | 0.963103933 |
| g MGYG-HGUT-04052 | g unclassified Cordycipitaceae | 0.027198072  | 0.462807368 | 0.769075712 |
| g MGYG-HGUT-04052 | g unidentified                 | 0.04931367   | 0.18291838  | 0.575286078 |
| g MGYG-HGUT-01170 | g Verticillium                 | 0.03327709   | 0.368232246 | 0.71614358  |
| g MGYG-HGUT-01170 | g unclassified Tremellomycetes | -0.047981296 | 0.195045372 | 0.584501423 |
| g MGYG-HGUT-01170 | g Candida                      | -0.046149942 | 0.212659684 | 0.600680647 |
| g MGYG-HGUT-01170 | g Cladosporium                 | -0.017376001 | 0.639050641 | 0.86388896  |
| g MGYG-HGUT-01170 | g Debaryomyces                 | -0.137182027 | 0.000199028 | 0.023264945 |
| g MGYG-HGUT-01170 | g Aspergillus                  | 0.094818585  | 0.01031743  | 0.1959478   |
| g MGYG-HGUT-01170 | g Kazachstania                 | -0.069257008 | 0.061269483 | 0.415557779 |
| g MGYG-HGUT-01170 | g Malassezia                   | 0.060696099  | 0.101058247 | 0.478906569 |
| g MGYG-HGUT-01170 | g unclassified Fungi           | 0.035260992  | 0.341088655 | 0.694699556 |
| g MGYG-HGUT-01170 | g Mycosphaerella               | -0.05197183  | 0.160406119 | 0.557261178 |
| g MGYG-HGUT-01170 | g Simplicillium                | -0.01615175  | 0.662854032 | 0.877448257 |
| g MGYG-HGUT-01170 | g unclassified Cordycipitaceae | 0.038024445  | 0.304571501 | 0.670055703 |
| g MGYG-HGUT-01170 | g unidentified                 | 0.050131605  | 0.175755318 | 0.571204785 |
| g MGYG-HGUT-03871 | g Verticillium                 | -0.042722993 | 0.248642843 | 0.63117969  |
| g MGYG-HGUT-03871 | g unclassified Tremellomycetes | 0.017157576  | 0.643271334 | 0.866704515 |
| g MGYG-HGUT-03871 | g Candida                      | -0.030954351 | 0.403334284 | 0.736936858 |
| g MGYG-HGUT-03871 | g Cladosporium                 | 0.018920217  | 0.609549645 | 0.851291399 |
| g MGYG-HGUT-03871 | g Debaryomyces                 | -0.0686711   | 0.063499905 | 0.421193    |
| g MGYG-HGUT-03871 | g Aspergillus                  | 0.000828632  | 0.982156488 | 0.99313712  |
| g MGYG-HGUT-03871 | g Kazachstania                 | -0.030438916 | 0.411213866 | 0.74205734  |
| g MGYG-HGUT-03871 | g Malassezia                   | 0.001443966  | 0.968911319 | 0.988740749 |
| g MGYG-HGUT-03871 | g unclassified Fungi           | -0.020626797 | 0.577669679 | 0.836262521 |
| g MGYG-HGUT-03871 | g Mycosphaerella               | -0.053869328 | 0.145661026 | 0.540957635 |
| g MGYG-HGUT-03871 | g Simplicillium                | 0.005865262  | 0.874213207 | 0.957458208 |
| g MGYG-HGUT-03871 | g unclassified Cordycipitaceae | -0.0069376   | 0.851462087 | 0.949400054 |
| g MGYG-HGUT-03871 | g unidentified                 | 0.026809901  | 0.469219699 | 0.77312422  |
| g MGYG-HGUT-01237 | g Verticillium                 | 0.044168548  | 0.232977479 | 0.617638717 |
| g MGYG-HGUT-01237 | g unclassified Tremellomycetes | -0.011100771 | 0.764461481 | 0.915519623 |
| g MGYG-HGUT-01237 | g Candida                      | -0.026948752 | 0.466920366 | 0.772326375 |
| g MGYG-HGUT-01237 | g Cladosporium                 | 0.049030731  | 0.185445826 | 0.576715352 |
| g MGYG-HGUT-01237 | g Debaryomyces                 | -0.105754146 | 0.004204282 | 0.126033174 |
| g MGYG-HGUT-01237 | g Aspergillus                  | 0.07330444   | 0.047568036 | 0.377185783 |
| g MGYG-HGUT-01237 | g Kazachstania                 | -0.01264381  | 0.732893209 | 0.907315107 |
| g MGYG-HGUT-01237 | g Malassezia                   | 0.055324082  | 0.135075623 | 0.524661199 |
| g MGYG-HGUT-01237 | g unclassified Fungi           | 0.036300118  | 0.327041613 | 0.682858146 |
| g MGYG-HGUT-01237 | g Mycosphaerella               | -0.01573126  | 0.671110322 | 0.881540395 |
| g MGYG-HGUT-01237 | g Simplicillium                | -0.001482687 | 0.968078106 | 0.988549475 |
| g MGYG-HGUT-01237 | g unclassified Cordycipitaceae | 0.087350425  | 0.018168343 | 0.260620329 |
| g MGYG-HGUT-01237 | g unidentified                 | -0.00223406  | 0.951917495 | 0.982634054 |
| g MGYG-HGUT-03833 | g Verticillium                 | 0.029166883  | 0.431045784 | 0.753212133 |
| g MGYG-HGUT-03833 | g unclassified Tremellomycetes | -0.053582114 | 0.14782389  | 0.543295086 |
| g MGYG-HGUT-03833 | g Candida                      | 0.020257274  | 0.584505855 | 0.839473528 |
| g MGYG-HGUT-03833 | g Cladosporium                 | -0.003505954 | 0.924609832 | 0.974172444 |
| g MGYG-HGUT-03833 | g Debaryomyces                 | -0.094698925 | 0.010414524 | 0.196917494 |
| g MGYG-HGUT-03833 | g Aspergillus                  | 0.087816211  | 0.017557793 | 0.257692886 |
| g MGYG-HGUT-03833 | g Kazachstania                 | -0.039025943 | 0.292001691 | 0.660859538 |



|                   |                                |              |             |             |
|-------------------|--------------------------------|--------------|-------------|-------------|
| g MGYG-HGUT-03833 | g Malassezia                   | 0.035656641  | 0.335695416 | 0.690980139 |
| g MGYG-HGUT-03833 | g unclassified Fungi           | 0.028048407  | 0.448932271 | 0.762723397 |
| g MGYG-HGUT-03833 | g Mycosphaerella               | -0.011890125 | 0.74825991  | 0.910244784 |
| g MGYG-HGUT-03833 | g Simplicillium                | 0.027466917  | 0.458394944 | 0.767399984 |
| g MGYG-HGUT-03833 | g unclassified Cordycipitaceae | 0.051145577  | 0.167167912 | 0.562908051 |
| g MGYG-HGUT-03833 | g unidentified                 | 0.044616661  | 0.228266301 | 0.613524642 |
| g MGYG-HGUT-02699 | g Verticillium                 | 0.035130629  | 0.342877747 | 0.695270538 |
| g MGYG-HGUT-02699 | g unclassified Tremellomycetes | -0.030008429 | 0.417864183 | 0.74476736  |
| g MGYG-HGUT-02699 | g Candida                      | -0.008564819 | 0.817178797 | 0.936168239 |
| g MGYG-HGUT-02699 | g Cladosporium                 | 0.018700251  | 0.613714904 | 0.852976464 |
| g MGYG-HGUT-02699 | g Debaryomyces                 | -0.100954997 | 0.006298314 | 0.150048656 |
| g MGYG-HGUT-02699 | g Aspergillus                  | 0.058433926  | 0.114445277 | 0.497329568 |
| g MGYG-HGUT-02699 | g Kazachstania                 | -0.054581543 | 0.140402055 | 0.534436887 |
| g MGYG-HGUT-02699 | g Malassezia                   | 0.049775458  | 0.178848187 | 0.574257008 |
| g MGYG-HGUT-02699 | g unclassified Fungi           | 0.018961176  | 0.60877543  | 0.851291399 |
| g MGYG-HGUT-02699 | g Mycosphaerella               | 0.010843005  | 0.769774893 | 0.917270973 |
| g MGYG-HGUT-02699 | g Simplicillium                | 0.001715606  | 0.963066736 | 0.986465221 |
| g MGYG-HGUT-02699 | g unclassified Cordycipitaceae | 0.061626272  | 0.095928415 | 0.476579572 |
| g MGYG-HGUT-02699 | g unidentified                 | 0.009211609  | 0.803644347 | 0.931248848 |
| g MGYG-HGUT-04174 | g Verticillium                 | 0.037125746  | 0.31615187  | 0.675194937 |
| g MGYG-HGUT-04174 | g unclassified Tremellomycetes | -0.020290993 | 0.583880494 | 0.839104641 |
| g MGYG-HGUT-04174 | g Candida                      | -0.032404881 | 0.381649237 | 0.723098466 |
| g MGYG-HGUT-04174 | g Cladosporium                 | 0.053419448  | 0.149059663 | 0.545041243 |
| g MGYG-HGUT-04174 | g Debaryomyces                 | -0.101312772 | 0.006114746 | 0.148686802 |
| g MGYG-HGUT-04174 | g Aspergillus                  | 0.032414082  | 0.381513998 | 0.723098466 |
| g MGYG-HGUT-04174 | g Kazachstania                 | -0.052808608 | 0.153770546 | 0.551219483 |
| g MGYG-HGUT-04174 | g Malassezia                   | 0.045797883  | 0.216173286 | 0.603414854 |
| g MGYG-HGUT-04174 | g unclassified Fungi           | 0.03798909   | 0.305021691 | 0.670057703 |
| g MGYG-HGUT-04174 | g Mycosphaerella               | -0.028729031 | 0.437998216 | 0.75696507  |
| g MGYG-HGUT-04174 | g Simplicillium                | 0.004807443  | 0.896758513 | 0.965241639 |
| g MGYG-HGUT-04174 | g unclassified Cordycipitaceae | 0.073539678  | 0.046857903 | 0.375701373 |
| g MGYG-HGUT-04174 | g unidentified                 | 0.010716973  | 0.772376795 | 0.918101184 |
| g MGYG-HGUT-03227 | g Verticillium                 | 0.112061116  | 0.002411949 | 0.093070889 |
| g MGYG-HGUT-03227 | g unclassified Tremellomycetes | -0.034007884 | 0.358533205 | 0.709520182 |
| g MGYG-HGUT-03227 | g Candida                      | 0.007559978  | 0.838312594 | 0.944350433 |
| g MGYG-HGUT-03227 | g Cladosporium                 | 0.052205504  | 0.15853174  | 0.555039937 |
| g MGYG-HGUT-03227 | g Debaryomyces                 | -0.109930688 | 0.002919061 | 0.104710173 |
| g MGYG-HGUT-03227 | g Aspergillus                  | 0.081195983  | 0.028151741 | 0.307552108 |
| g MGYG-HGUT-03227 | g Kazachstania                 | -0.002967191 | 0.936168165 | 0.977345273 |
| g MGYG-HGUT-03227 | g Malassezia                   | 0.057377463  | 0.121156554 | 0.505823928 |
| g MGYG-HGUT-03227 | g unclassified Fungi           | 0.047802879  | 0.196712945 | 0.585710858 |
| g MGYG-HGUT-03227 | g Mycosphaerella               | 0.027325525  | 0.4607126   | 0.769075712 |
| g MGYG-HGUT-03227 | g Simplicillium                | -0.029239698 | 0.429895825 | 0.752424351 |
| g MGYG-HGUT-03227 | g unclassified Cordycipitaceae | 0.086711106  | 0.019036528 | 0.267167825 |
| g MGYG-HGUT-03227 | g unidentified                 | 0.008492459  | 0.81869645  | 0.936487497 |
| g MGYG-HGUT-04235 | g Verticillium                 | 0.048397276  | 0.191197634 | 0.580480671 |
| g MGYG-HGUT-04235 | g unclassified Tremellomycetes | -0.036382905 | 0.325938852 | 0.682100836 |
| g MGYG-HGUT-04235 | g Candida                      | -0.057325802 | 0.121492448 | 0.506172817 |
| g MGYG-HGUT-04235 | g Cladosporium                 | 0.014150524  | 0.702496775 | 0.897342732 |
| g MGYG-HGUT-04235 | g Debaryomyces                 | -0.152704583 | 3.38E-05    | 0.011128631 |
| g MGYG-HGUT-04235 | g Aspergillus                  | 0.049087492  | 0.184936731 | 0.576342405 |
| g MGYG-HGUT-04235 | g Kazachstania                 | -0.032009809 | 0.387483536 | 0.727203277 |
| g MGYG-HGUT-04235 | g Malassezia                   | 0.039136769  | 0.2906324   | 0.660476148 |
| g MGYG-HGUT-04235 | g unclassified Fungi           | 0.052976963  | 0.152461038 | 0.549189615 |
| g MGYG-HGUT-04235 | g Mycosphaerella               | -0.012546748 | 0.734866351 | 0.907315107 |
| g MGYG-HGUT-04235 | g Simplicillium                | -0.017788628 | 0.631109174 | 0.860229872 |
| g MGYG-HGUT-04235 | g unclassified Cordycipitaceae | 0.037003402  | 0.317750382 | 0.676223819 |
| g MGYG-HGUT-04235 | g unidentified                 | 0.042186418  | 0.254640645 | 0.635347198 |
| g Christensenella | g Verticillium                 | 0.030290864  | 0.413493919 | 0.742811081 |
| g Christensenella | g unclassified Tremellomycetes | -0.04032176  | 0.276261046 | 0.653710731 |
| g Christensenella | g Candida                      | -0.076722757 | 0.03809216  | 0.343232686 |
| g Christensenella | g Cladosporium                 | 0.013028127  | 0.725097953 | 0.90675804  |
| g Christensenella | g Debaryomyces                 | -0.117327806 | 0.001484247 | 0.074173153 |
| g Christensenella | g Aspergillus                  | 0.047703104  | 0.197650024 | 0.58591995  |
| g Christensenella | g Kazachstania                 | -0.058884208 | 0.111675094 | 0.495063318 |
| g Christensenella | g Malassezia                   | 0.023673258  | 0.522791474 | 0.805852786 |
| g Christensenella | g unclassified Fungi           | 0.022374535  | 0.545856324 | 0.816281885 |
| g Christensenella | g Mycosphaerella               | -0.002048137 | 0.955914756 | 0.983900408 |
| g Christensenella | g Simplicillium                | -0.041321342 | 0.264520489 | 0.64234852  |
| g Christensenella | g unclassified Cordycipitaceae | 0.027647278  | 0.455448023 | 0.766096335 |
| g Christensenella | g unidentified                 | 0.075592229  | 0.041031218 | 0.354153628 |
| g MGYG-HGUT-02096 | g Verticillium                 | 0.062422456  | 0.091704665 | 0.470392034 |
| g MGYG-HGUT-02096 | g unclassified Tremellomycetes | -0.05106379  | 0.167848691 | 0.563342385 |
| g MGYG-HGUT-02096 | g Candida                      | -0.012665129 | 0.732460065 | 0.907315107 |
| g MGYG-HGUT-02096 | g Cladosporium                 | 0.003418826  | 0.92647803  | 0.974172444 |
| g MGYG-HGUT-02096 | g Debaryomyces                 | -0.132308922 | 0.000334637 | 0.0321046   |
| g MGYG-HGUT-02096 | g Aspergillus                  | 0.004762445  | 0.897719551 | 0.965250198 |
| g MGYG-HGUT-02096 | g Kazachstania                 | -0.052205421 | 0.158532397 | 0.555039937 |

|                     |                                |              |             |             |
|---------------------|--------------------------------|--------------|-------------|-------------|
| g MGYG-HGUT-02096   | g Malassezia                   | 0.058389971  | 0.114718554 | 0.497912726 |
| g MGYG-HGUT-02096   | g unclassified Fungi           | 0.028954665  | 0.434407488 | 0.754622456 |
| g MGYG-HGUT-02096   | g Mycosphaerella               | 0.005115654  | 0.890180184 | 0.962904765 |
| g MGYG-HGUT-02096   | g Simplicillium                | 0.029509262  | 0.425654106 | 0.749483281 |
| g MGYG-HGUT-02096   | g unclassified Cordycipitaceae | 0.046985123  | 0.204489516 | 0.594053722 |
| g MGYG-HGUT-02096   | g unidentified                 | 0.006253898  | 0.86595474  | 0.954967619 |
| g MGYG-HGUT-01822   | g Verticillium                 | 0.061352152  | 0.097418073 | 0.477479412 |
| g MGYG-HGUT-01822   | g unclassified Tremellomycetes | -0.037325274 | 0.313556225 | 0.673448862 |
| g MGYG-HGUT-01822   | g Candida                      | -0.059586718 | 0.10745894  | 0.488878117 |
| g MGYG-HGUT-01822   | g Cladosporium                 | 0.00523935   | 0.887542176 | 0.962165284 |
| g MGYG-HGUT-01822   | g Debaryomyces                 | -0.070609914 | 0.056365863 | 0.404382079 |
| g MGYG-HGUT-01822   | g Aspergillus                  | 0.012562099  | 0.734554169 | 0.907315107 |
| g MGYG-HGUT-01822   | g Kazachstania                 | -0.046971234 | 0.204623494 | 0.594053722 |
| g MGYG-HGUT-01822   | g Malassezia                   | 0.052678062  | 0.154791832 | 0.552261352 |
| g MGYG-HGUT-01822   | g unclassified Fungi           | 0.032900424  | 0.374407724 | 0.718661805 |
| g MGYG-HGUT-01822   | g Mycosphaerella               | -0.043465072 | 0.240511493 | 0.624103143 |
| g MGYG-HGUT-01822   | g Simplicillium                | 0.028131345  | 0.447591678 | 0.762502994 |
| g MGYG-HGUT-01822   | g unclassified Cordycipitaceae | 0.026952167  | 0.466863879 | 0.772326375 |
| g MGYG-HGUT-01822   | g unidentified                 | 0.04649126   | 0.209292755 | 0.598476835 |
| g Christensenella A | g Verticillium                 | 0.00603782   | 0.870544626 | 0.955832776 |
| g Christensenella A | g unclassified Tremellomycetes | -0.00561122  | 0.879619024 | 0.959304186 |
| g Christensenella A | g Candida                      | -0.070513873 | 0.056702869 | 0.40482151  |
| g Christensenella A | g Cladosporium                 | 0.049402737  | 0.182128064 | 0.575010893 |
| g Christensenella A | g Debaryomyces                 | -0.130738443 | 0.000394181 | 0.035930399 |
| g Christensenella A | g Aspergillus                  | 0.050255978  | 0.174684671 | 0.569927454 |
| g Christensenella A | g Kazachstania                 | -0.015045885 | 0.684652526 | 0.888847139 |
| g Christensenella A | g Malassezia                   | 0.048781856  | 0.18769021  | 0.577701512 |
| g Christensenella A | g unclassified Fungi           | 0.005967685  | 0.872035376 | 0.956423148 |
| g Christensenella A | g Mycosphaerella               | -0.03456404  | 0.350722934 | 0.702774112 |
| g Christensenella A | g Simplicillium                | 0.003766441  | 0.919027034 | 0.971834124 |
| g Christensenella A | g unclassified Cordycipitaceae | 0.05268882   | 0.154707476 | 0.552146547 |
| g Christensenella A | g unidentified                 | 0.011086959  | 0.764745912 | 0.915653003 |
| g Phill             | g Verticillium                 | 0.033059374  | 0.37210302  | 0.717884076 |
| g Phill             | g unclassified Tremellomycetes | -0.078502344 | 0.033828314 | 0.32901766  |
| g Phill             | g Candida                      | -0.004627617 | 0.900599948 | 0.96605663  |
| g Phill             | g Cladosporium                 | -0.021554377 | 0.560677001 | 0.826680231 |
| g Phill             | g Debaryomyces                 | -0.134228784 | 0.000273256 | 0.028073785 |
| g Phill             | g Aspergillus                  | 0.059682432  | 0.106894379 | 0.487777626 |
| g Phill             | g Kazachstania                 | -0.05076829  | 0.170325672 | 0.564916697 |
| g Phill             | g Malassezia                   | 0.032934853  | 0.373907763 | 0.718484102 |
| g Phill             | g unclassified Fungi           | 0.043191856  | 0.243483243 | 0.62750601  |
| g Phill             | g Mycosphaerella               | 0.000256421  | 0.994477898 | 0.997274144 |
| g Phill             | g Simplicillium                | -0.05220911  | 0.158502939 | 0.555039937 |
| g Phill             | g unclassified Cordycipitaceae | 0.011952765  | 0.746978863 | 0.90996433  |
| g Phill             | g unidentified                 | 0.072458546  | 0.050196633 | 0.385192726 |
| g MGYG-HGUT-04245   | g Verticillium                 | 0.057228365  | 0.122127962 | 0.506577845 |
| g MGYG-HGUT-04245   | g unclassified Tremellomycetes | -0.063139201 | 0.088031125 | 0.465539911 |
| g MGYG-HGUT-04245   | g Candida                      | -0.020287332 | 0.58394839  | 0.839104641 |
| g MGYG-HGUT-04245   | g Cladosporium                 | -0.012689735 | 0.731960237 | 0.907315107 |
| g MGYG-HGUT-04245   | g Debaryomyces                 | -0.12149511  | 0.000996746 | 0.059590769 |
| g MGYG-HGUT-04245   | g Aspergillus                  | 0.041390099  | 0.263725714 | 0.641845793 |
| g MGYG-HGUT-04245   | g Kazachstania                 | -0.061139112 | 0.098588499 | 0.477955684 |
| g MGYG-HGUT-04245   | g Malassezia                   | 0.035216232  | 0.341702272 | 0.694699556 |
| g MGYG-HGUT-04245   | g unclassified Fungi           | 0.043503246  | 0.240098315 | 0.623642702 |
| g MGYG-HGUT-04245   | g Mycosphaerella               | -0.032358752 | 0.382327667 | 0.723410923 |
| g MGYG-HGUT-04245   | g Simplicillium                | 0.022986721  | 0.534921645 | 0.812362349 |
| g MGYG-HGUT-04245   | g unclassified Cordycipitaceae | 0.034168585  | 0.356265297 | 0.707051645 |
| g MGYG-HGUT-04245   | g unidentified                 | 0.061467448  | 0.096789284 | 0.477459115 |
| g CAG-1024          | g Verticillium                 | 0.039296473  | 0.288666803 | 0.659613931 |
| g CAG-1024          | g unclassified Tremellomycetes | -0.045363826 | 0.220562398 | 0.607083027 |
| g CAG-1024          | g Candida                      | -0.017285758 | 0.640793027 | 0.864466065 |
| g CAG-1024          | g Cladosporium                 | 0.039114498  | 0.290907218 | 0.660476148 |
| g CAG-1024          | g Debaryomyces                 | -0.165372267 | 6.97E-06    | 0.008626179 |
| g CAG-1024          | g Aspergillus                  | 0.042264014  | 0.253767118 | 0.634509259 |
| g CAG-1024          | g Kazachstania                 | -0.019501349 | 0.59860618  | 0.846523771 |
| g CAG-1024          | g Malassezia                   | 0.033829982  | 0.36105441  | 0.711747526 |
| g CAG-1024          | g unclassified Fungi           | 0.052488158  | 0.156286648 | 0.553559117 |
| g CAG-1024          | g Mycosphaerella               | -0.027699536 | 0.454596168 | 0.765814499 |
| g CAG-1024          | g Simplicillium                | -0.013859586 | 0.708331051 | 0.901016851 |
| g CAG-1024          | g unclassified Cordycipitaceae | 0.059535369  | 0.107762789 | 0.489543137 |
| g CAG-1024          | g unidentified                 | 0.01201601   | 0.745686126 | 0.909574751 |
| g MGYG-HGUT-00718   | g Verticillium                 | 0.08080752   | 0.028916095 | 0.31117391  |
| g MGYG-HGUT-00718   | g unclassified Tremellomycetes | -0.063739205 | 0.085047811 | 0.459591722 |
| g MGYG-HGUT-00718   | g Candida                      | -0.043675823 | 0.238236661 | 0.622892944 |
| g MGYG-HGUT-00718   | g Cladosporium                 | 0.011017964  | 0.766167208 | 0.916276173 |
| g MGYG-HGUT-00718   | g Debaryomyces                 | -0.15559409  | 2.39E-05    | 0.009462963 |
| g MGYG-HGUT-00718   | g Aspergillus                  | 0.056060843  | 0.129946016 | 0.517527876 |
| g MGYG-HGUT-00718   | g Kazachstania                 | -0.088618568 | 0.016548087 | 0.250706068 |

|                   |                                |              |             |             |
|-------------------|--------------------------------|--------------|-------------|-------------|
| g MGYG-HGUT-00718 | g Malassezia                   | 0.047565536  | 0.198947395 | 0.586587163 |
| g MGYG-HGUT-00718 | g unclassified Fungi           | 0.059494066  | 0.108007684 | 0.489838272 |
| g MGYG-HGUT-00718 | g Mycosphaerella               | -0.020935625 | 0.571985354 | 0.832908905 |
| g MGYG-HGUT-00718 | g Simplicillium                | -0.024193089 | 0.51370147  | 0.801136059 |
| g MGYG-HGUT-00718 | g unclassified Cordycipitaceae | 0.077220256  | 0.036856551 | 0.340172772 |
| g MGYG-HGUT-00718 | g unidentified                 | 0.0512572    | 0.166242136 | 0.562541523 |
| g UBA5394         | g Verticillium                 | 0.078735029  | 0.03330212  | 0.326904486 |
| g UBA5394         | g unclassified Tremellomycetes | 0.006308497  | 0.86479568  | 0.954450134 |
| g UBA5394         | g Candida                      | -0.023804387 | 0.52049073  | 0.804508952 |
| g UBA5394         | g Cladosporium                 | 0.093045748  | 0.011841405 | 0.212023267 |
| g UBA5394         | g Debaryomyces                 | -0.13462958  | 0.000261849 | 0.027872801 |
| g UBA5394         | g Aspergillus                  | 0.018873258  | 0.610437809 | 0.851291399 |
| g UBA5394         | g Kazachstania                 | -0.00795191  | 0.830054751 | 0.940630371 |
| g UBA5394         | g Malassezia                   | 0.09720265   | 0.008543476 | 0.176921838 |
| g UBA5394         | g unclassified Fungi           | 0.026188211  | 0.479591016 | 0.780189053 |
| g UBA5394         | g Mycosphaerella               | -0.008690621 | 0.814541912 | 0.934766567 |
| g UBA5394         | g Simplicillium                | 0.065307532  | 0.0776339   | 0.449532201 |
| g UBA5394         | g unclassified Cordycipitaceae | 0.113132241  | 0.002188644 | 0.088979156 |
| g UBA5394         | g unidentified                 | 0.012381955  | 0.738220371 | 0.907794719 |
| g PeH17           | g Verticillium                 | 0.011269662  | 0.760986026 | 0.914462199 |
| g PeH17           | g unclassified Tremellomycetes | -0.071480913 | 0.053384874 | 0.396386737 |
| g PeH17           | g Candida                      | -0.011417781 | 0.757941989 | 0.912462131 |
| g PeH17           | g Cladosporium                 | -0.041798131 | 0.259043038 | 0.637931914 |
| g PeH17           | g Debaryomyces                 | -0.097277028 | 0.008492802 | 0.176412932 |
| g PeH17           | g Aspergillus                  | 0.069764255  | 0.059391165 | 0.412336263 |
| g PeH17           | g Kazachstania                 | -0.049315667 | 0.182900639 | 0.575286078 |
| g PeH17           | g Malassezia                   | 0.035089114  | 0.343448756 | 0.695591476 |
| g PeH17           | g unclassified Fungi           | 0.036403288  | 0.3256677   | 0.682100836 |
| g PeH17           | g Mycosphaerella               | -0.022502067 | 0.5435693   | 0.816215242 |
| g PeH17           | g Simplicillium                | 0.006879886  | 0.852683624 | 0.949400054 |
| g PeH17           | g unclassified Cordycipitaceae | 0.015687869  | 0.671964568 | 0.881783585 |
| g PeH17           | g unidentified                 | 0.0786627    | 0.033464931 | 0.327713401 |
| g UBA1685         | g Verticillium                 | 0.055838042  | 0.131481071 | 0.518655697 |
| g UBA1685         | g unclassified Tremellomycetes | -0.034634692 | 0.349738521 | 0.70199792  |
| g UBA1685         | g Candida                      | -0.018117357 | 0.624812639 | 0.8570016   |
| g UBA1685         | g Cladosporium                 | 0.023335497  | 0.528741581 | 0.809599703 |
| g UBA1685         | g Debaryomyces                 | -0.125941828 | 0.000642847 | 0.046998384 |
| g UBA1685         | g Aspergillus                  | 0.047546611  | 0.199126351 | 0.586641865 |
| g UBA1685         | g Kazachstania                 | -0.079390374 | 0.031857541 | 0.322599522 |
| g UBA1685         | g Malassezia                   | 0.03989531   | 0.281376219 | 0.657094722 |
| g UBA1685         | g unclassified Fungi           | 0.044672951  | 0.227679327 | 0.612967811 |
| g UBA1685         | g Mycosphaerella               | -0.018908152 | 0.609777788 | 0.851291399 |
| g UBA1685         | g Simplicillium                | 0.034239482  | 0.355267637 | 0.706263786 |
| g UBA1685         | g unclassified Cordycipitaceae | 0.065183648  | 0.07819975  | 0.450222934 |
| g UBA1685         | g unidentified                 | 0.012864469  | 0.728414083 | 0.907012052 |
| g RUG472          | g Verticillium                 | 0.031638396  | 0.39301765  | 0.73075316  |
| g RUG472          | g unclassified Tremellomycetes | -0.027541443 | 0.457175984 | 0.766960938 |
| g RUG472          | g Candida                      | 0.0588607    | 0.111818404 | 0.495063318 |
| g RUG472          | g Cladosporium                 | 0.027679974  | 0.454914944 | 0.765814499 |
| g RUG472          | g Debaryomyces                 | -0.085227749 | 0.021191535 | 0.278255687 |
| g RUG472          | g Aspergillus                  | 0.015944373  | 0.666920817 | 0.879421986 |
| g RUG472          | g Kazachstania                 | -0.065094319 | 0.078609846 | 0.450732872 |
| g RUG472          | g Malassezia                   | 0.04210703   | 0.255536489 | 0.635647844 |
| g RUG472          | g unclassified Fungi           | 0.023838357  | 0.51989556  | 0.804200383 |
| g RUG472          | g Mycosphaerella               | -0.010067724 | 0.785820218 | 0.924258036 |
| g RUG472          | g Simplicillium                | 0.062409393  | 0.091772737 | 0.470513133 |
| g RUG472          | g unclassified Cordycipitaceae | 0.039631526  | 0.284572166 | 0.658096791 |
| g RUG472          | g unidentified                 | 0.031665963  | 0.392605261 | 0.730662833 |
| g MGYG-HGUT-03100 | g Verticillium                 | 0.072308832  | 0.050674294 | 0.386058587 |
| g MGYG-HGUT-03100 | g unclassified Tremellomycetes | -0.003353522 | 0.927878534 | 0.974599406 |
| g MGYG-HGUT-03100 | g Candida                      | -0.019125244 | 0.605678581 | 0.849925837 |
| g MGYG-HGUT-03100 | g Cladosporium                 | 0.082833514  | 0.025117692 | 0.294021481 |
| g MGYG-HGUT-03100 | g Debaryomyces                 | -0.058842816 | 0.111927523 | 0.495063318 |
| g MGYG-HGUT-03100 | g Aspergillus                  | 0.069060072  | 0.062011838 | 0.417170577 |
| g MGYG-HGUT-03100 | g Kazachstania                 | -0.018256134 | 0.622162613 | 0.856123107 |
| g MGYG-HGUT-03100 | g Malassezia                   | 0.083098291  | 0.024654633 | 0.292809257 |
| g MGYG-HGUT-03100 | g unclassified Fungi           | 0.003367123  | 0.927586829 | 0.974599406 |
| g MGYG-HGUT-03100 | g Mycosphaerella               | 0.01284145   | 0.728880909 | 0.907012052 |
| g MGYG-HGUT-03100 | g Simplicillium                | 0.02868057   | 0.438771634 | 0.757620775 |
| g MGYG-HGUT-03100 | g unclassified Cordycipitaceae | 0.109884254  | 0.002931122 | 0.104787627 |
| g MGYG-HGUT-03100 | g unidentified                 | -0.017819436 | 0.630517925 | 0.860229872 |
| g MGYG-HGUT-04070 | g Verticillium                 | 0.069032011  | 0.062118216 | 0.417170577 |
| g MGYG-HGUT-04070 | g unclassified Tremellomycetes | -0.089190273 | 0.015860041 | 0.247173713 |
| g MGYG-HGUT-04070 | g Candida                      | -0.06629624  | 0.073236215 | 0.443355619 |
| g MGYG-HGUT-04070 | g Cladosporium                 | 0.040448814  | 0.274749367 | 0.652614546 |
| g MGYG-HGUT-04070 | g Debaryomyces                 | -0.078395526 | 0.034072236 | 0.329231974 |
| g MGYG-HGUT-04070 | g Aspergillus                  | 0.021898999  | 0.554425856 | 0.821334564 |
| g MGYG-HGUT-04070 | g Kazachstania                 | -0.020816877 | 0.574167898 | 0.834664141 |

|                   |                                |              |             |              |
|-------------------|--------------------------------|--------------|-------------|--------------|
| g MGYG-HGUT-04070 | g Malassezia                   | 0.085264196  | 0.021136145 | 0.278255687  |
| g MGYG-HGUT-04070 | g unclassified Fungi           | -0.004328208 | 0.907001026 | 0.968700531  |
| g MGYG-HGUT-04070 | g Mycosphaerella               | -0.023146253 | 0.532090337 | 0.811490628  |
| g MGYG-HGUT-04070 | g Simplicillium                | 0.055110899  | 0.136588643 | 0.527896646  |
| g MGYG-HGUT-04070 | g unclassified Cordycipitaceae | 0.085159252  | 0.021295975 | 0.278255687  |
| g MGYG-HGUT-04070 | g unidentified                 | 0.012935466  | 0.726974863 | 0.907012052  |
| g MGYG-HGUT-01665 | g Verticillium                 | 0.062235596  | 0.092682312 | 0.471664958  |
| g MGYG-HGUT-01665 | g unclassified Tremellomycetes | -0.101484299 | 0.006028455 | 0.148686802  |
| g MGYG-HGUT-01665 | g Candida                      | -0.060571071 | 0.101764087 | 0.480456307  |
| g MGYG-HGUT-01665 | g Cladosporium                 | -0.011781358 | 0.750485971 | 0.910387945  |
| g MGYG-HGUT-01665 | g Debaryomyces                 | -0.117873852 | 0.00140979  | 0.072766386  |
| g MGYG-HGUT-01665 | g Aspergillus                  | 0.004357914  | 0.90636568  | 0.968217406  |
| g MGYG-HGUT-01665 | g Kazachstania                 | -0.01286016  | 0.72850145  | 0.907012052  |
| g MGYG-HGUT-01665 | g Malassezia                   | 0.043751821  | 0.237420078 | 0.622024542  |
| g MGYG-HGUT-01665 | g unclassified Fungi           | 0.054121521  | 0.143781894 | 0.538689764  |
| g MGYG-HGUT-01665 | g Mycosphaerella               | 0.037172941  | 0.315536655 | 0.675194937  |
| g MGYG-HGUT-01665 | g Simplicillium                | -0.012505858 | 0.735698112 | 0.90737623   |
| g MGYG-HGUT-01665 | g unclassified Cordycipitaceae | 0.05787414   | 0.117964058 | 0.502487018  |
| g MGYG-HGUT-01665 | g unidentified                 | 0.079180575  | 0.032314054 | 0.324736293  |
| g MGYG-HGUT-03967 | g Verticillium                 | 0.068500684  | 0.064161066 | 0.423004068  |
| g MGYG-HGUT-03967 | g unclassified Tremellomycetes | -0.110558658 | 0.002760318 | 0.100770018  |
| g MGYG-HGUT-03967 | g Candida                      | -0.052650675 | 0.15500673  | 0.552672864  |
| g MGYG-HGUT-03967 | g Cladosporium                 | 0.004791279  | 0.897103716 | 0.965241639  |
| g MGYG-HGUT-03967 | g Debaryomyces                 | -0.121904221 | 0.000957895 | 0.05906749   |
| g MGYG-HGUT-03967 | g Aspergillus                  | 0.032917565  | 0.374158761 | 0.718546866  |
| g MGYG-HGUT-03967 | g Kazachstania                 | -0.053825869 | 0.145986732 | 0.540957635  |
| g MGYG-HGUT-03967 | g Malassezia                   | 0.083904056  | 0.023290581 | 0.285641852  |
| g MGYG-HGUT-03967 | g unclassified Fungi           | 0.040186045  | 0.277882001 | 0.654910321  |
| g MGYG-HGUT-03967 | g Mycosphaerella               | 0.017875761  | 0.629437571 | 0.859818244  |
| g MGYG-HGUT-03967 | g Simplicillium                | -0.032984894 | 0.373181852 | 0.718484102  |
| g MGYG-HGUT-03967 | g unclassified Cordycipitaceae | 0.080608488  | 0.02931458  | 0.312580107  |
| g MGYG-HGUT-03967 | g unidentified                 | 0.077006792  | 0.037382483 | 0.341384621  |
| g MGYG-HGUT-04010 | g Verticillium                 | 0.077030978  | 0.037322577 | 0.341376127  |
| g MGYG-HGUT-04010 | g unclassified Tremellomycetes | -0.050932279 | 0.168947708 | 0.563848296  |
| g MGYG-HGUT-04010 | g Candida                      | -0.047931279 | 0.195511804 | 0.584767076  |
| g MGYG-HGUT-04010 | g Cladosporium                 | 0.029026254  | 0.433271776 | 0.754104067  |
| g MGYG-HGUT-04010 | g Debaryomyces                 | -0.106522002 | 0.003935134 | 0.122598495  |
| g MGYG-HGUT-04010 | g Aspergillus                  | 0.026090338  | 0.481235087 | 0.780189053  |
| g MGYG-HGUT-04010 | g Kazachstania                 | -0.035476713 | 0.338141257 | 0.692780403  |
| g MGYG-HGUT-04010 | g Malassezia                   | 0.047122673  | 0.203166083 | 0.593061862  |
| g MGYG-HGUT-04010 | g unclassified Fungi           | 0.05154451   | 0.163876949 | 0.561723687  |
| g MGYG-HGUT-04010 | g Mycosphaerella               | 0.011650729  | 0.753162194 | 0.911272051  |
| g MGYG-HGUT-04010 | g Simplicillium                | 0.050273789  | 0.174531737 | 0.569927454  |
| g MGYG-HGUT-04010 | g unclassified Cordycipitaceae | 0.07608377   | 0.039730591 | 0.350298383  |
| g MGYG-HGUT-04010 | g unidentified                 | 0.035430323  | 0.3387737   | 0.693270797  |
| g MGYG-HGUT-01850 | g Verticillium                 | 0.065020531  | 0.078949909 | 0.45101344   |
| g MGYG-HGUT-01850 | g unclassified Tremellomycetes | -0.042539967 | 0.250677518 | 0.632007503  |
| g MGYG-HGUT-01850 | g Candida                      | -0.049376536 | 0.182360287 | 0.575010893  |
| g MGYG-HGUT-01850 | g Cladosporium                 | 0.033234715  | 0.369570851 | 0.71692327   |
| g MGYG-HGUT-01850 | g Debaryomyces                 | -0.155962446 | 2.28E-05    | 0.009462963  |
| g MGYG-HGUT-01850 | g Aspergillus                  | 0.062075536  | 0.093526367 | 0.472634203  |
| g MGYG-HGUT-01850 | g Kazachstania                 | -0.015561853 | 0.674447909 | 0.883307496  |
| g MGYG-HGUT-01850 | g Malassezia                   | 0.054896358  | 0.138124438 | 0.530937371  |
| g MGYG-HGUT-01850 | g unclassified Fungi           | 0.039343069  | 0.288094993 | 0.659568247  |
| g MGYG-HGUT-01850 | g Mycosphaerella               | -0.041081985 | 0.267300092 | 0.644908703  |
| g MGYG-HGUT-01850 | g Simplicillium                | 0.019981685  | 0.589628563 | 0.842338356  |
| g MGYG-HGUT-01850 | g unclassified Cordycipitaceae | 0.06093778   | 0.099704871 | 0.478320958  |
| g MGYG-HGUT-01850 | g unidentified                 | 0.001409012  | 0.969663525 | 0.988914748  |
| g UBA7102         | g Verticillium                 | 0.089387399  | 0.015628691 | 0.245072665  |
| g UBA7102         | g unclassified Tremellomycetes | -0.072044193 | 0.05152792  | 0.388828673  |
| g UBA7102         | g Candida                      | -0.026483512 | 0.474649181 | 0.776191877  |
| g UBA7102         | g Cladosporium                 | 0.022895875  | 0.536537309 | 0.813415158  |
| g UBA7102         | g Debaryomyces                 | -0.132157241 | 0.000339999 | 0.0321046    |
| g UBA7102         | g Aspergillus                  | 0.070621371  | 0.056325773 | 0.40436861   |
| g UBA7102         | g Kazachstania                 | -0.058335913 | 0.115055356 | 0.498084846  |
| g UBA7102         | g Malassezia                   | 0.061268634  | 0.097875587 | 0.477730381  |
| g UBA7102         | g unclassified Fungi           | 0.021279819  | 0.56568148  | 0.829091609  |
| g UBA7102         | g Mycosphaerella               | -0.040074594 | 0.279217984 | 0.656450724  |
| g UBA7102         | g Simplicillium                | -0.014147392 | 0.702559491 | 0.897342732  |
| g UBA7102         | g unclassified Cordycipitaceae | 0.064193651  | 0.082842973 | 0.455435557  |
| g UBA7102         | g unidentified                 | 0.023113482  | 0.532671334 | 0.811490628  |
| g MGYG-HGUT-01932 | g Verticillium                 | 0.038003532  | 0.304837744 | 0.670057703  |
| g MGYG-HGUT-01932 | g unclassified Tremellomycetes | -0.059714212 | 0.106707443 | 0.4877717626 |
| g MGYG-HGUT-01932 | g Candida                      | -0.013107137 | 0.723498841 | 0.905975597  |
| g MGYG-HGUT-01932 | g Cladosporium                 | 0.010269735  | 0.781630325 | 0.922249045  |
| g MGYG-HGUT-01932 | g Debaryomyces                 | -0.120727624 | 0.001073584 | 0.062177529  |
| g MGYG-HGUT-01932 | g Aspergillus                  | 0.062960896  | 0.088933743 | 0.465955266  |
| g MGYG-HGUT-01932 | g Kazachstania                 | -0.065565377 | 0.076466841 | 0.446713721  |



|                   |                                |              |             |             |
|-------------------|--------------------------------|--------------|-------------|-------------|
| g MGYG-HGUT-01932 | g Malassezia                   | 0.065091154  | 0.078624407 | 0.450732872 |
| g MGYG-HGUT-01932 | g unclassified Fungi           | 0.059316695  | 0.109064366 | 0.492300296 |
| g MGYG-HGUT-01932 | g Mycosphaerella               | -0.002892516 | 0.937771322 | 0.977568509 |
| g MGYG-HGUT-01932 | g Simplicillium                | 0.005732368  | 0.877040368 | 0.957972871 |
| g MGYG-HGUT-01932 | g unclassified Cordycipitaceae | 0.053272025  | 0.150186418 | 0.547270205 |
| g MGYG-HGUT-01932 | g unidentified                 | 0.099780611  | 0.006936172 | 0.158871363 |
| g MGYG-HGUT-02629 | g Verticillium                 | 0.058189939  | 0.115968696 | 0.499263933 |
| g MGYG-HGUT-02629 | g unclassified Tremellomycetes | -0.013540309 | 0.714753324 | 0.902925307 |
| g MGYG-HGUT-02629 | g Candida                      | -0.029292454 | 0.429063752 | 0.751274884 |
| g MGYG-HGUT-02629 | g Cladosporium                 | 0.104609321  | 0.004636579 | 0.133326839 |
| g MGYG-HGUT-02629 | g Debaryomyces                 | -0.101978907 | 0.005785728 | 0.146577642 |
| g MGYG-HGUT-02629 | g Aspergillus                  | 0.032909221  | 0.37427994  | 0.718546866 |
| g MGYG-HGUT-02629 | g Kazachstania                 | -0.037462356 | 0.311781067 | 0.672399691 |
| g MGYG-HGUT-02629 | g Malassezia                   | 0.066310104  | 0.073176025 | 0.443355619 |
| g MGYG-HGUT-02629 | g unclassified Fungi           | 0.056102284  | 0.129662035 | 0.517527876 |
| g MGYG-HGUT-02629 | g Mycosphaerella               | 0.024394076  | 0.510209046 | 0.798892628 |
| g MGYG-HGUT-02629 | g Simplicillium                | 0.009402888  | 0.799652746 | 0.929905946 |
| g MGYG-HGUT-02629 | g unclassified Cordycipitaceae | 0.106321609  | 0.004003827 | 0.124247781 |
| g MGYG-HGUT-02629 | g unidentified                 | 0.009144262  | 0.805050944 | 0.931596653 |
| g MGYG-HGUT-02681 | g Verticillium                 | 0.084442814  | 0.022415444 | 0.283321191 |
| g MGYG-HGUT-02681 | g unclassified Tremellomycetes | -0.077515802 | 0.036138777 | 0.337675685 |
| g MGYG-HGUT-02681 | g Candida                      | -0.005550323 | 0.880915699 | 0.95982057  |
| g MGYG-HGUT-02681 | g Cladosporium                 | 0.027182732  | 0.463059838 | 0.769075712 |
| g MGYG-HGUT-02681 | g Debaryomyces                 | -0.120166623 | 0.00113317  | 0.064817324 |
| g MGYG-HGUT-02681 | g Aspergillus                  | 0.064715232  | 0.080369638 | 0.45101344  |
| g MGYG-HGUT-02681 | g Kazachstania                 | -0.062664665 | 0.090449756 | 0.469185938 |
| g MGYG-HGUT-02681 | g Malassezia                   | 0.05843816   | 0.114418977 | 0.497329568 |
| g MGYG-HGUT-02681 | g unclassified Fungi           | 0.045494347  | 0.21923594  | 0.60663028  |
| g MGYG-HGUT-02681 | g Mycosphaerella               | -0.010053135 | 0.786123059 | 0.924326588 |
| g MGYG-HGUT-02681 | g Simplicillium                | 0.014122438  | 0.703059238 | 0.897655991 |
| g MGYG-HGUT-02681 | g unclassified Cordycipitaceae | 0.050890009  | 0.169302088 | 0.563866155 |
| g MGYG-HGUT-02681 | g unidentified                 | 0.041426732  | 0.263302936 | 0.641735044 |
| g GCA-900066905   | g Verticillium                 | 0.049485888  | 0.181392517 | 0.575010893 |
| g GCA-900066905   | g unclassified Tremellomycetes | -0.010930233 | 0.767975604 | 0.916616044 |
| g GCA-900066905   | g Candida                      | -5.52E-05    | 0.998811897 | 0.999189591 |
| g GCA-900066905   | g Cladosporium                 | 0.051908125  | 0.16092     | 0.557764638 |
| g GCA-900066905   | g Debaryomyces                 | -0.090377434 | 0.01451102  | 0.233367199 |
| g GCA-900066905   | g Aspergillus                  | 0.056714014  | 0.125525756 | 0.511677022 |
| g GCA-900066905   | g Kazachstania                 | -0.007941088 | 0.830282512 | 0.940630371 |
| g GCA-900066905   | g Malassezia                   | 0.028203616  | 0.446425353 | 0.761832544 |
| g GCA-900066905   | g unclassified Fungi           | 0.055301694  | 0.13523391  | 0.524661199 |
| g GCA-900066905   | g Mycosphaerella               | 0.055319351  | 0.135109066 | 0.524661199 |
| g GCA-900066905   | g Simplicillium                | -0.046436623 | 0.209829118 | 0.598807697 |
| g GCA-900066905   | g unclassified Cordycipitaceae | 0.066912518  | 0.070599466 | 0.439536772 |
| g GCA-900066905   | g unidentified                 | 0.013318223  | 0.719232549 | 0.904525696 |
| g MGYG-HGUT-00922 | g Verticillium                 | 0.074379756  | 0.044394143 | 0.366728198 |
| g MGYG-HGUT-00922 | g unclassified Tremellomycetes | -0.087671075 | 0.017746082 | 0.259019368 |
| g MGYG-HGUT-00922 | g Candida                      | -0.03309094  | 0.371646366 | 0.717884076 |
| g MGYG-HGUT-00922 | g Cladosporium                 | 0.028850959  | 0.436055742 | 0.755804366 |
| g MGYG-HGUT-00922 | g Debaryomyces                 | -0.097632448 | 0.008254339 | 0.17418732  |
| g MGYG-HGUT-00922 | g Aspergillus                  | 0.068934121  | 0.062490497 | 0.418263405 |
| g MGYG-HGUT-00922 | g Kazachstania                 | -0.026860695 | 0.468377845 | 0.77312422  |
| g MGYG-HGUT-00922 | g Malassezia                   | 0.032616204  | 0.378550684 | 0.721666439 |
| g MGYG-HGUT-00922 | g unclassified Fungi           | 0.033486166  | 0.365958268 | 0.714892079 |
| g MGYG-HGUT-00922 | g Mycosphaerella               | 0.043614938  | 0.238892286 | 0.622994378 |
| g MGYG-HGUT-00922 | g Simplicillium                | 0.007790212  | 0.833459439 | 0.941769117 |
| g MGYG-HGUT-00922 | g unclassified Cordycipitaceae | 0.091796018  | 0.013032253 | 0.221742805 |
| g MGYG-HGUT-00922 | g unidentified                 | 0.037370446  | 0.312970532 | 0.672953429 |
| g CAG-41          | g Verticillium                 | 0.076749145  | 0.038025752 | 0.343232686 |
| g CAG-41          | g unclassified Tremellomycetes | -0.055642448 | 0.132840199 | 0.521431795 |
| g CAG-41          | g Candida                      | -0.044937233 | 0.22493782  | 0.612060698 |
| g CAG-41          | g Cladosporium                 | -0.006629195 | 0.857993559 | 0.952106527 |
| g CAG-41          | g Debaryomyces                 | -0.108829699 | 0.003217572 | 0.111269104 |
| g CAG-41          | g Aspergillus                  | 0.001699313  | 0.963417257 | 0.986728747 |
| g CAG-41          | g Kazachstania                 | -0.013877669 | 0.707967926 | 0.900771504 |
| g CAG-41          | g Malassezia                   | -0.008097162 | 0.826999057 | 0.939989934 |
| g CAG-41          | g unclassified Fungi           | 0.011025064  | 0.766020904 | 0.916246548 |
| g CAG-41          | g Mycosphaerella               | -0.023692973 | 0.522445221 | 0.805852786 |
| g CAG-41          | g Simplicillium                | -0.003405752 | 0.926758386 | 0.974172444 |
| g CAG-41          | g unclassified Cordycipitaceae | 0.031002485  | 0.402603089 | 0.736829105 |
| g CAG-41          | g unidentified                 | 0.014517218  | 0.695168197 | 0.894923341 |
| g UBA4716         | g Verticillium                 | 0.069111916  | 0.061815694 | 0.416988935 |
| g UBA4716         | g unclassified Tremellomycetes | -0.076788296 | 0.037927402 | 0.343160371 |
| g UBA4716         | g Candida                      | -0.045675409 | 0.217405321 | 0.60514212  |
| g UBA4716         | g Cladosporium                 | 0.012631188  | 0.733149692 | 0.907315107 |
| g UBA4716         | g Debaryomyces                 | -0.131993866 | 0.000345863 | 0.0321046   |
| g UBA4716         | g Aspergillus                  | -0.007873019 | 0.831715488 | 0.941179837 |
| g UBA4716         | g Kazachstania                 | -0.02683648  | 0.468779077 | 0.77312422  |

|                   |                                |              |             |             |
|-------------------|--------------------------------|--------------|-------------|-------------|
| g UBA4716         | g Malassezia                   | 0.050525013  | 0.17238534  | 0.566309615 |
| g UBA4716         | g unclassified Fungi           | -0.017861553 | 0.629710016 | 0.859818244 |
| g UBA4716         | g Mycosphaerella               | -0.016900627 | 0.648251153 | 0.869649303 |
| g UBA4716         | g Simplicillium                | -0.025694947 | 0.487907864 | 0.783353899 |
| g UBA4716         | g unclassified Cordycipitaceae | 0.054627469  | 0.140068004 | 0.533896229 |
| g UBA4716         | g unidentified                 | -0.009150497 | 0.804920703 | 0.931596653 |
| g MGYG-HGUT-02758 | g Verticillium                 | 0.079759928  | 0.031066826 | 0.318555378 |
| g MGYG-HGUT-02758 | g unclassified Tremellomycetes | -0.092251786 | 0.01258624  | 0.219768851 |
| g MGYG-HGUT-02758 | g Candida                      | -0.029771697 | 0.421548098 | 0.746456153 |
| g MGYG-HGUT-02758 | g Cladosporium                 | -0.008515399 | 0.818215239 | 0.936487497 |
| g MGYG-HGUT-02758 | g Debaryomyces                 | -0.087953606 | 0.017381159 | 0.257239636 |
| g MGYG-HGUT-02758 | g Aspergillus                  | -0.013639728 | 0.712751324 | 0.902091837 |
| g MGYG-HGUT-02758 | g Kazachstania                 | -0.025986739 | 0.482978655 | 0.780449413 |
| g MGYG-HGUT-02758 | g Malassezia                   | 0.051534128  | 0.163961974 | 0.561723687 |
| g MGYG-HGUT-02758 | g unclassified Fungi           | 0.005831681  | 0.874927454 | 0.957673757 |
| g MGYG-HGUT-02758 | g Mycosphaerella               | 0.015940666  | 0.666993605 | 0.879421986 |
| g MGYG-HGUT-02758 | g Simplicillium                | 0.014198157  | 0.701543224 | 0.897212331 |
| g MGYG-HGUT-02758 | g unclassified Cordycipitaceae | 0.082375585  | 0.025936292 | 0.29962646  |
| g MGYG-HGUT-02758 | g unidentified                 | 0.051399159  | 0.165070326 | 0.562434723 |
| g UBA1381         | g Verticillium                 | 0.025936142  | 0.483831444 | 0.780949412 |
| g UBA1381         | g unclassified Tremellomycetes | -0.038541114 | 0.298042696 | 0.666157944 |
| g UBA1381         | g Candida                      | -0.057737878 | 0.118833282 | 0.50259544  |
| g UBA1381         | g Cladosporium                 | 0.046796998  | 0.206309668 | 0.595517977 |
| g UBA1381         | g Debaryomyces                 | -0.059847071 | 0.105928749 | 0.486782157 |
| g UBA1381         | g Aspergillus                  | -0.024931214 | 0.500936742 | 0.792363619 |
| g UBA1381         | g Kazachstania                 | -0.01947106  | 0.599174357 | 0.846523771 |
| g UBA1381         | g Malassezia                   | 0.033835642  | 0.360974021 | 0.711747526 |
| g UBA1381         | g unclassified Fungi           | 0.02604783   | 0.481950069 | 0.780189053 |
| g UBA1381         | g Mycosphaerella               | 0.004884741  | 0.895108032 | 0.96495896  |
| g UBA1381         | g Simplicillium                | -0.025282016 | 0.494929497 | 0.787688967 |
| g UBA1381         | g unclassified Cordycipitaceae | 0.036477502  | 0.324681721 | 0.681162168 |
| g UBA1381         | g unidentified                 | -0.034417032 | 0.352776875 | 0.704818603 |
| g MGYG-HGUT-01101 | g Verticillium                 | 0.043641388  | 0.23860731  | 0.622994378 |
| g MGYG-HGUT-01101 | g unclassified Tremellomycetes | -0.072244769 | 0.050879845 | 0.386511499 |
| g MGYG-HGUT-01101 | g Candida                      | -0.012212217 | 0.741680241 | 0.909439202 |
| g MGYG-HGUT-01101 | g Cladosporium                 | 0.011627156  | 0.753645466 | 0.911378102 |
| g MGYG-HGUT-01101 | g Debaryomyces                 | -0.056313324 | 0.128223297 | 0.51521926  |
| g MGYG-HGUT-01101 | g Aspergillus                  | 0.008174111  | 0.825381306 | 0.939308882 |
| g MGYG-HGUT-01101 | g Kazachstania                 | -0.031621026 | 0.393277637 | 0.730757316 |
| g MGYG-HGUT-01101 | g Malassezia                   | 0.061007793  | 0.099315519 | 0.478320958 |
| g MGYG-HGUT-01101 | g unclassified Fungi           | -0.02284207  | 0.537495379 | 0.813920136 |
| g MGYG-HGUT-01101 | g Mycosphaerella               | -0.013207603 | 0.721467221 | 0.905336886 |
| g MGYG-HGUT-01101 | g Simplicillium                | 0.020035615  | 0.588624477 | 0.84196056  |
| g MGYG-HGUT-01101 | g unclassified Cordycipitaceae | 0.114920747  | 0.001857537 | 0.084362455 |
| g MGYG-HGUT-01101 | g unidentified                 | -0.026568063 | 0.473239383 | 0.775204203 |
| g MGYG-HGUT-03595 | g Verticillium                 | 0.059689939  | 0.106850197 | 0.487777626 |
| g MGYG-HGUT-03595 | g unclassified Tremellomycetes | -0.100578412 | 0.006496867 | 0.152777435 |
| g MGYG-HGUT-03595 | g Candida                      | -0.02711899  | 0.464109781 | 0.769902759 |
| g MGYG-HGUT-03595 | g Cladosporium                 | 0.049514386  | 0.181140936 | 0.575010893 |
| g MGYG-HGUT-03595 | g Debaryomyces                 | -0.170753236 | 3.44E-06    | 0.007271099 |
| g MGYG-HGUT-03595 | g Aspergillus                  | 0.057223926  | 0.122156971 | 0.506577845 |
| g MGYG-HGUT-03595 | g Kazachstania                 | -0.065041802 | 0.078851755 | 0.45101344  |
| g MGYG-HGUT-03595 | g Malassezia                   | 0.030075413  | 0.416825263 | 0.744290485 |
| g MGYG-HGUT-03595 | g unclassified Fungi           | 0.062996324  | 0.088753807 | 0.465955266 |
| g MGYG-HGUT-03595 | g Mycosphaerella               | 0.000194357  | 0.995814439 | 0.998172624 |
| g MGYG-HGUT-03595 | g Simplicillium                | 0.034268717  | 0.354856748 | 0.705850547 |
| g MGYG-HGUT-03595 | g unclassified Cordycipitaceae | 0.086790118  | 0.018927307 | 0.26705169  |
| g MGYG-HGUT-03595 | g unidentified                 | 0.048784491  | 0.187666342 | 0.577701512 |
| g Monoglobus      | g Verticillium                 | 0.057178807  | 0.122452185 | 0.506761447 |
| g Monoglobus      | g unclassified Tremellomycetes | 0.011002216  | 0.766491728 | 0.916448466 |
| g Monoglobus      | g Candida                      | -0.028623007 | 0.439691348 | 0.758246834 |
| g Monoglobus      | g Cladosporium                 | -0.001815917 | 0.960908944 | 0.985590622 |
| g Monoglobus      | g Debaryomyces                 | -0.06961374  | 0.059943478 | 0.412830947 |
| g Monoglobus      | g Aspergillus                  | 0.005879953  | 0.873900775 | 0.957437473 |
| g Monoglobus      | g Kazachstania                 | -0.043209326 | 0.243292454 | 0.627167052 |
| g Monoglobus      | g Malassezia                   | 0.065412325  | 0.077157852 | 0.448667857 |
| g Monoglobus      | g unclassified Fungi           | 0.040221231  | 0.277461127 | 0.654488559 |
| g Monoglobus      | g Mycosphaerella               | -0.017769586 | 0.631474735 | 0.860229872 |
| g Monoglobus      | g Simplicillium                | 0.021197543  | 0.567185317 | 0.830212925 |
| g Monoglobus      | g unclassified Cordycipitaceae | 0.058065615  | 0.116751047 | 0.500388653 |
| g Monoglobus      | g unidentified                 | -0.013463834 | 0.716294649 | 0.903168431 |
| g MGYG-HGUT-01817 | g Verticillium                 | 0.057812896  | 0.118354117 | 0.502487018 |
| g MGYG-HGUT-01817 | g unclassified Tremellomycetes | -0.05502237  | 0.13382115  | 0.522487595 |
| g MGYG-HGUT-01817 | g Candida                      | -0.008842019 | 0.811371307 | 0.934113162 |
| g MGYG-HGUT-01817 | g Cladosporium                 | 0.020139352  | 0.586695279 | 0.840897769 |
| g MGYG-HGUT-01817 | g Debaryomyces                 | -0.139711012 | 0.000150948 | 0.019966662 |
| g MGYG-HGUT-01817 | g Aspergillus                  | -0.005365799 | 0.884846726 | 0.961818704 |
| g MGYG-HGUT-01817 | g Kazachstania                 | -0.040328005 | 0.276186607 | 0.65368076  |

|                   |                                |              |             |             |
|-------------------|--------------------------------|--------------|-------------|-------------|
| g MGYG-HGUT-01817 | g Malassezia                   | 0.033631066  | 0.363886526 | 0.713515619 |
| g MGYG-HGUT-01817 | g unclassified Fungi           | 0.064709778  | 0.080395189 | 0.45101344  |
| g MGYG-HGUT-01817 | g Mycosphaerella               | -0.012015839 | 0.745689631 | 0.909574751 |
| g MGYG-HGUT-01817 | g Simplicillium                | 0.035735873  | 0.334621986 | 0.690008638 |
| g MGYG-HGUT-01817 | g unclassified Cordycipitaceae | 0.058415599  | 0.11455916  | 0.497441538 |
| g MGYG-HGUT-01817 | g unidentified                 | 0.02867991   | 0.438782172 | 0.757620775 |
| g MGYG-HGUT-00706 | g Verticillium                 | 0.04142557   | 0.263316345 | 0.641735044 |
| g MGYG-HGUT-00706 | g unclassified Tremellomycetes | -0.119986588 | 0.001152929 | 0.0648952   |
| g MGYG-HGUT-00706 | g Candida                      | -0.02514989  | 0.497187545 | 0.78950698  |
| g MGYG-HGUT-00706 | g Cladosporium                 | 0.000869078  | 0.981285687 | 0.993008299 |
| g MGYG-HGUT-00706 | g Debaryomyces                 | -0.121819257 | 0.000965846 | 0.05906749  |
| g MGYG-HGUT-00706 | g Aspergillus                  | 0.034009464  | 0.358510862 | 0.709520182 |
| g MGYG-HGUT-00706 | g Kazachstania                 | -0.021726358 | 0.557553152 | 0.823796071 |
| g MGYG-HGUT-00706 | g Malassezia                   | 0.006925643  | 0.851715135 | 0.949400054 |
| g MGYG-HGUT-00706 | g unclassified Fungi           | -0.019860811 | 0.591881902 | 0.843006984 |
| g MGYG-HGUT-00706 | g Mycosphaerella               | 0.004751195  | 0.897959833 | 0.965279455 |
| g MGYG-HGUT-00706 | g Simplicillium                | -0.025511578 | 0.491019301 | 0.785245012 |
| g MGYG-HGUT-00706 | g unclassified Cordycipitaceae | 0.040629925  | 0.272604294 | 0.649853264 |
| g MGYG-HGUT-00706 | g unidentified                 | 0.070548546  | 0.056581009 | 0.404484002 |
| g MGYG-HGUT-02685 | g Verticillium                 | 0.026206488  | 0.479284348 | 0.780189053 |
| g MGYG-HGUT-02685 | g unclassified Tremellomycetes | -0.071049342 | 0.054845077 | 0.400015015 |
| g MGYG-HGUT-02685 | g Candida                      | -0.0318269   | 0.390202964 | 0.72965864  |
| g MGYG-HGUT-02685 | g Cladosporium                 | -0.013437721 | 0.716821206 | 0.903293001 |
| g MGYG-HGUT-02685 | g Debaryomyces                 | -0.120018215 | 0.001149435 | 0.0648952   |
| g MGYG-HGUT-02685 | g Aspergillus                  | 0.011594709  | 0.754310803 | 0.91153556  |
| g MGYG-HGUT-02685 | g Kazachstania                 | -0.022897264 | 0.536512597 | 0.813415158 |
| g MGYG-HGUT-02685 | g Malassezia                   | 0.039009547  | 0.292204637 | 0.660929744 |
| g MGYG-HGUT-02685 | g unclassified Fungi           | -0.027798495 | 0.452985499 | 0.765162867 |
| g MGYG-HGUT-02685 | g Mycosphaerella               | 0.044675284  | 0.227655027 | 0.612967811 |
| g MGYG-HGUT-02685 | g Simplicillium                | -0.015122036 | 0.683142761 | 0.88786744  |
| g MGYG-HGUT-02685 | g unclassified Cordycipitaceae | 0.03859629   | 0.297351021 | 0.665940424 |
| g MGYG-HGUT-02685 | g unidentified                 | 0.02903113   | 0.433194474 | 0.754104067 |
| g UBA9506         | g Verticillium                 | 0.067570615  | 0.067870115 | 0.434755158 |
| g UBA9506         | g unclassified Tremellomycetes | -0.09585917  | 0.009506415 | 0.187680749 |
| g UBA9506         | g Candida                      | -0.06864228  | 0.06361132  | 0.421193    |
| g UBA9506         | g Cladosporium                 | 0.029673854  | 0.423076207 | 0.746980426 |
| g UBA9506         | g Debaryomyces                 | -0.140657345 | 0.000135946 | 0.018928692 |
| g UBA9506         | g Aspergillus                  | 0.018187408  | 0.623474376 | 0.856841954 |
| g UBA9506         | g Kazachstania                 | -0.033238667 | 0.3695139   | 0.71692327  |
| g UBA9506         | g Malassezia                   | 0.036911824  | 0.318950372 | 0.676514899 |
| g UBA9506         | g unclassified Fungi           | -0.008284129 | 0.823069621 | 0.938547708 |
| g UBA9506         | g Mycosphaerella               | -0.015934696 | 0.66711083  | 0.879421986 |
| g UBA9506         | g Simplicillium                | 0.0011689    | 0.974831315 | 0.990490577 |
| g UBA9506         | g unclassified Cordycipitaceae | 0.094799905  | 0.010332534 | 0.1959478   |
| g UBA9506         | g unidentified                 | 0.0513066    | 0.165833653 | 0.562504371 |
| g MGYG-HGUT-02683 | g Verticillium                 | 0.0178945    | 0.629078325 | 0.859818244 |
| g MGYG-HGUT-02683 | g unclassified Tremellomycetes | -0.086548758 | 0.019262675 | 0.268956611 |
| g MGYG-HGUT-02683 | g Candida                      | -0.035256557 | 0.341149432 | 0.694699556 |
| g MGYG-HGUT-02683 | g Cladosporium                 | 0.02167835   | 0.558424311 | 0.82456557  |
| g MGYG-HGUT-02683 | g Debaryomyces                 | -0.132951138 | 0.000312799 | 0.031056454 |
| g MGYG-HGUT-02683 | g Aspergillus                  | 0.008925582  | 0.809622628 | 0.933584001 |
| g MGYG-HGUT-02683 | g Kazachstania                 | -0.033198186 | 0.370097494 | 0.71692327  |
| g MGYG-HGUT-02683 | g Malassezia                   | 0.054313471  | 0.142364117 | 0.537267149 |
| g MGYG-HGUT-02683 | g unclassified Fungi           | 0.008814746  | 0.811942247 | 0.934113162 |
| g MGYG-HGUT-02683 | g Mycosphaerella               | -0.013549993 | 0.714558239 | 0.902925307 |
| g MGYG-HGUT-02683 | g Simplicillium                | -0.03439987  | 0.353017158 | 0.704818603 |
| g MGYG-HGUT-02683 | g unclassified Cordycipitaceae | 0.011802677  | 0.750049485 | 0.910387945 |
| g MGYG-HGUT-02683 | g unidentified                 | 0.06322425   | 0.087603196 | 0.465488609 |
| g MGYG-HGUT-01024 | g Verticillium                 | -0.022432588 | 0.544814673 | 0.816215242 |
| g MGYG-HGUT-01024 | g unclassified Tremellomycetes | 0.010248518  | 0.782070093 | 0.922260522 |
| g MGYG-HGUT-01024 | g Candida                      | -0.009529705 | 0.797009224 | 0.929238701 |
| g MGYG-HGUT-01024 | g Cladosporium                 | -0.022685746 | 0.540283776 | 0.815420595 |
| g MGYG-HGUT-01024 | g Debaryomyces                 | -0.000467998 | 0.989921698 | 0.996055991 |
| g MGYG-HGUT-01024 | g Aspergillus                  | -0.074256474 | 0.044748725 | 0.367648298 |
| g MGYG-HGUT-01024 | g Kazachstania                 | -0.046288122 | 0.211291938 | 0.600680647 |
| g MGYG-HGUT-01024 | g Malassezia                   | 0.008746755  | 0.813365987 | 0.934430449 |
| g MGYG-HGUT-01024 | g unclassified Fungi           | -0.024170399 | 0.514096518 | 0.801439209 |
| g MGYG-HGUT-01024 | g Mycosphaerella               | -0.034004439 | 0.358581925 | 0.709520182 |
| g MGYG-HGUT-01024 | g Simplicillium                | -0.019274608 | 0.602865421 | 0.848214003 |
| g MGYG-HGUT-01024 | g unclassified Cordycipitaceae | -0.018848671 | 0.610903062 | 0.851291399 |
| g MGYG-HGUT-01024 | g unidentified                 | -0.039848839 | 0.281937482 | 0.657094722 |
| g MGYG-HGUT-00495 | g Verticillium                 | 0.063026225  | 0.088602175 | 0.465955266 |
| g MGYG-HGUT-00495 | g unclassified Tremellomycetes | -0.062958513 | 0.088945853 | 0.465955266 |
| g MGYG-HGUT-00495 | g Candida                      | -0.040702943 | 0.271742706 | 0.649109772 |
| g MGYG-HGUT-00495 | g Cladosporium                 | 0.011792516  | 0.750257512 | 0.910387945 |
| g MGYG-HGUT-00495 | g Debaryomyces                 | -0.110386572 | 0.002803017 | 0.101233889 |
| g MGYG-HGUT-00495 | g Aspergillus                  | 0.053023323  | 0.152101927 | 0.549144523 |
| g MGYG-HGUT-00495 | g Kazachstania                 | -0.03390854  | 0.35993973  | 0.711275859 |

|                   |                                |              |             |             |
|-------------------|--------------------------------|--------------|-------------|-------------|
| g MGYG-HGUT-00495 | g Malassezia                   | 0.071584699  | 0.053038592 | 0.395249564 |
| g MGYG-HGUT-00495 | g unclassified Fungi           | 0.051493815  | 0.164292436 | 0.561723687 |
| g MGYG-HGUT-00495 | g Mycosphaerella               | -0.017801512 | 0.630861877 | 0.860229872 |
| g MGYG-HGUT-00495 | g Simplicillium                | 0.040711727  | 0.271639191 | 0.649109772 |
| g MGYG-HGUT-00495 | g unclassified Cordycipitaceae | 0.062824275  | 0.089630368 | 0.467278702 |
| g MGYG-HGUT-00495 | g unidentified                 | 0.082615934  | 0.025503814 | 0.296247379 |
| g MGYG-HGUT-04133 | g Verticillium                 | 0.035909631  | 0.332275676 | 0.687955626 |
| g MGYG-HGUT-04133 | g unclassified Tremellomycetes | -0.089027561 | 0.016053262 | 0.248402621 |
| g MGYG-HGUT-04133 | g Candida                      | -0.054194132 | 0.143244312 | 0.538440191 |
| g MGYG-HGUT-04133 | g Cladosporium                 | 0.009635056  | 0.794814898 | 0.928234328 |
| g MGYG-HGUT-04133 | g Debaryomyces                 | -0.13745692  | 0.000193179 | 0.022968808 |
| g MGYG-HGUT-04133 | g Aspergillus                  | 0.069490393  | 0.060399256 | 0.412830947 |
| g MGYG-HGUT-04133 | g Kazachstania                 | -0.061161486 | 0.098465053 | 0.477955684 |
| g MGYG-HGUT-04133 | g Malassezia                   | 0.024838919  | 0.502523605 | 0.793568839 |
| g MGYG-HGUT-04133 | g unclassified Fungi           | 0.036915994  | 0.318895657 | 0.676514899 |
| g MGYG-HGUT-04133 | g Mycosphaerella               | -0.03170624  | 0.392003222 | 0.730055982 |
| g MGYG-HGUT-04133 | g Simplicillium                | 0.012301501  | 0.739859656 | 0.908870682 |
| g MGYG-HGUT-04133 | g unclassified Cordycipitaceae | 0.05382311   | 0.146007428 | 0.540957635 |
| g MGYG-HGUT-04133 | g unidentified                 | 0.026378794  | 0.476398431 | 0.777970401 |
| g MGYG-HGUT-01903 | g Verticillium                 | 0.072500623  | 0.050063067 | 0.385192726 |
| g MGYG-HGUT-01903 | g unclassified Tremellomycetes | -0.141429539 | 0.000124755 | 0.018859411 |
| g MGYG-HGUT-01903 | g Candida                      | -0.045566137 | 0.218508786 | 0.60636786  |
| g MGYG-HGUT-01903 | g Cladosporium                 | 0.009151458  | 0.804900619 | 0.931596653 |
| g MGYG-HGUT-01903 | g Debaryomyces                 | -0.14913231  | 5.17E-05    | 0.013389478 |
| g MGYG-HGUT-01903 | g Aspergillus                  | 0.040971228  | 0.268593053 | 0.645672805 |
| g MGYG-HGUT-01903 | g Kazachstania                 | -0.039670455 | 0.284098974 | 0.658002559 |
| g MGYG-HGUT-01903 | g Malassezia                   | 0.065221491  | 0.078026546 | 0.450222934 |
| g MGYG-HGUT-01903 | g unclassified Fungi           | 0.04251389   | 0.250968349 | 0.632257147 |
| g MGYG-HGUT-01903 | g Mycosphaerella               | -0.009956013 | 0.788139903 | 0.925277255 |
| g MGYG-HGUT-01903 | g Simplicillium                | 0.021290226  | 0.565491404 | 0.829042676 |
| g MGYG-HGUT-01903 | g unclassified Cordycipitaceae | 0.047129088  | 0.203104513 | 0.593060693 |
| g MGYG-HGUT-01903 | g unidentified                 | 0.033095262  | 0.371583871 | 0.717884076 |
| g MGYG-HGUT-04193 | g Verticillium                 | 0.0233727    | 0.528084513 | 0.808944748 |
| g MGYG-HGUT-04193 | g unclassified Tremellomycetes | -0.055750055 | 0.132091134 | 0.520016102 |
| g MGYG-HGUT-04193 | g Candida                      | -0.032941788 | 0.373807113 | 0.718484102 |
| g MGYG-HGUT-04193 | g Cladosporium                 | 0.02798353   | 0.4499825   | 0.763462372 |
| g MGYG-HGUT-04193 | g Debaryomyces                 | -0.16016802  | 1.35E-05    | 0.008626179 |
| g MGYG-HGUT-04193 | g Aspergillus                  | 0.065601812  | 0.076303085 | 0.446713721 |
| g MGYG-HGUT-04193 | g Kazachstania                 | -0.051982323 | 0.160321593 | 0.557261178 |
| g MGYG-HGUT-04193 | g Malassezia                   | 0.00443883   | 0.904635327 | 0.967483304 |
| g MGYG-HGUT-04193 | g unclassified Fungi           | 0.0314352    | 0.396065435 | 0.732270187 |
| g MGYG-HGUT-04193 | g Mycosphaerella               | -0.02450947  | 0.50820955  | 0.798377888 |
| g MGYG-HGUT-04193 | g Simplicillium                | 0.017445369  | 0.637712644 | 0.863812758 |
| g MGYG-HGUT-04193 | g unclassified Cordycipitaceae | 0.034199792  | 0.355825941 | 0.706489987 |
| g MGYG-HGUT-04193 | g unidentified                 | 0.042347231  | 0.252832641 | 0.633848615 |
| g MGYG-HGUT-00674 | g Verticillium                 | 0.058479884  | 0.114160086 | 0.497329568 |
| g MGYG-HGUT-00674 | g unclassified Tremellomycetes | -0.097757034 | 0.008172177 | 0.173650557 |
| g MGYG-HGUT-00674 | g Candida                      | -0.021741063 | 0.557286451 | 0.82366348  |
| g MGYG-HGUT-00674 | g Cladosporium                 | 0.007259133  | 0.844663416 | 0.947649307 |
| g MGYG-HGUT-00674 | g Debaryomyces                 | -0.115262891 | 0.001799688 | 0.083377853 |
| g MGYG-HGUT-00674 | g Aspergillus                  | -0.002178519 | 0.953111479 | 0.98283236  |
| g MGYG-HGUT-00674 | g Kazachstania                 | -0.045550767 | 0.218664323 | 0.606447136 |
| g MGYG-HGUT-00674 | g Malassezia                   | 0.046241518  | 0.211752523 | 0.600680647 |
| g MGYG-HGUT-00674 | g unclassified Fungi           | -0.001185681 | 0.974470129 | 0.990490577 |
| g MGYG-HGUT-00674 | g Mycosphaerella               | -0.071331625 | 0.053886274 | 0.397628223 |
| g MGYG-HGUT-00674 | g Simplicillium                | 0.083687102  | 0.023651267 | 0.286686945 |
| g MGYG-HGUT-00674 | g unclassified Cordycipitaceae | 0.019487534  | 0.598865309 | 0.846523771 |
| g MGYG-HGUT-00674 | g unidentified                 | -0.014519548 | 0.695121737 | 0.894923341 |
| g MGYG-HGUT-04157 | g Verticillium                 | 0.050833511  | 0.169776631 | 0.564474357 |
| g MGYG-HGUT-04157 | g unclassified Tremellomycetes | 0.015461745  | 0.676423199 | 0.884589212 |
| g MGYG-HGUT-04157 | g Candida                      | -0.044944016 | 0.224867769 | 0.612060698 |
| g MGYG-HGUT-04157 | g Cladosporium                 | 0.036504755  | 0.324320125 | 0.680794164 |
| g MGYG-HGUT-04157 | g Debaryomyces                 | -0.041862681 | 0.258307541 | 0.637604478 |
| g MGYG-HGUT-04157 | g Aspergillus                  | -0.004691217 | 0.899241077 | 0.965773782 |
| g MGYG-HGUT-04157 | g Kazachstania                 | -0.009231297 | 0.803233255 | 0.931173993 |
| g MGYG-HGUT-04157 | g Malassezia                   | 0.037562958  | 0.310482524 | 0.672399691 |
| g MGYG-HGUT-04157 | g unclassified Fungi           | -9.99E-05    | 0.997848651 | 0.998643711 |
| g MGYG-HGUT-04157 | g Mycosphaerella               | -0.01502471  | 0.685072563 | 0.889048376 |
| g MGYG-HGUT-04157 | g Simplicillium                | -0.05984511  | 0.10594021  | 0.486782157 |
| g MGYG-HGUT-04157 | g unclassified Cordycipitaceae | 0.063475158  | 0.086350486 | 0.462663716 |
| g MGYG-HGUT-04157 | g unidentified                 | -0.013357359 | 0.71844251  | 0.903667971 |
| g MGYG-HGUT-04072 | g Verticillium                 | 0.070540459  | 0.056609413 | 0.404484002 |
| g MGYG-HGUT-04072 | g unclassified Tremellomycetes | -0.107293469 | 0.00368054  | 0.120587953 |
| g MGYG-HGUT-04072 | g Candida                      | -0.095932317 | 0.0094516   | 0.187297431 |
| g MGYG-HGUT-04072 | g Cladosporium                 | -0.008327176 | 0.822165556 | 0.938123346 |
| g MGYG-HGUT-04072 | g Debaryomyces                 | -0.138707063 | 0.000168556 | 0.02175193  |
| g MGYG-HGUT-04072 | g Aspergillus                  | 0.032221496  | 0.384350689 | 0.725207645 |
| g MGYG-HGUT-04072 | g Kazachstania                 | -0.064604925 | 0.080887662 | 0.452126167 |



|                   |                                |              |             |             |
|-------------------|--------------------------------|--------------|-------------|-------------|
| g MGYG-HGUT-04072 | g Malassezia                   | 0.034977467  | 0.344987368 | 0.696679266 |
| g MGYG-HGUT-04072 | g unclassified Fungi           | 0.049614857  | 0.180256028 | 0.575003251 |
| g MGYG-HGUT-04072 | g Mycosphaerella               | -0.019657571 | 0.595679568 | 0.845161968 |
| g MGYG-HGUT-04072 | g Simplicillium                | 0.029669927  | 0.423137616 | 0.746980426 |
| g MGYG-HGUT-04072 | g unclassified Cordycipitaceae | 0.057826634  | 0.118266537 | 0.502487018 |
| g MGYG-HGUT-04072 | g unidentified                 | 0.0589689    | 0.11116001  | 0.494471808 |
| g MGYG-HGUT-01896 | g Verticillium                 | 0.05815897   | 0.116163189 | 0.499487551 |
| g MGYG-HGUT-01896 | g unclassified Tremellomycetes | -0.12164431  | 0.000982411 | 0.05906749  |
| g MGYG-HGUT-01896 | g Candida                      | -0.05987784  | 0.105749056 | 0.486749242 |
| g MGYG-HGUT-01896 | g Cladosporium                 | 0.043681453  | 0.238176104 | 0.622892944 |
| g MGYG-HGUT-01896 | g Debaryomyces                 | -0.142128561 | 0.000115377 | 0.018409489 |
| g MGYG-HGUT-01896 | g Aspergillus                  | 0.063732186  | 0.085082232 | 0.459591722 |
| g MGYG-HGUT-01896 | g Kazachstania                 | -0.051489337 | 0.164329175 | 0.561723687 |
| g MGYG-HGUT-01896 | g Malassezia                   | 0.111099156  | 0.002630032 | 0.097996477 |
| g MGYG-HGUT-01896 | g unclassified Fungi           | 0.035576768  | 0.336779756 | 0.691597784 |
| g MGYG-HGUT-01896 | g Mycosphaerella               | 0.031298314  | 0.398126617 | 0.733431989 |
| g MGYG-HGUT-01896 | g Simplicillium                | 0.004396921  | 0.905531478 | 0.967814776 |
| g MGYG-HGUT-01896 | g unclassified Cordycipitaceae | 0.063101398  | 0.088221874 | 0.465955266 |
| g MGYG-HGUT-01896 | g unidentified                 | 0.076185549  | 0.039465691 | 0.349272046 |
| g MGYG-HGUT-03068 | g Verticillium                 | 0.042158217  | 0.254958624 | 0.635347198 |
| g MGYG-HGUT-03068 | g unclassified Tremellomycetes | -0.046390941 | 0.21027833  | 0.598977875 |
| g MGYG-HGUT-03068 | g Candida                      | -0.075925182 | 0.040146349 | 0.350685903 |
| g MGYG-HGUT-03068 | g Cladosporium                 | 0.009151556  | 0.804898581 | 0.931596653 |
| g MGYG-HGUT-03068 | g Debaryomyces                 | 0.007816148  | 0.832913138 | 0.94166496  |
| g MGYG-HGUT-03068 | g Aspergillus                  | 0.008818132  | 0.811871353 | 0.934113162 |
| g MGYG-HGUT-03068 | g Kazachstania                 | -0.036867081 | 0.31953773  | 0.677217756 |
| g MGYG-HGUT-03068 | g Malassezia                   | 0.034867068  | 0.346513085 | 0.697873429 |
| g MGYG-HGUT-03068 | g unclassified Fungi           | -0.086204807 | 0.019749544 | 0.270879604 |
| g MGYG-HGUT-03068 | g Mycosphaerella               | 0.0366075    | 0.322959286 | 0.67956953  |
| g MGYG-HGUT-03068 | g Simplicillium                | 0.049501033  | 0.181258786 | 0.575010893 |
| g MGYG-HGUT-03068 | g unclassified Cordycipitaceae | 0.075388205  | 0.041581547 | 0.35599994  |
| g MGYG-HGUT-03068 | g unidentified                 | 0.028534402  | 0.441109172 | 0.75910048  |
| g MGYG-HGUT-00890 | g Verticillium                 | 0.069567759  | 0.060113045 | 0.412830947 |
| g MGYG-HGUT-00890 | g unclassified Tremellomycetes | -0.001966812 | 0.957663581 | 0.984847119 |
| g MGYG-HGUT-00890 | g Candida                      | -0.084582268 | 0.022193624 | 0.283296652 |
| g MGYG-HGUT-00890 | g Cladosporium                 | 0.056439046  | 0.127372106 | 0.514840192 |
| g MGYG-HGUT-00890 | g Debaryomyces                 | -0.114671785 | 0.001900696 | 0.084840998 |
| g MGYG-HGUT-00890 | g Aspergillus                  | -0.001534243 | 0.966968734 | 0.988470889 |
| g MGYG-HGUT-00890 | g Kazachstania                 | -0.027036531 | 0.465469972 | 0.771433555 |
| g MGYG-HGUT-00890 | g Malassezia                   | 0.071856656  | 0.052140086 | 0.391587216 |
| g MGYG-HGUT-00890 | g unclassified Fungi           | 0.006131893  | 0.868545815 | 0.955273867 |
| g MGYG-HGUT-00890 | g Mycosphaerella               | -0.021205184 | 0.56704559  | 0.830171061 |
| g MGYG-HGUT-00890 | g Simplicillium                | 0.06265209   | 0.090514567 | 0.469292084 |
| g MGYG-HGUT-00890 | g unclassified Cordycipitaceae | 0.132563835  | 0.000325804 | 0.031725778 |
| g MGYG-HGUT-00890 | g unidentified                 | 0.000765468  | 0.983516447 | 0.993484837 |
| g MGYG-HGUT-03943 | g Verticillium                 | 0.044226463  | 0.232364754 | 0.617638717 |
| g MGYG-HGUT-03943 | g unclassified Tremellomycetes | -0.077612879 | 0.035905622 | 0.337275497 |
| g MGYG-HGUT-03943 | g Candida                      | -0.094499554 | 0.010578098 | 0.19882314  |
| g MGYG-HGUT-03943 | g Cladosporium                 | -0.008777144 | 0.812729555 | 0.934142805 |
| g MGYG-HGUT-03943 | g Debaryomyces                 | -0.104614595 | 0.004634498 | 0.133326839 |
| g MGYG-HGUT-03943 | g Aspergillus                  | 0.013401745  | 0.717546869 | 0.903293001 |
| g MGYG-HGUT-03943 | g Kazachstania                 | -0.078545805 | 0.033729496 | 0.328358347 |
| g MGYG-HGUT-03943 | g Malassezia                   | 0.012933355  | 0.727017657 | 0.907012052 |
| g MGYG-HGUT-03943 | g unclassified Fungi           | 0.050556163  | 0.172120583 | 0.566309615 |
| g MGYG-HGUT-03943 | g Mycosphaerella               | -0.007376568 | 0.842183145 | 0.945972695 |
| g MGYG-HGUT-03943 | g Simplicillium                | 0.020809124  | 0.574310536 | 0.834686731 |
| g MGYG-HGUT-03943 | g unclassified Cordycipitaceae | 0.053817173  | 0.14605197  | 0.540957635 |
| g MGYG-HGUT-03943 | g unidentified                 | 0.072810988  | 0.049087021 | 0.381649452 |
| g CAG-269         | g Verticillium                 | 0.004459127  | 0.904201345 | 0.967468011 |
| g CAG-269         | g unclassified Tremellomycetes | -0.082656202 | 0.025431969 | 0.296062815 |
| g CAG-269         | g Candida                      | -0.068742519 | 0.063224496 | 0.421138313 |
| g CAG-269         | g Cladosporium                 | -0.038700341 | 0.296049585 | 0.664712449 |
| g CAG-269         | g Debaryomyces                 | -0.034744561 | 0.348211143 | 0.700111089 |
| g CAG-269         | g Aspergillus                  | -0.056629626 | 0.126090179 | 0.51233112  |
| g CAG-269         | g Kazachstania                 | -0.039885166 | 0.281498675 | 0.657094722 |
| g CAG-269         | g Malassezia                   | -0.018402621 | 0.619370665 | 0.856084166 |
| g CAG-269         | g unclassified Fungi           | 0.014360751  | 0.698291848 | 0.895302916 |
| g CAG-269         | g Mycosphaerella               | -0.002526134 | 0.945640482 | 0.980291673 |
| g CAG-269         | g Simplicillium                | 0.03626705   | 0.327482774 | 0.682976491 |
| g CAG-269         | g unclassified Cordycipitaceae | 0.046124887  | 0.212908364 | 0.600680647 |
| g CAG-269         | g unidentified                 | 0.038154184  | 0.302923232 | 0.668794834 |
| g MGYG-HGUT-01861 | g Verticillium                 | 0.057464776  | 0.120590493 | 0.505147562 |
| g MGYG-HGUT-01861 | g unclassified Tremellomycetes | -0.036210225 | 0.328241782 | 0.684020192 |
| g MGYG-HGUT-01861 | g Candida                      | -0.013469566 | 0.716179067 | 0.903168431 |
| g MGYG-HGUT-01861 | g Cladosporium                 | -0.02599462  | 0.482845895 | 0.780449413 |
| g MGYG-HGUT-01861 | g Debaryomyces                 | -0.006387706 | 0.86311467  | 0.953203381 |
| g MGYG-HGUT-01861 | g Aspergillus                  | -0.03272331  | 0.376986141 | 0.720869551 |
| g MGYG-HGUT-01861 | g Kazachstania                 | 0.01145893   | 0.757096987 | 0.912291885 |

|                   |                                |              |             |             |
|-------------------|--------------------------------|--------------|-------------|-------------|
| g MGYG-HGUT-01861 | g Malassezia                   | 0.029570425  | 0.424695084 | 0.748272292 |
| g MGYG-HGUT-01861 | g unclassified Fungi           | -0.022706041 | 0.539921356 | 0.815420595 |
| g MGYG-HGUT-01861 | g Mycosphaerella               | 0.050225851  | 0.174943569 | 0.570082525 |
| g MGYG-HGUT-01861 | g Simplicillium                | 0.047995444  | 0.194913575 | 0.584464564 |
| g MGYG-HGUT-01861 | g unclassified Cordycipitaceae | 0.054343131  | 0.142146005 | 0.537187832 |
| g MGYG-HGUT-01861 | g unidentified                 | -0.022839171 | 0.537547023 | 0.813920136 |
| g CAG-273         | g Verticillium                 | 0.067872894  | 0.066645809 | 0.430259125 |
| g CAG-273         | g unclassified Tremellomycetes | -0.084149722 | 0.022887926 | 0.283684623 |
| g CAG-273         | g Candida                      | -0.021979032 | 0.552979013 | 0.820367644 |
| g CAG-273         | g Cladosporium                 | 0.016756054  | 0.651060016 | 0.870940511 |
| g CAG-273         | g Debaryomyces                 | -0.01073977  | 0.771905961 | 0.917900008 |
| g CAG-273         | g Aspergillus                  | 0.010457405  | 0.777743501 | 0.920899824 |
| g CAG-273         | g Kazachstania                 | 0.048237465  | 0.192669206 | 0.581782946 |
| g CAG-273         | g Malassezia                   | 0.053810436  | 0.146102525 | 0.540957635 |
| g CAG-273         | g unclassified Fungi           | -0.027707922 | 0.454459556 | 0.765814499 |
| g CAG-273         | g Mycosphaerella               | 0.045627226  | 0.217891393 | 0.605493413 |
| g CAG-273         | g Simplicillium                | 0.058973474  | 0.111132249 | 0.494471808 |
| g CAG-273         | g unclassified Cordycipitaceae | 0.081294332  | 0.027961005 | 0.307552108 |
| g CAG-273         | g unidentified                 | -0.043936692 | 0.235441909 | 0.619373537 |
| g CAG-245         | g Verticillium                 | 0.063969792  | 0.083923224 | 0.457299461 |
| g CAG-245         | g unclassified Tremellomycetes | -0.081688503 | 0.027207674 | 0.305021761 |
| g CAG-245         | g Candida                      | 0.003718972  | 0.920044116 | 0.972326659 |
| g CAG-245         | g Cladosporium                 | -0.008806613 | 0.812112514 | 0.934142805 |
| g CAG-245         | g Debaryomyces                 | -0.087108178 | 0.018493153 | 0.263384313 |
| g CAG-245         | g Aspergillus                  | -0.001494597 | 0.967821818 | 0.988549475 |
| g CAG-245         | g Kazachstania                 | -0.021744142 | 0.557230614 | 0.82366348  |
| g CAG-245         | g Malassezia                   | 0.017928371  | 0.628429212 | 0.859622276 |
| g CAG-245         | g unclassified Fungi           | 0.047632789  | 0.198312369 | 0.58591995  |
| g CAG-245         | g Mycosphaerella               | 0.035507436  | 0.337722811 | 0.692361927 |
| g CAG-245         | g Simplicillium                | 0.012444192  | 0.736953066 | 0.90779094  |
| g CAG-245         | g unclassified Cordycipitaceae | 0.024140539  | 0.514616641 | 0.802131874 |
| g CAG-245         | g unidentified                 | 0.079031908  | 0.032640922 | 0.325586982 |
| g CAG-793         | g Verticillium                 | 0.020129943  | 0.58687014  | 0.840928886 |
| g CAG-793         | g unclassified Tremellomycetes | -0.102958393 | 0.005330835 | 0.14083337  |
| g CAG-793         | g Candida                      | -0.04642933  | 0.209900783 | 0.598807697 |
| g CAG-793         | g Cladosporium                 | -0.051602135 | 0.163405637 | 0.561232861 |
| g CAG-793         | g Debaryomyces                 | -0.078705675 | 0.033368115 | 0.327248742 |
| g CAG-793         | g Aspergillus                  | 0.026932285  | 0.467192723 | 0.772354984 |
| g CAG-793         | g Kazachstania                 | 0.009628162  | 0.79495845  | 0.928299528 |
| g CAG-793         | g Malassezia                   | 0.010363036  | 0.77969729  | 0.921371303 |
| g CAG-793         | g unclassified Fungi           | 0.011159034  | 0.763261989 | 0.915034792 |
| g CAG-793         | g Mycosphaerella               | -0.047065412 | 0.203716254 | 0.593377363 |
| g CAG-793         | g Simplicillium                | 0.011828859  | 0.749513555 | 0.910387945 |
| g CAG-793         | g unclassified Cordycipitaceae | 0.032285745  | 0.383402919 | 0.724263642 |
| g CAG-793         | g unidentified                 | 0.025465203  | 0.491807883 | 0.785854011 |
| g MGYG-HGUT-01195 | g Verticillium                 | 0.091738594  | 0.013089426 | 0.221974858 |
| g MGYG-HGUT-01195 | g unclassified Tremellomycetes | -0.073611957 | 0.046641506 | 0.375045907 |
| g MGYG-HGUT-01195 | g Candida                      | -0.041070099 | 0.267438647 | 0.644978472 |
| g MGYG-HGUT-01195 | g Cladosporium                 | 0.035885712  | 0.33259803  | 0.688353677 |
| g MGYG-HGUT-01195 | g Debaryomyces                 | -0.062822294 | 0.089640499 | 0.467278702 |
| g MGYG-HGUT-01195 | g Aspergillus                  | -0.012579199 | 0.734206462 | 0.907315107 |
| g MGYG-HGUT-01195 | g Kazachstania                 | 0.009080225  | 0.806389016 | 0.932387299 |
| g MGYG-HGUT-01195 | g Malassezia                   | 0.055578758  | 0.133285099 | 0.521799082 |
| g MGYG-HGUT-01195 | g unclassified Fungi           | -0.012191932 | 0.742094077 | 0.909480234 |
| g MGYG-HGUT-01195 | g Mycosphaerella               | 0.104256704  | 0.0047776   | 0.136271068 |
| g MGYG-HGUT-01195 | g Simplicillium                | 0.033871084  | 0.360470939 | 0.711747526 |
| g MGYG-HGUT-01195 | g unclassified Cordycipitaceae | 0.087163417  | 0.018418644 | 0.262676672 |
| g MGYG-HGUT-01195 | g unidentified                 | 0.021864339  | 0.555053015 | 0.82159337  |
| g UBA7001         | g Verticillium                 | -0.001366066 | 0.970587738 | 0.989156993 |
| g UBA7001         | g unclassified Tremellomycetes | -0.073238983 | 0.047767233 | 0.377500268 |
| g UBA7001         | g Candida                      | -0.065661772 | 0.076034223 | 0.446374478 |
| g UBA7001         | g Cladosporium                 | -0.006817945 | 0.853994984 | 0.949960572 |
| g UBA7001         | g Debaryomyces                 | -0.120830755 | 0.00106295  | 0.062177529 |
| g UBA7001         | g Aspergillus                  | 0.002134708  | 0.954053365 | 0.983132993 |
| g UBA7001         | g Kazachstania                 | 0.009457734  | 0.798509181 | 0.929569806 |
| g UBA7001         | g Malassezia                   | 0.007085664  | 0.848329941 | 0.948644979 |
| g UBA7001         | g unclassified Fungi           | 0.013911072  | 0.707297325 | 0.900459612 |
| g UBA7001         | g Mycosphaerella               | 0.035959876  | 0.331599195 | 0.687496606 |
| g UBA7001         | g Simplicillium                | 0.003542876  | 0.92381829  | 0.974172444 |
| g UBA7001         | g unclassified Cordycipitaceae | 0.053314887  | 0.14985816  | 0.546638764 |
| g UBA7001         | g unidentified                 | 0.017202805  | 0.642396405 | 0.86585642  |
| g MGYG-HGUT-02797 | g Verticillium                 | 0.0174684    | 0.637268692 | 0.863812758 |
| g MGYG-HGUT-02797 | g unclassified Tremellomycetes | -0.029583225 | 0.424494548 | 0.748043515 |
| g MGYG-HGUT-02797 | g Candida                      | -0.009016115 | 0.807729168 | 0.933223066 |
| g MGYG-HGUT-02797 | g Cladosporium                 | -0.005325567 | 0.885704188 | 0.96210924  |
| g MGYG-HGUT-02797 | g Debaryomyces                 | -0.064798173 | 0.079981908 | 0.45101344  |
| g MGYG-HGUT-02797 | g Aspergillus                  | -0.039942084 | 0.280812066 | 0.657094722 |
| g MGYG-HGUT-02797 | g Kazachstania                 | 0.010944265  | 0.767686275 | 0.916616044 |

|                   |                                |              |             |             |
|-------------------|--------------------------------|--------------|-------------|-------------|
| g MGYG-HGUT-02797 | g Malassezia                   | -0.009808469 | 0.791206494 | 0.926624392 |
| g MGYG-HGUT-02797 | g unclassified Fungi           | 0.003957579  | 0.914933045 | 0.97135264  |
| g MGYG-HGUT-02797 | g Mycosphaerella               | -0.035240749 | 0.341366082 | 0.694699556 |
| g MGYG-HGUT-02797 | g Simplicillium                | -0.064483629 | 0.08146041  | 0.452919383 |
| g MGYG-HGUT-02797 | g unclassified Cordycipitaceae | 0.049194617  | 0.183978737 | 0.575925162 |
| g MGYG-HGUT-02797 | g unidentified                 | -0.053696791 | 0.146957395 | 0.54128199  |
| g CAG-492         | g Verticillium                 | 0.027434885  | 0.45891943  | 0.768035017 |
| g CAG-492         | g unclassified Tremellomycetes | -0.06355465  | 0.085956631 | 0.46172237  |
| g CAG-492         | g Candida                      | -0.077496049 | 0.036186376 | 0.337675685 |
| g CAG-492         | g Cladosporium                 | -0.024614882 | 0.506386598 | 0.796460015 |
| g CAG-492         | g Debaryomyces                 | -0.099653576 | 0.007008529 | 0.15915076  |
| g CAG-492         | g Aspergillus                  | -0.003489886 | 0.924954329 | 0.974172444 |
| g CAG-492         | g Kazachstania                 | -0.014715513 | 0.69121693  | 0.892872327 |
| g CAG-492         | g Malassezia                   | -0.004060107 | 0.912737904 | 0.970712814 |
| g CAG-492         | g unclassified Fungi           | 0.017598551  | 0.634762213 | 0.862376908 |
| g CAG-492         | g Mycosphaerella               | 0.004729843  | 0.898415927 | 0.965573567 |
| g CAG-492         | g Simplicillium                | 0.025749559  | 0.486983254 | 0.783154405 |
| g CAG-492         | g unclassified Cordycipitaceae | 0.05260214   | 0.155388135 | 0.552672864 |
| g CAG-492         | g unidentified                 | 0.027832204  | 0.452437584 | 0.765051856 |
| g CAG-354         | g Verticillium                 | -0.004823833 | 0.896408512 | 0.965082397 |
| g CAG-354         | g unclassified Tremellomycetes | 0.001614099  | 0.965250546 | 0.987554992 |
| g CAG-354         | g Candida                      | -0.02402794  | 0.516580415 | 0.802865612 |
| g CAG-354         | g Cladosporium                 | 0.007845765  | 0.832289376 | 0.941418308 |
| g CAG-354         | g Debaryomyces                 | -0.020172721 | 0.586075357 | 0.840586802 |
| g CAG-354         | g Aspergillus                  | -0.034285944 | 0.354614779 | 0.70583652  |
| g CAG-354         | g Kazachstania                 | -0.018633851 | 0.614974712 | 0.853151823 |
| g CAG-354         | g Malassezia                   | -0.019725047 | 0.594417505 | 0.844389068 |
| g CAG-354         | g unclassified Fungi           | -0.007893784 | 0.831278286 | 0.94102335  |
| g CAG-354         | g Mycosphaerella               | -0.022615276 | 0.541543118 | 0.815861229 |
| g CAG-354         | g Simplicillium                | 0.047347985  | 0.201011713 | 0.590022167 |
| g CAG-354         | g unclassified Cordycipitaceae | 0.053051669  | 0.151882677 | 0.548993338 |
| g CAG-354         | g unidentified                 | -0.002397307 | 0.948408726 | 0.981713894 |
| g CAG-452         | g Verticillium                 | 0.081327865  | 0.027896227 | 0.307552108 |
| g CAG-452         | g unclassified Tremellomycetes | -0.022460345 | 0.54431697  | 0.816215242 |
| g CAG-452         | g Candida                      | -0.034264977 | 0.354909301 | 0.705850547 |
| g CAG-452         | g Cladosporium                 | 0.025769377  | 0.486647962 | 0.783106559 |
| g CAG-452         | g Debaryomyces                 | -0.013010885 | 0.725447075 | 0.906873118 |
| g CAG-452         | g Aspergillus                  | -0.00073575  | 0.984156303 | 0.993545315 |
| g CAG-452         | g Kazachstania                 | -0.031350275 | 0.397343452 | 0.732740506 |
| g CAG-452         | g Malassezia                   | 0.053699485  | 0.146937085 | 0.54128199  |
| g CAG-452         | g unclassified Fungi           | 0.008826998  | 0.811685755 | 0.934113162 |
| g CAG-452         | g Mycosphaerella               | 0.038586175  | 0.29747774  | 0.666037764 |
| g CAG-452         | g Simplicillium                | 0.060252108  | 0.103582541 | 0.483414571 |
| g CAG-452         | g unclassified Cordycipitaceae | 0.100930548  | 0.006311038 | 0.150048656 |
| g CAG-452         | g unidentified                 | -0.037783972 | 0.307642268 | 0.670833121 |
| g MGYG-HGUT-00948 | g Verticillium                 | 0.013631651  | 0.712913886 | 0.902150278 |
| g MGYG-HGUT-00948 | g unclassified Tremellomycetes | -0.096520428 | 0.009021006 | 0.182176119 |
| g MGYG-HGUT-00948 | g Candida                      | -0.067203508 | 0.069381749 | 0.43858881  |
| g MGYG-HGUT-00948 | g Cladosporium                 | -0.02121574  | 0.566852563 | 0.830003297 |
| g MGYG-HGUT-00948 | g Debaryomyces                 | -0.114410658 | 0.001946951 | 0.084840998 |
| g MGYG-HGUT-00948 | g Aspergillus                  | 0.049978859  | 0.177076897 | 0.572778705 |
| g MGYG-HGUT-00948 | g Kazachstania                 | -0.082894227 | 0.025010855 | 0.293745688 |
| g MGYG-HGUT-00948 | g Malassezia                   | -0.017373509 | 0.639098724 | 0.86388896  |
| g MGYG-HGUT-00948 | g unclassified Fungi           | 0.037039159  | 0.317282647 | 0.675963115 |
| g MGYG-HGUT-00948 | g Mycosphaerella               | -0.031759178 | 0.39121276  | 0.729890405 |
| g MGYG-HGUT-00948 | g Simplicillium                | -0.004437078 | 0.904672773 | 0.967483304 |
| g MGYG-HGUT-00948 | g unclassified Cordycipitaceae | 0.032331313  | 0.382731577 | 0.723742949 |
| g MGYG-HGUT-00948 | g unidentified                 | 0.06483722   | 0.079799896 | 0.45101344  |
| g MGYG-HGUT-03669 | g Verticillium                 | 0.057791853  | 0.118488374 | 0.502487018 |
| g MGYG-HGUT-03669 | g unclassified Tremellomycetes | -0.087030639 | 0.018598185 | 0.264524179 |
| g MGYG-HGUT-03669 | g Candida                      | -0.072533649 | 0.049958439 | 0.385192726 |
| g MGYG-HGUT-03669 | g Cladosporium                 | -0.000865122 | 0.981370861 | 0.993008299 |
| g MGYG-HGUT-03669 | g Debaryomyces                 | -0.032209788 | 0.384523557 | 0.725207645 |
| g MGYG-HGUT-03669 | g Aspergillus                  | -0.001947627 | 0.958076147 | 0.984847119 |
| g MGYG-HGUT-03669 | g Kazachstania                 | -0.020044116 | 0.588466286 | 0.841860194 |
| g MGYG-HGUT-03669 | g Malassezia                   | -0.01187741  | 0.74852003  | 0.910244784 |
| g MGYG-HGUT-03669 | g unclassified Fungi           | 0.012725056  | 0.731242934 | 0.907315107 |
| g MGYG-HGUT-03669 | g Mycosphaerella               | -0.000123535 | 0.99733961  | 0.998643711 |
| g MGYG-HGUT-03669 | g Simplicillium                | 0.030112588  | 0.416249321 | 0.743976838 |
| g MGYG-HGUT-03669 | g unclassified Cordycipitaceae | 0.052610523  | 0.155322212 | 0.552672864 |
| g MGYG-HGUT-03669 | g unidentified                 | -0.022418521 | 0.545066992 | 0.816215242 |
| g MGYG-HGUT-02769 | g Verticillium                 | 0.019906875  | 0.591022719 | 0.84265729  |
| g MGYG-HGUT-02769 | g unclassified Tremellomycetes | -0.061467303 | 0.096790072 | 0.477459115 |
| g MGYG-HGUT-02769 | g Candida                      | 0.018309098  | 0.621152528 | 0.856123107 |
| g MGYG-HGUT-02769 | g Cladosporium                 | -0.042664334 | 0.249293692 | 0.631653529 |
| g MGYG-HGUT-02769 | g Debaryomyces                 | -0.081422275 | 0.02771454  | 0.306773283 |
| g MGYG-HGUT-02769 | g Aspergillus                  | -0.02323202  | 0.530571324 | 0.811128912 |
| g MGYG-HGUT-02769 | g Kazachstania                 | -0.035274101 | 0.340909089 | 0.694699556 |

|                   |                                |              |             |             |
|-------------------|--------------------------------|--------------|-------------|-------------|
| g MGYG-HGUT-02769 | g Malassezia                   | 0.038619599  | 0.297059145 | 0.665940424 |
| g MGYG-HGUT-02769 | g unclassified Fungi           | 0.010405036  | 0.778827573 | 0.921314364 |
| g MGYG-HGUT-02769 | g Mycosphaerella               | -0.074958381 | 0.042761372 | 0.360271369 |
| g MGYG-HGUT-02769 | g Simplicillium                | 0.047053368  | 0.203832121 | 0.593384182 |
| g MGYG-HGUT-02769 | g unclassified Cordycipitaceae | 0.014183024  | 0.701846115 | 0.897212331 |
| g MGYG-HGUT-02769 | g unidentified                 | 0.086304317  | 0.019607595 | 0.270166111 |
| g CAG-465         | g Verticillium                 | 0.003606121  | 0.922462584 | 0.973795648 |
| g CAG-465         | g unclassified Tremellomycetes | -0.010930462 | 0.76797088  | 0.916616044 |
| g CAG-465         | g Candida                      | -0.075911315 | 0.040182878 | 0.350685903 |
| g CAG-465         | g Cladosporium                 | 0.038334551  | 0.300641615 | 0.667386268 |
| g CAG-465         | g Debaryomyces                 | -0.06024176  | 0.103641967 | 0.483414571 |
| g CAG-465         | g Aspergillus                  | 0.023285884  | 0.529618472 | 0.810356084 |
| g CAG-465         | g Kazachstania                 | 0.023856977  | 0.519569486 | 0.804180896 |
| g CAG-465         | g Malassezia                   | -0.008311778 | 0.822488911 | 0.938379371 |
| g CAG-465         | g unclassified Fungi           | 0.025740354  | 0.48713903  | 0.783154405 |
| g CAG-465         | g Mycosphaerella               | -0.007213886 | 0.845619458 | 0.947820248 |
| g CAG-465         | g Simplicillium                | 0.002039559  | 0.95609921  | 0.983900408 |
| g CAG-465         | g unclassified Cordycipitaceae | 0.05174605   | 0.162233001 | 0.560004909 |
| g CAG-465         | g unidentified                 | -0.045687894 | 0.217279491 | 0.605066203 |
| g MGYG-HGUT-02571 | g Verticillium                 | 0.03581091   | 0.33360744  | 0.689229584 |
| g MGYG-HGUT-02571 | g unclassified Tremellomycetes | -0.05516724  | 0.136187513 | 0.52711641  |
| g MGYG-HGUT-02571 | g Candida                      | -0.047131709 | 0.20307936  | 0.593060693 |
| g MGYG-HGUT-02571 | g Cladosporium                 | 0.052606575  | 0.155353257 | 0.552672864 |
| g MGYG-HGUT-02571 | g Debaryomyces                 | -0.071100403 | 0.054670601 | 0.399257624 |
| g MGYG-HGUT-02571 | g Aspergillus                  | -0.030291259 | 0.413487834 | 0.742811081 |
| g MGYG-HGUT-02571 | g Kazachstania                 | -0.027997642 | 0.449753943 | 0.763196957 |
| g MGYG-HGUT-02571 | g Malassezia                   | -0.028378203 | 0.443614981 | 0.760832047 |
| g MGYG-HGUT-02571 | g unclassified Fungi           | 0.007699687  | 0.835366908 | 0.942615976 |
| g MGYG-HGUT-02571 | g Mycosphaerella               | 0.006082428  | 0.869596724 | 0.955405149 |
| g MGYG-HGUT-02571 | g Simplicillium                | -0.071915432 | 0.051947577 | 0.390973866 |
| g MGYG-HGUT-02571 | g unclassified Cordycipitaceae | 0.065952034  | 0.074743547 | 0.444519981 |
| g MGYG-HGUT-02571 | g unidentified                 | 0.018351963  | 0.620335559 | 0.856123107 |
| g QALS01          | g Verticillium                 | 0.053141623  | 0.151188474 | 0.548001221 |
| g QALS01          | g unclassified Tremellomycetes | -0.084794961 | 0.021858974 | 0.281743803 |
| g QALS01          | g Candida                      | -0.039118223 | 0.290861243 | 0.660476148 |
| g QALS01          | g Cladosporium                 | 0.004643198  | 0.900267033 | 0.96604016  |
| g QALS01          | g Debaryomyces                 | -0.106561284 | 0.003921794 | 0.122598495 |
| g QALS01          | g Aspergillus                  | 0.092203386  | 0.012632956 | 0.219768851 |
| g QALS01          | g Kazachstania                 | -0.107785869 | 0.003525953 | 0.117702318 |
| g QALS01          | g Malassezia                   | 0.057793695  | 0.118476616 | 0.502487018 |
| g QALS01          | g unclassified Fungi           | 0.060775188  | 0.100613762 | 0.478858752 |
| g QALS01          | g Mycosphaerella               | -0.003104971 | 0.933210928 | 0.976431995 |
| g QALS01          | g Simplicillium                | -0.006249698 | 0.866043908 | 0.954967619 |
| g QALS01          | g unclassified Cordycipitaceae | 0.06009236   | 0.104502923 | 0.484596813 |
| g QALS01          | g unidentified                 | 0.029368802  | 0.42786126  | 0.750850391 |
| g MGYG-HGUT-03248 | g Verticillium                 | 0.014029387  | 0.704923877 | 0.898763556 |
| g MGYG-HGUT-03248 | g unclassified Tremellomycetes | -0.043142567 | 0.24402208  | 0.627824375 |
| g MGYG-HGUT-03248 | g Candida                      | -0.003367904 | 0.927570077 | 0.974599406 |
| g MGYG-HGUT-03248 | g Cladosporium                 | -0.01533265  | 0.678973755 | 0.885603387 |
| g MGYG-HGUT-03248 | g Debaryomyces                 | 0.001874582  | 0.959647119 | 0.984964676 |
| g MGYG-HGUT-03248 | g Aspergillus                  | 0.014424592  | 0.697016744 | 0.895302916 |
| g MGYG-HGUT-03248 | g Kazachstania                 | -0.074897397 | 0.042931034 | 0.361413052 |
| g MGYG-HGUT-03248 | g Malassezia                   | 0.018078051  | 0.625564081 | 0.85769877  |
| g MGYG-HGUT-03248 | g unclassified Fungi           | 0.006117238  | 0.868857125 | 0.955345605 |
| g MGYG-HGUT-03248 | g Mycosphaerella               | 0.071215334  | 0.054279564 | 0.398805432 |
| g MGYG-HGUT-03248 | g Simplicillium                | 0.020456035  | 0.580824108 | 0.837824524 |
| g MGYG-HGUT-03248 | g unclassified Cordycipitaceae | 0.0200733    | 0.587923324 | 0.841640234 |
| g MGYG-HGUT-03248 | g unidentified                 | 0.06133879   | 0.097491154 | 0.477597322 |
| g UBA10281        | g Verticillium                 | 0.043017102  | 0.245397471 | 0.628611967 |
| g UBA10281        | g unclassified Tremellomycetes | -0.072036683 | 0.051552318 | 0.388828673 |
| g UBA10281        | g Candida                      | -0.028090803 | 0.448246706 | 0.762502994 |
| g UBA10281        | g Cladosporium                 | 0.001224456  | 0.973635529 | 0.990490577 |
| g UBA10281        | g Debaryomyces                 | -0.144363139 | 8.97E-05    | 0.018295299 |
| g UBA10281        | g Aspergillus                  | 0.058513219  | 0.113953583 | 0.497306733 |
| g UBA10281        | g Kazachstania                 | -0.076406177 | 0.038896595 | 0.345770459 |
| g UBA10281        | g Malassezia                   | 0.048233526  | 0.192705588 | 0.581782946 |
| g UBA10281        | g unclassified Fungi           | 0.068033961  | 0.066000897 | 0.427692276 |
| g UBA10281        | g Mycosphaerella               | 0.025811449  | 0.485936568 | 0.782411275 |
| g UBA10281        | g Simplicillium                | 0.011249338  | 0.761404003 | 0.914666261 |
| g UBA10281        | g unclassified Cordycipitaceae | 0.037410072  | 0.312457339 | 0.672824117 |
| g UBA10281        | g unidentified                 | 0.051142744  | 0.167191458 | 0.562908051 |
| g UBA1259         | g Verticillium                 | 0.05774931   | 0.118760162 | 0.502487018 |
| g UBA1259         | g unclassified Tremellomycetes | -0.07897449  | 0.032767921 | 0.325586982 |
| g UBA1259         | g Candida                      | -0.060383845 | 0.102828389 | 0.482387553 |
| g UBA1259         | g Cladosporium                 | 0.008853341  | 0.811134318 | 0.934113162 |
| g UBA1259         | g Debaryomyces                 | -0.140843226 | 0.000133169 | 0.018928692 |
| g UBA1259         | g Aspergillus                  | 0.044149807  | 0.233176004 | 0.617638717 |
| g UBA1259         | g Kazachstania                 | -0.073090009 | 0.0482232   | 0.378604998 |



|                   |                                |              |             |              |
|-------------------|--------------------------------|--------------|-------------|--------------|
| g UBA1259         | g Malassezia                   | 0.060673538  | 0.101185326 | 0.479079697  |
| g UBA1259         | g unclassified Fungi           | 0.04287335   | 0.246979991 | 0.629733759  |
| g UBA1259         | g Mycosphaerella               | 0.018934565  | 0.60927838  | 0.851291399  |
| g UBA1259         | g Simplicillium                | 0.038210119  | 0.302214436 | 0.668551599  |
| g UBA1259         | g unclassified Cordycipitaceae | 0.075493719  | 0.041296161 | 0.355281277  |
| g UBA1259         | g unidentified                 | 0.025344059  | 0.493871069 | 0.787335309  |
| g MGYG-HGUT-00942 | g Verticillium                 | 0.065090139  | 0.078629076 | 0.450732872  |
| g MGYG-HGUT-00942 | g unclassified Tremellomycetes | -0.083831678 | 0.023410376 | 0.285827384  |
| g MGYG-HGUT-00942 | g Candida                      | 0.016628073  | 0.653550638 | 0.872421924  |
| g MGYG-HGUT-00942 | g Cladosporium                 | 0.020215541  | 0.585280269 | 0.840014196  |
| g MGYG-HGUT-00942 | g Debaryomyces                 | -0.07140284  | 0.053646603 | 0.397098662  |
| g MGYG-HGUT-00942 | g Aspergillus                  | 0.080671086  | 0.029188746 | 0.312580107  |
| g MGYG-HGUT-00942 | g Kazachstania                 | -0.012334399 | 0.739189197 | 0.908534631  |
| g MGYG-HGUT-00942 | g Malassezia                   | 0.075123243  | 0.042305546 | 0.358790655  |
| g MGYG-HGUT-00942 | g unclassified Fungi           | 0.050092869  | 0.176089768 | 0.571420949  |
| g MGYG-HGUT-00942 | g Mycosphaerella               | -0.033911955 | 0.359891324 | 0.7111275859 |
| g MGYG-HGUT-00942 | g Simplicillium                | 0.039815945  | 0.282335219 | 0.657175895  |
| g MGYG-HGUT-00942 | g unclassified Cordycipitaceae | 0.060442201  | 0.102495719 | 0.481834606  |
| g MGYG-HGUT-00942 | g unidentified                 | -0.000697512 | 0.984979609 | 0.994062877  |
| g CAG-314         | g Verticillium                 | 0.046513458  | 0.20907512  | 0.598168571  |
| g CAG-314         | g unclassified Tremellomycetes | -0.073650041 | 0.046527823 | 0.374986617  |
| g CAG-314         | g Candida                      | -0.056660481 | 0.125883581 | 0.512276291  |
| g CAG-314         | g Cladosporium                 | 0.022603778  | 0.541748731 | 0.816054814  |
| g CAG-314         | g Debaryomyces                 | -0.142993888 | 0.000104687 | 0.018409489  |
| g CAG-314         | g Aspergillus                  | 0.060222958  | 0.103750006 | 0.483414571  |
| g CAG-314         | g Kazachstania                 | -0.038322208 | 0.300797389 | 0.667386268  |
| g CAG-314         | g Malassezia                   | 0.08262979   | 0.025479073 | 0.296247379  |
| g CAG-314         | g unclassified Fungi           | -0.023037397 | 0.534021453 | 0.812044117  |
| g CAG-314         | g Mycosphaerella               | -0.021238908 | 0.566429013 | 0.829654737  |
| g CAG-314         | g Simplicillium                | 0.007609792  | 0.837262028 | 0.943910823  |
| g CAG-314         | g unclassified Cordycipitaceae | 0.065293583  | 0.077697448 | 0.449532201  |
| g CAG-314         | g unidentified                 | 0.011777376  | 0.750567519 | 0.910387945  |
| g UBA11517        | g Verticillium                 | 0.044553105  | 0.228930338 | 0.613524642  |
| g UBA11517        | g unclassified Tremellomycetes | -0.040237352 | 0.277268443 | 0.654270214  |
| g UBA11517        | g Candida                      | -0.013296854 | 0.719664045 | 0.904881764  |
| g UBA11517        | g Cladosporium                 | 0.019934973  | 0.59049891  | 0.842463713  |
| g UBA11517        | g Debaryomyces                 | -0.053437641 | 0.148921061 | 0.544911018  |
| g UBA11517        | g Aspergillus                  | -0.058905301 | 0.111546635 | 0.495063318  |
| g UBA11517        | g Kazachstania                 | 0.002223829  | 0.952137428 | 0.982634054  |
| g UBA11517        | g Malassezia                   | 0.049036451  | 0.185394478 | 0.576715352  |
| g UBA11517        | g unclassified Fungi           | -0.016303364 | 0.659887019 | 0.875821452  |
| g UBA11517        | g Mycosphaerella               | 0.007133172  | 0.847325466 | 0.948182609  |
| g UBA11517        | g Simplicillium                | 0.037650983  | 0.309349245 | 0.672075778  |
| g UBA11517        | g unclassified Cordycipitaceae | 0.065197296  | 0.078137248 | 0.450222934  |
| g UBA11517        | g unidentified                 | 0.013123732  | 0.723163138 | 0.905944398  |
| g UBA10677        | g Verticillium                 | 0.049075837  | 0.185041188 | 0.576342405  |
| g UBA10677        | g unclassified Tremellomycetes | -0.105306496 | 0.004368776 | 0.12806203   |
| g UBA10677        | g Candida                      | -0.011813335 | 0.749831302 | 0.910387945  |
| g UBA10677        | g Cladosporium                 | -0.023856434 | 0.519578982 | 0.804180896  |
| g UBA10677        | g Debaryomyces                 | -0.107676477 | 0.003559778 | 0.118457763  |
| g UBA10677        | g Aspergillus                  | 0.096302281  | 0.009178642 | 0.184188436  |
| g UBA10677        | g Kazachstania                 | -0.054476816 | 0.14116608  | 0.535803247  |
| g UBA10677        | g Malassezia                   | 0.063915901  | 0.084184974 | 0.45780011   |
| g UBA10677        | g unclassified Fungi           | 0.036109476  | 0.329590253 | 0.68534566   |
| g UBA10677        | g Mycosphaerella               | 0.042165582  | 0.254875556 | 0.635347198  |
| g UBA10677        | g Simplicillium                | 0.023682044  | 0.522637157 | 0.805852786  |
| g UBA10677        | g unclassified Cordycipitaceae | 0.054618948  | 0.140129938 | 0.533896229  |
| g UBA10677        | g unidentified                 | 0.016407169  | 0.657858695 | 0.874757951  |
| g MGYG-HGUT-03258 | g Verticillium                 | 0.059643139  | 0.107125858 | 0.488444035  |
| g MGYG-HGUT-03258 | g unclassified Tremellomycetes | -0.040111932 | 0.27876993  | 0.655980297  |
| g MGYG-HGUT-03258 | g Candida                      | 0.012475714  | 0.736311474 | 0.907602097  |
| g MGYG-HGUT-03258 | g Cladosporium                 | 0.009292411  | 0.801957544 | 0.930555602  |
| g MGYG-HGUT-03258 | g Debaryomyces                 | -0.068621761 | 0.063690745 | 0.421234664  |
| g MGYG-HGUT-03258 | g Aspergillus                  | 0.061863272  | 0.094655197 | 0.473835105  |
| g MGYG-HGUT-03258 | g Kazachstania                 | -0.041672525 | 0.260478359 | 0.638638484  |
| g MGYG-HGUT-03258 | g Malassezia                   | 0.08438703   | 0.022504714 | 0.283321191  |
| g MGYG-HGUT-03258 | g unclassified Fungi           | 0.063850212  | 0.084504915 | 0.458565103  |
| g MGYG-HGUT-03258 | g Mycosphaerella               | 0.034900794  | 0.34604654  | 0.697400798  |
| g MGYG-HGUT-03258 | g Simplicillium                | 0.011233555  | 0.761728639 | 0.914666261  |
| g MGYG-HGUT-03258 | g unclassified Cordycipitaceae | 0.06813108   | 0.065614522 | 0.426232576  |
| g MGYG-HGUT-03258 | g unidentified                 | 0.029758322  | 0.421756786 | 0.746638969  |
| g MGYG-HGUT-03212 | g Verticillium                 | 0.032185268  | 0.384885744 | 0.725207645  |
| g MGYG-HGUT-03212 | g unclassified Tremellomycetes | -0.010877539 | 0.769062407 | 0.917136742  |
| g MGYG-HGUT-03212 | g Candida                      | 0.008707365  | 0.814191105 | 0.934766567  |
| g MGYG-HGUT-03212 | g Cladosporium                 | 0.044931834  | 0.224993598 | 0.612060698  |
| g MGYG-HGUT-03212 | g Debaryomyces                 | -0.074290171 | 0.04465157  | 0.367648298  |
| g MGYG-HGUT-03212 | g Aspergillus                  | 0.035003018  | 0.344634856 | 0.696679266  |
| g MGYG-HGUT-03212 | g Kazachstania                 | -0.014033481 | 0.704841798 | 0.898763556  |

|                   |                                |              |             |             |
|-------------------|--------------------------------|--------------|-------------|-------------|
| g MGYG-HGUT-03212 | g Malassezia                   | 0.010984415  | 0.766858616 | 0.916616044 |
| g MGYG-HGUT-03212 | g unclassified Fungi           | 0.072751468  | 0.049272955 | 0.38223952  |
| g MGYG-HGUT-03212 | g Mycosphaerella               | -0.041641165 | 0.26083757  | 0.638638484 |
| g MGYG-HGUT-03212 | g Simplicillium                | -0.001730661 | 0.962742875 | 0.986228955 |
| g MGYG-HGUT-03212 | g unclassified Cordycipitaceae | 0.073036615  | 0.048387509 | 0.378609254 |
| g MGYG-HGUT-03212 | g unidentified                 | -0.029151631 | 0.431286885 | 0.753212133 |
| g CAG-475         | g Verticillium                 | 0.046098275  | 0.213172732 | 0.600680647 |
| g CAG-475         | g unclassified Tremellomycetes | -0.12595811  | 0.000641798 | 0.046998384 |
| g CAG-475         | g Candida                      | -0.066355879 | 0.072977586 | 0.443311605 |
| g CAG-475         | g Cladosporium                 | 0.001272638  | 0.972598495 | 0.990221507 |
| g CAG-475         | g Debaryomyces                 | -0.127484498 | 0.000550277 | 0.045221636 |
| g CAG-475         | g Aspergillus                  | 0.028929694  | 0.434804038 | 0.754773019 |
| g CAG-475         | g Kazachstania                 | -0.066460303 | 0.072526536 | 0.442493968 |
| g CAG-475         | g Malassezia                   | 0.060279695  | 0.103424256 | 0.483295494 |
| g CAG-475         | g unclassified Fungi           | 0.070550897  | 0.056572754 | 0.404484002 |
| g CAG-475         | g Mycosphaerella               | 0.026838467  | 0.468746144 | 0.77312422  |
| g CAG-475         | g Simplicillium                | 0.045416771  | 0.220023642 | 0.607083027 |
| g CAG-475         | g unclassified Cordycipitaceae | 0.041339178  | 0.264314158 | 0.642342032 |
| g CAG-475         | g unidentified                 | 0.043546     | 0.239636161 | 0.623263007 |
| g MGYG-HGUT-04615 | g Verticillium                 | 0.040304404  | 0.276467979 | 0.654054136 |
| g MGYG-HGUT-04615 | g unclassified Tremellomycetes | -0.03218572  | 0.384879068 | 0.725207645 |
| g MGYG-HGUT-04615 | g Candida                      | 0.034581886  | 0.350474117 | 0.702774112 |
| g MGYG-HGUT-04615 | g Cladosporium                 | -0.026453509 | 0.475149996 | 0.776548009 |
| g MGYG-HGUT-04615 | g Debaryomyces                 | 0.022909841  | 0.536288771 | 0.813415158 |
| g MGYG-HGUT-04615 | g Aspergillus                  | 0.012898938  | 0.72771522  | 0.907012052 |
| g MGYG-HGUT-04615 | g Kazachstania                 | 0.022533811  | 0.54300078  | 0.816215242 |
| g MGYG-HGUT-04615 | g Malassezia                   | 0.005501207  | 0.881961764 | 0.960513102 |
| g MGYG-HGUT-04615 | g unclassified Fungi           | -0.025452631 | 0.49202178  | 0.785854011 |
| g MGYG-HGUT-04615 | g Mycosphaerella               | 0.038318147  | 0.30084865  | 0.667386268 |
| g MGYG-HGUT-04615 | g Simplicillium                | -0.002517292 | 0.945830465 | 0.980291673 |
| g MGYG-HGUT-04615 | g unclassified Cordycipitaceae | 0.00953973   | 0.796800347 | 0.929219889 |
| g MGYG-HGUT-04615 | g unidentified                 | -0.024545719 | 0.507582273 | 0.797629286 |
| g Clostridium     | g Verticillium                 | -0.083350779 | 0.024219959 | 0.289927152 |
| g Clostridium     | g unclassified Tremellomycetes | -0.042248382 | 0.253942922 | 0.634527508 |
| g Clostridium     | g Candida                      | -0.078119944 | 0.034708478 | 0.332084192 |
| g Clostridium     | g Cladosporium                 | 0.023779912  | 0.520919768 | 0.804795608 |
| g Clostridium     | g Debaryomyces                 | 0.040033099  | 0.279716502 | 0.656601603 |
| g Clostridium     | g Aspergillus                  | 0.067244501  | 0.069211596 | 0.438023791 |
| g Clostridium     | g Kazachstania                 | 0.009110844  | 0.805749155 | 0.932054827 |
| g Clostridium     | g Malassezia                   | -0.074590284 | 0.043794098 | 0.364933723 |
| g Clostridium     | g unclassified Fungi           | -0.011603869 | 0.754122955 | 0.91153556  |
| g Clostridium     | g Mycosphaerella               | -0.039373656 | 0.287720059 | 0.659362601 |
| g Clostridium     | g Simplicillium                | 0.021580162  | 0.560208107 | 0.826334288 |
| g Clostridium     | g unclassified Cordycipitaceae | -0.02373298  | 0.521742964 | 0.805467412 |
| g Clostridium     | g unidentified                 | -0.003713947 | 0.92015179  | 0.972343343 |
| g Clostridium P   | g Verticillium                 | -0.041086782 | 0.26724419  | 0.644908703 |
| g Clostridium P   | g unclassified Tremellomycetes | -0.009487081 | 0.797897462 | 0.929475004 |
| g Clostridium P   | g Candida                      | -0.048813455 | 0.187404142 | 0.577661122 |
| g Clostridium P   | g Cladosporium                 | 0.017680783  | 0.63318071  | 0.861635763 |
| g Clostridium P   | g Debaryomyces                 | 0.001681116  | 0.963808729 | 0.986938646 |
| g Clostridium P   | g Aspergillus                  | 0.061710447  | 0.09547465  | 0.475474903 |
| g Clostridium P   | g Kazachstania                 | 0.04578238   | 0.216328954 | 0.603690134 |
| g Clostridium P   | g Malassezia                   | -0.026997859 | 0.466108647 | 0.771766814 |
| g Clostridium P   | g unclassified Fungi           | -0.049408898 | 0.182073487 | 0.575010893 |
| g Clostridium P   | g Mycosphaerella               | -0.037023903 | 0.317482153 | 0.676111118 |
| g Clostridium P   | g Simplicillium                | 0.041764995  | 0.259421156 | 0.638268931 |
| g Clostridium P   | g unclassified Cordycipitaceae | -0.00369716  | 0.920511492 | 0.972626321 |
| g Clostridium P   | g unidentified                 | -0.001194052 | 0.974289943 | 0.990490577 |
| g Clostridium J   | g Verticillium                 | -0.045120512 | 0.22305047  | 0.61039738  |
| g Clostridium J   | g unclassified Tremellomycetes | -0.066922856 | 0.070555907 | 0.439536772 |
| g Clostridium J   | g Candida                      | -0.042801854 | 0.247769721 | 0.629810038 |
| g Clostridium J   | g Cladosporium                 | -0.00189335  | 0.959243475 | 0.984847119 |
| g Clostridium J   | g Debaryomyces                 | 0.037335913  | 0.313418217 | 0.673419608 |
| g Clostridium J   | g Aspergillus                  | -0.003412469 | 0.926614338 | 0.974172444 |
| g Clostridium J   | g Kazachstania                 | 0.042823253  | 0.247533166 | 0.629733759 |
| g Clostridium J   | g Malassezia                   | -0.056080944 | 0.129808208 | 0.51752876  |
| g Clostridium J   | g unclassified Fungi           | -0.039988698 | 0.280250605 | 0.657094722 |
| g Clostridium J   | g Mycosphaerella               | 0.005363324  | 0.884899472 | 0.961818704 |
| g Clostridium J   | g Simplicillium                | 0.005546386  | 0.880999546 | 0.95982057  |
| g Clostridium J   | g unclassified Cordycipitaceae | 0.016395929  | 0.6580782   | 0.874757951 |
| g Clostridium J   | g unidentified                 | 0.00854756   | 0.817540715 | 0.936283373 |
| g Clostridium X   | g Verticillium                 | -0.067984857 | 0.066196966 | 0.428176217 |
| g Clostridium X   | g unclassified Tremellomycetes | -0.078987852 | 0.032738328 | 0.325586982 |
| g Clostridium X   | g Candida                      | -0.063806506 | 0.084718329 | 0.458909046 |
| g Clostridium X   | g Cladosporium                 | 0.027122842  | 0.464046295 | 0.769902759 |
| g Clostridium X   | g Debaryomyces                 | 0.030918156  | 0.403884647 | 0.736936858 |
| g Clostridium X   | g Aspergillus                  | -0.045988578 | 0.21426498  | 0.601936086 |
| g Clostridium X   | g Kazachstania                 | 0.011063391  | 0.765231328 | 0.916097697 |

|                      |                                |              |             |             |
|----------------------|--------------------------------|--------------|-------------|-------------|
| g Clostridium X      | g Malassezia                   | -0.044788945 | 0.226473161 | 0.612967811 |
| g Clostridium X      | g unclassified Fungi           | -0.033358076 | 0.367795773 | 0.716103178 |
| g Clostridium X      | g Mycosphaerella               | -0.005476979 | 0.88247785  | 0.960639915 |
| g Clostridium X      | g Simplicillium                | -0.03664442  | 0.322471193 | 0.679153248 |
| g Clostridium X      | g unclassified Cordycipitaceae | 0.002766868  | 0.940469344 | 0.978280409 |
| g Clostridium X      | g unidentified                 | -0.041912373 | 0.257742336 | 0.637448375 |
| g Clostridium B      | g Verticillium                 | -0.008384044 | 0.820971553 | 0.937561364 |
| g Clostridium B      | g unclassified Tremellomycetes | -0.00819923  | 0.824853376 | 0.939308882 |
| g Clostridium B      | g Candida                      | -0.029808931 | 0.420967424 | 0.74604389  |
| g Clostridium B      | g Cladosporium                 | 0.048490712  | 0.190341088 | 0.580290809 |
| g Clostridium B      | g Debaryomyces                 | -0.027128205 | 0.463957908 | 0.769892203 |
| g Clostridium B      | g Aspergillus                  | -0.052135898 | 0.159088333 | 0.555683436 |
| g Clostridium B      | g Kazachstania                 | 0.002802549  | 0.939703114 | 0.978000513 |
| g Clostridium B      | g Malassezia                   | 0.049913724  | 0.177642688 | 0.57328909  |
| g Clostridium B      | g unclassified Fungi           | -0.018812164 | 0.611594163 | 0.851846101 |
| g Clostridium B      | g Mycosphaerella               | -0.067067221 | 0.069949914 | 0.439536772 |
| g Clostridium B      | g Simplicillium                | 0.011571771  | 0.754781281 | 0.911600966 |
| g Clostridium B      | g unclassified Cordycipitaceae | 0.049692928  | 0.179570633 | 0.574257008 |
| g Clostridium B      | g unidentified                 | -0.030584485 | 0.408979332 | 0.74030436  |
| g Clostridium F      | g Verticillium                 | -0.030064871 | 0.416988664 | 0.744290485 |
| g Clostridium F      | g unclassified Tremellomycetes | -0.075404795 | 0.041536563 | 0.355902764 |
| g Clostridium F      | g Candida                      | -0.021035374 | 0.57015504  | 0.831953372 |
| g Clostridium F      | g Cladosporium                 | 0.020980099  | 0.571168931 | 0.832313398 |
| g Clostridium F      | g Debaryomyces                 | -0.013762716 | 0.710277434 | 0.902091837 |
| g Clostridium F      | g Aspergillus                  | -0.000364701 | 0.992146105 | 0.996941403 |
| g Clostridium F      | g Kazachstania                 | 0.006747099  | 0.855495397 | 0.950427981 |
| g Clostridium F      | g Malassezia                   | -0.001288859 | 0.972249363 | 0.990084454 |
| g Clostridium F      | g unclassified Fungi           | -0.064232197 | 0.082658109 | 0.455217912 |
| g Clostridium F      | g Mycosphaerella               | 0.000118856  | 0.99744039  | 0.998643711 |
| g Clostridium F      | g Simplicillium                | 0.012102729  | 0.743914775 | 0.909574751 |
| g Clostridium F      | g unclassified Cordycipitaceae | 0.040100143  | 0.278911337 | 0.656167134 |
| g Clostridium F      | g unidentified                 | -0.002163682 | 0.953430452 | 0.982873945 |
| g MGYG-HGUT-02719    | g Verticillium                 | 0.091197279  | 0.013639348 | 0.225653879 |
| g MGYG-HGUT-02719    | g unclassified Tremellomycetes | 0.016265625  | 0.66062506  | 0.876274631 |
| g MGYG-HGUT-02719    | g Candida                      | -0.039889117 | 0.281450976 | 0.657094722 |
| g MGYG-HGUT-02719    | g Cladosporium                 | 0.095322679  | 0.009917174 | 0.192910919 |
| g MGYG-HGUT-02719    | g Debaryomyces                 | -0.126967644 | 0.000579813 | 0.045979793 |
| g MGYG-HGUT-02719    | g Aspergillus                  | 0.042563995  | 0.25040974  | 0.631891676 |
| g MGYG-HGUT-02719    | g Kazachstania                 | -0.045623477 | 0.217929243 | 0.605493413 |
| g MGYG-HGUT-02719    | g Malassezia                   | 0.063685261  | 0.085312645 | 0.46036635  |
| g MGYG-HGUT-02719    | g unclassified Fungi           | 0.035241814  | 0.341351477 | 0.694699556 |
| g MGYG-HGUT-02719    | g Mycosphaerella               | 0.024221391  | 0.513208934 | 0.800999549 |
| g MGYG-HGUT-02719    | g Simplicillium                | 0.02573954   | 0.487152816 | 0.783154405 |
| g MGYG-HGUT-02719    | g unclassified Cordycipitaceae | 0.138184278  | 0.000178471 | 0.022444453 |
| g MGYG-HGUT-02719    | g unidentified                 | -0.013372753 | 0.718131839 | 0.903594675 |
| g Sporanaerobacter   | g Verticillium                 | 0.012602737  | 0.733727962 | 0.907315107 |
| g Sporanaerobacter   | g unclassified Tremellomycetes | -0.038161418 | 0.302831497 | 0.668756962 |
| g Sporanaerobacter   | g Candida                      | 0.007591473  | 0.837648338 | 0.943982397 |
| g Sporanaerobacter   | g Cladosporium                 | -0.034614322 | 0.350022157 | 0.702251818 |
| g Sporanaerobacter   | g Debaryomyces                 | 0.032470763  | 0.38068157  | 0.722837319 |
| g Sporanaerobacter   | g Aspergillus                  | -0.060288576 | 0.103373333 | 0.483295494 |
| g Sporanaerobacter   | g Kazachstania                 | 0.019086509  | 0.606409085 | 0.850274406 |
| g Sporanaerobacter   | g Malassezia                   | 0.014690504  | 0.691714805 | 0.893134834 |
| g Sporanaerobacter   | g unclassified Fungi           | -0.032075614 | 0.38650801  | 0.726599355 |
| g Sporanaerobacter   | g Mycosphaerella               | 0.030135091  | 0.415900935 | 0.743974758 |
| g Sporanaerobacter   | g Simplicillium                | 0.007578391  | 0.837924252 | 0.944192784 |
| g Sporanaerobacter   | g unclassified Cordycipitaceae | 0.039909174  | 0.281208927 | 0.657094722 |
| g Sporanaerobacter   | g unidentified                 | -0.016251906 | 0.66089344  | 0.876375094 |
| g Anaerosalibacter A | g Verticillium                 | 0.003782851  | 0.918675467 | 0.971792505 |
| g Anaerosalibacter A | g unclassified Tremellomycetes | -0.081789327 | 0.027017813 | 0.30473778  |
| g Anaerosalibacter A | g Candida                      | -0.064728191 | 0.080308956 | 0.45101344  |
| g Anaerosalibacter A | g Cladosporium                 | 0.013099495  | 0.723653456 | 0.906022347 |
| g Anaerosalibacter A | g Debaryomyces                 | 0.011127492  | 0.763911281 | 0.915477365 |
| g Anaerosalibacter A | g Aspergillus                  | 0.042911075  | 0.246563999 | 0.629733759 |
| g Anaerosalibacter A | g Kazachstania                 | 0.063310652  | 0.087170177 | 0.464936902 |
| g Anaerosalibacter A | g Malassezia                   | 0.014335404  | 0.698798339 | 0.895565462 |
| g Anaerosalibacter A | g unclassified Fungi           | -0.00753897  | 0.838755739 | 0.944502721 |
| g Anaerosalibacter A | g Mycosphaerella               | 0.024495017  | 0.508459748 | 0.798383435 |
| g Anaerosalibacter A | g Simplicillium                | 0.002934214  | 0.936876096 | 0.977563755 |
| g Anaerosalibacter A | g unclassified Cordycipitaceae | 0.069738572  | 0.059485109 | 0.412336263 |
| g Anaerosalibacter A | g unidentified                 | -0.040747742 | 0.271215024 | 0.649109772 |
| g Murdochiella       | g Verticillium                 | 0.092082535  | 0.012750269 | 0.220823806 |
| g Murdochiella       | g unclassified Tremellomycetes | -0.011886241 | 0.748339374 | 0.910244784 |
| g Murdochiella       | g Candida                      | -0.058112768 | 0.116453837 | 0.500117618 |
| g Murdochiella       | g Cladosporium                 | 0.00255847   | 0.944945748 | 0.980291673 |
| g Murdochiella       | g Debaryomyces                 | -0.053837761 | 0.145897551 | 0.540957635 |
| g Murdochiella       | g Aspergillus                  | 0.049368707  | 0.182429725 | 0.575048568 |
| g Murdochiella       | g Kazachstania                 | -0.018145105 | 0.624282386 | 0.8570016   |

|                   |                                |              |             |             |
|-------------------|--------------------------------|--------------|-------------|-------------|
| g Murdochiella    | g Malassezia                   | 0.052916388  | 0.152931228 | 0.549327311 |
| g Murdochiella    | g unclassified Fungi           | 0.098740901  | 0.007548574 | 0.168194189 |
| g Murdochiella    | g Mycosphaerella               | -0.043783444 | 0.237080868 | 0.62148426  |
| g Murdochiella    | g Simplicillium                | 0.066800557  | 0.071072632 | 0.441367716 |
| g Murdochiella    | g unclassified Cordycipitaceae | 0.084314592  | 0.022621095 | 0.283321191 |
| g Murdochiella    | g unidentified                 | -0.014497477 | 0.695562015 | 0.895089116 |
| g Anaerococcus    | g Verticillium                 | 0.001425624  | 0.969306041 | 0.988740749 |
| g Anaerococcus    | g unclassified Tremellomycetes | -0.040636127 | 0.272531044 | 0.649853264 |
| g Anaerococcus    | g Candida                      | -0.03634141  | 0.326491286 | 0.682388068 |
| g Anaerococcus    | g Cladosporium                 | 0.009345999  | 0.80083937  | 0.93044381  |
| g Anaerococcus    | g Debaryomyces                 | -0.022585367 | 0.542078058 | 0.816215242 |
| g Anaerococcus    | g Aspergillus                  | 0.003302346  | 0.928976199 | 0.974673427 |
| g Anaerococcus    | g Kazachstania                 | 0.042933485  | 0.246317119 | 0.629434951 |
| g Anaerococcus    | g Malassezia                   | 0.043928088  | 0.235533716 | 0.619373537 |
| g Anaerococcus    | g unclassified Fungi           | -0.0416719   | 0.260485516 | 0.638638484 |
| g Anaerococcus    | g Mycosphaerella               | -0.00510856  | 0.890331517 | 0.962904765 |
| g Anaerococcus    | g Simplicillium                | -0.039416337 | 0.287197433 | 0.659118237 |
| g Anaerococcus    | g unclassified Cordycipitaceae | 0.022307835  | 0.547054358 | 0.816368923 |
| g Anaerococcus    | g unidentified                 | -0.031848767 | 0.389877246 | 0.729587108 |
| g Parvimonas      | g Verticillium                 | -0.069197595 | 0.061492662 | 0.416324599 |
| g Parvimonas      | g unclassified Tremellomycetes | -0.01393663  | 0.706784384 | 0.900365443 |
| g Parvimonas      | g Candida                      | 0.016809064  | 0.650029518 | 0.870052588 |
| g Parvimonas      | g Cladosporium                 | -0.007369601 | 0.842330243 | 0.946034667 |
| g Parvimonas      | g Debaryomyces                 | 0.062966105  | 0.088907267 | 0.465955266 |
| g Parvimonas      | g Aspergillus                  | -0.017639607 | 0.633972411 | 0.861635763 |
| g Parvimonas      | g Kazachstania                 | 0.055298614  | 0.135255694 | 0.524661199 |
| g Parvimonas      | g Malassezia                   | -0.049015024 | 0.185586881 | 0.576715352 |
| g Parvimonas      | g unclassified Fungi           | -0.05260013  | 0.15540395  | 0.552672864 |
| g Parvimonas      | g Mycosphaerella               | -0.025694699 | 0.487912072 | 0.783353899 |
| g Parvimonas      | g Simplicillium                | -0.008981255 | 0.808458128 | 0.933453782 |
| g Parvimonas      | g unclassified Cordycipitaceae | -0.019130813 | 0.605573604 | 0.84989123  |
| g Parvimonas      | g unidentified                 | -0.048991182 | 0.185801156 | 0.577090648 |
| g Finegoldia      | g Verticillium                 | -0.016370238 | 0.658580034 | 0.874996133 |
| g Finegoldia      | g unclassified Tremellomycetes | -0.012659844 | 0.732567438 | 0.907315107 |
| g Finegoldia      | g Candida                      | 0.015155204  | 0.682485573 | 0.887523438 |
| g Finegoldia      | g Cladosporium                 | 0.066590299  | 0.071968223 | 0.442158914 |
| g Finegoldia      | g Debaryomyces                 | 0.027736902  | 0.453987615 | 0.765562228 |
| g Finegoldia      | g Aspergillus                  | 0.047540981  | 0.199179618 | 0.586641865 |
| g Finegoldia      | g Kazachstania                 | 0.009968003  | 0.78789083  | 0.925277255 |
| g Finegoldia      | g Malassezia                   | 0.000658323  | 0.985823424 | 0.994374556 |
| g Finegoldia      | g unclassified Fungi           | -0.066443695 | 0.07259812  | 0.442493968 |
| g Finegoldia      | g Mycosphaerella               | 0.011610074  | 0.753995719 | 0.91153556  |
| g Finegoldia      | g Simplicillium                | -0.000300364 | 0.993531584 | 0.99727144  |
| g Finegoldia      | g unclassified Cordycipitaceae | 0.039247272  | 0.289271402 | 0.660061436 |
| g Finegoldia      | g unidentified                 | -0.014386199 | 0.697783471 | 0.895302916 |
| g Ezakiella       | g Verticillium                 | 0.036631478  | 0.322642236 | 0.679172496 |
| g Ezakiella       | g unclassified Tremellomycetes | -0.035121118 | 0.343008508 | 0.695270538 |
| g Ezakiella       | g Candida                      | -0.007228934 | 0.84530148  | 0.947820248 |
| g Ezakiella       | g Cladosporium                 | 0.020140073  | 0.586681885 | 0.840897769 |
| g Ezakiella       | g Debaryomyces                 | 0.017346187  | 0.639626061 | 0.86388896  |
| g Ezakiella       | g Aspergillus                  | -0.028104544 | 0.448024635 | 0.762502994 |
| g Ezakiella       | g Kazachstania                 | 0.003995126  | 0.914129074 | 0.971160503 |
| g Ezakiella       | g Malassezia                   | 0.029048211  | 0.432923779 | 0.754104067 |
| g Ezakiella       | g unclassified Fungi           | -0.011974049 | 0.74654373  | 0.909815242 |
| g Ezakiella       | g Mycosphaerella               | 0.070359613  | 0.057247664 | 0.406846728 |
| g Ezakiella       | g Simplicillium                | -0.003271459 | 0.929638767 | 0.97525899  |
| g Ezakiella       | g unclassified Cordycipitaceae | 0.061281828  | 0.097803194 | 0.477597322 |
| g Ezakiella       | g unidentified                 | 0.012768484  | 0.730361328 | 0.907315107 |
| g Peptoniphilus A | g Verticillium                 | -0.011981137 | 0.746398853 | 0.909815242 |
| g Peptoniphilus A | g unclassified Tremellomycetes | -0.011121979 | 0.764024789 | 0.915477365 |
| g Peptoniphilus A | g Candida                      | -0.043782191 | 0.237094307 | 0.62148426  |
| g Peptoniphilus A | g Cladosporium                 | 0.049774819  | 0.178853771 | 0.574257008 |
| g Peptoniphilus A | g Debaryomyces                 | -0.093717561 | 0.011241911 | 0.205106732 |
| g Peptoniphilus A | g Aspergillus                  | 0.012936192  | 0.726960156 | 0.907012052 |
| g Peptoniphilus A | g Kazachstania                 | -0.005236308 | 0.887607022 | 0.962165284 |
| g Peptoniphilus A | g Malassezia                   | -0.030016564 | 0.417737922 | 0.74469385  |
| g Peptoniphilus A | g unclassified Fungi           | -0.032021225 | 0.387314196 | 0.727203277 |
| g Peptoniphilus A | g Mycosphaerella               | -0.058550369 | 0.113723782 | 0.497283084 |
| g Peptoniphilus A | g Simplicillium                | -0.010223861 | 0.782581231 | 0.922514306 |
| g Peptoniphilus A | g unclassified Cordycipitaceae | 0.072852573  | 0.04895746  | 0.381430576 |
| g Peptoniphilus A | g unidentified                 | -0.00719391  | 0.846041603 | 0.947820248 |
| g MGYG-HGUT-00373 | g Verticillium                 | 0.073029818  | 0.04840846  | 0.378609254 |
| g MGYG-HGUT-00373 | g unclassified Tremellomycetes | -0.104218392 | 0.004793153 | 0.136347166 |
| g MGYG-HGUT-00373 | g Candida                      | -0.059285069 | 0.109253629 | 0.492300296 |
| g MGYG-HGUT-00373 | g Cladosporium                 | 0.040033669  | 0.279709646 | 0.656601603 |
| g MGYG-HGUT-00373 | g Debaryomyces                 | -0.15349372  | 3.08E-05    | 0.011128631 |
| g MGYG-HGUT-00373 | g Aspergillus                  | 0.067398752  | 0.068574396 | 0.43623748  |
| g MGYG-HGUT-00373 | g Kazachstania                 | -0.044584555 | 0.228601574 | 0.613524642 |



|                   |                                |              |             |              |
|-------------------|--------------------------------|--------------|-------------|--------------|
| g MGYG-HGUT-00373 | g Malassezia                   | 0.064906336  | 0.079478549 | 0.45101344   |
| g MGYG-HGUT-00373 | g unclassified Fungi           | 0.052083917  | 0.15950495  | 0.55613884   |
| g MGYG-HGUT-00373 | g Mycosphaerella               | -0.002644502 | 0.94309755  | 0.979377652  |
| g MGYG-HGUT-00373 | g Simplicillium                | -0.004698578 | 0.899083804 | 0.965742873  |
| g MGYG-HGUT-00373 | g unclassified Cordycipitaceae | 0.092316652  | 0.012523871 | 0.219116895  |
| g MGYG-HGUT-00373 | g unidentified                 | 0.031084292  | 0.401362192 | 0.735790931  |
| g MGYG-HGUT-01016 | g Verticillium                 | 0.060076314  | 0.104595728 | 0.484602449  |
| g MGYG-HGUT-01016 | g unclassified Tremellomycetes | -0.095074605 | 0.010112389 | 0.194916761  |
| g MGYG-HGUT-01016 | g Candida                      | -0.040461515 | 0.274598562 | 0.652402779  |
| g MGYG-HGUT-01016 | g Cladosporium                 | 0.085140008  | 0.021325398 | 0.278255687  |
| g MGYG-HGUT-01016 | g Debaryomyces                 | -0.100878334 | 0.006338287 | 0.150048656  |
| g MGYG-HGUT-01016 | g Aspergillus                  | 0.06200556   | 0.093897308 | 0.47288973   |
| g MGYG-HGUT-01016 | g Kazachstania                 | -0.006751228 | 0.855407924 | 0.950427981  |
| g MGYG-HGUT-01016 | g Malassezia                   | 0.106806953  | 0.003839294 | 0.121638936  |
| g MGYG-HGUT-01016 | g unclassified Fungi           | 0.007879984  | 0.831568838 | 0.941140262  |
| g MGYG-HGUT-01016 | g Mycosphaerella               | -0.015716675 | 0.671397417 | 0.881634123  |
| g MGYG-HGUT-01016 | g Simplicillium                | 0.027261825  | 0.461758893 | 0.769075712  |
| g MGYG-HGUT-01016 | g unclassified Cordycipitaceae | 0.11444889   | 0.001940115 | 0.084840998  |
| g MGYG-HGUT-01016 | g unidentified                 | 0.009530353  | 0.796995716 | 0.929238701  |
| g MGYG-HGUT-01673 | g Verticillium                 | 0.051684893  | 0.162730537 | 0.560734138  |
| g MGYG-HGUT-01673 | g unclassified Tremellomycetes | -0.023207736 | 0.5310012   | 0.811415841  |
| g MGYG-HGUT-01673 | g Candida                      | -0.049277663 | 0.183238601 | 0.57555087   |
| g MGYG-HGUT-01673 | g Cladosporium                 | 0.108863606  | 0.003207979 | 0.111269104  |
| g MGYG-HGUT-01673 | g Debaryomyces                 | -0.078625874 | 0.033548087 | 0.3277113401 |
| g MGYG-HGUT-01673 | g Aspergillus                  | 0.016519793  | 0.655660874 | 0.87366908   |
| g MGYG-HGUT-01673 | g Kazachstania                 | -0.015961603 | 0.666582569 | 0.879421986  |
| g MGYG-HGUT-01673 | g Malassezia                   | 0.037984482  | 0.305080397 | 0.670057703  |
| g MGYG-HGUT-01673 | g unclassified Fungi           | 0.047754876  | 0.197163378 | 0.585839456  |
| g MGYG-HGUT-01673 | g Mycosphaerella               | -0.033117939 | 0.371256071 | 0.717854628  |
| g MGYG-HGUT-01673 | g Simplicillium                | 0.061364594  | 0.09735006  | 0.477459115  |
| g MGYG-HGUT-01673 | g unclassified Cordycipitaceae | 0.058249305  | 0.115596566 | 0.498339196  |
| g MGYG-HGUT-01673 | g unidentified                 | -0.019488867 | 0.598840296 | 0.846523771  |
| g MGYG-HGUT-00728 | g Verticillium                 | 0.044191801  | 0.232731335 | 0.617638717  |
| g MGYG-HGUT-00728 | g unclassified Tremellomycetes | -0.03936907  | 0.28777626  | 0.659362601  |
| g MGYG-HGUT-00728 | g Candida                      | -0.020718069 | 0.575986964 | 0.835860402  |
| g MGYG-HGUT-00728 | g Cladosporium                 | -0.003009002 | 0.935270677 | 0.977050887  |
| g MGYG-HGUT-00728 | g Debaryomyces                 | -0.110447587 | 0.002787809 | 0.101233889  |
| g MGYG-HGUT-00728 | g Aspergillus                  | 0.002877785  | 0.93808761  | 0.977628825  |
| g MGYG-HGUT-00728 | g Kazachstania                 | -0.079294638 | 0.032065169 | 0.323266606  |
| g MGYG-HGUT-00728 | g Malassezia                   | 0.025371182  | 0.493408745 | 0.787044217  |
| g MGYG-HGUT-00728 | g unclassified Fungi           | 0.03334055   | 0.368047639 | 0.716143358  |
| g MGYG-HGUT-00728 | g Mycosphaerella               | -0.045497681 | 0.219202125 | 0.60663028   |
| g MGYG-HGUT-00728 | g Simplicillium                | 0.018900838  | 0.609916104 | 0.851291399  |
| g MGYG-HGUT-00728 | g unclassified Cordycipitaceae | 0.030113629  | 0.416233204 | 0.743976838  |
| g MGYG-HGUT-00728 | g unidentified                 | -0.013113049 | 0.723379241 | 0.905975597  |
| g MGYG-HGUT-01779 | g Verticillium                 | 0.063928219  | 0.084125088 | 0.45780011   |
| g MGYG-HGUT-01779 | g unclassified Tremellomycetes | -0.069882558 | 0.058960021 | 0.411282099  |
| g MGYG-HGUT-01779 | g Candida                      | -0.081074562 | 0.028388765 | 0.309381988  |
| g MGYG-HGUT-01779 | g Cladosporium                 | 0.017312138  | 0.640283489 | 0.864117891  |
| g MGYG-HGUT-01779 | g Debaryomyces                 | -0.106828187 | 0.003832237 | 0.121638936  |
| g MGYG-HGUT-01779 | g Aspergillus                  | 0.028272761  | 0.445311103 | 0.76170364   |
| g MGYG-HGUT-01779 | g Kazachstania                 | -0.035966354 | 0.331512038 | 0.687450594  |
| g MGYG-HGUT-01779 | g Malassezia                   | 0.063206477  | 0.087692483 | 0.465488609  |
| g MGYG-HGUT-01779 | g unclassified Fungi           | 0.002297498  | 0.950553857 | 0.982403248  |
| g MGYG-HGUT-01779 | g Mycosphaerella               | -0.025877904 | 0.484814028 | 0.781546911  |
| g MGYG-HGUT-01779 | g Simplicillium                | 0.007829151  | 0.832639256 | 0.941546122  |
| g MGYG-HGUT-01779 | g unclassified Cordycipitaceae | 0.061145179  | 0.098555012 | 0.477955684  |
| g MGYG-HGUT-01779 | g unidentified                 | 0.008214256  | 0.824537615 | 0.939308882  |
| g Eubacterium     | g Verticillium                 | 0.030033003  | 0.417482859 | 0.744489993  |
| g Eubacterium     | g unclassified Tremellomycetes | -0.003868379 | 0.916843347 | 0.971437239  |
| g Eubacterium     | g Candida                      | -0.022539079 | 0.542906449 | 0.816215242  |
| g Eubacterium     | g Cladosporium                 | 0.092345054  | 0.012496648 | 0.219116895  |
| g Eubacterium     | g Debaryomyces                 | -0.062105011 | 0.093370477 | 0.472297508  |
| g Eubacterium     | g Aspergillus                  | 0.013404212  | 0.717497084 | 0.903293001  |
| g Eubacterium     | g Kazachstania                 | 0.024504544  | 0.508294815 | 0.798383435  |
| g Eubacterium     | g Malassezia                   | 0.033076106  | 0.371860918 | 0.717884076  |
| g Eubacterium     | g unclassified Fungi           | 0.009795208  | 0.791482293 | 0.926752811  |
| g Eubacterium     | g Mycosphaerella               | 0.005255857  | 0.887190217 | 0.962165284  |
| g Eubacterium     | g Simplicillium                | 0.033156581  | 0.370697892 | 0.717542285  |
| g Eubacterium     | g unclassified Cordycipitaceae | 0.020309303  | 0.583541046 | 0.83909415   |
| g Eubacterium     | g unidentified                 | -0.043937644 | 0.235431749 | 0.619373537  |
| g Anaerofustis    | g Verticillium                 | 0.015637532  | 0.672956116 | 0.882212788  |
| g Anaerofustis    | g unclassified Tremellomycetes | 0.033202694  | 0.370032478 | 0.71692327   |
| g Anaerofustis    | g Candida                      | -0.025925792 | 0.484005996 | 0.781048695  |
| g Anaerofustis    | g Cladosporium                 | 0.024654363  | 0.505704705 | 0.796097469  |
| g Anaerofustis    | g Debaryomyces                 | -0.009189997 | 0.804095667 | 0.931567807  |
| g Anaerofustis    | g Aspergillus                  | 0.010735188  | 0.772000573 | 0.917900008  |
| g Anaerofustis    | g Kazachstania                 | 0.040346216  | 0.275969629 | 0.653459524  |

|                   |                                |              |             |             |
|-------------------|--------------------------------|--------------|-------------|-------------|
| g Anaerofustis    | g Malassezia                   | 0.034906944  | 0.345961498 | 0.697400798 |
| g Anaerofustis    | g unclassified Fungi           | 0.030656567  | 0.407875516 | 0.739278343 |
| g Anaerofustis    | g Mycosphaerella               | -0.0058301   | 0.874961091 | 0.957673757 |
| g Anaerofustis    | g Simplicillium                | 0.027876586  | 0.451716759 | 0.764566018 |
| g Anaerofustis    | g unclassified Cordycipitaceae | -0.005859149 | 0.874343228 | 0.957497676 |
| g Anaerofustis    | g unidentified                 | 0.020798296  | 0.574509779 | 0.834736537 |
| g Garciella       | g Verticillium                 | -0.00298932  | 0.935693152 | 0.977250783 |
| g Garciella       | g unclassified Tremellomycetes | -0.003985303 | 0.914339402 | 0.971244685 |
| g Garciella       | g Candida                      | -0.017568458 | 0.63534137  | 0.862501946 |
| g Garciella       | g Cladosporium                 | 0.030939446  | 0.403560874 | 0.736936858 |
| g Garciella       | g Debaryomyces                 | -0.013685347 | 0.711833334 | 0.902091837 |
| g Garciella       | g Aspergillus                  | 0.067097521  | 0.069823271 | 0.439536772 |
| g Garciella       | g Kazachstania                 | 0.006254645  | 0.865938895 | 0.954967619 |
| g Garciella       | g Malassezia                   | 0.036178648  | 0.328664043 | 0.684206732 |
| g Garciella       | g unclassified Fungi           | 0.002485076  | 0.946522665 | 0.980691059 |
| g Garciella       | g Mycosphaerella               | 0.037509062  | 0.311177753 | 0.672399691 |
| g Garciella       | g Simplicillium                | 0.046806453  | 0.20621791  | 0.595517977 |
| g Garciella       | g unclassified Cordycipitaceae | 0.060524342  | 0.102028899 | 0.480707842 |
| g Garciella       | g unidentified                 | 0.035450422  | 0.338499594 | 0.693246121 |
| g MGYG-HGUT-01671 | g Verticillium                 | 0.040703397  | 0.271737356 | 0.649109772 |
| g MGYG-HGUT-01671 | g unclassified Tremellomycetes | -0.084239202 | 0.022742771 | 0.283321191 |
| g MGYG-HGUT-01671 | g Candida                      | -0.064123147 | 0.083181977 | 0.45547531  |
| g MGYG-HGUT-01671 | g Cladosporium                 | 0.009577022  | 0.796023471 | 0.928870963 |
| g MGYG-HGUT-01671 | g Debaryomyces                 | -0.132014129 | 0.000345131 | 0.0321046   |
| g MGYG-HGUT-01671 | g Aspergillus                  | 0.032429769  | 0.381283504 | 0.723098466 |
| g MGYG-HGUT-01671 | g Kazachstania                 | -0.087418712 | 0.018077688 | 0.260248809 |
| g MGYG-HGUT-01671 | g Malassezia                   | 0.00289986   | 0.937613658 | 0.977568509 |
| g MGYG-HGUT-01671 | g unclassified Fungi           | 0.022349862  | 0.54629933  | 0.816307334 |
| g MGYG-HGUT-01671 | g Mycosphaerella               | 0.005773785  | 0.876159114 | 0.957801213 |
| g MGYG-HGUT-01671 | g Simplicillium                | -0.011596428 | 0.754275549 | 0.91153556  |
| g MGYG-HGUT-01671 | g unclassified Cordycipitaceae | 0.090113838  | 0.014801509 | 0.235533182 |
| g MGYG-HGUT-01671 | g unidentified                 | 0.013696127  | 0.711616479 | 0.902091837 |
| g MGYG-HGUT-04079 | g Verticillium                 | 0.034995859  | 0.344733599 | 0.696679266 |
| g MGYG-HGUT-04079 | g unclassified Tremellomycetes | 0.017478349  | 0.637076931 | 0.863812758 |
| g MGYG-HGUT-04079 | g Candida                      | -0.067539267 | 0.067998134 | 0.435112406 |
| g MGYG-HGUT-04079 | g Cladosporium                 | -0.029434036 | 0.426835361 | 0.74986268  |
| g MGYG-HGUT-04079 | g Debaryomyces                 | -0.003781137 | 0.918712174 | 0.971792505 |
| g MGYG-HGUT-04079 | g Aspergillus                  | 0.030849926  | 0.404923321 | 0.737438672 |
| g MGYG-HGUT-04079 | g Kazachstania                 | 0.003970232  | 0.914662103 | 0.971294969 |
| g MGYG-HGUT-04079 | g Malassezia                   | -0.020533982 | 0.579383235 | 0.836772676 |
| g MGYG-HGUT-04079 | g unclassified Fungi           | 0.001318138  | 0.971619216 | 0.989767997 |
| g MGYG-HGUT-04079 | g Mycosphaerella               | -0.032412831 | 0.381532384 | 0.723098466 |
| g MGYG-HGUT-04079 | g Simplicillium                | 0.053168505  | 0.150981494 | 0.547949889 |
| g MGYG-HGUT-04079 | g unclassified Cordycipitaceae | 0.0513815    | 0.165215752 | 0.562434723 |
| g MGYG-HGUT-04079 | g unidentified                 | -0.037412693 | 0.312423426 | 0.672824117 |
| g MGYG-HGUT-03776 | g Verticillium                 | 0.083909228  | 0.023282042 | 0.285641852 |
| g MGYG-HGUT-03776 | g unclassified Tremellomycetes | -0.089876935 | 0.015066933 | 0.238323293 |
| g MGYG-HGUT-03776 | g Candida                      | -0.088003408 | 0.017317519 | 0.256989733 |
| g MGYG-HGUT-03776 | g Cladosporium                 | 0.042273491  | 0.253660583 | 0.634509259 |
| g MGYG-HGUT-03776 | g Debaryomyces                 | -0.101290167 | 0.0061262   | 0.148686802 |
| g MGYG-HGUT-03776 | g Aspergillus                  | 0.052164366  | 0.158860516 | 0.555285495 |
| g MGYG-HGUT-03776 | g Kazachstania                 | -0.098435237 | 0.007737593 | 0.169228729 |
| g MGYG-HGUT-03776 | g Malassezia                   | 0.042270791  | 0.253690925 | 0.634509259 |
| g MGYG-HGUT-03776 | g unclassified Fungi           | 0.035936894  | 0.33190851  | 0.68778737  |
| g MGYG-HGUT-03776 | g Mycosphaerella               | 0.00453762   | 0.902523345 | 0.966636316 |
| g MGYG-HGUT-03776 | g Simplicillium                | 0.029641219  | 0.423586623 | 0.747439326 |
| g MGYG-HGUT-03776 | g unclassified Cordycipitaceae | 0.08448151   | 0.022353701 | 0.283321191 |
| g MGYG-HGUT-03776 | g unidentified                 | 0.043515783  | 0.23996273  | 0.623443558 |
| g MGYG-HGUT-03766 | g Verticillium                 | 0.012961135  | 0.726454753 | 0.907012052 |
| g MGYG-HGUT-03766 | g unclassified Tremellomycetes | 0.009885996  | 0.78959474  | 0.92612409  |
| g MGYG-HGUT-03766 | g Candida                      | -0.009772226 | 0.791960287 | 0.926952638 |
| g MGYG-HGUT-03766 | g Cladosporium                 | 0.037505906  | 0.311218506 | 0.672399691 |
| g MGYG-HGUT-03766 | g Debaryomyces                 | -0.022328665 | 0.546680079 | 0.816368923 |
| g MGYG-HGUT-03766 | g Aspergillus                  | -0.056828056 | 0.124766123 | 0.509955624 |
| g MGYG-HGUT-03766 | g Kazachstania                 | -0.039185515 | 0.290031495 | 0.660061436 |
| g MGYG-HGUT-03766 | g Malassezia                   | 0.008381685  | 0.821021085 | 0.937561364 |
| g MGYG-HGUT-03766 | g unclassified Fungi           | -0.007046697 | 0.849154016 | 0.948917865 |
| g MGYG-HGUT-03766 | g Mycosphaerella               | -0.082898028 | 0.025004179 | 0.293745688 |
| g MGYG-HGUT-03766 | g Simplicillium                | 0.021952176  | 0.553464319 | 0.820504263 |
| g MGYG-HGUT-03766 | g unclassified Cordycipitaceae | 0.052889148  | 0.153143027 | 0.549714896 |
| g MGYG-HGUT-03766 | g unidentified                 | -0.051571543 | 0.163655724 | 0.56154503  |
| g Escherichia     | g Verticillium                 | -0.020888576 | 0.57284962  | 0.833746781 |
| g Escherichia     | g unclassified Tremellomycetes | 0.006459872  | 0.861583682 | 0.953015155 |
| g Escherichia     | g Candida                      | 0.003012301  | 0.935199846 | 0.977050887 |
| g Escherichia     | g Cladosporium                 | -0.012485085 | 0.736120794 | 0.907602097 |
| g Escherichia     | g Debaryomyces                 | 0.016207253  | 0.661767243 | 0.87699699  |
| g Escherichia     | g Aspergillus                  | 0.042621316  | 0.249771739 | 0.631737101 |
| g Escherichia     | g Kazachstania                 | 0.036952842  | 0.318412527 | 0.676223819 |

|                 |                                |              |             |             |
|-----------------|--------------------------------|--------------|-------------|-------------|
| g Escherichia   | g Malassezia                   | -0.022415808 | 0.545115657 | 0.816215242 |
| g Escherichia   | g unclassified Fungi           | -0.066273523 | 0.073334924 | 0.443491766 |
| g Escherichia   | g Mycosphaerella               | 0.022268892  | 0.547754422 | 0.816743504 |
| g Escherichia   | g Simplicillium                | 0.017674184  | 0.633307562 | 0.861635763 |
| g Escherichia   | g unclassified Cordycipitaceae | -0.032226097 | 0.384282778 | 0.725207645 |
| g Escherichia   | g unidentified                 | 0.003044229  | 0.934514552 | 0.976793554 |
| g Klebsiella    | g Verticillium                 | -0.005141266 | 0.889633867 | 0.962882845 |
| g Klebsiella    | g unclassified Tremellomycetes | -0.036889008 | 0.31924979  | 0.677014283 |
| g Klebsiella    | g Candida                      | -4.20E-05    | 0.999096384 | 0.999354878 |
| g Klebsiella    | g Cladosporium                 | -0.039535658 | 0.285739726 | 0.658995314 |
| g Klebsiella    | g Debaryomyces                 | -0.019497748 | 0.598673724 | 0.846523771 |
| g Klebsiella    | g Aspergillus                  | -0.019560934 | 0.597489163 | 0.845950003 |
| g Klebsiella    | g Kazachstania                 | -0.006767228 | 0.85506905  | 0.950427981 |
| g Klebsiella    | g Malassezia                   | -0.051887666 | 0.161085301 | 0.558154765 |
| g Klebsiella    | g unclassified Fungi           | -0.021371242 | 0.564012702 | 0.828451033 |
| g Klebsiella    | g Mycosphaerella               | 0.064561131  | 0.081094074 | 0.452126167 |
| g Klebsiella    | g Simplicillium                | -0.044027779 | 0.234471548 | 0.618901952 |
| g Klebsiella    | g unclassified Cordycipitaceae | -0.061409772 | 0.097103424 | 0.477459115 |
| g Klebsiella    | g unidentified                 | 0.027643065  | 0.45551674  | 0.766096335 |
| g Enterobacter  | g Verticillium                 | -0.065757887 | 0.075604842 | 0.44521449  |
| g Enterobacter  | g unclassified Tremellomycetes | -0.010089822 | 0.785361591 | 0.924135173 |
| g Enterobacter  | g Candida                      | 0.069502283  | 0.060355197 | 0.412830947 |
| g Enterobacter  | g Cladosporium                 | -0.025219336 | 0.496000026 | 0.788597496 |
| g Enterobacter  | g Debaryomyces                 | 0.047028851  | 0.204068108 | 0.593581285 |
| g Enterobacter  | g Aspergillus                  | 0.01805133   | 0.626075155 | 0.8579572   |
| g Enterobacter  | g Kazachstania                 | 0.017341728  | 0.639712142 | 0.86388896  |
| g Enterobacter  | g Malassezia                   | -0.057787008 | 0.1185193   | 0.502487018 |
| g Enterobacter  | g unclassified Fungi           | -0.041304045 | 0.264720681 | 0.64234852  |
| g Enterobacter  | g Mycosphaerella               | 0.019892988  | 0.591281663 | 0.842715602 |
| g Enterobacter  | g Simplicillium                | -0.002179895 | 0.953081895 | 0.98283236  |
| g Enterobacter  | g unclassified Cordycipitaceae | -0.076628888 | 0.038329197 | 0.344312023 |
| g Enterobacter  | g unidentified                 | -0.024714208 | 0.504672025 | 0.795181561 |
| g Citrobacter   | g Verticillium                 | -0.073058515 | 0.048320059 | 0.378604998 |
| g Citrobacter   | g unclassified Tremellomycetes | -0.010716779 | 0.772380783 | 0.918101184 |
| g Citrobacter   | g Candida                      | 0.033358037  | 0.367796331 | 0.716103178 |
| g Citrobacter   | g Cladosporium                 | -0.045043636 | 0.223840734 | 0.610957608 |
| g Citrobacter   | g Debaryomyces                 | 0.066535568  | 0.072202854 | 0.442158914 |
| g Citrobacter   | g Aspergillus                  | 0.047397578  | 0.200539768 | 0.589026791 |
| g Citrobacter   | g Kazachstania                 | 0.022648356  | 0.540951773 | 0.815420595 |
| g Citrobacter   | g Malassezia                   | -0.047806942 | 0.196674859 | 0.585710858 |
| g Citrobacter   | g unclassified Fungi           | -0.035233752 | 0.341462    | 0.694699556 |
| g Citrobacter   | g Mycosphaerella               | 0.012256432  | 0.740778474 | 0.90933095  |
| g Citrobacter   | g Simplicillium                | -0.028817361 | 0.436590502 | 0.755981115 |
| g Citrobacter   | g unclassified Cordycipitaceae | -0.0671121   | 0.069762399 | 0.439536772 |
| g Citrobacter   | g unidentified                 | 0.011611692  | 0.753962531 | 0.91153556  |
| g Klebsiella A  | g Verticillium                 | -0.049861552 | 0.17809685  | 0.573729188 |
| g Klebsiella A  | g unclassified Tremellomycetes | -0.009366152 | 0.800418941 | 0.930057455 |
| g Klebsiella A  | g Candida                      | 0.043604242  | 0.239007595 | 0.622994378 |
| g Klebsiella A  | g Cladosporium                 | -0.057082619 | 0.123083386 | 0.508016722 |
| g Klebsiella A  | g Debaryomyces                 | 0.027779242  | 0.453298622 | 0.765162867 |
| g Klebsiella A  | g Aspergillus                  | 0.004935221  | 0.894030404 | 0.964392857 |
| g Klebsiella A  | g Kazachstania                 | 0.001104514  | 0.976217267 | 0.990831929 |
| g Klebsiella A  | g Malassezia                   | -0.052590251 | 0.155481678 | 0.552672864 |
| g Klebsiella A  | g unclassified Fungi           | -0.076366769 | 0.038997731 | 0.346203016 |
| g Klebsiella A  | g Mycosphaerella               | 0.027999129  | 0.449729854 | 0.763196957 |
| g Klebsiella A  | g Simplicillium                | -0.011000061 | 0.766536134 | 0.916448466 |
| g Klebsiella A  | g unclassified Cordycipitaceae | -0.086458243 | 0.019389775 | 0.268956611 |
| g Klebsiella A  | g unidentified                 | -0.011261187 | 0.761160316 | 0.914567783 |
| g Citrobacter A | g Verticillium                 | -0.021015885 | 0.570512413 | 0.831953372 |
| g Citrobacter A | g unclassified Tremellomycetes | 0.013670116  | 0.712139776 | 0.902091837 |
| g Citrobacter A | g Candida                      | 0.04064417   | 0.272436063 | 0.649853264 |
| g Citrobacter A | g Cladosporium                 | -0.014875001 | 0.68804502  | 0.891065034 |
| g Citrobacter A | g Debaryomyces                 | 0.054503273  | 0.140972767 | 0.535462188 |
| g Citrobacter A | g Aspergillus                  | 0.01149296   | 0.756398397 | 0.912160437 |
| g Citrobacter A | g Kazachstania                 | 0.011226953  | 0.761864449 | 0.914666261 |
| g Citrobacter A | g Malassezia                   | -0.057794319 | 0.118472637 | 0.502487018 |
| g Citrobacter A | g unclassified Fungi           | -0.069036605 | 0.062100789 | 0.417170577 |
| g Citrobacter A | g Mycosphaerella               | 0.036282123  | 0.327281635 | 0.682858146 |
| g Citrobacter A | g Simplicillium                | -0.000716246 | 0.984576251 | 0.993874453 |
| g Citrobacter A | g unclassified Cordycipitaceae | -0.027261343 | 0.461766805 | 0.769075712 |
| g Citrobacter A | g unidentified                 | -0.035682932 | 0.33533898  | 0.690649492 |
| g Kluyvera      | g Verticillium                 | -0.031462181 | 0.395659924 | 0.731875892 |
| g Kluyvera      | g unclassified Tremellomycetes | 0.000392374  | 0.991550199 | 0.996730712 |
| g Kluyvera      | g Candida                      | 0.022427899  | 0.544898777 | 0.816215242 |
| g Kluyvera      | g Cladosporium                 | -0.033541557 | 0.365165431 | 0.713953478 |
| g Kluyvera      | g Debaryomyces                 | 0.047745186  | 0.197254393 | 0.585839456 |
| g Kluyvera      | g Aspergillus                  | 0.039498495  | 0.286193196 | 0.659056958 |
| g Kluyvera      | g Kazachstania                 | 0.018047002  | 0.626157953 | 0.8579572   |

|                 |                                |              |             |             |
|-----------------|--------------------------------|--------------|-------------|-------------|
| g Kluyvera      | g Malassezia                   | -0.080783031 | 0.028964874 | 0.31117391  |
| g Kluyvera      | g unclassified Fungi           | -0.052263617 | 0.158068175 | 0.554768804 |
| g Kluyvera      | g Mycosphaerella               | 0.01402656   | 0.704980547 | 0.898763556 |
| g Kluyvera      | g Simplicillium                | 0.014868531  | 0.688173589 | 0.891122482 |
| g Kluyvera      | g unclassified Cordycipitaceae | -0.060705814 | 0.101003559 | 0.478906569 |
| g Kluyvera      | g unidentified                 | -0.038014197 | 0.304701951 | 0.670057703 |
| g Raoultella    | g Verticillium                 | -0.039688925 | 0.283874652 | 0.658002559 |
| g Raoultella    | g unclassified Tremellomycetes | -0.023079228 | 0.533278941 | 0.811502452 |
| g Raoultella    | g Candida                      | 0.037548173  | 0.310673147 | 0.672399691 |
| g Raoultella    | g Cladosporium                 | -0.040717731 | 0.271568446 | 0.649109772 |
| g Raoultella    | g Debaryomyces                 | 0.06373288   | 0.08507883  | 0.459591722 |
| g Raoultella    | g Aspergillus                  | 0.056044435  | 0.130058585 | 0.51759306  |
| g Raoultella    | g Kazachstania                 | 0.015967508  | 0.666466656 | 0.879421986 |
| g Raoultella    | g Malassezia                   | -0.071511518 | 0.053282565 | 0.396176014 |
| g Raoultella    | g unclassified Fungi           | -0.018410209 | 0.619226201 | 0.856084166 |
| g Raoultella    | g Mycosphaerella               | 0.022003591  | 0.552535408 | 0.820336555 |
| g Raoultella    | g Simplicillium                | 0.004718082  | 0.898667156 | 0.965643451 |
| g Raoultella    | g unclassified Cordycipitaceae | -0.066931611 | 0.070519033 | 0.439536772 |
| g Raoultella    | g unidentified                 | -0.018895773 | 0.610011902 | 0.851291399 |
| g Metakosakonia | g Verticillium                 | -0.028666521 | 0.438996011 | 0.75782313  |
| g Metakosakonia | g unclassified Tremellomycetes | -0.023926317 | 0.518356085 | 0.803816543 |
| g Metakosakonia | g Candida                      | 0.003634196  | 0.92186085  | 0.973663191 |
| g Metakosakonia | g Cladosporium                 | -0.032178088 | 0.384991839 | 0.725207645 |
| g Metakosakonia | g Debaryomyces                 | 0.035709327  | 0.334981379 | 0.690181649 |
| g Metakosakonia | g Aspergillus                  | 0.010905368  | 0.768488387 | 0.916865092 |
| g Metakosakonia | g Kazachstania                 | -0.009174164 | 0.804426348 | 0.931596653 |
| g Metakosakonia | g Malassezia                   | -0.070136418 | 0.058043601 | 0.407963088 |
| g Metakosakonia | g unclassified Fungi           | -0.077003615 | 0.037390359 | 0.341384621 |
| g Metakosakonia | g Mycosphaerella               | 0.047775463  | 0.196970108 | 0.58576073  |
| g Metakosakonia | g Simplicillium                | -0.041245743 | 0.26539624  | 0.643202556 |
| g Metakosakonia | g unclassified Cordycipitaceae | -0.063652785 | 0.085472409 | 0.460376939 |
| g Metakosakonia | g unidentified                 | -0.010337697 | 0.78022128  | 0.921399239 |
| g Klebsiella B  | g Verticillium                 | 0.00561926   | 0.879447845 | 0.959304186 |
| g Klebsiella B  | g unclassified Tremellomycetes | -0.009399567 | 0.799722009 | 0.929905946 |
| g Klebsiella B  | g Candida                      | -0.008504741 | 0.818438796 | 0.936487497 |
| g Klebsiella B  | g Cladosporium                 | -0.012273218 | 0.740436206 | 0.909177992 |
| g Klebsiella B  | g Debaryomyces                 | 0.011876897  | 0.748530534 | 0.910244784 |
| g Klebsiella B  | g Aspergillus                  | 0.00778406   | 0.833589044 | 0.941798648 |
| g Klebsiella B  | g Kazachstania                 | 0.01648023   | 0.65643261  | 0.874087061 |
| g Klebsiella B  | g Malassezia                   | -0.028619997 | 0.439739465 | 0.758246834 |
| g Klebsiella B  | g unclassified Fungi           | -0.024629808 | 0.50612874  | 0.796409566 |
| g Klebsiella B  | g Mycosphaerella               | 0.073505571  | 0.04696031  | 0.375701373 |
| g Klebsiella B  | g Simplicillium                | -0.036813588 | 0.320240878 | 0.677486799 |
| g Klebsiella B  | g unclassified Cordycipitaceae | -0.023894835 | 0.518906816 | 0.80396368  |
| g Klebsiella B  | g unidentified                 | -0.00354586  | 0.923754315 | 0.974172444 |
| g Citrobacter B | g Verticillium                 | -0.057615179 | 0.119620266 | 0.503129929 |
| g Citrobacter B | g unclassified Tremellomycetes | 0.02461665   | 0.506356046 | 0.796460015 |
| g Citrobacter B | g Candida                      | 0.027712148  | 0.454390716 | 0.765814499 |
| g Citrobacter B | g Cladosporium                 | 0.001266863  | 0.97272279  | 0.990221507 |
| g Citrobacter B | g Debaryomyces                 | 0.03646686   | 0.324822985 | 0.681323455 |
| g Citrobacter B | g Aspergillus                  | 0.033763574  | 0.361998375 | 0.712813887 |
| g Citrobacter B | g Kazachstania                 | 0.018394463  | 0.619526016 | 0.856123107 |
| g Citrobacter B | g Malassezia                   | -0.069138323 | 0.061715983 | 0.416988935 |
| g Citrobacter B | g unclassified Fungi           | -0.031651331 | 0.392824125 | 0.730757316 |
| g Citrobacter B | g Mycosphaerella               | 0.049830351  | 0.178368869 | 0.573729188 |
| g Citrobacter B | g Simplicillium                | -0.011792901 | 0.750249626 | 0.910387945 |
| g Citrobacter B | g unclassified Cordycipitaceae | -0.068417027 | 0.0644877   | 0.423004068 |
| g Citrobacter B | g unidentified                 | -0.03023971  | 0.414283446 | 0.742882112 |
| g Yersinia      | g Verticillium                 | -0.030815119 | 0.405453819 | 0.737835308 |
| g Yersinia      | g unclassified Tremellomycetes | -0.002219414 | 0.952232334 | 0.982634054 |
| g Yersinia      | g Candida                      | 0.056371817  | 0.127826724 | 0.51521926  |
| g Yersinia      | g Cladosporium                 | -0.009615881 | 0.795214173 | 0.928393246 |
| g Yersinia      | g Debaryomyces                 | 0.064256018  | 0.082544029 | 0.455217912 |
| g Yersinia      | g Aspergillus                  | 0.025972318  | 0.483221622 | 0.780449413 |
| g Yersinia      | g Kazachstania                 | 0.00830087   | 0.822718001 | 0.938379371 |
| g Yersinia      | g Malassezia                   | -0.061059499 | 0.099028753 | 0.478099877 |
| g Yersinia      | g unclassified Fungi           | -0.050622363 | 0.171558924 | 0.565255978 |
| g Yersinia      | g Mycosphaerella               | 0.07279985   | 0.049121768 | 0.381649452 |
| g Yersinia      | g Simplicillium                | 0.008503459  | 0.818465697 | 0.936487497 |
| g Yersinia      | g unclassified Cordycipitaceae | -0.024444144 | 0.509340991 | 0.798783891 |
| g Yersinia      | g unidentified                 | -0.005218408 | 0.887988699 | 0.962251366 |
| g Cronobacter   | g Verticillium                 | -0.056525137 | 0.126791768 | 0.513521254 |
| g Cronobacter   | g unclassified Tremellomycetes | 0.029794186  | 0.42119732  | 0.74604389  |
| g Cronobacter   | g Candida                      | 0.019708137  | 0.594733667 | 0.844389068 |
| g Cronobacter   | g Cladosporium                 | -0.025276089 | 0.495030674 | 0.877731518 |
| g Cronobacter   | g Debaryomyces                 | 0.035262324  | 0.341070404 | 0.694699556 |
| g Cronobacter   | g Aspergillus                  | 0.040084605  | 0.279097803 | 0.656450724 |
| g Cronobacter   | g Kazachstania                 | 0.018644302  | 0.614776353 | 0.853151823 |



|                    |                                |              |             |             |
|--------------------|--------------------------------|--------------|-------------|-------------|
| g Cronobacter      | g Malassezia                   | -0.042561299 | 0.250439774 | 0.631891676 |
| g Cronobacter      | g unclassified Fungi           | -0.064106368 | 0.083262822 | 0.455577655 |
| g Cronobacter      | g Mycosphaerella               | 0.027049713  | 0.465252388 | 0.77119373  |
| g Cronobacter      | g Simplicillium                | -0.001902928 | 0.95903747  | 0.984847119 |
| g Cronobacter      | g unclassified Cordycipitaceae | -0.043631987 | 0.238708567 | 0.622994378 |
| g Cronobacter      | g unidentified                 | -0.03087022  | 0.404614227 | 0.737438672 |
| g Pantoea          | g Verticillium                 | -0.087752922 | 0.017639684 | 0.258178618 |
| g Pantoea          | g unclassified Tremellomycetes | -0.003013325 | 0.935177869 | 0.977050887 |
| g Pantoea          | g Candida                      | 0.032990607  | 0.373099024 | 0.718484102 |
| g Pantoea          | g Cladosporium                 | -0.073321927 | 0.047514937 | 0.377185783 |
| g Pantoea          | g Debaryomyces                 | 0.066131393  | 0.073954979 | 0.444193078 |
| g Pantoea          | g Aspergillus                  | 0.037489584  | 0.31142927  | 0.672399691 |
| g Pantoea          | g Kazachstania                 | 0.008205945  | 0.824712263 | 0.939308882 |
| g Pantoea          | g Malassezia                   | -0.098166315 | 0.007907379 | 0.171116339 |
| g Pantoea          | g unclassified Fungi           | -0.060394599 | 0.102767018 | 0.482387553 |
| g Pantoea          | g Mycosphaerella               | 0.022393385  | 0.518224351 | 0.803768376 |
| g Pantoea          | g Simplicillium                | 0.007019448  | 0.849730385 | 0.948917865 |
| g Pantoea          | g unclassified Cordycipitaceae | -0.078768698 | 0.033226564 | 0.326769053 |
| g Pantoea          | g unidentified                 | 0.001774656  | 0.961796485 | 0.986088037 |
| g Salmonella       | g Verticillium                 | -0.023149046 | 0.532040842 | 0.811490628 |
| g Salmonella       | g unclassified Tremellomycetes | -0.010326371 | 0.780456755 | 0.921452255 |
| g Salmonella       | g Candida                      | 0.037133121  | 0.316055687 | 0.675194937 |
| g Salmonella       | g Cladosporium                 | -0.005381128 | 0.884520044 | 0.961776517 |
| g Salmonella       | g Debaryomyces                 | 0.036819495  | 0.320163188 | 0.677486799 |
| g Salmonella       | g Aspergillus                  | 0.042352724  | 0.252771043 | 0.633844354 |
| g Salmonella       | g Kazachstania                 | -0.011015458 | 0.766218848 | 0.916276173 |
| g Salmonella       | g Malassezia                   | -0.045718776 | 0.216968491 | 0.604563228 |
| g Salmonella       | g unclassified Fungi           | -0.060830528 | 0.100303676 | 0.478819278 |
| g Salmonella       | g Mycosphaerella               | 0.047714519  | 0.197542654 | 0.58591995  |
| g Salmonella       | g Simplicillium                | 0.001540839  | 0.966826806 | 0.988470889 |
| g Salmonella       | g unclassified Cordycipitaceae | -0.041005547 | 0.268191954 | 0.645333158 |
| g Salmonella       | g unidentified                 | -0.026826761 | 0.468940172 | 0.77312422  |
| g Enterobacter D   | g Verticillium                 | -0.033009061 | 0.372831578 | 0.718373632 |
| g Enterobacter D   | g unclassified Tremellomycetes | 0.019189674  | 0.604464371 | 0.849300857 |
| g Enterobacter D   | g Candida                      | 0.033454822  | 0.366407383 | 0.715505247 |
| g Enterobacter D   | g Cladosporium                 | -0.04822327  | 0.192800325 | 0.581782946 |
| g Enterobacter D   | g Debaryomyces                 | 0.041042946  | 0.267755335 | 0.644978472 |
| g Enterobacter D   | g Aspergillus                  | 0.023318995  | 0.529033174 | 0.80992897  |
| g Enterobacter D   | g Kazachstania                 | 0.017774891  | 0.631372877 | 0.860229872 |
| g Enterobacter D   | g Malassezia                   | -0.05139532  | 0.165101936 | 0.562434723 |
| g Enterobacter D   | g unclassified Fungi           | -0.068500043 | 0.064163565 | 0.423004068 |
| g Enterobacter D   | g Mycosphaerella               | 0.032911353  | 0.37424897  | 0.718546866 |
| g Enterobacter D   | g Simplicillium                | 0.003523995  | 0.92422305  | 0.974172444 |
| g Enterobacter D   | g unclassified Cordycipitaceae | -0.041809506 | 0.25891332  | 0.637931914 |
| g Enterobacter D   | g unidentified                 | -0.034481166 | 0.351879886 | 0.703759772 |
| g Providencia      | g Verticillium                 | -0.062266892 | 0.092517994 | 0.471664958 |
| g Providencia      | g unclassified Tremellomycetes | -0.026841817 | 0.468690624 | 0.77312422  |
| g Providencia      | g Candida                      | 0.061641202  | 0.095847804 | 0.476405236 |
| g Providencia      | g Cladosporium                 | -0.012607324 | 0.733634722 | 0.907315107 |
| g Providencia      | g Debaryomyces                 | 0.046001621  | 0.214134895 | 0.601852711 |
| g Providencia      | g Aspergillus                  | 0.009095277  | 0.806074452 | 0.9323292   |
| g Providencia      | g Kazachstania                 | 0.029149846  | 0.431315103 | 0.753212133 |
| g Providencia      | g Malassezia                   | -0.062176308 | 0.092994248 | 0.471954484 |
| g Providencia      | g unclassified Fungi           | -0.03074829  | 0.406473513 | 0.738420989 |
| g Providencia      | g Mycosphaerella               | 0.029493261  | 0.425905213 | 0.749530844 |
| g Providencia      | g Simplicillium                | -0.041893456 | 0.257957406 | 0.637448375 |
| g Providencia      | g unclassified Cordycipitaceae | -0.027665368 | 0.455153043 | 0.765971612 |
| g Providencia      | g unidentified                 | -0.020543466 | 0.579208029 | 0.836772676 |
| g Kosakonia        | g Verticillium                 | 0.003059169  | 0.934193897 | 0.976739727 |
| g Kosakonia        | g unclassified Tremellomycetes | -0.014183927 | 0.701828033 | 0.897212331 |
| g Kosakonia        | g Candida                      | -0.001529078 | 0.967079863 | 0.988470889 |
| g Kosakonia        | g Cladosporium                 | 0.004343713  | 0.906669398 | 0.968444087 |
| g Kosakonia        | g Debaryomyces                 | 0.055250899  | 0.135593563 | 0.525612724 |
| g Kosakonia        | g Aspergillus                  | -0.059448115 | 0.108280658 | 0.490260184 |
| g Kosakonia        | g Kazachstania                 | 0.06564899   | 0.076091471 | 0.446374478 |
| g Kosakonia        | g Malassezia                   | 0.0258148    | 0.485879927 | 0.782411275 |
| g Kosakonia        | g unclassified Fungi           | -0.050056752 | 0.176402039 | 0.571901463 |
| g Kosakonia        | g Mycosphaerella               | 0.049718702  | 0.179344779 | 0.574257008 |
| g Kosakonia        | g Simplicillium                | -0.000342205 | 0.992630547 | 0.996941403 |
| g Kosakonia        | g unclassified Cordycipitaceae | 0.008597516  | 0.816493257 | 0.935686771 |
| g Kosakonia        | g unidentified                 | -0.046185326 | 0.212308839 | 0.600680647 |
| g Pseudoscherichia | g Verticillium                 | -0.048921778 | 0.186425923 | 0.577226032 |
| g Pseudoscherichia | g unclassified Tremellomycetes | 0.013614838  | 0.713252343 | 0.90239554  |
| g Pseudoscherichia | g Candida                      | 0.053259234  | 0.150284489 | 0.547439059 |
| g Pseudoscherichia | g Cladosporium                 | -0.023865303 | 0.519423713 | 0.804175819 |
| g Pseudoscherichia | g Debaryomyces                 | 0.082133244  | 0.026378743 | 0.300667949 |
| g Pseudoscherichia | g Aspergillus                  | 0.015930709  | 0.667189125 | 0.879421986 |
| g Pseudoscherichia | g Kazachstania                 | 0.015510367  | 0.675463535 | 0.883717696 |

|                    |                                |              |             |             |
|--------------------|--------------------------------|--------------|-------------|-------------|
| g Pseudoscherichia | g Malassezia                   | -0.101609024 | 0.005966398 | 0.148686802 |
| g Pseudoscherichia | g unclassified Fungi           | -0.080970091 | 0.028594072 | 0.310978896 |
| g Pseudoscherichia | g Mycosphaerella               | 0.072512015  | 0.050026955 | 0.385192726 |
| g Pseudoscherichia | g Simplicillium                | -0.020043666 | 0.588474755 | 0.841860194 |
| g Pseudoscherichia | g unclassified Cordycipitaceae | -0.040814788 | 0.270426594 | 0.648313144 |
| g Pseudoscherichia | g unidentified                 | -0.045194982 | 0.222286835 | 0.608994242 |
| g Proteus          | g Verticillium                 | -0.032571292 | 0.37920792  | 0.722533174 |
| g Proteus          | g unclassified Tremellomycetes | -0.029676546 | 0.423034125 | 0.746980426 |
| g Proteus          | g Candida                      | 0.025334289  | 0.494037654 | 0.787335309 |
| g Proteus          | g Cladosporium                 | 0.015565975  | 0.674366611 | 0.883307496 |
| g Proteus          | g Debaryomyces                 | 0.04281602   | 0.247613103 | 0.629733759 |
| g Proteus          | g Aspergillus                  | 0.035148992  | 0.342625373 | 0.695270538 |
| g Proteus          | g Kazachstania                 | -0.000421529 | 0.990922353 | 0.996574895 |
| g Proteus          | g Malassezia                   | -0.027782089 | 0.453252306 | 0.765162867 |
| g Proteus          | g unclassified Fungi           | -0.041171284 | 0.26626074  | 0.644465474 |
| g Proteus          | g Mycosphaerella               | 0.034133869  | 0.356754462 | 0.707491701 |
| g Proteus          | g Simplicillium                | -0.039830856 | 0.282154876 | 0.657094722 |
| g Proteus          | g unclassified Cordycipitaceae | -0.007652341 | 0.836364923 | 0.943389613 |
| g Proteus          | g unidentified                 | 0.009162508  | 0.804669808 | 0.931596653 |
| g Atlantibacter    | g Verticillium                 | -0.064889872 | 0.079554999 | 0.45101344  |
| g Atlantibacter    | g unclassified Tremellomycetes | 0.008055684  | 0.827871371 | 0.939989934 |
| g Atlantibacter    | g Candida                      | 0.050639724  | 0.171411855 | 0.565255978 |
| g Atlantibacter    | g Cladosporium                 | -0.023815923 | 0.520288574 | 0.804338012 |
| g Atlantibacter    | g Debaryomyces                 | 0.06315143   | 0.087969494 | 0.465539911 |
| g Atlantibacter    | g Aspergillus                  | 0.032118122  | 0.385878628 | 0.725883489 |
| g Atlantibacter    | g Kazachstania                 | 0.000478648  | 0.989692355 | 0.996055991 |
| g Atlantibacter    | g Malassezia                   | -0.065104283 | 0.078564018 | 0.450732872 |
| g Atlantibacter    | g unclassified Fungi           | -0.074879285 | 0.042981533 | 0.361550541 |
| g Atlantibacter    | g Mycosphaerella               | 0.052007067  | 0.1601224   | 0.557138085 |
| g Atlantibacter    | g Simplicillium                | -0.015561293 | 0.674458946 | 0.883307496 |
| g Atlantibacter    | g unclassified Cordycipitaceae | -0.064622418 | 0.080805329 | 0.432126167 |
| g Atlantibacter    | g unidentified                 | -0.01989187  | 0.591302527 | 0.842715602 |
| g RIT-PI-d         | g Verticillium                 | -0.07859865  | 0.033609672 | 0.327713401 |
| g RIT-PI-d         | g unclassified Tremellomycetes | 0.012253272  | 0.740842903 | 0.90933095  |
| g RIT-PI-d         | g Candida                      | 0.041242138  | 0.265438061 | 0.643202556 |
| g RIT-PI-d         | g Cladosporium                 | -0.012848641 | 0.728735058 | 0.907012052 |
| g RIT-PI-d         | g Debaryomyces                 | 0.064084464  | 0.083368451 | 0.455684376 |
| g RIT-PI-d         | g Aspergillus                  | 0.035617578  | 0.336225436 | 0.691398671 |
| g RIT-PI-d         | g Kazachstania                 | 0.026873381  | 0.468167717 | 0.773111449 |
| g RIT-PI-d         | g Malassezia                   | -0.081186226 | 0.028170724 | 0.307552108 |
| g RIT-PI-d         | g unclassified Fungi           | -0.087934705 | 0.017405366 | 0.257239636 |
| g RIT-PI-d         | g Mycosphaerella               | 0.06568784   | 0.075917573 | 0.446374478 |
| g RIT-PI-d         | g Simplicillium                | -0.046872525 | 0.205577521 | 0.595120938 |
| g RIT-PI-d         | g unclassified Cordycipitaceae | -0.070376303 | 0.057188513 | 0.406699491 |
| g RIT-PI-d         | g unidentified                 | -0.019407213 | 0.600372843 | 0.847052968 |
| g Pluralibacter    | g Verticillium                 | -0.029958369 | 0.418641607 | 0.744941528 |
| g Pluralibacter    | g unclassified Tremellomycetes | 0.034156322  | 0.356438047 | 0.707261843 |
| g Pluralibacter    | g Candida                      | 0.040264584  | 0.276943161 | 0.654270214 |
| g Pluralibacter    | g Cladosporium                 | -0.020791802 | 0.574629269 | 0.834736537 |
| g Pluralibacter    | g Debaryomyces                 | 0.058171849  | 0.116082277 | 0.499342544 |
| g Pluralibacter    | g Aspergillus                  | 0.038575352  | 0.297613368 | 0.666037764 |
| g Pluralibacter    | g Kazachstania                 | 0.00988027   | 0.789713753 | 0.926124865 |
| g Pluralibacter    | g Malassezia                   | -0.060299112 | 0.10331296  | 0.483295494 |
| g Pluralibacter    | g unclassified Fungi           | -0.031847916 | 0.389889917 | 0.729587108 |
| g Pluralibacter    | g Mycosphaerella               | 0.048845683  | 0.187112707 | 0.577661122 |
| g Pluralibacter    | g Simplicillium                | -0.012392908 | 0.737997295 | 0.907794719 |
| g Pluralibacter    | g unclassified Cordycipitaceae | -0.057877225 | 0.117944436 | 0.502487018 |
| g Pluralibacter    | g unidentified                 | -0.026979888 | 0.466405615 | 0.772137706 |
| g Succinivibrio    | g Verticillium                 | 0.061682699  | 0.095624041 | 0.475737472 |
| g Succinivibrio    | g unclassified Tremellomycetes | -0.008257716 | 0.823624486 | 0.939079227 |
| g Succinivibrio    | g Candida                      | -0.015990883 | 0.666007871 | 0.879421986 |
| g Succinivibrio    | g Cladosporium                 | 0.043819921  | 0.236690032 | 0.620885948 |
| g Succinivibrio    | g Debaryomyces                 | 0.028643561  | 0.439362817 | 0.758246834 |
| g Succinivibrio    | g Aspergillus                  | -0.021992761 | 0.552731018 | 0.820336555 |
| g Succinivibrio    | g Kazachstania                 | 0.009449069  | 0.798689829 | 0.929569806 |
| g Succinivibrio    | g Malassezia                   | 0.080151629  | 0.030247132 | 0.315608804 |
| g Succinivibrio    | g unclassified Fungi           | -0.024029968 | 0.51654502  | 0.802865612 |
| g Succinivibrio    | g Mycosphaerella               | 0.059152863  | 0.110047621 | 0.492815881 |
| g Succinivibrio    | g Simplicillium                | 0.085188699  | 0.021251021 | 0.278255687 |
| g Succinivibrio    | g unclassified Cordycipitaceae | 0.080066619  | 0.030423435 | 0.315608804 |
| g Succinivibrio    | g unidentified                 | 0.019957312  | 0.590082615 | 0.842338356 |
| g Ruminobacter_A   | g Verticillium                 | -0.002091044 | 0.95499218  | 0.983420654 |
| g Ruminobacter_A   | g unclassified Tremellomycetes | -0.061221142 | 0.09813651  | 0.477873659 |
| g Ruminobacter_A   | g Candida                      | -0.038054564 | 0.30418832  | 0.670057703 |
| g Ruminobacter_A   | g Cladosporium                 | -0.004122498 | 0.911402443 | 0.969974923 |
| g Ruminobacter_A   | g Debaryomyces                 | -0.03779772  | 0.307466164 | 0.670833121 |
| g Ruminobacter_A   | g Aspergillus                  | -0.01700512  | 0.64622411  | 0.868120757 |
| g Ruminobacter_A   | g Kazachstania                 | -0.005979448 | 0.871785306 | 0.956423148 |

|                  |                                |              |             |             |
|------------------|--------------------------------|--------------|-------------|-------------|
| g Ruminobacter A | g Malassezia                   | 0.03748033   | 0.311548799 | 0.672399691 |
| g Ruminobacter A | g unclassified Fungi           | -0.026689001 | 0.471226864 | 0.77381206  |
| g Ruminobacter A | g Mycosphaerella               | 0.01065519   | 0.773653217 | 0.918520503 |
| g Ruminobacter A | g Simplicillium                | -0.026066481 | 0.481636292 | 0.780189053 |
| g Ruminobacter A | g unclassified Cordycipitaceae | 0.020487407  | 0.580243979 | 0.837330123 |
| g Ruminobacter A | g unidentified                 | 0.077174679  | 0.036968313 | 0.340172772 |
| g Haemophilus D  | g Verticillium                 | -0.076097029 | 0.039695997 | 0.350298383 |
| g Haemophilus D  | g unclassified Tremellomycetes | -0.067468287 | 0.068288729 | 0.435582476 |
| g Haemophilus D  | g Candida                      | -0.004764973 | 0.897665561 | 0.965250198 |
| g Haemophilus D  | g Cladosporium                 | -0.051081488 | 0.167701202 | 0.563342385 |
| g Haemophilus D  | g Debaryomyces                 | 0.060207004  | 0.103841753 | 0.483414571 |
| g Haemophilus D  | g Aspergillus                  | 0.003238316  | 0.930349771 | 0.975521331 |
| g Haemophilus D  | g Kazachstania                 | -0.079629703 | 0.031343522 | 0.319842959 |
| g Haemophilus D  | g Malassezia                   | -0.05091142  | 0.169122519 | 0.563848296 |
| g Haemophilus D  | g unclassified Fungi           | 0.050393144  | 0.173509527 | 0.568093383 |
| g Haemophilus D  | g Mycosphaerella               | -0.035509436 | 0.337695579 | 0.692361927 |
| g Haemophilus D  | g Simplicillium                | 0.019278704  | 0.602788372 | 0.848214003 |
| g Haemophilus D  | g unclassified Cordycipitaceae | -0.065000582 | 0.079042053 | 0.45101344  |
| g Haemophilus D  | g unidentified                 | 0.036499106  | 0.32439506  | 0.680794164 |
| g Vibrio         | g Verticillium                 | -0.078354523 | 0.034166267 | 0.329578334 |
| g Vibrio         | g unclassified Tremellomycetes | -0.075082933 | 0.042416618 | 0.358790655 |
| g Vibrio         | g Candida                      | 0.035329985  | 0.340144224 | 0.694699556 |
| g Vibrio         | g Cladosporium                 | -0.083794383 | 0.023472311 | 0.285827384 |
| g Vibrio         | g Debaryomyces                 | 0.065410425  | 0.077166462 | 0.448667857 |
| g Vibrio         | g Aspergillus                  | 0.046517856  | 0.209032022 | 0.598168571 |
| g Vibrio         | g Kazachstania                 | -0.006655474 | 0.857436626 | 0.952061861 |
| g Vibrio         | g Malassezia                   | -0.078017083 | 0.034948535 | 0.333329108 |
| g Vibrio         | g unclassified Fungi           | -0.07093095  | 0.055251415 | 0.400940701 |
| g Vibrio         | g Mycosphaerella               | 0.01240993   | 0.737650644 | 0.907794719 |
| g Vibrio         | g Simplicillium                | -0.043951618 | 0.235282702 | 0.619373537 |
| g Vibrio         | g unclassified Cordycipitaceae | -0.080410237 | 0.029716178 | 0.31335365  |
| g Vibrio         | g unidentified                 | 0.039545629  | 0.285618145 | 0.658908047 |
| g Aeromonas      | g Verticillium                 | -0.064770707 | 0.080110138 | 0.45101344  |
| g Aeromonas      | g unclassified Tremellomycetes | 0.04024657   | 0.277158309 | 0.654270214 |
| g Aeromonas      | g Candida                      | 0.043923123  | 0.235586703 | 0.619373537 |
| g Aeromonas      | g Cladosporium                 | -0.040149272 | 0.278323227 | 0.655510097 |
| g Aeromonas      | g Debaryomyces                 | 0.036675455  | 0.32206126  | 0.679081423 |
| g Aeromonas      | g Aspergillus                  | -0.008008413 | 0.828865783 | 0.940394309 |
| g Aeromonas      | g Kazachstania                 | -0.01541734  | 0.677300115 | 0.884796861 |
| g Aeromonas      | g Malassezia                   | -0.059618501 | 0.107271209 | 0.488444035 |
| g Aeromonas      | g unclassified Fungi           | -0.02477461  | 0.503630871 | 0.794724407 |
| g Aeromonas      | g Mycosphaerella               | 0.026754059  | 0.470146201 | 0.77348991  |
| g Aeromonas      | g Simplicillium                | -0.009553667 | 0.796509979 | 0.929086044 |
| g Aeromonas      | g unclassified Cordycipitaceae | -0.081556849 | 0.027457321 | 0.305524053 |
| g Aeromonas      | g unidentified                 | 0.00939347   | 0.799849171 | 0.929905946 |
| g Sutterella     | g Verticillium                 | -0.067899148 | 0.066540338 | 0.429871706 |
| g Sutterella     | g unclassified Tremellomycetes | -0.016364497 | 0.658692197 | 0.874996133 |
| g Sutterella     | g Candida                      | -0.004863368 | 0.895564349 | 0.96495896  |
| g Sutterella     | g Cladosporium                 | -0.064255612 | 0.082545974 | 0.455217912 |
| g Sutterella     | g Debaryomyces                 | -0.006412204 | 0.862594893 | 0.953015155 |
| g Sutterella     | g Aspergillus                  | 0.036296655  | 0.327087794 | 0.682858146 |
| g Sutterella     | g Kazachstania                 | -0.06470942  | 0.080396866 | 0.45101344  |
| g Sutterella     | g Malassezia                   | -0.015177892 | 0.682036172 | 0.887198957 |
| g Sutterella     | g unclassified Fungi           | -0.038934703 | 0.293132231 | 0.662256281 |
| g Sutterella     | g Mycosphaerella               | 0.007184849  | 0.846233111 | 0.947820248 |
| g Sutterella     | g Simplicillium                | -0.008375952 | 0.821141441 | 0.937561364 |
| g Sutterella     | g unclassified Cordycipitaceae | -0.062600286 | 0.090781957 | 0.469307225 |
| g Sutterella     | g unidentified                 | 0.054619589  | 0.140125274 | 0.533896229 |
| g Oxalobacter    | g Verticillium                 | 0.025167913  | 0.496879211 | 0.789367333 |
| g Oxalobacter    | g unclassified Tremellomycetes | -0.079464995 | 0.031696505 | 0.321892912 |
| g Oxalobacter    | g Candida                      | -0.003589369 | 0.922821652 | 0.973803223 |
| g Oxalobacter    | g Cladosporium                 | -0.023910838 | 0.518626829 | 0.80396368  |
| g Oxalobacter    | g Debaryomyces                 | -0.077269472 | 0.036736189 | 0.34011037  |
| g Oxalobacter    | g Aspergillus                  | 0.075974667  | 0.040016223 | 0.350685903 |
| g Oxalobacter    | g Kazachstania                 | -0.093236026 | 0.011668803 | 0.210607978 |
| g Oxalobacter    | g Malassezia                   | 0.038921371  | 0.293297674 | 0.662256281 |
| g Oxalobacter    | g unclassified Fungi           | 0.000847625  | 0.981747574 | 0.993008299 |
| g Oxalobacter    | g Mycosphaerella               | -0.000379279 | 0.991832175 | 0.996824777 |
| g Oxalobacter    | g Simplicillium                | -0.017664252 | 0.633498504 | 0.861635763 |
| g Oxalobacter    | g unclassified Cordycipitaceae | 0.018865503  | 0.610584534 | 0.851291399 |
| g Oxalobacter    | g unidentified                 | 0.092188019  | 0.01264782  | 0.219768851 |
| g Parasutterella | g Verticillium                 | 0.060031155  | 0.10485727  | 0.48522153  |
| g Parasutterella | g unclassified Tremellomycetes | -0.022456412 | 0.544387482 | 0.816215242 |
| g Parasutterella | g Candida                      | -0.038259636 | 0.301587888 | 0.667950463 |
| g Parasutterella | g Cladosporium                 | 0.03432779   | 0.35402743  | 0.705388488 |
| g Parasutterella | g Debaryomyces                 | -0.045977572 | 0.214374784 | 0.601936086 |
| g Parasutterella | g Aspergillus                  | -0.030299871 | 0.413354994 | 0.742811081 |
| g Parasutterella | g Kazachstania                 | -0.027909    | 0.451190723 | 0.764111513 |

|                   |                                |              |             |             |
|-------------------|--------------------------------|--------------|-------------|-------------|
| g Parasutterella  | g Malassezia                   | 0.02056826   | 0.578750108 | 0.836772676 |
| g Parasutterella  | g unclassified Fungi           | 0.028109259  | 0.44794844  | 0.762502994 |
| g Parasutterella  | g Mycosphaerella               | 0.015405372  | 0.677536524 | 0.884796861 |
| g Parasutterella  | g Simplicillium                | 0.020727934  | 0.575805214 | 0.835825895 |
| g Parasutterella  | g unclassified Cordycipitaceae | 0.058756914  | 0.112452812 | 0.495410348 |
| g Parasutterella  | g unidentified                 | -0.019436742 | 0.599818416 | 0.846981383 |
| g Turicimonas     | g Verticillium                 | 0.06357106   | 0.085875509 | 0.461520889 |
| g Turicimonas     | g unclassified Tremellomycetes | -0.018719471 | 0.613350457 | 0.852887587 |
| g Turicimonas     | g Candida                      | -0.044061548 | 0.234112516 | 0.618418319 |
| g Turicimonas     | g Cladosporium                 | 0.048348682  | 0.191644223 | 0.581082855 |
| g Turicimonas     | g Debaryomyces                 | -0.047567612 | 0.198927768 | 0.586587163 |
| g Turicimonas     | g Aspergillus                  | -0.031533689 | 0.394586401 | 0.730981467 |
| g Turicimonas     | g Kazachstania                 | -0.035064274 | 0.343790687 | 0.695739224 |
| g Turicimonas     | g Malassezia                   | 0.019883169  | 0.591464797 | 0.842833354 |
| g Turicimonas     | g unclassified Fungi           | 0.001531434  | 0.967029176 | 0.988470889 |
| g Turicimonas     | g Mycosphaerella               | 0.029952468  | 0.418733303 | 0.744941528 |
| g Turicimonas     | g Simplicillium                | 0.033749404  | 0.362199988 | 0.712813887 |
| g Turicimonas     | g unclassified Cordycipitaceae | 0.076499744  | 0.038657353 | 0.345208531 |
| g Turicimonas     | g unidentified                 | -0.013781431 | 0.709901249 | 0.902091837 |
| g Duodenibacillus | g Verticillium                 | -0.006826209 | 0.85382001  | 0.949865785 |
| g Duodenibacillus | g unclassified Tremellomycetes | -0.055372696 | 0.134732417 | 0.52396281  |
| g Duodenibacillus | g Candida                      | -0.025640174 | 0.488836147 | 0.783941094 |
| g Duodenibacillus | g Cladosporium                 | -0.061181579 | 0.098354299 | 0.477955684 |
| g Duodenibacillus | g Debaryomyces                 | -0.017461885 | 0.637394253 | 0.863812758 |
| g Duodenibacillus | g Aspergillus                  | 0.043224168  | 0.243130454 | 0.627053943 |
| g Duodenibacillus | g Kazachstania                 | -0.022780176 | 0.538598528 | 0.814978906 |
| g Duodenibacillus | g Malassezia                   | -0.000858895 | 0.98150493  | 0.993008299 |
| g Duodenibacillus | g unclassified Fungi           | -0.007470779 | 0.840194502 | 0.945241146 |
| g Duodenibacillus | g Mycosphaerella               | 0.000123172  | 0.997347427 | 0.998643711 |
| g Duodenibacillus | g Simplicillium                | 0.023820957  | 0.520200375 | 0.804338012 |
| g Duodenibacillus | g unclassified Cordycipitaceae | 0.001783011  | 0.961616765 | 0.986029904 |
| g Duodenibacillus | g unidentified                 | 0.033668776  | 0.363348549 | 0.713515619 |
| g Dakarella       | g Verticillium                 | -0.030333997 | 0.412828896 | 0.742811081 |
| g Dakarella       | g unclassified Tremellomycetes | 0.033211345  | 0.36990773  | 0.71692327  |
| g Dakarella       | g Candida                      | 0.037172267  | 0.315545439 | 0.675194937 |
| g Dakarella       | g Cladosporium                 | 0.00617793   | 0.867567933 | 0.955229514 |
| g Dakarella       | g Debaryomyces                 | -0.079000826 | 0.032709617 | 0.325586982 |
| g Dakarella       | g Aspergillus                  | -0.038557309 | 0.297839564 | 0.666157944 |
| g Dakarella       | g Kazachstania                 | -0.035113035 | 0.343119671 | 0.695270538 |
| g Dakarella       | g Malassezia                   | 0.00848195   | 0.818916923 | 0.936638444 |
| g Dakarella       | g unclassified Fungi           | 0.009844468  | 0.790457997 | 0.926417823 |
| g Dakarella       | g Mycosphaerella               | -0.028992696 | 0.433803928 | 0.75439822  |
| g Dakarella       | g Simplicillium                | -0.023549611 | 0.52496569  | 0.807399615 |
| g Dakarella       | g unclassified Cordycipitaceae | 0.024399876  | 0.510108457 | 0.798892628 |
| g Dakarella       | g unidentified                 | 0.019754323  | 0.593870315 | 0.8441015   |
| g CAG-521         | g Verticillium                 | -0.004661685 | 0.899872009 | 0.96604016  |
| g CAG-521         | g unclassified Tremellomycetes | -0.015388011 | 0.677879528 | 0.885048879 |
| g CAG-521         | g Candida                      | -0.06366403  | 0.085417061 | 0.460376939 |
| g CAG-521         | g Cladosporium                 | 0.019383651  | 0.600815405 | 0.847052968 |
| g CAG-521         | g Debaryomyces                 | -0.108535586 | 0.003301881 | 0.112650934 |
| g CAG-521         | g Aspergillus                  | 0.05088537   | 0.169341017 | 0.563866155 |
| g CAG-521         | g Kazachstania                 | -0.017123509 | 0.643930661 | 0.867151216 |
| g CAG-521         | g Malassezia                   | 0.013834766  | 0.708829573 | 0.901395203 |
| g CAG-521         | g unclassified Fungi           | -0.04173618  | 0.25975028  | 0.638398936 |
| g CAG-521         | g Mycosphaerella               | 0.026807086  | 0.469266383 | 0.77312422  |
| g CAG-521         | g Simplicillium                | 0.051218515  | 0.166562543 | 0.562541523 |
| g CAG-521         | g unclassified Cordycipitaceae | -0.002364696 | 0.949109583 | 0.98205511  |
| g CAG-521         | g unidentified                 | 0.003410187  | 0.926663292 | 0.974172444 |
| g Dechloromonas   | g Verticillium                 | 0.066266432  | 0.073365758 | 0.443491766 |
| g Dechloromonas   | g unclassified Tremellomycetes | 0.021282924  | 0.565624765 | 0.829091609 |
| g Dechloromonas   | g Candida                      | -0.075205489 | 0.042079681 | 0.357947896 |
| g Dechloromonas   | g Cladosporium                 | 0.043392186  | 0.24130176  | 0.625233894 |
| g Dechloromonas   | g Debaryomyces                 | -0.025526216 | 0.490770537 | 0.785245012 |
| g Dechloromonas   | g Aspergillus                  | -0.001877432 | 0.959585824 | 0.984964676 |
| g Dechloromonas   | g Kazachstania                 | -0.050834704 | 0.169766604 | 0.564474357 |
| g Dechloromonas   | g Malassezia                   | 0.010321668  | 0.780554187 | 0.921452255 |
| g Dechloromonas   | g unclassified Fungi           | -0.019757044 | 0.593819464 | 0.8441015   |
| g Dechloromonas   | g Mycosphaerella               | 0.012569847  | 0.734396617 | 0.907315107 |
| g Dechloromonas   | g Simplicillium                | 0.00722675   | 0.845347615 | 0.947820248 |
| g Dechloromonas   | g unclassified Cordycipitaceae | 0.063249585  | 0.087476049 | 0.465488609 |
| g Dechloromonas   | g unidentified                 | 0.045334039  | 0.220865918 | 0.607375142 |
| g Neisseria       | g Verticillium                 | -0.014625267 | 0.693014177 | 0.893623606 |
| g Neisseria       | g unclassified Tremellomycetes | -0.058282961 | 0.115386015 | 0.498170056 |
| g Neisseria       | g Candida                      | -0.003158543 | 0.932061334 | 0.976058688 |
| g Neisseria       | g Cladosporium                 | -0.055439069 | 0.134264918 | 0.52297511  |
| g Neisseria       | g Debaryomyces                 | 0.048966037  | 0.186027326 | 0.577169451 |
| g Neisseria       | g Aspergillus                  | -0.032176599 | 0.385013849 | 0.725207645 |
| g Neisseria       | g Kazachstania                 | -0.055036814 | 0.137117487 | 0.529167488 |



|                           |                                |              |             |             |
|---------------------------|--------------------------------|--------------|-------------|-------------|
| g Neisseria               | g Malassezia                   | 0.004460286  | 0.904176562 | 0.967468011 |
| g Neisseria               | g unclassified Fungi           | -0.019443927 | 0.599683539 | 0.84692999  |
| g Neisseria               | g Mycosphaerella               | -0.019141652 | 0.605369266 | 0.849829871 |
| g Neisseria               | g Simplicillium                | -0.019150775 | 0.605197319 | 0.849782598 |
| g Neisseria               | g unclassified Cordycipitaceae | -0.060185767 | 0.10396398  | 0.483414571 |
| g Neisseria               | g unidentified                 | 0.066262138  | 0.073384434 | 0.443491766 |
| g Salinicola              | g Verticillium                 | 0.0601669    | 0.104072659 | 0.483661344 |
| g Salinicola              | g unclassified Tremellomycetes | -0.020599762 | 0.578168566 | 0.836641823 |
| g Salinicola              | g Candida                      | 0.013779614  | 0.709937763 | 0.902091837 |
| g Salinicola              | g Cladosporium                 | 0.041051463  | 0.267655977 | 0.644978472 |
| g Salinicola              | g Debaryomyces                 | -0.091189342 | 0.01364756  | 0.225653879 |
| g Salinicola              | g Aspergillus                  | 0.060237117  | 0.103668636 | 0.483414571 |
| g Salinicola              | g Kazachstania                 | -0.022969847 | 0.535221557 | 0.812584579 |
| g Salinicola              | g Malassezia                   | 0.049086856  | 0.184942434 | 0.576342405 |
| g Salinicola              | g unclassified Fungi           | 0.047302509  | 0.201445204 | 0.590022167 |
| g Salinicola              | g Mycosphaerella               | 0.035772683  | 0.334124047 | 0.689866302 |
| g Salinicola              | g Simplicillium                | -0.003873797 | 0.916727303 | 0.971437239 |
| g Salinicola              | g unclassified Cordycipitaceae | 0.086504876  | 0.019324203 | 0.268956611 |
| g Salinicola              | g unidentified                 | 0.019602342  | 0.596713468 | 0.845643755 |
| g CAG-495                 | g Verticillium                 | 0.010697082  | 0.772787658 | 0.918101184 |
| g CAG-495                 | g unclassified Tremellomycetes | -0.003056354 | 0.934254324 | 0.976739727 |
| g CAG-495                 | g Candida                      | -0.028874424 | 0.435682493 | 0.755552629 |
| g CAG-495                 | g Cladosporium                 | 0.016855471  | 0.649127951 | 0.8699978   |
| g CAG-495                 | g Debaryomyces                 | -0.070783931 | 0.055759483 | 0.401939271 |
| g CAG-495                 | g Aspergillus                  | 0.040386498  | 0.275490097 | 0.653142958 |
| g CAG-495                 | g Kazachstania                 | -0.025139369 | 0.497367592 | 0.789550533 |
| g CAG-495                 | g Malassezia                   | 0.057435276  | 0.120781516 | 0.505177927 |
| g CAG-495                 | g unclassified Fungi           | -0.003101949 | 0.93327579  | 0.976431995 |
| g CAG-495                 | g Mycosphaerella               | -0.018734973 | 0.613056586 | 0.852887587 |
| g CAG-495                 | g Simplicillium                | 0.013927429  | 0.706969034 | 0.900366628 |
| g CAG-495                 | g unclassified Cordycipitaceae | 0.047889593  | 0.195901174 | 0.585259221 |
| g CAG-495                 | g unidentified                 | 0.012028742  | 0.745425984 | 0.909574751 |
| g 51-20                   | g Verticillium                 | 0.023715058  | 0.522057503 | 0.805467412 |
| g 51-20                   | g unclassified Tremellomycetes | -0.049495891 | 0.181304184 | 0.575010893 |
| g 51-20                   | g Candida                      | -0.097699773 | 0.008209848 | 0.17410143  |
| g 51-20                   | g Cladosporium                 | 0.023120986  | 0.532538268 | 0.811490628 |
| g 51-20                   | g Debaryomyces                 | -0.130450777 | 0.000406105 | 0.035930399 |
| g 51-20                   | g Aspergillus                  | 0.02029678   | 0.583773214 | 0.839104641 |
| g 51-20                   | g Kazachstania                 | -0.08523525  | 0.021180125 | 0.278255687 |
| g 51-20                   | g Malassezia                   | 0.022209103  | 0.548830101 | 0.817643267 |
| g 51-20                   | g unclassified Fungi           | 0.03154149   | 0.39446939  | 0.730918418 |
| g 51-20                   | g Mycosphaerella               | 0.026944792  | 0.466985853 | 0.772326375 |
| g 51-20                   | g Simplicillium                | 0.045321963  | 0.220989056 | 0.607375142 |
| g 51-20                   | g unclassified Cordycipitaceae | 0.039726754  | 0.283415585 | 0.658002559 |
| g 51-20                   | g unidentified                 | 0.073215829  | 0.047837863 | 0.377704921 |
| g Phascolarctobacterium A | g Verticillium                 | -0.037367364 | 0.313010468 | 0.672953429 |
| g Phascolarctobacterium A | g unclassified Tremellomycetes | -0.089364212 | 0.015655748 | 0.245072665 |
| g Phascolarctobacterium A | g Candida                      | -0.002620704 | 0.943608772 | 0.979558539 |
| g Phascolarctobacterium A | g Cladosporium                 | -0.068222046 | 0.06525431  | 0.424832637 |
| g Phascolarctobacterium A | g Debaryomyces                 | -0.032917404 | 0.374161092 | 0.718546866 |
| g Phascolarctobacterium A | g Aspergillus                  | -0.039837149 | 0.282078794 | 0.657094722 |
| g Phascolarctobacterium A | g Kazachstania                 | -0.04265026  | 0.249450019 | 0.631653529 |
| g Phascolarctobacterium A | g Malassezia                   | 0.019626142  | 0.596267833 | 0.84549554  |
| g Phascolarctobacterium A | g unclassified Fungi           | -0.019895484 | 0.591235115 | 0.842715602 |
| g Phascolarctobacterium A | g Mycosphaerella               | 0.020548819  | 0.579109157 | 0.836772676 |
| g Phascolarctobacterium A | g Simplicillium                | 0.065585782  | 0.076375099 | 0.446713721 |
| g Phascolarctobacterium A | g unclassified Cordycipitaceae | -0.044257893 | 0.23203271  | 0.617517742 |
| g Phascolarctobacterium A | g unidentified                 | 0.04105116   | 0.267659513 | 0.644978472 |
| g MGYG-HGUT-00927         | g Verticillium                 | -0.020495688 | 0.580090906 | 0.837223399 |
| g MGYG-HGUT-00927         | g unclassified Tremellomycetes | -0.037433849 | 0.312149674 | 0.672742944 |
| g MGYG-HGUT-00927         | g Candida                      | 0.006584283  | 0.858945536 | 0.952294782 |
| g MGYG-HGUT-00927         | g Cladosporium                 | -0.014064033 | 0.704229397 | 0.898499575 |
| g MGYG-HGUT-00927         | g Debaryomyces                 | 0.037492498  | 0.311391635 | 0.672399691 |
| g MGYG-HGUT-00927         | g Aspergillus                  | 0.004251571  | 0.908640445 | 0.9689845   |
| g MGYG-HGUT-00927         | g Kazachstania                 | -0.038259155 | 0.301593963 | 0.667950463 |
| g MGYG-HGUT-00927         | g Malassezia                   | -0.057227997 | 0.122130364 | 0.506577845 |
| g MGYG-HGUT-00927         | g unclassified Fungi           | -0.029039845 | 0.433056359 | 0.754104067 |
| g MGYG-HGUT-00927         | g Mycosphaerella               | 0.038997564  | 0.292353012 | 0.660929744 |
| g MGYG-HGUT-00927         | g Simplicillium                | 0.04238351   | 0.252426    | 0.633802908 |
| g MGYG-HGUT-00927         | g unclassified Cordycipitaceae | -0.024678516 | 0.505287786 | 0.795660555 |
| g MGYG-HGUT-00927         | g unidentified                 | 0.038043629  | 0.3043274   | 0.670057703 |
| g Acidaminococcus         | g Verticillium                 | 0.01423783   | 0.700749372 | 0.896871052 |
| g Acidaminococcus         | g unclassified Tremellomycetes | -0.014253633 | 0.700433261 | 0.896722014 |
| g Acidaminococcus         | g Candida                      | 0.026166582  | 0.479954076 | 0.780189053 |
| g Acidaminococcus         | g Cladosporium                 | 0.027500113  | 0.457851766 | 0.767141961 |
| g Acidaminococcus         | g Debaryomyces                 | -0.039531177 | 0.285794379 | 0.658995314 |
| g Acidaminococcus         | g Aspergillus                  | 0.005734636  | 0.876992112 | 0.957972871 |
| g Acidaminococcus         | g Kazachstania                 | -0.012189512 | 0.742143434 | 0.909480234 |

|                         |                                |              |             |             |
|-------------------------|--------------------------------|--------------|-------------|-------------|
| g Acidaminococcus       | g Malassezia                   | 0.061058259  | 0.09903562  | 0.478099877 |
| g Acidaminococcus       | g unclassified Fungi           | 0.088729218  | 0.016412914 | 0.25019082  |
| g Acidaminococcus       | g Mycosphaerella               | 0.016395642  | 0.658083814 | 0.874757951 |
| g Acidaminococcus       | g Simplicillium                | 0.028482947  | 0.441933747 | 0.759179335 |
| g Acidaminococcus       | g unclassified Cordycipitaceae | 0.003868774  | 0.916834887 | 0.971437239 |
| g Acidaminococcus       | g unidentified                 | 0.034564527  | 0.350716147 | 0.702774112 |
| g Phascolarctobacterium | g Verticillium                 | 0.056943269  | 0.124002329 | 0.508632924 |
| g Phascolarctobacterium | g unclassified Tremellomycetes | -0.042059023 | 0.25607928  | 0.636409334 |
| g Phascolarctobacterium | g Candida                      | -0.039469264 | 0.286550224 | 0.659118154 |
| g Phascolarctobacterium | g Cladosporium                 | -0.023932437 | 0.518249067 | 0.803768376 |
| g Phascolarctobacterium | g Debaryomyces                 | -0.000283433 | 0.993896184 | 0.997274144 |
| g Phascolarctobacterium | g Aspergillus                  | 0.022568067  | 0.542387588 | 0.816215242 |
| g Phascolarctobacterium | g Kazachstania                 | -0.038891409 | 0.293669699 | 0.66246275  |
| g Phascolarctobacterium | g Malassezia                   | 0.01707723   | 0.644826777 | 0.867805793 |
| g Phascolarctobacterium | g unclassified Fungi           | -0.038690336 | 0.29617456  | 0.664712449 |
| g Phascolarctobacterium | g Mycosphaerella               | 0.028687367  | 0.438663111 | 0.757620775 |
| g Phascolarctobacterium | g Simplicillium                | -0.024953531 | 0.500553425 | 0.792112508 |
| g Phascolarctobacterium | g unclassified Cordycipitaceae | 0.045379534  | 0.220402456 | 0.607083027 |
| g Phascolarctobacterium | g unidentified                 | 0.018810552  | 0.611624687 | 0.851846101 |
| g Succiniclasticum      | g Verticillium                 | 0.085278777  | 0.02111402  | 0.278255687 |
| g Succiniclasticum      | g unclassified Tremellomycetes | -0.026093151 | 0.481187791 | 0.780189053 |
| g Succiniclasticum      | g Candida                      | 0.035596224  | 0.336515419 | 0.691502927 |
| g Succiniclasticum      | g Cladosporium                 | 0.036877332  | 0.319403096 | 0.677138171 |
| g Succiniclasticum      | g Debaryomyces                 | -0.034740977 | 0.348260908 | 0.700111089 |
| g Succiniclasticum      | g Aspergillus                  | -0.009771976 | 0.791965489 | 0.926952638 |
| g Succiniclasticum      | g Kazachstania                 | -0.056182706 | 0.129112298 | 0.516899602 |
| g Succiniclasticum      | g Malassezia                   | 0.12263997   | 0.000891526 | 0.057282013 |
| g Succiniclasticum      | g unclassified Fungi           | 0.044147463  | 0.23320084  | 0.617638717 |
| g Succiniclasticum      | g Mycosphaerella               | 0.073578135  | 0.046742663 | 0.375288968 |
| g Succiniclasticum      | g Simplicillium                | 0.044450848  | 0.230001596 | 0.615081348 |
| g Succiniclasticum      | g unclassified Cordycipitaceae | 0.063020418  | 0.088631607 | 0.465955266 |
| g Succiniclasticum      | g unidentified                 | 0.024484002  | 0.508650485 | 0.798383435 |
| g MGYG-HGUT-00782       | g Verticillium                 | 0.031805341  | 0.390524255 | 0.729773041 |
| g MGYG-HGUT-00782       | g unclassified Tremellomycetes | -0.08043453  | 0.029666716 | 0.31335365  |
| g MGYG-HGUT-00782       | g Candida                      | 0.004902301  | 0.894733134 | 0.964849284 |
| g MGYG-HGUT-00782       | g Cladosporium                 | -0.024332652 | 0.511275059 | 0.799514213 |
| g MGYG-HGUT-00782       | g Debaryomyces                 | -0.051095743 | 0.167582471 | 0.563342385 |
| g MGYG-HGUT-00782       | g Aspergillus                  | 0.029973358  | 0.41840875  | 0.744941528 |
| g MGYG-HGUT-00782       | g Kazachstania                 | -0.074500841 | 0.044048189 | 0.365142621 |
| g MGYG-HGUT-00782       | g Malassezia                   | -0.000904117 | 0.980531314 | 0.993007151 |
| g MGYG-HGUT-00782       | g unclassified Fungi           | 0.033853094  | 0.360726236 | 0.711747526 |
| g MGYG-HGUT-00782       | g Mycosphaerella               | 0.035183047  | 0.342157645 | 0.695087772 |
| g MGYG-HGUT-00782       | g Simplicillium                | -0.015402013 | 0.677602888 | 0.884796861 |
| g MGYG-HGUT-00782       | g unclassified Cordycipitaceae | 0.039601077  | 0.284942655 | 0.658096791 |
| g MGYG-HGUT-00782       | g unidentified                 | 0.011158237  | 0.763278408 | 0.915034792 |
| g Veillonella           | g Verticillium                 | -0.069256774 | 0.061270362 | 0.415557779 |
| g Veillonella           | g unclassified Tremellomycetes | -0.065342222 | 0.07747605  | 0.449313418 |
| g Veillonella           | g Candida                      | 0.044964188  | 0.224659541 | 0.612060698 |
| g Veillonella           | g Cladosporium                 | 0.003098932  | 0.933340543 | 0.976431995 |
| g Veillonella           | g Debaryomyces                 | 0.017118503  | 0.644027566 | 0.867171358 |
| g Veillonella           | g Aspergillus                  | -0.008134872 | 0.826206169 | 0.939796584 |
| g Veillonella           | g Kazachstania                 | -0.00871536  | 0.814023628 | 0.934678606 |
| g Veillonella           | g Malassezia                   | -0.036846989 | 0.319801708 | 0.677234677 |
| g Veillonella           | g unclassified Fungi           | -0.012078503 | 0.744409489 | 0.909574751 |
| g Veillonella           | g Mycosphaerella               | 0.012543352  | 0.734935417 | 0.907315107 |
| g Veillonella           | g Simplicillium                | -0.013486229 | 0.715843166 | 0.903168431 |
| g Veillonella           | g unclassified Cordycipitaceae | -0.014389158 | 0.697724363 | 0.895302916 |
| g Veillonella           | g unidentified                 | -0.011626896 | 0.753650795 | 0.911378102 |
| g F0422                 | g Verticillium                 | -0.029161445 | 0.431131748 | 0.753212133 |
| g F0422                 | g unclassified Tremellomycetes | -0.004304818 | 0.907501342 | 0.968833132 |
| g F0422                 | g Candida                      | 0.026034125  | 0.482180723 | 0.780189053 |
| g F0422                 | g Cladosporium                 | -0.009525485 | 0.797097151 | 0.929238701 |
| g F0422                 | g Debaryomyces                 | 0.035212864  | 0.341748467 | 0.694699556 |
| g F0422                 | g Aspergillus                  | 0.022396201  | 0.545467464 | 0.816281885 |
| g F0422                 | g Kazachstania                 | 0.028964767  | 0.434247121 | 0.754622456 |
| g F0422                 | g Malassezia                   | -0.027788979 | 0.453140252 | 0.765162867 |
| g F0422                 | g unclassified Fungi           | -0.010877733 | 0.769058407 | 0.917136742 |
| g F0422                 | g Mycosphaerella               | -0.004172616 | 0.910329852 | 0.969320838 |
| g F0422                 | g Simplicillium                | 0.002889798  | 0.937829678 | 0.977568509 |
| g F0422                 | g unclassified Cordycipitaceae | -0.044195225 | 0.232695099 | 0.617638717 |
| g F0422                 | g unidentified                 | -0.029670441 | 0.423129572 | 0.746980426 |
| g Veillonella A         | g Verticillium                 | 0.039309102  | 0.288511753 | 0.659613931 |
| g Veillonella A         | g unclassified Tremellomycetes | -0.037066005 | 0.316931771 | 0.675911357 |
| g Veillonella A         | g Candida                      | -0.080243718 | 0.030057137 | 0.31505018  |
| g Veillonella A         | g Cladosporium                 | 0.036540629  | 0.323844557 | 0.680485128 |
| g Veillonella A         | g Debaryomyces                 | -0.036724372 | 0.321415838 | 0.67847037  |
| g Veillonella A         | g Aspergillus                  | 0.045877705  | 0.215373013 | 0.603186168 |
| g Veillonella A         | g Kazachstania                 | 0.011219382  | 0.7620202   | 0.914666261 |

|                 |                                |              |             |             |
|-----------------|--------------------------------|--------------|-------------|-------------|
| g Veillonella A | g Malassezia                   | 0.05920873   | 0.109711551 | 0.492584069 |
| g Veillonella A | g unclassified Fungi           | -0.019151167 | 0.605189919 | 0.849782598 |
| g Veillonella A | g Mycosphaerella               | 0.047286112  | 0.201601664 | 0.590137982 |
| g Veillonella A | g Simplicillium                | 0.012804086  | 0.729638878 | 0.907197641 |
| g Veillonella A | g unclassified Cordycipitaceae | 0.029493426  | 0.425902623 | 0.749530844 |
| g Veillonella A | g unidentified                 | 0.012052506  | 0.744940491 | 0.909574751 |
| g Allisonella   | g Verticillium                 | -0.006896052 | 0.852341425 | 0.949400054 |
| g Allisonella   | g unclassified Tremellomycetes | -0.046933489 | 0.204987919 | 0.594296482 |
| g Allisonella   | g Candida                      | 0.0337081    | 0.362788082 | 0.713429978 |
| g Allisonella   | g Cladosporium                 | 0.049610649  | 0.180293025 | 0.575003251 |
| g Allisonella   | g Debaryomyces                 | -0.051477798 | 0.164423865 | 0.561723687 |
| g Allisonella   | g Aspergillus                  | 0.02875382   | 0.437602887 | 0.756652573 |
| g Allisonella   | g Kazachstania                 | -0.040798279 | 0.270620596 | 0.64848037  |
| g Allisonella   | g Malassezia                   | -0.013639468 | 0.712756554 | 0.902091837 |
| g Allisonella   | g unclassified Fungi           | 0.080523132  | 0.029486913 | 0.313165257 |
| g Allisonella   | g Mycosphaerella               | 0.038129952  | 0.30323063  | 0.669054739 |
| g Allisonella   | g Simplicillium                | 0.007935165  | 0.830407194 | 0.940630371 |
| g Allisonella   | g unclassified Cordycipitaceae | -0.023094811 | 0.533002479 | 0.811490628 |
| g Allisonella   | g unidentified                 | 0.10472717   | 0.004590293 | 0.133080769 |
| g Dialister     | g Verticillium                 | 0.00723291   | 0.845217473 | 0.947820248 |
| g Dialister     | g unclassified Tremellomycetes | -0.033750751 | 0.362180822 | 0.712813887 |
| g Dialister     | g Candida                      | 0.01466205   | 0.692281435 | 0.89338075  |
| g Dialister     | g Cladosporium                 | 0.030870959  | 0.404602971 | 0.737438672 |
| g Dialister     | g Debaryomyces                 | -0.068296516 | 0.064960633 | 0.423806055 |
| g Dialister     | g Aspergillus                  | -0.005008983 | 0.892456097 | 0.963948577 |
| g Dialister     | g Kazachstania                 | -0.041406119 | 0.26354077  | 0.641845793 |
| g Dialister     | g Malassezia                   | 0.038748294  | 0.295451091 | 0.66421573  |
| g Dialister     | g unclassified Fungi           | 0.038436806  | 0.299353184 | 0.667036301 |
| g Dialister     | g Mycosphaerella               | -0.00098908  | 0.978702189 | 0.991924739 |
| g Dialister     | g Simplicillium                | 0.047750707  | 0.197202533 | 0.585839456 |
| g Dialister     | g unclassified Cordycipitaceae | 0.005753616  | 0.876588236 | 0.957913373 |
| g Dialister     | g unidentified                 | 0.020273865  | 0.584198122 | 0.839259371 |
| g UBA1822       | g Verticillium                 | 0.075275318  | 0.041888716 | 0.357109759 |
| g UBA1822       | g unclassified Tremellomycetes | 0.035889422  | 0.332548024 | 0.688353677 |
| g UBA1822       | g Candida                      | -0.021791826 | 0.556366242 | 0.82296164  |
| g UBA1822       | g Cladosporium                 | 0.08386516   | 0.023354894 | 0.2857127   |
| g UBA1822       | g Debaryomyces                 | -0.054069167 | 0.144170459 | 0.538704729 |
| g UBA1822       | g Aspergillus                  | 0.052592751  | 0.155462004 | 0.552672864 |
| g UBA1822       | g Kazachstania                 | -0.038684184 | 0.296251429 | 0.664728861 |
| g UBA1822       | g Malassezia                   | 0.074505356  | 0.044035331 | 0.365142621 |
| g UBA1822       | g unclassified Fungi           | 0.015015015  | 0.685264909 | 0.889048376 |
| g UBA1822       | g Mycosphaerella               | 0.058659667  | 0.113049825 | 0.496223213 |
| g UBA1822       | g Simplicillium                | -0.010696624 | 0.772797125 | 0.918101184 |
| g UBA1822       | g unclassified Cordycipitaceae | 0.10089596   | 0.006329076 | 0.150048656 |
| g UBA1822       | g unidentified                 | 0.006418106  | 0.86246967  | 0.953015155 |
| g Megasphaera   | g Verticillium                 | -0.035419498 | 0.338921393 | 0.693328103 |
| g Megasphaera   | g unclassified Tremellomycetes | 0.027406694  | 0.459381302 | 0.768514023 |
| g Megasphaera   | g Candida                      | 0.07725617   | 0.036768689 | 0.34011037  |
| g Megasphaera   | g Cladosporium                 | 0.025551438  | 0.490342051 | 0.785111149 |
| g Megasphaera   | g Debaryomyces                 | -0.049784703 | 0.178767394 | 0.574257008 |
| g Megasphaera   | g Aspergillus                  | 0.012862221  | 0.728459666 | 0.907012052 |
| g Megasphaera   | g Kazachstania                 | -0.04050098  | 0.274130338 | 0.651582937 |
| g Megasphaera   | g Malassezia                   | 0.019943027  | 0.590348793 | 0.842463713 |
| g Megasphaera   | g unclassified Fungi           | 0.037148006  | 0.315861599 | 0.675194937 |
| g Megasphaera   | g Mycosphaerella               | 0.03387967   | 0.360349116 | 0.711747526 |
| g Megasphaera   | g Simplicillium                | 0.030267564  | 0.413853432 | 0.742811081 |
| g Megasphaera   | g unclassified Cordycipitaceae | -0.033344216 | 0.367994955 | 0.71614358  |
| g Megasphaera   | g unidentified                 | 0.032782869  | 0.376117872 | 0.720164886 |
| g Caecibacter   | g Verticillium                 | -0.03489559  | 0.346118497 | 0.697400798 |
| g Caecibacter   | g unclassified Tremellomycetes | -0.005050268 | 0.891575156 | 0.963568245 |
| g Caecibacter   | g Candida                      | 0.059954731  | 0.105301056 | 0.485955417 |
| g Caecibacter   | g Cladosporium                 | 0.004419416  | 0.905050427 | 0.967495419 |
| g Caecibacter   | g Debaryomyces                 | -0.047507643 | 0.19949522  | 0.586932361 |
| g Caecibacter   | g Aspergillus                  | -0.026247076 | 0.478603683 | 0.780181171 |
| g Caecibacter   | g Kazachstania                 | -0.072512317 | 0.050025998 | 0.385192726 |
| g Caecibacter   | g Malassezia                   | 0.036351597  | 0.326355597 | 0.682374023 |
| g Caecibacter   | g unclassified Fungi           | 0.023542433  | 0.525092057 | 0.807399615 |
| g Caecibacter   | g Mycosphaerella               | 0.031930208  | 0.388665603 | 0.728326441 |
| g Caecibacter   | g Simplicillium                | 0.026230151  | 0.478887464 | 0.780189053 |
| g Caecibacter   | g unclassified Cordycipitaceae | -0.032343571 | 0.382551104 | 0.723530971 |
| g Caecibacter   | g unidentified                 | 0.032840691  | 0.375276089 | 0.719866895 |
| g Anaeroglobus  | g Verticillium                 | -0.034524318 | 0.351277167 | 0.703126667 |
| g Anaeroglobus  | g unclassified Tremellomycetes | -0.019214025 | 0.604005756 | 0.848929328 |
| g Anaeroglobus  | g Candida                      | 0.026916311  | 0.467457013 | 0.772669496 |
| g Anaeroglobus  | g Cladosporium                 | 0.000276937  | 0.994036078 | 0.997274144 |
| g Anaeroglobus  | g Debaryomyces                 | -0.019257075 | 0.603195337 | 0.848466444 |
| g Anaeroglobus  | g Aspergillus                  | -0.026816129 | 0.469116436 | 0.77312422  |
| g Anaeroglobus  | g Kazachstania                 | 0.043833541  | 0.236544207 | 0.620657277 |

|                   |                                |              |             |             |
|-------------------|--------------------------------|--------------|-------------|-------------|
| g Anaeroglobus    | g Malassezia                   | -0.004244642 | 0.908788686 | 0.969000455 |
| g Anaeroglobus    | g unclassified Fungi           | 0.056386867  | 0.127724845 | 0.51521926  |
| g Anaeroglobus    | g Mycosphaerella               | 0.007978994  | 0.829484783 | 0.940630371 |
| g Anaeroglobus    | g Simplicillium                | -0.012377632 | 0.738308412 | 0.907794719 |
| g Anaeroglobus    | g unclassified Cordycipitaceae | 0.001286159  | 0.97230747  | 0.990084454 |
| g Anaeroglobus    | g unidentified                 | 0.002704214  | 0.941814974 | 0.978613814 |
| g Megamonas       | g Verticillium                 | 0.01205384   | 0.744913236 | 0.909574751 |
| g Megamonas       | g unclassified Tremellomycetes | -0.007179865 | 0.846338454 | 0.947820248 |
| g Megamonas       | g Candida                      | 0.000753099  | 0.983782761 | 0.993484837 |
| g Megamonas       | g Cladosporium                 | 0.034623122  | 0.349899602 | 0.70218805  |
| g Megamonas       | g Debaryomyces                 | 0.04302236   | 0.245339729 | 0.628611967 |
| g Megamonas       | g Aspergillus                  | -0.040793208 | 0.270680192 | 0.64848037  |
| g Megamonas       | g Kazachstania                 | 0.006400809  | 0.862836655 | 0.953182742 |
| g Megamonas       | g Malassezia                   | -0.040404808 | 0.275272312 | 0.653130896 |
| g Megamonas       | g unclassified Fungi           | -0.027186244 | 0.463002024 | 0.769075712 |
| g Megamonas       | g Mycosphaerella               | 0.011506502  | 0.756120451 | 0.912137097 |
| g Megamonas       | g Simplicillium                | 0.01906613   | 0.606793569 | 0.850594775 |
| g Megamonas       | g unclassified Cordycipitaceae | 0.027505414  | 0.457765051 | 0.767141961 |
| g Megamonas       | g unidentified                 | -0.007628697 | 0.836863406 | 0.943700827 |
| g Selenomonas A   | g Verticillium                 | 0.093634043  | 0.011314945 | 0.206083895 |
| g Selenomonas A   | g unclassified Tremellomycetes | -0.097804147 | 0.008141298 | 0.173342477 |
| g Selenomonas A   | g Candida                      | -0.076850153 | 0.037772454 | 0.342509087 |
| g Selenomonas A   | g Cladosporium                 | 0.027203275  | 0.46272175  | 0.769075712 |
| g Selenomonas A   | g Debaryomyces                 | -0.123960842 | 0.000782936 | 0.051142179 |
| g Selenomonas A   | g Aspergillus                  | 0.036719872  | 0.321475188 | 0.67847037  |
| g Selenomonas A   | g Kazachstania                 | -0.092816858 | 0.012052025 | 0.21499378  |
| g Selenomonas A   | g Malassezia                   | 0.077311944  | 0.036632589 | 0.340070405 |
| g Selenomonas A   | g unclassified Fungi           | 0.019093447  | 0.606278214 | 0.85020356  |
| g Selenomonas A   | g Mycosphaerella               | -0.014900648 | 0.687535459 | 0.890646763 |
| g Selenomonas A   | g Simplicillium                | 0.01267047   | 0.732351553 | 0.907315107 |
| g Selenomonas A   | g unclassified Cordycipitaceae | 0.08613929   | 0.019843491 | 0.27129693  |
| g Selenomonas A   | g unidentified                 | 0.035768811  | 0.3341764   | 0.689866302 |
| g Anaerovibrio    | g Verticillium                 | 0.022572934  | 0.542300497 | 0.816215242 |
| g Anaerovibrio    | g unclassified Tremellomycetes | -0.073590272 | 0.04670634  | 0.375282075 |
| g Anaerovibrio    | g Candida                      | 0.028987141  | 0.433892055 | 0.754427494 |
| g Anaerovibrio    | g Cladosporium                 | -0.052992982 | 0.152336877 | 0.549189615 |
| g Anaerovibrio    | g Debaryomyces                 | -0.01076724  | 0.771338725 | 0.917834971 |
| g Anaerovibrio    | g Aspergillus                  | 0.096064174  | 0.009353499 | 0.186400616 |
| g Anaerovibrio    | g Kazachstania                 | 0.030036408  | 0.417430041 | 0.744489993 |
| g Anaerovibrio    | g Malassezia                   | 0.051577814  | 0.16360443  | 0.56154503  |
| g Anaerovibrio    | g unclassified Fungi           | 0.040994541  | 0.268320544 | 0.645398308 |
| g Anaerovibrio    | g Mycosphaerella               | 0.011525864  | 0.755723119 | 0.911989902 |
| g Anaerovibrio    | g Simplicillium                | 0.031517752  | 0.3948255   | 0.731058646 |
| g Anaerovibrio    | g unclassified Cordycipitaceae | -0.023352073 | 0.528448783 | 0.809385587 |
| g Anaerovibrio    | g unidentified                 | 0.026128344  | 0.4805963   | 0.780189053 |
| g Mitsuokella     | g Verticillium                 | 0.032817224  | 0.375617591 | 0.719866895 |
| g Mitsuokella     | g unclassified Tremellomycetes | -0.044925925 | 0.225054638 | 0.612060698 |
| g Mitsuokella     | g Candida                      | 0.01836165   | 0.620151008 | 0.856123107 |
| g Mitsuokella     | g Cladosporium                 | 0.027683718  | 0.454853931 | 0.765814499 |
| g Mitsuokella     | g Debaryomyces                 | -0.053299129 | 0.149978776 | 0.546890216 |
| g Mitsuokella     | g Aspergillus                  | -0.062628148 | 0.090638067 | 0.469307225 |
| g Mitsuokella     | g Kazachstania                 | -0.09805447  | 0.007978969 | 0.17196221  |
| g Mitsuokella     | g Malassezia                   | 0.087902845  | 0.017446235 | 0.257308974 |
| g Mitsuokella     | g unclassified Fungi           | 0.052727015  | 0.154408258 | 0.552146547 |
| g Mitsuokella     | g Mycosphaerella               | -0.009812147 | 0.791130017 | 0.926624392 |
| g Mitsuokella     | g Simplicillium                | 0.053660242  | 0.147233138 | 0.542108931 |
| g Mitsuokella     | g unclassified Cordycipitaceae | 0.023967449  | 0.517637001 | 0.803761519 |
| g Mitsuokella     | g unidentified                 | 0.040678835  | 0.272026975 | 0.649354715 |
| g Selenomonas C   | g Verticillium                 | 0.048349083  | 0.191640539 | 0.581082855 |
| g Selenomonas C   | g unclassified Tremellomycetes | -0.086513795 | 0.019311684 | 0.268956611 |
| g Selenomonas C   | g Candida                      | -0.026154457 | 0.480157669 | 0.780189053 |
| g Selenomonas C   | g Cladosporium                 | -0.010854434 | 0.769539071 | 0.917270973 |
| g Selenomonas C   | g Debaryomyces                 | -0.051918502 | 0.160836213 | 0.557764638 |
| g Selenomonas C   | g Aspergillus                  | 0.065329864  | 0.077532253 | 0.449313418 |
| g Selenomonas C   | g Kazachstania                 | -0.054353306 | 0.142071237 | 0.537119624 |
| g Selenomonas C   | g Malassezia                   | 0.036361287  | 0.326226578 | 0.682373918 |
| g Selenomonas C   | g unclassified Fungi           | 0.125268013  | 0.00068765  | 0.047912298 |
| g Selenomonas C   | g Mycosphaerella               | 0.005600148  | 0.879854766 | 0.959363538 |
| g Selenomonas C   | g Simplicillium                | 0.004673012  | 0.899630014 | 0.965995414 |
| g Selenomonas C   | g unclassified Cordycipitaceae | -0.016116319 | 0.663548158 | 0.878147399 |
| g Selenomonas C   | g unidentified                 | 0.080022002  | 0.030516319 | 0.315608804 |
| g MGYG-HGUT-03475 | g Verticillium                 | -0.034042106 | 0.358049497 | 0.70912966  |
| g MGYG-HGUT-03475 | g unclassified Tremellomycetes | -0.058842226 | 0.111931123 | 0.495063318 |
| g MGYG-HGUT-03475 | g Candida                      | 0.016182478  | 0.662252263 | 0.877059015 |
| g MGYG-HGUT-03475 | g Cladosporium                 | -0.042018162 | 0.256541909 | 0.63656207  |
| g MGYG-HGUT-03475 | g Debaryomyces                 | -0.002526145 | 0.945640253 | 0.980291673 |
| g MGYG-HGUT-03475 | g Aspergillus                  | 0.072126404  | 0.051261461 | 0.388295477 |
| g MGYG-HGUT-03475 | g Kazachstania                 | -0.029692391 | 0.422786456 | 0.746980426 |



|                   |                                |              |             |             |
|-------------------|--------------------------------|--------------|-------------|-------------|
| g MGYG-HGUT-03475 | g Malassezia                   | -0.033435419 | 0.366685568 | 0.715671969 |
| g MGYG-HGUT-03475 | g unclassified Fungi           | 0.030816423  | 0.405433936 | 0.737835308 |
| g MGYG-HGUT-03475 | g Mycosphaerella               | -0.008388535 | 0.820877288 | 0.937561364 |
| g MGYG-HGUT-03475 | g Simplicillium                | 0.02267072   | 0.540552171 | 0.815420595 |
| g MGYG-HGUT-03475 | g unclassified Cordycipitaceae | -0.06555964  | 0.076492654 | 0.446713721 |
| g MGYG-HGUT-03475 | g unidentified                 | 0.042683551  | 0.249080337 | 0.63134694  |
| g Bilophila       | g Verticillium                 | 0.032691802  | 0.377445982 | 0.721295105 |
| g Bilophila       | g unclassified Tremellomycetes | -0.03735275  | 0.313199889 | 0.673223893 |
| g Bilophila       | g Candida                      | -0.020283949 | 0.584011121 | 0.839104641 |
| g Bilophila       | g Cladosporium                 | 0.029926695  | 0.419133948 | 0.745299184 |
| g Bilophila       | g Debaryomyces                 | -0.061845506 | 0.094750168 | 0.474064434 |
| g Bilophila       | g Aspergillus                  | 0.058801641  | 0.112179064 | 0.495063318 |
| g Bilophila       | g Kazachstania                 | -0.054381528 | 0.141864021 | 0.537119624 |
| g Bilophila       | g Malassezia                   | 0.044682057  | 0.227584477 | 0.612967811 |
| g Bilophila       | g unclassified Fungi           | 0.042099073  | 0.255626405 | 0.635647844 |
| g Bilophila       | g Mycosphaerella               | 0.004987637  | 0.892911644 | 0.964063974 |
| g Bilophila       | g Simplicillium                | 0.005897382  | 0.873530123 | 0.95723287  |
| g Bilophila       | g unclassified Cordycipitaceae | 0.037460908  | 0.311799781 | 0.672399691 |
| g Bilophila       | g unidentified                 | 0.015803745  | 0.669684209 | 0.880856251 |
| g Desulfovibrio   | g Verticillium                 | 0.075513347  | 0.041243256 | 0.355263449 |
| g Desulfovibrio   | g unclassified Tremellomycetes | -0.065887036 | 0.075031003 | 0.444805645 |
| g Desulfovibrio   | g Candida                      | -0.022546168 | 0.542779536 | 0.816215242 |
| g Desulfovibrio   | g Cladosporium                 | 0.004447887  | 0.904441673 | 0.967483304 |
| g Desulfovibrio   | g Debaryomyces                 | -0.112193819 | 0.002383196 | 0.092534351 |
| g Desulfovibrio   | g Aspergillus                  | 0.044283106  | 0.231766594 | 0.61716312  |
| g Desulfovibrio   | g Kazachstania                 | -0.076545217 | 0.038541535 | 0.345047824 |
| g Desulfovibrio   | g Malassezia                   | 0.065260804  | 0.077846941 | 0.449905153 |
| g Desulfovibrio   | g unclassified Fungi           | 0.039299927  | 0.288624385 | 0.659613931 |
| g Desulfovibrio   | g Mycosphaerella               | 0.031261188  | 0.398686755 | 0.733977599 |
| g Desulfovibrio   | g Simplicillium                | 0.023302259  | 0.529328971 | 0.810147408 |
| g Desulfovibrio   | g unclassified Cordycipitaceae | 0.069815631  | 0.059203611 | 0.412336263 |
| g Desulfovibrio   | g unidentified                 | 0.08620424   | 0.019750356 | 0.270879604 |
| g Mailhella       | g Verticillium                 | 0.088325668  | 0.016910623 | 0.254457558 |
| g Mailhella       | g unclassified Tremellomycetes | -0.094058708 | 0.01094791  | 0.202776082 |
| g Mailhella       | g Candida                      | -0.036280974 | 0.327296968 | 0.682858146 |
| g Mailhella       | g Cladosporium                 | 0.016775943  | 0.650673308 | 0.870691065 |
| g Mailhella       | g Debaryomyces                 | -0.060915472 | 0.099829187 | 0.478320958 |
| g Mailhella       | g Aspergillus                  | -0.022689346 | 0.540219474 | 0.815420595 |
| g Mailhella       | g Kazachstania                 | -0.047396707 | 0.200554104 | 0.589026791 |
| g Mailhella       | g Malassezia                   | 0.117906963  | 0.001405388 | 0.072766386 |
| g Mailhella       | g unclassified Fungi           | 0.025149692  | 0.497190939 | 0.78950698  |
| g Mailhella       | g Mycosphaerella               | 0.044208281  | 0.232556994 | 0.617638717 |
| g Mailhella       | g Simplicillium                | 0.027909232  | 0.451186959 | 0.764111513 |
| g Mailhella       | g unclassified Cordycipitaceae | 0.05567411   | 0.132619455 | 0.52120331  |
| g Mailhella       | g unidentified                 | 0.041283016  | 0.264964212 | 0.64234852  |
| g Enterococcus B  | g Verticillium                 | -0.060362629 | 0.102949553 | 0.482467744 |
| g Enterococcus B  | g unclassified Tremellomycetes | 0.051526045  | 0.164028198 | 0.561723687 |
| g Enterococcus B  | g Candida                      | 0.038679696  | 0.296307507 | 0.664728861 |
| g Enterococcus B  | g Cladosporium                 | 0.088713609  | 0.016431924 | 0.25019082  |
| g Enterococcus B  | g Debaryomyces                 | 0.103704576  | 0.005006205 | 0.138753557 |
| g Enterococcus B  | g Aspergillus                  | 0.039361306  | 0.287871406 | 0.659362601 |
| g Enterococcus B  | g Kazachstania                 | -0.001426735 | 0.969282133 | 0.988740749 |
| g Enterococcus B  | g Malassezia                   | 0.037640024  | 0.309490197 | 0.672075778 |
| g Enterococcus B  | g unclassified Fungi           | -0.016753657 | 0.651106632 | 0.870940511 |
| g Enterococcus B  | g Mycosphaerella               | 0.042593607  | 0.250080015 | 0.631737101 |
| g Enterococcus B  | g Simplicillium                | -0.007126409 | 0.847468448 | 0.948182609 |
| g Enterococcus B  | g unclassified Cordycipitaceae | -0.010832996 | 0.769981426 | 0.917328419 |
| g Enterococcus B  | g unidentified                 | -0.019783923 | 0.593317298 | 0.84388221  |
| g Enterococcus A  | g Verticillium                 | 0.010387065  | 0.779199669 | 0.921314364 |
| g Enterococcus A  | g unclassified Tremellomycetes | -0.027175727 | 0.463175157 | 0.769075712 |
| g Enterococcus A  | g Candida                      | -0.025011916 | 0.499551361 | 0.791370491 |
| g Enterococcus A  | g Cladosporium                 | -0.005039756 | 0.891799453 | 0.963568245 |
| g Enterococcus A  | g Debaryomyces                 | 0.049160755  | 0.184281159 | 0.576259818 |
| g Enterococcus A  | g Aspergillus                  | -0.054832084 | 0.138587126 | 0.532315413 |
| g Enterococcus A  | g Kazachstania                 | 0.019312362  | 0.602155291 | 0.84782554  |
| g Enterococcus A  | g Malassezia                   | 0.007331374  | 0.843137484 | 0.946639878 |
| g Enterococcus A  | g unclassified Fungi           | -0.010840598 | 0.769824561 | 0.917270973 |
| g Enterococcus A  | g Mycosphaerella               | 0.028001027  | 0.449699131 | 0.763196957 |
| g Enterococcus A  | g Simplicillium                | -0.029300699 | 0.428933808 | 0.751274884 |
| g Enterococcus A  | g unclassified Cordycipitaceae | 0.031183153  | 0.399865656 | 0.734997111 |
| g Enterococcus A  | g unidentified                 | -0.031726268 | 0.391704054 | 0.730055982 |
| g Enterococcus D  | g Verticillium                 | -0.083910766 | 0.023279503 | 0.285641852 |
| g Enterococcus D  | g unclassified Tremellomycetes | 0.029830182  | 0.420636218 | 0.74604389  |
| g Enterococcus D  | g Candida                      | 0.011709941  | 0.751948743 | 0.910738423 |
| g Enterococcus D  | g Cladosporium                 | 0.025908863  | 0.484291554 | 0.781124079 |
| g Enterococcus D  | g Debaryomyces                 | 0.166182851  | 6.28E-06    | 0.008626179 |
| g Enterococcus D  | g Aspergillus                  | -0.032556631 | 0.379422611 | 0.722533174 |
| g Enterococcus D  | g Kazachstania                 | 0.031502941  | 0.395047785 | 0.73122191  |

|                   |                                |              |             |             |
|-------------------|--------------------------------|--------------|-------------|-------------|
| g Enterococcus D  | g Malassezia                   | -0.01663479  | 0.653419827 | 0.872421924 |
| g Enterococcus D  | g unclassified Fungi           | -0.033371916 | 0.367596954 | 0.716103178 |
| g Enterococcus D  | g Mycosphaerella               | 0.040442227  | 0.274827605 | 0.652653887 |
| g Enterococcus D  | g Simplicillium                | -0.027706502 | 0.454482694 | 0.765814499 |
| g Enterococcus D  | g unclassified Cordycipitaceae | -0.008297958 | 0.822779167 | 0.938379371 |
| g Enterococcus D  | g unidentified                 | -0.013425729 | 0.717063057 | 0.903293001 |
| g Enterococcus    | g Verticillium                 | -0.091232588 | 0.013602867 | 0.225653879 |
| g Enterococcus    | g unclassified Tremellomycetes | -0.001484961 | 0.968029176 | 0.988549475 |
| g Enterococcus    | g Candida                      | 0.039645104  | 0.284407057 | 0.658002559 |
| g Enterococcus    | g Cladosporium                 | -0.005181324 | 0.888779512 | 0.962647369 |
| g Enterococcus    | g Debaryomyces                 | 0.059246368  | 0.109485587 | 0.492584069 |
| g Enterococcus    | g Aspergillus                  | 0.014915183  | 0.687246727 | 0.890576153 |
| g Enterococcus    | g Kazachstania                 | 0.025652617  | 0.488625178 | 0.783941094 |
| g Enterococcus    | g Malassezia                   | -0.020213158 | 0.585324506 | 0.840014196 |
| g Enterococcus    | g unclassified Fungi           | -0.019218257 | 0.603926073 | 0.848929328 |
| g Enterococcus    | g Mycosphaerella               | 0.03154701   | 0.394386609 | 0.730893012 |
| g Enterococcus    | g Simplicillium                | 0.011944742  | 0.747142892 | 0.90996433  |
| g Enterococcus    | g unclassified Cordycipitaceae | -0.02242159  | 0.545011938 | 0.816215242 |
| g Enterococcus    | g unidentified                 | 0.025581426  | 0.489832852 | 0.784889649 |
| g Streptococcus   | g Verticillium                 | -0.065477445 | 0.076863225 | 0.448135895 |
| g Streptococcus   | g unclassified Tremellomycetes | -0.049694806 | 0.179554169 | 0.574257008 |
| g Streptococcus   | g Candida                      | 0.032550021  | 0.379519429 | 0.722533174 |
| g Streptococcus   | g Cladosporium                 | -0.013457464 | 0.716423074 | 0.903168431 |
| g Streptococcus   | g Debaryomyces                 | 0.005632045  | 0.879175668 | 0.959304186 |
| g Streptococcus   | g Aspergillus                  | 0.02820966   | 0.446327899 | 0.761832544 |
| g Streptococcus   | g Kazachstania                 | 0.005218112  | 0.887995017 | 0.96251366  |
| g Streptococcus   | g Malassezia                   | 0.016110394  | 0.663664255 | 0.878191215 |
| g Streptococcus   | g unclassified Fungi           | 0.071101909  | 0.054665463 | 0.399257624 |
| g Streptococcus   | g Mycosphaerella               | -0.039723967 | 0.283449393 | 0.658002559 |
| g Streptococcus   | g Simplicillium                | -0.012454693 | 0.736739313 | 0.907763268 |
| g Streptococcus   | g unclassified Cordycipitaceae | -0.06093815  | 0.099702812 | 0.478320958 |
| g Streptococcus   | g unidentified                 | 0.022308299  | 0.547046011 | 0.816368923 |
| g Lactococcus     | g Verticillium                 | -0.046182519 | 0.212336648 | 0.600680647 |
| g Lactococcus     | g unclassified Tremellomycetes | 0.000995669  | 0.978560342 | 0.991924739 |
| g Lactococcus     | g Candida                      | 0.035262467  | 0.341068444 | 0.694699556 |
| g Lactococcus     | g Cladosporium                 | -0.038912208 | 0.293411407 | 0.662256281 |
| g Lactococcus     | g Debaryomyces                 | -0.012877208 | 0.728155772 | 0.907012052 |
| g Lactococcus     | g Aspergillus                  | 0.021461094  | 0.562374903 | 0.827219568 |
| g Lactococcus     | g Kazachstania                 | 0.004202536  | 0.909689614 | 0.969239777 |
| g Lactococcus     | g Malassezia                   | -0.005998278 | 0.871385041 | 0.956423148 |
| g Lactococcus     | g unclassified Fungi           | -0.031625174 | 0.393215535 | 0.730757316 |
| g Lactococcus     | g Mycosphaerella               | -0.018054396 | 0.626016505 | 0.8579572   |
| g Lactococcus     | g Simplicillium                | -0.026185131 | 0.479642706 | 0.780189053 |
| g Lactococcus     | g unclassified Cordycipitaceae | -0.048440707 | 0.190799147 | 0.580402598 |
| g Lactococcus     | g unidentified                 | 0.053858877  | 0.145739296 | 0.540957635 |
| g Lactobacillus H | g Verticillium                 | -0.084626351 | 0.0221239   | 0.282747713 |
| g Lactobacillus H | g unclassified Tremellomycetes | -0.038793777 | 0.29488417  | 0.663646169 |
| g Lactobacillus H | g Candida                      | 0.06193195   | 0.094288779 | 0.473498111 |
| g Lactobacillus H | g Cladosporium                 | -0.02215013  | 0.5498921   | 0.818764346 |
| g Lactobacillus H | g Debaryomyces                 | -0.04604728  | 0.213679991 | 0.601212885 |
| g Lactobacillus H | g Aspergillus                  | 0.006761309  | 0.855194399 | 0.950427981 |
| g Lactobacillus H | g Kazachstania                 | 0.029457049  | 0.42647379  | 0.749727648 |
| g Lactobacillus H | g Malassezia                   | -0.03902975  | 0.291954579 | 0.660859538 |
| g Lactobacillus H | g unclassified Fungi           | 0.031822486  | 0.390268737 | 0.72965864  |
| g Lactobacillus H | g Mycosphaerella               | -0.056351343 | 0.12796543  | 0.51521926  |
| g Lactobacillus H | g Simplicillium                | 0.004265321  | 0.908346281 | 0.968963744 |
| g Lactobacillus H | g unclassified Cordycipitaceae | -0.047503292 | 0.199536437 | 0.586932361 |
| g Lactobacillus H | g unidentified                 | 0.024049644  | 0.516201578 | 0.802710521 |
| g Lactobacillus B | g Verticillium                 | -0.009751436 | 0.792392771 | 0.926965257 |
| g Lactobacillus B | g unclassified Tremellomycetes | -0.075867659 | 0.040298059 | 0.350685903 |
| g Lactobacillus B | g Candida                      | 0.009443758  | 0.798800545 | 0.929569806 |
| g Lactobacillus B | g Cladosporium                 | -0.048963487 | 0.186050278 | 0.577169451 |
| g Lactobacillus B | g Debaryomyces                 | -0.095451104 | 0.009817436 | 0.191675484 |
| g Lactobacillus B | g Aspergillus                  | -0.013240832 | 0.720795716 | 0.905336886 |
| g Lactobacillus B | g Kazachstania                 | -0.010970314 | 0.76714927  | 0.916616044 |
| g Lactobacillus B | g Malassezia                   | 0.052349425  | 0.157385559 | 0.55423489  |
| g Lactobacillus B | g unclassified Fungi           | 0.028299797  | 0.444875851 | 0.76170364  |
| g Lactobacillus B | g Mycosphaerella               | -0.009227345 | 0.803315761 | 0.931173993 |
| g Lactobacillus B | g Simplicillium                | -0.034100274 | 0.357228248 | 0.707900622 |
| g Lactobacillus B | g unclassified Cordycipitaceae | -0.033239115 | 0.369507455 | 0.71692327  |
| g Lactobacillus B | g unidentified                 | 0.082963374  | 0.024889654 | 0.293625772 |
| g Weissella       | g Verticillium                 | -0.004067626 | 0.912576946 | 0.970712814 |
| g Weissella       | g unclassified Tremellomycetes | 0.011025229  | 0.766017513 | 0.916246548 |
| g Weissella       | g Candida                      | 0.043602675  | 0.239024492 | 0.622994378 |
| g Weissella       | g Cladosporium                 | 0.050258337  | 0.174664409 | 0.569927454 |
| g Weissella       | g Debaryomyces                 | 0.002625386  | 0.943508182 | 0.979558539 |
| g Weissella       | g Aspergillus                  | 0.03362504   | 0.36397253  | 0.713515619 |
| g Weissella       | g Kazachstania                 | 0.035580159  | 0.336733674 | 0.691597784 |

|                   |                                |              |             |             |
|-------------------|--------------------------------|--------------|-------------|-------------|
| g Weissella       | g Malassezia                   | 0.044588161  | 0.228563905 | 0.613524642 |
| g Weissella       | g unclassified Fungi           | -0.036852693 | 0.31972676  | 0.677234677 |
| g Weissella       | g Mycosphaerella               | 0.015524131  | 0.675191957 | 0.883535895 |
| g Weissella       | g Simplicillium                | -0.047785077 | 0.196879903 | 0.58576073  |
| g Weissella       | g unclassified Cordycipitaceae | 0.037384301  | 0.312791034 | 0.672824117 |
| g Weissella       | g unidentified                 | -0.015912929 | 0.667538324 | 0.879421986 |
| g Lactobacillus   | g Verticillium                 | -0.052559989 | 0.15571995  | 0.552962589 |
| g Lactobacillus   | g unclassified Tremellomycetes | -0.082164327 | 0.026321633 | 0.300469812 |
| g Lactobacillus   | g Candida                      | -0.004065431 | 0.91262394  | 0.970712814 |
| g Lactobacillus   | g Cladosporium                 | -0.030088349 | 0.416624795 | 0.744290485 |
| g Lactobacillus   | g Debaryomyces                 | -0.061070759 | 0.098966387 | 0.478099877 |
| g Lactobacillus   | g Aspergillus                  | -0.026115409 | 0.48081364  | 0.780189053 |
| g Lactobacillus   | g Kazachstania                 | 0.029330184  | 0.42846926  | 0.751274884 |
| g Lactobacillus   | g Malassezia                   | -0.017051736 | 0.645320646 | 0.868076943 |
| g Lactobacillus   | g unclassified Fungi           | -0.01322692  | 0.721076824 | 0.905336886 |
| g Lactobacillus   | g Mycosphaerella               | 0.029011536  | 0.433505119 | 0.754250438 |
| g Lactobacillus   | g Simplicillium                | -0.014207736 | 0.701351519 | 0.897212331 |
| g Lactobacillus   | g unclassified Cordycipitaceae | -0.003301773 | 0.928988488 | 0.974673427 |
| g Lactobacillus   | g unidentified                 | 0.028261849  | 0.445486842 | 0.761797014 |
| g Lactobacillus G | g Verticillium                 | -0.099716997 | 0.006972321 | 0.159012386 |
| g Lactobacillus G | g unclassified Tremellomycetes | -0.02667866  | 0.471398775 | 0.773866248 |
| g Lactobacillus G | g Candida                      | 0.009061866  | 0.806772742 | 0.932627175 |
| g Lactobacillus G | g Cladosporium                 | -0.045318958 | 0.221019707 | 0.607375142 |
| g Lactobacillus G | g Debaryomyces                 | 0.017441968  | 0.637778216 | 0.863812758 |
| g Lactobacillus G | g Aspergillus                  | 0.037843349  | 0.306882153 | 0.670678839 |
| g Lactobacillus G | g Kazachstania                 | 0.085077219  | 0.021421643 | 0.278823892 |
| g Lactobacillus G | g Malassezia                   | -0.014388189 | 0.69774371  | 0.895302916 |
| g Lactobacillus G | g unclassified Fungi           | -0.096774542 | 0.008840424 | 0.180264028 |
| g Lactobacillus G | g Mycosphaerella               | -0.00216988  | 0.953297201 | 0.982873945 |
| g Lactobacillus G | g Simplicillium                | -0.028195114 | 0.44656247  | 0.761832544 |
| g Lactobacillus G | g unclassified Cordycipitaceae | -0.071106954 | 0.054648248 | 0.399257624 |
| g Lactobacillus G | g unidentified                 | 0.004610938  | 0.900956367 | 0.966260363 |
| g Leuconostoc     | g Verticillium                 | -0.056716565 | 0.125508726 | 0.511677022 |
| g Leuconostoc     | g unclassified Tremellomycetes | 0.057648197  | 0.119408088 | 0.502959311 |
| g Leuconostoc     | g Candida                      | 0.072740884  | 0.049306081 | 0.38223952  |
| g Leuconostoc     | g Cladosporium                 | -0.01409091  | 0.703690812 | 0.898194465 |
| g Leuconostoc     | g Debaryomyces                 | 0.106666466  | 0.003886277 | 0.122149653 |
| g Leuconostoc     | g Aspergillus                  | 0.065383027  | 0.077290706 | 0.448896952 |
| g Leuconostoc     | g Kazachstania                 | 0.047163282  | 0.202776553 | 0.592595696 |
| g Leuconostoc     | g Malassezia                   | 0.027940447  | 0.450680703 | 0.764099955 |
| g Leuconostoc     | g unclassified Fungi           | -0.065400267 | 0.077212505 | 0.448689033 |
| g Leuconostoc     | g Mycosphaerella               | 0.004572022  | 0.901788042 | 0.966636316 |
| g Leuconostoc     | g Simplicillium                | 0.036036292  | 0.330572042 | 0.686878237 |
| g Leuconostoc     | g unclassified Cordycipitaceae | -0.02749673  | 0.457907107 | 0.767141961 |
| g Leuconostoc     | g unidentified                 | -0.031128599 | 0.400691072 | 0.735790931 |
| g Granulicatella  | g Verticillium                 | -0.030362398 | 0.412391338 | 0.742542987 |
| g Granulicatella  | g unclassified Tremellomycetes | -0.017845776 | 0.630012609 | 0.860009472 |
| g Granulicatella  | g Candida                      | 0.01702687   | 0.645802521 | 0.868076943 |
| g Granulicatella  | g Cladosporium                 | -0.003624832 | 0.922061554 | 0.973680807 |
| g Granulicatella  | g Debaryomyces                 | 0.100805378  | 0.006376538 | 0.150281798 |
| g Granulicatella  | g Aspergillus                  | -0.01038369  | 0.779269548 | 0.921314364 |
| g Granulicatella  | g Kazachstania                 | 0.041111769  | 0.266953127 | 0.644840157 |
| g Granulicatella  | g Malassezia                   | 0.016853375  | 0.649168648 | 0.8699978   |
| g Granulicatella  | g unclassified Fungi           | 0.036015853  | 0.330846567 | 0.686878237 |
| g Granulicatella  | g Mycosphaerella               | -0.047702946 | 0.197651512 | 0.58591995  |
| g Granulicatella  | g Simplicillium                | -0.012591398 | 0.733958466 | 0.907315107 |
| g Granulicatella  | g unclassified Cordycipitaceae | -0.049060466 | 0.185179    | 0.576342405 |
| g Granulicatella  | g unidentified                 | -0.089373287 | 0.015645153 | 0.245072665 |
| g Absiella        | g Verticillium                 | -0.050537212 | 0.172281619 | 0.566309615 |
| g Absiella        | g unclassified Tremellomycetes | 0.039462818  | 0.286629001 | 0.659118154 |
| g Absiella        | g Candida                      | -0.019030066 | 0.607474247 | 0.851091285 |
| g Absiella        | g Cladosporium                 | 0.058248731  | 0.115600157 | 0.498339196 |
| g Absiella        | g Debaryomyces                 | 0.021345032  | 0.564490882 | 0.828788917 |
| g Absiella        | g Aspergillus                  | 0.000879919  | 0.981052282 | 0.993008299 |
| g Absiella        | g Kazachstania                 | 0.03712882   | 0.316111776 | 0.675194937 |
| g Absiella        | g Malassezia                   | -0.011330205 | 0.759741356 | 0.913900538 |
| g Absiella        | g unclassified Fungi           | -0.052098152 | 0.15939078  | 0.55592394  |
| g Absiella        | g Mycosphaerella               | -0.042893774 | 0.246754722 | 0.629733759 |
| g Absiella        | g Simplicillium                | -0.023874974 | 0.519254416 | 0.804094928 |
| g Absiella        | g unclassified Cordycipitaceae | 0.018881288  | 0.610285895 | 0.851291399 |
| g Absiella        | g unidentified                 | -0.097121396 | 0.008599142 | 0.177648425 |
| g Holdemania      | g Verticillium                 | 0.072844253  | 0.048983358 | 0.381430576 |
| g Holdemania      | g unclassified Tremellomycetes | -0.028081493 | 0.448397201 | 0.762502994 |
| g Holdemania      | g Candida                      | 0.019967008  | 0.589901959 | 0.842338356 |
| g Holdemania      | g Cladosporium                 | -0.007160075 | 0.846756745 | 0.947987714 |
| g Holdemania      | g Debaryomyces                 | -0.057222169 | 0.122168461 | 0.506577845 |
| g Holdemania      | g Aspergillus                  | 0.05275972   | 0.154152407 | 0.552027333 |
| g Holdemania      | g Kazachstania                 | -0.060369412 | 0.102910801 | 0.482467744 |

|                 |                                |              |             |             |
|-----------------|--------------------------------|--------------|-------------|-------------|
| g Holdemania    | g Malassezia                   | 0.002591935  | 0.944226793 | 0.979973315 |
| g Holdemania    | g unclassified Fungi           | 0.020721201  | 0.575929261 | 0.835860402 |
| g Holdemania    | g Mycosphaerella               | -0.013727383 | 0.710987849 | 0.902091837 |
| g Holdemania    | g Simplicillium                | 0.028976075  | 0.43406765  | 0.754608817 |
| g Holdemania    | g unclassified Cordycipitaceae | 0.055952681  | 0.130689487 | 0.517833494 |
| g Holdemania    | g unidentified                 | -0.03186124  | 0.389691535 | 0.729473876 |
| g Dielma        | g Verticillium                 | 0.011056317  | 0.765377031 | 0.916097697 |
| g Dielma        | g unclassified Tremellomycetes | -0.01783995  | 0.63012437  | 0.860051087 |
| g Dielma        | g Candida                      | -0.07800923  | 0.03496692  | 0.333329108 |
| g Dielma        | g Cladosporium                 | 0.01080467   | 0.770566045 | 0.917431355 |
| g Dielma        | g Debaryomyces                 | -0.111114468 | 0.002626424 | 0.097996477 |
| g Dielma        | g Aspergillus                  | -0.018516947 | 0.617195496 | 0.854828487 |
| g Dielma        | g Kazachstania                 | -0.006096417 | 0.869299488 | 0.955357756 |
| g Dielma        | g Malassezia                   | 0.043259525  | 0.242744824 | 0.62651847  |
| g Dielma        | g unclassified Fungi           | 0.007009448  | 0.849941918 | 0.948917865 |
| g Dielma        | g Mycosphaerella               | 0.008500845  | 0.818520523 | 0.936487497 |
| g Dielma        | g Simplicillium                | -0.063096346 | 0.088247391 | 0.465955266 |
| g Dielma        | g unclassified Cordycipitaceae | 0.033415857  | 0.366966179 | 0.715671969 |
| g Dielma        | g unidentified                 | 0.024100208  | 0.515319578 | 0.802518289 |
| g Holdemanella  | g Verticillium                 | 0.017459779  | 0.637434861 | 0.863812758 |
| g Holdemanella  | g unclassified Tremellomycetes | -0.069721721 | 0.059546817 | 0.412336263 |
| g Holdemanella  | g Candida                      | 0.005622493  | 0.87937902  | 0.959304186 |
| g Holdemanella  | g Cladosporium                 | -0.022684512 | 0.540305802 | 0.815420595 |
| g Holdemanella  | g Debaryomyces                 | -0.042573825 | 0.250300246 | 0.631891676 |
| g Holdemanella  | g Aspergillus                  | 0.031670869  | 0.392531909 | 0.730654821 |
| g Holdemanella  | g Kazachstania                 | 0.000475693  | 0.989755993 | 0.996055991 |
| g Holdemanella  | g Malassezia                   | 0.058560499  | 0.113661187 | 0.497214832 |
| g Holdemanella  | g unclassified Fungi           | 0.004288163  | 0.90785762  | 0.968833132 |
| g Holdemanella  | g Mycosphaerella               | 0.058708266  | 0.112751161 | 0.495487035 |
| g Holdemanella  | g Simplicillium                | 0.070173375  | 0.057911178 | 0.407963088 |
| g Holdemanella  | g unclassified Cordycipitaceae | 0.00620328   | 0.867029561 | 0.955196913 |
| g Holdemanella  | g unidentified                 | 0.080499029  | 0.029535732 | 0.313165257 |
| g Faecalococcus | g Verticillium                 | 0.063000768  | 0.08873126  | 0.465955266 |
| g Faecalococcus | g unclassified Tremellomycetes | -0.023479371 | 0.526202848 | 0.808287175 |
| g Faecalococcus | g Candida                      | -0.02351238  | 0.525621271 | 0.80809593  |
| g Faecalococcus | g Cladosporium                 | 0.021657784  | 0.558797718 | 0.82494384  |
| g Faecalococcus | g Debaryomyces                 | -0.006857343 | 0.853160841 | 0.949477689 |
| g Faecalococcus | g Aspergillus                  | 0.008787407  | 0.812514651 | 0.934142805 |
| g Faecalococcus | g Kazachstania                 | -0.003462699 | 0.925537258 | 0.974172444 |
| g Faecalococcus | g Malassezia                   | 0.070007165  | 0.05850871  | 0.409483575 |
| g Faecalococcus | g unclassified Fungi           | 0.00655373   | 0.85959327  | 0.952644081 |
| g Faecalococcus | g Mycosphaerella               | 0.005834627  | 0.874864803 | 0.957673757 |
| g Faecalococcus | g Simplicillium                | 0.029840968  | 0.420468166 | 0.74604389  |
| g Faecalococcus | g unclassified Cordycipitaceae | 0.069500432  | 0.060362056 | 0.412830947 |
| g Faecalococcus | g unidentified                 | -0.023001975 | 0.534650597 | 0.812183838 |
| g Solobacterium | g Verticillium                 | -0.015807671 | 0.669607003 | 0.880856251 |
| g Solobacterium | g unclassified Tremellomycetes | 0.026758342  | 0.470075101 | 0.77348991  |
| g Solobacterium | g Candida                      | -0.031239941 | 0.39900753  | 0.734026611 |
| g Solobacterium | g Cladosporium                 | -0.01994392  | 0.59033215  | 0.842463713 |
| g Solobacterium | g Debaryomyces                 | -0.038164291 | 0.302795075 | 0.668756962 |
| g Solobacterium | g Aspergillus                  | -0.00332666  | 0.928454666 | 0.974599406 |
| g Solobacterium | g Kazachstania                 | -0.036665485 | 0.32219292  | 0.679081423 |
| g Solobacterium | g Malassezia                   | 0.008165417  | 0.825564046 | 0.939367606 |
| g Solobacterium | g unclassified Fungi           | -0.022492314 | 0.543744023 | 0.816215242 |
| g Solobacterium | g Mycosphaerella               | -0.006912845 | 0.851985986 | 0.949400054 |
| g Solobacterium | g Simplicillium                | 0.074715665  | 0.043439997 | 0.363506278 |
| g Solobacterium | g unclassified Cordycipitaceae | 0.015458027  | 0.676496624 | 0.884589212 |
| g Solobacterium | g unidentified                 | -0.005629709 | 0.879225413 | 0.959304186 |
| g OEMR01        | g Verticillium                 | 0.026058891  | 0.481763966 | 0.780189053 |
| g OEMR01        | g unclassified Tremellomycetes | -0.033303378 | 0.368582182 | 0.716183741 |
| g OEMR01        | g Candida                      | 0.000850353  | 0.981688837 | 0.993008299 |
| g OEMR01        | g Cladosporium                 | 0.006871085  | 0.852869911 | 0.949477689 |
| g OEMR01        | g Debaryomyces                 | -0.08155711  | 0.027456824 | 0.305524053 |
| g OEMR01        | g Aspergillus                  | 0.051434682  | 0.164778066 | 0.56175306  |
| g OEMR01        | g Kazachstania                 | -0.03567096  | 0.33550125  | 0.690849237 |
| g OEMR01        | g Malassezia                   | 0.031460994  | 0.395677753 | 0.731875892 |
| g OEMR01        | g unclassified Fungi           | 0.024102837  | 0.515273747 | 0.802518289 |
| g OEMR01        | g Mycosphaerella               | -0.0074356   | 0.84093696  | 0.945770831 |
| g OEMR01        | g Simplicillium                | -0.00779455  | 0.833368069 | 0.941769117 |
| g OEMR01        | g unclassified Cordycipitaceae | 0.02421044   | 0.513399486 | 0.801060655 |
| g OEMR01        | g unidentified                 | 0.029966237  | 0.418519363 | 0.744941528 |
| g CAG-536       | g Verticillium                 | -0.007431472 | 0.841024093 | 0.945770831 |
| g CAG-536       | g unclassified Tremellomycetes | -0.051279679 | 0.166056167 | 0.562541523 |
| g CAG-536       | g Candida                      | -0.061541221 | 0.096388648 | 0.47685118  |
| g CAG-536       | g Cladosporium                 | 0.028297222  | 0.444917304 | 0.76170364  |
| g CAG-536       | g Debaryomyces                 | -0.051198746 | 0.166726463 | 0.562595483 |
| g CAG-536       | g Aspergillus                  | 0.019543141  | 0.597822623 | 0.846195692 |
| g CAG-536       | g Kazachstania                 | -0.060604459 | 0.101575218 | 0.480281034 |



|                          |                                |              |             |             |
|--------------------------|--------------------------------|--------------|-------------|-------------|
| g CAG-536                | g Malassezia                   | -0.001485525 | 0.96801704  | 0.988549475 |
| g CAG-536                | g unclassified Fungi           | 0.031076547  | 0.401479572 | 0.735790931 |
| g CAG-536                | g Mycosphaerella               | -0.001033659 | 0.977742527 | 0.991604689 |
| g CAG-536                | g Simplicillium                | 0.035363339  | 0.33968824  | 0.694470818 |
| g CAG-536                | g unclassified Cordycipitaceae | 0.016244313  | 0.661041982 | 0.876375094 |
| g CAG-536                | g unidentified                 | 0.003598291  | 0.922630426 | 0.973795648 |
| g Merdibacter            | g Verticillium                 | 0.022651262  | 0.540899833 | 0.815420595 |
| g Merdibacter            | g unclassified Tremellomycetes | -0.052941368 | 0.152737199 | 0.549189615 |
| g Merdibacter            | g Candida                      | 0.0153527    | 0.67857739  | 0.885522992 |
| g Merdibacter            | g Cladosporium                 | 0.034306516  | 0.354325957 | 0.705717538 |
| g Merdibacter            | g Debaryomyces                 | -0.016859627 | 0.649047235 | 0.8699978   |
| g Merdibacter            | g Aspergillus                  | 0.054117715  | 0.14381011  | 0.538689764 |
| g Merdibacter            | g Kazachstania                 | -0.039988377 | 0.280254472 | 0.657094722 |
| g Merdibacter            | g Malassezia                   | 0.004290254  | 0.907812896 | 0.968833132 |
| g Merdibacter            | g unclassified Fungi           | -0.008462246 | 0.819330313 | 0.936961169 |
| g Merdibacter            | g Mycosphaerella               | 0.017590522  | 0.634916711 | 0.862387935 |
| g Merdibacter            | g Simplicillium                | 0.062338568  | 0.092142537 | 0.471586801 |
| g Merdibacter            | g unclassified Cordycipitaceae | 0.033072179  | 0.371917735 | 0.717884076 |
| g Merdibacter            | g unidentified                 | -0.018308865 | 0.621156978 | 0.856123107 |
| g Faecalitalea           | g Verticillium                 | 0.005969179  | 0.872003605 | 0.956423148 |
| g Faecalitalea           | g unclassified Tremellomycetes | -0.03373111  | 0.362460392 | 0.713061139 |
| g Faecalitalea           | g Candida                      | -0.03985237  | 0.281894806 | 0.657094722 |
| g Faecalitalea           | g Cladosporium                 | 0.054642404  | 0.139959506 | 0.533896229 |
| g Faecalitalea           | g Debaryomyces                 | -0.072832005 | 0.049021507 | 0.381430576 |
| g Faecalitalea           | g Aspergillus                  | 0.029152784  | 0.43126866  | 0.753212133 |
| g Faecalitalea           | g Kazachstania                 | -0.017873657 | 0.62947792  | 0.859818244 |
| g Faecalitalea           | g Malassezia                   | 0.030342829  | 0.412692799 | 0.74272145  |
| g Faecalitalea           | g unclassified Fungi           | 0.007938963  | 0.830327246 | 0.940630371 |
| g Faecalitalea           | g Mycosphaerella               | -0.038292708 | 0.301169899 | 0.667386268 |
| g Faecalitalea           | g Simplicillium                | 0.025791121  | 0.486280219 | 0.782752856 |
| g Faecalitalea           | g unclassified Cordycipitaceae | 0.063196834  | 0.087740961 | 0.465488609 |
| g Faecalitalea           | g unidentified                 | 0.014982389  | 0.685912358 | 0.889341938 |
| g Erysipelatoclostridium | g Verticillium                 | -0.008190906 | 0.825028316 | 0.939308882 |
| g Erysipelatoclostridium | g unclassified Tremellomycetes | 0.001461094  | 0.968542753 | 0.988629248 |
| g Erysipelatoclostridium | g Candida                      | -0.074670338 | 0.043567731 | 0.363591268 |
| g Erysipelatoclostridium | g Cladosporium                 | 0.040235938  | 0.277285338 | 0.654270214 |
| g Erysipelatoclostridium | g Debaryomyces                 | -0.000551098 | 0.988132261 | 0.995185646 |
| g Erysipelatoclostridium | g Aspergillus                  | -0.025441261 | 0.492215273 | 0.785969824 |
| g Erysipelatoclostridium | g Kazachstania                 | -0.008592419 | 0.816600107 | 0.935707886 |
| g Erysipelatoclostridium | g Malassezia                   | 0.027659504  | 0.455248646 | 0.76601068  |
| g Erysipelatoclostridium | g unclassified Fungi           | -0.022404073 | 0.545326192 | 0.816215242 |
| g Erysipelatoclostridium | g Mycosphaerella               | 0.036757407  | 0.320980444 | 0.678140479 |
| g Erysipelatoclostridium | g Simplicillium                | 0.003176393  | 0.931678333 | 0.976058688 |
| g Erysipelatoclostridium | g unclassified Cordycipitaceae | 0.086946327  | 0.018712981 | 0.265443384 |
| g Erysipelatoclostridium | g unidentified                 | 0.010651104  | 0.773737646 | 0.918520503 |
| g Massiliomicrobiota     | g Verticillium                 | -0.000984052 | 0.978810435 | 0.991933732 |
| g Massiliomicrobiota     | g unclassified Tremellomycetes | 0.000988819  | 0.978707825 | 0.991924739 |
| g Massiliomicrobiota     | g Candida                      | -0.011996561 | 0.746083593 | 0.909778357 |
| g Massiliomicrobiota     | g Cladosporium                 | 0.058938028  | 0.111347555 | 0.49451218  |
| g Massiliomicrobiota     | g Debaryomyces                 | 0.00389758   | 0.916217913 | 0.971437239 |
| g Massiliomicrobiota     | g Aspergillus                  | -0.075242533 | 0.041978281 | 0.357372624 |
| g Massiliomicrobiota     | g Kazachstania                 | 0.042128109  | 0.255298418 | 0.635647844 |
| g Massiliomicrobiota     | g Malassezia                   | 0.016265378  | 0.660629887 | 0.876274631 |
| g Massiliomicrobiota     | g unclassified Fungi           | -0.021141756 | 0.568206079 | 0.83054176  |
| g Massiliomicrobiota     | g Mycosphaerella               | 0.032409271  | 0.381584714 | 0.723098466 |
| g Massiliomicrobiota     | g Simplicillium                | -0.028244806 | 0.445761398 | 0.761797014 |
| g Massiliomicrobiota     | g unclassified Cordycipitaceae | 0.028755356  | 0.437578408 | 0.756652573 |
| g Massiliomicrobiota     | g unidentified                 | -0.054230336 | 0.142976843 | 0.538044435 |
| g KLE1796                | g Verticillium                 | -0.030712276 | 0.407023654 | 0.738420989 |
| g KLE1796                | g unclassified Tremellomycetes | -0.01230433  | 0.739801996 | 0.908870682 |
| g KLE1796                | g Candida                      | -0.067658138 | 0.067513742 | 0.433776817 |
| g KLE1796                | g Cladosporium                 | -0.02394277  | 0.518068389 | 0.803768376 |
| g KLE1796                | g Debaryomyces                 | -0.018050684 | 0.626087512 | 0.8579572   |
| g KLE1796                | g Aspergillus                  | -0.007619529 | 0.837056708 | 0.94381823  |
| g KLE1796                | g Kazachstania                 | 0.017249083  | 0.641501698 | 0.864870808 |
| g KLE1796                | g Malassezia                   | -0.014835469 | 0.688830727 | 0.89153703  |
| g KLE1796                | g unclassified Fungi           | -0.059621937 | 0.107250931 | 0.488444035 |
| g KLE1796                | g Mycosphaerella               | 0.00690014   | 0.852254899 | 0.949400054 |
| g KLE1796                | g Simplicillium                | -0.012822428 | 0.729266746 | 0.907147138 |
| g KLE1796                | g unclassified Cordycipitaceae | -0.001499984 | 0.967705912 | 0.988549475 |
| g KLE1796                | g unidentified                 | 0.03452897   | 0.351212242 | 0.703126667 |
| g Catenibacterium        | g Verticillium                 | -0.004453271 | 0.904326554 | 0.967483304 |
| g Catenibacterium        | g unclassified Tremellomycetes | -0.03083835  | 0.40509971  | 0.737444543 |
| g Catenibacterium        | g Candida                      | -0.015090472 | 0.683768401 | 0.888296381 |
| g Catenibacterium        | g Cladosporium                 | -0.014501601 | 0.695479748 | 0.895089116 |
| g Catenibacterium        | g Debaryomyces                 | -0.061968243 | 0.094095599 | 0.47324932  |
| g Catenibacterium        | g Aspergillus                  | 0.015539228  | 0.674894148 | 0.883433477 |
| g Catenibacterium        | g Kazachstania                 | -0.03305052  | 0.37223116  | 0.717941299 |

|                   |                                |              |             |              |
|-------------------|--------------------------------|--------------|-------------|--------------|
| g Catenibacterium | g Malassezia                   | 0.00539697   | 0.884182472 | 0.961776517  |
| g Catenibacterium | g unclassified Fungi           | 0.027915457  | 0.451085973 | 0.764111513  |
| g Catenibacterium | g Mycosphaerella               | 0.008908382  | 0.809982491 | 0.933584001  |
| g Catenibacterium | g Simplicillium                | 0.007116606  | 0.847675689 | 0.948213968  |
| g Catenibacterium | g unclassified Cordycipitaceae | -0.00957516  | 0.796062253 | 0.928870963  |
| g Catenibacterium | g unidentified                 | 0.056396609  | 0.127658929 | 0.51521926   |
| g Beduini         | g Verticillium                 | -0.062801385 | 0.089747507 | 0.467376042  |
| g Beduini         | g unclassified Tremellomycetes | -0.061498514 | 0.096620411 | 0.477459115  |
| g Beduini         | g Candida                      | -0.038615619 | 0.297108973 | 0.665940424  |
| g Beduini         | g Cladosporium                 | 0.032422109  | 0.381396052 | 0.723098466  |
| g Beduini         | g Debaryomyces                 | -0.020374097 | 0.582340583 | 0.838552014  |
| g Beduini         | g Aspergillus                  | -0.017877285 | 0.629408361 | 0.859818244  |
| g Beduini         | g Kazachstania                 | -0.003035518 | 0.934701524 | 0.976793554  |
| g Beduini         | g Malassezia                   | -0.006793049 | 0.854522198 | 0.950282941  |
| g Beduini         | g unclassified Fungi           | -0.048010216 | 0.194776048 | 0.584265492  |
| g Beduini         | g Mycosphaerella               | -0.033320521 | 0.36833561  | 0.71614358   |
| g Beduini         | g Simplicillium                | 0.002723311  | 0.941404809 | 0.978580126  |
| g Beduini         | g unclassified Cordycipitaceae | 0.023676703  | 0.522730962 | 0.805852786  |
| g Beduini         | g unidentified                 | 0.013407181  | 0.717437194 | 0.903293001  |
| g Coprobacillus   | g Verticillium                 | -0.008396177 | 0.820716877 | 0.937561364  |
| g Coprobacillus   | g unclassified Tremellomycetes | -0.058309164 | 0.115222296 | 0.498170056  |
| g Coprobacillus   | g Candida                      | -0.052270672 | 0.158011964 | 0.554768804  |
| g Coprobacillus   | g Cladosporium                 | 0.061024562  | 0.099222442 | 0.478320958  |
| g Coprobacillus   | g Debaryomyces                 | -0.057776954 | 0.1185835   | 0.502487018  |
| g Coprobacillus   | g Aspergillus                  | 0.033419163  | 0.36691874  | 0.715671969  |
| g Coprobacillus   | g Kazachstania                 | 0.015761387  | 0.670517431 | 0.881308589  |
| g Coprobacillus   | g Malassezia                   | -0.029971058 | 0.418444473 | 0.744941528  |
| g Coprobacillus   | g unclassified Fungi           | -0.008552093 | 0.817445666 | 0.93628373   |
| g Coprobacillus   | g Mycosphaerella               | 0.023143557  | 0.532138134 | 0.811490628  |
| g Coprobacillus   | g Simplicillium                | -0.017769825 | 0.631470141 | 0.860229872  |
| g Coprobacillus   | g unclassified Cordycipitaceae | 0.064588341  | 0.080965774 | 0.432126167  |
| g Coprobacillus   | g unidentified                 | -0.007015728 | 0.849809085 | 0.948917865  |
| g Stoquefichus    | g Verticillium                 | -0.011437261 | 0.757541939 | 0.912291885  |
| g Stoquefichus    | g unclassified Tremellomycetes | -0.019939113 | 0.590421739 | 0.842463713  |
| g Stoquefichus    | g Candida                      | -0.048033048 | 0.194563608 | 0.584077193  |
| g Stoquefichus    | g Cladosporium                 | 0.049559219  | 0.180745673 | 0.575010893  |
| g Stoquefichus    | g Debaryomyces                 | 0.032156812  | 0.385306334 | 0.72553615   |
| g Stoquefichus    | g Aspergillus                  | -0.024838943 | 0.502523192 | 0.793568839  |
| g Stoquefichus    | g Kazachstania                 | 0.004265371  | 0.908345217 | 0.968963744  |
| g Stoquefichus    | g Malassezia                   | -0.028635221 | 0.4394961   | 0.758246834  |
| g Stoquefichus    | g unclassified Fungi           | -0.031173891 | 0.400005717 | 0.734999218  |
| g Stoquefichus    | g Mycosphaerella               | 0.02563815   | 0.488870467 | 0.783941094  |
| g Stoquefichus    | g Simplicillium                | -0.006036873 | 0.870564761 | 0.955832776  |
| g Stoquefichus    | g unclassified Cordycipitaceae | 0.048422878  | 0.19096266  | 0.580402598  |
| g Stoquefichus    | g unidentified                 | -0.036119267 | 0.329459058 | 0.685207498  |
| g Bacillus A      | g Verticillium                 | -0.035763088 | 0.334253792 | 0.689891481  |
| g Bacillus A      | g unclassified Tremellomycetes | -0.04256446  | 0.25040456  | 0.631891676  |
| g Bacillus A      | g Candida                      | 0.008828032  | 0.811664109 | 0.934113162  |
| g Bacillus A      | g Cladosporium                 | -0.028945089 | 0.434559524 | 0.7546022456 |
| g Bacillus A      | g Debaryomyces                 | 0.029173554  | 0.430940361 | 0.753212133  |
| g Bacillus A      | g Aspergillus                  | 0.064171564  | 0.082949057 | 0.435435557  |
| g Bacillus A      | g Kazachstania                 | -0.042289192 | 0.253484132 | 0.634509259  |
| g Bacillus A      | g Malassezia                   | 0.011232324  | 0.761753955 | 0.914666261  |
| g Bacillus A      | g unclassified Fungi           | 0.034348482  | 0.353737215 | 0.705388488  |
| g Bacillus A      | g Mycosphaerella               | 0.029202878  | 0.430477102 | 0.753192575  |
| g Bacillus A      | g Simplicillium                | 0.051482306  | 0.164386865 | 0.561723687  |
| g Bacillus A      | g unclassified Cordycipitaceae | -0.052986289 | 0.152388748 | 0.549189615  |
| g Bacillus A      | g unidentified                 | 0.05862697   | 0.113251114 | 0.496447096  |
| g FJAT-27916      | g Verticillium                 | 0.080470481  | 0.029593645 | 0.313165257  |
| g FJAT-27916      | g unclassified Tremellomycetes | -0.032563482 | 0.379322283 | 0.722533174  |
| g FJAT-27916      | g Candida                      | -0.039568033 | 0.285345076 | 0.658617299  |
| g FJAT-27916      | g Cladosporium                 | 0.043276249  | 0.24256257  | 0.626487849  |
| g FJAT-27916      | g Debaryomyces                 | -0.045530395 | 0.218870593 | 0.606623524  |
| g FJAT-27916      | g Aspergillus                  | 0.053542198  | 0.148126406 | 0.543883979  |
| g FJAT-27916      | g Kazachstania                 | -0.103861894 | 0.004940083 | 0.138141091  |
| g FJAT-27916      | g Malassezia                   | 0.044103487  | 0.233667168 | 0.617739342  |
| g FJAT-27916      | g unclassified Fungi           | -0.005348705 | 0.885211036 | 0.962031753  |
| g FJAT-27916      | g Mycosphaerella               | 0.028593784  | 0.440158675 | 0.758246834  |
| g FJAT-27916      | g Simplicillium                | 0.01702632   | 0.645813164 | 0.868076943  |
| g FJAT-27916      | g unclassified Cordycipitaceae | 0.10617536   | 0.004054643 | 0.124539164  |
| g FJAT-27916      | g unidentified                 | -0.00382273  | 0.917821142 | 0.971437239  |
| g Bacillus W      | g Verticillium                 | -0.026946191 | 0.46696271  | 0.772326375  |
| g Bacillus W      | g unclassified Tremellomycetes | 0.008794525  | 0.812365618 | 0.934142805  |
| g Bacillus W      | g Candida                      | -0.039644263 | 0.284417284 | 0.658002559  |
| g Bacillus W      | g Cladosporium                 | -0.012746943 | 0.730798575 | 0.907315107  |
| g Bacillus W      | g Debaryomyces                 | -0.009978168 | 0.787679699 | 0.925277255  |
| g Bacillus W      | g Aspergillus                  | -0.005149202 | 0.889464599 | 0.962882845  |
| g Bacillus W      | g Kazachstania                 | -0.019270872 | 0.602935714 | 0.848214003  |

|                   |                                |              |             |             |
|-------------------|--------------------------------|--------------|-------------|-------------|
| g Bacillus W      | g Malassezia                   | 0.04396093   | 0.235183424 | 0.619373537 |
| g Bacillus W      | g unclassified Fungi           | -0.048471195 | 0.190519773 | 0.580402598 |
| g Bacillus W      | g Mycosphaerella               | -0.021458443 | 0.562423201 | 0.827219568 |
| g Bacillus W      | g Simplicillium                | 0.037045699  | 0.31719715  | 0.675963115 |
| g Bacillus W      | g unclassified Cordycipitaceae | -0.004823938 | 0.896406285 | 0.965082397 |
| g Bacillus W      | g unidentified                 | 0.032754241  | 0.376535071 | 0.720393079 |
| g MGYG-HGUT-04249 | g Verticillium                 | 0.014821686  | 0.689104759 | 0.891576094 |
| g MGYG-HGUT-04249 | g unclassified Tremellomycetes | -0.042847723 | 0.24726286  | 0.629733759 |
| g MGYG-HGUT-04249 | g Candida                      | -0.026039129 | 0.482096494 | 0.780189053 |
| g MGYG-HGUT-04249 | g Cladosporium                 | 0.042214823  | 0.25432064  | 0.635021476 |
| g MGYG-HGUT-04249 | g Debaryomyces                 | -0.00713767  | 0.847230379 | 0.948182609 |
| g MGYG-HGUT-04249 | g Aspergillus                  | -0.039122874 | 0.290803837 | 0.660476148 |
| g MGYG-HGUT-04249 | g Kazachstania                 | -0.012298135 | 0.739928267 | 0.908870682 |
| g MGYG-HGUT-04249 | g Malassezia                   | 0.007016861  | 0.849785102 | 0.948917865 |
| g MGYG-HGUT-04249 | g unclassified Fungi           | 0.005727368  | 0.877146774 | 0.957990211 |
| g MGYG-HGUT-04249 | g Mycosphaerella               | 0.022694006  | 0.540136252 | 0.815420595 |
| g MGYG-HGUT-04249 | g Simplicillium                | -0.05213297  | 0.159111776 | 0.555683436 |
| g MGYG-HGUT-04249 | g unclassified Cordycipitaceae | 0.084278479  | 0.022679309 | 0.283321191 |
| g MGYG-HGUT-04249 | g unidentified                 | 0.004362832  | 0.906260494 | 0.968202781 |
| g UBA5026         | g Verticillium                 | 0.030699268  | 0.407222466 | 0.738420989 |
| g UBA5026         | g unclassified Tremellomycetes | -0.020616725 | 0.577855527 | 0.836392721 |
| g UBA5026         | g Candida                      | -0.077774564 | 0.035520135 | 0.335601849 |
| g UBA5026         | g Cladosporium                 | 0.008199009  | 0.824858019 | 0.939308882 |
| g UBA5026         | g Debaryomyces                 | -0.06655391  | 0.072124154 | 0.442158914 |
| g UBA5026         | g Aspergillus                  | 0.039704133  | 0.283690045 | 0.658002559 |
| g UBA5026         | g Kazachstania                 | 0.007948128  | 0.830134356 | 0.940630371 |
| g UBA5026         | g Malassezia                   | 0.029591231  | 0.424369143 | 0.747983848 |
| g UBA5026         | g unclassified Fungi           | 0.034719544  | 0.348558558 | 0.700293652 |
| g UBA5026         | g Mycosphaerella               | 0.034203967  | 0.355767184 | 0.706489987 |
| g UBA5026         | g Simplicillium                | 0.013564823  | 0.714259503 | 0.902914115 |
| g UBA5026         | g unclassified Cordycipitaceae | 0.066760678  | 0.071241789 | 0.441957504 |
| g UBA5026         | g unidentified                 | 0.027865095  | 0.451903333 | 0.76468047  |
| g CAG-594         | g Verticillium                 | 0.050748208  | 0.170494996 | 0.564916697 |
| g CAG-594         | g unclassified Tremellomycetes | -0.05873485  | 0.112588047 | 0.495487035 |
| g CAG-594         | g Candida                      | -0.019065878 | 0.606798332 | 0.850594775 |
| g CAG-594         | g Cladosporium                 | -0.050938777 | 0.168893279 | 0.563848296 |
| g CAG-594         | g Debaryomyces                 | -0.080764816 | 0.029001201 | 0.311248184 |
| g CAG-594         | g Aspergillus                  | 0.136214626  | 0.000220959 | 0.024874387 |
| g CAG-594         | g Kazachstania                 | 0.000750976  | 0.983828458 | 0.993484837 |
| g CAG-594         | g Malassezia                   | 0.053950103  | 0.145057122 | 0.540332211 |
| g CAG-594         | g unclassified Fungi           | 0.028506314  | 0.441559186 | 0.75910048  |
| g CAG-594         | g Mycosphaerella               | 0.004639253  | 0.900351316 | 0.96604016  |
| g CAG-594         | g Simplicillium                | 0.012786624  | 0.729993188 | 0.907197641 |
| g CAG-594         | g unclassified Cordycipitaceae | 0.044417883  | 0.230347709 | 0.615229544 |
| g CAG-594         | g unidentified                 | -0.048771662 | 0.187782557 | 0.577785957 |
| g RUG832          | g Verticillium                 | 0.025601718  | 0.489488469 | 0.784575429 |
| g RUG832          | g unclassified Tremellomycetes | -0.050927203 | 0.168990234 | 0.563848296 |
| g RUG832          | g Candida                      | -0.072943528 | 0.048675087 | 0.380132675 |
| g RUG832          | g Cladosporium                 | 0.00334488   | 0.928063881 | 0.974599406 |
| g RUG832          | g Debaryomyces                 | -0.046934165 | 0.204981394 | 0.594296482 |
| g RUG832          | g Aspergillus                  | 0.067146611  | 0.069618485 | 0.439036238 |
| g RUG832          | g Kazachstania                 | -0.008408837 | 0.820451131 | 0.937561364 |
| g RUG832          | g Malassezia                   | 0.012441312  | 0.737011706 | 0.90779094  |
| g RUG832          | g unclassified Fungi           | 0.035319263  | 0.340290884 | 0.694699556 |
| g RUG832          | g Mycosphaerella               | 0.003492145  | 0.924905911 | 0.974172444 |
| g RUG832          | g Simplicillium                | 0.017747155  | 0.631905468 | 0.860595065 |
| g RUG832          | g unclassified Cordycipitaceae | 0.06665028   | 0.071711797 | 0.442098997 |
| g RUG832          | g unidentified                 | -0.000976939 | 0.978963574 | 0.991993923 |
| g CAG-822         | g Verticillium                 | -0.010657476 | 0.773605969 | 0.918520503 |
| g CAG-822         | g unclassified Tremellomycetes | 0.000878848  | 0.981075352 | 0.993008299 |
| g CAG-822         | g Candida                      | 0.011501363  | 0.75622593  | 0.912160355 |
| g CAG-822         | g Cladosporium                 | -0.004104644 | 0.911784577 | 0.970186465 |
| g CAG-822         | g Debaryomyces                 | 0.02558345   | 0.489798507 | 0.784889649 |
| g CAG-822         | g Aspergillus                  | 0.009964637  | 0.787960741 | 0.925277255 |
| g CAG-822         | g Kazachstania                 | 0.011736753  | 0.75139947  | 0.910387945 |
| g CAG-822         | g Malassezia                   | -0.04705944  | 0.203773704 | 0.593377363 |
| g CAG-822         | g unclassified Fungi           | 0.023169245  | 0.531682921 | 0.811490628 |
| g CAG-822         | g Mycosphaerella               | 0.020866141  | 0.57326196  | 0.833849905 |
| g CAG-822         | g Simplicillium                | 0.001848988  | 0.960197624 | 0.985147494 |
| g CAG-822         | g unclassified Cordycipitaceae | -0.023544411 | 0.525057225 | 0.807399615 |
| g CAG-822         | g unidentified                 | 0.057599614  | 0.11972039  | 0.503129929 |
| g CAG-884         | g Verticillium                 | 0.006163336  | 0.867877901 | 0.955229514 |
| g CAG-884         | g unclassified Tremellomycetes | -0.033962924 | 0.359169326 | 0.710264446 |
| g CAG-884         | g Candida                      | -0.044575374 | 0.228697514 | 0.613524642 |
| g CAG-884         | g Cladosporium                 | 0.018889906  | 0.610122859 | 0.851291399 |
| g CAG-884         | g Debaryomyces                 | 0.032180959  | 0.384949414 | 0.725207645 |
| g CAG-884         | g Aspergillus                  | -0.013315111 | 0.719295382 | 0.904525696 |
| g CAG-884         | g Kazachstania                 | 0.037642059  | 0.309464022 | 0.672075778 |

|                   |                                |              |             |             |
|-------------------|--------------------------------|--------------|-------------|-------------|
| g CAG-884         | g Malassezia                   | 0.028205257  | 0.446398897 | 0.761832544 |
| g CAG-884         | g unclassified Fungi           | -0.048932565 | 0.186328723 | 0.577204492 |
| g CAG-884         | g Mycosphaerella               | 0.058356324  | 0.114928099 | 0.498021764 |
| g CAG-884         | g Simplicillium                | 0.01841815   | 0.619075028 | 0.856010969 |
| g CAG-884         | g unclassified Cordycipitaceae | 0.037622705  | 0.309713017 | 0.672249255 |
| g CAG-884         | g unidentified                 | -0.044664908 | 0.227763129 | 0.612967811 |
| g MGYG-HGUT-01840 | g Verticillium                 | -0.015741101 | 0.670916624 | 0.881504807 |
| g MGYG-HGUT-01840 | g unclassified Tremellomycetes | -0.053763215 | 0.146457278 | 0.541068386 |
| g MGYG-HGUT-01840 | g Candida                      | 0.012996026  | 0.725747995 | 0.906885231 |
| g MGYG-HGUT-01840 | g Cladosporium                 | -0.099900543 | 0.006868475 | 0.158004799 |
| g MGYG-HGUT-01840 | g Debaryomyces                 | -0.0609054   | 0.099885353 | 0.478320958 |
| g MGYG-HGUT-01840 | g Aspergillus                  | 0.00222214   | 0.952173719 | 0.982634054 |
| g MGYG-HGUT-01840 | g Kazachstania                 | 0.037225449  | 0.314853086 | 0.674995007 |
| g MGYG-HGUT-01840 | g Malassezia                   | -0.010427132 | 0.778370123 | 0.921057082 |
| g MGYG-HGUT-01840 | g unclassified Fungi           | -0.023187976 | 0.531351111 | 0.811448513 |
| g MGYG-HGUT-01840 | g Mycosphaerella               | 0.031566337  | 0.394096856 | 0.730848211 |
| g MGYG-HGUT-01840 | g Simplicillium                | 0.025698424  | 0.487848965 | 0.783353899 |
| g MGYG-HGUT-01840 | g unclassified Cordycipitaceae | -0.016855091 | 0.649133529 | 0.8699978   |
| g MGYG-HGUT-01840 | g unidentified                 | 0.040634465  | 0.272550664 | 0.649853264 |
| g MGYG-HGUT-02207 | g Verticillium                 | -0.029508523 | 0.425665708 | 0.749483281 |
| g MGYG-HGUT-02207 | g unclassified Tremellomycetes | 0.005096034  | 0.890598745 | 0.962946999 |
| g MGYG-HGUT-02207 | g Candida                      | -0.040837461 | 0.270160332 | 0.648110713 |
| g MGYG-HGUT-02207 | g Cladosporium                 | 0.013501041  | 0.715544603 | 0.903028382 |
| g MGYG-HGUT-02207 | g Debaryomyces                 | -0.064873093 | 0.079632974 | 0.45101344  |
| g MGYG-HGUT-02207 | g Aspergillus                  | -0.034578571 | 0.350520327 | 0.702774112 |
| g MGYG-HGUT-02207 | g Kazachstania                 | 0.023896578  | 0.518876322 | 0.80396368  |
| g MGYG-HGUT-02207 | g Malassezia                   | 0.018967479  | 0.608656323 | 0.851291399 |
| g MGYG-HGUT-02207 | g unclassified Fungi           | -0.02371497  | 0.522059044 | 0.805467412 |
| g MGYG-HGUT-02207 | g Mycosphaerella               | -0.04829328  | 0.192154317 | 0.581297022 |
| g MGYG-HGUT-02207 | g Simplicillium                | 0.042997557  | 0.245612221 | 0.628857614 |
| g MGYG-HGUT-02207 | g unclassified Cordycipitaceae | -0.006339672 | 0.864133989 | 0.953959668 |
| g MGYG-HGUT-02207 | g unidentified                 | 0.015932747  | 0.667149108 | 0.879421986 |
| g CAG-710         | g Verticillium                 | 0.002739159  | 0.941064429 | 0.978494742 |
| g CAG-710         | g unclassified Tremellomycetes | -0.095333275 | 0.009908911 | 0.192910919 |
| g CAG-710         | g Candida                      | -0.044148628 | 0.23318849  | 0.617638717 |
| g CAG-710         | g Cladosporium                 | 0.007909048  | 0.830956948 | 0.940950929 |
| g CAG-710         | g Debaryomyces                 | -0.068205871 | 0.065318242 | 0.424832637 |
| g CAG-710         | g Aspergillus                  | 0.036966705  | 0.318230889 | 0.676223819 |
| g CAG-710         | g Kazachstania                 | -0.008546112 | 0.817571091 | 0.93628373  |
| g CAG-710         | g Malassezia                   | 0.002892565  | 0.937770264 | 0.977568509 |
| g CAG-710         | g unclassified Fungi           | 0.024926313  | 0.501020946 | 0.792378366 |
| g CAG-710         | g Mycosphaerella               | -0.009397671 | 0.79976154  | 0.929905946 |
| g CAG-710         | g Simplicillium                | 0.027938065  | 0.450719327 | 0.764099955 |
| g CAG-710         | g unclassified Cordycipitaceae | 0.027624165  | 0.455825071 | 0.766328212 |
| g CAG-710         | g unidentified                 | 0.02264689   | 0.540977968 | 0.815420595 |
| g CAG-611         | g Verticillium                 | -0.016671839 | 0.652698483 | 0.872275283 |
| g CAG-611         | g unclassified Tremellomycetes | -0.055446491 | 0.134212714 | 0.52297511  |
| g CAG-611         | g Candida                      | -0.011832455 | 0.749439939 | 0.910387945 |
| g CAG-611         | g Cladosporium                 | -0.005874403 | 0.874018813 | 0.957439656 |
| g CAG-611         | g Debaryomyces                 | -0.019996637 | 0.589350102 | 0.842201591 |
| g CAG-611         | g Aspergillus                  | 0.068312287  | 0.064898581 | 0.423806055 |
| g CAG-611         | g Kazachstania                 | -0.031588754 | 0.393760935 | 0.730757316 |
| g CAG-611         | g Malassezia                   | -0.000868232 | 0.981303899 | 0.993008299 |
| g CAG-611         | g unclassified Fungi           | 0.057682654  | 0.119186984 | 0.502959311 |
| g CAG-611         | g Mycosphaerella               | 0.002090414  | 0.955005723 | 0.983420654 |
| g CAG-611         | g Simplicillium                | 0.028399889  | 0.4432666   | 0.760357783 |
| g CAG-611         | g unclassified Cordycipitaceae | -0.049121626 | 0.18463108  | 0.576342405 |
| g CAG-611         | g unidentified                 | 0.091955963  | 0.012874167 | 0.221076037 |
| g UBA7057         | g Verticillium                 | 0.030446022  | 0.411104629 | 0.74205734  |
| g UBA7057         | g unclassified Tremellomycetes | -0.027243298 | 0.462063449 | 0.769075712 |
| g UBA7057         | g Candida                      | -0.031987742 | 0.38781102  | 0.727338873 |
| g UBA7057         | g Cladosporium                 | -0.035418666 | 0.338932742 | 0.693328103 |
| g UBA7057         | g Debaryomyces                 | -0.009518924 | 0.797233863 | 0.929238701 |
| g UBA7057         | g Aspergillus                  | -0.011519179 | 0.755860294 | 0.911989902 |
| g UBA7057         | g Kazachstania                 | 0.024989559  | 0.499934959 | 0.791370491 |
| g UBA7057         | g Malassezia                   | 0.019924962  | 0.590685508 | 0.842463713 |
| g UBA7057         | g unclassified Fungi           | 0.007815712  | 0.832922324 | 0.94166496  |
| g UBA7057         | g Mycosphaerella               | 0.013441392  | 0.716747166 | 0.903293001 |
| g UBA7057         | g Simplicillium                | 0.00891646   | 0.809813487 | 0.933584001 |
| g UBA7057         | g unclassified Cordycipitaceae | 0.016816121  | 0.649892387 | 0.870052588 |
| g UBA7057         | g unidentified                 | -0.019502541 | 0.59858383  | 0.846523771 |
| g CAG-417         | g Verticillium                 | 0.075433148  | 0.041459785 | 0.35586306  |
| g CAG-417         | g unclassified Tremellomycetes | -0.037611798 | 0.309853396 | 0.672249972 |
| g CAG-417         | g Candida                      | -0.099216027 | 0.007262957 | 0.163524696 |
| g CAG-417         | g Cladosporium                 | 0.0193997    | 0.60051394  | 0.847052968 |
| g CAG-417         | g Debaryomyces                 | -0.072713302 | 0.049392493 | 0.382629107 |
| g CAG-417         | g Aspergillus                  | 0.055088361  | 0.136749364 | 0.527990969 |
| g CAG-417         | g Kazachstania                 | -0.040916304 | 0.269235816 | 0.646742561 |



|            |                                |              |             |             |
|------------|--------------------------------|--------------|-------------|-------------|
| g CAG-417  | g Malassezia                   | 0.007051317  | 0.849056302 | 0.948917865 |
| g CAG-417  | g unclassified Fungi           | -0.007388706 | 0.841926872 | 0.945972695 |
| g CAG-417  | g Mycosphaerella               | 0.012611486  | 0.733550108 | 0.907315107 |
| g CAG-417  | g Simplicillium                | 0.012244464  | 0.74102253  | 0.90933095  |
| g CAG-417  | g unclassified Cordycipitaceae | 0.101172768  | 0.006185999 | 0.149452601 |
| g CAG-417  | g unidentified                 | 0.043029295  | 0.245263578 | 0.628611967 |
| g CAG-877  | g Verticillium                 | 0.039420886  | 0.287141767 | 0.659118237 |
| g CAG-877  | g unclassified Tremellomycetes | -0.04549332  | 0.219246356 | 0.60663028  |
| g CAG-877  | g Candida                      | 0.000211853  | 0.995437664 | 0.99788948  |
| g CAG-877  | g Cladosporium                 | -0.051862304 | 0.16129039  | 0.558682457 |
| g CAG-877  | g Debaryomyces                 | 0.004423111  | 0.904971418 | 0.967495419 |
| g CAG-877  | g Aspergillus                  | 0.003942968  | 0.915245915 | 0.97142751  |
| g CAG-877  | g Kazachstania                 | 0.021914189  | 0.554151109 | 0.821062313 |
| g CAG-877  | g Malassezia                   | -0.006961561 | 0.850955064 | 0.949373378 |
| g CAG-877  | g unclassified Fungi           | -0.005271003 | 0.886867311 | 0.962151926 |
| g CAG-877  | g Mycosphaerella               | 0.041907433  | 0.257798486 | 0.637448375 |
| g CAG-877  | g Simplicillium                | 0.035837509  | 0.333248276 | 0.688756495 |
| g CAG-877  | g unclassified Cordycipitaceae | 0.021450611  | 0.562565877 | 0.827219568 |
| g CAG-877  | g unidentified                 | -0.005142917 | 0.889598666 | 0.962882845 |
| g CAG-451  | g Verticillium                 | 0.070091232  | 0.058205848 | 0.408444486 |
| g CAG-451  | g unclassified Tremellomycetes | -0.070010106 | 0.058498093 | 0.409483575 |
| g CAG-451  | g Candida                      | -0.070290275 | 0.057493955 | 0.407502367 |
| g CAG-451  | g Cladosporium                 | -0.047712008 | 0.19756627  | 0.58591995  |
| g CAG-451  | g Debaryomyces                 | -0.020431609 | 0.581275981 | 0.83790164  |
| g CAG-451  | g Aspergillus                  | 0.062170487  | 0.093024918 | 0.471954484 |
| g CAG-451  | g Kazachstania                 | 0.000411945  | 0.991128752 | 0.996591073 |
| g CAG-451  | g Malassezia                   | 0.039390399  | 0.287514972 | 0.659362601 |
| g CAG-451  | g unclassified Fungi           | 0.006438987  | 0.862026707 | 0.953015155 |
| g CAG-451  | g Mycosphaerella               | 0.041726679  | 0.259858863 | 0.638398936 |
| g CAG-451  | g Simplicillium                | 0.054105361  | 0.143901745 | 0.538704729 |
| g CAG-451  | g unclassified Cordycipitaceae | 0.051927503  | 0.160763555 | 0.557764638 |
| g CAG-451  | g unidentified                 | 0.057580071  | 0.119846198 | 0.503258914 |
| g CAG-628  | g Verticillium                 | 0.04471411   | 0.227250809 | 0.612967811 |
| g CAG-628  | g unclassified Tremellomycetes | -0.01541389  | 0.677368258 | 0.884796861 |
| g CAG-628  | g Candida                      | -0.034982026 | 0.344924456 | 0.696679266 |
| g CAG-628  | g Cladosporium                 | -0.000932701 | 0.979915943 | 0.992768838 |
| g CAG-628  | g Debaryomyces                 | -0.022644568 | 0.541019467 | 0.815420595 |
| g CAG-628  | g Aspergillus                  | -0.037480878 | 0.311541728 | 0.627399691 |
| g CAG-628  | g Kazachstania                 | 0.01204804   | 0.745031707 | 0.909574751 |
| g CAG-628  | g Malassezia                   | 0.07332702   | 0.04749948  | 0.377185783 |
| g CAG-628  | g unclassified Fungi           | -0.014368737 | 0.698132286 | 0.895302916 |
| g CAG-628  | g Mycosphaerella               | -0.012164733 | 0.742649074 | 0.909574751 |
| g CAG-628  | g Simplicillium                | -0.003191225 | 0.931360104 | 0.976058688 |
| g CAG-628  | g unclassified Cordycipitaceae | 0.093824323  | 0.01114916  | 0.204210749 |
| g CAG-628  | g unidentified                 | -0.05407911  | 0.144096596 | 0.538704729 |
| g CAG-460  | g Verticillium                 | -0.018359093 | 0.62019726  | 0.856123107 |
| g CAG-460  | g unclassified Tremellomycetes | -0.053793097 | 0.146232713 | 0.541002079 |
| g CAG-460  | g Candida                      | -0.066477327 | 0.072453223 | 0.442493968 |
| g CAG-460  | g Cladosporium                 | -0.047857603 | 0.196200364 | 0.585259221 |
| g CAG-460  | g Debaryomyces                 | -0.011862199 | 0.748831261 | 0.910387945 |
| g CAG-460  | g Aspergillus                  | 0.047341608  | 0.201072466 | 0.590022167 |
| g CAG-460  | g Kazachstania                 | 0.00840709   | 0.820487808 | 0.937561364 |
| g CAG-460  | g Malassezia                   | -0.001482091 | 0.968090929 | 0.988549475 |
| g CAG-460  | g unclassified Fungi           | 0.003509753  | 0.924528383 | 0.974172444 |
| g CAG-460  | g Mycosphaerella               | 0.051941991  | 0.160646666 | 0.55773065  |
| g CAG-460  | g Simplicillium                | 0.036671379  | 0.322115083 | 0.679081423 |
| g CAG-460  | g unclassified Cordycipitaceae | -0.004004863 | 0.913920595 | 0.971160503 |
| g CAG-460  | g unidentified                 | 0.014742434  | 0.690681145 | 0.892547431 |
| g CAG-582  | g Verticillium                 | 0.01628019   | 0.660340176 | 0.876203103 |
| g CAG-582  | g unclassified Tremellomycetes | -0.042816707 | 0.247605516 | 0.629733759 |
| g CAG-582  | g Candida                      | -0.027158841 | 0.463453214 | 0.769295986 |
| g CAG-582  | g Cladosporium                 | -0.013159273 | 0.722444305 | 0.905687198 |
| g CAG-582  | g Debaryomyces                 | 0.001372785  | 0.970443141 | 0.989137865 |
| g CAG-582  | g Aspergillus                  | -0.018019824 | 0.626677967 | 0.85855855  |
| g CAG-582  | g Kazachstania                 | -0.000876517 | 0.981125529 | 0.993008299 |
| g CAG-582  | g Malassezia                   | 0.039443672  | 0.28686305  | 0.659118154 |
| g CAG-582  | g unclassified Fungi           | -0.042018933 | 0.256533169 | 0.63656207  |
| g CAG-582  | g Mycosphaerella               | 0.042815334  | 0.247620693 | 0.629733759 |
| g CAG-582  | g Simplicillium                | -0.034390958 | 0.353141961 | 0.704818603 |
| g CAG-582  | g unclassified Cordycipitaceae | 0.026957248  | 0.466779878 | 0.772326375 |
| g CAG-582  | g unidentified                 | 0.030242979  | 0.414232967 | 0.742882112 |
| g CAG-1000 | g Verticillium                 | 0.001025554  | 0.977916998 | 0.991604689 |
| g CAG-1000 | g unclassified Tremellomycetes | -0.103890874 | 0.004927989 | 0.138141091 |
| g CAG-1000 | g Candida                      | -0.015674165 | 0.672234449 | 0.881783585 |
| g CAG-1000 | g Cladosporium                 | -0.021795621 | 0.55629748  | 0.82296164  |
| g CAG-1000 | g Debaryomyces                 | -0.094589826 | 0.010503753 | 0.197770706 |
| g CAG-1000 | g Aspergillus                  | 0.100469205  | 0.006555487 | 0.153814109 |
| g CAG-1000 | g Kazachstania                 | 0.00624617   | 0.866118822 | 0.954967619 |

|                   |                                |              |             |             |
|-------------------|--------------------------------|--------------|-------------|-------------|
| g CAG-1000        | g Malassezia                   | 0.04768953   | 0.197777759 | 0.58591995  |
| g CAG-1000        | g unclassified Fungi           | 0.031313702  | 0.39789459  | 0.733284666 |
| g CAG-1000        | g Mycosphaerella               | 0.019703991  | 0.594811208 | 0.844389068 |
| g CAG-1000        | g Simplicillium                | -0.020003265 | 0.589226684 | 0.842189541 |
| g CAG-1000        | g unclassified Cordycipitaceae | 0.016335841  | 0.65925217  | 0.875198403 |
| g CAG-1000        | g unidentified                 | 0.032529772  | 0.379816138 | 0.722533174 |
| g MGYG-HGUT-03951 | g Verticillium                 | -0.02878907  | 0.437041105 | 0.756175438 |
| g MGYG-HGUT-03951 | g unclassified Tremellomycetes | -0.022062306 | 0.551475553 | 0.819847749 |
| g MGYG-HGUT-03951 | g Candida                      | -0.084463368 | 0.022382629 | 0.283321191 |
| g MGYG-HGUT-03951 | g Cladosporium                 | 0.025823154  | 0.485738743 | 0.782411275 |
| g MGYG-HGUT-03951 | g Debaryomyces                 | -0.024449414 | 0.509249654 | 0.798783891 |
| g MGYG-HGUT-03951 | g Aspergillus                  | 0.085688707  | 0.020500206 | 0.275295909 |
| g MGYG-HGUT-03951 | g Kazachstania                 | 0.029702293  | 0.422631712 | 0.746980426 |
| g MGYG-HGUT-03951 | g Malassezia                   | -0.025193247 | 0.49644596  | 0.789024205 |
| g MGYG-HGUT-03951 | g unclassified Fungi           | -0.005297801 | 0.886296044 | 0.96210924  |
| g MGYG-HGUT-03951 | g Mycosphaerella               | 0.029445671  | 0.426652538 | 0.749727648 |
| g MGYG-HGUT-03951 | g Simplicillium                | 0.03189676   | 0.389162945 | 0.7288712   |
| g MGYG-HGUT-03951 | g unclassified Cordycipitaceae | 0.03562774   | 0.336087508 | 0.69124937  |
| g MGYG-HGUT-03951 | g unidentified                 | 0.015777132  | 0.670207678 | 0.881120344 |
| g CAG-776         | g Verticillium                 | 0.015264129  | 0.680329036 | 0.886595465 |
| g CAG-776         | g unclassified Tremellomycetes | -0.03709352  | 0.316572418 | 0.675601669 |
| g CAG-776         | g Candida                      | -0.052474411 | 0.156395274 | 0.553559117 |
| g CAG-776         | g Cladosporium                 | 0.018281374  | 0.621681173 | 0.856123107 |
| g CAG-776         | g Debaryomyces                 | -0.02463331  | 0.506068256 | 0.796409566 |
| g CAG-776         | g Aspergillus                  | -0.000336464 | 0.992754178 | 0.996941403 |
| g CAG-776         | g Kazachstania                 | -0.024234849 | 0.512974812 | 0.800871379 |
| g CAG-776         | g Malassezia                   | -0.03601886  | 0.330806173 | 0.686878237 |
| g CAG-776         | g unclassified Fungi           | 0.00545922   | 0.882856174 | 0.96085406  |
| g CAG-776         | g Mycosphaerella               | -0.035165104 | 0.342404038 | 0.695270538 |
| g CAG-776         | g Simplicillium                | 0.019274996  | 0.602858129 | 0.848214003 |
| g CAG-776         | g unclassified Cordycipitaceae | 0.039664632  | 0.284169721 | 0.658002559 |
| g CAG-776         | g unidentified                 | -0.03118505  | 0.399836981 | 0.734997111 |
| g CAG-302         | g Verticillium                 | 0.01764835   | 0.633804278 | 0.861635763 |
| g CAG-302         | g unclassified Tremellomycetes | -0.100818049 | 0.00636988  | 0.150281798 |
| g CAG-302         | g Candida                      | -0.021023534 | 0.570372149 | 0.831953372 |
| g CAG-302         | g Cladosporium                 | -0.073861411 | 0.045901094 | 0.372462992 |
| g CAG-302         | g Debaryomyces                 | -0.061892936 | 0.094496786 | 0.473692559 |
| g CAG-302         | g Aspergillus                  | 0.078270543  | 0.034359544 | 0.330746506 |
| g CAG-302         | g Kazachstania                 | -0.003653431 | 0.921448605 | 0.973422096 |
| g CAG-302         | g Malassezia                   | -0.00527931  | 0.886690232 | 0.962146211 |
| g CAG-302         | g unclassified Fungi           | 0.016579584  | 0.654495296 | 0.872937805 |
| g CAG-302         | g Mycosphaerella               | -0.011168673 | 0.763063602 | 0.915034792 |
| g CAG-302         | g Simplicillium                | 0.014496958  | 0.695572378 | 0.895089116 |
| g CAG-302         | g unclassified Cordycipitaceae | 0.033330309  | 0.368194863 | 0.716143358 |
| g CAG-302         | g unidentified                 | 0.038574441  | 0.297624791 | 0.666037764 |
| g CAG-1193        | g Verticillium                 | 0.013701189  | 0.711514653 | 0.902091837 |
| g CAG-1193        | g unclassified Tremellomycetes | -0.079917384 | 0.030735065 | 0.31599025  |
| g CAG-1193        | g Candida                      | -0.047581923 | 0.198792521 | 0.586587163 |
| g CAG-1193        | g Cladosporium                 | -0.071030545 | 0.054909425 | 0.400015015 |
| g CAG-1193        | g Debaryomyces                 | -0.06164111  | 0.095848303 | 0.476405236 |
| g CAG-1193        | g Aspergillus                  | 0.088985776  | 0.016103213 | 0.248402621 |
| g CAG-1193        | g Kazachstania                 | 0.033556729  | 0.364948465 | 0.713953478 |
| g CAG-1193        | g Malassezia                   | -0.012065164 | 0.744681915 | 0.909574751 |
| g CAG-1193        | g unclassified Fungi           | -0.011804053 | 0.750021309 | 0.910387945 |
| g CAG-1193        | g Mycosphaerella               | -0.023093261 | 0.533029989 | 0.811490628 |
| g CAG-1193        | g Simplicillium                | 0.040378175  | 0.275589126 | 0.653142958 |
| g CAG-1193        | g unclassified Cordycipitaceae | -0.003770461 | 0.918940911 | 0.971834124 |
| g CAG-1193        | g unidentified                 | -0.001644441 | 0.96459774  | 0.987268912 |
| g Turicibacter    | g Verticillium                 | 0.00589604   | 0.873558668 | 0.95723287  |
| g Turicibacter    | g unclassified Tremellomycetes | -0.012386935 | 0.738118943 | 0.907794719 |
| g Turicibacter    | g Candida                      | -0.012839652 | 0.728917382 | 0.907012052 |
| g Turicibacter    | g Cladosporium                 | -0.019619735 | 0.596387777 | 0.845513549 |
| g Turicibacter    | g Debaryomyces                 | 0.032640342  | 0.37819774  | 0.721666439 |
| g Turicibacter    | g Aspergillus                  | 0.099182514  | 0.007282781 | 0.163622897 |
| g Turicibacter    | g Kazachstania                 | 0.013548829  | 0.714581677 | 0.902925307 |
| g Turicibacter    | g Malassezia                   | -0.013413949 | 0.717300669 | 0.903293001 |
| g Turicibacter    | g unclassified Fungi           | 0.026139475  | 0.480409304 | 0.780189053 |
| g Turicibacter    | g Mycosphaerella               | -0.007172291 | 0.846498532 | 0.947899202 |
| g Turicibacter    | g Simplicillium                | 0.041100114  | 0.267088869 | 0.644840157 |
| g Turicibacter    | g unclassified Cordycipitaceae | -0.013124798 | 0.72314156  | 0.905944398 |
| g Turicibacter    | g unidentified                 | -0.01073792  | 0.771944155 | 0.917900008 |
| g MGYG-HGUT-00374 | g Verticillium                 | -0.037013449 | 0.317618917 | 0.676130231 |
| g MGYG-HGUT-00374 | g unclassified Tremellomycetes | -0.060759301 | 0.10070292  | 0.478858752 |
| g MGYG-HGUT-00374 | g Candida                      | -0.044649665 | 0.227922019 | 0.61316956  |
| g MGYG-HGUT-00374 | g Cladosporium                 | -0.020635199 | 0.577514678 | 0.836262521 |
| g MGYG-HGUT-00374 | g Debaryomyces                 | -0.041695589 | 0.260214386 | 0.638587346 |
| g MGYG-HGUT-00374 | g Aspergillus                  | -0.003628531 | 0.921982256 | 0.973680807 |
| g MGYG-HGUT-00374 | g Kazachstania                 | -0.018175636 | 0.623699175 | 0.8570016   |

|                   |                                |              |             |             |
|-------------------|--------------------------------|--------------|-------------|-------------|
| g MGYG-HGUT-00374 | g Malassezia                   | -0.066985943 | 0.070290564 | 0.439536772 |
| g MGYG-HGUT-00374 | g unclassified Fungi           | -0.014383324 | 0.697840892 | 0.895302916 |
| g MGYG-HGUT-00374 | g Mycosphaerella               | 0.042693864  | 0.248965898 | 0.63134694  |
| g MGYG-HGUT-00374 | g Simplicillium                | -0.011642749 | 0.753325791 | 0.911360936 |
| g MGYG-HGUT-00374 | g unclassified Cordycipitaceae | -0.054021951 | 0.144521578 | 0.539635615 |
| g MGYG-HGUT-00374 | g unidentified                 | 0.007301011  | 0.843778761 | 0.947058427 |
| g CAG-631         | g Verticillium                 | 0.059490612  | 0.108028185 | 0.489838272 |
| g CAG-631         | g unclassified Tremellomycetes | -0.048215018 | 0.192876568 | 0.581782946 |
| g CAG-631         | g Candida                      | -0.03037325  | 0.412224225 | 0.742502435 |
| g CAG-631         | g Cladosporium                 | 0.033685344  | 0.363112358 | 0.713515619 |
| g CAG-631         | g Debaryomyces                 | -0.036659035 | 0.322278105 | 0.679081423 |
| g CAG-631         | g Aspergillus                  | 0.055993567  | 0.130408066 | 0.517804933 |
| g CAG-631         | g Kazachstania                 | 0.005692929  | 0.877879702 | 0.958574313 |
| g CAG-631         | g Malassezia                   | 0.05502938   | 0.13717064  | 0.529179626 |
| g CAG-631         | g unclassified Fungi           | -0.010425758 | 0.778398552 | 0.921057082 |
| g CAG-631         | g Mycosphaerella               | 0.052524462  | 0.15600004  | 0.533299702 |
| g CAG-631         | g Simplicillium                | 0.083879288  | 0.023331516 | 0.2857127   |
| g CAG-631         | g unclassified Cordycipitaceae | 0.081259825  | 0.0280278   | 0.307552108 |
| g CAG-631         | g unidentified                 | 0.051120312  | 0.167377996 | 0.563342385 |
| g UBA7642         | g Verticillium                 | 0.021068094  | 0.569555254 | 0.831953372 |
| g UBA7642         | g unclassified Tremellomycetes | -0.005122607 | 0.890031885 | 0.962904765 |
| g UBA7642         | g Candida                      | -0.019869184 | 0.591725682 | 0.843006984 |
| g UBA7642         | g Cladosporium                 | 0.03408251   | 0.357478923 | 0.708264738 |
| g UBA7642         | g Debaryomyces                 | -0.107050875 | 0.00375894  | 0.121489271 |
| g UBA7642         | g Aspergillus                  | 0.018848018  | 0.610915412 | 0.851291399 |
| g UBA7642         | g Kazachstania                 | -0.035515689 | 0.337610467 | 0.692361927 |
| g UBA7642         | g Malassezia                   | 0.042405274  | 0.252182267 | 0.633802908 |
| g UBA7642         | g unclassified Fungi           | 0.026069052  | 0.481593041 | 0.780189053 |
| g UBA7642         | g Mycosphaerella               | 0.015272518  | 0.680163044 | 0.886538086 |
| g UBA7642         | g Simplicillium                | 0.038476534  | 0.298853599 | 0.666725383 |
| g UBA7642         | g unclassified Cordycipitaceae | 0.02148167   | 0.562000172 | 0.827219568 |
| g UBA7642         | g unidentified                 | 0.014622929  | 0.693060757 | 0.893623606 |
| g CAG-449         | g Verticillium                 | 0.058781308  | 0.112303448 | 0.495371023 |
| g CAG-449         | g unclassified Tremellomycetes | -0.079187568 | 0.032298749 | 0.324736293 |
| g CAG-449         | g Candida                      | -0.004930667 | 0.894127606 | 0.964392857 |
| g CAG-449         | g Cladosporium                 | 0.037846003  | 0.306848202 | 0.670678839 |
| g CAG-449         | g Debaryomyces                 | -0.029689136 | 0.422837314 | 0.746980426 |
| g CAG-449         | g Aspergillus                  | 0.02671122   | 0.47085763  | 0.77381206  |
| g CAG-449         | g Kazachstania                 | 0.031841263  | 0.389898012 | 0.729643515 |
| g CAG-449         | g Malassezia                   | 0.08390131   | 0.023295116 | 0.285641852 |
| g CAG-449         | g unclassified Fungi           | -0.049883625 | 0.177904594 | 0.573729188 |
| g CAG-449         | g Mycosphaerella               | 0.029349347  | 0.428167497 | 0.751263215 |
| g CAG-449         | g Simplicillium                | 0.018892679  | 0.610070406 | 0.851291399 |
| g CAG-449         | g unclassified Cordycipitaceae | 0.054383102  | 0.141852466 | 0.537119624 |
| g CAG-449         | g unidentified                 | -0.022762498 | 0.538913824 | 0.814978906 |
| g UBA4855         | g Verticillium                 | 0.002222658  | 0.952162582 | 0.982634054 |
| g UBA4855         | g unclassified Tremellomycetes | -0.061431413 | 0.096985456 | 0.477459115 |
| g UBA4855         | g Candida                      | -0.062927448 | 0.089103887 | 0.466088645 |
| g UBA4855         | g Cladosporium                 | 0.04098865   | 0.268389391 | 0.645398308 |
| g UBA4855         | g Debaryomyces                 | 0.055473487  | 0.134022988 | 0.522946629 |
| g UBA4855         | g Aspergillus                  | 0.028372748  | 0.443702642 | 0.760859077 |
| g UBA4855         | g Kazachstania                 | -0.001363226 | 0.970648858 | 0.989156993 |
| g UBA4855         | g Malassezia                   | -0.019234086 | 0.603628054 | 0.848736655 |
| g UBA4855         | g unclassified Fungi           | -0.025984843 | 0.483010595 | 0.780449413 |
| g UBA4855         | g Mycosphaerella               | 0.042597377  | 0.250038049 | 0.631737101 |
| g UBA4855         | g Simplicillium                | 0.019379246  | 0.600898147 | 0.847052968 |
| g UBA4855         | g unclassified Cordycipitaceae | -0.012135036 | 0.743255188 | 0.909574751 |
| g UBA4855         | g unidentified                 | 0.000383097  | 0.991749967 | 0.996824777 |
| g RUG131          | g Verticillium                 | 0.040771548  | 0.270934901 | 0.648943668 |
| g RUG131          | g unclassified Tremellomycetes | -0.043860226 | 0.236258694 | 0.620061879 |
| g RUG131          | g Candida                      | -0.071310284 | 0.053958271 | 0.397628223 |
| g RUG131          | g Cladosporium                 | -0.008172096 | 0.825423672 | 0.939308882 |
| g RUG131          | g Debaryomyces                 | -0.046417693 | 0.210015183 | 0.598807697 |
| g RUG131          | g Aspergillus                  | -0.042485866 | 0.251281164 | 0.632257147 |
| g RUG131          | g Kazachstania                 | 0.031931554  | 0.388645602 | 0.728326441 |
| g RUG131          | g Malassezia                   | 0.013572954  | 0.714095731 | 0.902852832 |
| g RUG131          | g unclassified Fungi           | 0.014677466  | 0.691974435 | 0.893134834 |
| g RUG131          | g Mycosphaerella               | 0.075797485  | 0.040483792 | 0.351723717 |
| g RUG131          | g Simplicillium                | 0.068859637  | 0.062774992 | 0.419107235 |
| g RUG131          | g unclassified Cordycipitaceae | 0.047572905  | 0.198877738 | 0.586587163 |
| g RUG131          | g unidentified                 | 0.021012615  | 0.570572398 | 0.831953372 |
| g Gemella         | g Verticillium                 | -0.036824704 | 0.320094674 | 0.677486799 |
| g Gemella         | g unclassified Tremellomycetes | -0.06227597  | 0.092470374 | 0.471664958 |
| g Gemella         | g Candida                      | -0.03436148  | 0.353555    | 0.705388488 |
| g Gemella         | g Cladosporium                 | -0.025338557 | 0.493964873 | 0.787335309 |
| g Gemella         | g Debaryomyces                 | 0.080047915  | 0.030462343 | 0.315608804 |
| g Gemella         | g Aspergillus                  | 0.023005644  | 0.534585406 | 0.812183838 |
| g Gemella         | g Kazachstania                 | 0.025348993  | 0.493786952 | 0.787335309 |

|                   |                                |              |             |             |
|-------------------|--------------------------------|--------------|-------------|-------------|
| g Gemella         | g Malassezia                   | -0.09865234  | 0.00760291  | 0.168194189 |
| g Gemella         | g unclassified Fungi           | 0.043296818  | 0.24233855  | 0.626487849 |
| g Gemella         | g Mycosphaerella               | -0.062341438 | 0.092127531 | 0.471586801 |
| g Gemella         | g Simplicillium                | -0.017769599 | 0.631474489 | 0.860229872 |
| g Gemella         | g unclassified Cordycipitaceae | -0.009925636 | 0.788770995 | 0.925568272 |
| g Gemella         | g unidentified                 | -0.053582013 | 0.147824659 | 0.543295086 |
| g Staphylococcus  | g Verticillium                 | 0.004873965  | 0.895338096 | 0.96495896  |
| g Staphylococcus  | g unclassified Tremellomycetes | -0.069504617 | 0.060346552 | 0.412830947 |
| g Staphylococcus  | g Candida                      | 0.035632703  | 0.336020148 | 0.691245179 |
| g Staphylococcus  | g Cladosporium                 | 0.018497105  | 0.617572767 | 0.854939171 |
| g Staphylococcus  | g Debaryomyces                 | 0.056942012  | 0.124010639 | 0.508632924 |
| g Staphylococcus  | g Aspergillus                  | 0.049983935  | 0.177032856 | 0.572778705 |
| g Staphylococcus  | g Kazachstania                 | 0.000519755  | 0.988807186 | 0.995548313 |
| g Staphylococcus  | g Malassezia                   | -0.003414587 | 0.926568916 | 0.974172444 |
| g Staphylococcus  | g unclassified Fungi           | -0.026775474 | 0.469790776 | 0.773292204 |
| g Staphylococcus  | g Mycosphaerella               | 0.006979464  | 0.850576257 | 0.949250997 |
| g Staphylococcus  | g Simplicillium                | -0.026559772 | 0.473377514 | 0.77526224  |
| g Staphylococcus  | g unclassified Cordycipitaceae | 0.012201082  | 0.741907386 | 0.909480234 |
| g Staphylococcus  | g unidentified                 | -0.061833344 | 0.094815226 | 0.474165747 |
| g CAG-313         | g Verticillium                 | 0.05220192   | 0.15856036  | 0.555039937 |
| g CAG-313         | g unclassified Tremellomycetes | -0.039982999 | 0.280319201 | 0.657094722 |
| g CAG-313         | g Candida                      | -0.066059782 | 0.074269005 | 0.444208845 |
| g CAG-313         | g Cladosporium                 | 0.018602949  | 0.615561414 | 0.853606458 |
| g CAG-313         | g Debaryomyces                 | -0.026715205 | 0.470791441 | 0.77381206  |
| g CAG-313         | g Aspergillus                  | -0.017184579 | 0.642748908 | 0.86622121  |
| g CAG-313         | g Kazachstania                 | -0.050507234 | 0.17253659  | 0.566309615 |
| g CAG-313         | g Malassezia                   | 0.043584031  | 0.239225592 | 0.623263007 |
| g CAG-313         | g unclassified Fungi           | -0.078462671 | 0.033918733 | 0.329183157 |
| g CAG-313         | g Mycosphaerella               | 0.083736858  | 0.023568121 | 0.28635087  |
| g CAG-313         | g Simplicillium                | 0.076599916  | 0.038402609 | 0.344678889 |
| g CAG-313         | g unclassified Cordycipitaceae | 0.058730142  | 0.112616924 | 0.495487035 |
| g CAG-313         | g unidentified                 | -0.016959718 | 0.647104545 | 0.868771923 |
| g UBA1737         | g Verticillium                 | 0.003348414  | 0.927988094 | 0.974599406 |
| g UBA1737         | g unclassified Tremellomycetes | -0.019742685 | 0.59408781  | 0.844183861 |
| g UBA1737         | g Candida                      | -0.099222383 | 0.007259202 | 0.163524696 |
| g UBA1737         | g Cladosporium                 | 0.068409306  | 0.064517914 | 0.423004068 |
| g UBA1737         | g Debaryomyces                 | -0.058118371 | 0.116418555 | 0.500117618 |
| g UBA1737         | g Aspergillus                  | 0.018993159  | 0.60817119  | 0.851291399 |
| g UBA1737         | g Kazachstania                 | -0.011304346 | 0.760272907 | 0.914048031 |
| g UBA1737         | g Malassezia                   | 0.049718322  | 0.179348105 | 0.574257008 |
| g UBA1737         | g unclassified Fungi           | 0.018544476  | 0.61667221  | 0.854506981 |
| g UBA1737         | g Mycosphaerella               | 0.080491287  | 0.029551428 | 0.313165257 |
| g UBA1737         | g Simplicillium                | 0.022536669  | 0.542949605 | 0.816215242 |
| g UBA1737         | g unclassified Cordycipitaceae | 0.090265673  | 0.014633565 | 0.234251137 |
| g UBA1737         | g unidentified                 | 0.040399362  | 0.275337075 | 0.653130896 |
| g Tener-01        | g Verticillium                 | 0.102228907  | 0.005666418 | 0.145538933 |
| g Tener-01        | g unclassified Tremellomycetes | -0.058961688 | 0.111203801 | 0.494471808 |
| g Tener-01        | g Candida                      | -0.06655892  | 0.072102667 | 0.442158914 |
| g Tener-01        | g Cladosporium                 | 0.066308041  | 0.073184979 | 0.443355619 |
| g Tener-01        | g Debaryomyces                 | -0.118517973 | 0.001326385 | 0.070531692 |
| g Tener-01        | g Aspergillus                  | 0.014805011  | 0.689436322 | 0.891576094 |
| g Tener-01        | g Kazachstania                 | -0.117542419 | 0.001454562 | 0.073296059 |
| g Tener-01        | g Malassezia                   | 0.05236588   | 0.157254918 | 0.55423489  |
| g Tener-01        | g unclassified Fungi           | 0.064224984  | 0.082692678 | 0.455217912 |
| g Tener-01        | g Mycosphaerella               | -0.007594209 | 0.837590649 | 0.943982397 |
| g Tener-01        | g Simplicillium                | 0.064172109  | 0.082946438 | 0.455435557 |
| g Tener-01        | g unclassified Cordycipitaceae | 0.100881783  | 0.006336483 | 0.150048656 |
| g Tener-01        | g unidentified                 | 0.008801405  | 0.812221557 | 0.934142805 |
| g MGYG-HGUT-01957 | g Verticillium                 | 0.050912092  | 0.169116881 | 0.563848296 |
| g MGYG-HGUT-01957 | g unclassified Tremellomycetes | -0.10388107  | 0.004932078 | 0.138141091 |
| g MGYG-HGUT-01957 | g Candida                      | -0.048097641 | 0.193963537 | 0.582937277 |
| g MGYG-HGUT-01957 | g Cladosporium                 | 0.059598442  | 0.107389663 | 0.488773081 |
| g MGYG-HGUT-01957 | g Debaryomyces                 | -0.034283258 | 0.354652502 | 0.70583652  |
| g MGYG-HGUT-01957 | g Aspergillus                  | 0.065192656  | 0.078158496 | 0.450222934 |
| g MGYG-HGUT-01957 | g Kazachstania                 | -0.051365201 | 0.165350068 | 0.562434723 |
| g MGYG-HGUT-01957 | g Malassezia                   | 0.047879934  | 0.195991475 | 0.585259221 |
| g MGYG-HGUT-01957 | g unclassified Fungi           | -0.033685673 | 0.363107661 | 0.713515619 |
| g MGYG-HGUT-01957 | g Mycosphaerella               | 0.061586507  | 0.096143375 | 0.476752199 |
| g MGYG-HGUT-01957 | g Simplicillium                | -0.038202759 | 0.302307636 | 0.668551599 |
| g MGYG-HGUT-01957 | g unclassified Cordycipitaceae | 0.049807719  | 0.178566371 | 0.574168743 |
| g MGYG-HGUT-01957 | g unidentified                 | 0.001989374  | 0.957178375 | 0.984723077 |
| g UBA7004         | g Verticillium                 | 0.011787867  | 0.750352707 | 0.910387945 |
| g UBA7004         | g unclassified Tremellomycetes | -0.049252993 | 0.183458242 | 0.575758478 |
| g UBA7004         | g Candida                      | -0.057428052 | 0.120828325 | 0.505177927 |
| g UBA7004         | g Cladosporium                 | 0.048606141  | 0.189286828 | 0.579369719 |
| g UBA7004         | g Debaryomyces                 | -0.034652367 | 0.349492511 | 0.701637213 |
| g UBA7004         | g Aspergillus                  | 0.027696484  | 0.454645898 | 0.765814499 |
| g UBA7004         | g Kazachstania                 | -0.064569627 | 0.081053995 | 0.452126167 |



|                 |                                |              |             |             |
|-----------------|--------------------------------|--------------|-------------|-------------|
| g UBA7004       | g Malassezia                   | 0.014980083  | 0.685958127 | 0.889341938 |
| g UBA7004       | g unclassified Fungi           | 0.003831581  | 0.917631557 | 0.971437239 |
| g UBA7004       | g Mycosphaerella               | -0.023713505 | 0.522084765 | 0.805467412 |
| g UBA7004       | g Simplicillium                | 0.043665043  | 0.23835265  | 0.622892944 |
| g UBA7004       | g unclassified Cordycipitaceae | 0.052052946  | 0.159753571 | 0.556643823 |
| g UBA7004       | g unidentified                 | 0.010346429  | 0.780041262 | 0.921371303 |
| g CAG-307       | g Verticillium                 | 0.04402014   | 0.234552815 | 0.618962066 |
| g CAG-307       | g unclassified Tremellomycetes | -0.063987801 | 0.083835903 | 0.457294603 |
| g CAG-307       | g Candida                      | -0.018874004 | 0.610423687 | 0.851291399 |
| g CAG-307       | g Cladosporium                 | 0.054074799  | 0.144128616 | 0.538704729 |
| g CAG-307       | g Debaryomyces                 | -0.072257207 | 0.050839881 | 0.386485359 |
| g CAG-307       | g Aspergillus                  | 0.008073804  | 0.827490261 | 0.939989934 |
| g CAG-307       | g Kazachstania                 | 0.031111605  | 0.400948402 | 0.735790931 |
| g CAG-307       | g Malassezia                   | 0.04770078   | 0.197671895 | 0.58591995  |
| g CAG-307       | g unclassified Fungi           | -0.053070127 | 0.151740029 | 0.548993338 |
| g CAG-307       | g Mycosphaerella               | 0.01884914   | 0.61089419  | 0.851291399 |
| g CAG-307       | g Simplicillium                | 0.051674278  | 0.162817012 | 0.560736054 |
| g CAG-307       | g unclassified Cordycipitaceae | 0.034727766  | 0.348444346 | 0.700197127 |
| g CAG-307       | g unidentified                 | -0.01927267  | 0.602901896 | 0.848214003 |
| g FJAT-21963    | g Verticillium                 | 0.03764412   | 0.309437515 | 0.672075778 |
| g FJAT-21963    | g unclassified Tremellomycetes | -0.001931979 | 0.958412674 | 0.984847119 |
| g FJAT-21963    | g Candida                      | -0.00282513  | 0.939218204 | 0.978000513 |
| g FJAT-21963    | g Cladosporium                 | 0.007869875  | 0.83178169  | 0.941179837 |
| g FJAT-21963    | g Debaryomyces                 | -0.002535238 | 0.945444883 | 0.980291673 |
| g FJAT-21963    | g Aspergillus                  | -0.014560528 | 0.694304491 | 0.894487847 |
| g FJAT-21963    | g Kazachstania                 | 0.037182063  | 0.315417832 | 0.675194937 |
| g FJAT-21963    | g Malassezia                   | 0.020957535  | 0.571583068 | 0.832602552 |
| g FJAT-21963    | g unclassified Fungi           | -0.009503562 | 0.797553984 | 0.929381815 |
| g FJAT-21963    | g Mycosphaerella               | 0.020790114  | 0.574660336 | 0.834736537 |
| g FJAT-21963    | g Simplicillium                | -0.014493804 | 0.695635314 | 0.895089116 |
| g FJAT-21963    | g unclassified Cordycipitaceae | 0.043523995  | 0.239873952 | 0.623365954 |
| g FJAT-21963    | g unidentified                 | -0.041580146 | 0.261537489 | 0.639461577 |
| g Collinsella   | g Verticillium                 | -0.057590522 | 0.119778904 | 0.503176006 |
| g Collinsella   | g unclassified Tremellomycetes | 0.064468075  | 0.081534092 | 0.452919383 |
| g Collinsella   | g Candida                      | -0.021569476 | 0.56040241  | 0.826390511 |
| g Collinsella   | g Cladosporium                 | 0.029938738  | 0.418946704 | 0.745091432 |
| g Collinsella   | g Debaryomyces                 | -0.077067991 | 0.037231053 | 0.341376127 |
| g Collinsella   | g Aspergillus                  | 0.059812681  | 0.106129878 | 0.486808137 |
| g Collinsella   | g Kazachstania                 | -0.056370668 | 0.12783451  | 0.51521926  |
| g Collinsella   | g Malassezia                   | -0.026633667 | 0.472147091 | 0.774373917 |
| g Collinsella   | g unclassified Fungi           | 0.05745128   | 0.120677853 | 0.505147562 |
| g Collinsella   | g Mycosphaerella               | 0.005309745  | 0.886041436 | 0.96210924  |
| g Collinsella   | g Simplicillium                | 0.040260935  | 0.276986731 | 0.654270214 |
| g Collinsella   | g unclassified Cordycipitaceae | -0.026206613 | 0.479282243 | 0.780189053 |
| g Collinsella   | g unidentified                 | 0.032436661  | 0.381182268 | 0.723098466 |
| g Enorma        | g Verticillium                 | -0.00902976  | 0.807443901 | 0.933092485 |
| g Enorma        | g unclassified Tremellomycetes | -0.017354586 | 0.63946394  | 0.86388896  |
| g Enorma        | g Candida                      | -0.061184528 | 0.098338051 | 0.477955684 |
| g Enorma        | g Cladosporium                 | -0.037047545 | 0.317173023 | 0.675963115 |
| g Enorma        | g Debaryomyces                 | -0.050992562 | 0.168443266 | 0.563459023 |
| g Enorma        | g Aspergillus                  | 0.064948519  | 0.079282939 | 0.45101344  |
| g Enorma        | g Kazachstania                 | -0.033822754 | 0.36115707  | 0.711747526 |
| g Enorma        | g Malassezia                   | 0.01804951   | 0.626109968 | 0.8579572   |
| g Enorma        | g unclassified Fungi           | 0.023066103  | 0.533511865 | 0.811502452 |
| g Enorma        | g Mycosphaerella               | 0.012552338  | 0.734752664 | 0.907315107 |
| g Enorma        | g Simplicillium                | 0.021171142  | 0.567668284 | 0.830492386 |
| g Enorma        | g unclassified Cordycipitaceae | 0.0123982    | 0.737889506 | 0.907794719 |
| g Enorma        | g unidentified                 | 0.057381631  | 0.121129484 | 0.505823928 |
| g Eggerthella   | g Verticillium                 | 0.003406382  | 0.92674487  | 0.974172444 |
| g Eggerthella   | g unclassified Tremellomycetes | 0.068912976  | 0.062571154 | 0.418274134 |
| g Eggerthella   | g Candida                      | 0.042149985  | 0.255051493 | 0.635347198 |
| g Eggerthella   | g Cladosporium                 | 0.043746539  | 0.237476767 | 0.622024542 |
| g Eggerthella   | g Debaryomyces                 | -0.02097504  | 0.571261785 | 0.832313398 |
| g Eggerthella   | g Aspergillus                  | 0.043120208  | 0.244266794 | 0.627995923 |
| g Eggerthella   | g Kazachstania                 | -0.029407414 | 0.427253856 | 0.750033229 |
| g Eggerthella   | g Malassezia                   | 0.025483558  | 0.491495691 | 0.785532004 |
| g Eggerthella   | g unclassified Fungi           | 0.005005451  | 0.892531484 | 0.963948577 |
| g Eggerthella   | g Mycosphaerella               | -0.048414892 | 0.191035933 | 0.580402598 |
| g Eggerthella   | g Simplicillium                | 0.022571823  | 0.542320379 | 0.816215242 |
| g Eggerthella   | g unclassified Cordycipitaceae | 0.009139893  | 0.805142217 | 0.931596653 |
| g Eggerthella   | g unidentified                 | -0.050963007 | 0.168690437 | 0.563848296 |
| g Gordonibacter | g Verticillium                 | 0.007220775  | 0.845473889 | 0.947820248 |
| g Gordonibacter | g unclassified Tremellomycetes | 0.051743429  | 0.162254304 | 0.560004909 |
| g Gordonibacter | g Candida                      | 0.003916983  | 0.91580239  | 0.971437239 |
| g Gordonibacter | g Cladosporium                 | 0.063756384  | 0.084963612 | 0.459591722 |
| g Gordonibacter | g Debaryomyces                 | -0.070317226 | 0.057398121 | 0.407303341 |
| g Gordonibacter | g Aspergillus                  | 0.0675365    | 0.068009442 | 0.435112406 |
| g Gordonibacter | g Kazachstania                 | -0.044133302 | 0.233350935 | 0.617638717 |

|                   |                                |              |             |             |
|-------------------|--------------------------------|--------------|-------------|-------------|
| g Gordonibacter   | g Malassezia                   | 0.033703745  | 0.362850136 | 0.713429978 |
| g Gordonibacter   | g unclassified Fungi           | 0.065535618  | 0.076600805 | 0.447098575 |
| g Gordonibacter   | g Mycosphaerella               | -0.019624996 | 0.596289285 | 0.84549554  |
| g Gordonibacter   | g Simplicillium                | 0.053825518  | 0.145989366 | 0.540957635 |
| g Gordonibacter   | g unclassified Cordycipitaceae | 0.034855989  | 0.346666427 | 0.697873429 |
| g Gordonibacter   | g unidentified                 | 0.013525411  | 0.715053491 | 0.902925307 |
| g CAG-1427        | g Verticillium                 | 0.02731239   | 0.460928232 | 0.769075712 |
| g CAG-1427        | g unclassified Tremellomycetes | -0.01738327  | 0.638910378 | 0.86388896  |
| g CAG-1427        | g Candida                      | -0.033777591 | 0.361798998 | 0.712636475 |
| g CAG-1427        | g Cladosporium                 | -0.022532122 | 0.54303102  | 0.816215242 |
| g CAG-1427        | g Debaryomyces                 | -0.07798766  | 0.035017464 | 0.333329108 |
| g CAG-1427        | g Aspergillus                  | 0.075070835  | 0.04245     | 0.358790655 |
| g CAG-1427        | g Kazachstania                 | -0.089123106 | 0.015939554 | 0.247904256 |
| g CAG-1427        | g Malassezia                   | 0.05538369   | 0.134654894 | 0.523870674 |
| g CAG-1427        | g unclassified Fungi           | 0.048651082  | 0.188877531 | 0.579084988 |
| g CAG-1427        | g Mycosphaerella               | 0.01865965   | 0.614485109 | 0.853048096 |
| g CAG-1427        | g Simplicillium                | 0.075371269  | 0.041627508 | 0.356023296 |
| g CAG-1427        | g unclassified Cordycipitaceae | 0.054638601  | 0.139987123 | 0.533896229 |
| g CAG-1427        | g unidentified                 | 0.054672835  | 0.139738631 | 0.533896229 |
| g Adlercreutzia   | g Verticillium                 | 0.035589786  | 0.336602871 | 0.691502927 |
| g Adlercreutzia   | g unclassified Tremellomycetes | 0.050774276  | 0.170275222 | 0.564916697 |
| g Adlercreutzia   | g Candida                      | -0.052317034 | 0.157642976 | 0.55423489  |
| g Adlercreutzia   | g Cladosporium                 | 0.045394288  | 0.220252303 | 0.607083027 |
| g Adlercreutzia   | g Debaryomyces                 | -0.113784456 | 0.002062105 | 0.086249781 |
| g Adlercreutzia   | g Aspergillus                  | 0.090279888  | 0.014617928 | 0.234251137 |
| g Adlercreutzia   | g Kazachstania                 | -0.064145554 | 0.083074118 | 0.455435557 |
| g Adlercreutzia   | g Malassezia                   | -0.022011381 | 0.552394739 | 0.820336555 |
| g Adlercreutzia   | g unclassified Fungi           | 0.087649051  | 0.017774809 | 0.259081312 |
| g Adlercreutzia   | g Mycosphaerella               | -0.003612029 | 0.922335961 | 0.973795648 |
| g Adlercreutzia   | g Simplicillium                | 0.016495766  | 0.656129509 | 0.873903394 |
| g Adlercreutzia   | g unclassified Cordycipitaceae | 0.033030119  | 0.372526545 | 0.718177427 |
| g Adlercreutzia   | g unidentified                 | 0.042773195  | 0.248086782 | 0.630464535 |
| g Slackia A       | g Verticillium                 | 0.04250484   | 0.251069336 | 0.632257147 |
| g Slackia A       | g unclassified Tremellomycetes | 0.027974882  | 0.450122614 | 0.763577767 |
| g Slackia A       | g Candida                      | -0.063855024 | 0.084481446 | 0.458565103 |
| g Slackia A       | g Cladosporium                 | 0.068095307  | 0.065756621 | 0.426650858 |
| g Slackia A       | g Debaryomyces                 | -0.134480744 | 0.000266032 | 0.027872801 |
| g Slackia A       | g Aspergillus                  | 0.047013043  | 0.204220376 | 0.593697806 |
| g Slackia A       | g Kazachstania                 | -0.076509405 | 0.038632722 | 0.345208531 |
| g Slackia A       | g Malassezia                   | 0.057760798  | 0.118686724 | 0.502487018 |
| g Slackia A       | g unclassified Fungi           | 0.014340028  | 0.698705937 | 0.895555503 |
| g Slackia A       | g Mycosphaerella               | 0.025648216  | 0.488699791 | 0.783941094 |
| g Slackia A       | g Simplicillium                | 0.044039767  | 0.234344045 | 0.618719731 |
| g Slackia A       | g unclassified Cordycipitaceae | 0.073156583  | 0.048018985 | 0.378604998 |
| g Slackia A       | g unidentified                 | 0.014518528  | 0.695142073 | 0.894923341 |
| g MGYG-HGUT-01153 | g Verticillium                 | 0.013291138  | 0.719779475 | 0.904919378 |
| g MGYG-HGUT-01153 | g unclassified Tremellomycetes | -0.098938203 | 0.007428769 | 0.166549233 |
| g MGYG-HGUT-01153 | g Candida                      | 0.039624453  | 0.284658192 | 0.658096791 |
| g MGYG-HGUT-01153 | g Cladosporium                 | -0.048219976 | 0.192830757 | 0.581782946 |
| g MGYG-HGUT-01153 | g Debaryomyces                 | -0.022484757 | 0.543879438 | 0.816215242 |
| g MGYG-HGUT-01153 | g Aspergillus                  | 0.002473067  | 0.946780713 | 0.980691059 |
| g MGYG-HGUT-01153 | g Kazachstania                 | -0.054913153 | 0.138003734 | 0.530845333 |
| g MGYG-HGUT-01153 | g Malassezia                   | -0.014818322 | 0.689171645 | 0.891576094 |
| g MGYG-HGUT-01153 | g unclassified Fungi           | 0.033859949  | 0.360628945 | 0.711747526 |
| g MGYG-HGUT-01153 | g Mycosphaerella               | 0.020628166  | 0.577644432 | 0.836262521 |
| g MGYG-HGUT-01153 | g Simplicillium                | 0.049425085  | 0.181930158 | 0.575010893 |
| g MGYG-HGUT-01153 | g unclassified Cordycipitaceae | -0.00891066  | 0.809934831 | 0.933584001 |
| g MGYG-HGUT-01153 | g unidentified                 | 0.091798477  | 0.01302981  | 0.221742805 |
| g MGYG-HGUT-03089 | g Verticillium                 | -0.018480229 | 0.617893727 | 0.855065241 |
| g MGYG-HGUT-03089 | g unclassified Tremellomycetes | 0.042866939  | 0.247050741 | 0.629733759 |
| g MGYG-HGUT-03089 | g Candida                      | -0.01887548  | 0.610395766 | 0.851291399 |
| g MGYG-HGUT-03089 | g Cladosporium                 | 0.028814007  | 0.436643917 | 0.755981115 |
| g MGYG-HGUT-03089 | g Debaryomyces                 | -0.054914539 | 0.137993781 | 0.530845333 |
| g MGYG-HGUT-03089 | g Aspergillus                  | 0.038648016  | 0.29670358  | 0.6653353   |
| g MGYG-HGUT-03089 | g Kazachstania                 | -0.077034875 | 0.037312932 | 0.341376127 |
| g MGYG-HGUT-03089 | g Malassezia                   | -0.001182898 | 0.974530018 | 0.990490577 |
| g MGYG-HGUT-03089 | g unclassified Fungi           | 0.061483766  | 0.09670055  | 0.477459115 |
| g MGYG-HGUT-03089 | g Mycosphaerella               | -0.032520249 | 0.379955711 | 0.722551797 |
| g MGYG-HGUT-03089 | g Simplicillium                | -0.001244076 | 0.973213222 | 0.990420721 |
| g MGYG-HGUT-03089 | g unclassified Cordycipitaceae | -0.003950549 | 0.915083582 | 0.97135264  |
| g MGYG-HGUT-03089 | g unidentified                 | 0.040281424  | 0.276742137 | 0.654133065 |
| g MGYG-HGUT-02957 | g Verticillium                 | -0.001320763 | 0.97156272  | 0.989767997 |
| g MGYG-HGUT-02957 | g unclassified Tremellomycetes | 0.064865776  | 0.079667    | 0.45101344  |
| g MGYG-HGUT-02957 | g Candida                      | 0.03212556   | 0.385768568 | 0.725854015 |
| g MGYG-HGUT-02957 | g Cladosporium                 | 0.030065092  | 0.416985237 | 0.744290485 |
| g MGYG-HGUT-02957 | g Debaryomyces                 | -0.041155685 | 0.266442104 | 0.644684802 |
| g MGYG-HGUT-02957 | g Aspergillus                  | 0.069965797  | 0.058658223 | 0.410258636 |
| g MGYG-HGUT-02957 | g Kazachstania                 | -0.059213039 | 0.109685658 | 0.492584069 |

|                    |                                |              |             |             |
|--------------------|--------------------------------|--------------|-------------|-------------|
| g MGYG-HGUT-02957  | g Malassezia                   | -0.012834875 | 0.729014264 | 0.907012052 |
| g MGYG-HGUT-02957  | g unclassified Fungi           | 0.00510619   | 0.890382075 | 0.962904765 |
| g MGYG-HGUT-02957  | g Mycosphaerella               | -0.021651427 | 0.558913148 | 0.824999154 |
| g MGYG-HGUT-02957  | g Simplicillium                | 0.044429066  | 0.230230257 | 0.615133665 |
| g MGYG-HGUT-02957  | g unclassified Cordycipitaceae | -0.018246148 | 0.622353144 | 0.856123107 |
| g MGYG-HGUT-02957  | g unidentified                 | -0.008916054 | 0.809821977 | 0.933584001 |
| g Senegalimassilia | g Verticillium                 | -0.03572516  | 0.334766995 | 0.690008638 |
| g Senegalimassilia | g unclassified Tremellomycetes | 0.061129058  | 0.098644011 | 0.477955684 |
| g Senegalimassilia | g Candida                      | 0.048846264  | 0.187107462 | 0.577661122 |
| g Senegalimassilia | g Cladosporium                 | 0.031935323  | 0.38858958  | 0.728326441 |
| g Senegalimassilia | g Debaryomyces                 | -0.004516851 | 0.902967301 | 0.966636316 |
| g Senegalimassilia | g Aspergillus                  | 0.026133698  | 0.480506347 | 0.780189053 |
| g Senegalimassilia | g Kazachstania                 | -0.072379033 | 0.050449846 | 0.386038256 |
| g Senegalimassilia | g Malassezia                   | 0.029148119  | 0.431342424 | 0.753212133 |
| g Senegalimassilia | g unclassified Fungi           | 0.011834031  | 0.749407697 | 0.910387945 |
| g Senegalimassilia | g Mycosphaerella               | 0.034329052  | 0.354009717 | 0.705388488 |
| g Senegalimassilia | g Simplicillium                | 0.023308503  | 0.529218605 | 0.810095657 |
| g Senegalimassilia | g unclassified Cordycipitaceae | -0.008422761 | 0.820158894 | 0.937552275 |
| g Senegalimassilia | g unidentified                 | 0.039973755  | 0.280430504 | 0.657094722 |
| g Arabia           | g Verticillium                 | 0.009760784  | 0.792198294 | 0.926965257 |
| g Arabia           | g unclassified Tremellomycetes | 0.063368996  | 0.08687875  | 0.463850116 |
| g Arabia           | g Candida                      | 0.031374807  | 0.396974014 | 0.732625333 |
| g Arabia           | g Cladosporium                 | 0.046101248  | 0.213143191 | 0.600680647 |
| g Arabia           | g Debaryomyces                 | -0.079090063 | 0.032512725 | 0.325188715 |
| g Arabia           | g Aspergillus                  | 0.075626923  | 0.040938249 | 0.354132002 |
| g Arabia           | g Kazachstania                 | -0.042731407 | 0.248549589 | 0.63117969  |
| g Arabia           | g Malassezia                   | 0.041641063  | 0.260838738 | 0.638638484 |
| g Arabia           | g unclassified Fungi           | 0.033102986  | 0.371472201 | 0.717854628 |
| g Arabia           | g Mycosphaerella               | -0.038597738 | 0.297332884 | 0.665940424 |
| g Arabia           | g Simplicillium                | 0.086456143  | 0.019392732 | 0.268956611 |
| g Arabia           | g unclassified Cordycipitaceae | 0.032528239  | 0.379838598 | 0.722533174 |
| g Arabia           | g unidentified                 | 0.028515453  | 0.441412732 | 0.75910048  |
| g Rubneribacter    | g Verticillium                 | 0.032125904  | 0.385763483 | 0.725854015 |
| g Rubneribacter    | g unclassified Tremellomycetes | 0.019316752  | 0.602072733 | 0.84782554  |
| g Rubneribacter    | g Candida                      | 0.009303435  | 0.801727485 | 0.930555602 |
| g Rubneribacter    | g Cladosporium                 | 0.042492335  | 0.251208926 | 0.632257147 |
| g Rubneribacter    | g Debaryomyces                 | -0.071399498 | 0.053657832 | 0.397098662 |
| g Rubneribacter    | g Aspergillus                  | 0.078874917  | 0.032989157 | 0.326253512 |
| g Rubneribacter    | g Kazachstania                 | -0.079551627 | 0.031510424 | 0.320310572 |
| g Rubneribacter    | g Malassezia                   | 0.077236197  | 0.036817529 | 0.340172772 |
| g Rubneribacter    | g unclassified Fungi           | 0.036260951  | 0.327564187 | 0.68301167  |
| g Rubneribacter    | g Mycosphaerella               | -0.026305112 | 0.477631356 | 0.779382422 |
| g Rubneribacter    | g Simplicillium                | 0.062428111  | 0.091675205 | 0.470392034 |
| g Rubneribacter    | g unclassified Cordycipitaceae | 0.05590128   | 0.131043957 | 0.518395197 |
| g Rubneribacter    | g unidentified                 | 0.05262183   | 0.155233323 | 0.552672864 |
| g Enteroscipio     | g Verticillium                 | -0.007022034 | 0.849675691 | 0.948917865 |
| g Enteroscipio     | g unclassified Tremellomycetes | 0.019147699  | 0.605255286 | 0.849782598 |
| g Enteroscipio     | g Candida                      | 0.036335659  | 0.326567894 | 0.682413399 |
| g Enteroscipio     | g Cladosporium                 | 0.020083963  | 0.58772499  | 0.841470145 |
| g Enteroscipio     | g Debaryomyces                 | -0.056320374 | 0.12817545  | 0.51521926  |
| g Enteroscipio     | g Aspergillus                  | 0.08337924   | 0.02417138  | 0.289683947 |
| g Enteroscipio     | g Kazachstania                 | -0.030268498 | 0.413839021 | 0.742811081 |
| g Enteroscipio     | g Malassezia                   | 0.044343683  | 0.231128096 | 0.616380421 |
| g Enteroscipio     | g unclassified Fungi           | -0.012934797 | 0.726988434 | 0.907012052 |
| g Enteroscipio     | g Mycosphaerella               | -0.024991296 | 0.49990515  | 0.791370491 |
| g Enteroscipio     | g Simplicillium                | 0.102497072  | 0.005540906 | 0.144063562 |
| g Enteroscipio     | g unclassified Cordycipitaceae | 0.015709481  | 0.671539038 | 0.881665769 |
| g Enteroscipio     | g unidentified                 | 0.032825947  | 0.375490629 | 0.719866895 |
| g Phoenicibacter   | g Verticillium                 | -0.040075662 | 0.279205167 | 0.656450724 |
| g Phoenicibacter   | g unclassified Tremellomycetes | 0.039566727  | 0.285360996 | 0.658617299 |
| g Phoenicibacter   | g Candida                      | -0.06364949  | 0.08548863  | 0.460376939 |
| g Phoenicibacter   | g Cladosporium                 | 0.024795984  | 0.50326272  | 0.794498896 |
| g Phoenicibacter   | g Debaryomyces                 | -0.097495381 | 0.008345584 | 0.17418732  |
| g Phoenicibacter   | g Aspergillus                  | 0.058026451  | 0.116998359 | 0.500949117 |
| g Phoenicibacter   | g Kazachstania                 | -0.077538403 | 0.03608438  | 0.337675685 |
| g Phoenicibacter   | g Malassezia                   | -0.006723518 | 0.855994926 | 0.950786009 |
| g Phoenicibacter   | g unclassified Fungi           | 0.009398907  | 0.79973577  | 0.929905946 |
| g Phoenicibacter   | g Mycosphaerella               | -0.024742198 | 0.504189426 | 0.795013039 |
| g Phoenicibacter   | g Simplicillium                | 0.053900657  | 0.145426568 | 0.540957635 |
| g Phoenicibacter   | g unclassified Cordycipitaceae | 0.019499288  | 0.598644847 | 0.846523771 |
| g Phoenicibacter   | g unidentified                 | 0.037643784  | 0.309441826 | 0.672075778 |
| g Lancefieldella   | g Verticillium                 | -0.088875099 | 0.016236181 | 0.249725676 |
| g Lancefieldella   | g unclassified Tremellomycetes | 0.032943093  | 0.373788168 | 0.718484102 |
| g Lancefieldella   | g Candida                      | 0.049483578  | 0.181412918 | 0.575010893 |
| g Lancefieldella   | g Cladosporium                 | 0.000667526  | 0.985625264 | 0.994269451 |
| g Lancefieldella   | g Debaryomyces                 | 0.013385689  | 0.717870813 | 0.903593308 |
| g Lancefieldella   | g Aspergillus                  | 0.030278307  | 0.413687647 | 0.742811081 |
| g Lancefieldella   | g Kazachstania                 | 0.056253355  | 0.128630859 | 0.515954465 |

|                   |                                |              |             |             |
|-------------------|--------------------------------|--------------|-------------|-------------|
| g Lancefieldella  | g Malassezia                   | 0.00460591   | 0.901063812 | 0.966260363 |
| g Lancefieldella  | g unclassified Fungi           | -0.022781123 | 0.538581654 | 0.814978906 |
| g Lancefieldella  | g Mycosphaerella               | -0.026686343 | 0.471271049 | 0.77381206  |
| g Lancefieldella  | g Simplicillium                | -0.054015019 | 0.144573181 | 0.539637882 |
| g Lancefieldella  | g unclassified Cordycipitaceae | -0.064605647 | 0.08088426  | 0.452126167 |
| g Lancefieldella  | g unidentified                 | -0.044121501 | 0.233476072 | 0.617660948 |
| g Olsenella E     | g Verticillium                 | 0.034538145  | 0.351084181 | 0.703126667 |
| g Olsenella E     | g unclassified Tremellomycetes | 0.046440292  | 0.209793063 | 0.598807697 |
| g Olsenella E     | g Candida                      | 0.01084394   | 0.769755594 | 0.917270973 |
| g Olsenella E     | g Cladosporium                 | 0.026547907  | 0.473575258 | 0.775272518 |
| g Olsenella E     | g Debaryomyces                 | -0.052967571 | 0.152533868 | 0.549189615 |
| g Olsenella E     | g Aspergillus                  | 0.060624397  | 0.101462557 | 0.4799628   |
| g Olsenella E     | g Kazachstania                 | -0.049099345 | 0.184830552 | 0.576342405 |
| g Olsenella E     | g Malassezia                   | 0.039364452  | 0.287832856 | 0.659362601 |
| g Olsenella E     | g unclassified Fungi           | 0.064850669  | 0.079737283 | 0.45101344  |
| g Olsenella E     | g Mycosphaerella               | -0.031123385 | 0.400770015 | 0.735790931 |
| g Olsenella E     | g Simplicillium                | 0.035506121  | 0.337740717 | 0.692361927 |
| g Olsenella E     | g unclassified Cordycipitaceae | 0.04179897   | 0.259033472 | 0.637931914 |
| g Olsenella E     | g unidentified                 | 0.01205665   | 0.744855837 | 0.909574751 |
| g MGYG-HGUT-00819 | g Verticillium                 | 0.02674625   | 0.470275833 | 0.773582911 |
| g MGYG-HGUT-00819 | g unclassified Tremellomycetes | -0.064629502 | 0.080772008 | 0.452126167 |
| g MGYG-HGUT-00819 | g Candida                      | 0.00173878   | 0.962568217 | 0.986228955 |
| g MGYG-HGUT-00819 | g Cladosporium                 | 0.04541576   | 0.220033913 | 0.607083027 |
| g MGYG-HGUT-00819 | g Debaryomyces                 | -0.089079928 | 0.015990851 | 0.248116115 |
| g MGYG-HGUT-00819 | g Aspergillus                  | 0.048600409  | 0.189339079 | 0.579369719 |
| g MGYG-HGUT-00819 | g Kazachstania                 | -0.082327968 | 0.026022718 | 0.299643528 |
| g MGYG-HGUT-00819 | g Malassezia                   | 0.044673712  | 0.227671398 | 0.612967811 |
| g MGYG-HGUT-00819 | g unclassified Fungi           | 0.103469832  | 0.005106354 | 0.138908586 |
| g MGYG-HGUT-00819 | g Mycosphaerella               | 0.015828144  | 0.669204435 | 0.880657424 |
| g MGYG-HGUT-00819 | g Simplicillium                | -0.019840289 | 0.592264864 | 0.843305185 |
| g MGYG-HGUT-00819 | g unclassified Cordycipitaceae | 0.027425068  | 0.459080251 | 0.768182671 |
| g MGYG-HGUT-00819 | g unidentified                 | 0.061977069  | 0.094048671 | 0.473239676 |
| g QAMH01          | g Verticillium                 | 0.028499224  | 0.441672808 | 0.75910048  |
| g QAMH01          | g unclassified Tremellomycetes | -0.002991761 | 0.935640742 | 0.977250783 |
| g QAMH01          | g Candida                      | -0.006462606 | 0.861525695 | 0.953015155 |
| g QAMH01          | g Cladosporium                 | 0.029699779  | 0.422670992 | 0.746980426 |
| g QAMH01          | g Debaryomyces                 | -0.090967349 | 0.013879031 | 0.22770218  |
| g QAMH01          | g Aspergillus                  | 0.012871176  | 0.728278073 | 0.907012052 |
| g QAMH01          | g Kazachstania                 | -0.076834283 | 0.037812154 | 0.342575529 |
| g QAMH01          | g Malassezia                   | -0.012608051 | 0.733619946 | 0.907315107 |
| g QAMH01          | g unclassified Fungi           | 0.025359534  | 0.493607261 | 0.787242206 |
| g QAMH01          | g Mycosphaerella               | 0.016581719  | 0.654453681 | 0.872937805 |
| g QAMH01          | g Simplicillium                | -0.006333681 | 0.864261135 | 0.953959668 |
| g QAMH01          | g unclassified Cordycipitaceae | 0.060275924  | 0.103445879 | 0.483295494 |
| g QAMH01          | g unidentified                 | 0.025874806  | 0.484866327 | 0.781546911 |
| g MGYG-HGUT-00585 | g Verticillium                 | 0.04397955   | 0.234984986 | 0.619373537 |
| g MGYG-HGUT-00585 | g unclassified Tremellomycetes | -0.012029643 | 0.74540757  | 0.909574751 |
| g MGYG-HGUT-00585 | g Candida                      | -0.007526292 | 0.839023204 | 0.944525909 |
| g MGYG-HGUT-00585 | g Cladosporium                 | 0.047422963  | 0.200298501 | 0.588602815 |
| g MGYG-HGUT-00585 | g Debaryomyces                 | -0.091770456 | 0.013057676 | 0.221791854 |
| g MGYG-HGUT-00585 | g Aspergillus                  | 0.018919947  | 0.609554738 | 0.851291399 |
| g MGYG-HGUT-00585 | g Kazachstania                 | -0.064949386 | 0.079278922 | 0.45101344  |
| g MGYG-HGUT-00585 | g Malassezia                   | 0.033198243  | 0.370096676 | 0.71692327  |
| g MGYG-HGUT-00585 | g unclassified Fungi           | 0.047322587  | 0.201253732 | 0.590022167 |
| g MGYG-HGUT-00585 | g Mycosphaerella               | 0.032532842  | 0.379771145 | 0.722533174 |
| g MGYG-HGUT-00585 | g Simplicillium                | -0.002422399 | 0.947869509 | 0.98134773  |
| g MGYG-HGUT-00585 | g unclassified Cordycipitaceae | 0.007166699  | 0.846616736 | 0.947931255 |
| g MGYG-HGUT-00585 | g unidentified                 | 0.039171746  | 0.290201149 | 0.660151812 |
| g Bifidobacterium | g Verticillium                 | -0.025189262 | 0.496514098 | 0.789024205 |
| g Bifidobacterium | g unclassified Tremellomycetes | 0.002844517  | 0.938801917 | 0.978000513 |
| g Bifidobacterium | g Candida                      | 0.004000359  | 0.914017045 | 0.971160503 |
| g Bifidobacterium | g Cladosporium                 | 0.029878041  | 0.419890869 | 0.746028897 |
| g Bifidobacterium | g Debaryomyces                 | -0.047064052 | 0.203729335 | 0.593377363 |
| g Bifidobacterium | g Aspergillus                  | -0.049570316 | 0.180647934 | 0.575010893 |
| g Bifidobacterium | g Kazachstania                 | -0.030664685 | 0.407751323 | 0.739219548 |
| g Bifidobacterium | g Malassezia                   | -0.022760186 | 0.538955054 | 0.814978906 |
| g Bifidobacterium | g unclassified Fungi           | 0.02608968   | 0.481246136 | 0.780189053 |
| g Bifidobacterium | g Mycosphaerella               | -0.05605395  | 0.129993299 | 0.517527876 |
| g Bifidobacterium | g Simplicillium                | 0.003561279  | 0.92342378  | 0.974172444 |
| g Bifidobacterium | g unclassified Cordycipitaceae | -0.015913579 | 0.667525561 | 0.879421986 |
| g Bifidobacterium | g unidentified                 | 0.002340748  | 0.949624283 | 0.982291446 |
| g Pauljensia      | g Verticillium                 | -0.113900918 | 0.002040227 | 0.08567336  |
| g Pauljensia      | g unclassified Tremellomycetes | 0.072258477  | 0.050835803 | 0.386485359 |
| g Pauljensia      | g Candida                      | 0.041893335  | 0.257958774 | 0.637448375 |
| g Pauljensia      | g Cladosporium                 | 0.064809813  | 0.079927614 | 0.45101344  |
| g Pauljensia      | g Debaryomyces                 | 0.047957306  | 0.195268985 | 0.584648627 |
| g Pauljensia      | g Aspergillus                  | 0.05008454   | 0.17616175  | 0.571420949 |
| g Pauljensia      | g Kazachstania                 | 0.072478412  | 0.050133533 | 0.385192726 |



|                   |                                |              |             |             |
|-------------------|--------------------------------|--------------|-------------|-------------|
| g Pauljensenia    | g Malassezia                   | -0.037800465 | 0.30743101  | 0.670833121 |
| g Pauljensenia    | g unclassified Fungi           | 0.043720983  | 0.237751184 | 0.622281234 |
| g Pauljensenia    | g Mycosphaerella               | -0.051533408 | 0.163967878 | 0.561723687 |
| g Pauljensenia    | g Simplicillium                | -0.011228295 | 0.76183684  | 0.914666261 |
| g Pauljensenia    | g unclassified Cordycipitaceae | -0.051850344 | 0.161387173 | 0.55873063  |
| g Pauljensenia    | g unidentified                 | -0.060778379 | 0.100595862 | 0.478858752 |
| g Actinomyces     | g Verticillium                 | -0.130543072 | 0.000402243 | 0.035930399 |
| g Actinomyces     | g unclassified Tremellomycetes | 0.092562173  | 0.012290268 | 0.218214125 |
| g Actinomyces     | g Candida                      | 0.08899013   | 0.016098002 | 0.248402621 |
| g Actinomyces     | g Cladosporium                 | 0.030389785  | 0.411969674 | 0.742316502 |
| g Actinomyces     | g Debaryomyces                 | 0.00861359   | 0.816156295 | 0.935604584 |
| g Actinomyces     | g Aspergillus                  | 0.127048971  | 0.00057507  | 0.045979793 |
| g Actinomyces     | g Kazachstania                 | 0.078914752  | 0.032900497 | 0.325681065 |
| g Actinomyces     | g Malassezia                   | -0.048549429 | 0.189804262 | 0.579823529 |
| g Actinomyces     | g unclassified Fungi           | 0.060700276  | 0.101034728 | 0.478906569 |
| g Actinomyces     | g Mycosphaerella               | -0.004696836 | 0.899121034 | 0.965742873 |
| g Actinomyces     | g Simplicillium                | -0.00085856  | 0.981512139 | 0.993008299 |
| g Actinomyces     | g unclassified Cordycipitaceae | -0.063833015 | 0.084588838 | 0.458565103 |
| g Actinomyces     | g unidentified                 | -0.015426474 | 0.677119692 | 0.884796861 |
| g Rothia          | g Verticillium                 | -0.066637489 | 0.071766418 | 0.442098997 |
| g Rothia          | g unclassified Tremellomycetes | -0.032925032 | 0.374050343 | 0.718546866 |
| g Rothia          | g Candida                      | 0.0179399    | 0.628208318 | 0.859431211 |
| g Rothia          | g Cladosporium                 | 0.012530886  | 0.735188976 | 0.907315107 |
| g Rothia          | g Debaryomyces                 | 0.061367085  | 0.097336449 | 0.477459115 |
| g Rothia          | g Aspergillus                  | 0.020436773  | 0.581180433 | 0.837881654 |
| g Rothia          | g Kazachstania                 | 0.009323412  | 0.801310621 | 0.930555602 |
| g Rothia          | g Malassezia                   | 0.028615331  | 0.439814067 | 0.758246834 |
| g Rothia          | g unclassified Fungi           | 0.041395172  | 0.263667131 | 0.641845793 |
| g Rothia          | g Mycosphaerella               | -0.024256361 | 0.512600693 | 0.800618989 |
| g Rothia          | g Simplicillium                | -0.003261952 | 0.92984271  | 0.975279568 |
| g Rothia          | g unclassified Cordycipitaceae | -0.076725709 | 0.038084726 | 0.343232686 |
| g Rothia          | g unidentified                 | 0.012880726  | 0.728084444 | 0.907012052 |
| g Corynebacterium | g Verticillium                 | -0.113286914 | 0.002158008 | 0.088899837 |
| g Corynebacterium | g unclassified Tremellomycetes | -0.007448264 | 0.840669676 | 0.945574672 |
| g Corynebacterium | g Candida                      | 0.102035999  | 0.005758284 | 0.146476357 |
| g Corynebacterium | g Cladosporium                 | -0.039025379 | 0.292008663 | 0.660859538 |
| g Corynebacterium | g Debaryomyces                 | 0.020980076  | 0.57116937  | 0.832313398 |
| g Corynebacterium | g Aspergillus                  | 0.060821154  | 0.100356146 | 0.478819278 |
| g Corynebacterium | g Kazachstania                 | 0.001149624  | 0.975246251 | 0.990490577 |
| g Corynebacterium | g Malassezia                   | -0.031101258 | 0.401105129 | 0.735790931 |
| g Corynebacterium | g unclassified Fungi           | 0.024355302  | 0.510881835 | 0.799135489 |
| g Corynebacterium | g Mycosphaerella               | 0.048833186  | 0.187225676 | 0.577661122 |
| g Corynebacterium | g Simplicillium                | -0.001892889 | 0.959253379 | 0.984847119 |
| g Corynebacterium | g unclassified Cordycipitaceae | -0.115357067 | 0.001784058 | 0.083377853 |
| g Corynebacterium | g unidentified                 | -0.004535602 | 0.902566481 | 0.966636316 |
| g UBA11452        | g Verticillium                 | 0.021795823  | 0.556293808 | 0.82296164  |
| g UBA11452        | g unclassified Tremellomycetes | -0.094892307 | 0.010258012 | 0.1959478   |
| g UBA11452        | g Candida                      | -0.021957695 | 0.553364565 | 0.820471322 |
| g UBA11452        | g Cladosporium                 | -0.073415383 | 0.047232007 | 0.376645892 |
| g UBA11452        | g Debaryomyces                 | -0.066638112 | 0.071763756 | 0.442098997 |
| g UBA11452        | g Aspergillus                  | 0.061546558  | 0.096359719 | 0.47685118  |
| g UBA11452        | g Kazachstania                 | -0.054079196 | 0.144095962 | 0.538704729 |
| g UBA11452        | g Malassezia                   | 0.039191163  | 0.28996193  | 0.660061436 |
| g UBA11452        | g unclassified Fungi           | 0.061417005  | 0.097063982 | 0.477459115 |
| g UBA11452        | g Mycosphaerella               | 0.010780902  | 0.771056667 | 0.917834971 |
| g UBA11452        | g Simplicillium                | -0.005228996 | 0.887762933 | 0.962235722 |
| g UBA11452        | g unclassified Cordycipitaceae | -0.016624734 | 0.653615669 | 0.872421924 |
| g UBA11452        | g unidentified                 | 0.117578213  | 0.001449664 | 0.073296059 |
| g UBA1829         | g Verticillium                 | 0.005962945  | 0.872136126 | 0.956423148 |
| g UBA1829         | g unclassified Tremellomycetes | -0.052336972 | 0.157484491 | 0.55423489  |
| g UBA1829         | g Candida                      | -0.065991143 | 0.07457102  | 0.444519981 |
| g UBA1829         | g Cladosporium                 | -0.044220029 | 0.232432766 | 0.617638717 |
| g UBA1829         | g Debaryomyces                 | -0.126611545 | 0.000601013 | 0.046422777 |
| g UBA1829         | g Aspergillus                  | 0.069460687  | 0.06050945  | 0.412830947 |
| g UBA1829         | g Kazachstania                 | -0.071317478 | 0.053933993 | 0.397628223 |
| g UBA1829         | g Malassezia                   | -0.004867215 | 0.895482207 | 0.96495896  |
| g UBA1829         | g unclassified Fungi           | 0.05347895   | 0.148606715 | 0.544702547 |
| g UBA1829         | g Mycosphaerella               | -0.043862315 | 0.236236352 | 0.620061879 |
| g UBA1829         | g Simplicillium                | -0.005974587 | 0.871888641 | 0.956423148 |
| g UBA1829         | g unclassified Cordycipitaceae | 0.012878885  | 0.728121763 | 0.907012052 |
| g UBA1829         | g unidentified                 | 0.073987952  | 0.0455293   | 0.370793362 |
| g MGYG-HGUT-00666 | g Verticillium                 | -0.00617316  | 0.867669252 | 0.955229514 |
| g MGYG-HGUT-00666 | g unclassified Tremellomycetes | -0.021241262 | 0.566385992 | 0.829654737 |
| g MGYG-HGUT-00666 | g Candida                      | -0.037463022 | 0.311772455 | 0.672399691 |
| g MGYG-HGUT-00666 | g Cladosporium                 | -0.044845143 | 0.22589043  | 0.612692296 |
| g MGYG-HGUT-00666 | g Debaryomyces                 | -0.14382553  | 9.53E-05    | 0.018409489 |
| g MGYG-HGUT-00666 | g Aspergillus                  | 0.056546419  | 0.126648629 | 0.5134831   |
| g MGYG-HGUT-00666 | g Kazachstania                 | -0.022007838 | 0.552458714 | 0.820336555 |

|                   |                                |              |             |             |
|-------------------|--------------------------------|--------------|-------------|-------------|
| g MGYG-HGUT-00666 | g Malassezia                   | 0.031214538  | 0.399391257 | 0.73438024  |
| g MGYG-HGUT-00666 | g unclassified Fungi           | 0.027311773  | 0.460938364 | 0.769075712 |
| g MGYG-HGUT-00666 | g Mycosphaerella               | -0.060809593 | 0.100420889 | 0.478858752 |
| g MGYG-HGUT-00666 | g Simplicillium                | 0.018227186  | 0.622714989 | 0.856146372 |
| g MGYG-HGUT-00666 | g unclassified Cordycipitaceae | -0.007793325 | 0.833393866 | 0.941769117 |
| g MGYG-HGUT-00666 | g unidentified                 | 0.065777106  | 0.075519222 | 0.445089102 |
| g Victivallis     | g Verticillium                 | 0.02859743   | 0.440100355 | 0.758246834 |
| g Victivallis     | g unclassified Tremellomycetes | -0.060648606 | 0.101325907 | 0.479530746 |
| g Victivallis     | g Candida                      | 0.003170356  | 0.93180787  | 0.976058688 |
| g Victivallis     | g Cladosporium                 | -0.043056394 | 0.244966163 | 0.628403245 |
| g Victivallis     | g Debaryomyces                 | -0.078159685 | 0.034616105 | 0.331642857 |
| g Victivallis     | g Aspergillus                  | 0.048868231  | 0.186909009 | 0.57764928  |
| g Victivallis     | g Kazachstania                 | -0.066635413 | 0.071775286 | 0.442098997 |
| g Victivallis     | g Malassezia                   | 0.015338607  | 0.678855991 | 0.885603387 |
| g Victivallis     | g unclassified Fungi           | 0.035828467  | 0.333370343 | 0.688874238 |
| g Victivallis     | g Mycosphaerella               | 0.029666872  | 0.423185377 | 0.746980426 |
| g Victivallis     | g Simplicillium                | 0.026659886  | 0.471710937 | 0.774056714 |
| g Victivallis     | g unclassified Cordycipitaceae | -0.013773002 | 0.710070668 | 0.902091837 |
| g Victivallis     | g unidentified                 | 0.061120648  | 0.098690464 | 0.477955684 |
| g MGYG-HGUT-00608 | g Verticillium                 | 0.021190751  | 0.56730955  | 0.830212925 |
| g MGYG-HGUT-00608 | g unclassified Tremellomycetes | -0.033102639 | 0.37147722  | 0.717854628 |
| g MGYG-HGUT-00608 | g Candida                      | -0.057383161 | 0.121119545 | 0.505823928 |
| g MGYG-HGUT-00608 | g Cladosporium                 | 0.017823282  | 0.630444121 | 0.860229872 |
| g MGYG-HGUT-00608 | g Debaryomyces                 | -0.099801189 | 0.006924514 | 0.158871363 |
| g MGYG-HGUT-00608 | g Aspergillus                  | -0.008172152 | 0.825422488 | 0.939308882 |
| g MGYG-HGUT-00608 | g Kazachstania                 | -0.113281531 | 0.002159068 | 0.088899837 |
| g MGYG-HGUT-00608 | g Malassezia                   | 0.008050526  | 0.827979857 | 0.939989934 |
| g MGYG-HGUT-00608 | g unclassified Fungi           | 0.040024578  | 0.279818951 | 0.656696416 |
| g MGYG-HGUT-00608 | g Mycosphaerella               | -0.027702612 | 0.454546064 | 0.765814499 |
| g MGYG-HGUT-00608 | g Simplicillium                | 0.014609746  | 0.693323433 | 0.893853383 |
| g MGYG-HGUT-00608 | g unclassified Cordycipitaceae | 0.038324357  | 0.300770263 | 0.667386268 |
| g MGYG-HGUT-00608 | g unidentified                 | 0.05053007   | 0.172342332 | 0.566309615 |
| g MGYG-HGUT-00971 | g Verticillium                 | 0.012750464  | 0.730727105 | 0.907315107 |
| g MGYG-HGUT-00971 | g unclassified Tremellomycetes | -0.045077795 | 0.223487749 | 0.610781858 |
| g MGYG-HGUT-00971 | g Candida                      | -0.037809021 | 0.307321448 | 0.670833121 |
| g MGYG-HGUT-00971 | g Cladosporium                 | -0.01883626  | 0.611137963 | 0.851489391 |
| g MGYG-HGUT-00971 | g Debaryomyces                 | -0.057652179 | 0.119382525 | 0.502959311 |
| g MGYG-HGUT-00971 | g Aspergillus                  | 0.033197006  | 0.370114518 | 0.71692327  |
| g MGYG-HGUT-00971 | g Kazachstania                 | 0.005113454  | 0.890227133 | 0.962904765 |
| g MGYG-HGUT-00971 | g Malassezia                   | -0.006265891 | 0.865700119 | 0.954950345 |
| g MGYG-HGUT-00971 | g unclassified Fungi           | 0.055980462  | 0.130498215 | 0.517804933 |
| g MGYG-HGUT-00971 | g Mycosphaerella               | -0.008936993 | 0.809383923 | 0.933584001 |
| g MGYG-HGUT-00971 | g Simplicillium                | -0.020092063 | 0.587574361 | 0.841465036 |
| g MGYG-HGUT-00971 | g unclassified Cordycipitaceae | -0.009286608 | 0.802078644 | 0.930555602 |
| g MGYG-HGUT-00971 | g unidentified                 | 0.066460697  | 0.072524839 | 0.442493968 |
| g Akkermansia     | g Verticillium                 | 0.037551615  | 0.310628767 | 0.672396991 |
| g Akkermansia     | g unclassified Tremellomycetes | -0.064772739 | 0.080100643 | 0.45101344  |
| g Akkermansia     | g Candida                      | 0.009540232  | 0.796789886 | 0.929219889 |
| g Akkermansia     | g Cladosporium                 | -0.042459251 | 0.251578495 | 0.632652956 |
| g Akkermansia     | g Debaryomyces                 | 0.056912335  | 0.124207042 | 0.508701089 |
| g Akkermansia     | g Aspergillus                  | 0.024273614  | 0.512300755 | 0.800408473 |
| g Akkermansia     | g Kazachstania                 | -0.020544952 | 0.579180579 | 0.836772676 |
| g Akkermansia     | g Malassezia                   | 0.011958508  | 0.746861435 | 0.90996433  |
| g Akkermansia     | g unclassified Fungi           | 0.04983735   | 0.178307821 | 0.573729188 |
| g Akkermansia     | g Mycosphaerella               | 0.014474144  | 0.696027601 | 0.895302916 |
| g Akkermansia     | g Simplicillium                | -0.035479678 | 0.338100849 | 0.692780403 |
| g Akkermansia     | g unclassified Cordycipitaceae | 0.031301321  | 0.398081275 | 0.733431989 |
| g Akkermansia     | g unidentified                 | -0.03073105  | 0.406736805 | 0.738420989 |
| g CAG-312         | g Verticillium                 | 0.020163091  | 0.586254219 | 0.840615467 |
| g CAG-312         | g unclassified Tremellomycetes | -0.050614213 | 0.171627996 | 0.565255978 |
| g CAG-312         | g Candida                      | -0.041711188 | 0.260028053 | 0.638398936 |
| g CAG-312         | g Cladosporium                 | -0.029334999 | 0.428393424 | 0.751274884 |
| g CAG-312         | g Debaryomyces                 | -0.022761624 | 0.538929408 | 0.814978906 |
| g CAG-312         | g Aspergillus                  | -0.023874723 | 0.519258797 | 0.804094928 |
| g CAG-312         | g Kazachstania                 | -0.035843248 | 0.333170815 | 0.688730917 |
| g CAG-312         | g Malassezia                   | 0.038885108  | 0.293747977 | 0.662498101 |
| g CAG-312         | g unclassified Fungi           | 0.003522589  | 0.92425319  | 0.974172444 |
| g CAG-312         | g Mycosphaerella               | 0.043412776  | 0.241078335 | 0.624961035 |
| g CAG-312         | g Simplicillium                | 0.00772402   | 0.834854092 | 0.942615976 |
| g CAG-312         | g unclassified Cordycipitaceae | 0.018421558  | 0.619010145 | 0.856010969 |
| g CAG-312         | g unidentified                 | 0.018747692  | 0.612815503 | 0.852887587 |
| g UBA1731         | g Verticillium                 | -0.014371348 | 0.698080128 | 0.895302916 |
| g UBA1731         | g unclassified Tremellomycetes | -0.082209436 | 0.026238939 | 0.300469812 |
| g UBA1731         | g Candida                      | -0.005777979 | 0.876069876 | 0.957801213 |
| g UBA1731         | g Cladosporium                 | -0.027799368 | 0.452971306 | 0.765162867 |
| g UBA1731         | g Debaryomyces                 | -0.070711845 | 0.056010012 | 0.403195885 |
| g UBA1731         | g Aspergillus                  | 0.114050782  | 0.002012388 | 0.084840998 |
| g UBA1731         | g Kazachstania                 | -0.050695786 | 0.170937581 | 0.565092623 |

|                     |                                |              |             |             |
|---------------------|--------------------------------|--------------|-------------|-------------|
| g UBA1731           | g Malassezia                   | 0.004686782  | 0.899335822 | 0.965777518 |
| g UBA1731           | g unclassified Fungi           | 0.030841224  | 0.405055914 | 0.737444543 |
| g UBA1731           | g Mycosphaerella               | 0.020635108  | 0.577516374 | 0.836262521 |
| g UBA1731           | g Simplicillium                | 0.022506912  | 0.543482502 | 0.816215242 |
| g UBA1731           | g unclassified Cordycipitaceae | -0.000926737 | 0.980044325 | 0.9927886   |
| g UBA1731           | g unidentified                 | 0.082200354  | 0.02625557  | 0.300469812 |
| g UBA3624           | g Verticillium                 | 0.105893324  | 0.004154294 | 0.1257322   |
| g UBA3624           | g unclassified Tremellomycetes | -0.101400539 | 0.006070455 | 0.148686802 |
| g UBA3624           | g Candida                      | -0.03932857  | 0.288272835 | 0.659568247 |
| g UBA3624           | g Cladosporium                 | 0.0485138    | 0.190129874 | 0.580148307 |
| g UBA3624           | g Debaryomyces                 | -0.152287242 | 3.56E-05    | 0.011128631 |
| g UBA3624           | g Aspergillus                  | 0.055249944  | 0.135600334 | 0.525612724 |
| g UBA3624           | g Kazachstania                 | -0.048951346 | 0.186159565 | 0.577169451 |
| g UBA3624           | g Malassezia                   | 0.068326199  | 0.064843881 | 0.423806055 |
| g UBA3624           | g unclassified Fungi           | 0.10330921   | 0.005175919 | 0.140037979 |
| g UBA3624           | g Mycosphaerella               | 0.066708125  | 0.071465214 | 0.442098997 |
| g UBA3624           | g Simplicillium                | -0.024981627 | 0.500071092 | 0.791467588 |
| g UBA3624           | g unclassified Cordycipitaceae | 0.082456668  | 0.02578969  | 0.299124466 |
| g UBA3624           | g unidentified                 | 0.05894153   | 0.111326266 | 0.49451218  |
| g CAG-484           | g Verticillium                 | 0.057308058  | 0.121607991 | 0.506237513 |
| g CAG-484           | g unclassified Tremellomycetes | 0.011978858  | 0.746445439 | 0.909815242 |
| g CAG-484           | g Candida                      | -0.053195212 | 0.150776067 | 0.547949889 |
| g CAG-484           | g Cladosporium                 | 0.046869198  | 0.205609729 | 0.595120938 |
| g CAG-484           | g Debaryomyces                 | -0.091939681 | 0.012890183 | 0.221076037 |
| g CAG-484           | g Aspergillus                  | -0.027053632 | 0.46518771  | 0.77119373  |
| g CAG-484           | g Kazachstania                 | -0.025702802 | 0.487774819 | 0.783353899 |
| g CAG-484           | g Malassezia                   | 0.05096102   | 0.168707063 | 0.563848296 |
| g CAG-484           | g unclassified Fungi           | -0.007002051 | 0.850098409 | 0.948917865 |
| g CAG-484           | g Mycosphaerella               | 0.031902893  | 0.389071731 | 0.72882936  |
| g CAG-484           | g Simplicillium                | 0.003459304  | 0.925610042 | 0.974172444 |
| g CAG-484           | g unclassified Cordycipitaceae | 0.062148946  | 0.093138491 | 0.471954484 |
| g CAG-484           | g unidentified                 | 0.008933224  | 0.809462767 | 0.933584001 |
| g Zag1              | g Verticillium                 | 0.022117987  | 0.550471369 | 0.819050623 |
| g Zag1              | g unclassified Tremellomycetes | -0.061796757 | 0.095011154 | 0.474527669 |
| g Zag1              | g Candida                      | -0.031920083 | 0.388816118 | 0.72847949  |
| g Zag1              | g Cladosporium                 | -0.027495576 | 0.457925979 | 0.767141961 |
| g Zag1              | g Debaryomyces                 | -0.006605815 | 0.858489107 | 0.952142599 |
| g Zag1              | g Aspergillus                  | -0.009211923 | 0.803637785 | 0.931248848 |
| g Zag1              | g Kazachstania                 | -0.068324362 | 0.064851102 | 0.423806055 |
| g Zag1              | g Malassezia                   | -0.03870613  | 0.295977292 | 0.664692637 |
| g Zag1              | g unclassified Fungi           | 0.0583342    | 0.115066041 | 0.498084846 |
| g Zag1              | g Mycosphaerella               | 0.002904759  | 0.937508462 | 0.977568509 |
| g Zag1              | g Simplicillium                | 0.067314117  | 0.06892342  | 0.437275185 |
| g Zag1              | g unclassified Cordycipitaceae | -0.021009284 | 0.570633502 | 0.831953372 |
| g Zag1              | g unidentified                 | 0.064962064  | 0.079220211 | 0.45101344  |
| g CAG-196           | g Verticillium                 | 0.02251035   | 0.543420915 | 0.816215242 |
| g CAG-196           | g unclassified Tremellomycetes | -0.076549011 | 0.038531886 | 0.345047824 |
| g CAG-196           | g Candida                      | -0.014378087 | 0.697945501 | 0.895302916 |
| g CAG-196           | g Cladosporium                 | -0.023623824 | 0.523660159 | 0.806147397 |
| g CAG-196           | g Debaryomyces                 | -0.056068006 | 0.129896893 | 0.517527876 |
| g CAG-196           | g Aspergillus                  | 0.020771407  | 0.575004669 | 0.835007467 |
| g CAG-196           | g Kazachstania                 | -0.045652794 | 0.217633359 | 0.605255245 |
| g CAG-196           | g Malassezia                   | 0.030343039  | 0.412689563 | 0.74272145  |
| g CAG-196           | g unclassified Fungi           | 0.048613531  | 0.189219477 | 0.579369719 |
| g CAG-196           | g Mycosphaerella               | -0.016094775 | 0.663970354 | 0.878486407 |
| g CAG-196           | g Simplicillium                | 0.043666237  | 0.238339796 | 0.622892944 |
| g CAG-196           | g unclassified Cordycipitaceae | -0.061000741 | 0.099354679 | 0.478320958 |
| g CAG-196           | g unidentified                 | 0.094402563  | 0.010658495 | 0.19927243  |
| g Zag111            | g Verticillium                 | 0.040576275  | 0.273238524 | 0.650632327 |
| g Zag111            | g unclassified Tremellomycetes | 0.001754319  | 0.96223395  | 0.986228955 |
| g Zag111            | g Candida                      | -0.04639058  | 0.210281875 | 0.598977875 |
| g Zag111            | g Cladosporium                 | 0.069198316  | 0.061489952 | 0.416324599 |
| g Zag111            | g Debaryomyces                 | -0.111568678 | 0.002521435 | 0.095633781 |
| g Zag111            | g Aspergillus                  | 0.03384792   | 0.360799693 | 0.711747526 |
| g Zag111            | g Kazachstania                 | -0.025133134 | 0.497474302 | 0.789601479 |
| g Zag111            | g Malassezia                   | 0.078628132  | 0.033542982 | 0.327713401 |
| g Zag111            | g unclassified Fungi           | 0.082336327  | 0.026007529 | 0.299643528 |
| g Zag111            | g Mycosphaerella               | 0.033224611  | 0.369716474 | 0.71692327  |
| g Zag111            | g Simplicillium                | 0.080010785  | 0.030539709 | 0.315608804 |
| g Zag111            | g unclassified Cordycipitaceae | 0.064492006  | 0.08142075  | 0.452919383 |
| g Zag111            | g unidentified                 | 0.042599506  | 0.250014364 | 0.631737101 |
| g Gastranaerophilus | g Verticillium                 | 0.073654783  | 0.046513685 | 0.374986617 |
| g Gastranaerophilus | g unclassified Tremellomycetes | -0.027333908 | 0.460575012 | 0.769027512 |
| g Gastranaerophilus | g Candida                      | -0.015241229 | 0.680782207 | 0.886650746 |
| g Gastranaerophilus | g Cladosporium                 | 0.0950035    | 0.010168969 | 0.195650963 |
| g Gastranaerophilus | g Debaryomyces                 | -0.105675182 | 0.004232884 | 0.126141964 |
| g Gastranaerophilus | g Aspergillus                  | 0.005751945  | 0.876623805 | 0.957913373 |
| g Gastranaerophilus | g Kazachstania                 | -0.030274321 | 0.413749158 | 0.742811081 |

|                     |                                |              |             |             |
|---------------------|--------------------------------|--------------|-------------|-------------|
| g Gastranaerophilus | g Malassezia                   | 0.075877906  | 0.040270999 | 0.350685903 |
| g Gastranaerophilus | g unclassified Fungi           | 0.05322862   | 0.150519395 | 0.547902227 |
| g Gastranaerophilus | g Mycosphaerella               | 0.032490178  | 0.380396695 | 0.722837319 |
| g Gastranaerophilus | g Simplicillium                | 0.048455482  | 0.190663721 | 0.580402598 |
| g Gastranaerophilus | g unclassified Cordycipitaceae | 0.083571164  | 0.023845987 | 0.287933808 |
| g Gastranaerophilus | g unidentified                 | 0.039776205  | 0.282816248 | 0.657890287 |
| g UBA2883           | g Verticillium                 | 0.008497844  | 0.818583484 | 0.936487497 |
| g UBA2883           | g unclassified Tremellomycetes | -0.038324548 | 0.30076785  | 0.667386268 |
| g UBA2883           | g Candida                      | -0.009901482 | 0.789272914 | 0.925951882 |
| g UBA2883           | g Cladosporium                 | 0.080857476  | 0.028816812 | 0.31117391  |
| g UBA2883           | g Debaryomyces                 | -0.071025847 | 0.054925517 | 0.400015015 |
| g UBA2883           | g Aspergillus                  | 0.006755359  | 0.855320433 | 0.950427981 |
| g UBA2883           | g Kazachstania                 | -0.021168659 | 0.567713727 | 0.830492386 |
| g UBA2883           | g Malassezia                   | -0.010291469 | 0.781179911 | 0.921874185 |
| g UBA2883           | g unclassified Fungi           | 0.066081428  | 0.074173971 | 0.444193078 |
| g UBA2883           | g Mycosphaerella               | -0.006955274 | 0.851088089 | 0.949400054 |
| g UBA2883           | g Simplicillium                | 0.015140856  | 0.682769831 | 0.887523438 |
| g UBA2883           | g unclassified Cordycipitaceae | 0.032667705  | 0.37779798  | 0.721374462 |
| g UBA2883           | g unidentified                 | 0.077190049  | 0.036930592 | 0.340172772 |
| g MGYG-HGUT-02883   | g Verticillium                 | 0.058323964  | 0.115129903 | 0.498084846 |
| g MGYG-HGUT-02883   | g unclassified Tremellomycetes | -0.106110019 | 0.004077535 | 0.124706579 |
| g MGYG-HGUT-02883   | g Candida                      | -0.118591953 | 0.001317102 | 0.070391804 |
| g MGYG-HGUT-02883   | g Cladosporium                 | -0.044738276 | 0.226999487 | 0.612967811 |
| g MGYG-HGUT-02883   | g Debaryomyces                 | -0.089111127 | 0.01595377  | 0.247904256 |
| g MGYG-HGUT-02883   | g Aspergillus                  | 0.015148021  | 0.682627887 | 0.887523438 |
| g MGYG-HGUT-02883   | g Kazachstania                 | -0.049204731 | 0.183888478 | 0.575925162 |
| g MGYG-HGUT-02883   | g Malassezia                   | 0.016329559  | 0.659374951 | 0.875251597 |
| g MGYG-HGUT-02883   | g unclassified Fungi           | 0.072325958  | 0.050619461 | 0.386038256 |
| g MGYG-HGUT-02883   | g Mycosphaerella               | 0.00309275   | 0.933473213 | 0.976474253 |
| g MGYG-HGUT-02883   | g Simplicillium                | 0.021840316  | 0.555487907 | 0.822007136 |
| g MGYG-HGUT-02883   | g unclassified Cordycipitaceae | 0.040529324  | 0.273794397 | 0.651089839 |
| g MGYG-HGUT-02883   | g unidentified                 | 0.065967757  | 0.074674148 | 0.444519981 |
| g Cloacibacillus    | g Verticillium                 | -0.011885713 | 0.748350168 | 0.910244784 |
| g Cloacibacillus    | g unclassified Tremellomycetes | 0.002331015  | 0.949833457 | 0.982323851 |
| g Cloacibacillus    | g Candida                      | -0.0092737   | 0.802348068 | 0.930663955 |
| g Cloacibacillus    | g Cladosporium                 | 0.033586318  | 0.364525531 | 0.713891251 |
| g Cloacibacillus    | g Debaryomyces                 | -0.06888883  | 0.062663362 | 0.418626069 |
| g Cloacibacillus    | g Aspergillus                  | 0.013529854  | 0.71496398  | 0.902925307 |
| g Cloacibacillus    | g Kazachstania                 | -0.000278253 | 0.994007745 | 0.997274144 |
| g Cloacibacillus    | g Malassezia                   | 0.044764543  | 0.226726527 | 0.612967811 |
| g Cloacibacillus    | g unclassified Fungi           | -0.011583653 | 0.754537565 | 0.911600966 |
| g Cloacibacillus    | g Mycosphaerella               | -0.004713983 | 0.898754711 | 0.965643451 |
| g Cloacibacillus    | g Simplicillium                | -0.015419619 | 0.6772551   | 0.884796861 |
| g Cloacibacillus    | g unclassified Cordycipitaceae | 0.008680643  | 0.814750984 | 0.934895807 |
| g Cloacibacillus    | g unidentified                 | 0.012593772  | 0.733910197 | 0.907315107 |
| g An23              | g Verticillium                 | 0.037300271  | 0.313880726 | 0.67400281  |
| g An23              | g unclassified Tremellomycetes | 0.039566182  | 0.285367635 | 0.658617299 |
| g An23              | g Candida                      | -0.004081268 | 0.912284943 | 0.970621282 |
| g An23              | g Cladosporium                 | 0.037979906  | 0.305138706 | 0.670057703 |
| g An23              | g Debaryomyces                 | -0.060481734 | 0.102270838 | 0.481204983 |
| g An23              | g Aspergillus                  | 0.020478243  | 0.580413417 | 0.837460428 |
| g An23              | g Kazachstania                 | -0.01623666  | 0.661191741 | 0.87645384  |
| g An23              | g Malassezia                   | 0.048114366  | 0.193808379 | 0.582802008 |
| g An23              | g unclassified Fungi           | 0.004880111  | 0.895206874 | 0.96495896  |
| g An23              | g Mycosphaerella               | 0.02356391   | 0.524714025 | 0.8071702   |
| g An23              | g Simplicillium                | 0.013048279  | 0.724689978 | 0.906744053 |
| g An23              | g unclassified Cordycipitaceae | 0.015896193  | 0.667867081 | 0.879682531 |
| g An23              | g unidentified                 | 0.019495705  | 0.598712034 | 0.846523771 |
| g Pyramidobacter    | g Verticillium                 | 0.029285836  | 0.429168085 | 0.751274884 |
| g Pyramidobacter    | g unclassified Tremellomycetes | 0.004544925  | 0.902367197 | 0.966636316 |
| g Pyramidobacter    | g Candida                      | -0.048147589 | 0.193500451 | 0.582538201 |
| g Pyramidobacter    | g Cladosporium                 | 0.024998658  | 0.499778826 | 0.791370491 |
| g Pyramidobacter    | g Debaryomyces                 | -0.098003644 | 0.008011692 | 0.172316522 |
| g Pyramidobacter    | g Aspergillus                  | 0.049333952  | 0.182738191 | 0.575260034 |
| g Pyramidobacter    | g Kazachstania                 | -0.00562741  | 0.879274338 | 0.959304186 |
| g Pyramidobacter    | g Malassezia                   | -0.012797906 | 0.729764271 | 0.907197641 |
| g Pyramidobacter    | g unclassified Fungi           | 0.012505251  | 0.735710456 | 0.90737623  |
| g Pyramidobacter    | g Mycosphaerella               | 0.002482063  | 0.946587407 | 0.980691059 |
| g Pyramidobacter    | g Simplicillium                | -0.057752844 | 0.11873757  | 0.502487018 |
| g Pyramidobacter    | g unclassified Cordycipitaceae | 0.017586283  | 0.634998285 | 0.862387935 |
| g Pyramidobacter    | g unidentified                 | -0.023012847 | 0.534457448 | 0.812123595 |
| g Fusobacterium_A   | g Verticillium                 | -0.04849305  | 0.190319694 | 0.580290809 |
| g Fusobacterium_A   | g unclassified Tremellomycetes | -0.005680448 | 0.878145349 | 0.958586145 |
| g Fusobacterium_A   | g Candida                      | -0.010396355 | 0.779007294 | 0.921314364 |
| g Fusobacterium_A   | g Cladosporium                 | 0.008185052  | 0.825151346 | 0.939308882 |
| g Fusobacterium_A   | g Debaryomyces                 | 0.072367812  | 0.050485668 | 0.386038256 |
| g Fusobacterium_A   | g Aspergillus                  | -0.005960498 | 0.872188159 | 0.956423148 |
| g Fusobacterium_A   | g Kazachstania                 | 0.005556386  | 0.880786599 | 0.9597862   |



|                   |                                |              |             |             |
|-------------------|--------------------------------|--------------|-------------|-------------|
| g Fusobacterium A | g Malassezia                   | -0.031342829 | 0.397455624 | 0.732740506 |
| g Fusobacterium A | g unclassified Fungi           | -0.121741024 | 0.000973222 | 0.05906749  |
| g Fusobacterium A | g Mycosphaerella               | 0.025994237  | 0.482852346 | 0.780449413 |
| g Fusobacterium A | g Simplicillium                | -0.005007169 | 0.892494812 | 0.963948577 |
| g Fusobacterium A | g unclassified Cordycipitaceae | -0.026079541 | 0.481416636 | 0.780189053 |
| g Fusobacterium A | g unidentified                 | -0.012062817 | 0.744729859 | 0.909574751 |
| g Fusobacterium   | g Verticillium                 | -0.017314603 | 0.640235874 | 0.864117891 |
| g Fusobacterium   | g unclassified Tremellomycetes | -0.031402853 | 0.396551914 | 0.732625333 |
| g Fusobacterium   | g Candida                      | 0.007409465  | 0.841488627 | 0.945792103 |
| g Fusobacterium   | g Cladosporium                 | 0.019543505  | 0.597815812 | 0.846195692 |
| g Fusobacterium   | g Debaryomyces                 | 0.038900455  | 0.293557349 | 0.662350504 |
| g Fusobacterium   | g Aspergillus                  | -0.04390684  | 0.235760542 | 0.619676617 |
| g Fusobacterium   | g Kazachstania                 | 0.051713814  | 0.162495117 | 0.560460432 |
| g Fusobacterium   | g Malassezia                   | 0.007959167  | 0.829902028 | 0.940630371 |
| g Fusobacterium   | g unclassified Fungi           | -0.045379137 | 0.2204065   | 0.607083027 |
| g Fusobacterium   | g Mycosphaerella               | 0.027188187  | 0.462970053 | 0.769075712 |
| g Fusobacterium   | g Simplicillium                | -0.041398957 | 0.263623435 | 0.641845793 |
| g Fusobacterium   | g unclassified Cordycipitaceae | 0.026651852  | 0.471844555 | 0.774056714 |
| g Fusobacterium   | g unidentified                 | -0.028139783 | 0.447455416 | 0.762502994 |
| g Fusobacterium B | g Verticillium                 | -0.026942094 | 0.467030474 | 0.772326375 |
| g Fusobacterium B | g unclassified Tremellomycetes | -0.00623402  | 0.866376807 | 0.954999934 |
| g Fusobacterium B | g Candida                      | -0.012036265 | 0.745272283 | 0.909574751 |
| g Fusobacterium B | g Cladosporium                 | 0.027770676  | 0.453437972 | 0.765276016 |
| g Fusobacterium B | g Debaryomyces                 | 0.044096699  | 0.23373921  | 0.617739342 |
| g Fusobacterium B | g Aspergillus                  | -0.008566609 | 0.817141263 | 0.936168239 |
| g Fusobacterium B | g Kazachstania                 | 0.048823651  | 0.187311902 | 0.577661122 |
| g Fusobacterium B | g Malassezia                   | -0.012224897 | 0.741421585 | 0.909337726 |
| g Fusobacterium B | g unclassified Fungi           | -0.050662074 | 0.171222657 | 0.565255978 |
| g Fusobacterium B | g Mycosphaerella               | 0.027517373  | 0.457569479 | 0.767141961 |
| g Fusobacterium B | g Simplicillium                | 0.010641479  | 0.773936554 | 0.91855054  |
| g Fusobacterium B | g unclassified Cordycipitaceae | 0.032474835  | 0.380621811 | 0.722837319 |
| g Fusobacterium B | g unidentified                 | -0.012159933 | 0.742747026 | 0.909574751 |
| g Cetobacterium A | g Verticillium                 | -0.052560076 | 0.155719265 | 0.552962589 |
| g Cetobacterium A | g unclassified Tremellomycetes | -0.069526647 | 0.060264996 | 0.412830947 |
| g Cetobacterium A | g Candida                      | -0.052825995 | 0.153634915 | 0.550919914 |
| g Cetobacterium A | g Cladosporium                 | 0.004520878  | 0.902881225 | 0.966636316 |
| g Cetobacterium A | g Debaryomyces                 | 0.040211344  | 0.277579347 | 0.654488559 |
| g Cetobacterium A | g Aspergillus                  | 0.050614795  | 0.171623061 | 0.565255978 |
| g Cetobacterium A | g Kazachstania                 | 0.025208389  | 0.49618712  | 0.788741491 |
| g Cetobacterium A | g Malassezia                   | -0.075431785 | 0.041463473 | 0.35586306  |
| g Cetobacterium A | g unclassified Fungi           | -0.053986998 | 0.144781927 | 0.540036076 |
| g Cetobacterium A | g Mycosphaerella               | 0.011496596  | 0.75632378  | 0.912160437 |
| g Cetobacterium A | g Simplicillium                | 0.032370737  | 0.382151332 | 0.723410923 |
| g Cetobacterium A | g unclassified Cordycipitaceae | 0.018723884  | 0.613266805 | 0.852887587 |
| g Cetobacterium A | g unidentified                 | -0.00477632  | 0.897423196 | 0.965250198 |
| g Leptotrichia    | g Verticillium                 | 0.007322152  | 0.843332238 | 0.946758089 |
| g Leptotrichia    | g unclassified Tremellomycetes | 0.025043801  | 0.499004578 | 0.791370491 |
| g Leptotrichia    | g Candida                      | 0.012253137  | 0.740845668 | 0.90933095  |
| g Leptotrichia    | g Cladosporium                 | 0.020439247  | 0.581134662 | 0.837881654 |
| g Leptotrichia    | g Debaryomyces                 | 0.05098897   | 0.168473289 | 0.563459023 |
| g Leptotrichia    | g Aspergillus                  | 0.013432408  | 0.716928349 | 0.903293001 |
| g Leptotrichia    | g Kazachstania                 | 0.056179947  | 0.129131126 | 0.516899602 |
| g Leptotrichia    | g Malassezia                   | 0.021842503  | 0.555448309 | 0.822007136 |
| g Leptotrichia    | g unclassified Fungi           | 0.025152737  | 0.49713884  | 0.789506698 |
| g Leptotrichia    | g Mycosphaerella               | 0.022422861  | 0.544989129 | 0.816215242 |
| g Leptotrichia    | g Simplicillium                | -0.030279558 | 0.41366835  | 0.742811081 |
| g Leptotrichia    | g unclassified Cordycipitaceae | -0.028733163 | 0.437932312 | 0.75696507  |
| g Leptotrichia    | g unidentified                 | -0.030277262 | 0.41370378  | 0.742811081 |
| g Sneathia        | g Verticillium                 | 0.034402799  | 0.352976143 | 0.704818603 |
| g Sneathia        | g unclassified Tremellomycetes | 0.020053421  | 0.588293126 | 0.841827972 |
| g Sneathia        | g Candida                      | -0.03640346  | 0.325665422 | 0.682100836 |
| g Sneathia        | g Cladosporium                 | 0.045562149  | 0.218549142 | 0.60636786  |
| g Sneathia        | g Debaryomyces                 | -0.029123996 | 0.431723934 | 0.753274911 |
| g Sneathia        | g Aspergillus                  | 0.068643269  | 0.063607496 | 0.421193    |
| g Sneathia        | g Kazachstania                 | 0.012714528  | 0.731456716 | 0.907315107 |
| g Sneathia        | g Malassezia                   | -0.030061809 | 0.41703613  | 0.744290485 |
| g Sneathia        | g unclassified Fungi           | 0.084275686  | 0.022683817 | 0.283321191 |
| g Sneathia        | g Mycosphaerella               | 0.032549233  | 0.379530981 | 0.722533174 |
| g Sneathia        | g Simplicillium                | -0.017456528 | 0.637497514 | 0.863812758 |
| g Sneathia        | g unclassified Cordycipitaceae | 0.062957273  | 0.088952157 | 0.465955266 |
| g Sneathia        | g unidentified                 | -0.011209387 | 0.762225835 | 0.914705578 |
| g MGYG-HGUT-01171 | g Verticillium                 | 0.039027551  | 0.291981793 | 0.660859538 |
| g MGYG-HGUT-01171 | g unclassified Tremellomycetes | -0.004174412 | 0.910291419 | 0.969320838 |
| g MGYG-HGUT-01171 | g Candida                      | 0.010852503  | 0.769578907 | 0.917270973 |
| g MGYG-HGUT-01171 | g Cladosporium                 | 0.018690895  | 0.613892347 | 0.852976464 |
| g MGYG-HGUT-01171 | g Debaryomyces                 | -0.040607127 | 0.272873686 | 0.650056134 |
| g MGYG-HGUT-01171 | g Aspergillus                  | 0.015204     | 0.681519162 | 0.886955574 |
| g MGYG-HGUT-01171 | g Kazachstania                 | -0.067162454 | 0.069552501 | 0.438881676 |

|                   |                                |              |             |             |
|-------------------|--------------------------------|--------------|-------------|-------------|
| g_MGYG-HGUT-01171 | g_Malassezia                   | 0.014178676  | 0.701933139 | 0.897212331 |
| g_MGYG-HGUT-01171 | g_unclassified_Fungi           | 0.098441184  | 0.007733875 | 0.169228729 |
| g_MGYG-HGUT-01171 | g_Mycosphaerella               | 0.032476187  | 0.380601968 | 0.722837319 |
| g_MGYG-HGUT-01171 | g_Simplicillium                | 0.062230221  | 0.092710557 | 0.471664958 |
| g_MGYG-HGUT-01171 | g_unclassified_Cordycipitaceae | 0.041171025  | 0.266263755 | 0.644465474 |
| g_MGYG-HGUT-01171 | g_unidentified                 | 0.063006893  | 0.088700189 | 0.465955266 |
| g_UBA7185         | g_Verticillium                 | 0.035083575  | 0.34352498  | 0.695595358 |
| g_UBA7185         | g_unclassified_Tremellomycetes | -0.033358494 | 0.367789765 | 0.716103178 |
| g_UBA7185         | g_Candida                      | -0.050186873 | 0.175278951 | 0.570357274 |
| g_UBA7185         | g_Cladosporium                 | 0.037705874  | 0.308643944 | 0.671651258 |
| g_UBA7185         | g_Debaromyces                  | -0.09967497  | 0.006996296 | 0.15915076  |
| g_UBA7185         | g_AspERGILLUS                  | 0.034407166  | 0.352914995 | 0.704818603 |
| g_UBA7185         | g_Kazachstania                 | -0.063018653 | 0.088640554 | 0.465955266 |
| g_UBA7185         | g_Malassezia                   | 0.049362936  | 0.18248092  | 0.575048568 |
| g_UBA7185         | g_unclassified_Fungi           | 0.044729951  | 0.227086043 | 0.612967811 |
| g_UBA7185         | g_Mycosphaerella               | -0.004842532 | 0.89600924  | 0.965025114 |
| g_UBA7185         | g_Simplicillium                | -0.020369077 | 0.582433536 | 0.838552014 |
| g_UBA7185         | g_unclassified_Cordycipitaceae | 0.044565853  | 0.228797039 | 0.613524642 |
| g_UBA7185         | g_unidentified                 | 0.044555284  | 0.228907552 | 0.613524642 |
| g_MGYG-HGUT-01181 | g_Verticillium                 | -0.004496186 | 0.903409067 | 0.967011405 |
| g_MGYG-HGUT-01181 | g_unclassified_Tremellomycetes | -0.034573309 | 0.350593689 | 0.702774112 |
| g_MGYG-HGUT-01181 | g_Candida                      | -0.013457432 | 0.716423721 | 0.903168431 |
| g_MGYG-HGUT-01181 | g_Cladosporium                 | 0.023184878  | 0.531405991 | 0.811448513 |
| g_MGYG-HGUT-01181 | g_Debaromyces                  | -0.059713763 | 0.106710084 | 0.487777626 |
| g_MGYG-HGUT-01181 | g_AspERGILLUS                  | 0.045974483  | 0.214405607 | 0.601936086 |
| g_MGYG-HGUT-01181 | g_Kazachstania                 | -0.110969008 | 0.002660881 | 0.098452591 |
| g_MGYG-HGUT-01181 | g_Malassezia                   | 0.015453419  | 0.676587598 | 0.884589212 |
| g_MGYG-HGUT-01181 | g_unclassified_Fungi           | 0.027646767  | 0.45545636  | 0.766096335 |
| g_MGYG-HGUT-01181 | g_Mycosphaerella               | -0.02036254  | 0.582554617 | 0.838606035 |
| g_MGYG-HGUT-01181 | g_Simplicillium                | -0.000788605 | 0.983018276 | 0.993395456 |
| g_MGYG-HGUT-01181 | g_unclassified_Cordycipitaceae | 0.022738187  | 0.539347558 | 0.815222949 |
| g_MGYG-HGUT-01181 | g_unidentified                 | 0.028249707  | 0.445682435 | 0.761797014 |
| g_MGYG-HGUT-04556 | g_Verticillium                 | 0.051486597  | 0.164351656 | 0.561723687 |
| g_MGYG-HGUT-04556 | g_unclassified_Tremellomycetes | -0.021507961 | 0.561521531 | 0.827118713 |
| g_MGYG-HGUT-04556 | g_Candida                      | -0.017475673 | 0.637128508 | 0.863812758 |
| g_MGYG-HGUT-04556 | g_Cladosporium                 | 0.058323799  | 0.115130933 | 0.498084846 |
| g_MGYG-HGUT-04556 | g_Debaromyces                  | -0.100274961 | 0.006660928 | 0.155255379 |
| g_MGYG-HGUT-04556 | g_AspERGILLUS                  | 0.019669827  | 0.595450232 | 0.844985162 |
| g_MGYG-HGUT-04556 | g_Kazachstania                 | -0.020682    | 0.576651666 | 0.836262521 |
| g_MGYG-HGUT-04556 | g_Malassezia                   | 0.03373819   | 0.3623596   | 0.712995406 |
| g_MGYG-HGUT-04556 | g_unclassified_Fungi           | 0.002194528  | 0.952767313 | 0.982764763 |
| g_MGYG-HGUT-04556 | g_Mycosphaerella               | -0.031987739 | 0.387811053 | 0.727338873 |
| g_MGYG-HGUT-04556 | g_Simplicillium                | 0.010768748  | 0.771307602 | 0.917834971 |
| g_MGYG-HGUT-04556 | g_unclassified_Cordycipitaceae | 0.051218567  | 0.166562116 | 0.562541523 |
| g_MGYG-HGUT-04556 | g_unidentified                 | 0.001158525  | 0.975054646 | 0.990490577 |
| g_UBA7702         | g_Verticillium                 | 0.054186353  | 0.14330183  | 0.538440191 |
| g_UBA7702         | g_unclassified_Tremellomycetes | 0.002827724  | 0.939162509 | 0.978000513 |
| g_UBA7702         | g_Candida                      | -0.002681089 | 0.942311668 | 0.978849717 |
| g_UBA7702         | g_Cladosporium                 | 0.018252889  | 0.622224523 | 0.856123107 |
| g_UBA7702         | g_Debaromyces                  | -0.091428085 | 0.013402429 | 0.224405865 |
| g_UBA7702         | g_AspERGILLUS                  | -0.002715805 | 0.941566017 | 0.978613814 |
| g_UBA7702         | g_Kazachstania                 | 0.012609934  | 0.733581667 | 0.907315107 |
| g_UBA7702         | g_Malassezia                   | 0.049243862  | 0.183539585 | 0.575758478 |
| g_UBA7702         | g_unclassified_Fungi           | 0.016008165  | 0.665668777 | 0.879421986 |
| g_UBA7702         | g_Mycosphaerella               | -0.058375469 | 0.114808831 | 0.497912726 |
| g_UBA7702         | g_Simplicillium                | 0.062261695  | 0.092545263 | 0.471664958 |
| g_UBA7702         | g_unclassified_Cordycipitaceae | 0.053033547  | 0.15202282  | 0.549046238 |
| g_UBA7702         | g_unidentified                 | -0.006803799 | 0.854294545 | 0.950193912 |
| g_MGYG-HGUT-04118 | g_Verticillium                 | 0.074094734  | 0.04521753  | 0.369777359 |
| g_MGYG-HGUT-04118 | g_unclassified_Tremellomycetes | -0.020022712 | 0.588864638 | 0.84209243  |
| g_MGYG-HGUT-04118 | g_Candida                      | -0.049434128 | 0.181850121 | 0.575010893 |
| g_MGYG-HGUT-04118 | g_Cladosporium                 | 0.046210148  | 0.212062958 | 0.600680647 |
| g_MGYG-HGUT-04118 | g_Debaromyces                  | -0.010353445 | 0.779895932 | 0.921371303 |
| g_MGYG-HGUT-04118 | g_AspERGILLUS                  | 0.028953938  | 0.434419028 | 0.754622456 |
| g_MGYG-HGUT-04118 | g_Kazachstania                 | -0.031398949 | 0.396610662 | 0.732625333 |
| g_MGYG-HGUT-04118 | g_Malassezia                   | 0.081441813  | 0.027677067 | 0.306773283 |
| g_MGYG-HGUT-04118 | g_unclassified_Fungi           | -0.039809531 | 0.282412824 | 0.657175895 |
| g_MGYG-HGUT-04118 | g_Mycosphaerella               | 0.033146198  | 0.370847818 | 0.717555606 |
| g_MGYG-HGUT-04118 | g_Simplicillium                | -0.015677353 | 0.672171669 | 0.881783585 |
| g_MGYG-HGUT-04118 | g_unclassified_Cordycipitaceae | 0.054684244  | 0.139655891 | 0.533896229 |
| g_MGYG-HGUT-04118 | g_unidentified                 | -0.020410036 | 0.581675208 | 0.838252356 |
| g_Treponema_D     | g_Verticillium                 | 0.059208241  | 0.109714484 | 0.492584069 |
| g_Treponema_D     | g_unclassified_Tremellomycetes | -0.035476825 | 0.33813973  | 0.692780403 |
| g_Treponema_D     | g_Candida                      | -0.014805522 | 0.689426157 | 0.891576094 |
| g_Treponema_D     | g_Cladosporium                 | -0.02811904  | 0.447790429 | 0.762502994 |
| g_Treponema_D     | g_Debaromyces                  | -0.025952128 | 0.483561917 | 0.780693276 |
| g_Treponema_D     | g_AspERGILLUS                  | 0.098056912  | 0.007977399 | 0.17196221  |
| g_Treponema_D     | g_Kazachstania                 | -0.0706369   | 0.056271472 | 0.40425303  |

|                   |                                |              |             |             |
|-------------------|--------------------------------|--------------|-------------|-------------|
| g Treponema D     | g Malassezia                   | 0.026193478  | 0.479502633 | 0.780189053 |
| g Treponema D     | g unclassified Fungi           | 0.069735088  | 0.059497866 | 0.412336263 |
| g Treponema D     | g Mycosphaerella               | 0.065162475  | 0.078296795 | 0.450277002 |
| g Treponema D     | g Simplicillium                | 0.041880965  | 0.258099483 | 0.637448375 |
| g Treponema D     | g unclassified Cordycipitaceae | -0.012383267 | 0.738193644 | 0.907794719 |
| g Treponema D     | g unidentified                 | 0.054573464  | 0.140460877 | 0.534468538 |
| g UBA5920         | g Verticillium                 | 0.025909347  | 0.484283394 | 0.781124079 |
| g UBA5920         | g unclassified Tremellomycetes | -0.048439109 | 0.190813797 | 0.580402598 |
| g UBA5920         | g Candida                      | -0.064370121 | 0.081999356 | 0.454064461 |
| g UBA5920         | g Cladosporium                 | 0.08006997   | 0.030416469 | 0.315608804 |
| g UBA5920         | g Debaryomyces                 | -0.029139532 | 0.431478205 | 0.753274911 |
| g UBA5920         | g Aspergillus                  | -0.039487698 | 0.286325037 | 0.659056958 |
| g UBA5920         | g Kazachstania                 | 0.004846354  | 0.89592763  | 0.965025114 |
| g UBA5920         | g Malassezia                   | -0.04467633  | 0.227644124 | 0.612967811 |
| g UBA5920         | g unclassified Fungi           | 0.038932397  | 0.293160841 | 0.662256281 |
| g UBA5920         | g Mycosphaerella               | -0.013717347 | 0.711189671 | 0.902091837 |
| g UBA5920         | g Simplicillium                | -0.014758989 | 0.690351736 | 0.892523161 |
| g UBA5920         | g unclassified Cordycipitaceae | 0.077297433  | 0.036667958 | 0.340074045 |
| g UBA5920         | g unidentified                 | 0.035728977  | 0.334715322 | 0.690008638 |
| g Brachyspira     | g Verticillium                 | -0.03448225  | 0.351864739 | 0.703759772 |
| g Brachyspira     | g unclassified Tremellomycetes | -0.039204354 | 0.289799487 | 0.660061436 |
| g Brachyspira     | g Candida                      | -0.030313699 | 0.413141768 | 0.742811081 |
| g Brachyspira     | g Cladosporium                 | -0.008871189 | 0.810760782 | 0.933972414 |
| g Brachyspira     | g Debaryomyces                 | 0.022298623  | 0.547219908 | 0.816368923 |
| g Brachyspira     | g Aspergillus                  | 0.0940435    | 0.010960869 | 0.202776082 |
| g Brachyspira     | g Kazachstania                 | -0.016289581 | 0.66015654  | 0.876069289 |
| g Brachyspira     | g Malassezia                   | -0.024401269 | 0.510084287 | 0.798892628 |
| g Brachyspira     | g unclassified Fungi           | 0.091255768  | 0.013578964 | 0.225653879 |
| g Brachyspira     | g Mycosphaerella               | 0.010141844  | 0.784282174 | 0.923685117 |
| g Brachyspira     | g Simplicillium                | 0.048742078  | 0.188050773 | 0.578138663 |
| g Brachyspira     | g unclassified Cordycipitaceae | 0.018126843  | 0.624631345 | 0.8570016   |
| g Brachyspira     | g unidentified                 | 0.016811807  | 0.649976225 | 0.870052588 |
| g TM7x            | g Verticillium                 | 0.012971763  | 0.726239452 | 0.907006477 |
| g TM7x            | g unclassified Tremellomycetes | 0.0262226    | 0.479014092 | 0.780189053 |
| g TM7x            | g Candida                      | 0.011945548  | 0.747126426 | 0.90996433  |
| g TM7x            | g Cladosporium                 | 0.007632872  | 0.836775376 | 0.943700827 |
| g TM7x            | g Debaryomyces                 | 0.072346716  | 0.050553067 | 0.386038256 |
| g TM7x            | g Aspergillus                  | 0.017950803  | 0.62799947  | 0.85938875  |
| g TM7x            | g Kazachstania                 | 0.031530011  | 0.394641572 | 0.730981467 |
| g TM7x            | g Malassezia                   | -0.017686792 | 0.63306521  | 0.861620071 |
| g TM7x            | g unclassified Fungi           | 0.017396653  | 0.638652167 | 0.86388896  |
| g TM7x            | g Mycosphaerella               | 0.022058211  | 0.551549436 | 0.819847749 |
| g TM7x            | g Simplicillium                | -0.055449473 | 0.13419175  | 0.52297511  |
| g TM7x            | g unclassified Cordycipitaceae | 0.025808047  | 0.485994076 | 0.782411275 |
| g TM7x            | g unidentified                 | -0.035863646 | 0.332895596 | 0.688465429 |
| g Paenibacillus   | g Verticillium                 | -0.017779983 | 0.631275129 | 0.860229872 |
| g Paenibacillus   | g unclassified Tremellomycetes | -0.025560784 | 0.490183316 | 0.785111149 |
| g Paenibacillus   | g Candida                      | -0.02604836  | 0.481941154 | 0.780189053 |
| g Paenibacillus   | g Cladosporium                 | 0.000945597  | 0.979638305 | 0.992582588 |
| g Paenibacillus   | g Debaryomyces                 | 0.014390586  | 0.697695842 | 0.895302916 |
| g Paenibacillus   | g Aspergillus                  | 0.021526578  | 0.561182721 | 0.826964057 |
| g Paenibacillus   | g Kazachstania                 | -0.020642254 | 0.57738455  | 0.836262521 |
| g Paenibacillus   | g Malassezia                   | -0.049829988 | 0.178372033 | 0.573729188 |
| g Paenibacillus   | g unclassified Fungi           | -0.044355994 | 0.230998488 | 0.616345437 |
| g Paenibacillus   | g Mycosphaerella               | 0.051452421  | 0.164632273 | 0.561723687 |
| g Paenibacillus   | g Simplicillium                | -0.002581765 | 0.94444527  | 0.98000783  |
| g Paenibacillus   | g unclassified Cordycipitaceae | -0.036024834 | 0.33072592  | 0.686878237 |
| g Paenibacillus   | g unidentified                 | -0.012965435 | 0.72636764  | 0.907012052 |
| g UBA4705         | g Verticillium                 | 0.095476307  | 0.009797968 | 0.191675484 |
| g UBA4705         | g unclassified Tremellomycetes | -0.045244872 | 0.221776298 | 0.608362696 |
| g UBA4705         | g Candida                      | -0.023828232 | 0.520072926 | 0.804338012 |
| g UBA4705         | g Cladosporium                 | 0.039703699  | 0.283695315 | 0.658002559 |
| g UBA4705         | g Debaryomyces                 | -0.075506941 | 0.041260516 | 0.355263449 |
| g UBA4705         | g Aspergillus                  | -0.011733177 | 0.751472723 | 0.910387945 |
| g UBA4705         | g Kazachstania                 | -0.04309527  | 0.244539932 | 0.628392803 |
| g UBA4705         | g Malassezia                   | 0.070929267  | 0.055257209 | 0.400940701 |
| g UBA4705         | g unclassified Fungi           | 0.071633442  | 0.05287661  | 0.3948767   |
| g UBA4705         | g Mycosphaerella               | 0.057705915  | 0.119037898 | 0.502857899 |
| g UBA4705         | g Simplicillium                | 0.031992816  | 0.387735699 | 0.727338873 |
| g UBA4705         | g unclassified Cordycipitaceae | 0.070194106  | 0.057837005 | 0.407963088 |
| g UBA4705         | g unidentified                 | 0.096286315  | 0.009190275 | 0.184188436 |
| g Campylobacter B | g Verticillium                 | -0.030368417 | 0.41229865  | 0.742502435 |
| g Campylobacter B | g unclassified Tremellomycetes | -0.028555275 | 0.440774944 | 0.758913189 |
| g Campylobacter B | g Candida                      | 0.04257717   | 0.250263001 | 0.631891676 |
| g Campylobacter B | g Cladosporium                 | 0.010293272  | 0.781142552 | 0.921874185 |
| g Campylobacter B | g Debaryomyces                 | 0.023380536  | 0.527946184 | 0.808944748 |
| g Campylobacter B | g Aspergillus                  | 0.101811462  | 0.005866898 | 0.147466785 |
| g Campylobacter B | g Kazachstania                 | 0.00649576   | 0.860822516 | 0.953015155 |

|                           |                                |              |             |             |
|---------------------------|--------------------------------|--------------|-------------|-------------|
| g Campylobacter B         | g Malassezia                   | -0.061757826 | 0.095219994 | 0.474839952 |
| g Campylobacter B         | g unclassified Fungi           | 0.080081689  | 0.030392117 | 0.315608804 |
| g Campylobacter B         | g Mycosphaerella               | 0.016185796  | 0.662187307 | 0.877059015 |
| g Campylobacter B         | g Simplicillium                | -0.035191264 | 0.34204486  | 0.695087772 |
| g Campylobacter B         | g unclassified Cordycipitaceae | -0.002070155 | 0.955441324 | 0.983509737 |
| g Campylobacter B         | g unidentified                 | 0.022645961  | 0.54099457  | 0.815420595 |
| g UBA4248                 | g Verticillium                 | 0.000269221  | 0.994202253 | 0.997274144 |
| g UBA4248                 | g unclassified Tremellomycetes | 0.028598632  | 0.440081133 | 0.758246834 |
| g UBA4248                 | g Candida                      | -0.002165481 | 0.953391779 | 0.982873945 |
| g UBA4248                 | g Cladosporium                 | 0.010891641  | 0.768771507 | 0.917048821 |
| g UBA4248                 | g Debaryomyces                 | -0.078383737 | 0.034099248 | 0.329231974 |
| g UBA4248                 | g Aspergillus                  | -0.050330264 | 0.174047501 | 0.569281535 |
| g UBA4248                 | g Kazachstania                 | -0.039880825 | 0.281551083 | 0.657094722 |
| g UBA4248                 | g Malassezia                   | 0.037995766  | 0.304936645 | 0.670057703 |
| g UBA4248                 | g unclassified Fungi           | -0.009516816 | 0.797277784 | 0.929238701 |
| g UBA4248                 | g Mycosphaerella               | -0.028304941 | 0.444793075 | 0.76170364  |
| g UBA4248                 | g Simplicillium                | 0.053760473  | 0.146477897 | 0.541068386 |
| g UBA4248                 | g unclassified Cordycipitaceae | 0.028065365  | 0.448657972 | 0.762723397 |
| g UBA4248                 | g unidentified                 | 0.000633314  | 0.986361936 | 0.994633314 |
| g Methanobrevibacter A    | g Verticillium                 | 0.079966845  | 0.03063148  | 0.315608804 |
| g Methanobrevibacter A    | g unclassified Tremellomycetes | -0.07892574  | 0.032876076 | 0.325681065 |
| g Methanobrevibacter A    | g Candida                      | -0.069702381 | 0.059617698 | 0.412336263 |
| g Methanobrevibacter A    | g Cladosporium                 | 0.038421056  | 0.299551397 | 0.667308015 |
| g Methanobrevibacter A    | g Debaryomyces                 | -0.046611514 | 0.208115738 | 0.597903264 |
| g Methanobrevibacter A    | g Aspergillus                  | -0.011236094 | 0.761676416 | 0.914666261 |
| g Methanobrevibacter A    | g Kazachstania                 | -0.004632608 | 0.900493303 | 0.96604016  |
| g Methanobrevibacter A    | g Malassezia                   | 0.065626115  | 0.076194016 | 0.4465963   |
| g Methanobrevibacter A    | g unclassified Fungi           | 0.017719799  | 0.632430936 | 0.860867529 |
| g Methanobrevibacter A    | g Mycosphaerella               | 0.059478673  | 0.10809907  | 0.489894799 |
| g Methanobrevibacter A    | g Simplicillium                | 0.018148034  | 0.624226428 | 0.8570016   |
| g Methanobrevibacter A    | g unclassified Cordycipitaceae | 0.104892581  | 0.004526032 | 0.131940686 |
| g Methanobrevibacter A    | g unidentified                 | 0.026741504  | 0.470354636 | 0.773592285 |
| g Methanosphaera          | g Verticillium                 | -0.011821079 | 0.749672789 | 0.910387945 |
| g Methanosphaera          | g unclassified Tremellomycetes | -0.062689353 | 0.090322627 | 0.468756273 |
| g Methanosphaera          | g Candida                      | -0.051720661 | 0.162439416 | 0.560460432 |
| g Methanosphaera          | g Cladosporium                 | 0.05305402   | 0.151864503 | 0.548993338 |
| g Methanosphaera          | g Debaryomyces                 | -0.066549298 | 0.072143936 | 0.442158914 |
| g Methanosphaera          | g Aspergillus                  | -0.015255015 | 0.680509385 | 0.886595465 |
| g Methanosphaera          | g Kazachstania                 | 0.000573284  | 0.98765454  | 0.995158517 |
| g Methanosphaera          | g Malassezia                   | -0.014649136 | 0.69253865  | 0.893516353 |
| g Methanosphaera          | g unclassified Fungi           | 0.035643018  | 0.335880196 | 0.691226029 |
| g Methanosphaera          | g Mycosphaerella               | -0.077050591 | 0.037274056 | 0.341376127 |
| g Methanosphaera          | g Simplicillium                | 0.004190543  | 0.90994624  | 0.969320838 |
| g Methanosphaera          | g unclassified Cordycipitaceae | 0.056478409  | 0.127106508 | 0.514159428 |
| g Methanosphaera          | g unidentified                 | -0.013168439 | 0.722258971 | 0.905687198 |
| g Methanomassiliococcus A | g Verticillium                 | 0.041901479  | 0.257866167 | 0.637448375 |
| g Methanomassiliococcus A | g unclassified Tremellomycetes | -0.043470143 | 0.240456578 | 0.624103143 |
| g Methanomassiliococcus A | g Candida                      | -0.056143633 | 0.129379164 | 0.517223391 |
| g Methanomassiliococcus A | g Cladosporium                 | -0.004638611 | 0.900365033 | 0.96604016  |
| g Methanomassiliococcus A | g Debaryomyces                 | -0.081909014 | 0.026793913 | 0.303894087 |
| g Methanomassiliococcus A | g Aspergillus                  | 0.03816103   | 0.302836416 | 0.668756962 |
| g Methanomassiliococcus A | g Kazachstania                 | -0.066119307 | 0.074007902 | 0.444193078 |
| g Methanomassiliococcus A | g Malassezia                   | 0.01688659   | 0.648523657 | 0.869904594 |
| g Methanomassiliococcus A | g unclassified Fungi           | 0.003811058  | 0.91807119  | 0.971502933 |
| g Methanomassiliococcus A | g Mycosphaerella               | -0.014456615 | 0.696377455 | 0.895302916 |
| g Methanomassiliococcus A | g Simplicillium                | 0.04594701   | 0.214679918 | 0.602105193 |
| g Methanomassiliococcus A | g unclassified Cordycipitaceae | 0.075286593  | 0.041857951 | 0.357109759 |
| g Methanomassiliococcus A | g unidentified                 | 0.036287403  | 0.327211202 | 0.682858146 |
| g Fusobacterium C         | g Verticillium                 | -0.056560034 | 0.126557115 | 0.5134831   |
| g Fusobacterium C         | g unclassified Tremellomycetes | -0.029001604 | 0.433662626 | 0.754276448 |
| g Fusobacterium C         | g Candida                      | -0.012336611 | 0.739144132 | 0.908534631 |
| g Fusobacterium C         | g Cladosporium                 | -0.024685565 | 0.50516615  | 0.795660555 |
| g Fusobacterium C         | g Debaryomyces                 | -0.009376021 | 0.800213098 | 0.929951672 |
| g Fusobacterium C         | g Aspergillus                  | 0.078453943  | 0.033938653 | 0.329183157 |
| g Fusobacterium C         | g Kazachstania                 | -0.048527421 | 0.190005343 | 0.580115304 |
| g Fusobacterium C         | g Malassezia                   | -0.029178134 | 0.430867988 | 0.753212133 |
| g Fusobacterium C         | g unclassified Fungi           | -0.023777342 | 0.520964838 | 0.804795608 |
| g Fusobacterium C         | g Mycosphaerella               | -0.033758306 | 0.362073315 | 0.712813887 |
| g Fusobacterium C         | g Simplicillium                | 0.056795479  | 0.124982754 | 0.510338337 |
| g Fusobacterium C         | g unclassified Cordycipitaceae | -0.018313702 | 0.621064757 | 0.856123107 |
| g Fusobacterium C         | g unidentified                 | 0.032055611  | 0.386804392 | 0.727027367 |
| g MGYG-HGUT-01990         | g Verticillium                 | -0.096109539 | 0.009319958 | 0.186082632 |
| g MGYG-HGUT-01990         | g unclassified Tremellomycetes | -0.000874439 | 0.98117026  | 0.993008299 |
| g MGYG-HGUT-01990         | g Candida                      | -0.075980972 | 0.03999967  | 0.350685903 |
| g MGYG-HGUT-01990         | g Cladosporium                 | -0.003397005 | 0.926945977 | 0.974172444 |
| g MGYG-HGUT-01990         | g Debaryomyces                 | 0.024745666  | 0.504129636 | 0.795013039 |
| g MGYG-HGUT-01990         | g Aspergillus                  | 0.082733782  | 0.025294047 | 0.295758678 |
| g MGYG-HGUT-01990         | g Kazachstania                 | -0.007946354 | 0.830171676 | 0.940630371 |





| Correlations of Case Group |                                |              |             |                               |
|----------------------------|--------------------------------|--------------|-------------|-------------------------------|
| Node1 (Bacteria)           | Node2 (Fungi)                  | Correlations | P values    | False discovery rate-p values |
| g Bacteroides              | g Verticillium                 | 0.147725986  | 0.055274214 | 0.832568254                   |
| g Bacteroides              | g unclassified Tremellomycetes | 0.118591986  | 0.124617323 | 0.849176369                   |
| g Bacteroides              | g Candida                      | -0.078474361 | 0.310506316 | 0.897967316                   |
| g Bacteroides              | g Cladosporium                 | 0.014746991  | 0.849075304 | 0.994526835                   |
| g Bacteroides              | g Debaryomyces                 | -0.097056929 | 0.209354733 | 0.874689648                   |
| g Bacteroides              | g Aspergillus                  | -0.108848185 | 0.158919874 | 0.85940316                    |
| g Bacteroides              | g Kazachstania                 | -0.098294808 | 0.203575693 | 0.874689648                   |
| g Bacteroides              | g Malassezia                   | -0.002205414 | 0.977297158 | 0.998625698                   |
| g Bacteroides              | g unclassified Fungi           | -0.131484077 | 0.088378662 | 0.8415005                     |
| g Bacteroides              | g Fusarium                     | -0.011061889 | 0.886494227 | 0.994526835                   |
| g Bacteroides              | g Mycosphaerella               | 0.012667712  | 0.870152642 | 0.994526835                   |
| g Bacteroides              | g Simplicillium                | -0.014326681 | 0.853327816 | 0.994526835                   |
| g Bacteroides              | g unclassified Cordycipitaceae | 0.145147605  | 0.059714143 | 0.832568254                   |
| g Bacteroides              | g unidentified                 | -0.044003382 | 0.569984943 | 0.942564508                   |
| g Prevotella               | g Verticillium                 | 0.004506329  | 0.953630911 | 0.99717368                    |
| g Prevotella               | g unclassified Tremellomycetes | -0.227366629 | 0.002950336 | 0.550026842                   |
| g Prevotella               | g Candida                      | 0.051338825  | 0.507401814 | 0.936546622                   |
| g Prevotella               | g Cladosporium                 | -0.006250182 | 0.935720204 | 0.996251765                   |
| g Prevotella               | g Debaryomyces                 | 0.076158126  | 0.325047753 | 0.899370541                   |
| g Prevotella               | g Aspergillus                  | 0.089051411  | 0.249581915 | 0.874689648                   |
| g Prevotella               | g Kazachstania                 | 0.014880106  | 0.847729413 | 0.994526835                   |
| g Prevotella               | g Malassezia                   | 0.012884955  | 0.86794594  | 0.994526835                   |
| g Prevotella               | g unclassified Fungi           | 0.162016129  | 0.035334639 | 0.808354944                   |
| g Prevotella               | g Fusarium                     | 0.037326236  | 0.629942561 | 0.953862502                   |
| g Prevotella               | g Mycosphaerella               | 6.97E-05     | 0.999282576 | 0.999607616                   |
| g Prevotella               | g Simplicillium                | 0.00050026   | 0.994849596 | 0.999049974                   |
| g Prevotella               | g unclassified Cordycipitaceae | -0.066257178 | 0.392057716 | 0.907694413                   |
| g Prevotella               | g unidentified                 | 0.151790609  | 0.048831107 | 0.832568254                   |
| g Bacteroides B            | g Verticillium                 | 0.068304562  | 0.377560426 | 0.90453713                    |
| g Bacteroides B            | g unclassified Tremellomycetes | 0.071192832  | 0.357674297 | 0.900151743                   |
| g Bacteroides B            | g Candida                      | -0.014570655 | 0.850858876 | 0.994526835                   |
| g Bacteroides B            | g Cladosporium                 | -0.038406934 | 0.62005844  | 0.952309753                   |
| g Bacteroides B            | g Debaryomyces                 | -0.047569416 | 0.5391092   | 0.941536464                   |
| g Bacteroides B            | g Aspergillus                  | -0.012970485 | 0.867077422 | 0.994526835                   |
| g Bacteroides B            | g Kazachstania                 | -0.054532562 | 0.481316896 | 0.932872225                   |
| g Bacteroides B            | g Malassezia                   | -0.041708637 | 0.59028539  | 0.947252808                   |
| g Bacteroides B            | g unclassified Fungi           | -0.145882437 | 0.058419884 | 0.832568254                   |
| g Bacteroides B            | g Fusarium                     | -0.0906582   | 0.241106639 | 0.874689648                   |
| g Bacteroides B            | g Mycosphaerella               | 0.039036108  | 0.614335002 | 0.951172976                   |
| g Bacteroides B            | g Simplicillium                | -0.022343714 | 0.773079979 | 0.984510076                   |
| g Bacteroides B            | g unclassified Cordycipitaceae | 0.110264783  | 0.153534031 | 0.85006873                    |
| g Bacteroides B            | g unidentified                 | -0.095610212 | 0.216256831 | 0.874689648                   |
| g Bacteroides A            | g Verticillium                 | -0.002952261 | 0.969612233 | 0.998625698                   |
| g Bacteroides A            | g unclassified Tremellomycetes | 0.054342374  | 0.48284973  | 0.932872225                   |
| g Bacteroides A            | g Candida                      | -0.0893822   | 0.247820463 | 0.874689648                   |
| g Bacteroides A            | g Cladosporium                 | -0.103008225 | 0.182624881 | 0.872371283                   |
| g Bacteroides A            | g Debaryomyces                 | 0.01312031   | 0.8655564   | 0.994526835                   |
| g Bacteroides A            | g Aspergillus                  | 0.065472734  | 0.397699768 | 0.909588897                   |
| g Bacteroides A            | g Kazachstania                 | 0.075260122  | 0.330801707 | 0.900151743                   |
| g Bacteroides A            | g Malassezia                   | 0.000263755  | 0.997284507 | 0.999334917                   |
| g Bacteroides A            | g unclassified Fungi           | -0.114868656 | 0.136978697 | 0.849249996                   |
| g Bacteroides A            | g Fusarium                     | -0.048374987 | 0.532251149 | 0.940412658                   |
| g Bacteroides A            | g Mycosphaerella               | 0.002690475  | 0.97230568  | 0.998625698                   |
| g Bacteroides A            | g Simplicillium                | -0.011625013 | 0.880757813 | 0.994526835                   |
| g Bacteroides A            | g unclassified Cordycipitaceae | 0.03485048   | 0.652832685 | 0.955763754                   |
| g Bacteroides A            | g unidentified                 | -0.090861139 | 0.240050665 | 0.874689648                   |
| g Paraprevotella           | g Verticillium                 | 0.157878398  | 0.040358391 | 0.808354944                   |
| g Paraprevotella           | g unclassified Tremellomycetes | -0.088864068 | 0.250583353 | 0.874689648                   |
| g Paraprevotella           | g Candida                      | -0.144425523 | 0.061008814 | 0.832568254                   |
| g Paraprevotella           | g Cladosporium                 | 0.039390758  | 0.611119044 | 0.951172976                   |
| g Paraprevotella           | g Debaryomyces                 | -0.108042308 | 0.162046353 | 0.859887758                   |
| g Paraprevotella           | g Aspergillus                  | 0.072529119  | 0.348699072 | 0.900151743                   |
| g Paraprevotella           | g Kazachstania                 | -0.003265898 | 0.966385757 | 0.998625698                   |
| g Paraprevotella           | g Malassezia                   | -0.027531351 | 0.722350898 | 0.971987582                   |
| g Paraprevotella           | g unclassified Fungi           | -0.008416061 | 0.913520781 | 0.996251765                   |
| g Paraprevotella           | g Fusarium                     | -0.070926696 | 0.359478862 | 0.900151743                   |
| g Paraprevotella           | g Mycosphaerella               | -0.091174654 | 0.238425672 | 0.874689648                   |
| g Paraprevotella           | g Simplicillium                | 0.074048298  | 0.338669325 | 0.900151743                   |
| g Paraprevotella           | g unclassified Cordycipitaceae | 0.192767262  | 0.01203993  | 0.659702633                   |
| g Paraprevotella           | g unidentified                 | -0.022043281 | 0.776049889 | 0.984510076                   |
| g Prevotellamassilia       | g Verticillium                 | -0.009287023 | 0.904611599 | 0.995453822                   |
| g Prevotellamassilia       | g unclassified Tremellomycetes | -0.260914721 | 0.000611952 | 0.534709451                   |
| g Prevotellamassilia       | g Candida                      | -0.000662411 | 0.993180214 | 0.999049974                   |

|   |                    |   |                              |              |             |             |
|---|--------------------|---|------------------------------|--------------|-------------|-------------|
| g | Prevotellamassilia | g | Cladosporium                 | 0.004302445  | 0.955726642 | 0.99717368  |
| g | Prevotellamassilia | g | Debaryomyces                 | 0.036769711  | 0.635058452 | 0.954116909 |
| g | Prevotellamassilia | g | Aspergillus                  | 0.090224694  | 0.243373199 | 0.874689648 |
| g | Prevotellamassilia | g | Kazachstania                 | -0.076187188 | 0.324862623 | 0.899370541 |
| g | Prevotellamassilia | g | Malassezia                   | 0.017611789  | 0.820212518 | 0.992484281 |
| g | Prevotellamassilia | g | unclassified Fungi           | 0.135517113  | 0.0789586   | 0.8415005   |
| g | Prevotellamassilia | g | Fusarium                     | -0.001381572 | 0.985776752 | 0.999049974 |
| g | Prevotellamassilia | g | Mycosphaerella               | -0.055085509 | 0.476875318 | 0.931734791 |
| g | Prevotellamassilia | g | Simplicillium                | 0.056463717  | 0.465902245 | 0.927602832 |
| g | Prevotellamassilia | g | unclassified Cordycipitaceae | -0.02068917  | 0.789475597 | 0.986710331 |
| g | Prevotellamassilia | g | unidentified                 | 0.170969178  | 0.02624996  | 0.765986149 |
| g | CAG-462            | g | Verticillium                 | 0.116727169  | 0.130696152 | 0.849249996 |
| g | CAG-462            | g | unclassified Tremellomycetes | 0.113256833  | 0.142612029 | 0.849249996 |
| g | CAG-462            | g | Candida                      | -0.05208315  | 0.501257503 | 0.936281889 |
| g | CAG-462            | g | Cladosporium                 | 0.031358476  | 0.6856729   | 0.963892039 |
| g | CAG-462            | g | Debaryomyces                 | -0.110955933 | 0.150956767 | 0.84984956  |
| g | CAG-462            | g | Aspergillus                  | -0.085850741 | 0.267073629 | 0.878752247 |
| g | CAG-462            | g | Kazachstania                 | -0.052643986 | 0.496653805 | 0.935069491 |
| g | CAG-462            | g | Malassezia                   | -0.008928427 | 0.908278346 | 0.996251765 |
| g | CAG-462            | g | unclassified Fungi           | -0.178218117 | 0.020436769 | 0.719655082 |
| g | CAG-462            | g | Fusarium                     | -0.024839989 | 0.748534224 | 0.979154508 |
| g | CAG-462            | g | Mycosphaerella               | -0.004669072 | 0.951958289 | 0.99717368  |
| g | CAG-462            | g | Simplicillium                | 0.036572336  | 0.636877006 | 0.954338328 |
| g | CAG-462            | g | unclassified Cordycipitaceae | 0.153417382  | 0.046433723 | 0.828771778 |
| g | CAG-462            | g | unidentified                 | -0.080701322 | 0.296932915 | 0.892181547 |
| g | MGYG-HGUT-03221    | g | Verticillium                 | 0.056456799  | 0.465956979 | 0.927602832 |
| g | MGYG-HGUT-03221    | g | unclassified Tremellomycetes | 0.074010835  | 0.338914431 | 0.900151743 |
| g | MGYG-HGUT-03221    | g | Candida                      | -0.007906793 | 0.918735215 | 0.996251765 |
| g | MGYG-HGUT-03221    | g | Cladosporium                 | -0.015923474 | 0.837195677 | 0.994526835 |
| g | MGYG-HGUT-03221    | g | Debaryomyces                 | -0.042298806 | 0.585033039 | 0.945928844 |
| g | MGYG-HGUT-03221    | g | Aspergillus                  | 0.000661419  | 0.993190436 | 0.999049974 |
| g | MGYG-HGUT-03221    | g | Kazachstania                 | -0.09452402  | 0.221544544 | 0.874689648 |
| g | MGYG-HGUT-03221    | g | Malassezia                   | -0.012657681 | 0.87025456  | 0.994526835 |
| g | MGYG-HGUT-03221    | g | unclassified Fungi           | -0.149912526 | 0.051726012 | 0.832568254 |
| g | MGYG-HGUT-03221    | g | Fusarium                     | 0.00480046   | 0.950608089 | 0.99717368  |
| g | MGYG-HGUT-03221    | g | Mycosphaerella               | 0.063179039  | 0.414472974 | 0.915276764 |
| g | MGYG-HGUT-03221    | g | Simplicillium                | 0.004459089  | 0.954116469 | 0.99717368  |
| g | MGYG-HGUT-03221    | g | unclassified Cordycipitaceae | 0.0949236    | 0.219588768 | 0.874689648 |
| g | MGYG-HGUT-03221    | g | unidentified                 | 0.003875948  | 0.960111594 | 0.997919102 |
| g | MGYG-HGUT-02575    | g | Verticillium                 | 0.216394963  | 0.004716015 | 0.613926619 |
| g | MGYG-HGUT-02575    | g | unclassified Tremellomycetes | 0.036239474  | 0.639948802 | 0.955341199 |
| g | MGYG-HGUT-02575    | g | Candida                      | -0.103744559 | 0.179500475 | 0.872371283 |
| g | MGYG-HGUT-02575    | g | Cladosporium                 | 0.004235108  | 0.956418871 | 0.99717368  |
| g | MGYG-HGUT-02575    | g | Debaryomyces                 | -0.113217026 | 0.142753353 | 0.849249996 |
| g | MGYG-HGUT-02575    | g | Aspergillus                  | -0.061422471 | 0.427594125 | 0.918239588 |
| g | MGYG-HGUT-02575    | g | Kazachstania                 | -0.116685745 | 0.130833727 | 0.849249996 |
| g | MGYG-HGUT-02575    | g | Malassezia                   | 0.017265516  | 0.823689223 | 0.992484281 |
| g | MGYG-HGUT-02575    | g | unclassified Fungi           | -0.071112541 | 0.358218124 | 0.900151743 |
| g | MGYG-HGUT-02575    | g | Fusarium                     | -0.014276845 | 0.853832317 | 0.994526835 |
| g | MGYG-HGUT-02575    | g | Mycosphaerella               | -0.00184779  | 0.980977836 | 0.998625698 |
| g | MGYG-HGUT-02575    | g | Simplicillium                | 0.043577917  | 0.573723802 | 0.943352947 |
| g | MGYG-HGUT-02575    | g | unclassified Cordycipitaceae | 0.199452918  | 0.009327269 | 0.613926619 |
| g | MGYG-HGUT-02575    | g | unidentified                 | -0.10920369  | 0.157555124 | 0.855241398 |
| g | MGYG-HGUT-02291    | g | Verticillium                 | 0.112804186  | 0.144225301 | 0.849249996 |
| g | MGYG-HGUT-02291    | g | unclassified Tremellomycetes | 0.08807033   | 0.254857078 | 0.874689648 |
| g | MGYG-HGUT-02291    | g | Candida                      | -0.02009031  | 0.795433229 | 0.987176079 |
| g | MGYG-HGUT-02291    | g | Cladosporium                 | 0.034035102  | 0.660444285 | 0.958360959 |
| g | MGYG-HGUT-02291    | g | Debaryomyces                 | -0.082409161 | 0.286794031 | 0.891214772 |
| g | MGYG-HGUT-02291    | g | Aspergillus                  | -0.080217512 | 0.299847787 | 0.893250141 |
| g | MGYG-HGUT-02291    | g | Kazachstania                 | -0.037404196 | 0.629227305 | 0.953713015 |
| g | MGYG-HGUT-02291    | g | Malassezia                   | -0.023758377 | 0.759140304 | 0.982076388 |
| g | MGYG-HGUT-02291    | g | unclassified Fungi           | -0.120100258 | 0.119862511 | 0.849176369 |
| g | MGYG-HGUT-02291    | g | Fusarium                     | -0.064575797 | 0.40421     | 0.912338681 |
| g | MGYG-HGUT-02291    | g | Mycosphaerella               | 0.011494733  | 0.8820844   | 0.994526835 |
| g | MGYG-HGUT-02291    | g | Simplicillium                | -0.043651949 | 0.573072405 | 0.942985175 |
| g | MGYG-HGUT-02291    | g | unclassified Cordycipitaceae | 0.120117975  | 0.119807509 | 0.849176369 |
| g | MGYG-HGUT-02291    | g | unidentified                 | -0.067181265 | 0.385473383 | 0.906174944 |
| g | CAG-617            | g | Verticillium                 | 0.062158557  | 0.422066788 | 0.916999262 |
| g | CAG-617            | g | unclassified Tremellomycetes | 0.040782331  | 0.59857238  | 0.948266952 |
| g | CAG-617            | g | Candida                      | -0.055677385 | 0.472145796 | 0.928769554 |
| g | CAG-617            | g | Cladosporium                 | -0.025436264 | 0.742707222 | 0.977770666 |
| g | CAG-617            | g | Debaryomyces                 | -0.04005024  | 0.60515862  | 0.95081632  |
| g | CAG-617            | g | Aspergillus                  | 0.046623963  | 0.54721368  | 0.942564508 |
| g | CAG-617            | g | Kazachstania                 | 0.022994251  | 0.766660468 | 0.982494893 |
| g | CAG-617            | g | Malassezia                   | -0.113551174 | 0.141570361 | 0.849249996 |
| g | CAG-617            | g | unclassified Fungi           | -0.147437991 | 0.055756197 | 0.832568254 |
| g | CAG-617            | g | Fusarium                     | 0.050771081  | 0.51211468  | 0.938277062 |
| g | CAG-617            | g | Mycosphaerella               | -0.016910665 | 0.827255625 | 0.993650851 |

|                   |                                       |              |              |             |
|-------------------|---------------------------------------|--------------|--------------|-------------|
| g CAG-617         | g <i>Simplicillium</i>                | -0.004470548 | 0.953998679  | 0.99717368  |
| g CAG-617         | g unclassified <i>Cordycipitaceae</i> | 0.06450082   | 0.404757055  | 0.912338681 |
| g CAG-617         | g unidentified                        | -0.069327472 | 0.370441617  | 0.901117392 |
| g UBA6398         | g <i>Verticillium</i>                 | 0.051072213  | 0.509612157  | 0.937011504 |
| g UBA6398         | g unclassified <i>Tremellomycetes</i> | -0.185569988 | 0.015712579  | 0.702895198 |
| g UBA6398         | g <i>Candida</i>                      | -0.034975148 | 0.651672035  | 0.955597379 |
| g UBA6398         | g <i>Cladosporium</i>                 | -0.070206887 | 0.364387957  | 0.901117392 |
| g UBA6398         | g <i>Debaryomyces</i>                 | -0.092573242 | 0.23127037   | 0.874689648 |
| g UBA6398         | g <i>Aspergillus</i>                  | 0.00178453   | 0.981628952  | 0.998625698 |
| g UBA6398         | g <i>Kazachstania</i>                 | -0.055686259 | 0.472075082  | 0.928769554 |
| g UBA6398         | g <i>Malassezia</i>                   | 0.028779825  | 0.710311382  | 0.968802592 |
| g UBA6398         | g unclassified <i>Fungi</i>           | 0.017071192  | 0.825641827  | 0.993650851 |
| g UBA6398         | g <i>Fusarium</i>                     | 0.000921254  | 0.990515437  | 0.999049974 |
| g UBA6398         | g <i>Mycosphaerella</i>               | -0.060708382 | 0.432995986  | 0.918239588 |
| g UBA6398         | g <i>Simplicillium</i>                | 0.132647624  | 0.085573143  | 0.8415005   |
| g UBA6398         | g unclassified <i>Cordycipitaceae</i> | 0.025482641  | 0.742254615  | 0.977770666 |
| g UBA6398         | g unidentified                        | 0.182855729  | 0.017332351  | 0.702895198 |
| g MGYG-HGUT-03543 | g <i>Verticillium</i>                 | 0.021398362  | 0.782436117  | 0.986171666 |
| g MGYG-HGUT-03543 | g unclassified <i>Tremellomycetes</i> | -0.122667012 | 0.112096019  | 0.843328451 |
| g MGYG-HGUT-03543 | g <i>Candida</i>                      | -0.043180775 | 0.57722412   | 0.943618965 |
| g MGYG-HGUT-03543 | g <i>Cladosporium</i>                 | -0.076665444 | 0.321825819  | 0.898854824 |
| g MGYG-HGUT-03543 | g <i>Debaryomyces</i>                 | -0.008875264 | 0.908822126  | 0.996251765 |
| g MGYG-HGUT-03543 | g <i>Aspergillus</i>                  | -0.012467672 | 0.872185491  | 0.994526835 |
| g MGYG-HGUT-03543 | g <i>Kazachstania</i>                 | -0.024911889 | 0.747830828  | 0.979147232 |
| g MGYG-HGUT-03543 | g <i>Malassezia</i>                   | -0.067479433 | 0.383363242  | 0.905460587 |
| g MGYG-HGUT-03543 | g unclassified <i>Fungi</i>           | 0.141672862  | 0.06615723   | 0.836350979 |
| g MGYG-HGUT-03543 | g <i>Fusarium</i>                     | -0.05492834  | 0.478135524  | 0.931740764 |
| g MGYG-HGUT-03543 | g <i>Mycosphaerella</i>               | -0.129574322 | 0.093142213  | 0.8415005   |
| g MGYG-HGUT-03543 | g <i>Simplicillium</i>                | 0.034360526  | 0.657402209  | 0.956614192 |
| g MGYG-HGUT-03543 | g unclassified <i>Cordycipitaceae</i> | -0.052432713 | 0.498385444  | 0.936096112 |
| g MGYG-HGUT-03543 | g unidentified                        | 0.135961234  | 0.077972697  | 0.8415005   |
| g UBA4334         | g <i>Verticillium</i>                 | 0.007453636  | 0.923378052  | 0.996251765 |
| g UBA4334         | g unclassified <i>Tremellomycetes</i> | -0.272697937 | 0.000334518  | 0.441278828 |
| g UBA4334         | g <i>Candida</i>                      | -0.032738683 | 0.672618159  | 0.961508388 |
| g UBA4334         | g <i>Cladosporium</i>                 | -0.139583617 | 0.070297197  | 0.8415005   |
| g UBA4334         | g <i>Debaryomyces</i>                 | 0.026204498  | 0.735221301  | 0.9748709   |
| g UBA4334         | g <i>Aspergillus</i>                  | 0.122336902  | 0.113072246  | 0.843328451 |
| g UBA4334         | g <i>Kazachstania</i>                 | -0.022793894 | 0.768635926  | 0.98374619  |
| g UBA4334         | g <i>Malassezia</i>                   | 0.013173091  | 0.865020689  | 0.994526835 |
| g UBA4334         | g unclassified <i>Fungi</i>           | 0.174475261  | 0.02328199   | 0.765986149 |
| g UBA4334         | g <i>Fusarium</i>                     | -0.000310559 | 0.99680264   | 0.999334917 |
| g UBA4334         | g <i>Mycosphaerella</i>               | -0.077361321 | 0.317440087  | 0.898525398 |
| g UBA4334         | g <i>Simplicillium</i>                | 0.034467894  | 0.656399755  | 0.956614192 |
| g UBA4334         | g unclassified <i>Cordycipitaceae</i> | -0.08350974  | 0.280384438  | 0.890167523 |
| g UBA4334         | g unidentified                        | 0.244269179  | 0.001371625  | 0.534709451 |
| g 43-108          | g <i>Verticillium</i>                 | -0.017864736 | 0.817675032  | 0.991841934 |
| g 43-108          | g unclassified <i>Tremellomycetes</i> | 0.059476856  | 0.442403426  | 0.92043404  |
| g 43-108          | g <i>Candida</i>                      | -0.080963109 | 0.295363544  | 0.892181547 |
| g 43-108          | g <i>Cladosporium</i>                 | -0.053067614 | 0.493191263  | 0.933370788 |
| g 43-108          | g <i>Debaryomyces</i>                 | -0.06298824  | 0.41588667   | 0.916271642 |
| g 43-108          | g <i>Aspergillus</i>                  | 0.056932874  | 0.462198849  | 0.927602832 |
| g 43-108          | g <i>Kazachstania</i>                 | -0.068520073 | 0.376053699  | 0.903077197 |
| g 43-108          | g <i>Malassezia</i>                   | 0.002431634  | 0.97496914   | 0.998625698 |
| g 43-108          | g unclassified <i>Fungi</i>           | -0.147097651 | 0.056330251  | 0.832568254 |
| g 43-108          | g <i>Fusarium</i>                     | 0.059586151  | 0.441563883  | 0.920232298 |
| g 43-108          | g <i>Mycosphaerella</i>               | -0.025567738 | 0.741424364  | 0.977585637 |
| g 43-108          | g <i>Simplicillium</i>                | -0.001171451 | 0.987939765  | 0.999049974 |
| g 43-108          | g unclassified <i>Cordycipitaceae</i> | 0.030662207  | 0.692294336  | 0.966086731 |
| g 43-108          | g unidentified                        | -0.01614776  | 0.834935016  | 0.994526835 |
| g Bacteroides C   | g <i>Verticillium</i>                 | 0.032839712  | 0.671666346  | 0.96129685  |
| g Bacteroides C   | g unclassified <i>Tremellomycetes</i> | 0.088967154  | 0.2550031962 | 0.874689648 |
| g Bacteroides C   | g <i>Candida</i>                      | -0.075882495 | 0.326806953  | 0.899370541 |
| g Bacteroides C   | g <i>Cladosporium</i>                 | -0.022486436 | 0.771670259  | 0.984434432 |
| g Bacteroides C   | g <i>Debaryomyces</i>                 | -0.057837877 | 0.455101214  | 0.924332119 |
| g Bacteroides C   | g <i>Aspergillus</i>                  | -0.096023028 | 0.214270996  | 0.874689648 |
| g Bacteroides C   | g <i>Kazachstania</i>                 | -0.048407325 | 0.531976763  | 0.940412658 |
| g Bacteroides C   | g <i>Malassezia</i>                   | -0.076846504 | 0.320680939  | 0.898741278 |
| g Bacteroides C   | g unclassified <i>Fungi</i>           | -0.110180213 | 0.153851654  | 0.85006873  |
| g Bacteroides C   | g <i>Fusarium</i>                     | -0.066296932 | 0.391773078  | 0.907694413 |
| g Bacteroides C   | g <i>Mycosphaerella</i>               | 0.02054751   | 0.790883781  | 0.986710331 |
| g Bacteroides C   | g <i>Simplicillium</i>                | -0.032822625 | 0.671827293  | 0.96129685  |
| g Bacteroides C   | g unclassified <i>Cordycipitaceae</i> | 0.049069134  | 0.526377008  | 0.940363396 |
| g Bacteroides C   | g unidentified                        | -0.089692021 | 0.246178509  | 0.874689648 |
| g UBA6382         | g <i>Verticillium</i>                 | 0.037229151  | 0.630833764  | 0.954051837 |
| g UBA6382         | g unclassified <i>Tremellomycetes</i> | -0.272681326 | 0.000334809  | 0.441278828 |
| g UBA6382         | g <i>Candida</i>                      | 0.004994812  | 0.948611089  | 0.996925697 |
| g UBA6382         | g <i>Cladosporium</i>                 | -0.116551832 | 0.13127923   | 0.849249996 |
| g UBA6382         | g <i>Debaryomyces</i>                 | 0.06412363   | 0.407515779  | 0.913116876 |



|                   |                                |              |             |             |
|-------------------|--------------------------------|--------------|-------------|-------------|
| g UBA6382         | g Aspergillus                  | 0.067981749  | 0.379824226 | 0.90490297  |
| g UBA6382         | g Kazachstania                 | -0.045053336 | 0.560807868 | 0.942564508 |
| g UBA6382         | g Malassezia                   | 0.004783576  | 0.950781588 | 0.99717368  |
| g UBA6382         | g unclassified_Fungi           | 0.069399634  | 0.369942559 | 0.901117392 |
| g UBA6382         | g Fusarium                     | -0.007691373 | 0.920941974 | 0.996251765 |
| g UBA6382         | g Mycosphaerella               | -0.113605187 | 0.141379842 | 0.849249996 |
| g UBA6382         | g Simplicillium                | 0.07863928   | 0.30948743  | 0.897967316 |
| g UBA6382         | g unclassified_Cordycipitaceae | -0.053423563 | 0.490291837 | 0.932872225 |
| g UBA6382         | g unidentified                 | 0.112952275  | 0.14369598  | 0.849249996 |
| g MGYG-HGUT-03610 | g Verticillium                 | -0.035654733 | 0.645359868 | 0.955501166 |
| g MGYG-HGUT-03610 | g unclassified_Tremellomycetes | 0.004793936  | 0.950675125 | 0.99717368  |
| g MGYG-HGUT-03610 | g Candida                      | 0.011026054  | 0.886859474 | 0.994526835 |
| g MGYG-HGUT-03610 | g Cladosporium                 | -0.059500244 | 0.442223696 | 0.92043404  |
| g MGYG-HGUT-03610 | g Debaryomyces                 | -0.071188601 | 0.357702937 | 0.900151743 |
| g MGYG-HGUT-03610 | g Aspergillus                  | -0.057003645 | 0.461641622 | 0.927602832 |
| g MGYG-HGUT-03610 | g Kazachstania                 | -0.065265797 | 0.399196197 | 0.909588897 |
| g MGYG-HGUT-03610 | g Malassezia                   | -0.136110712 | 0.077643115 | 0.8415005   |
| g MGYG-HGUT-03610 | g unclassified_Fungi           | -0.125562176 | 0.103814012 | 0.841929371 |
| g MGYG-HGUT-03610 | g Fusarium                     | -0.141690603 | 0.066122946 | 0.836350979 |
| g MGYG-HGUT-03610 | g Mycosphaerella               | 0.035190361  | 0.649670368 | 0.955501166 |
| g MGYG-HGUT-03610 | g Simplicillium                | -0.095569605 | 0.216452878 | 0.874689648 |
| g MGYG-HGUT-03610 | g unclassified_Cordycipitaceae | 0.010210768  | 0.895175505 | 0.995135868 |
| g MGYG-HGUT-03610 | g unidentified                 | -0.069414588 | 0.369839185 | 0.901117392 |
| g UBA4372         | g Verticillium                 | -0.01148614  | 0.882171918 | 0.994526835 |
| g UBA4372         | g unclassified_Tremellomycetes | -0.146243938 | 0.057791699 | 0.832568254 |
| g UBA4372         | g Candida                      | -0.103016201 | 0.182590824 | 0.872371283 |
| g UBA4372         | g Cladosporium                 | -0.009964799 | 0.897686709 | 0.995280411 |
| g UBA4372         | g Debaryomyces                 | -0.042779949 | 0.580766985 | 0.944873255 |
| g UBA4372         | g Aspergillus                  | -0.033135256 | 0.668884966 | 0.960428856 |
| g UBA4372         | g Kazachstania                 | -0.141810031 | 0.065892537 | 0.836350979 |
| g UBA4372         | g Malassezia                   | -0.052792319 | 0.495439942 | 0.934177172 |
| g UBA4372         | g unclassified_Fungi           | 0.087860293  | 0.255996334 | 0.875721978 |
| g UBA4372         | g Fusarium                     | 0.013156126  | 0.865192875 | 0.994526835 |
| g UBA4372         | g Mycosphaerella               | -0.06067963  | 0.4332143   | 0.918239588 |
| g UBA4372         | g Simplicillium                | 0.03104633   | 0.688638446 | 0.96434561  |
| g UBA4372         | g unclassified_Cordycipitaceae | -0.153828073 | 0.045844259 | 0.825673201 |
| g UBA4372         | g unidentified                 | 0.054134706  | 0.484526446 | 0.932872225 |
| g F0040           | g Verticillium                 | 0.006738066  | 0.930714647 | 0.996251765 |
| g F0040           | g unclassified_Tremellomycetes | -0.140723733 | 0.068012621 | 0.836350979 |
| g F0040           | g Candida                      | -0.115873924 | 0.133552404 | 0.849249996 |
| g F0040           | g Cladosporium                 | -0.080327157 | 0.299185544 | 0.892429947 |
| g F0040           | g Debaryomyces                 | 0.02573767   | 0.739767303 | 0.977217936 |
| g F0040           | g Aspergillus                  | -0.028550171 | 0.712520756 | 0.969574704 |
| g F0040           | g Kazachstania                 | -0.180428823 | 0.018901606 | 0.702895198 |
| g F0040           | g Malassezia                   | -0.077897903 | 0.314084946 | 0.898525398 |
| g F0040           | g unclassified_Fungi           | 0.107176217  | 0.165457486 | 0.864354699 |
| g F0040           | g Fusarium                     | -0.127460261 | 0.098651129 | 0.8415005   |
| g F0040           | g Mycosphaerella               | -0.099594835 | 0.197631354 | 0.874689648 |
| g F0040           | g Simplicillium                | -0.050991516 | 0.510282154 | 0.937123036 |
| g F0040           | g unclassified_Cordycipitaceae | -0.087563135 | 0.257614131 | 0.877677    |
| g F0040           | g unidentified                 | 0.08206671   | 0.288808253 | 0.891214772 |
| g Alloprevotella  | g Verticillium                 | 0.003500491  | 0.963972775 | 0.998529304 |
| g Alloprevotella  | g unclassified_Tremellomycetes | -0.132947796 | 0.084861072 | 0.8415005   |
| g Alloprevotella  | g Candida                      | -0.064525774 | 0.404574932 | 0.912338681 |
| g Alloprevotella  | g Cladosporium                 | -0.016836449 | 0.828001978 | 0.993650851 |
| g Alloprevotella  | g Debaryomyces                 | -0.078655943 | 0.309384607 | 0.897967316 |
| g Alloprevotella  | g Aspergillus                  | -0.024964112 | 0.747320064 | 0.979147232 |
| g Alloprevotella  | g Kazachstania                 | -0.148194205 | 0.054497961 | 0.832568254 |
| g Alloprevotella  | g Malassezia                   | -0.014173536 | 0.854878325 | 0.994526835 |
| g Alloprevotella  | g unclassified_Fungi           | 0.229366222  | 0.002702216 | 0.550026842 |
| g Alloprevotella  | g Fusarium                     | 0.065781439  | 0.395473669 | 0.909025558 |
| g Alloprevotella  | g Mycosphaerella               | -0.057719944 | 0.456022667 | 0.924332119 |
| g Alloprevotella  | g Simplicillium                | -0.058169267 | 0.452517531 | 0.923868417 |
| g Alloprevotella  | g unclassified_Cordycipitaceae | -0.031528505 | 0.68405954  | 0.963892039 |
| g Alloprevotella  | g unidentified                 | 0.21210452   | 0.005632087 | 0.613926619 |
| g Alistipes       | g Verticillium                 | 0.17285003   | 0.024619822 | 0.765986149 |
| g Alistipes       | g unclassified_Tremellomycetes | -0.08102768  | 0.294977298 | 0.892181547 |
| g Alistipes       | g Candida                      | -0.005621925 | 0.94216965  | 0.996925697 |
| g Alistipes       | g Cladosporium                 | -0.014745717 | 0.849088186 | 0.994526835 |
| g Alistipes       | g Debaryomyces                 | -0.055556673 | 0.473108292 | 0.928769554 |
| g Alistipes       | g Aspergillus                  | -0.066407303 | 0.390983468 | 0.907694413 |
| g Alistipes       | g Kazachstania                 | -0.054091361 | 0.484876805 | 0.932872225 |
| g Alistipes       | g Malassezia                   | 0.012657643  | 0.87025495  | 0.994526835 |
| g Alistipes       | g unclassified_Fungi           | -0.109492512 | 0.156452862 | 0.852150641 |
| g Alistipes       | g Fusarium                     | -0.134443607 | 0.081383204 | 0.8415005   |
| g Alistipes       | g Mycosphaerella               | -0.10429915  | 0.177173368 | 0.872371283 |
| g Alistipes       | g Simplicillium                | 0.083143353  | 0.282507424 | 0.8902203   |
| g Alistipes       | g unclassified_Cordycipitaceae | 0.10735989   | 0.164729644 | 0.864354699 |

|                   |                                |              |             |             |
|-------------------|--------------------------------|--------------|-------------|-------------|
| g Alistipes       | g unidentified                 | 0.028040103  | 0.717436378 | 0.97067915  |
| g Alistipes A     | g Verticillium                 | 0.13783521   | 0.073921517 | 0.8415005   |
| g Alistipes A     | g unclassified Tremellomycetes | -0.114769836 | 0.137319101 | 0.849249996 |
| g Alistipes A     | g Candida                      | -0.016649504 | 0.829882663 | 0.993834041 |
| g Alistipes A     | g Cladosporium                 | -0.008286839 | 0.914843558 | 0.996251765 |
| g Alistipes A     | g Debaromyces                  | -0.042431344 | 0.58385645  | 0.945028002 |
| g Alistipes A     | g Aspergillus                  | -0.032352148 | 0.676264575 | 0.96286903  |
| g Alistipes A     | g Kazachstania                 | -0.112939143 | 0.143742861 | 0.849249996 |
| g Alistipes A     | g Malassezia                   | 0.106446094  | 0.168374463 | 0.864987015 |
| g Alistipes A     | g unclassified Fungi           | -0.024632994 | 0.750560406 | 0.980278684 |
| g Alistipes A     | g Fusarium                     | -0.079348322 | 0.305131868 | 0.897967316 |
| g Alistipes A     | g Mycosphaerella               | -0.063054049 | 0.41539875  | 0.915917523 |
| g Alistipes A     | g Simplicillium                | 0.108333994  | 0.160909459 | 0.859887758 |
| g Alistipes A     | g unclassified Cordycipitaceae | 0.112353914  | 0.145843826 | 0.849249996 |
| g Alistipes A     | g unidentified                 | 0.028360949  | 0.714342955 | 0.970380158 |
| g Tidjanibacter   | g Verticillium                 | 0.128043943  | 0.097104998 | 0.8415005   |
| g Tidjanibacter   | g unclassified Tremellomycetes | -0.031517282 | 0.684165989 | 0.963892039 |
| g Tidjanibacter   | g Candida                      | -0.012350886 | 0.873372688 | 0.994526835 |
| g Tidjanibacter   | g Cladosporium                 | -0.041501908 | 0.592130301 | 0.947273049 |
| g Tidjanibacter   | g Debaromyces                  | -0.093548256 | 0.226372397 | 0.874689648 |
| g Tidjanibacter   | g Aspergillus                  | -0.047381101 | 0.540718687 | 0.94160936  |
| g Tidjanibacter   | g Kazachstania                 | -0.127874918 | 0.097550746 | 0.8415005   |
| g Tidjanibacter   | g Malassezia                   | 0.02168778   | 0.779568368 | 0.985246269 |
| g Tidjanibacter   | g unclassified Fungi           | -0.10307678  | 0.182332313 | 0.872371283 |
| g Tidjanibacter   | g Fusarium                     | -0.121845204 | 0.11453863  | 0.843328451 |
| g Tidjanibacter   | g Mycosphaerella               | -0.121360023 | 0.116000072 | 0.845352813 |
| g Tidjanibacter   | g Simplicillium                | 0.130145695  | 0.091696091 | 0.8415005   |
| g Tidjanibacter   | g unclassified Cordycipitaceae | 0.042955148  | 0.579217173 | 0.944349272 |
| g Tidjanibacter   | g unidentified                 | 0.041560201  | 0.591609812 | 0.947273049 |
| g MGYG-HGUT-04172 | g Verticillium                 | 0.143384514  | 0.062915784 | 0.832568254 |
| g MGYG-HGUT-04172 | g unclassified Tremellomycetes | -0.030480269 | 0.69402842  | 0.966086731 |
| g MGYG-HGUT-04172 | g Candida                      | -0.026078235 | 0.73644996  | 0.975939002 |
| g MGYG-HGUT-04172 | g Cladosporium                 | 0.089980447  | 0.244656742 | 0.874689648 |
| g MGYG-HGUT-04172 | g Debaromyces                  | -0.10831702  | 0.160975454 | 0.859887758 |
| g MGYG-HGUT-04172 | g Aspergillus                  | -0.039550179 | 0.609675831 | 0.951110791 |
| g MGYG-HGUT-04172 | g Kazachstania                 | -0.118257963 | 0.125689784 | 0.849249996 |
| g MGYG-HGUT-04172 | g Malassezia                   | 0.04457809   | 0.564952944 | 0.942564508 |
| g MGYG-HGUT-04172 | g unclassified Fungi           | -0.036486592 | 0.637667698 | 0.954425625 |
| g MGYG-HGUT-04172 | g Fusarium                     | -0.103417115 | 0.180884987 | 0.872371283 |
| g MGYG-HGUT-04172 | g Mycosphaerella               | -0.028268498 | 0.71523384  | 0.970380158 |
| g MGYG-HGUT-04172 | g Simplicillium                | 0.065333142  | 0.398708834 | 0.909588897 |
| g MGYG-HGUT-04172 | g unclassified Cordycipitaceae | 0.089562541  | 0.24686379  | 0.874689648 |
| g MGYG-HGUT-04172 | g unidentified                 | -0.010747925 | 0.889695086 | 0.994653074 |
| g MGYG-HGUT-03993 | g Verticillium                 | 0.025877906  | 0.73840072  | 0.976420387 |
| g MGYG-HGUT-03993 | g unclassified Tremellomycetes | 0.053881904  | 0.486571782 | 0.932872225 |
| g MGYG-HGUT-03993 | g Candida                      | -0.057562191 | 0.45725686  | 0.924332119 |
| g MGYG-HGUT-03993 | g Cladosporium                 | 0.034191694  | 0.658979763 | 0.956966684 |
| g MGYG-HGUT-03993 | g Debaromyces                  | 0.00655355   | 0.93260742  | 0.996251765 |
| g MGYG-HGUT-03993 | g Aspergillus                  | 0.012004951  | 0.876890954 | 0.994526835 |
| g MGYG-HGUT-03993 | g Kazachstania                 | -0.032072274 | 0.678909504 | 0.962963695 |
| g MGYG-HGUT-03993 | g Malassezia                   | -0.010176129 | 0.895529084 | 0.995135868 |
| g MGYG-HGUT-03993 | g unclassified Fungi           | -0.203971314 | 0.007814731 | 0.613926619 |
| g MGYG-HGUT-03993 | g Fusarium                     | 0.014563754  | 0.850928685 | 0.994526835 |
| g MGYG-HGUT-03993 | g Mycosphaerella               | -0.056997928 | 0.461686623 | 0.927602832 |
| g MGYG-HGUT-03993 | g Simplicillium                | -0.091137835 | 0.238616109 | 0.874689648 |
| g MGYG-HGUT-03993 | g unclassified Cordycipitaceae | 0.062404925  | 0.420226106 | 0.916661525 |
| g MGYG-HGUT-03993 | g unidentified                 | -0.1296291   | 0.093002792 | 0.8415005   |
| g MGYG-HGUT-00462 | g Verticillium                 | 0.111377011  | 0.149402682 | 0.849249996 |
| g MGYG-HGUT-00462 | g unclassified Tremellomycetes | -0.114313421 | 0.138899715 | 0.849249996 |
| g MGYG-HGUT-00462 | g Candida                      | -0.143376777 | 0.062930138 | 0.832568254 |
| g MGYG-HGUT-00462 | g Cladosporium                 | -0.085259722 | 0.270392771 | 0.881811135 |
| g MGYG-HGUT-00462 | g Debaromyces                  | -0.05261814  | 0.496865476 | 0.935069491 |
| g MGYG-HGUT-00462 | g Aspergillus                  | -0.043988365 | 0.57011671  | 0.942564508 |
| g MGYG-HGUT-00462 | g Kazachstania                 | -0.152281757 | 0.048096683 | 0.832568254 |
| g MGYG-HGUT-00462 | g Malassezia                   | -0.009064103 | 0.906890792 | 0.99618698  |
| g MGYG-HGUT-00462 | g unclassified Fungi           | 0.019699123  | 0.799331278 | 0.987463135 |
| g MGYG-HGUT-00462 | g Fusarium                     | -0.07175957  | 0.353850324 | 0.900151743 |
| g MGYG-HGUT-00462 | g Mycosphaerella               | -0.030063669 | 0.698005079 | 0.967320417 |
| g MGYG-HGUT-00462 | g Simplicillium                | 0.053628109  | 0.488629804 | 0.932872225 |
| g MGYG-HGUT-00462 | g unclassified Cordycipitaceae | -0.032131735 | 0.678347239 | 0.962963695 |
| g MGYG-HGUT-00462 | g unidentified                 | -0.012141666 | 0.875500221 | 0.994526835 |
| g Parabacteroides | g Verticillium                 | 0.087863938  | 0.255976537 | 0.875721978 |
| g Parabacteroides | g unclassified Tremellomycetes | 0.004859002  | 0.950006528 | 0.99717368  |
| g Parabacteroides | g Candida                      | 0.032446789  | 0.675371074 | 0.962163918 |
| g Parabacteroides | g Cladosporium                 | -0.003070711 | 0.968393639 | 0.998625698 |
| g Parabacteroides | g Debaromyces                  | -0.067838594 | 0.380830778 | 0.90490297  |
| g Parabacteroides | g Aspergillus                  | 0.008560879  | 0.912038644 | 0.996251765 |
| g Parabacteroides | g Kazachstania                 | -0.108020624 | 0.162131108 | 0.859887758 |

|                   |                                |              |             |             |
|-------------------|--------------------------------|--------------|-------------|-------------|
| g Parabacteroides | g Malassezia                   | 0.028866212  | 0.709480918 | 0.968724426 |
| g Parabacteroides | g unclassified Fungi           | -0.136426265 | 0.076951047 | 0.8415005   |
| g Parabacteroides | g Fusarium                     | -0.100272586 | 0.194582739 | 0.874689648 |
| g Parabacteroides | g Mycosphaerella               | -0.046002547 | 0.552572841 | 0.942564508 |
| g Parabacteroides | g Simplicillium                | 0.016722567  | 0.829147531 | 0.993650851 |
| g Parabacteroides | g unclassified Cordycipitaceae | 0.198711008  | 0.009598949 | 0.613926619 |
| g Parabacteroides | g unidentified                 | -0.026038432 | 0.73683742  | 0.976057954 |
| g UBA7173         | g Verticillium                 | 0.042126148  | 0.586567424 | 0.947150582 |
| g UBA7173         | g unclassified Tremellomycetes | 0.051059696  | 0.509716047 | 0.937011504 |
| g UBA7173         | g Candida                      | -0.0911102   | 0.238759115 | 0.874689648 |
| g UBA7173         | g Cladosporium                 | -0.002392302 | 0.975373895 | 0.998625698 |
| g UBA7173         | g Debaromyces                  | -0.065335356 | 0.398692817 | 0.909588897 |
| g UBA7173         | g Aspergillus                  | -0.111793802 | 0.147876362 | 0.849249996 |
| g UBA7173         | g Kazachstania                 | -0.087832358 | 0.256148124 | 0.87575706  |
| g UBA7173         | g Malassezia                   | -0.045387606 | 0.557901153 | 0.942564508 |
| g UBA7173         | g unclassified Fungi           | -0.093339895 | 0.227412884 | 0.874689648 |
| g UBA7173         | g Fusarium                     | -0.007123367 | 0.926763462 | 0.996251765 |
| g UBA7173         | g Mycosphaerella               | -0.019075703 | 0.805553681 | 0.988960513 |
| g UBA7173         | g Simplicillium                | 0.002769488  | 0.9714927   | 0.998625698 |
| g UBA7173         | g unclassified Cordycipitaceae | 0.049701464  | 0.521054697 | 0.939650241 |
| g UBA7173         | g unidentified                 | -0.05543135  | 0.474108683 | 0.929115207 |
| g CAG-1031        | g Verticillium                 | 0.117877467  | 0.126920123 | 0.849249996 |
| g CAG-1031        | g unclassified Tremellomycetes | -0.043446178 | 0.57488381  | 0.943352947 |
| g CAG-1031        | g Candida                      | -0.219397022 | 0.004156989 | 0.600391491 |
| g CAG-1031        | g Cladosporium                 | 0.005336434  | 0.94510165  | 0.996925697 |
| g CAG-1031        | g Debaromyces                  | -0.140437219 | 0.068580969 | 0.836518447 |
| g CAG-1031        | g Aspergillus                  | 0.042720024  | 0.581297527 | 0.944873255 |
| g CAG-1031        | g Kazachstania                 | -0.102485596 | 0.184866616 | 0.873641816 |
| g CAG-1031        | g Malassezia                   | 0.025241213  | 0.74461174  | 0.978592408 |
| g CAG-1031        | g unclassified Fungi           | 0.008772331  | 0.90987509  | 0.996251765 |
| g CAG-1031        | g Fusarium                     | 0.01453265   | 0.851243375 | 0.994526835 |
| g CAG-1031        | g Mycosphaerella               | -0.062611357 | 0.418687394 | 0.916661525 |
| g CAG-1031        | g Simplicillium                | 0.128330998  | 0.096351688 | 0.8415005   |
| g CAG-1031        | g unclassified Cordycipitaceae | 0.063798584  | 0.409902016 | 0.913116876 |
| g CAG-1031        | g unidentified                 | -0.015393953 | 0.842538179 | 0.994526835 |
| g CAG-485         | g Verticillium                 | 0.090079168  | 0.244137389 | 0.874689648 |
| g CAG-485         | g unclassified Tremellomycetes | 0.069334465  | 0.370393236 | 0.901117392 |
| g CAG-485         | g Candida                      | -0.126585114 | 0.101005752 | 0.8415005   |
| g CAG-485         | g Cladosporium                 | -0.006508766 | 0.933066872 | 0.996251765 |
| g CAG-485         | g Debaromyces                  | -0.085435736 | 0.269401369 | 0.880885289 |
| g CAG-485         | g Aspergillus                  | -0.125718437 | 0.103381094 | 0.841929371 |
| g CAG-485         | g Kazachstania                 | -0.097160879 | 0.208864962 | 0.874689648 |
| g CAG-485         | g Malassezia                   | -0.063515745 | 0.411985083 | 0.913695764 |
| g CAG-485         | g unclassified Fungi           | -0.189035976 | 0.013837145 | 0.702895198 |
| g CAG-485         | g Fusarium                     | 0.084695502  | 0.273587458 | 0.886311878 |
| g CAG-485         | g Mycosphaerella               | 0.007188064  | 0.926100185 | 0.996251765 |
| g CAG-485         | g Simplicillium                | 0.049452059  | 0.523150653 | 0.939740222 |
| g CAG-485         | g unclassified Cordycipitaceae | 0.062311238  | 0.420925517 | 0.916661525 |
| g CAG-485         | g unidentified                 | 0.028412396  | 0.713847358 | 0.970380158 |
| g CAG-873         | g Verticillium                 | 0.053517342  | 0.489529461 | 0.932872225 |
| g CAG-873         | g unclassified Tremellomycetes | -0.010940408 | 0.887732512 | 0.994526835 |
| g CAG-873         | g Candida                      | -0.121738486 | 0.114858843 | 0.843328451 |
| g CAG-873         | g Cladosporium                 | -0.014193015 | 0.854681079 | 0.994526835 |
| g CAG-873         | g Debaromyces                  | -0.153177888 | 0.046780379 | 0.828771778 |
| g CAG-873         | g Aspergillus                  | -0.052842477 | 0.495029835 | 0.934115958 |
| g CAG-873         | g Kazachstania                 | -0.02296839  | 0.766915367 | 0.982494893 |
| g CAG-873         | g Malassezia                   | 0.01737294   | 0.822610282 | 0.992484281 |
| g CAG-873         | g unclassified Fungi           | -0.070760732 | 0.360607072 | 0.900151743 |
| g CAG-873         | g Fusarium                     | 0.042073342  | 0.587037071 | 0.947150582 |
| g CAG-873         | g Mycosphaerella               | 0.04736702   | 0.540839124 | 0.94160936  |
| g CAG-873         | g Simplicillium                | 0.082640288  | 0.28543992  | 0.891214772 |
| g CAG-873         | g unclassified Cordycipitaceae | 0.003726201  | 0.961651473 | 0.998221928 |
| g CAG-873         | g unidentified                 | 0.057995737  | 0.453869438 | 0.924307006 |
| g CAG-279         | g Verticillium                 | 0.069619499  | 0.368424551 | 0.901117392 |
| g CAG-279         | g unclassified Tremellomycetes | -0.151963515 | 0.0485715   | 0.832568254 |
| g CAG-279         | g Candida                      | -0.052228289 | 0.500063962 | 0.936281889 |
| g CAG-279         | g Cladosporium                 | -0.128127044 | 0.09688644  | 0.8415005   |
| g CAG-279         | g Debaromyces                  | 0.053494476  | 0.489715294 | 0.932872225 |
| g CAG-279         | g Aspergillus                  | 0.06251518   | 0.419403873 | 0.916661525 |
| g CAG-279         | g Kazachstania                 | -0.063550018 | 0.411732341 | 0.913695764 |
| g CAG-279         | g Malassezia                   | 0.099486777  | 0.198120596 | 0.874689648 |
| g CAG-279         | g unclassified Fungi           | 0.144536712  | 0.060807968 | 0.832568254 |
| g CAG-279         | g Fusarium                     | -0.023064813 | 0.765965099 | 0.982494893 |
| g CAG-279         | g Mycosphaerella               | 0.038113867  | 0.622732235 | 0.952309753 |
| g CAG-279         | g Simplicillium                | 0.086257894  | 0.264803293 | 0.878368327 |
| g CAG-279         | g unclassified Cordycipitaceae | 0.022033384  | 0.776147785 | 0.984510076 |
| g CAG-279         | g unidentified                 | 0.110693512  | 0.151931448 | 0.84984956  |
| g Muribaculum     | g Verticillium                 | 0.198618173  | 0.009633432 | 0.613926619 |

|                   |                                |              |             |             |
|-------------------|--------------------------------|--------------|-------------|-------------|
| g Muribaculum     | g unclassified Tremellomycetes | 0.08404128   | 0.277323632 | 0.889015924 |
| g Muribaculum     | g Candida                      | -0.146293301 | 0.057706353 | 0.832568254 |
| g Muribaculum     | g Cladosporium                 | 0.044001375  | 0.570002553 | 0.942564508 |
| g Muribaculum     | g Debaryomyces                 | -0.094998579 | 0.21922315  | 0.874689648 |
| g Muribaculum     | g Aspergillus                  | -0.040371912 | 0.602260743 | 0.950146651 |
| g Muribaculum     | g Kazachstania                 | -0.102889281 | 0.183133309 | 0.873537668 |
| g Muribaculum     | g Malassezia                   | 0.019136829  | 0.804943032 | 0.988868764 |
| g Muribaculum     | g unclassified Fungi           | -0.044433552 | 0.566216488 | 0.942564508 |
| g Muribaculum     | g Fusarium                     | 0.061692574  | 0.425561065 | 0.918239588 |
| g Muribaculum     | g Mycosphaerella               | -0.053506005 | 0.489621594 | 0.932872225 |
| g Muribaculum     | g Simplicillium                | 0.042634296  | 0.582056896 | 0.944873255 |
| g Muribaculum     | g unclassified Cordycipitaceae | 0.10654843   | 0.167963323 | 0.864987015 |
| g Muribaculum     | g unidentified                 | -0.076403099 | 0.32348936  | 0.899370541 |
| g Duncaniella     | g Verticillium                 | 0.159311102  | 0.038554921 | 0.808354944 |
| g Duncaniella     | g unclassified Tremellomycetes | -0.053443442 | 0.490130176 | 0.932872225 |
| g Duncaniella     | g Candida                      | -0.090567259 | 0.241580896 | 0.874689648 |
| g Duncaniella     | g Cladosporium                 | 0.008541474  | 0.912237226 | 0.996251765 |
| g Duncaniella     | g Debaryomyces                 | -0.09002077  | 0.244444518 | 0.874689648 |
| g Duncaniella     | g Aspergillus                  | -0.072562888 | 0.348474112 | 0.900151743 |
| g Duncaniella     | g Kazachstania                 | -0.054529817 | 0.481339002 | 0.932872225 |
| g Duncaniella     | g Malassezia                   | 0.003904265  | 0.959820416 | 0.997919102 |
| g Duncaniella     | g unclassified Fungi           | -0.096473683 | 0.212118055 | 0.874689648 |
| g Duncaniella     | g Fusarium                     | -0.069759031 | 0.367463183 | 0.901117392 |
| g Duncaniella     | g Mycosphaerella               | -0.138055888 | 0.073455885 | 0.8415005   |
| g Duncaniella     | g Simplicillium                | 0.040148664  | 0.604271279 | 0.950399198 |
| g Duncaniella     | g unclassified Cordycipitaceae | 0.055918203  | 0.47022884  | 0.928769554 |
| g Duncaniella     | g unidentified                 | 0.030914373  | 0.689893542 | 0.96434561  |
| g Paramuribaculum | g Verticillium                 | -0.044968353 | 0.561548012 | 0.942564508 |
| g Paramuribaculum | g unclassified Tremellomycetes | -0.071101457 | 0.358293239 | 0.900151743 |
| g Paramuribaculum | g Candida                      | -0.125216954 | 0.104775499 | 0.841929371 |
| g Paramuribaculum | g Cladosporium                 | -0.040748817 | 0.598873176 | 0.948266952 |
| g Paramuribaculum | g Debaryomyces                 | -0.068717537 | 0.374676381 | 0.902314617 |
| g Paramuribaculum | g Aspergillus                  | -0.00637039  | 0.93448666  | 0.996251765 |
| g Paramuribaculum | g Kazachstania                 | -0.053866287 | 0.486698292 | 0.932872225 |
| g Paramuribaculum | g Malassezia                   | -0.08588864  | 0.266861741 | 0.878368327 |
| g Paramuribaculum | g unclassified Fungi           | 0.074286008  | 0.337116714 | 0.900151743 |
| g Paramuribaculum | g Fusarium                     | 0.137497143  | 0.074639474 | 0.8415005   |
| g Paramuribaculum | g Mycosphaerella               | 0.037539902  | 0.627983072 | 0.953023967 |
| g Paramuribaculum | g Simplicillium                | -0.082168825 | 0.288206651 | 0.891214772 |
| g Paramuribaculum | g unclassified Cordycipitaceae | -0.089207702 | 0.248748588 | 0.874689648 |
| g Paramuribaculum | g unidentified                 | 0.038178441  | 0.622142665 | 0.952309753 |
| g K10             | g Verticillium                 | -0.054175439 | 0.484197324 | 0.932872225 |
| g K10             | g unclassified Tremellomycetes | -0.093382044 | 0.227202134 | 0.874689648 |
| g K10             | g Candida                      | -0.160848959 | 0.0366951   | 0.808354944 |
| g K10             | g Cladosporium                 | -0.072445766 | 0.349254734 | 0.900151743 |
| g K10             | g Debaryomyces                 | -0.037352439 | 0.629702121 | 0.953805905 |
| g K10             | g Aspergillus                  | 0.0613394    | 0.428220519 | 0.918239588 |
| g K10             | g Kazachstania                 | -0.093943322 | 0.224408817 | 0.874689648 |
| g K10             | g Malassezia                   | -0.138326349 | 0.072888456 | 0.8415005   |
| g K10             | g unclassified Fungi           | 0.069087787  | 0.372102219 | 0.901117392 |
| g K10             | g Fusarium                     | 0.0934891    | 0.226667461 | 0.874689648 |
| g K10             | g Mycosphaerella               | -0.096383451 | 0.212547881 | 0.874689648 |
| g K10             | g Simplicillium                | -0.030147963 | 0.697199784 | 0.967127531 |
| g K10             | g unclassified Cordycipitaceae | -0.076003471 | 0.326034077 | 0.899370541 |
| g K10             | g unidentified                 | 0.090442702  | 0.242231511 | 0.874689648 |
| g UBA7173 A       | g Verticillium                 | 0.070325803  | 0.363574103 | 0.901117392 |
| g UBA7173 A       | g unclassified Tremellomycetes | -0.006145931 | 0.936790127 | 0.996251765 |
| g UBA7173 A       | g Candida                      | -0.04865377  | 0.529888034 | 0.940412658 |
| g UBA7173 A       | g Cladosporium                 | 0.033492817  | 0.665525951 | 0.959776195 |
| g UBA7173 A       | g Debaryomyces                 | -0.128239617 | 0.096590991 | 0.8415005   |
| g UBA7173 A       | g Aspergillus                  | -0.037769809 | 0.625877539 | 0.952753622 |
| g UBA7173 A       | g Kazachstania                 | -0.048741975 | 0.529141459 | 0.940412658 |
| g UBA7173 A       | g Malassezia                   | 0.122057417  | 0.11390394  | 0.843328451 |
| g UBA7173 A       | g unclassified Fungi           | 0.016145299  | 0.834959812 | 0.994526835 |
| g UBA7173 A       | g Fusarium                     | -0.028169138 | 0.716191735 | 0.97067915  |
| g UBA7173 A       | g Mycosphaerella               | 0.077564064  | 0.316169648 | 0.898525398 |
| g UBA7173 A       | g Simplicillium                | 0.04829592   | 0.532922324 | 0.940891392 |
| g UBA7173 A       | g unclassified Cordycipitaceae | 0.115755629  | 0.133952151 | 0.849249996 |
| g UBA7173 A       | g unidentified                 | 0.064670619  | 0.403518783 | 0.912338681 |
| g UBA3263         | g Verticillium                 | -0.054482975 | 0.48171629  | 0.932872225 |
| g UBA3263         | g unclassified Tremellomycetes | 0.044822899  | 0.562815914 | 0.942564508 |
| g UBA3263         | g Candida                      | -0.10101365  | 0.191288629 | 0.874689648 |
| g UBA3263         | g Cladosporium                 | 0.056150055  | 0.468387287 | 0.928769554 |
| g UBA3263         | g Debaryomyces                 | -0.086524491 | 0.263323875 | 0.878368327 |
| g UBA3263         | g Aspergillus                  | -0.039807611 | 0.607348509 | 0.950933357 |
| g UBA3263         | g Kazachstania                 | 0.025733331  | 0.739809603 | 0.977217936 |
| g UBA3263         | g Malassezia                   | -0.012427105 | 0.872597849 | 0.994526835 |
| g UBA3263         | g unclassified Fungi           | -0.075040631 | 0.332217968 | 0.900151743 |



|                   |                                |              |             |             |
|-------------------|--------------------------------|--------------|-------------|-------------|
| g UBA3263         | g Fusarium                     | 0.089918439  | 0.244983353 | 0.874689648 |
| g UBA3263         | g Mycosphaerella               | 0.080913323  | 0.295661579 | 0.892181547 |
| g UBA3263         | g Simplicillium                | -0.019392006 | 0.802395085 | 0.988396129 |
| g UBA3263         | g unclassified Cordycipitaceae | -0.000423167 | 0.995643293 | 0.999049974 |
| g UBA3263         | g unidentified                 | -0.048315115 | 0.532759346 | 0.940891392 |
| g MGYG-HGUT-03270 | g Verticillium                 | 0.032244783  | 0.677278758 | 0.962963695 |
| g MGYG-HGUT-03270 | g unclassified Tremellomycetes | -0.282582721 | 0.000197283 | 0.392677477 |
| g MGYG-HGUT-03270 | g Candida                      | -0.09229844  | 0.232664213 | 0.874689648 |
| g MGYG-HGUT-03270 | g Cladosporium                 | -0.162176877 | 0.035150655 | 0.808354944 |
| g MGYG-HGUT-03270 | g Debaromyces                  | -0.045309523 | 0.558579486 | 0.942564508 |
| g MGYG-HGUT-03270 | g Aspergillus                  | 0.041971582  | 0.58794259  | 0.947150582 |
| g MGYG-HGUT-03270 | g Kazachstania                 | -0.113104763 | 0.143152482 | 0.849249996 |
| g MGYG-HGUT-03270 | g Malassezia                   | -0.081375576 | 0.292902065 | 0.892181547 |
| g MGYG-HGUT-03270 | g unclassified Fungi           | 0.16220847   | 0.035114591 | 0.808354944 |
| g MGYG-HGUT-03270 | g Fusarium                     | -0.059159612 | 0.444845442 | 0.921010267 |
| g MGYG-HGUT-03270 | g Mycosphaerella               | -0.029910588 | 0.699468389 | 0.967505184 |
| g MGYG-HGUT-03270 | g Simplicillium                | 0.048865509  | 0.528096754 | 0.940363396 |
| g MGYG-HGUT-03270 | g unclassified Cordycipitaceae | -0.030807799 | 0.690907827 | 0.965220414 |
| g MGYG-HGUT-03270 | g unidentified                 | 0.205593886  | 0.007327255 | 0.613926619 |
| g MGYG-HGUT-02176 | g Verticillium                 | 0.048422655  | 0.531846717 | 0.940412658 |
| g MGYG-HGUT-02176 | g unclassified Tremellomycetes | -0.128140259 | 0.096851719 | 0.8415005   |
| g MGYG-HGUT-02176 | g Candida                      | -0.106675924 | 0.167452154 | 0.864987015 |
| g MGYG-HGUT-02176 | g Cladosporium                 | -0.058586911 | 0.449273093 | 0.922032734 |
| g MGYG-HGUT-02176 | g Debaromyces                  | -0.085521215 | 0.268920794 | 0.880885289 |
| g MGYG-HGUT-02176 | g Aspergillus                  | 0.088639415  | 0.251787887 | 0.874689648 |
| g MGYG-HGUT-02176 | g Kazachstania                 | -0.127252372 | 0.099206493 | 0.8415005   |
| g MGYG-HGUT-02176 | g Malassezia                   | -0.008859704 | 0.908981284 | 0.996251765 |
| g MGYG-HGUT-02176 | g unclassified Fungi           | 0.173435159  | 0.024130751 | 0.765986149 |
| g MGYG-HGUT-02176 | g Fusarium                     | 0.074007636  | 0.338935362 | 0.900151743 |
| g MGYG-HGUT-02176 | g Mycosphaerella               | 0.005371243  | 0.944744115 | 0.996925697 |
| g MGYG-HGUT-02176 | g Simplicillium                | 0.082166057  | 0.288222946 | 0.891214772 |
| g MGYG-HGUT-02176 | g unclassified Cordycipitaceae | 0.009499572  | 0.90243917  | 0.995280411 |
| g MGYG-HGUT-02176 | g unidentified                 | 0.211052284  | 0.005879751 | 0.613926619 |
| g C941            | g Verticillium                 | -0.041243107 | 0.594443612 | 0.947273049 |
| g C941            | g unclassified Tremellomycetes | -0.224070847 | 0.003404551 | 0.580842757 |
| g C941            | g Candida                      | -0.045780296 | 0.554495731 | 0.942564508 |
| g C941            | g Cladosporium                 | -0.089027433 | 0.249709931 | 0.874689648 |
| g C941            | g Debaromyces                  | 0.10259644   | 0.184389491 | 0.873641816 |
| g C941            | g Aspergillus                  | -0.040477927 | 0.601307029 | 0.949616339 |
| g C941            | g Kazachstania                 | -0.036742935 | 0.635305027 | 0.954116909 |
| g C941            | g Malassezia                   | -0.117520942 | 0.128081362 | 0.849249996 |
| g C941            | g unclassified Fungi           | 0.11093162   | 0.151046871 | 0.84984956  |
| g C941            | g Fusarium                     | -0.099627063 | 0.197485606 | 0.874689648 |
| g C941            | g Mycosphaerella               | -0.136301923 | 0.077223156 | 0.8415005   |
| g C941            | g Simplicillium                | -0.099052368 | 0.200096281 | 0.874689648 |
| g C941            | g unclassified Cordycipitaceae | -0.109682648 | 0.155730395 | 0.851524192 |
| g C941            | g unidentified                 | -0.007044446 | 0.92757264  | 0.996251765 |
| g MGYG-HGUT-01871 | g Verticillium                 | 0.152389829  | 0.047936321 | 0.832568254 |
| g MGYG-HGUT-01871 | g unclassified Tremellomycetes | -0.016124468 | 0.835169717 | 0.994526835 |
| g MGYG-HGUT-01871 | g Candida                      | -0.007839608 | 0.919423398 | 0.996251765 |
| g MGYG-HGUT-01871 | g Cladosporium                 | -0.05015032  | 0.51729342  | 0.938796978 |
| g MGYG-HGUT-01871 | g Debaromyces                  | -0.017351053 | 0.822830077 | 0.992484281 |
| g MGYG-HGUT-01871 | g Aspergillus                  | -0.04288389  | 0.579847295 | 0.944667116 |
| g MGYG-HGUT-01871 | g Kazachstania                 | -0.016296058 | 0.833441001 | 0.994526835 |
| g MGYG-HGUT-01871 | g Malassezia                   | -0.094753779 | 0.220418465 | 0.874689648 |
| g MGYG-HGUT-01871 | g unclassified Fungi           | -0.093060296 | 0.228814412 | 0.874689648 |
| g MGYG-HGUT-01871 | g Fusarium                     | -0.123525792 | 0.109587214 | 0.843328451 |
| g MGYG-HGUT-01871 | g Mycosphaerella               | 0.007086138  | 0.927145166 | 0.996251765 |
| g MGYG-HGUT-01871 | g Simplicillium                | 0.007622541  | 0.921647214 | 0.996251765 |
| g MGYG-HGUT-01871 | g unclassified Cordycipitaceae | 0.042972361  | 0.579065014 | 0.944349272 |
| g MGYG-HGUT-01871 | g unidentified                 | -0.029786039 | 0.700659776 | 0.967505184 |
| g MGYG-HGUT-02567 | g Verticillium                 | 0.107784654  | 0.163055591 | 0.859887758 |
| g MGYG-HGUT-02567 | g unclassified Tremellomycetes | -0.046776136 | 0.545905219 | 0.942564508 |
| g MGYG-HGUT-02567 | g Candida                      | -0.133562994 | 0.083416538 | 0.8415005   |
| g MGYG-HGUT-02567 | g Cladosporium                 | 0.162040321  | 0.035306899 | 0.808354944 |
| g MGYG-HGUT-02567 | g Debaromyces                  | -0.059487483 | 0.442321755 | 0.92043404  |
| g MGYG-HGUT-02567 | g Aspergillus                  | -0.113304655 | 0.14244239  | 0.849249996 |
| g MGYG-HGUT-02567 | g Kazachstania                 | 0.016667379  | 0.829702797 | 0.993834041 |
| g MGYG-HGUT-02567 | g Malassezia                   | 0.087320517  | 0.258940196 | 0.878368327 |
| g MGYG-HGUT-02567 | g unclassified Fungi           | -0.174692775 | 0.023107776 | 0.764130246 |
| g MGYG-HGUT-02567 | g Fusarium                     | -0.033416797 | 0.66623955  | 0.959776195 |
| g MGYG-HGUT-02567 | g Mycosphaerella               | 0.021665155  | 0.779792444 | 0.985394479 |
| g MGYG-HGUT-02567 | g Simplicillium                | 0.125251188  | 0.104679842 | 0.841929371 |
| g MGYG-HGUT-02567 | g unclassified Cordycipitaceae | 0.07241262   | 0.349475854 | 0.900151743 |
| g MGYG-HGUT-02567 | g unidentified                 | 0.036435283  | 0.638141047 | 0.954676713 |
| g MGYG-HGUT-03424 | g Verticillium                 | -0.043266908 | 0.576464119 | 0.943618965 |
| g MGYG-HGUT-03424 | g unclassified Tremellomycetes | -0.249835411 | 0.001053398 | 0.534709451 |
| g MGYG-HGUT-03424 | g Candida                      | 0.03655867   | 0.637002994 | 0.954338328 |

|                   |                                |              |             |             |
|-------------------|--------------------------------|--------------|-------------|-------------|
| g MGYG-HGUT-03424 | g Cladosporium                 | -0.039927733 | 0.606263894 | 0.950933357 |
| g MGYG-HGUT-03424 | g Debaryomyces                 | -0.041182429 | 0.594986575 | 0.947273049 |
| g MGYG-HGUT-03424 | g Aspergillus                  | 0.052580653  | 0.497172558 | 0.935069491 |
| g MGYG-HGUT-03424 | g Kazachstania                 | -0.018615133 | 0.810158539 | 0.990265326 |
| g MGYG-HGUT-03424 | g Malassezia                   | -0.039308868 | 0.611860961 | 0.951172976 |
| g MGYG-HGUT-03424 | g unclassified Fungi           | 0.084232706  | 0.27622688  | 0.888419029 |
| g MGYG-HGUT-03424 | g Fusarium                     | -0.026238604 | 0.734889535 | 0.974711163 |
| g MGYG-HGUT-03424 | g Mycosphaerella               | -0.066370085 | 0.391249625 | 0.907694413 |
| g MGYG-HGUT-03424 | g Simplicillium                | -0.051619619 | 0.505079293 | 0.936546622 |
| g MGYG-HGUT-03424 | g unclassified Cordycipitaceae | -0.129818324 | 0.09252245  | 0.8415005   |
| g MGYG-HGUT-03424 | g unidentified                 | 0.119948277  | 0.120335154 | 0.849176369 |
| g Odoribacter     | g Verticillium                 | 0.208089851  | 0.006630073 | 0.613926619 |
| g Odoribacter     | g unclassified Tremellomycetes | -0.068815997 | 0.373990773 | 0.902163371 |
| g Odoribacter     | g Candida                      | 0.021705397  | 0.7793939   | 0.985246269 |
| g Odoribacter     | g Cladosporium                 | 0.013866945  | 0.85798405  | 0.994526835 |
| g Odoribacter     | g Debaryomyces                 | -0.098193632 | 0.204043671 | 0.874689648 |
| g Odoribacter     | g Aspergillus                  | -0.099716779 | 0.197080293 | 0.874689648 |
| g Odoribacter     | g Kazachstania                 | -0.182021658 | 0.017858399 | 0.702895198 |
| g Odoribacter     | g Malassezia                   | 0.047664363  | 0.538298618 | 0.941323418 |
| g Odoribacter     | g unclassified Fungi           | -0.05740805  | 0.458464592 | 0.925683065 |
| g Odoribacter     | g Fusarium                     | -0.077887933 | 0.314147074 | 0.898525398 |
| g Odoribacter     | g Mycosphaerella               | -0.103742162 | 0.179510585 | 0.872371283 |
| g Odoribacter     | g Simplicillium                | 0.091185999  | 0.238367011 | 0.874689648 |
| g Odoribacter     | g unclassified Cordycipitaceae | 0.119688821  | 0.121145373 | 0.849176369 |
| g Odoribacter     | g unidentified                 | -0.034410775 | 0.656932974 | 0.956614192 |
| g Butyricimonas   | g Verticillium                 | 0.132936828  | 0.084887006 | 0.8415005   |
| g Butyricimonas   | g unclassified Tremellomycetes | -0.116707028 | 0.130763029 | 0.849249996 |
| g Butyricimonas   | g Candida                      | -0.031899322 | 0.680545935 | 0.963552346 |
| g Butyricimonas   | g Cladosporium                 | -0.016246058 | 0.833944656 | 0.994526835 |
| g Butyricimonas   | g Debaryomyces                 | -0.10795051  | 0.162405393 | 0.859887758 |
| g Butyricimonas   | g Aspergillus                  | -0.046610405 | 0.547330332 | 0.942564508 |
| g Butyricimonas   | g Kazachstania                 | -0.18180256  | 0.017998862 | 0.702895198 |
| g Butyricimonas   | g Malassezia                   | 0.098772693  | 0.20137576  | 0.874689648 |
| g Butyricimonas   | g unclassified Fungi           | -0.08365348  | 0.279554497 | 0.889387397 |
| g Butyricimonas   | g Fusarium                     | -0.024872183 | 0.748219251 | 0.979147232 |
| g Butyricimonas   | g Mycosphaerella               | -0.036285167 | 0.639526758 | 0.955341199 |
| g Butyricimonas   | g Simplicillium                | 0.083224028  | 0.282039034 | 0.8902203   |
| g Butyricimonas   | g unclassified Cordycipitaceae | 0.121763181  | 0.114784684 | 0.843328451 |
| g Butyricimonas   | g unidentified                 | 0.106831532  | 0.166829837 | 0.864987015 |
| g Gabonibacter    | g Verticillium                 | 0.254453219  | 0.000842427 | 0.534709451 |
| g Gabonibacter    | g unclassified Tremellomycetes | -0.035215362 | 0.649438002 | 0.955501166 |
| g Gabonibacter    | g Candida                      | -0.096505693 | 0.211965724 | 0.874689648 |
| g Gabonibacter    | g Cladosporium                 | -0.014652988 | 0.850026013 | 0.994526835 |
| g Gabonibacter    | g Debaryomyces                 | -0.111179623 | 0.150129675 | 0.849249996 |
| g Gabonibacter    | g Aspergillus                  | -0.057364848 | 0.458803415 | 0.925835587 |
| g Gabonibacter    | g Kazachstania                 | -0.135576968 | 0.078825144 | 0.8415005   |
| g Gabonibacter    | g Malassezia                   | 0.042645919  | 0.581953911 | 0.944873255 |
| g Gabonibacter    | g unclassified Fungi           | -0.171069719 | 0.026160539 | 0.765986149 |
| g Gabonibacter    | g Fusarium                     | -0.051103367 | 0.509353613 | 0.937011504 |
| g Gabonibacter    | g Mycosphaerella               | -0.067997883 | 0.37971089  | 0.90490297  |
| g Gabonibacter    | g Simplicillium                | 0.08484054   | 0.272763802 | 0.88516315  |
| g Gabonibacter    | g unclassified Cordycipitaceae | 0.197087883  | 0.010217825 | 0.613926619 |
| g Gabonibacter    | g unidentified                 | -0.049669809 | 0.521320478 | 0.939740222 |
| g Barnesiella     | g Verticillium                 | 0.126669081  | 0.100777928 | 0.8415005   |
| g Barnesiella     | g unclassified Tremellomycetes | -0.080629179 | 0.297366364 | 0.892181547 |
| g Barnesiella     | g Candida                      | -0.020126947 | 0.795068402 | 0.987152004 |
| g Barnesiella     | g Cladosporium                 | -0.099892485 | 0.196288242 | 0.874689648 |
| g Barnesiella     | g Debaryomyces                 | -0.11845877  | 0.125044194 | 0.849176369 |
| g Barnesiella     | g Aspergillus                  | -0.012950561 | 0.86727973  | 0.994526835 |
| g Barnesiella     | g Kazachstania                 | -0.075380091 | 0.330029251 | 0.900151743 |
| g Barnesiella     | g Malassezia                   | 0.030407417  | 0.694723226 | 0.966217026 |
| g Barnesiella     | g unclassified Fungi           | -0.08244338  | 0.286593283 | 0.891214772 |
| g Barnesiella     | g Fusarium                     | -0.170473858 | 0.026694327 | 0.765986149 |
| g Barnesiella     | g Mycosphaerella               | -0.159205489 | 0.038685507 | 0.808354944 |
| g Barnesiella     | g Simplicillium                | 0.114172346  | 0.139391072 | 0.849249996 |
| g Barnesiella     | g unclassified Cordycipitaceae | 0.085755649  | 0.267605781 | 0.879423876 |
| g Barnesiella     | g unidentified                 | 0.010468211  | 0.892548271 | 0.994653074 |
| g Coprobacter     | g Verticillium                 | 0.051332206  | 0.507456623 | 0.936546622 |
| g Coprobacter     | g unclassified Tremellomycetes | 0.066666605  | 0.389132153 | 0.907127903 |
| g Coprobacter     | g Candida                      | -0.001836472 | 0.98109433  | 0.998625698 |
| g Coprobacter     | g Cladosporium                 | -0.00255525  | 0.973697108 | 0.998625698 |
| g Coprobacter     | g Debaryomyces                 | -0.086618398 | 0.262804108 | 0.878368327 |
| g Coprobacter     | g Aspergillus                  | -0.006170659 | 0.936536335 | 0.996251765 |
| g Coprobacter     | g Kazachstania                 | -0.086122629 | 0.26555608  | 0.878368327 |
| g Coprobacter     | g Malassezia                   | -0.030721747 | 0.691727193 | 0.966086731 |
| g Coprobacter     | g unclassified Fungi           | -0.183081165 | 0.017192501 | 0.702895198 |
| g Coprobacter     | g Fusarium                     | -0.057473562 | 0.457951073 | 0.925127348 |
| g Coprobacter     | g Mycosphaerella               | -0.035665561 | 0.645259496 | 0.955501166 |

|               |                                |              |             |             |
|---------------|--------------------------------|--------------|-------------|-------------|
| g Coprobacter | g Simplicillium                | -0.040761949 | 0.598755302 | 0.948266952 |
| g Coprobacter | g unclassified_Cordycipitaceae | 0.077073555  | 0.319248986 | 0.98536448  |
| g Coprobacter | g unidentified                 | -0.038006195 | 0.623715819 | 0.952309753 |
| g RC9         | g Verticillium                 | 0.034428509  | 0.6567674   | 0.956614192 |
| g RC9         | g unclassified_Tremellomycetes | -0.157848031 | 0.04039737  | 0.808354944 |
| g RC9         | g Candida                      | -0.161341426 | 0.036115778 | 0.808354944 |
| g RC9         | g Cladosporium                 | -0.030381288 | 0.694972489 | 0.966217026 |
| g RC9         | g Debaromyces                  | -0.071480788 | 0.355728148 | 0.900151743 |
| g RC9         | g Aspergillus                  | -0.086380593 | 0.264121703 | 0.878368327 |
| g RC9         | g Kazachstania                 | -0.211927425 | 0.005673106 | 0.613926619 |
| g RC9         | g Malassezia                   | 0.020511188  | 0.791244955 | 0.986710331 |
| g RC9         | g unclassified_Fungi           | 0.086756719  | 0.262039797 | 0.878368327 |
| g RC9         | g Fusarium                     | -0.002809777 | 0.971078174 | 0.998625698 |
| g RC9         | g Mycosphaerella               | -0.006964053 | 0.928396981 | 0.996251765 |
| g RC9         | g Simplicillium                | 0.074150913  | 0.337998532 | 0.900151743 |
| g RC9         | g unclassified_Cordycipitaceae | 0.005496405  | 0.943458645 | 0.99625697  |
| g RC9         | g unidentified                 | 0.183935873  | 0.016671153 | 0.702895198 |
| g CAG-831     | g Verticillium                 | 0.096485671  | 0.212060997 | 0.874689648 |
| g CAG-831     | g unclassified_Tremellomycetes | 0.099510413  | 0.198013504 | 0.874689648 |
| g CAG-831     | g Candida                      | 0.006112365  | 0.937134638 | 0.996251765 |
| g CAG-831     | g Cladosporium                 | 0.019613628  | 0.80018388  | 0.987507186 |
| g CAG-831     | g Debaromyces                  | -0.106771929 | 0.167067998 | 0.864987015 |
| g CAG-831     | g Aspergillus                  | -0.03681179  | 0.634671031 | 0.954116909 |
| g CAG-831     | g Kazachstania                 | -0.066429086 | 0.390827739 | 0.907694413 |
| g CAG-831     | g Malassezia                   | -0.066329416 | 0.391540586 | 0.907694413 |
| g CAG-831     | g unclassified_Fungi           | -0.087018193 | 0.260599142 | 0.878368327 |
| g CAG-831     | g Fusarium                     | -0.107933916 | 0.162470356 | 0.859887758 |
| g CAG-831     | g Mycosphaerella               | -0.071233509 | 0.357398974 | 0.900151743 |
| g CAG-831     | g Simplicillium                | -0.000574017 | 0.994090251 | 0.999049974 |
| g CAG-831     | g unclassified_Cordycipitaceae | 0.110280543  | 0.153474897 | 0.85006873  |
| g CAG-831     | g unidentified                 | -0.0501465   | 0.517325367 | 0.938796978 |
| g UBA1232     | g Verticillium                 | 0.080917897  | 0.295634186 | 0.892181547 |
| g UBA1232     | g unclassified_Tremellomycetes | -0.23051229  | 0.002568678 | 0.550026842 |
| g UBA1232     | g Candida                      | -0.143788539 | 0.062169954 | 0.832568254 |
| g UBA1232     | g Cladosporium                 | -0.088552356 | 0.252255752 | 0.874689648 |
| g UBA1232     | g Debaromyces                  | -0.066269575 | 0.39196894  | 0.907694413 |
| g UBA1232     | g Aspergillus                  | -0.033117465 | 0.669052271 | 0.960428856 |
| g UBA1232     | g Kazachstania                 | -0.182021674 | 0.017853889 | 0.702895198 |
| g UBA1232     | g Malassezia                   | 0.098057947  | 0.204672481 | 0.874689648 |
| g UBA1232     | g unclassified_Fungi           | 0.230366318  | 0.002585348 | 0.550026842 |
| g UBA1232     | g Fusarium                     | -0.211265711 | 0.005828745 | 0.613926619 |
| g UBA1232     | g Mycosphaerella               | -0.061414136 | 0.427656953 | 0.918239588 |
| g UBA1232     | g Simplicillium                | 0.01442067   | 0.852376507 | 0.994526835 |
| g UBA1232     | g unclassified_Cordycipitaceae | -0.002025807 | 0.979145619 | 0.998625698 |
| g UBA1232     | g unidentified                 | 0.22830632   | 0.002831277 | 0.550026842 |
| g UBA11471    | g Verticillium                 | 0.104513055  | 0.176281783 | 0.871837921 |
| g UBA11471    | g unclassified_Tremellomycetes | 0.088667485  | 0.251637166 | 0.874689648 |
| g UBA11471    | g Candida                      | -0.034772191 | 0.653561988 | 0.956331535 |
| g UBA11471    | g Cladosporium                 | -0.043381192 | 0.575456448 | 0.943352947 |
| g UBA11471    | g Debaromyces                  | -0.069597705 | 0.368574852 | 0.901117392 |
| g UBA11471    | g Aspergillus                  | -0.049265763 | 0.524719041 | 0.939740222 |
| g UBA11471    | g Kazachstania                 | -0.042478813 | 0.583435322 | 0.945028002 |
| g UBA11471    | g Malassezia                   | -0.070851075 | 0.359992657 | 0.900151743 |
| g UBA11471    | g unclassified_Fungi           | -0.150533721 | 0.050753137 | 0.832568254 |
| g UBA11471    | g Fusarium                     | -0.064320234 | 0.406076455 | 0.913116876 |
| g UBA11471    | g Mycosphaerella               | -0.027390483 | 0.723713691 | 0.972631421 |
| g UBA11471    | g Simplicillium                | -0.011874783 | 0.878215429 | 0.994526835 |
| g UBA11471    | g unclassified_Cordycipitaceae | 0.135776948  | 0.078380581 | 0.8415005   |
| g UBA11471    | g unidentified                 | -0.111271448 | 0.149791144 | 0.849249996 |
| g UBA1711     | g Verticillium                 | 0.117591829  | 0.127849828 | 0.849249996 |
| g UBA1711     | g unclassified_Tremellomycetes | -0.186415205 | 0.015235896 | 0.702895198 |
| g UBA1711     | g Candida                      | -0.066355488 | 0.391354043 | 0.907694413 |
| g UBA1711     | g Cladosporium                 | 0.006207336  | 0.936159916 | 0.996251765 |
| g UBA1711     | g Debaromyces                  | -0.124529914 | 0.106709833 | 0.843328451 |
| g UBA1711     | g Aspergillus                  | 0.044960605  | 0.561615519 | 0.942564508 |
| g UBA1711     | g Kazachstania                 | -0.015546597 | 0.84099735  | 0.994526835 |
| g UBA1711     | g Malassezia                   | 0.057631053  | 0.456717886 | 0.924332119 |
| g UBA1711     | g unclassified_Fungi           | 0.2192518    | 0.004182595 | 0.600391491 |
| g UBA1711     | g Fusarium                     | -0.011720439 | 0.879786334 | 0.994526835 |
| g UBA1711     | g Mycosphaerella               | -0.028346231 | 0.714484755 | 0.970380158 |
| g UBA1711     | g Simplicillium                | 0.06032184   | 0.435936297 | 0.919176572 |
| g UBA1711     | g unclassified_Cordycipitaceae | 0.008885582  | 0.908716589 | 0.996251765 |
| g UBA1711     | g unidentified                 | 0.144120561  | 0.061562479 | 0.832568254 |
| g UBA3388     | g Verticillium                 | 0.076679766  | 0.32173516  | 0.898854824 |
| g UBA3388     | g unclassified_Tremellomycetes | -0.245056867 | 0.001321805 | 0.534709451 |
| g UBA3388     | g Candida                      | -0.122667632 | 0.112094191 | 0.843328451 |
| g UBA3388     | g Cladosporium                 | -0.144908595 | 0.060140158 | 0.832568254 |
| g UBA3388     | g Debaromyces                  | -0.031206531 | 0.687115855 | 0.963892039 |

|                   |                                |              |             |             |
|-------------------|--------------------------------|--------------|-------------|-------------|
| g UBA3388         | g Aspergillus                  | 0.071511139  | 0.355523406 | 0.900151743 |
| g UBA3388         | g Kazachstania                 | -0.213821484 | 0.005247943 | 0.613926619 |
| g UBA3388         | g Malassezia                   | -0.046739086 | 0.546223654 | 0.942564508 |
| g UBA3388         | g unclassified_Fungi           | 0.095832052  | 0.215188055 | 0.874689648 |
| g UBA3388         | g Fusarium                     | -0.133773193 | 0.08292752  | 0.8415005   |
| g UBA3388         | g Mycosphaerella               | -0.144681853 | 0.06054661  | 0.832568254 |
| g UBA3388         | g Simplicillium                | 0.123560553  | 0.109486597 | 0.843328451 |
| g UBA3388         | g unclassified_Cordycipitaceae | -0.000515355 | 0.994694188 | 0.999049974 |
| g UBA3388         | g unidentified                 | 0.133104924  | 0.084490229 | 0.8415005   |
| g Dysgonomonas    | g Verticillium                 | -0.034667532 | 0.654537437 | 0.956614192 |
| g Dysgonomonas    | g unclassified_Tremellomycetes | 0.090637325  | 0.241215443 | 0.874689648 |
| g Dysgonomonas    | g Candida                      | -0.086227384 | 0.264972964 | 0.878368327 |
| g Dysgonomonas    | g Cladosporium                 | -0.004283497 | 0.955921427 | 0.99717368  |
| g Dysgonomonas    | g Debaromyces                  | 0.029557021  | 0.702852372 | 0.967508066 |
| g Dysgonomonas    | g Aspergillus                  | -0.010492058 | 0.892304975 | 0.994653074 |
| g Dysgonomonas    | g Kazachstania                 | -0.078640423 | 0.309480377 | 0.897967316 |
| g Dysgonomonas    | g Malassezia                   | -0.076684197 | 0.321707117 | 0.898854824 |
| g Dysgonomonas    | g unclassified_Fungi           | -0.085648008 | 0.268209027 | 0.880290459 |
| g Dysgonomonas    | g Fusarium                     | 0.010019979  | 0.897123262 | 0.995280411 |
| g Dysgonomonas    | g Mycosphaerella               | -0.052019945 | 0.501777725 | 0.936281889 |
| g Dysgonomonas    | g Simplicillium                | -0.075500679 | 0.329253975 | 0.899622647 |
| g Dysgonomonas    | g unclassified_Cordycipitaceae | -0.033005097 | 0.670109347 | 0.961102551 |
| g Dysgonomonas    | g unidentified                 | -0.038551479 | 0.618741514 | 0.952309753 |
| g MGYG-HGUT-04443 | g Verticillium                 | 0.038342344  | 0.620647301 | 0.952309753 |
| g MGYG-HGUT-04443 | g unclassified_Tremellomycetes | 0.165475921  | 0.031549954 | 0.796627796 |
| g MGYG-HGUT-04443 | g Candida                      | 0.028042825  | 0.717410119 | 0.97067915  |
| g MGYG-HGUT-04443 | g Cladosporium                 | 0.022580216  | 0.770744372 | 0.984136305 |
| g MGYG-HGUT-04443 | g Debaromyces                  | -0.097588655 | 0.206858104 | 0.874689648 |
| g MGYG-HGUT-04443 | g Aspergillus                  | 0.049904423  | 0.519352237 | 0.939250598 |
| g MGYG-HGUT-04443 | g Kazachstania                 | -0.073940114 | 0.339377437 | 0.900151743 |
| g MGYG-HGUT-04443 | g Malassezia                   | -0.015033572 | 0.846178292 | 0.994526835 |
| g MGYG-HGUT-04443 | g unclassified_Fungi           | -0.088438402 | 0.252869059 | 0.874689648 |
| g MGYG-HGUT-04443 | g Fusarium                     | -0.08795029  | 0.255507755 | 0.875348885 |
| g MGYG-HGUT-04443 | g Mycosphaerella               | 0.011121903  | 0.885882589 | 0.994526835 |
| g MGYG-HGUT-04443 | g Simplicillium                | -0.013958746 | 0.857053889 | 0.994526835 |
| g MGYG-HGUT-04443 | g unclassified_Cordycipitaceae | 0.105730174  | 0.171271671 | 0.867877301 |
| g MGYG-HGUT-04443 | g unidentified                 | -0.127445219 | 0.09869123  | 0.8415005   |
| g UBA1181         | g Verticillium                 | -0.038888119 | 0.615679145 | 0.95208495  |
| g UBA1181         | g unclassified_Tremellomycetes | -0.199506765 | 0.009307818 | 0.613926619 |
| g UBA1181         | g Candida                      | -0.061628881 | 0.426039975 | 0.918239588 |
| g UBA1181         | g Cladosporium                 | -0.113807382 | 0.140668369 | 0.849249996 |
| g UBA1181         | g Debaromyces                  | 0.001479691  | 0.984766729 | 0.999049974 |
| g UBA1181         | g Aspergillus                  | -0.053479745 | 0.489835035 | 0.932872225 |
| g UBA1181         | g Kazachstania                 | -0.018133649 | 0.814979471 | 0.991298695 |
| g UBA1181         | g Malassezia                   | -0.087930952 | 0.255612684 | 0.875383306 |
| g UBA1181         | g unclassified_Fungi           | -0.027688951 | 0.720827262 | 0.971835476 |
| g UBA1181         | g Fusarium                     | -0.056771139 | 0.463473695 | 0.927602832 |
| g UBA1181         | g Mycosphaerella               | -0.156545474 | 0.042099399 | 0.808354944 |
| g UBA1181         | g Simplicillium                | 0.051300297  | 0.507720919 | 0.936546622 |
| g UBA1181         | g unclassified_Cordycipitaceae | -0.059293612 | 0.443813033 | 0.921010267 |
| g UBA1181         | g unidentified                 | 0.094587204  | 0.221234466 | 0.874689648 |
| g MGYG-HGUT-03511 | g Verticillium                 | 0.010246302  | 0.894812806 | 0.995135868 |
| g MGYG-HGUT-03511 | g unclassified_Tremellomycetes | -0.226232236 | 0.003100086 | 0.550026842 |
| g MGYG-HGUT-03511 | g Candida                      | -0.038457444 | 0.619598116 | 0.952309753 |
| g MGYG-HGUT-03511 | g Cladosporium                 | -0.099085711 | 0.199944136 | 0.874689648 |
| g MGYG-HGUT-03511 | g Debaromyces                  | -0.031851788 | 0.680995955 | 0.963630166 |
| g MGYG-HGUT-03511 | g Aspergillus                  | 0.168958892  | 0.028093621 | 0.77775889  |
| g MGYG-HGUT-03511 | g Kazachstania                 | -0.126200769 | 0.102053772 | 0.841929371 |
| g MGYG-HGUT-03511 | g Malassezia                   | 0.000744608  | 0.992333988 | 0.999049974 |
| g MGYG-HGUT-03511 | g unclassified_Fungi           | 0.091884549  | 0.234774664 | 0.874689648 |
| g MGYG-HGUT-03511 | g Fusarium                     | -0.12685307  | 0.100280139 | 0.8415005   |
| g MGYG-HGUT-03511 | g Mycosphaerella               | -0.095520312 | 0.216691029 | 0.874689648 |
| g MGYG-HGUT-03511 | g Simplicillium                | 0.007557726  | 0.922311359 | 0.996251765 |
| g MGYG-HGUT-03511 | g unclassified_Cordycipitaceae | -0.098885394 | 0.200859456 | 0.874689648 |
| g MGYG-HGUT-03511 | g unidentified                 | 0.148430974  | 0.054108868 | 0.832568254 |
| g RF16            | g Verticillium                 | 0.029413817  | 0.704224649 | 0.967508066 |
| g RF16            | g unclassified_Tremellomycetes | -0.180121351 | 0.019108951 | 0.702895198 |
| g RF16            | g Candida                      | -0.061973594 | 0.423451777 | 0.918013177 |
| g RF16            | g Cladosporium                 | -0.067540694 | 0.382930564 | 0.905460587 |
| g RF16            | g Debaromyces                  | -0.123294193 | 0.110259425 | 0.843328451 |
| g RF16            | g Aspergillus                  | 0.106693121  | 0.167383294 | 0.864987015 |
| g RF16            | g Kazachstania                 | -0.0106709   | 0.890480628 | 0.994653074 |
| g RF16            | g Malassezia                   | -0.010418993 | 0.893050457 | 0.994757258 |
| g RF16            | g unclassified_Fungi           | 0.227779624  | 0.002897463 | 0.550026842 |
| g RF16            | g Fusarium                     | -0.053666511 | 0.488318106 | 0.932872225 |
| g RF16            | g Mycosphaerella               | -0.052016384 | 0.501807046 | 0.936281889 |
| g RF16            | g Simplicillium                | 0.050745118  | 0.512330738 | 0.938277062 |
| g RF16            | g unclassified_Cordycipitaceae | -0.100459732 | 0.193746988 | 0.874689648 |



|                   |                                |              |             |             |
|-------------------|--------------------------------|--------------|-------------|-------------|
| g RF16            | g unidentified                 | 0.233919887  | 0.002206197 | 0.550026842 |
| g Porphyromonas   | g Verticillium                 | 0.099414196  | 0.198449705 | 0.874689648 |
| g Porphyromonas   | g unclassified Tremellomycetes | -0.14511614  | 0.059770085 | 0.832568254 |
| g Porphyromonas   | g Candida                      | -0.030988671 | 0.689186764 | 0.96434561  |
| g Porphyromonas   | g Cladosporium                 | -0.122411356 | 0.112851486 | 0.843328451 |
| g Porphyromonas   | g Debaromyces                  | 0.041847509  | 0.589047537 | 0.947252808 |
| g Porphyromonas   | g Aspergillus                  | 0.028702222  | 0.711057687 | 0.968802592 |
| g Porphyromonas   | g Kazachstania                 | -0.148350869 | 0.054240251 | 0.832568254 |
| g Porphyromonas   | g Malassezia                   | -0.069218827 | 0.371193775 | 0.901117392 |
| g Porphyromonas   | g unclassified Fungi           | 0.032503292  | 0.674837845 | 0.961701261 |
| g Porphyromonas   | g Fusarium                     | -0.0267758   | 0.729670427 | 0.973325332 |
| g Porphyromonas   | g Mycosphaerella               | -0.015617584 | 0.840281002 | 0.994526835 |
| g Porphyromonas   | g Simplicillium                | -0.008583271 | 0.911809499 | 0.996251765 |
| g Porphyromonas   | g unclassified Cordycipitaceae | -0.013639878 | 0.860285621 | 0.994526835 |
| g Porphyromonas   | g unidentified                 | 0.051803737  | 0.503559436 | 0.936546622 |
| g F082            | g Verticillium                 | 0.026611002  | 0.731270207 | 0.973693103 |
| g F082            | g unclassified Tremellomycetes | -0.234082821 | 0.00219009  | 0.550026842 |
| g F082            | g Candida                      | -0.081154881 | 0.294217405 | 0.892181547 |
| g F082            | g Cladosporium                 | -0.100949182 | 0.191573569 | 0.874689648 |
| g F082            | g Debaromyces                  | -0.055907508 | 0.470313887 | 0.928769554 |
| g F082            | g Aspergillus                  | 0.08702165   | 0.260580132 | 0.878368327 |
| g F082            | g Kazachstania                 | -0.057603124 | 0.456936437 | 0.924332119 |
| g F082            | g Malassezia                   | -0.063277759 | 0.413742633 | 0.915150306 |
| g F082            | g unclassified Fungi           | 0.032867894  | 0.671400933 | 0.96129685  |
| g F082            | g Fusarium                     | -0.049713524 | 0.520953454 | 0.939650241 |
| g F082            | g Mycosphaerella               | -0.030320648 | 0.695551106 | 0.966639149 |
| g F082            | g Simplicillium                | -0.082942879 | 0.283673602 | 0.8902203   |
| g F082            | g unclassified Cordycipitaceae | -0.143095144 | 0.063454454 | 0.835729559 |
| g F082            | g unidentified                 | 0.036256955  | 0.639787322 | 0.955341199 |
| g MGYG-HGUT-03423 | g Verticillium                 | -0.01455658  | 0.851001272 | 0.994526835 |
| g MGYG-HGUT-03423 | g unclassified Tremellomycetes | -0.184414692 | 0.016385142 | 0.702895198 |
| g MGYG-HGUT-03423 | g Candida                      | 0.071816268  | 0.353469176 | 0.900151743 |
| g MGYG-HGUT-03423 | g Cladosporium                 | -0.022256423 | 0.77394255  | 0.984510076 |
| g MGYG-HGUT-03423 | g Debaromyces                  | 0.014176751  | 0.854845768 | 0.994526835 |
| g MGYG-HGUT-03423 | g Aspergillus                  | -0.01053087  | 0.891909009 | 0.994653074 |
| g MGYG-HGUT-03423 | g Kazachstania                 | 0.145528086  | 0.05904109  | 0.832568254 |
| g MGYG-HGUT-03423 | g Malassezia                   | -0.064721789 | 0.403146066 | 0.912136453 |
| g MGYG-HGUT-03423 | g unclassified Fungi           | 0.157603974  | 0.040711799 | 0.808354944 |
| g MGYG-HGUT-03423 | g Fusarium                     | 0.008002422  | 0.917755794 | 0.996251765 |
| g MGYG-HGUT-03423 | g Mycosphaerella               | -0.044627582 | 0.564520601 | 0.942564508 |
| g MGYG-HGUT-03423 | g Simplicillium                | 0.044205097  | 0.568216365 | 0.942564508 |
| g MGYG-HGUT-03423 | g unclassified Cordycipitaceae | -0.149199844 | 0.052861165 | 0.832568254 |
| g MGYG-HGUT-03423 | g unidentified                 | 0.085976656  | 0.266370098 | 0.878368327 |
| g UBA1820         | g Verticillium                 | 0.196624342  | 0.01040091  | 0.613926619 |
| g UBA1820         | g unclassified Tremellomycetes | -0.041976386 | 0.587899829 | 0.947150582 |
| g UBA1820         | g Candida                      | 0.016046959  | 0.835950856 | 0.994526835 |
| g UBA1820         | g Cladosporium                 | -0.000174838 | 0.998199956 | 0.999334917 |
| g UBA1820         | g Debaromyces                  | -0.055518085 | 0.473416201 | 0.928769554 |
| g UBA1820         | g Aspergillus                  | 0.003406524  | 0.964939263 | 0.998625698 |
| g UBA1820         | g Kazachstania                 | -0.113628849 | 0.141296441 | 0.849249996 |
| g UBA1820         | g Malassezia                   | 0.001241494  | 0.987218723 | 0.999049974 |
| g UBA1820         | g unclassified Fungi           | -0.064138788 | 0.407404702 | 0.913116876 |
| g UBA1820         | g Fusarium                     | -0.099776076 | 0.196812736 | 0.874689648 |
| g UBA1820         | g Mycosphaerella               | -0.111026575 | 0.150695196 | 0.84984956  |
| g UBA1820         | g Simplicillium                | 0.012898015  | 0.867813312 | 0.994526835 |
| g UBA1820         | g unclassified Cordycipitaceae | 0.055514481  | 0.473444961 | 0.928769554 |
| g UBA1820         | g unidentified                 | 0.025639134  | 0.740728019 | 0.977217936 |
| g CAG-180         | g Verticillium                 | 0.013127319  | 0.865485262 | 0.994526835 |
| g CAG-180         | g unclassified Tremellomycetes | -0.138493657 | 0.072539226 | 0.8415005   |
| g CAG-180         | g Candida                      | -0.061444863 | 0.427425369 | 0.918239588 |
| g CAG-180         | g Cladosporium                 | -0.027054826 | 0.726964432 | 0.972631421 |
| g CAG-180         | g Debaromyces                  | -0.074483041 | 0.335833225 | 0.900151743 |
| g CAG-180         | g Aspergillus                  | 0.033282264  | 0.667503143 | 0.960290166 |
| g CAG-180         | g Kazachstania                 | -0.007485911 | 0.923047289 | 0.996251765 |
| g CAG-180         | g Malassezia                   | 0.058550687  | 0.44955398  | 0.922032734 |
| g CAG-180         | g unclassified Fungi           | -0.010543791 | 0.891777194 | 0.994653074 |
| g CAG-180         | g Fusarium                     | -0.095691298 | 0.215865738 | 0.874689648 |
| g CAG-180         | g Mycosphaerella               | -0.072378021 | 0.349706754 | 0.900151743 |
| g CAG-180         | g Simplicillium                | 0.111516389  | 0.14889095  | 0.849249996 |
| g CAG-180         | g unclassified Cordycipitaceae | -0.113925055 | 0.140255568 | 0.849249996 |
| g CAG-180         | g unidentified                 | 0.117206964  | 0.129110786 | 0.849249996 |
| g Ruminococcus_E  | g Verticillium                 | 0.045576849  | 0.556258768 | 0.942564508 |
| g Ruminococcus_E  | g unclassified Tremellomycetes | 0.037680426  | 0.626695772 | 0.952865795 |
| g Ruminococcus_E  | g Candida                      | -0.035503103 | 0.646766068 | 0.955501166 |
| g Ruminococcus_E  | g Cladosporium                 | 0.012620209  | 0.8706353   | 0.994526835 |
| g Ruminococcus_E  | g Debaromyces                  | -0.150903051 | 0.050181951 | 0.832568254 |
| g Ruminococcus_E  | g Aspergillus                  | 0.024417491  | 0.752671679 | 0.980305754 |
| g Ruminococcus_E  | g Kazachstania                 | 0.037264321  | 0.630510857 | 0.953934596 |

|                   |                                |              |             |             |
|-------------------|--------------------------------|--------------|-------------|-------------|
| g Ruminococcus E  | g Malassezia                   | 0.069191143  | 0.371385579 | 0.901117392 |
| g Ruminococcus E  | g unclassified Fungi           | -0.086715079 | 0.262269724 | 0.878368327 |
| g Ruminococcus E  | g Fusarium                     | -0.151605383 | 0.049110491 | 0.832568254 |
| g Ruminococcus E  | g Mycosphaerella               | -0.069040954 | 0.372427221 | 0.901117392 |
| g Ruminococcus E  | g Simplicillium                | 0.108810004  | 0.159066972 | 0.85940316  |
| g Ruminococcus E  | g unclassified Cordycipitaceae | 0.065989552  | 0.393977167 | 0.907694413 |
| g Ruminococcus E  | g unidentified                 | 0.010064806  | 0.896665575 | 0.995280411 |
| g CAG-177         | g Verticillium                 | -0.014447582 | 0.852104153 | 0.994526835 |
| g CAG-177         | g unclassified Tremellomycetes | -0.084180032 | 0.276528373 | 0.888419029 |
| g CAG-177         | g Candida                      | -0.004089153 | 0.957919411 | 0.997257748 |
| g CAG-177         | g Cladosporium                 | -0.002321695 | 0.976100492 | 0.998625698 |
| g CAG-177         | g Debaromyces                  | -0.030074658 | 0.697900072 | 0.967320417 |
| g CAG-177         | g Aspergillus                  | 0.042437989  | 0.583797493 | 0.945028002 |
| g CAG-177         | g Kazachstania                 | -0.033621832 | 0.664315584 | 0.959259869 |
| g CAG-177         | g Malassezia                   | 0.117342303  | 0.128666277 | 0.849249996 |
| g CAG-177         | g unclassified Fungi           | 0.036435259  | 0.638141263 | 0.954676713 |
| g CAG-177         | g Fusarium                     | -0.030164984 | 0.697037217 | 0.967127531 |
| g CAG-177         | g Mycosphaerella               | -0.086209921 | 0.265070108 | 0.878368327 |
| g CAG-177         | g Simplicillium                | 0.127977087  | 0.097281116 | 0.8415005   |
| g CAG-177         | g unclassified Cordycipitaceae | -0.040055444 | 0.605111695 | 0.95081632  |
| g CAG-177         | g unidentified                 | 0.074083964  | 0.338436078 | 0.900151743 |
| g UBA737          | g Verticillium                 | 0.035037868  | 0.651088426 | 0.955597379 |
| g UBA737          | g unclassified Tremellomycetes | -0.165304402 | 0.031729111 | 0.796627796 |
| g UBA737          | g Candida                      | -0.101640635 | 0.188533522 | 0.873641816 |
| g UBA737          | g Cladosporium                 | -0.006889616 | 0.929160323 | 0.996251765 |
| g UBA737          | g Debaromyces                  | -0.078222316 | 0.312067707 | 0.898139407 |
| g UBA737          | g Aspergillus                  | -0.088582023 | 0.252096252 | 0.874689648 |
| g UBA737          | g Kazachstania                 | -0.047299208 | 0.541419345 | 0.94160936  |
| g UBA737          | g Malassezia                   | 0.085967665  | 0.266420297 | 0.878368327 |
| g UBA737          | g unclassified Fungi           | 0.00729446   | 0.925009511 | 0.996251765 |
| g UBA737          | g Fusarium                     | -0.078337707 | 0.311352236 | 0.897967316 |
| g UBA737          | g Mycosphaerella               | -0.070924293 | 0.359495184 | 0.900151743 |
| g UBA737          | g Simplicillium                | 0.132633735  | 0.085606205 | 0.8415005   |
| g UBA737          | g unclassified Cordycipitaceae | -0.022135112 | 0.775141759 | 0.984510076 |
| g UBA737          | g unidentified                 | 0.117741439  | 0.12736222  | 0.849249996 |
| g MGYG-HGUT-02711 | g Verticillium                 | 0.094100339  | 0.223631762 | 0.874689648 |
| g MGYG-HGUT-02711 | g unclassified Tremellomycetes | -0.087374448 | 0.258645023 | 0.878368327 |
| g MGYG-HGUT-02711 | g Candida                      | -0.04941189  | 0.523488625 | 0.939740222 |
| g MGYG-HGUT-02711 | g Cladosporium                 | 0.056520864  | 0.465450272 | 0.927602832 |
| g MGYG-HGUT-02711 | g Debaromyces                  | -0.073531124 | 0.342062952 | 0.900151743 |
| g MGYG-HGUT-02711 | g Aspergillus                  | -0.012135968 | 0.87555818  | 0.994526835 |
| g MGYG-HGUT-02711 | g Kazachstania                 | -0.1429066   | 0.063807462 | 0.836026573 |
| g MGYG-HGUT-02711 | g Malassezia                   | 0.115745958  | 0.133984869 | 0.849249996 |
| g MGYG-HGUT-02711 | g unclassified Fungi           | -0.011925873 | 0.877695539 | 0.994526835 |
| g MGYG-HGUT-02711 | g Fusarium                     | -0.052361716 | 0.498968059 | 0.936237403 |
| g MGYG-HGUT-02711 | g Mycosphaerella               | -0.144360378 | 0.061126742 | 0.832568254 |
| g MGYG-HGUT-02711 | g Simplicillium                | 0.142231842  | 0.065083992 | 0.836350979 |
| g MGYG-HGUT-02711 | g unclassified Cordycipitaceae | 0.045616378  | 0.555916007 | 0.942564508 |
| g MGYG-HGUT-02711 | g unidentified                 | 0.098312102  | 0.203495778 | 0.874689648 |
| g Eubacterium R   | g Verticillium                 | 0.098985896  | 0.200399851 | 0.874689648 |
| g Eubacterium R   | g unclassified Tremellomycetes | -0.138906643 | 0.071682989 | 0.8415005   |
| g Eubacterium R   | g Candida                      | -0.027831476 | 0.719450317 | 0.970984292 |
| g Eubacterium R   | g Cladosporium                 | 0.042055564  | 0.587195224 | 0.947150582 |
| g Eubacterium R   | g Debaromyces                  | 0.007547257  | 0.92241863  | 0.996251765 |
| g Eubacterium R   | g Aspergillus                  | -0.024723466 | 0.749674604 | 0.980027605 |
| g Eubacterium R   | g Kazachstania                 | -0.025323557 | 0.743807522 | 0.978404143 |
| g Eubacterium R   | g Malassezia                   | 0.128480756  | 0.095960522 | 0.8415005   |
| g Eubacterium R   | g unclassified Fungi           | -0.086981522 | 0.260800863 | 0.878368327 |
| g Eubacterium R   | g Fusarium                     | -0.103715354 | 0.179623642 | 0.872371283 |
| g Eubacterium R   | g Mycosphaerella               | 0.01837817   | 0.812530289 | 0.991049439 |
| g Eubacterium R   | g Simplicillium                | 0.134806347  | 0.080557313 | 0.8415005   |
| g Eubacterium R   | g unclassified Cordycipitaceae | 0.025136178  | 0.745637964 | 0.979082173 |
| g Eubacterium R   | g unidentified                 | 0.105032403  | 0.17413087  | 0.869335176 |
| g MGYG-HGUT-02848 | g Verticillium                 | 0.037521183  | 0.628154639 | 0.953026591 |
| g MGYG-HGUT-02848 | g unclassified Tremellomycetes | -0.033001136 | 0.670146619 | 0.961102551 |
| g MGYG-HGUT-02848 | g Candida                      | -0.023483896 | 0.761839063 | 0.982076388 |
| g MGYG-HGUT-02848 | g Cladosporium                 | -0.019626534 | 0.800055162 | 0.987507186 |
| g MGYG-HGUT-02848 | g Debaromyces                  | -0.100153096 | 0.19511772  | 0.874689648 |
| g MGYG-HGUT-02848 | g Aspergillus                  | 0.080858076  | 0.295992538 | 0.892181547 |
| g MGYG-HGUT-02848 | g Kazachstania                 | -0.017774655 | 0.818578481 | 0.992201042 |
| g MGYG-HGUT-02848 | g Malassezia                   | 0.050164969  | 0.517170901 | 0.938796978 |
| g MGYG-HGUT-02848 | g unclassified Fungi           | -0.104207577 | 0.177556075 | 0.872371283 |
| g MGYG-HGUT-02848 | g Fusarium                     | -0.070469066 | 0.362595108 | 0.901117392 |
| g MGYG-HGUT-02848 | g Mycosphaerella               | -0.03784649  | 0.625175949 | 0.952422937 |
| g MGYG-HGUT-02848 | g Simplicillium                | 0.001880037  | 0.980645931 | 0.998625698 |
| g MGYG-HGUT-02848 | g unclassified Cordycipitaceae | -0.076292691 | 0.32419112  | 0.899370541 |
| g MGYG-HGUT-02848 | g unidentified                 | 0.043093584  | 0.577993932 | 0.943818057 |
| g RUG806          | g Verticillium                 | 0.016723068  | 0.829142492 | 0.993650851 |

|                   |                                |              |             |             |
|-------------------|--------------------------------|--------------|-------------|-------------|
| g RUG806          | g unclassified Tremellomycetes | -0.198500971 | 0.009677121 | 0.613926619 |
| g RUG806          | g Candida                      | -0.011978076 | 0.877164383 | 0.994526835 |
| g RUG806          | g Cladosporium                 | 0.013495287  | 0.861751827 | 0.994526835 |
| g RUG806          | g Debaryomyces                 | -0.00583542  | 0.939977551 | 0.996925697 |
| g RUG806          | g Aspergillus                  | 0.01736913   | 0.822648542 | 0.992484281 |
| g RUG806          | g Kazachstania                 | -0.028827583 | 0.709852229 | 0.968802592 |
| g RUG806          | g Malassezia                   | 0.018792445  | 0.80838496  | 0.989408284 |
| g RUG806          | g unclassified Fungi           | -0.000438805 | 0.995482298 | 0.999049974 |
| g RUG806          | g Fusarium                     | -0.066413732 | 0.390937502 | 0.907694413 |
| g RUG806          | g Mycosphaerella               | -0.07409301  | 0.338376937 | 0.900151743 |
| g RUG806          | g Simplicillium                | 0.162487521  | 0.034797404 | 0.808354944 |
| g RUG806          | g unclassified Cordycipitaceae | -0.014092732 | 0.855696646 | 0.994526835 |
| g RUG806          | g unidentified                 | 0.174729699  | 0.023078314 | 0.764130246 |
| g An200           | g Verticillium                 | 0.127621952  | 0.098220883 | 0.8415005   |
| g An200           | g unclassified Tremellomycetes | -0.170980223 | 0.026240124 | 0.765986149 |
| g An200           | g Candida                      | -0.088218666 | 0.254054597 | 0.874689648 |
| g An200           | g Cladosporium                 | -0.047268558 | 0.541681695 | 0.94160936  |
| g An200           | g Debaryomyces                 | -0.063303705 | 0.413550805 | 0.915150306 |
| g An200           | g Aspergillus                  | 0.03658994   | 0.636714718 | 0.954338328 |
| g An200           | g Kazachstania                 | -0.095990458 | 0.214427198 | 0.874689648 |
| g An200           | g Malassezia                   | 0.117549774  | 0.127987152 | 0.849249996 |
| g An200           | g unclassified Fungi           | -0.023775948 | 0.758967638 | 0.982076388 |
| g An200           | g Fusarium                     | -0.077671862 | 0.315495507 | 0.898525398 |
| g An200           | g Mycosphaerella               | -0.069917162 | 0.366375546 | 0.901117392 |
| g An200           | g Simplicillium                | 0.145449042  | 0.0591804   | 0.832568254 |
| g An200           | g unclassified Cordycipitaceae | 0.054545481  | 0.481212869 | 0.932872225 |
| g An200           | g unidentified                 | 0.132510773  | 0.085899367 | 0.8415005   |
| g MGYG-HGUT-03581 | g Verticillium                 | 0.068965712  | 0.372949739 | 0.901117392 |
| g MGYG-HGUT-03581 | g unclassified Tremellomycetes | -0.144216501 | 0.061387856 | 0.832568254 |
| g MGYG-HGUT-03581 | g Candida                      | -0.001046437 | 0.989226719 | 0.999049974 |
| g MGYG-HGUT-03581 | g Cladosporium                 | 0.072875852  | 0.346393602 | 0.900151743 |
| g MGYG-HGUT-03581 | g Debaryomyces                 | -0.096424027 | 0.212354521 | 0.874689648 |
| g MGYG-HGUT-03581 | g Aspergillus                  | -0.081504879 | 0.292133238 | 0.892181547 |
| g MGYG-HGUT-03581 | g Kazachstania                 | 0.098498542  | 0.202635696 | 0.874689648 |
| g MGYG-HGUT-03581 | g Malassezia                   | 0.033175715  | 0.668504553 | 0.960389755 |
| g MGYG-HGUT-03581 | g unclassified Fungi           | 0.078090049  | 0.312889131 | 0.898306    |
| g MGYG-HGUT-03581 | g Fusarium                     | -0.105549453 | 0.172008832 | 0.867877301 |
| g MGYG-HGUT-03581 | g Mycosphaerella               | -0.012716735 | 0.869654591 | 0.994526835 |
| g MGYG-HGUT-03581 | g Simplicillium                | 0.140016072  | 0.069423401 | 0.837255296 |
| g MGYG-HGUT-03581 | g unclassified Cordycipitaceae | -0.069915977 | 0.366383689 | 0.901117392 |
| g MGYG-HGUT-03581 | g unidentified                 | 0.082884038  | 0.284016502 | 0.8902203   |
| g MGYG-HGUT-03916 | g Verticillium                 | 0.093172149  | 0.228253006 | 0.874689648 |
| g MGYG-HGUT-03916 | g unclassified Tremellomycetes | -0.154860221 | 0.044390343 | 0.817455693 |
| g MGYG-HGUT-03916 | g Candida                      | -0.012685943 | 0.869967421 | 0.994526835 |
| g MGYG-HGUT-03916 | g Cladosporium                 | -0.053992581 | 0.485675763 | 0.932872225 |
| g MGYG-HGUT-03916 | g Debaryomyces                 | -0.103358707 | 0.181132774 | 0.872371283 |
| g MGYG-HGUT-03916 | g Aspergillus                  | -0.05215273  | 0.50068513  | 0.936281889 |
| g MGYG-HGUT-03916 | g Kazachstania                 | -0.05797618  | 0.454021935 | 0.924307006 |
| g MGYG-HGUT-03916 | g Malassezia                   | 0.0771978    | 0.318467164 | 0.898525398 |
| g MGYG-HGUT-03916 | g unclassified Fungi           | 0.054474589  | 0.481783857 | 0.932872225 |
| g MGYG-HGUT-03916 | g Fusarium                     | -0.074426068 | 0.336204031 | 0.900151743 |
| g MGYG-HGUT-03916 | g Mycosphaerella               | -0.039022544 | 0.614458155 | 0.951172976 |
| g MGYG-HGUT-03916 | g Simplicillium                | 0.167879309  | 0.029128592 | 0.780931419 |
| g MGYG-HGUT-03916 | g unclassified Cordycipitaceae | 0.003902053  | 0.95984316  | 0.997919102 |
| g MGYG-HGUT-03916 | g unidentified                 | 0.108047772  | 0.162025001 | 0.859887758 |
| g Acutalibacter   | g Verticillium                 | 0.114501899  | 0.138245322 | 0.849249996 |
| g Acutalibacter   | g unclassified Tremellomycetes | -0.001726048 | 0.982230898 | 0.998625698 |
| g Acutalibacter   | g Candida                      | -0.043787565 | 0.571880036 | 0.94284582  |
| g Acutalibacter   | g Cladosporium                 | 0.031706107  | 0.682375861 | 0.963892039 |
| g Acutalibacter   | g Debaryomyces                 | -0.083086084 | 0.282840233 | 0.8902203   |
| g Acutalibacter   | g Aspergillus                  | -0.043536236 | 0.574090697 | 0.943352947 |
| g Acutalibacter   | g Kazachstania                 | -0.056724992 | 0.463837797 | 0.927602832 |
| g Acutalibacter   | g Malassezia                   | 0.052125532  | 0.50090882  | 0.936281889 |
| g Acutalibacter   | g unclassified Fungi           | -0.098345486 | 0.203341578 | 0.874689648 |
| g Acutalibacter   | g Fusarium                     | -0.071633372 | 0.354699598 | 0.900151743 |
| g Acutalibacter   | g Mycosphaerella               | -0.054808183 | 0.479100172 | 0.931740764 |
| g Acutalibacter   | g Simplicillium                | 0.130683431  | 0.090351489 | 0.8415005   |
| g Acutalibacter   | g unclassified Cordycipitaceae | 0.093404493  | 0.227089945 | 0.874689648 |
| g Acutalibacter   | g unidentified                 | 0.075551838  | 0.328925417 | 0.899622647 |
| g UBA5905         | g Verticillium                 | -0.019011287 | 0.806197325 | 0.989092622 |
| g UBA5905         | g unclassified Tremellomycetes | -0.1341097   | 0.082149451 | 0.8415005   |
| g UBA5905         | g Candida                      | 0.013749567  | 0.859173663 | 0.994526835 |
| g UBA5905         | g Cladosporium                 | -0.014555177 | 0.851015466 | 0.994526835 |
| g UBA5905         | g Debaryomyces                 | -0.009473322 | 0.902707428 | 0.995280411 |
| g UBA5905         | g Aspergillus                  | -0.029335912 | 0.704971587 | 0.967508066 |
| g UBA5905         | g Kazachstania                 | 0.036860511  | 0.634222578 | 0.954116909 |
| g UBA5905         | g Malassezia                   | 0.074593008  | 0.335118251 | 0.900151743 |
| g UBA5905         | g unclassified Fungi           | -0.103893594 | 0.178872912 | 0.872371283 |

|                   |                                |              |             |             |
|-------------------|--------------------------------|--------------|-------------|-------------|
| g UBA5905         | g Fusarium                     | -0.056736539 | 0.463746678 | 0.927602832 |
| g UBA5905         | g Mycosphaerella               | -0.104718164 | 0.175429977 | 0.871837921 |
| g UBA5905         | g Simplicillium                | 0.071496477  | 0.355622301 | 0.900151743 |
| g UBA5905         | g unclassified Cordycipitaceae | -0.012732632 | 0.869493094 | 0.994526835 |
| g UBA5905         | g unidentified                 | 0.085271634  | 0.270325597 | 0.881811135 |
| g GCA-900066995   | g Verticillium                 | 0.074499018  | 0.335729285 | 0.900151743 |
| g GCA-900066995   | g unclassified Tremellomycetes | 0.045016353  | 0.561129913 | 0.942564508 |
| g GCA-900066995   | g Candida                      | -0.013954534 | 0.857096562 | 0.994526835 |
| g GCA-900066995   | g Cladosporium                 | 0.011447863  | 0.882561775 | 0.994526835 |
| g GCA-900066995   | g Debaromyces                  | -0.113608316 | 0.141368809 | 0.849249996 |
| g GCA-900066995   | g Aspergillus                  | -0.071416386 | 0.356162829 | 0.900151743 |
| g GCA-900066995   | g Kazachstania                 | 0.044467371  | 0.565920725 | 0.942564508 |
| g GCA-900066995   | g Malassezia                   | -0.02360935  | 0.760605208 | 0.982076388 |
| g GCA-900066995   | g unclassified Fungi           | -0.159956028 | 0.037765528 | 0.808354944 |
| g GCA-900066995   | g Fusarium                     | -0.082505266 | 0.286230456 | 0.891214772 |
| g GCA-900066995   | g Mycosphaerella               | 0.01742921   | 0.822045241 | 0.992484281 |
| g GCA-900066995   | g Simplicillium                | -0.051915646 | 0.502636809 | 0.936281889 |
| g GCA-900066995   | g unclassified Cordycipitaceae | 0.103273385  | 0.181495187 | 0.872371283 |
| g GCA-900066995   | g unidentified                 | -0.107062164 | 0.165910645 | 0.864354699 |
| g Clostridium E   | g Verticillium                 | 0.02186976   | 0.777766708 | 0.984728744 |
| g Clostridium E   | g unclassified Tremellomycetes | 0.091978473  | 0.23429457  | 0.874689648 |
| g Clostridium E   | g Candida                      | 0.011815088  | 0.878822946 | 0.994526835 |
| g Clostridium E   | g Cladosporium                 | -0.00521104  | 0.946389688 | 0.99625697  |
| g Clostridium E   | g Debaromyces                  | -0.006209674 | 0.936135925 | 0.996251765 |
| g Clostridium E   | g Aspergillus                  | 0.008128262  | 0.916467136 | 0.996251765 |
| g Clostridium E   | g Kazachstania                 | -0.060783945 | 0.432422531 | 0.918239588 |
| g Clostridium E   | g Malassezia                   | -0.068083424 | 0.379110314 | 0.90490297  |
| g Clostridium E   | g unclassified Fungi           | -0.145109993 | 0.059781018 | 0.832568254 |
| g Clostridium E   | g Fusarium                     | -0.059384975 | 0.443109908 | 0.920619182 |
| g Clostridium E   | g Mycosphaerella               | 0.008229014  | 0.915435554 | 0.996251765 |
| g Clostridium E   | g Simplicillium                | -0.046042809 | 0.552224839 | 0.942564508 |
| g Clostridium E   | g unclassified Cordycipitaceae | 0.083704407  | 0.279260844 | 0.889320764 |
| g Clostridium E   | g unidentified                 | -0.0801335   | 0.300355868 | 0.893624742 |
| g CAG-488         | g Verticillium                 | 0.049345301  | 0.524049134 | 0.939740222 |
| g CAG-488         | g unclassified Tremellomycetes | -0.149095743 | 0.05302869  | 0.832568254 |
| g CAG-488         | g Candida                      | -0.078412258 | 0.310890561 | 0.897967316 |
| g CAG-488         | g Cladosporium                 | -0.036127661 | 0.640982043 | 0.955341199 |
| g CAG-488         | g Debaromyces                  | -0.131914207 | 0.087333103 | 0.8415005   |
| g CAG-488         | g Aspergillus                  | -0.03157601  | 0.683609041 | 0.963892039 |
| g CAG-488         | g Kazachstania                 | -0.002638454 | 0.972840955 | 0.998625698 |
| g CAG-488         | g Malassezia                   | 0.073227907  | 0.344062606 | 0.900151743 |
| g CAG-488         | g unclassified Fungi           | -0.04812334  | 0.534388781 | 0.940891392 |
| g CAG-488         | g Fusarium                     | -0.098384416 | 0.203161871 | 0.874689648 |
| g CAG-488         | g Mycosphaerella               | -0.061145052 | 0.429688077 | 0.918239588 |
| g CAG-488         | g Simplicillium                | 0.095272442  | 0.217891401 | 0.874689648 |
| g CAG-488         | g unclassified Cordycipitaceae | -0.045376277 | 0.557999546 | 0.942564508 |
| g CAG-488         | g unidentified                 | 0.119031167  | 0.123218009 | 0.849176369 |
| g UBA1691         | g Verticillium                 | 0.050749928  | 0.512290705 | 0.938277062 |
| g UBA1691         | g unclassified Tremellomycetes | 0.048162731  | 0.534053888 | 0.940891392 |
| g UBA1691         | g Candida                      | -0.011214407 | 0.884939963 | 0.994526835 |
| g UBA1691         | g Cladosporium                 | 0.028718733  | 0.71089888  | 0.968802592 |
| g UBA1691         | g Debaromyces                  | -0.086167154 | 0.265308127 | 0.878368327 |
| g UBA1691         | g Aspergillus                  | -0.00239859  | 0.975309185 | 0.998625698 |
| g UBA1691         | g Kazachstania                 | 0.025097974  | 0.746011338 | 0.979082173 |
| g UBA1691         | g Malassezia                   | -0.08605632  | 0.265925646 | 0.878368327 |
| g UBA1691         | g unclassified Fungi           | -0.124792296 | 0.105967823 | 0.841929371 |
| g UBA1691         | g Fusarium                     | -0.091930025 | 0.234542127 | 0.874689648 |
| g UBA1691         | g Mycosphaerella               | -0.029984764 | 0.698759195 | 0.967505184 |
| g UBA1691         | g Simplicillium                | 0.051614044  | 0.505125353 | 0.936546622 |
| g UBA1691         | g unclassified Cordycipitaceae | 0.109821991  | 0.155202523 | 0.851307059 |
| g UBA1691         | g unidentified                 | -0.023659227 | 0.760114832 | 0.982076388 |
| g MGYG-HGUT-00935 | g Verticillium                 | -0.004732796 | 0.951303415 | 0.99717368  |
| g MGYG-HGUT-00935 | g unclassified Tremellomycetes | 0.09207473   | 0.233803262 | 0.874689648 |
| g MGYG-HGUT-00935 | g Candida                      | -0.004248637 | 0.956279788 | 0.99717368  |
| g MGYG-HGUT-00935 | g Cladosporium                 | 0.018322196  | 0.813090776 | 0.991049439 |
| g MGYG-HGUT-00935 | g Debaromyces                  | -0.049894553 | 0.519434962 | 0.939250598 |
| g MGYG-HGUT-00935 | g Aspergillus                  | -0.011841137 | 0.87855783  | 0.994526835 |
| g MGYG-HGUT-00935 | g Kazachstania                 | -0.00388163  | 0.960053162 | 0.997919102 |
| g MGYG-HGUT-00935 | g Malassezia                   | -0.116585547 | 0.131166955 | 0.849249996 |
| g MGYG-HGUT-00935 | g unclassified Fungi           | -0.134317413 | 0.081672114 | 0.8415005   |
| g MGYG-HGUT-00935 | g Fusarium                     | -0.12582028  | 0.103099707 | 0.841929371 |
| g MGYG-HGUT-00935 | g Mycosphaerella               | 0.045558248  | 0.556420101 | 0.942564508 |
| g MGYG-HGUT-00935 | g Simplicillium                | -0.063839593 | 0.40960051  | 0.913116876 |
| g MGYG-HGUT-00935 | g unclassified Cordycipitaceae | 0.053741427  | 0.487710337 | 0.932872225 |
| g MGYG-HGUT-00935 | g unidentified                 | -0.110004971 | 0.154511385 | 0.850069503 |
| g CAG-217         | g Verticillium                 | 0.002467247  | 0.974602667 | 0.998625698 |
| g CAG-217         | g unclassified Tremellomycetes | -0.005062572 | 0.947914913 | 0.996925697 |
| g CAG-217         | g Candida                      | -0.10560383  | 0.171786783 | 0.867877301 |



|                         |                                |              |             |             |
|-------------------------|--------------------------------|--------------|-------------|-------------|
| g CAG-217               | g Cladosporium                 | -0.05162127  | 0.505065656 | 0.936546622 |
| g CAG-217               | g Debaryomyces                 | -0.010439916 | 0.892836974 | 0.994724541 |
| g CAG-217               | g Aspergillus                  | 0.073249316  | 0.343921179 | 0.900151743 |
| g CAG-217               | g Kazachstania                 | 0.008546368  | 0.912187147 | 0.996251765 |
| g CAG-217               | g Malassezia                   | 0.087089127  | 0.260209252 | 0.878368327 |
| g CAG-217               | g unclassified Fungi           | -0.016225453 | 0.834152227 | 0.994526835 |
| g CAG-217               | g Fusarium                     | 0.02076778   | 0.788694451 | 0.986710331 |
| g CAG-217               | g Mycosphaerella               | -0.019225295 | 0.804059466 | 0.988720167 |
| g CAG-217               | g Simplicillium                | 0.156078768  | 0.042723691 | 0.812441332 |
| g CAG-217               | g unclassified Cordycipitaceae | -0.130002903 | 0.092055805 | 0.8415005   |
| g CAG-217               | g unidentified                 | 0.043369232  | 0.575561862 | 0.943352947 |
| g Marseille-P4683       | g Verticillium                 | 0.090915034  | 0.239770769 | 0.874689648 |
| g Marseille-P4683       | g unclassified Tremellomycetes | 0.048154506  | 0.534123805 | 0.940891392 |
| g Marseille-P4683       | g Candida                      | -0.032150664 | 0.678168291 | 0.962963695 |
| g Marseille-P4683       | g Cladosporium                 | 0.120034142  | 0.120067947 | 0.849176369 |
| g Marseille-P4683       | g Debaryomyces                 | -0.137721715 | 0.074161921 | 0.8415005   |
| g Marseille-P4683       | g Aspergillus                  | -0.038909035 | 0.615489099 | 0.951970231 |
| g Marseille-P4683       | g Kazachstania                 | 0.01983229   | 0.798003756 | 0.987463135 |
| g Marseille-P4683       | g Malassezia                   | 0.098804802  | 0.201228568 | 0.874689648 |
| g Marseille-P4683       | g unclassified Fungi           | -0.040065343 | 0.605022423 | 0.95081632  |
| g Marseille-P4683       | g Fusarium                     | -0.064052697 | 0.408035816 | 0.913116876 |
| g Marseille-P4683       | g Mycosphaerella               | 0.024003635  | 0.75673133  | 0.981293944 |
| g Marseille-P4683       | g Simplicillium                | 0.074004545  | 0.33895559  | 0.900151743 |
| g Marseille-P4683       | g unclassified Cordycipitaceae | 0.146476115  | 0.057391183 | 0.832568254 |
| g Marseille-P4683       | g unidentified                 | 0.034350408  | 0.657496701 | 0.956614192 |
| g Clostridium A         | g Verticillium                 | 0.0867118    | 0.262287833 | 0.878368327 |
| g Clostridium A         | g unclassified Tremellomycetes | -0.183226022 | 0.017103158 | 0.702895198 |
| g Clostridium A         | g Candida                      | -0.033937864 | 0.661354356 | 0.959078166 |
| g Clostridium A         | g Cladosporium                 | -0.011420689 | 0.882838513 | 0.994526835 |
| g Clostridium A         | g Debaryomyces                 | -0.003406529 | 0.96493921  | 0.998625698 |
| g Clostridium A         | g Aspergillus                  | 0.00373151   | 0.961596879 | 0.998221928 |
| g Clostridium A         | g Kazachstania                 | 0.014979494  | 0.846724806 | 0.994526835 |
| g Clostridium A         | g Malassezia                   | 0.071983414  | 0.352347048 | 0.900151743 |
| g Clostridium A         | g unclassified Fungi           | -0.030889017 | 0.690134808 | 0.96434561  |
| g Clostridium A         | g Fusarium                     | -0.079108458 | 0.30660079  | 0.897967316 |
| g Clostridium A         | g Mycosphaerella               | -0.04108347  | 0.595872571 | 0.947600269 |
| g Clostridium A         | g Simplicillium                | 0.137817934  | 0.07395807  | 0.8415005   |
| g Clostridium A         | g unclassified Cordycipitaceae | 0.003928139  | 0.959574938 | 0.997919102 |
| g Clostridium A         | g unidentified                 | 0.090600722  | 0.241406307 | 0.874689648 |
| g UBA1417               | g Verticillium                 | -0.042900182 | 0.579703202 | 0.944602922 |
| g UBA1417               | g unclassified Tremellomycetes | -0.15204035  | 0.048456506 | 0.832568254 |
| g UBA1417               | g Candida                      | -0.028928863 | 0.70887885  | 0.968657831 |
| g UBA1417               | g Cladosporium                 | 0.005031893  | 0.948230111 | 0.996925697 |
| g UBA1417               | g Debaryomyces                 | -0.022031642 | 0.77616501  | 0.984510076 |
| g UBA1417               | g Aspergillus                  | -0.036207549 | 0.640243743 | 0.955341199 |
| g UBA1417               | g Kazachstania                 | -0.017941931 | 0.816901021 | 0.991841934 |
| g UBA1417               | g Malassezia                   | 0.106234126  | 0.169228437 | 0.864987015 |
| g UBA1417               | g unclassified Fungi           | -0.089205041 | 0.248762758 | 0.874689648 |
| g UBA1417               | g Fusarium                     | -0.093596681 | 0.226131063 | 0.874689648 |
| g UBA1417               | g Mycosphaerella               | -0.168875797 | 0.028172152 | 0.77775889  |
| g UBA1417               | g Simplicillium                | 0.019278945  | 0.803523744 | 0.988441342 |
| g UBA1417               | g unclassified Cordycipitaceae | -0.020420349 | 0.792148416 | 0.986710331 |
| g UBA1417               | g unidentified                 | 0.023951379  | 0.757244408 | 0.981293944 |
| g MGYG-HGUT-00932       | g Verticillium                 | -0.016392577 | 0.832468959 | 0.994526835 |
| g MGYG-HGUT-00932       | g unclassified Tremellomycetes | -0.009536102 | 0.902065883 | 0.995280411 |
| g MGYG-HGUT-00932       | g Candida                      | 0.032065332  | 0.678975162 | 0.962963695 |
| g MGYG-HGUT-00932       | g Cladosporium                 | 0.047686082  | 0.538113275 | 0.941323418 |
| g MGYG-HGUT-00932       | g Debaryomyces                 | -0.199606298 | 0.009271959 | 0.613922619 |
| g MGYG-HGUT-00932       | g Aspergillus                  | 0.093378256  | 0.227221072 | 0.874689648 |
| g MGYG-HGUT-00932       | g Kazachstania                 | 0.023622203  | 0.760478836 | 0.982076388 |
| g MGYG-HGUT-00932       | g Malassezia                   | -0.062655236 | 0.418360752 | 0.916661525 |
| g MGYG-HGUT-00932       | g unclassified Fungi           | 0.02220605   | 0.77444044  | 0.984510076 |
| g MGYG-HGUT-00932       | g Fusarium                     | -0.021526914 | 0.781161972 | 0.986171666 |
| g MGYG-HGUT-00932       | g Mycosphaerella               | 0.012671614  | 0.870113005 | 0.994526835 |
| g MGYG-HGUT-00932       | g Simplicillium                | 0.039615092  | 0.609088609 | 0.951102497 |
| g MGYG-HGUT-00932       | g unclassified Cordycipitaceae | -0.102849246 | 0.183304674 | 0.873537668 |
| g MGYG-HGUT-00932       | g unidentified                 | 0.023705506  | 0.759659922 | 0.982076388 |
| g Anaeromassilibacillus | g Verticillium                 | 0.048635016  | 0.530046834 | 0.940412658 |
| g Anaeromassilibacillus | g unclassified Tremellomycetes | -0.147680623 | 0.055349904 | 0.832568254 |
| g Anaeromassilibacillus | g Candida                      | -0.099810921 | 0.196655632 | 0.874689648 |
| g Anaeromassilibacillus | g Cladosporium                 | -0.022735706 | 0.769209918 | 0.98374619  |
| g Anaeromassilibacillus | g Debaryomyces                 | -0.098727934 | 0.201581075 | 0.874689648 |
| g Anaeromassilibacillus | g Aspergillus                  | -0.00558069  | 0.942593078 | 0.996925697 |
| g Anaeromassilibacillus | g Kazachstania                 | -0.136701803 | 0.076350822 | 0.8415005   |
| g Anaeromassilibacillus | g Malassezia                   | 0.018925721  | 0.807052501 | 0.989255135 |
| g Anaeromassilibacillus | g unclassified Fungi           | -0.011419989 | 0.882845648 | 0.994526835 |
| g Anaeromassilibacillus | g Fusarium                     | -0.075735603 | 0.327746976 | 0.899370541 |
| g Anaeromassilibacillus | g Mycosphaerella               | -0.086920323 | 0.261137744 | 0.878368327 |

|                         |                                |              |             |             |
|-------------------------|--------------------------------|--------------|-------------|-------------|
| g Anaeromassilibacillus | g Simplicillium                | 0.056845358  | 0.462888437 | 0.927602832 |
| g Anaeromassilibacillus | g unclassified Cordycipitaceae | -0.006069418 | 0.937575453 | 0.996251765 |
| g Anaeromassilibacillus | g unidentified                 | 0.132135568  | 0.086798885 | 0.8415005   |
| g MGYG-HGUT-03160       | g Verticillium                 | 0.010131663  | 0.895983008 | 0.995214763 |
| g MGYG-HGUT-03160       | g unclassified Tremellomycetes | 0.007468587  | 0.923224828 | 0.996251765 |
| g MGYG-HGUT-03160       | g Candida                      | -0.091187099 | 0.238361328 | 0.874689648 |
| g MGYG-HGUT-03160       | g Cladosporium                 | 0.06245732   | 0.419835249 | 0.916661525 |
| g MGYG-HGUT-03160       | g Debaromyces                  | -0.156754514 | 0.041822267 | 0.808354944 |
| g MGYG-HGUT-03160       | g Aspergillus                  | 0.001874434  | 0.980703594 | 0.998625698 |
| g MGYG-HGUT-03160       | g Kazachstania                 | 0.054902107  | 0.478346037 | 0.931740764 |
| g MGYG-HGUT-03160       | g Malassezia                   | -0.0608183   | 0.432161949 | 0.918239588 |
| g MGYG-HGUT-03160       | g unclassified Fungi           | 0.000173262  | 0.998216183 | 0.999334917 |
| g MGYG-HGUT-03160       | g Fusarium                     | -0.069685472 | 0.36796981  | 0.901117392 |
| g MGYG-HGUT-03160       | g Mycosphaerella               | 0.010294195  | 0.894324    | 0.995135868 |
| g MGYG-HGUT-03160       | g Simplicillium                | 0.029230778  | 0.70598003  | 0.967955381 |
| g MGYG-HGUT-03160       | g unclassified Cordycipitaceae | 0.005980555  | 0.9384876   | 0.996251765 |
| g MGYG-HGUT-03160       | g unidentified                 | 0.136540895  | 0.076700879 | 0.8415005   |
| g MGYG-HGUT-04236       | g Verticillium                 | -0.001609207 | 0.983433562 | 0.998696538 |
| g MGYG-HGUT-04236       | g unclassified Tremellomycetes | 0.159357244  | 0.038497985 | 0.808354944 |
| g MGYG-HGUT-04236       | g Candida                      | 0.01379593   | 0.858703739 | 0.994526835 |
| g MGYG-HGUT-04236       | g Cladosporium                 | 0.029335911  | 0.704971594 | 0.967508066 |
| g MGYG-HGUT-04236       | g Debaromyces                  | 0.06976279   | 0.367437305 | 0.901117392 |
| g MGYG-HGUT-04236       | g Aspergillus                  | 0.028324043  | 0.71469855  | 0.970380158 |
| g MGYG-HGUT-04236       | g Kazachstania                 | 0.042501825  | 0.583231212 | 0.945010741 |
| g MGYG-HGUT-04236       | g Malassezia                   | -0.059862033 | 0.439448732 | 0.91979111  |
| g MGYG-HGUT-04236       | g unclassified Fungi           | -0.078157929 | 0.312467398 | 0.898139407 |
| g MGYG-HGUT-04236       | g Fusarium                     | -0.091952042 | 0.234429601 | 0.874689648 |
| g MGYG-HGUT-04236       | g Mycosphaerella               | 0.088059446  | 0.254916027 | 0.874689648 |
| g MGYG-HGUT-04236       | g Simplicillium                | 0.002020749  | 0.979197677 | 0.998625698 |
| g MGYG-HGUT-04236       | g unclassified Cordycipitaceae | 0.074740765  | 0.334159105 | 0.900151743 |
| g MGYG-HGUT-04236       | g unidentified                 | -0.058596621 | 0.449197819 | 0.922032734 |
| g UBA4871               | g Verticillium                 | 0.016727355  | 0.829099361 | 0.993650851 |
| g UBA4871               | g unclassified Tremellomycetes | 0.033022739  | 0.669943343 | 0.961102551 |
| g UBA4871               | g Candida                      | -0.075444535 | 0.329614784 | 0.899978099 |
| g UBA4871               | g Cladosporium                 | 0.075135084  | 0.331608039 | 0.900151743 |
| g UBA4871               | g Debaromyces                  | -0.109979263 | 0.154608349 | 0.850069503 |
| g UBA4871               | g Aspergillus                  | -0.033501671 | 0.665442866 | 0.959776195 |
| g UBA4871               | g Kazachstania                 | 0.078030261  | 0.313260902 | 0.98307298  |
| g UBA4871               | g Malassezia                   | 0.002673503  | 0.972480311 | 0.998625698 |
| g UBA4871               | g unclassified Fungi           | -0.093958469 | 0.224333774 | 0.874689648 |
| g UBA4871               | g Fusarium                     | -0.110619253 | 0.152208121 | 0.84984956  |
| g UBA4871               | g Mycosphaerella               | 0.020724723  | 0.789122278 | 0.986710331 |
| g UBA4871               | g Simplicillium                | 0.10616409   | 0.169511303 | 0.865473868 |
| g UBA4871               | g unclassified Cordycipitaceae | 0.076865322  | 0.320562101 | 0.898741278 |
| g UBA4871               | g unidentified                 | 0.029817926  | 0.700354689 | 0.967505184 |
| g MGYG-HGUT-03211       | g Verticillium                 | 0.066744038  | 0.388580339 | 0.907127903 |
| g MGYG-HGUT-03211       | g unclassified Tremellomycetes | 0.048760555  | 0.528984268 | 0.940412658 |
| g MGYG-HGUT-03211       | g Candida                      | -0.051263914 | 0.508022353 | 0.936546622 |
| g MGYG-HGUT-03211       | g Cladosporium                 | 0.022111904  | 0.775371235 | 0.984510076 |
| g MGYG-HGUT-03211       | g Debaromyces                  | 0.011144048  | 0.885656915 | 0.994526835 |
| g MGYG-HGUT-03211       | g Aspergillus                  | -0.085178785 | 0.270849486 | 0.882364885 |
| g MGYG-HGUT-03211       | g Kazachstania                 | -0.088318332 | 0.253516397 | 0.874689648 |
| g MGYG-HGUT-03211       | g Malassezia                   | 0.061377251  | 0.427935043 | 0.918239588 |
| g MGYG-HGUT-03211       | g unclassified Fungi           | -0.117564429 | 0.127939283 | 0.849249996 |
| g MGYG-HGUT-03211       | g Fusarium                     | -0.004079338 | 0.958020315 | 0.997257748 |
| g MGYG-HGUT-03211       | g Mycosphaerella               | -0.059551075 | 0.441833217 | 0.92043404  |
| g MGYG-HGUT-03211       | g Simplicillium                | 0.068111638  | 0.378912354 | 0.90490297  |
| g MGYG-HGUT-03211       | g unclassified Cordycipitaceae | 0.028023119  | 0.71760026  | 0.97067915  |
| g MGYG-HGUT-03211       | g unidentified                 | 0.014730422  | 0.849242861 | 0.994526835 |
| g MGYG-HGUT-04106       | g Verticillium                 | 0.030479249  | 0.694038148 | 0.966086731 |
| g MGYG-HGUT-04106       | g unclassified Tremellomycetes | -0.140529752 | 0.068396995 | 0.836518447 |
| g MGYG-HGUT-04106       | g Candida                      | -0.07372293  | 0.340801836 | 0.900151743 |
| g MGYG-HGUT-04106       | g Cladosporium                 | -0.035791576 | 0.644091866 | 0.955501166 |
| g MGYG-HGUT-04106       | g Debaromyces                  | -0.037752082 | 0.626039785 | 0.952753622 |
| g MGYG-HGUT-04106       | g Aspergillus                  | 0.001633301  | 0.983185559 | 0.998664535 |
| g MGYG-HGUT-04106       | g Kazachstania                 | -0.045052483 | 0.560815301 | 0.942564508 |
| g MGYG-HGUT-04106       | g Malassezia                   | 0.049963436  | 0.518857758 | 0.939250598 |
| g MGYG-HGUT-04106       | g unclassified Fungi           | -0.018367297 | 0.812639158 | 0.991049439 |
| g MGYG-HGUT-04106       | g Fusarium                     | -0.034224256 | 0.658675386 | 0.956966684 |
| g MGYG-HGUT-04106       | g Mycosphaerella               | -0.047966694 | 0.535721582 | 0.941323418 |
| g MGYG-HGUT-04106       | g Simplicillium                | 0.089972565  | 0.244698241 | 0.874689648 |
| g MGYG-HGUT-04106       | g unclassified Cordycipitaceae | -0.017357562 | 0.822764717 | 0.992484281 |
| g MGYG-HGUT-04106       | g unidentified                 | 0.152192891  | 0.04822888  | 0.832568254 |
| g MGYG-HGUT-00456       | g Verticillium                 | -0.032533758 | 0.674550401 | 0.961701261 |
| g MGYG-HGUT-00456       | g unclassified Tremellomycetes | 0.005117846  | 0.947347056 | 0.996925697 |
| g MGYG-HGUT-00456       | g Candida                      | -0.085708988 | 0.267867168 | 0.879794408 |
| g MGYG-HGUT-00456       | g Cladosporium                 | 0.055635916  | 0.472476333 | 0.928769554 |
| g MGYG-HGUT-00456       | g Debaromyces                  | -0.01770241  | 0.819303218 | 0.992339735 |

|                   |                                |              |             |             |
|-------------------|--------------------------------|--------------|-------------|-------------|
| g MGYG-HGUT-00456 | g Aspergillus                  | -0.066523618 | 0.39015237  | 0.907694413 |
| g MGYG-HGUT-00456 | g Kazachstania                 | -0.017238527 | 0.82396035  | 0.992484281 |
| g MGYG-HGUT-00456 | g Malassezia                   | 0.005752978  | 0.940823986 | 0.996925697 |
| g MGYG-HGUT-00456 | g unclassified_Fungi           | -0.044123397 | 0.56893238  | 0.942564508 |
| g MGYG-HGUT-00456 | g Fusarium                     | -0.053280075 | 0.491459545 | 0.933156156 |
| g MGYG-HGUT-00456 | g Mycosphaerella               | -0.092400499 | 0.232145865 | 0.874689648 |
| g MGYG-HGUT-00456 | g Simplicillium                | 0.057867517  | 0.454869792 | 0.924332119 |
| g MGYG-HGUT-00456 | g unclassified_Cordycipitaceae | -0.046681779 | 0.546716372 | 0.942564508 |
| g MGYG-HGUT-00456 | g unidentified                 | 0.063810163  | 0.409816872 | 0.913116876 |
| g MGYG-HGUT-04131 | g Verticillium                 | -0.002429606 | 0.974990007 | 0.998625698 |
| g MGYG-HGUT-04131 | g unclassified_Tremellomycetes | -0.12060019  | 0.118317942 | 0.849176369 |
| g MGYG-HGUT-04131 | g Candida                      | -0.022716957 | 0.769394896 | 0.98374619  |
| g MGYG-HGUT-04131 | g Cladosporium                 | -0.002603352 | 0.973202145 | 0.998625698 |
| g MGYG-HGUT-04131 | g Debaryomyces                 | -0.09346532  | 0.226786152 | 0.874689648 |
| g MGYG-HGUT-04131 | g Aspergillus                  | -0.024920937 | 0.74774233  | 0.979147232 |
| g MGYG-HGUT-04131 | g Kazachstania                 | 0.009576531  | 0.901652768 | 0.995280411 |
| g MGYG-HGUT-04131 | g Malassezia                   | 0.048446367  | 0.531645593 | 0.940412658 |
| g MGYG-HGUT-04131 | g unclassified_Fungi           | -0.017420046 | 0.822137259 | 0.992484281 |
| g MGYG-HGUT-04131 | g Fusarium                     | -0.043894956 | 0.570936667 | 0.942564508 |
| g MGYG-HGUT-04131 | g Mycosphaerella               | -0.113175397 | 0.142901255 | 0.849249996 |
| g MGYG-HGUT-04131 | g Simplicillium                | 0.088604611  | 0.251974855 | 0.874689648 |
| g MGYG-HGUT-04131 | g unclassified_Cordycipitaceae | -0.017877173 | 0.817550322 | 0.991841934 |
| g MGYG-HGUT-04131 | g unidentified                 | 0.111268635  | 0.149801507 | 0.849249996 |
| g CAG-964         | g Verticillium                 | 0.058847713  | 0.447253724 | 0.921206729 |
| g CAG-964         | g unclassified_Tremellomycetes | -0.053082858 | 0.493066905 | 0.933370788 |
| g CAG-964         | g Candida                      | -0.137247781 | 0.075172657 | 0.8415005   |
| g CAG-964         | g Cladosporium                 | -0.01494837  | 0.847039378 | 0.994526835 |
| g CAG-964         | g Debaryomyces                 | -0.213734467 | 0.005266833 | 0.613922619 |
| g CAG-964         | g Aspergillus                  | 0.000513937  | 0.994708793 | 0.999049974 |
| g CAG-964         | g Kazachstania                 | 0.071226354  | 0.357447395 | 0.900151743 |
| g CAG-964         | g Malassezia                   | 0.051395466  | 0.506932872 | 0.936546622 |
| g CAG-964         | g unclassified_Fungi           | 0.00203109   | 0.979091246 | 0.998625698 |
| g CAG-964         | g Fusarium                     | -0.137721275 | 0.074162854 | 0.8415005   |
| g CAG-964         | g Mycosphaerella               | -0.101000309 | 0.191347567 | 0.874689648 |
| g CAG-964         | g Simplicillium                | 0.072082632  | 0.351682015 | 0.900151743 |
| g CAG-964         | g unclassified_Cordycipitaceae | 0.03856276   | 0.618638791 | 0.952309753 |
| g CAG-964         | g unidentified                 | 0.090519074  | 0.241832439 | 0.874689648 |
| g MGYG-HGUT-03055 | g Verticillium                 | -0.009837738 | 0.898984334 | 0.995280411 |
| g MGYG-HGUT-03055 | g unclassified_Tremellomycetes | 0.086132265  | 0.265502406 | 0.878368327 |
| g MGYG-HGUT-03055 | g Candida                      | -0.185507606 | 0.015748271 | 0.702895198 |
| g MGYG-HGUT-03055 | g Cladosporium                 | 0.008995205  | 0.90759538  | 0.996251765 |
| g MGYG-HGUT-03055 | g Debaryomyces                 | -0.09646221  | 0.212172675 | 0.874689648 |
| g MGYG-HGUT-03055 | g Aspergillus                  | -0.074479659 | 0.335855227 | 0.900151743 |
| g MGYG-HGUT-03055 | g Kazachstania                 | -0.009146399 | 0.906049292 | 0.995855465 |
| g MGYG-HGUT-03055 | g Malassezia                   | 0.006225704  | 0.935971417 | 0.996251765 |
| g MGYG-HGUT-03055 | g unclassified_Fungi           | -0.14210636  | 0.06532367  | 0.836350979 |
| g MGYG-HGUT-03055 | g Fusarium                     | -0.043984935 | 0.570146812 | 0.942564508 |
| g MGYG-HGUT-03055 | g Mycosphaerella               | -0.139432312 | 0.070605018 | 0.8415005   |
| g MGYG-HGUT-03055 | g Simplicillium                | 0.054266189  | 0.483464487 | 0.932872225 |
| g MGYG-HGUT-03055 | g unclassified_Cordycipitaceae | -0.009413119 | 0.903322711 | 0.995280411 |
| g MGYG-HGUT-03055 | g unidentified                 | 0.078730971  | 0.308921902 | 0.897967316 |
| g MGYG-HGUT-04159 | g Verticillium                 | 0.08005395   | 0.300837487 | 0.894177403 |
| g MGYG-HGUT-04159 | g unclassified_Tremellomycetes | -0.089506892 | 0.247158724 | 0.874689648 |
| g MGYG-HGUT-04159 | g Candida                      | -0.061187488 | 0.429367386 | 0.918239588 |
| g MGYG-HGUT-04159 | g Cladosporium                 | 0.024496166  | 0.751900686 | 0.980278684 |
| g MGYG-HGUT-04159 | g Debaryomyces                 | -0.049377749 | 0.523775967 | 0.939740222 |
| g MGYG-HGUT-04159 | g Aspergillus                  | 0.021065978  | 0.785733216 | 0.986710331 |
| g MGYG-HGUT-04159 | g Kazachstania                 | -0.088148028 | 0.254436523 | 0.874689648 |
| g MGYG-HGUT-04159 | g Malassezia                   | 0.114592644  | 0.137931097 | 0.849249996 |
| g MGYG-HGUT-04159 | g unclassified_Fungi           | 0.02023345   | 0.79400814  | 0.986867722 |
| g MGYG-HGUT-04159 | g Fusarium                     | -0.074009372 | 0.338924    | 0.900151743 |
| g MGYG-HGUT-04159 | g Mycosphaerella               | 0.039453685  | 0.610549197 | 0.951172976 |
| g MGYG-HGUT-04159 | g Simplicillium                | 0.099162256  | 0.199595172 | 0.874689648 |
| g MGYG-HGUT-04159 | g unclassified_Cordycipitaceae | 0.028944899  | 0.708724778 | 0.968657831 |
| g MGYG-HGUT-04159 | g unidentified                 | 0.120276022  | 0.119317706 | 0.849176369 |
| g MGYG-HGUT-04116 | g Verticillium                 | 0.112324763  | 0.145949087 | 0.849249996 |
| g MGYG-HGUT-04116 | g unclassified_Tremellomycetes | -0.116878771 | 0.13019361  | 0.849249996 |
| g MGYG-HGUT-04116 | g Candida                      | -0.034871493 | 0.652637004 | 0.955763754 |
| g MGYG-HGUT-04116 | g Cladosporium                 | 0.004093681  | 0.957872858 | 0.997257748 |
| g MGYG-HGUT-04116 | g Debaryomyces                 | -0.039830971 | 0.607137517 | 0.950933357 |
| g MGYG-HGUT-04116 | g Aspergillus                  | -0.106369927 | 0.168680952 | 0.864987015 |
| g MGYG-HGUT-04116 | g Kazachstania                 | -0.131965994 | 0.087207888 | 0.8415005   |
| g MGYG-HGUT-04116 | g Malassezia                   | 0.157805023  | 0.04045263  | 0.808354944 |
| g MGYG-HGUT-04116 | g unclassified_Fungi           | 0.007847307  | 0.919344531 | 0.996251765 |
| g MGYG-HGUT-04116 | g Fusarium                     | -0.029964841 | 0.698949655 | 0.967505184 |
| g MGYG-HGUT-04116 | g Mycosphaerella               | -0.082306746 | 0.287395426 | 0.891214772 |
| g MGYG-HGUT-04116 | g Simplicillium                | 0.08424935   | 0.276131658 | 0.888419029 |
| g MGYG-HGUT-04116 | g unclassified_Cordycipitaceae | 0.090901334  | 0.239841896 | 0.874689648 |

|   |                 |   |                              |              |             |             |
|---|-----------------|---|------------------------------|--------------|-------------|-------------|
| g | MGYG-HGUT-04116 | g | unidentified                 | 0.142105665  | 0.065324998 | 0.836350979 |
| g | MGYG-HGUT-02705 | g | Verticillium                 | 0.006218742  | 0.936042862 | 0.996251765 |
| g | MGYG-HGUT-02705 | g | unclassified Tremellomycetes | -0.000708048 | 0.992710383 | 0.999049974 |
| g | MGYG-HGUT-02705 | g | Candida                      | -0.060301152 | 0.436093989 | 0.919176572 |
| g | MGYG-HGUT-02705 | g | Cladosporium                 | 0.053532177  | 0.489408922 | 0.932872225 |
| g | MGYG-HGUT-02705 | g | Debaromyces                  | -0.16392952  | 0.03319671  | 0.808354944 |
| g | MGYG-HGUT-02705 | g | Aspergillus                  | 0.055186519  | 0.476066367 | 0.930780596 |
| g | MGYG-HGUT-02705 | g | Kazachstania                 | -0.030095255 | 0.697703287 | 0.967320417 |
| g | MGYG-HGUT-02705 | g | Malassezia                   | -0.003696985 | 0.961951933 | 0.998263857 |
| g | MGYG-HGUT-02705 | g | unclassified Fungi           | 0.034650937  | 0.654692161 | 0.956614192 |
| g | MGYG-HGUT-02705 | g | Fusarium                     | -0.048910675 | 0.527715052 | 0.940363396 |
| g | MGYG-HGUT-02705 | g | Mycosphaerella               | -0.099322698 | 0.198865158 | 0.874689648 |
| g | MGYG-HGUT-02705 | g | Simplicillium                | 0.124800866  | 0.105943655 | 0.841929371 |
| g | MGYG-HGUT-02705 | g | unclassified Cordycipitaceae | 0.083006272  | 0.283304492 | 0.8902203   |
| g | MGYG-HGUT-02705 | g | unidentified                 | 0.121841566  | 0.114549534 | 0.843328451 |
| g | MGYG-HGUT-02694 | g | Verticillium                 | 0.096166811  | 0.213582404 | 0.874689648 |
| g | MGYG-HGUT-02694 | g | unclassified Tremellomycetes | -0.007131036 | 0.926684835 | 0.996251765 |
| g | MGYG-HGUT-02694 | g | Candida                      | -0.099902146 | 0.196244763 | 0.874689648 |
| g | MGYG-HGUT-02694 | g | Cladosporium                 | 0.027571239  | 0.721965166 | 0.971954906 |
| g | MGYG-HGUT-02694 | g | Debaromyces                  | -0.043189009 | 0.577151446 | 0.943618965 |
| g | MGYG-HGUT-02694 | g | Aspergillus                  | -0.07908519  | 0.30674353  | 0.897967316 |
| g | MGYG-HGUT-02694 | g | Kazachstania                 | -0.035916775 | 0.642932664 | 0.955341199 |
| g | MGYG-HGUT-02694 | g | Malassezia                   | -0.00608012  | 0.937465597 | 0.996251765 |
| g | MGYG-HGUT-02694 | g | unclassified Fungi           | 0.032540918  | 0.674482849 | 0.961701261 |
| g | MGYG-HGUT-02694 | g | Fusarium                     | -0.129753441 | 0.092686931 | 0.8415005   |
| g | MGYG-HGUT-02694 | g | Mycosphaerella               | -0.058137652 | 0.452763665 | 0.923868417 |
| g | MGYG-HGUT-02694 | g | Simplicillium                | 0.076331133  | 0.323946671 | 0.899370541 |
| g | MGYG-HGUT-02694 | g | unclassified Cordycipitaceae | 0.091627106  | 0.236094138 | 0.874689648 |
| g | MGYG-HGUT-02694 | g | unidentified                 | 0.041170933  | 0.595089471 | 0.947273049 |
| g | MGYG-HGUT-01860 | g | Verticillium                 | -0.033919963 | 0.661521952 | 0.959170444 |
| g | MGYG-HGUT-01860 | g | unclassified Tremellomycetes | -0.115701936 | 0.134133891 | 0.849249996 |
| g | MGYG-HGUT-01860 | g | Candida                      | -0.063066553 | 0.415306082 | 0.915917523 |
| g | MGYG-HGUT-01860 | g | Cladosporium                 | 0.048219592  | 0.533570653 | 0.940891392 |
| g | MGYG-HGUT-01860 | g | Debaromyces                  | -0.063694082 | 0.410670937 | 0.913242396 |
| g | MGYG-HGUT-01860 | g | Aspergillus                  | -0.003188331 | 0.967183659 | 0.998625698 |
| g | MGYG-HGUT-01860 | g | Kazachstania                 | -0.007435629 | 0.923562595 | 0.996251765 |
| g | MGYG-HGUT-01860 | g | Malassezia                   | 0.07664263   | 0.32197026  | 0.898854824 |
| g | MGYG-HGUT-01860 | g | unclassified Fungi           | 0.001874799  | 0.980699841 | 0.998625698 |
| g | MGYG-HGUT-01860 | g | Fusarium                     | -0.046824883 | 0.545486394 | 0.942564508 |
| g | MGYG-HGUT-01860 | g | Mycosphaerella               | -0.048795716 | 0.528686856 | 0.940363396 |
| g | MGYG-HGUT-01860 | g | Simplicillium                | 0.158516311  | 0.039546823 | 0.808354944 |
| g | MGYG-HGUT-01860 | g | unclassified Cordycipitaceae | -0.050157658 | 0.51723204  | 0.938796978 |
| g | MGYG-HGUT-01860 | g | unidentified                 | 0.105145936  | 0.173663266 | 0.869335176 |
| g | MGYG-HGUT-04279 | g | Verticillium                 | -0.023645938 | 0.76024548  | 0.982076388 |
| g | MGYG-HGUT-04279 | g | unclassified Tremellomycetes | -0.215355136 | 0.004924827 | 0.613926619 |
| g | MGYG-HGUT-04279 | g | Candida                      | -0.045234076 | 0.559235302 | 0.942564508 |
| g | MGYG-HGUT-04279 | g | Cladosporium                 | -0.004314093 | 0.955606908 | 0.99717368  |
| g | MGYG-HGUT-04279 | g | Debaromyces                  | 0.035193494  | 0.649641246 | 0.955501166 |
| g | MGYG-HGUT-04279 | g | Aspergillus                  | 0.003188063  | 0.967186418 | 0.998625698 |
| g | MGYG-HGUT-04279 | g | Kazachstania                 | -0.036679819 | 0.635886421 | 0.954338328 |
| g | MGYG-HGUT-04279 | g | Malassezia                   | 0.075835253  | 0.327109087 | 0.899370541 |
| g | MGYG-HGUT-04279 | g | unclassified Fungi           | 0.016352183  | 0.832875732 | 0.994526835 |
| g | MGYG-HGUT-04279 | g | Fusarium                     | -0.08827508  | 0.253749863 | 0.874689648 |
| g | MGYG-HGUT-04279 | g | Mycosphaerella               | -0.085624802 | 0.268339203 | 0.880404513 |
| g | MGYG-HGUT-04279 | g | Simplicillium                | 0.10846393   | 0.160404939 | 0.859887758 |
| g | MGYG-HGUT-04279 | g | unclassified Cordycipitaceae | -0.074405453 | 0.336338269 | 0.900151743 |
| g | MGYG-HGUT-04279 | g | unidentified                 | 0.096447982  | 0.212240419 | 0.874689648 |
| g | MGYG-HGUT-00505 | g | Verticillium                 | 0.106409791  | 0.168520492 | 0.864987015 |
| g | MGYG-HGUT-00505 | g | unclassified Tremellomycetes | -0.186349843 | 0.015272303 | 0.702895198 |
| g | MGYG-HGUT-00505 | g | Candida                      | 0.047206582  | 0.542212374 | 0.941903852 |
| g | MGYG-HGUT-00505 | g | Cladosporium                 | 0.063188865  | 0.414400245 | 0.915276764 |
| g | MGYG-HGUT-00505 | g | Debaromyces                  | -0.039206191 | 0.612791777 | 0.951172976 |
| g | MGYG-HGUT-00505 | g | Aspergillus                  | -0.008530689 | 0.912347597 | 0.996251765 |
| g | MGYG-HGUT-00505 | g | Kazachstania                 | -0.066090994 | 0.393248952 | 0.907694413 |
| g | MGYG-HGUT-00505 | g | Malassezia                   | 0.03616256   | 0.640659471 | 0.955341199 |
| g | MGYG-HGUT-00505 | g | unclassified Fungi           | 0.040674601  | 0.599539542 | 0.948773896 |
| g | MGYG-HGUT-00505 | g | Fusarium                     | -0.093905264 | 0.224597452 | 0.874689648 |
| g | MGYG-HGUT-00505 | g | Mycosphaerella               | 0.029618017  | 0.702268164 | 0.967508066 |
| g | MGYG-HGUT-00505 | g | Simplicillium                | 0.09644957   | 0.21223286  | 0.874689648 |
| g | MGYG-HGUT-00505 | g | unclassified Cordycipitaceae | 0.007717529  | 0.920674003 | 0.996251765 |
| g | MGYG-HGUT-00505 | g | unidentified                 | 0.03016825   | 0.697006022 | 0.967127531 |
| g | MGYG-HGUT-00937 | g | Verticillium                 | 0.083870221  | 0.278306182 | 0.889320764 |
| g | MGYG-HGUT-00937 | g | unclassified Tremellomycetes | 0.067105457  | 0.386011    | 0.906174944 |
| g | MGYG-HGUT-00937 | g | Candida                      | -0.080466152 | 0.29834742  | 0.892181547 |
| g | MGYG-HGUT-00937 | g | Cladosporium                 | 0.076073242  | 0.325588864 | 0.899370541 |
| g | MGYG-HGUT-00937 | g | Debaromyces                  | -0.070650618 | 0.361356829 | 0.900157702 |
| g | MGYG-HGUT-00937 | g | Aspergillus                  | -0.0146263   | 0.850295967 | 0.994526835 |
| g | MGYG-HGUT-00937 | g | Kazachstania                 | 0.033647279  | 0.664076953 | 0.959259869 |



|                   |                                |              |             |             |
|-------------------|--------------------------------|--------------|-------------|-------------|
| g MGYG-HGUT-00937 | g Malassezia                   | 0.061143037  | 0.429703307 | 0.918239588 |
| g MGYG-HGUT-00937 | g unclassified Fungi           | -0.110140644 | 0.154000433 | 0.85006873  |
| g MGYG-HGUT-00937 | g Fusarium                     | -0.045235216 | 0.559225392 | 0.942564508 |
| g MGYG-HGUT-00937 | g Mycosphaerella               | 0.001871636  | 0.980732396 | 0.998625698 |
| g MGYG-HGUT-00937 | g Simplicillium                | 0.132413343  | 0.086132224 | 0.8415005   |
| g MGYG-HGUT-00937 | g unclassified Cordycipitaceae | 0.162202832  | 0.035121025 | 0.808354944 |
| g MGYG-HGUT-00937 | g unidentified                 | -0.067168639 | 0.385562897 | 0.906174944 |
| g MGYG-HGUT-02709 | g Verticillium                 | 0.171802547  | 0.025516612 | 0.765986149 |
| g MGYG-HGUT-02709 | g unclassified Tremellomycetes | 0.022270615  | 0.7738023   | 0.984510076 |
| g MGYG-HGUT-02709 | g Candida                      | -0.159924446 | 0.037803864 | 0.808354944 |
| g MGYG-HGUT-02709 | g Cladosporium                 | 0.082641795  | 0.285431104 | 0.891214772 |
| g MGYG-HGUT-02709 | g Debaromyces                  | -0.155382389 | 0.043669614 | 0.815882315 |
| g MGYG-HGUT-02709 | g Aspergillus                  | -0.103340869 | 0.181208498 | 0.872371283 |
| g MGYG-HGUT-02709 | g Kazachstania                 | -0.042597727 | 0.582380955 | 0.944873255 |
| g MGYG-HGUT-02709 | g Malassezia                   | 0.05441792   | 0.482240548 | 0.932872225 |
| g MGYG-HGUT-02709 | g unclassified Fungi           | -0.027100488 | 0.726521915 | 0.972631421 |
| g MGYG-HGUT-02709 | g Fusarium                     | -0.042589211 | 0.582456441 | 0.944873255 |
| g MGYG-HGUT-02709 | g Mycosphaerella               | 0.034848283  | 0.652853152 | 0.955763754 |
| g MGYG-HGUT-02709 | g Simplicillium                | 0.037738666  | 0.626162582 | 0.952753622 |
| g MGYG-HGUT-02709 | g unclassified Cordycipitaceae | 0.083830385  | 0.278535335 | 0.889320764 |
| g MGYG-HGUT-02709 | g unidentified                 | 0.097544537  | 0.207064435 | 0.874689648 |
| g MGYG-HGUT-04496 | g Verticillium                 | -0.028631248 | 0.711740485 | 0.968933484 |
| g MGYG-HGUT-04496 | g unclassified Tremellomycetes | -0.02964909  | 0.701970618 | 0.967505184 |
| g MGYG-HGUT-04496 | g Candida                      | -0.049772535 | 0.520458215 | 0.939569324 |
| g MGYG-HGUT-04496 | g Cladosporium                 | -0.064924865 | 0.401668885 | 0.911186903 |
| g MGYG-HGUT-04496 | g Debaromyces                  | -0.048825386 | 0.528435949 | 0.940363396 |
| g MGYG-HGUT-04496 | g Aspergillus                  | -0.001817863 | 0.981285866 | 0.998625698 |
| g MGYG-HGUT-04496 | g Kazachstania                 | -0.017290325 | 0.823440018 | 0.992484281 |
| g MGYG-HGUT-04496 | g Malassezia                   | -0.061794975 | 0.424791757 | 0.918239588 |
| g MGYG-HGUT-04496 | g unclassified Fungi           | -0.293524085 | 0.000107434 | 0.392677477 |
| g MGYG-HGUT-04496 | g Fusarium                     | 0.045668302  | 0.555465921 | 0.942564508 |
| g MGYG-HGUT-04496 | g Mycosphaerella               | 0.051141691  | 0.509035669 | 0.937011504 |
| g MGYG-HGUT-04496 | g Simplicillium                | 0.047397172  | 0.540581235 | 0.94160936  |
| g MGYG-HGUT-04496 | g unclassified Cordycipitaceae | 0.009699002  | 0.90040149  | 0.995280411 |
| g MGYG-HGUT-04496 | g unidentified                 | 0.021972382  | 0.776751234 | 0.984510076 |
| g An172           | g Verticillium                 | 0.043505265  | 0.574363389 | 0.943352947 |
| g An172           | g unclassified Tremellomycetes | -0.149165185 | 0.052916891 | 0.832568254 |
| g An172           | g Candida                      | -0.085270553 | 0.270331693 | 0.881811135 |
| g An172           | g Cladosporium                 | -0.169009902 | 0.028045506 | 0.7775889   |
| g An172           | g Debaromyces                  | -0.072555822 | 0.348521174 | 0.900151743 |
| g An172           | g Aspergillus                  | 0.064548037  | 0.404412492 | 0.912338681 |
| g An172           | g Kazachstania                 | 0.05124331   | 0.508193106 | 0.936546622 |
| g An172           | g Malassezia                   | -0.013141964 | 0.865336612 | 0.994526835 |
| g An172           | g unclassified Fungi           | -0.018826921 | 0.80804023  | 0.989341319 |
| g An172           | g Fusarium                     | -0.125329081 | 0.104462445 | 0.841929371 |
| g An172           | g Mycosphaerella               | -0.109494076 | 0.156446908 | 0.852150641 |
| g An172           | g Simplicillium                | 0.052581668  | 0.497164242 | 0.935069491 |
| g An172           | g unclassified Cordycipitaceae | -0.092659757 | 0.230832773 | 0.874689648 |
| g An172           | g unidentified                 | 0.068127169  | 0.37880341  | 0.90490297  |
| g MGYG-HGUT-01116 | g Verticillium                 | 0.021279609  | 0.783613656 | 0.986412495 |
| g MGYG-HGUT-01116 | g unclassified Tremellomycetes | -0.112407055 | 0.145652097 | 0.849249996 |
| g MGYG-HGUT-01116 | g Candida                      | -0.081012674 | 0.29506703  | 0.892181547 |
| g MGYG-HGUT-01116 | g Cladosporium                 | 0.044164857  | 0.568568976 | 0.942564508 |
| g MGYG-HGUT-01116 | g Debaromyces                  | -0.061117697 | 0.429894873 | 0.918239588 |
| g MGYG-HGUT-01116 | g Aspergillus                  | -0.088493301 | 0.252573463 | 0.874689648 |
| g MGYG-HGUT-01116 | g Kazachstania                 | -0.036713538 | 0.635575786 | 0.954242832 |
| g MGYG-HGUT-01116 | g Malassezia                   | 0.090680297  | 0.240991504 | 0.874689648 |
| g MGYG-HGUT-01116 | g unclassified Fungi           | -0.100391039 | 0.194053448 | 0.874689648 |
| g MGYG-HGUT-01116 | g Fusarium                     | -0.075083794 | 0.331939149 | 0.900151743 |
| g MGYG-HGUT-01116 | g Mycosphaerella               | -0.019690755 | 0.799414719 | 0.987463135 |
| g MGYG-HGUT-01116 | g Simplicillium                | 0.150112377  | 0.051411346 | 0.832568254 |
| g MGYG-HGUT-01116 | g unclassified Cordycipitaceae | 0.006152363  | 0.936724111 | 0.996251765 |
| g MGYG-HGUT-01116 | g unidentified                 | 0.072728981  | 0.347368986 | 0.900151743 |
| g MGYG-HGUT-02031 | g Verticillium                 | 0.013025563  | 0.86651821  | 0.994526835 |
| g MGYG-HGUT-02031 | g unclassified Tremellomycetes | -0.115007116 | 0.136502827 | 0.849249996 |
| g MGYG-HGUT-02031 | g Candida                      | -0.02297416  | 0.766858489 | 0.982494893 |
| g MGYG-HGUT-02031 | g Cladosporium                 | -0.076192702 | 0.324827501 | 0.899370541 |
| g MGYG-HGUT-02031 | g Debaromyces                  | -0.147665038 | 0.055375928 | 0.832568254 |
| g MGYG-HGUT-02031 | g Aspergillus                  | -0.001748853 | 0.981996164 | 0.998625698 |
| g MGYG-HGUT-02031 | g Kazachstania                 | -0.089049391 | 0.249592699 | 0.874689648 |
| g MGYG-HGUT-02031 | g Malassezia                   | 0.008546073  | 0.912190166 | 0.996251765 |
| g MGYG-HGUT-02031 | g unclassified Fungi           | 0.020527886  | 0.791078913 | 0.986710331 |
| g MGYG-HGUT-02031 | g Fusarium                     | -0.00848817  | 0.912782743 | 0.996251765 |
| g MGYG-HGUT-02031 | g Mycosphaerella               | -0.175662375 | 0.022344767 | 0.755138537 |
| g MGYG-HGUT-02031 | g Simplicillium                | 0.128504234  | 0.095899315 | 0.8415005   |
| g MGYG-HGUT-02031 | g unclassified Cordycipitaceae | -0.043435618 | 0.574976847 | 0.943352947 |
| g MGYG-HGUT-02031 | g unidentified                 | 0.150202686  | 0.051269674 | 0.832568254 |
| g MGYG-HGUT-01125 | g Verticillium                 | 0.183576546  | 0.016888633 | 0.702895198 |

|                   |                                |              |             |             |
|-------------------|--------------------------------|--------------|-------------|-------------|
| g MGYG-HGUT-01125 | g unclassified Tremellomycetes | 0.100160159  | 0.195086069 | 0.874689648 |
| g MGYG-HGUT-01125 | g Candida                      | -0.162987716 | 0.034234916 | 0.808354944 |
| g MGYG-HGUT-01125 | g Cladosporium                 | 0.146103858  | 0.058034455 | 0.832568254 |
| g MGYG-HGUT-01125 | g Debaromyces                  | -0.090404177 | 0.242432991 | 0.874689648 |
| g MGYG-HGUT-01125 | g Aspergillus                  | -0.095683031 | 0.215905588 | 0.874689648 |
| g MGYG-HGUT-01125 | g Kazachstania                 | -0.046627949 | 0.547179392 | 0.942564508 |
| g MGYG-HGUT-01125 | g Malassezia                   | 0.10623723   | 0.16921591  | 0.864987015 |
| g MGYG-HGUT-01125 | g unclassified Fungi           | -0.058207743 | 0.452218089 | 0.923868417 |
| g MGYG-HGUT-01125 | g Fusarium                     | -0.03845821  | 0.619591138 | 0.952309753 |
| g MGYG-HGUT-01125 | g Mycosphaerella               | -0.061650967 | 0.425873874 | 0.918239588 |
| g MGYG-HGUT-01125 | g Simplicillium                | 0.197850251  | 0.009922891 | 0.613926619 |
| g MGYG-HGUT-01125 | g unclassified Cordycipitaceae | 0.131859157  | 0.087466362 | 0.8415005   |
| g MGYG-HGUT-01125 | g unidentified                 | 0.021006675  | 0.786321881 | 0.986710331 |
| g MGYG-HGUT-03236 | g Verticillium                 | 0.113936066  | 0.140216989 | 0.849249996 |
| g MGYG-HGUT-03236 | g unclassified Tremellomycetes | -0.074448403 | 0.336058635 | 0.900151743 |
| g MGYG-HGUT-03236 | g Candida                      | -0.019163912 | 0.80467251  | 0.988868764 |
| g MGYG-HGUT-03236 | g Cladosporium                 | 0.02544326   | 0.742638944 | 0.977770666 |
| g MGYG-HGUT-03236 | g Debaromyces                  | -0.173993335 | 0.023672012 | 0.765986149 |
| g MGYG-HGUT-03236 | g Aspergillus                  | 0.042788697  | 0.580689552 | 0.944873255 |
| g MGYG-HGUT-03236 | g Kazachstania                 | -0.162484557 | 0.03480076  | 0.808354944 |
| g MGYG-HGUT-03236 | g Malassezia                   | 0.030718316  | 0.691759877 | 0.966086731 |
| g MGYG-HGUT-03236 | g unclassified Fungi           | 0.019108002  | 0.805230997 | 0.988960513 |
| g MGYG-HGUT-03236 | g Fusarium                     | -0.065412759 | 0.398133122 | 0.909588897 |
| g MGYG-HGUT-03236 | g Mycosphaerella               | -0.06242557  | 0.420072069 | 0.916661525 |
| g MGYG-HGUT-03236 | g Simplicillium                | 0.080747152  | 0.296657769 | 0.892181547 |
| g MGYG-HGUT-03236 | g unclassified Cordycipitaceae | 0.027890825  | 0.718877208 | 0.970778853 |
| g MGYG-HGUT-03236 | g unidentified                 | 0.111557457  | 0.148740419 | 0.849249996 |
| g MGYG-HGUT-03887 | g Verticillium                 | -0.023116748 | 0.765453424 | 0.982494893 |
| g MGYG-HGUT-03887 | g unclassified Tremellomycetes | -0.146590154 | 0.0571953   | 0.832568254 |
| g MGYG-HGUT-03887 | g Candida                      | -0.039825214 | 0.60718951  | 0.950933357 |
| g MGYG-HGUT-03887 | g Cladosporium                 | 0.01235069   | 0.873374679 | 0.994526835 |
| g MGYG-HGUT-03887 | g Debaromyces                  | -0.098820227 | 0.201157882 | 0.874689648 |
| g MGYG-HGUT-03887 | g Aspergillus                  | 0.03963414   | 0.608916348 | 0.951102497 |
| g MGYG-HGUT-03887 | g Kazachstania                 | -0.133042594 | 0.084637181 | 0.8415005   |
| g MGYG-HGUT-03887 | g Malassezia                   | -0.020794686 | 0.788427137 | 0.986710331 |
| g MGYG-HGUT-03887 | g unclassified Fungi           | 0.035600131  | 0.645866098 | 0.955501166 |
| g MGYG-HGUT-03887 | g Fusarium                     | -0.129797931 | 0.092574124 | 0.8415005   |
| g MGYG-HGUT-03887 | g Mycosphaerella               | -0.019869298 | 0.797634926 | 0.987463135 |
| g MGYG-HGUT-03887 | g Simplicillium                | 0.121956924  | 0.114204154 | 0.843328451 |
| g MGYG-HGUT-03887 | g unclassified Cordycipitaceae | -0.0894539   | 0.247439802 | 0.874689648 |
| g MGYG-HGUT-03887 | g unidentified                 | 0.11743948   | 0.128347838 | 0.849249996 |
| g MGYG-HGUT-03278 | g Verticillium                 | 0.005638663  | 0.941997766 | 0.996925697 |
| g MGYG-HGUT-03278 | g unclassified Tremellomycetes | -0.119281586 | 0.122425585 | 0.849176369 |
| g MGYG-HGUT-03278 | g Candida                      | 0.066719101  | 0.388757997 | 0.907127903 |
| g MGYG-HGUT-03278 | g Cladosporium                 | -0.067485544 | 0.383320066 | 0.905460587 |
| g MGYG-HGUT-03278 | g Debaromyces                  | -0.105320428 | 0.172946401 | 0.868752404 |
| g MGYG-HGUT-03278 | g Aspergillus                  | 0.0917807    | 0.235306299 | 0.874689648 |
| g MGYG-HGUT-03278 | g Kazachstania                 | 0.004997223  | 0.948586318 | 0.996925697 |
| g MGYG-HGUT-03278 | g Malassezia                   | -0.036565157 | 0.636943184 | 0.954338328 |
| g MGYG-HGUT-03278 | g unclassified Fungi           | 0.002996431  | 0.96915781  | 0.998625698 |
| g MGYG-HGUT-03278 | g Fusarium                     | -0.076103484 | 0.325396014 | 0.899370541 |
| g MGYG-HGUT-03278 | g Mycosphaerella               | -0.028919613 | 0.708967734 | 0.968657831 |
| g MGYG-HGUT-03278 | g Simplicillium                | 0.039404812  | 0.610991756 | 0.951172976 |
| g MGYG-HGUT-03278 | g unclassified Cordycipitaceae | -0.030063235 | 0.698009228 | 0.967320417 |
| g MGYG-HGUT-03278 | g unidentified                 | 0.136630868  | 0.076504982 | 0.8415005   |
| g MGYG-HGUT-03768 | g Verticillium                 | 0.11232463   | 0.145949564 | 0.849249996 |
| g MGYG-HGUT-03768 | g unclassified Tremellomycetes | 0.03770154   | 0.626502447 | 0.952865795 |
| g MGYG-HGUT-03768 | g Candida                      | -0.094104491 | 0.223611241 | 0.874689648 |
| g MGYG-HGUT-03768 | g Cladosporium                 | 0.009983293  | 0.897497866 | 0.995280411 |
| g MGYG-HGUT-03768 | g Debaromyces                  | -0.00041833  | 0.995693097 | 0.999049974 |
| g MGYG-HGUT-03768 | g Aspergillus                  | -0.00562715  | 0.942115991 | 0.996925697 |
| g MGYG-HGUT-03768 | g Kazachstania                 | -0.022325316 | 0.773261756 | 0.984510076 |
| g MGYG-HGUT-03768 | g Malassezia                   | 0.109098199  | 0.157959174 | 0.855241398 |
| g MGYG-HGUT-03768 | g unclassified Fungi           | -0.178481058 | 0.020248703 | 0.715764515 |
| g MGYG-HGUT-03768 | g Fusarium                     | -0.056423497 | 0.466220489 | 0.927602832 |
| g MGYG-HGUT-03768 | g Mycosphaerella               | -0.012536486 | 0.871486099 | 0.994526835 |
| g MGYG-HGUT-03768 | g Simplicillium                | 0.031993226  | 0.67965725  | 0.963213178 |
| g MGYG-HGUT-03768 | g unclassified Cordycipitaceae | 0.049815908  | 0.520094362 | 0.939569324 |
| g MGYG-HGUT-03768 | g unidentified                 | 0.060627211  | 0.433612479 | 0.918239588 |
| g UBA945          | g Verticillium                 | 0.010285906  | 0.894408594 | 0.995135868 |
| g UBA945          | g unclassified Tremellomycetes | -0.028476779 | 0.713227324 | 0.969963929 |
| g UBA945          | g Candida                      | -0.104337911 | 0.17701156  | 0.872371283 |
| g UBA945          | g Cladosporium                 | -0.040131524 | 0.604425769 | 0.950399198 |
| g UBA945          | g Debaromyces                  | -0.131744443 | 0.087744577 | 0.8415005   |
| g UBA945          | g Aspergillus                  | -0.00251071  | 0.97415542  | 0.998625698 |
| g UBA945          | g Kazachstania                 | -0.071441212 | 0.355995225 | 0.900151743 |
| g UBA945          | g Malassezia                   | -0.014886305 | 0.84766674  | 0.994526835 |
| g UBA945          | g unclassified Fungi           | -0.092558939 | 0.231342771 | 0.874689648 |

|                   |                                |              |             |             |
|-------------------|--------------------------------|--------------|-------------|-------------|
| g UBA945          | g Fusarium                     | -0.143513369 | 0.062677126 | 0.832568254 |
| g UBA945          | g Mycosphaerella               | -0.075145043 | 0.331543767 | 0.900151743 |
| g UBA945          | g Simplicillium                | 0.006254755  | 0.935673283 | 0.996251765 |
| g UBA945          | g unclassified Cordycipitaceae | -0.013154846 | 0.865205861 | 0.994526835 |
| g UBA945          | g unidentified                 | 0.05396769   | 0.4858772   | 0.932872225 |
| g MGYG-HGUT-04115 | g Verticillium                 | -0.025968952 | 0.737513932 | 0.976227193 |
| g MGYG-HGUT-04115 | g unclassified Tremellomycetes | 0.109665385  | 0.155795885 | 0.851524192 |
| g MGYG-HGUT-04115 | g Candida                      | -0.05300609  | 0.49369334  | 0.933554982 |
| g MGYG-HGUT-04115 | g Cladosporium                 | -0.001029603 | 0.989400014 | 0.999049974 |
| g MGYG-HGUT-04115 | g Debaromyces                  | 0.037412975  | 0.629146782 | 0.953713015 |
| g MGYG-HGUT-04115 | g Aspergillus                  | -0.059353396 | 0.443352869 | 0.920840515 |
| g MGYG-HGUT-04115 | g Kazachstania                 | -0.020541557 | 0.790942971 | 0.986710331 |
| g MGYG-HGUT-04115 | g Malassezia                   | -0.04062981  | 0.599941866 | 0.948957829 |
| g MGYG-HGUT-04115 | g unclassified Fungi           | -0.076262642 | 0.324382284 | 0.899370541 |
| g MGYG-HGUT-04115 | g Fusarium                     | -0.059814086 | 0.439815923 | 0.919791111 |
| g MGYG-HGUT-04115 | g Mycosphaerella               | 0.011832321  | 0.878647556 | 0.994526835 |
| g MGYG-HGUT-04115 | g Simplicillium                | -0.091093066 | 0.238847812 | 0.874689648 |
| g MGYG-HGUT-04115 | g unclassified Cordycipitaceae | -0.064503354 | 0.40473856  | 0.912338681 |
| g MGYG-HGUT-04115 | g unidentified                 | -0.052109601 | 0.501039876 | 0.936281889 |
| g CAG-83          | g Verticillium                 | 0.118523636  | 0.124836201 | 0.849176369 |
| g CAG-83          | g unclassified Tremellomycetes | -0.192133872 | 0.012329738 | 0.659702633 |
| g CAG-83          | g Candida                      | -0.030157081 | 0.697112688 | 0.967127531 |
| g CAG-83          | g Cladosporium                 | -0.020057483 | 0.795760147 | 0.987448974 |
| g CAG-83          | g Debaromyces                  | -0.102221786 | 0.186005822 | 0.873641816 |
| g CAG-83          | g Aspergillus                  | -0.000118768 | 0.998777226 | 0.99956432  |
| g CAG-83          | g Kazachstania                 | -0.076211609 | 0.324707109 | 0.899370541 |
| g CAG-83          | g Malassezia                   | 0.123867918  | 0.108600078 | 0.843328451 |
| g CAG-83          | g unclassified Fungi           | 0.083689534  | 0.279346583 | 0.889320764 |
| g CAG-83          | g Fusarium                     | -0.110672238 | 0.152010671 | 0.84984956  |
| g CAG-83          | g Mycosphaerella               | -0.056384243 | 0.466531203 | 0.927832911 |
| g CAG-83          | g Simplicillium                | 0.124344535  | 0.107236536 | 0.843328451 |
| g CAG-83          | g unclassified Cordycipitaceae | 0.080960525  | 0.295379007 | 0.892181547 |
| g CAG-83          | g unidentified                 | 0.176567958  | 0.021651842 | 0.742601833 |
| g Oscillibacter   | g Verticillium                 | 0.083194555  | 0.282210093 | 0.8902203   |
| g Oscillibacter   | g unclassified Tremellomycetes | -0.138983562 | 0.071524425 | 0.8415005   |
| g Oscillibacter   | g Candida                      | -0.055771525 | 0.471395922 | 0.928769554 |
| g Oscillibacter   | g Cladosporium                 | 0.010266422  | 0.894607454 | 0.995135868 |
| g Oscillibacter   | g Debaromyces                  | -0.069803455 | 0.367157433 | 0.901117392 |
| g Oscillibacter   | g Aspergillus                  | -0.037732485 | 0.62621916  | 0.952753622 |
| g Oscillibacter   | g Kazachstania                 | -0.041960403 | 0.588042109 | 0.947150582 |
| g Oscillibacter   | g Malassezia                   | 0.069705303  | 0.367833182 | 0.901117392 |
| g Oscillibacter   | g unclassified Fungi           | 0.074341861  | 0.336752567 | 0.900151743 |
| g Oscillibacter   | g Fusarium                     | -0.018450115 | 0.811810014 | 0.991049439 |
| g Oscillibacter   | g Mycosphaerella               | -0.06542674  | 0.398032076 | 0.909588897 |
| g Oscillibacter   | g Simplicillium                | 0.059283193  | 0.443893264 | 0.921010267 |
| g Oscillibacter   | g unclassified Cordycipitaceae | 0.058044732  | 0.453487505 | 0.924000823 |
| g Oscillibacter   | g unidentified                 | 0.163893266  | 0.033236176 | 0.808354944 |
| g EO              | g Verticillium                 | 0.070425149  | 0.362895046 | 0.901117392 |
| g EO              | g unclassified Tremellomycetes | -0.146044026 | 0.058138399 | 0.832568254 |
| g EO              | g Candida                      | -0.072578953 | 0.348367125 | 0.900151743 |
| g EO              | g Cladosporium                 | 0.011653174  | 0.880471103 | 0.994526835 |
| g EO              | g Debaromyces                  | -0.046603691 | 0.54738811  | 0.942564508 |
| g EO              | g Aspergillus                  | -0.02445925  | 0.75226242  | 0.980278684 |
| g EO              | g Kazachstania                 | -0.046025613 | 0.552373459 | 0.942564508 |
| g EO              | g Malassezia                   | 0.127243444  | 0.0992304   | 0.8415005   |
| g EO              | g unclassified Fungi           | 0.121724914  | 0.11489617  | 0.843328451 |
| g EO              | g Fusarium                     | -0.080600953 | 0.297536071 | 0.892181547 |
| g EO              | g Mycosphaerella               | -0.046826206 | 0.545475035 | 0.942564508 |
| g EO              | g Simplicillium                | 0.102776884  | 0.183614707 | 0.873641816 |
| g EO              | g unclassified Cordycipitaceae | 0.037201267  | 0.631089825 | 0.954051837 |
| g EO              | g unidentified                 | 0.153101588  | 0.046891271 | 0.828771778 |
| g CAG-170         | g Verticillium                 | 0.073127559  | 0.344726008 | 0.900151743 |
| g CAG-170         | g unclassified Tremellomycetes | -0.176731524 | 0.021528683 | 0.742601833 |
| g CAG-170         | g Candida                      | -0.040804253 | 0.598375651 | 0.948266952 |
| g CAG-170         | g Cladosporium                 | 0.003840224  | 0.960478935 | 0.997964903 |
| g CAG-170         | g Debaromyces                  | -0.079180289 | 0.306160412 | 0.897967316 |
| g CAG-170         | g Aspergillus                  | -0.028318142 | 0.714755412 | 0.970380158 |
| g CAG-170         | g Kazachstania                 | -0.00600817  | 0.938204138 | 0.996251765 |
| g CAG-170         | g Malassezia                   | 0.111370897  | 0.149425158 | 0.849249996 |
| g CAG-170         | g unclassified Fungi           | 0.082864306  | 0.284131549 | 0.8902203   |
| g CAG-170         | g Fusarium                     | -0.036122343 | 0.641031198 | 0.955341199 |
| g CAG-170         | g Mycosphaerella               | -0.076469144 | 0.323070045 | 0.899370541 |
| g CAG-170         | g Simplicillium                | 0.129381956  | 0.093633147 | 0.8415005   |
| g CAG-170         | g unclassified Cordycipitaceae | 0.019410027  | 0.802215226 | 0.988396129 |
| g CAG-170         | g unidentified                 | 0.184054138  | 0.016600109 | 0.702895198 |
| g CAG-103         | g Verticillium                 | 0.083878515  | 0.278258489 | 0.889320764 |
| g CAG-103         | g unclassified Tremellomycetes | -0.168692264 | 0.028346266 | 0.77775889  |
| g CAG-103         | g Candida                      | -0.016734348 | 0.829029008 | 0.993650851 |

|                  |                                |              |             |             |
|------------------|--------------------------------|--------------|-------------|-------------|
| g CAG-103        | g Cladosporium                 | 0.027185344  | 0.725699822 | 0.972631421 |
| g CAG-103        | g Debaryomyces                 | 0.031371506  | 0.685549212 | 0.963892039 |
| g CAG-103        | g Aspergillus                  | -0.070885288 | 0.359760142 | 0.900151743 |
| g CAG-103        | g Kazachstania                 | 0.006863983  | 0.929423198 | 0.996251765 |
| g CAG-103        | g Malassezia                   | 0.052330237  | 0.499226497 | 0.936281889 |
| g CAG-103        | g unclassified Fungi           | 0.082238521  | 0.287796524 | 0.891214772 |
| g CAG-103        | g Fusarium                     | -0.055317373 | 0.475019501 | 0.93028395  |
| g CAG-103        | g Mycosphaerella               | -0.000357103 | 0.996323456 | 0.999334917 |
| g CAG-103        | g Simplicillium                | 0.090924456  | 0.239721861 | 0.874689648 |
| g CAG-103        | g unclassified Cordycipitaceae | -0.032856444 | 0.671508759 | 0.96129685  |
| g CAG-103        | g unidentified                 | 0.170480868  | 0.026687994 | 0.765986149 |
| g CAG-110        | g Verticillium                 | 0.101532501  | 0.189006601 | 0.873641816 |
| g CAG-110        | g unclassified Tremellomycetes | -0.120044864 | 0.120034614 | 0.849176369 |
| g CAG-110        | g Candida                      | -0.045215677 | 0.559395287 | 0.942564508 |
| g CAG-110        | g Cladosporium                 | -0.033778464 | 0.662847283 | 0.959259869 |
| g CAG-110        | g Debaryomyces                 | -0.15994991  | 0.037772952 | 0.808354944 |
| g CAG-110        | g Aspergillus                  | -0.067795425 | 0.381134623 | 0.90490297  |
| g CAG-110        | g Kazachstania                 | -0.019035401 | 0.805953633 | 0.989083527 |
| g CAG-110        | g Malassezia                   | 0.092280076  | 0.23275757  | 0.874689648 |
| g CAG-110        | g unclassified Fungi           | 0.071049816  | 0.358643331 | 0.900151743 |
| g CAG-110        | g Fusarium                     | -0.023121758 | 0.765404067 | 0.982494893 |
| g CAG-110        | g Mycosphaerella               | -0.122414456 | 0.112842303 | 0.843328451 |
| g CAG-110        | g Simplicillium                | 0.136748446  | 0.076249591 | 0.8415005   |
| g CAG-110        | g unclassified Cordycipitaceae | 0.075940135  | 0.326438563 | 0.899370541 |
| g CAG-110        | g unidentified                 | 0.174186416  | 0.023515082 | 0.765986149 |
| g Lawsonibacter  | g Verticillium                 | 0.179998978  | 0.01919202  | 0.702895198 |
| g Lawsonibacter  | g unclassified Tremellomycetes | -0.000845623 | 0.991294043 | 0.999049974 |
| g Lawsonibacter  | g Candida                      | -0.122695819 | 0.112011141 | 0.843328451 |
| g Lawsonibacter  | g Cladosporium                 | 0.037128032  | 0.631762569 | 0.954051837 |
| g Lawsonibacter  | g Debaryomyces                 | -0.14804472  | 0.054744804 | 0.832568254 |
| g Lawsonibacter  | g Aspergillus                  | -0.061264969 | 0.42878222  | 0.918239588 |
| g Lawsonibacter  | g Kazachstania                 | 0.010621311  | 0.89098643  | 0.994653074 |
| g Lawsonibacter  | g Malassezia                   | 0.085963704  | 0.266442412 | 0.878368327 |
| g Lawsonibacter  | g unclassified Fungi           | -0.053368082 | 0.490743168 | 0.932872225 |
| g Lawsonibacter  | g Fusarium                     | -0.034190626 | 0.65898974  | 0.956966684 |
| g Lawsonibacter  | g Mycosphaerella               | 0.011620003  | 0.880808822 | 0.994526835 |
| g Lawsonibacter  | g Simplicillium                | 0.081343562  | 0.293092623 | 0.892181547 |
| g Lawsonibacter  | g unclassified Cordycipitaceae | 0.231118207  | 0.002500521 | 0.550026842 |
| g Lawsonibacter  | g unidentified                 | 0.096497179  | 0.212006236 | 0.874689648 |
| g UBA738         | g Verticillium                 | 0.062859245  | 0.416844032 | 0.91665523  |
| g UBA738         | g unclassified Tremellomycetes | -0.200804489 | 0.008849768 | 0.613926619 |
| g UBA738         | g Candida                      | -0.022764615 | 0.768924731 | 0.98374619  |
| g UBA738         | g Cladosporium                 | -0.030305549 | 0.695695204 | 0.966639149 |
| g UBA738         | g Debaryomyces                 | -0.099398128 | 0.198522616 | 0.874689648 |
| g UBA738         | g Aspergillus                  | -0.002388435 | 0.975413684 | 0.998625698 |
| g UBA738         | g Kazachstania                 | -0.08711746  | 0.260053631 | 0.878368327 |
| g UBA738         | g Malassezia                   | 0.07154948   | 0.355264874 | 0.900151743 |
| g UBA738         | g unclassified Fungi           | 0.093380825  | 0.227208227 | 0.874689648 |
| g UBA738         | g Fusarium                     | -0.042568883 | 0.582636621 | 0.944873255 |
| g UBA738         | g Mycosphaerella               | -0.049186318 | 0.525388594 | 0.939740222 |
| g UBA738         | g Simplicillium                | 0.119129921  | 0.12290504  | 0.849176369 |
| g UBA738         | g unclassified Cordycipitaceae | 0.015802279  | 0.8384178   | 0.994526835 |
| g UBA738         | g unidentified                 | 0.245280998  | 0.001307934 | 0.534709451 |
| g Intestinimonas | g Verticillium                 | 0.156512088  | 0.042143803 | 0.808354944 |
| g Intestinimonas | g unclassified Tremellomycetes | -0.150463447 | 0.050862429 | 0.832568254 |
| g Intestinimonas | g Candida                      | -0.08574614  | 0.267659034 | 0.879423876 |
| g Intestinimonas | g Cladosporium                 | 0.048254735  | 0.533272098 | 0.940891392 |
| g Intestinimonas | g Debaryomyces                 | -0.121542955 | 0.115447356 | 0.845331194 |
| g Intestinimonas | g Aspergillus                  | -0.036915209 | 0.633719271 | 0.954116909 |
| g Intestinimonas | g Kazachstania                 | -0.090969098 | 0.239490227 | 0.874689648 |
| g Intestinimonas | g Malassezia                   | 0.118946556  | 0.123486645 | 0.849176369 |
| g Intestinimonas | g unclassified Fungi           | -0.008560621 | 0.912041288 | 0.996251765 |
| g Intestinimonas | g Fusarium                     | -0.040220364 | 0.603625235 | 0.950399198 |
| g Intestinimonas | g Mycosphaerella               | -0.031263183 | 0.686577725 | 0.963892039 |
| g Intestinimonas | g Simplicillium                | 0.115272767  | 0.135593362 | 0.849249996 |
| g Intestinimonas | g unclassified Cordycipitaceae | 0.112485049  | 0.14537104  | 0.849249996 |
| g Intestinimonas | g unidentified                 | 0.114891212  | 0.136901086 | 0.849249996 |
| g Flavonifractor | g Verticillium                 | 0.116441909  | 0.131645792 | 0.849249996 |
| g Flavonifractor | g unclassified Tremellomycetes | 0.091457345  | 0.236967057 | 0.874689648 |
| g Flavonifractor | g Candida                      | 0.009445717  | 0.902989549 | 0.995280411 |
| g Flavonifractor | g Cladosporium                 | -0.050564379 | 0.513836126 | 0.938277062 |
| g Flavonifractor | g Debaryomyces                 | 0.05103235   | 0.50994307  | 0.937011504 |
| g Flavonifractor | g Aspergillus                  | -0.078273817 | 0.311748246 | 0.897967316 |
| g Flavonifractor | g Kazachstania                 | 0.005920848  | 0.939100524 | 0.996633988 |
| g Flavonifractor | g Malassezia                   | 0.011350595  | 0.883552486 | 0.994526835 |
| g Flavonifractor | g unclassified Fungi           | -0.130444015 | 0.09094819  | 0.8415005   |
| g Flavonifractor | g Fusarium                     | 0.016575304  | 0.830629397 | 0.994526835 |
| g Flavonifractor | g Mycosphaerella               | 0.05383605   | 0.486943274 | 0.932872225 |



|                       |                                |              |             |             |
|-----------------------|--------------------------------|--------------|-------------|-------------|
| g Flavonifactor       | g Simplicillium                | 0.015802096  | 0.83841965  | 0.994526835 |
| g Flavonifactor       | g unclassified Cordycipitaceae | 0.096486305  | 0.212057982 | 0.874689648 |
| g Flavonifactor       | g unidentified                 | -0.065166025 | 0.399918871 | 0.910058571 |
| g UBA1777             | g Verticillium                 | 0.023351948  | 0.763137429 | 0.982076388 |
| g UBA1777             | g unclassified Tremellomycetes | -0.149305951 | 0.052690863 | 0.832568254 |
| g UBA1777             | g Candida                      | -0.058285674 | 0.451611912 | 0.923868417 |
| g UBA1777             | g Cladosporium                 | 0.01290693   | 0.867722772 | 0.994526835 |
| g UBA1777             | g Debaromyces                  | -0.097015469 | 0.209550307 | 0.874689648 |
| g UBA1777             | g Aspergillus                  | -0.043980577 | 0.570185053 | 0.942564508 |
| g UBA1777             | g Kazachstania                 | -0.042292636 | 0.585087839 | 0.945928844 |
| g UBA1777             | g Malassezia                   | 0.110660549  | 0.152054213 | 0.84984956  |
| g UBA1777             | g unclassified Fungi           | 0.08253266   | 0.286069952 | 0.891214772 |
| g UBA1777             | g Fusarium                     | -0.069339172 | 0.370360675 | 0.901117392 |
| g UBA1777             | g Mycosphaerella               | -0.042788634 | 0.580690108 | 0.944873255 |
| g UBA1777             | g Simplicillium                | 0.101873972  | 0.18751563  | 0.873641816 |
| g UBA1777             | g unclassified Cordycipitaceae | 0.010808565  | 0.889076728 | 0.994639994 |
| g UBA1777             | g unidentified                 | 0.193139732  | 0.011872315 | 0.659702633 |
| g Ruminiclostridium C | g Verticillium                 | 0.075162877  | 0.331428702 | 0.900151743 |
| g Ruminiclostridium C | g unclassified Tremellomycetes | -0.092748553 | 0.230384241 | 0.874689648 |
| g Ruminiclostridium C | g Candida                      | -0.100261488 | 0.194632383 | 0.874689648 |
| g Ruminiclostridium C | g Cladosporium                 | -0.026436698 | 0.732963531 | 0.973693103 |
| g Ruminiclostridium C | g Debaromyces                  | -0.020844442 | 0.787932873 | 0.986710331 |
| g Ruminiclostridium C | g Aspergillus                  | 0.008105318  | 0.91670208  | 0.996251765 |
| g Ruminiclostridium C | g Kazachstania                 | -0.053717739 | 0.487902461 | 0.932872225 |
| g Ruminiclostridium C | g Malassezia                   | 0.083016371  | 0.283245715 | 0.8902203   |
| g Ruminiclostridium C | g unclassified Fungi           | -4.88E-05    | 0.999497372 | 0.999714089 |
| g Ruminiclostridium C | g Fusarium                     | -0.020937031 | 0.787013339 | 0.986710331 |
| g Ruminiclostridium C | g Mycosphaerella               | -0.049883381 | 0.519528607 | 0.939250598 |
| g Ruminiclostridium C | g Simplicillium                | 0.20044017   | 0.0089763   | 0.613926619 |
| g Ruminiclostridium C | g unclassified Cordycipitaceae | 0.103351169  | 0.181164769 | 0.872371283 |
| g Ruminiclostridium C | g unidentified                 | 0.101592217  | 0.18874524  | 0.873641816 |
| g F23-B02             | g Verticillium                 | 0.118597931  | 0.124598299 | 0.849176369 |
| g F23-B02             | g unclassified Tremellomycetes | -0.209076376 | 0.006371235 | 0.613926619 |
| g F23-B02             | g Candida                      | -0.033140875 | 0.668832133 | 0.960428856 |
| g F23-B02             | g Cladosporium                 | 0.032509801  | 0.674776426 | 0.961701261 |
| g F23-B02             | g Debaromyces                  | -0.036034649 | 0.641842071 | 0.955341199 |
| g F23-B02             | g Aspergillus                  | -0.048287191 | 0.532996451 | 0.940891392 |
| g F23-B02             | g Kazachstania                 | -0.07468077  | 0.334548343 | 0.900151743 |
| g F23-B02             | g Malassezia                   | 0.1035641    | 0.180262531 | 0.872371283 |
| g F23-B02             | g unclassified Fungi           | 0.030485472  | 0.693978807 | 0.966086731 |
| g F23-B02             | g Fusarium                     | -0.091525786 | 0.236614857 | 0.874689648 |
| g F23-B02             | g Mycosphaerella               | -0.081964429 | 0.289411679 | 0.891214772 |
| g F23-B02             | g Simplicillium                | 0.112081449  | 0.146829884 | 0.849249996 |
| g F23-B02             | g unclassified Cordycipitaceae | 0.069632024  | 0.368338196 | 0.901117392 |
| g F23-B02             | g unidentified                 | 0.151099758  | 0.04987992  | 0.832568254 |
| g MGYG-HGUT-02726     | g Verticillium                 | 0.141353136  | 0.06677757  | 0.836350979 |
| g MGYG-HGUT-02726     | g unclassified Tremellomycetes | 0.031447331  | 0.684829601 | 0.963892039 |
| g MGYG-HGUT-02726     | g Candida                      | -0.046930265 | 0.544581512 | 0.942564508 |
| g MGYG-HGUT-02726     | g Cladosporium                 | 0.009746919  | 0.899911997 | 0.995280411 |
| g MGYG-HGUT-02726     | g Debaromyces                  | -0.154269031 | 0.045218318 | 0.825673201 |
| g MGYG-HGUT-02726     | g Aspergillus                  | -0.078956991 | 0.307530757 | 0.897967316 |
| g MGYG-HGUT-02726     | g Kazachstania                 | -0.016849599 | 0.827869728 | 0.993650851 |
| g MGYG-HGUT-02726     | g Malassezia                   | 0.070777761  | 0.360491205 | 0.900151743 |
| g MGYG-HGUT-02726     | g unclassified Fungi           | -0.073344025 | 0.343295961 | 0.900151743 |
| g MGYG-HGUT-02726     | g Fusarium                     | -0.097752907 | 0.206091238 | 0.874689648 |
| g MGYG-HGUT-02726     | g Mycosphaerella               | 0.043697494  | 0.57267183  | 0.942985175 |
| g MGYG-HGUT-02726     | g Simplicillium                | 0.041320956  | 0.593747323 | 0.947273049 |
| g MGYG-HGUT-02726     | g unclassified Cordycipitaceae | 0.078462397  | 0.310580312 | 0.897967316 |
| g MGYG-HGUT-02726     | g unidentified                 | 0.109873907  | 0.155006193 | 0.850740641 |
| g MGYG-HGUT-01104     | g Verticillium                 | 0.083880241  | 0.278248562 | 0.889320764 |
| g MGYG-HGUT-01104     | g unclassified Tremellomycetes | -0.009751637 | 0.899863793 | 0.995280411 |
| g MGYG-HGUT-01104     | g Candida                      | -0.101187212 | 0.190523039 | 0.874689648 |
| g MGYG-HGUT-01104     | g Cladosporium                 | 0.037138     | 0.631670981 | 0.954051837 |
| g MGYG-HGUT-01104     | g Debaromyces                  | -0.172393154 | 0.025007588 | 0.765986149 |
| g MGYG-HGUT-01104     | g Aspergillus                  | -0.048107836 | 0.534520623 | 0.940943954 |
| g MGYG-HGUT-01104     | g Kazachstania                 | 0.00021978   | 0.997737259 | 0.999334917 |
| g MGYG-HGUT-01104     | g Malassezia                   | -0.048359326 | 0.532384057 | 0.940412658 |
| g MGYG-HGUT-01104     | g unclassified Fungi           | -0.022530899 | 0.771231237 | 0.984282666 |
| g MGYG-HGUT-01104     | g Fusarium                     | -0.075661072 | 0.328224599 | 0.899370541 |
| g MGYG-HGUT-01104     | g Mycosphaerella               | -0.012655247 | 0.870279296 | 0.994526835 |
| g MGYG-HGUT-01104     | g Simplicillium                | 0.06950297   | 0.369228622 | 0.901117392 |
| g MGYG-HGUT-01104     | g unclassified Cordycipitaceae | 0.029045135  | 0.707761979 | 0.968527443 |
| g MGYG-HGUT-01104     | g unidentified                 | 0.095725247  | 0.215702146 | 0.874689648 |
| g NK3B98              | g Verticillium                 | 0.080773781  | 0.296497981 | 0.892181547 |
| g NK3B98              | g unclassified Tremellomycetes | -0.165945729 | 0.03106362  | 0.793886316 |
| g NK3B98              | g Candida                      | -0.056548946 | 0.465228261 | 0.927602832 |
| g NK3B98              | g Cladosporium                 | -0.01467538  | 0.849799527 | 0.994526835 |
| g NK3B98              | g Debaromyces                  | -0.062712263 | 0.417936458 | 0.916661525 |

|                       |                                |              |             |             |
|-----------------------|--------------------------------|--------------|-------------|-------------|
| g NK3B98              | g Aspergillus                  | 0.039463707  | 0.610458465 | 0.951172976 |
| g NK3B98              | g Kazachstania                 | -0.020455618 | 0.791797605 | 0.986710331 |
| g NK3B98              | g Malassezia                   | 0.033723526  | 0.663362135 | 0.959259869 |
| g NK3B98              | g unclassified_Fungi           | 0.050353337  | 0.51559678  | 0.938796978 |
| g NK3B98              | g Fusarium                     | -0.041913527 | 0.588459488 | 0.947252808 |
| g NK3B98              | g Mycosphaerella               | -0.004768407 | 0.950937469 | 0.99717368  |
| g NK3B98              | g Simplicillium                | 0.051526045  | 0.50585265  | 0.936546622 |
| g NK3B98              | g unclassified_Cordycipitaceae | 0.030887041  | 0.690153616 | 0.96434561  |
| g NK3B98              | g unidentified                 | 0.171159281  | 0.026081104 | 0.765986149 |
| g MGYG-HGUT-03980     | g Verticillium                 | 0.110809585  | 0.151499747 | 0.84984956  |
| g MGYG-HGUT-03980     | g unclassified_Tremellomycetes | -0.129672785 | 0.092891722 | 0.8415005   |
| g MGYG-HGUT-03980     | g Candida                      | -0.035365508 | 0.648043202 | 0.955501166 |
| g MGYG-HGUT-03980     | g Cladosporium                 | -0.012261867 | 0.874277802 | 0.994526835 |
| g MGYG-HGUT-03980     | g Debaryomyces                 | -0.029682053 | 0.701655025 | 0.967505184 |
| g MGYG-HGUT-03980     | g Aspergillus                  | -0.031364873 | 0.68561217  | 0.963892039 |
| g MGYG-HGUT-03980     | g Kazachstania                 | 0.004418784  | 0.954530753 | 0.99717368  |
| g MGYG-HGUT-03980     | g Malassezia                   | 0.099462692  | 0.198229762 | 0.874689648 |
| g MGYG-HGUT-03980     | g unclassified_Fungi           | 0.008176391  | 0.915974337 | 0.996251765 |
| g MGYG-HGUT-03980     | g Fusarium                     | -0.003285789 | 0.966181146 | 0.998625698 |
| g MGYG-HGUT-03980     | g Mycosphaerella               | -0.049223596 | 0.525074368 | 0.939740222 |
| g MGYG-HGUT-03980     | g Simplicillium                | 0.15537053   | 0.043685873 | 0.815882315 |
| g MGYG-HGUT-03980     | g unclassified_Cordycipitaceae | 0.083211157  | 0.282113728 | 0.8902203   |
| g MGYG-HGUT-03980     | g unidentified                 | 0.130090596  | 0.09183476  | 0.8415005   |
| g MGYG-HGUT-02776     | g Verticillium                 | 0.014809778  | 0.848440423 | 0.994526835 |
| g MGYG-HGUT-02776     | g unclassified_Tremellomycetes | -0.132230771 | 0.086569934 | 0.8415005   |
| g MGYG-HGUT-02776     | g Candida                      | -0.04466096  | 0.56422911  | 0.942564508 |
| g MGYG-HGUT-02776     | g Cladosporium                 | -0.116412164 | 0.13174512  | 0.849249996 |
| g MGYG-HGUT-02776     | g Debaryomyces                 | -0.049835991 | 0.519925938 | 0.939488064 |
| g MGYG-HGUT-02776     | g Aspergillus                  | -0.001006622 | 0.98963659  | 0.999049974 |
| g MGYG-HGUT-02776     | g Kazachstania                 | 0.034806918  | 0.653238449 | 0.956176095 |
| g MGYG-HGUT-02776     | g Malassezia                   | -0.05678136  | 0.463393077 | 0.927602832 |
| g MGYG-HGUT-02776     | g unclassified_Fungi           | -0.019521704 | 0.801100852 | 0.987963703 |
| g MGYG-HGUT-02776     | g Fusarium                     | -0.128912274 | 0.094840451 | 0.8415005   |
| g MGYG-HGUT-02776     | g Mycosphaerella               | -0.027055162 | 0.726961176 | 0.972631421 |
| g MGYG-HGUT-02776     | g Simplicillium                | 0.069155684  | 0.37163135  | 0.901117392 |
| g MGYG-HGUT-02776     | g unclassified_Cordycipitaceae | 0.012969498  | 0.867087447 | 0.994526835 |
| g MGYG-HGUT-02776     | g unidentified                 | 0.145247415  | 0.059536978 | 0.832568254 |
| g Pseudoflavonifactor | g Verticillium                 | 0.127009076  | 0.099859582 | 0.8415005   |
| g Pseudoflavonifactor | g unclassified_Tremellomycetes | 0.034744251  | 0.653822334 | 0.956331535 |
| g Pseudoflavonifactor | g Candida                      | -0.021102149 | 0.785374234 | 0.986710331 |
| g Pseudoflavonifactor | g Cladosporium                 | 0.062086904  | 0.42260301  | 0.917612466 |
| g Pseudoflavonifactor | g Debaryomyces                 | -0.105243827 | 0.173260831 | 0.868752404 |
| g Pseudoflavonifactor | g Aspergillus                  | -0.088419433 | 0.252971253 | 0.874689648 |
| g Pseudoflavonifactor | g Kazachstania                 | -0.100044672 | 0.195604086 | 0.874689648 |
| g Pseudoflavonifactor | g Malassezia                   | 0.044039738  | 0.569665999 | 0.942564508 |
| g Pseudoflavonifactor | g unclassified_Fungi           | -0.012693145 | 0.869894245 | 0.994526835 |
| g Pseudoflavonifactor | g Fusarium                     | -0.05584854  | 0.470782938 | 0.928769554 |
| g Pseudoflavonifactor | g Mycosphaerella               | 0.070788991  | 0.360414813 | 0.900151743 |
| g Pseudoflavonifactor | g Simplicillium                | 0.09235853   | 0.23235892  | 0.874689648 |
| g Pseudoflavonifactor | g unclassified_Cordycipitaceae | 0.179826327  | 0.019309751 | 0.702895198 |
| g Pseudoflavonifactor | g unidentified                 | 0.064561252  | 0.404316088 | 0.912338681 |
| g UBA5446             | g Verticillium                 | 0.068975448  | 0.372882105 | 0.901117392 |
| g UBA5446             | g unclassified_Tremellomycetes | -0.056092099 | 0.468847247 | 0.928769554 |
| g UBA5446             | g Candida                      | -0.049895792 | 0.519424572 | 0.939250598 |
| g UBA5446             | g Cladosporium                 | 0.03215039   | 0.678170882 | 0.962963695 |
| g UBA5446             | g Debaryomyces                 | -0.105375688 | 0.172719835 | 0.868752404 |
| g UBA5446             | g Aspergillus                  | -0.001212598 | 0.987516177 | 0.999049974 |
| g UBA5446             | g Kazachstania                 | -0.06397417  | 0.408611978 | 0.913116876 |
| g UBA5446             | g Malassezia                   | 0.060715513  | 0.432941845 | 0.918239588 |
| g UBA5446             | g unclassified_Fungi           | 0.063753378  | 0.410234538 | 0.913116876 |
| g UBA5446             | g Fusarium                     | -0.021115149 | 0.785245223 | 0.986710331 |
| g UBA5446             | g Mycosphaerella               | 0.005542294  | 0.942987382 | 0.996925697 |
| g UBA5446             | g Simplicillium                | 0.049418992  | 0.523428862 | 0.939740222 |
| g UBA5446             | g unclassified_Cordycipitaceae | 0.038942332  | 0.615186595 | 0.951817018 |
| g UBA5446             | g unidentified                 | 0.162738881  | 0.03451377  | 0.808354944 |
| g MGYG-HGUT-02213     | g Verticillium                 | 0.08336097   | 0.281245169 | 0.8902203   |
| g MGYG-HGUT-02213     | g unclassified_Tremellomycetes | -0.123028419 | 0.111034802 | 0.843328451 |
| g MGYG-HGUT-02213     | g Candida                      | -0.103962249 | 0.178584363 | 0.872371283 |
| g MGYG-HGUT-02213     | g Cladosporium                 | 0.012595325  | 0.870888156 | 0.994526835 |
| g MGYG-HGUT-02213     | g Debaryomyces                 | -0.058572715 | 0.449383158 | 0.922032734 |
| g MGYG-HGUT-02213     | g Aspergillus                  | -0.053152479 | 0.492499165 | 0.933370788 |
| g MGYG-HGUT-02213     | g Kazachstania                 | -0.05110343  | 0.509353091 | 0.937011504 |
| g MGYG-HGUT-02213     | g Malassezia                   | 0.113359405  | 0.142248369 | 0.849249996 |
| g MGYG-HGUT-02213     | g unclassified_Fungi           | 0.033183162  | 0.66843454  | 0.960389755 |
| g MGYG-HGUT-02213     | g Fusarium                     | -0.069252575 | 0.370960034 | 0.901117392 |
| g MGYG-HGUT-02213     | g Mycosphaerella               | -0.031429871 | 0.684995275 | 0.963892039 |
| g MGYG-HGUT-02213     | g Simplicillium                | 0.070966624  | 0.359207765 | 0.900151743 |
| g MGYG-HGUT-02213     | g unclassified_Cordycipitaceae | 0.078709466  | 0.309054479 | 0.897967316 |

|                   |                                |              |             |             |
|-------------------|--------------------------------|--------------|-------------|-------------|
| g MGYG-HGUT-02213 | g unidentified                 | 0.086279636  | 0.26468243  | 0.878368327 |
| g UBA9475         | g Verticillium                 | 0.110364894  | 0.153158683 | 0.85006873  |
| g UBA9475         | g unclassified Tremellomycetes | -0.065412402 | 0.398135702 | 0.909588897 |
| g UBA9475         | g Candida                      | -0.085028458 | 0.271699141 | 0.883774313 |
| g UBA9475         | g Cladosporium                 | -0.01816908  | 0.814624474 | 0.991258955 |
| g UBA9475         | g Debaromyces                  | -0.088577837 | 0.252118754 | 0.874689648 |
| g UBA9475         | g Aspergillus                  | -0.081986965 | 0.289278651 | 0.891214772 |
| g UBA9475         | g Kazachstania                 | -0.109493159 | 0.156450397 | 0.852150641 |
| g UBA9475         | g Malassezia                   | 0.031374721  | 0.685518688 | 0.963892039 |
| g UBA9475         | g unclassified Fungi           | -0.03462755  | 0.654910245 | 0.956614192 |
| g UBA9475         | g Fusarium                     | -0.038692311 | 0.617459585 | 0.952309753 |
| g UBA9475         | g Mycosphaerella               | -0.018158122 | 0.814734265 | 0.991261813 |
| g UBA9475         | g Simplicillium                | 0.08207802   | 0.288741582 | 0.891214772 |
| g UBA9475         | g unclassified Cordycipitaceae | 0.054703206  | 0.479943816 | 0.932202453 |
| g UBA9475         | g unidentified                 | 0.099904977  | 0.196232019 | 0.874689648 |
| g MGYG-HGUT-01226 | g Verticillium                 | -0.01481254  | 0.848412502 | 0.994526835 |
| g MGYG-HGUT-01226 | g unclassified Tremellomycetes | -0.137539874 | 0.074548415 | 0.8415005   |
| g MGYG-HGUT-01226 | g Candida                      | 0.026935503  | 0.728121213 | 0.973007866 |
| g MGYG-HGUT-01226 | g Cladosporium                 | -0.022420895 | 0.772317543 | 0.984510076 |
| g MGYG-HGUT-01226 | g Debaromyces                  | 0.014458399  | 0.851994688 | 0.994526835 |
| g MGYG-HGUT-01226 | g Aspergillus                  | 0.057961208  | 0.454138701 | 0.924307006 |
| g MGYG-HGUT-01226 | g Kazachstania                 | 0.051932134  | 0.502500955 | 0.936281889 |
| g MGYG-HGUT-01226 | g Malassezia                   | 0.043407091  | 0.575228196 | 0.943352947 |
| g MGYG-HGUT-01226 | g unclassified Fungi           | 0.070362791  | 0.363321187 | 0.901117392 |
| g MGYG-HGUT-01226 | g Fusarium                     | -0.023013535 | 0.766470407 | 0.982494893 |
| g MGYG-HGUT-01226 | g Mycosphaerella               | -0.149338207 | 0.052639181 | 0.832568254 |
| g MGYG-HGUT-01226 | g Simplicillium                | 0.057668266  | 0.456426764 | 0.924332119 |
| g MGYG-HGUT-01226 | g unclassified Cordycipitaceae | -0.016286479 | 0.833537493 | 0.994526835 |
| g MGYG-HGUT-01226 | g unidentified                 | 0.125333382  | 0.104450454 | 0.841929371 |
| g MGYG-HGUT-03297 | g Verticillium                 | 0.038404937  | 0.620076642 | 0.952309753 |
| g MGYG-HGUT-03297 | g unclassified Tremellomycetes | -0.112046992 | 0.146954947 | 0.849249996 |
| g MGYG-HGUT-03297 | g Candida                      | -0.021434423 | 0.782078634 | 0.986171666 |
| g MGYG-HGUT-03297 | g Cladosporium                 | 0.020577793  | 0.790582694 | 0.986710331 |
| g MGYG-HGUT-03297 | g Debaromyces                  | -0.051645316 | 0.504867032 | 0.936546622 |
| g MGYG-HGUT-03297 | g Aspergillus                  | -0.036067973 | 0.641533886 | 0.955341199 |
| g MGYG-HGUT-03297 | g Kazachstania                 | -0.116572657 | 0.131209872 | 0.849249996 |
| g MGYG-HGUT-03297 | g Malassezia                   | 0.133603161  | 0.083322913 | 0.8415005   |
| g MGYG-HGUT-03297 | g unclassified Fungi           | 0.001111393  | 0.988558019 | 0.999049974 |
| g MGYG-HGUT-03297 | g Fusarium                     | -0.069994612 | 0.365843563 | 0.901117392 |
| g MGYG-HGUT-03297 | g Mycosphaerella               | -0.008951106 | 0.908046397 | 0.996251765 |
| g MGYG-HGUT-03297 | g Simplicillium                | 0.054277523  | 0.483373006 | 0.932872225 |
| g MGYG-HGUT-03297 | g unclassified Cordycipitaceae | 0.012323324  | 0.873652911 | 0.994526835 |
| g MGYG-HGUT-03297 | g unidentified                 | 0.062680549  | 0.418172385 | 0.916661525 |
| g MGYG-HGUT-02840 | g Verticillium                 | 0.112091668  | 0.146792811 | 0.849249996 |
| g MGYG-HGUT-02840 | g unclassified Tremellomycetes | -0.031548238 | 0.683872391 | 0.963892039 |
| g MGYG-HGUT-02840 | g Candida                      | -0.032825206 | 0.671802976 | 0.96129685  |
| g MGYG-HGUT-02840 | g Cladosporium                 | 0.066694591  | 0.388932662 | 0.907127903 |
| g MGYG-HGUT-02840 | g Debaromyces                  | -0.082514166 | 0.286178301 | 0.891214772 |
| g MGYG-HGUT-02840 | g Aspergillus                  | -0.125819713 | 0.103101274 | 0.841929371 |
| g MGYG-HGUT-02840 | g Kazachstania                 | -0.089604072 | 0.24664384  | 0.874689648 |
| g MGYG-HGUT-02840 | g Malassezia                   | 0.093524377  | 0.226491469 | 0.874689648 |
| g MGYG-HGUT-02840 | g unclassified Fungi           | -0.080964107 | 0.295357572 | 0.892181547 |
| g MGYG-HGUT-02840 | g Fusarium                     | -0.019237362 | 0.80393896  | 0.988720167 |
| g MGYG-HGUT-02840 | g Mycosphaerella               | -0.046901099 | 0.544831874 | 0.942564508 |
| g MGYG-HGUT-02840 | g Simplicillium                | 0.106665572  | 0.167493613 | 0.864987015 |
| g MGYG-HGUT-02840 | g unclassified Cordycipitaceae | 0.080770045  | 0.296520394 | 0.892181547 |
| g MGYG-HGUT-02840 | g unidentified                 | 0.110890743  | 0.151198452 | 0.84984956  |
| g MGYG-HGUT-04580 | g Verticillium                 | 0.019875     | 0.797578103 | 0.987463135 |
| g MGYG-HGUT-04580 | g unclassified Tremellomycetes | -0.060159866 | 0.437171775 | 0.919176572 |
| g MGYG-HGUT-04580 | g Candida                      | -0.134359227 | 0.081576293 | 0.8415005   |
| g MGYG-HGUT-04580 | g Cladosporium                 | 0.052573551  | 0.497230752 | 0.935069491 |
| g MGYG-HGUT-04580 | g Debaromyces                  | -0.050048355 | 0.518146629 | 0.939250598 |
| g MGYG-HGUT-04580 | g Aspergillus                  | 0.004474231  | 0.953960827 | 0.99717368  |
| g MGYG-HGUT-04580 | g Kazachstania                 | 0.003690709  | 0.96201647  | 0.998263857 |
| g MGYG-HGUT-04580 | g Malassezia                   | 0.130835067  | 0.08997518  | 0.8415005   |
| g MGYG-HGUT-04580 | g unclassified Fungi           | 0.067536808  | 0.382958005 | 0.905460587 |
| g MGYG-HGUT-04580 | g Fusarium                     | -0.043908762 | 0.57081544  | 0.942564508 |
| g MGYG-HGUT-04580 | g Mycosphaerella               | -0.017041483 | 0.825940433 | 0.993650851 |
| g MGYG-HGUT-04580 | g Simplicillium                | 0.017358126  | 0.822759046 | 0.992484281 |
| g MGYG-HGUT-04580 | g unclassified Cordycipitaceae | 0.020102965  | 0.795307205 | 0.987176079 |
| g MGYG-HGUT-04580 | g unidentified                 | 0.122480171  | 0.112647746 | 0.843328451 |
| g MGYG-HGUT-02696 | g Verticillium                 | 0.107603199  | 0.163769167 | 0.860931247 |
| g MGYG-HGUT-02696 | g unclassified Tremellomycetes | 0.009182172  | 0.905683531 | 0.995690688 |
| g MGYG-HGUT-02696 | g Candida                      | 0.021352142  | 0.782894364 | 0.986399684 |
| g MGYG-HGUT-02696 | g Cladosporium                 | 0.074912962  | 0.333043531 | 0.900151743 |
| g MGYG-HGUT-02696 | g Debaromyces                  | -0.091392263 | 0.237302307 | 0.874689648 |
| g MGYG-HGUT-02696 | g Aspergillus                  | -0.08803946  | 0.2550243   | 0.874689648 |
| g MGYG-HGUT-02696 | g Kazachstania                 | -0.119212975 | 0.122642303 | 0.849176369 |

|                   |                                |              |             |             |
|-------------------|--------------------------------|--------------|-------------|-------------|
| g MGYG-HGUT-02696 | g Malassezia                   | 0.072037303  | 0.351985747 | 0.900151743 |
| g MGYG-HGUT-02696 | g unclassified Fungi           | -0.023948938 | 0.75726837  | 0.981293944 |
| g MGYG-HGUT-02696 | g Fusarium                     | -0.047262137 | 0.541736666 | 0.94160936  |
| g MGYG-HGUT-02696 | g Mycosphaerella               | -0.026591945 | 0.731455276 | 0.973693103 |
| g MGYG-HGUT-02696 | g Simplicillium                | 0.035530049  | 0.646516083 | 0.955501166 |
| g MGYG-HGUT-02696 | g unclassified Cordycipitaceae | 0.192203567  | 0.012297552 | 0.659702633 |
| g MGYG-HGUT-02696 | g unidentified                 | 0.068737604  | 0.374536589 | 0.902314617 |
| g MGYG-HGUT-02067 | g Verticillium                 | 0.077732968  | 0.31511378  | 0.98525398  |
| g MGYG-HGUT-02067 | g unclassified Tremellomycetes | -0.0452238   | 0.559324657 | 0.942564508 |
| g MGYG-HGUT-02067 | g Candida                      | -0.113224533 | 0.142726693 | 0.849249996 |
| g MGYG-HGUT-02067 | g Cladosporium                 | -0.048123549 | 0.534387005 | 0.940891392 |
| g MGYG-HGUT-02067 | g Debaromyces                  | -0.104601969 | 0.175912156 | 0.871837921 |
| g MGYG-HGUT-02067 | g Aspergillus                  | -0.082439604 | 0.286615431 | 0.891214772 |
| g MGYG-HGUT-02067 | g Kazachstania                 | 0.022195603  | 0.774543718 | 0.984510076 |
| g MGYG-HGUT-02067 | g Malassezia                   | 0.046497584  | 0.548301524 | 0.942564508 |
| g MGYG-HGUT-02067 | g unclassified Fungi           | -0.032966026 | 0.670477049 | 0.96129685  |
| g MGYG-HGUT-02067 | g Fusarium                     | -0.103132463 | 0.182094934 | 0.872371283 |
| g MGYG-HGUT-02067 | g Mycosphaerella               | -0.033090038 | 0.669310229 | 0.960649684 |
| g MGYG-HGUT-02067 | g Simplicillium                | 0.018492723  | 0.811383519 | 0.991049439 |
| g MGYG-HGUT-02067 | g unclassified Cordycipitaceae | 0.040395519  | 0.60204831  | 0.949974496 |
| g MGYG-HGUT-02067 | g unidentified                 | 0.083071216  | 0.282926678 | 0.8902203   |
| g MGYG-HGUT-02727 | g Verticillium                 | 0.127693772  | 0.098030255 | 0.8415005   |
| g MGYG-HGUT-02727 | g unclassified Tremellomycetes | -0.112516931 | 0.145256271 | 0.849249996 |
| g MGYG-HGUT-02727 | g Candida                      | -0.046510375 | 0.548191369 | 0.942564508 |
| g MGYG-HGUT-02727 | g Cladosporium                 | -0.021706947 | 0.779378557 | 0.985246269 |
| g MGYG-HGUT-02727 | g Debaromyces                  | -0.080420493 | 0.298622567 | 0.892181547 |
| g MGYG-HGUT-02727 | g Aspergillus                  | -0.030151542 | 0.697165601 | 0.967127531 |
| g MGYG-HGUT-02727 | g Kazachstania                 | -0.118454677 | 0.125057329 | 0.849176369 |
| g MGYG-HGUT-02727 | g Malassezia                   | 0.152516509  | 0.047748915 | 0.832568254 |
| g MGYG-HGUT-02727 | g unclassified Fungi           | -0.019766871 | 0.798655833 | 0.987463135 |
| g MGYG-HGUT-02727 | g Fusarium                     | -0.018744153 | 0.808867912 | 0.989645702 |
| g MGYG-HGUT-02727 | g Mycosphaerella               | -0.021887069 | 0.777595407 | 0.984728744 |
| g MGYG-HGUT-02727 | g Simplicillium                | 0.036624264  | 0.636398342 | 0.954338328 |
| g MGYG-HGUT-02727 | g unclassified Cordycipitaceae | 0.145295664  | 0.059451488 | 0.832568254 |
| g MGYG-HGUT-02727 | g unidentified                 | 0.127027844  | 0.09980908  | 0.8415005   |
| g Marseille-P3106 | g Verticillium                 | 0.117332629  | 0.128698014 | 0.849249996 |
| g Marseille-P3106 | g unclassified Tremellomycetes | 0.008476852  | 0.912898578 | 0.996251765 |
| g Marseille-P3106 | g Candida                      | -0.093128157 | 0.228473694 | 0.874689648 |
| g Marseille-P3106 | g Cladosporium                 | -0.01999815  | 0.796351122 | 0.987463135 |
| g Marseille-P3106 | g Debaromyces                  | -0.073816832 | 0.340185516 | 0.900151743 |
| g Marseille-P3106 | g Aspergillus                  | -0.059859565 | 0.439467634 | 0.91979111  |
| g Marseille-P3106 | g Kazachstania                 | -0.149365146 | 0.052596053 | 0.832568254 |
| g Marseille-P3106 | g Malassezia                   | 0.082028361  | 0.289034404 | 0.891214772 |
| g Marseille-P3106 | g unclassified Fungi           | -0.0612187   | 0.429131608 | 0.918239588 |
| g Marseille-P3106 | g Fusarium                     | 0.029489688  | 0.703497482 | 0.967508066 |
| g Marseille-P3106 | g Mycosphaerella               | 0.082063405  | 0.288827737 | 0.891214772 |
| g Marseille-P3106 | g Simplicillium                | 0.170791846  | 0.026408317 | 0.765986149 |
| g Marseille-P3106 | g unclassified Cordycipitaceae | 0.209424849  | 0.006281983 | 0.613926619 |
| g Marseille-P3106 | g unidentified                 | 0.055163994  | 0.476246698 | 0.930780596 |
| g MGYG-HGUT-01286 | g Verticillium                 | 0.085436283  | 0.269398286 | 0.880885289 |
| g MGYG-HGUT-01286 | g unclassified Tremellomycetes | 0.010920044  | 0.887940109 | 0.994526835 |
| g MGYG-HGUT-01286 | g Candida                      | -0.018911112 | 0.807198529 | 0.989255135 |
| g MGYG-HGUT-01286 | g Cladosporium                 | 0.036946956  | 0.633427221 | 0.954116909 |
| g MGYG-HGUT-01286 | g Debaromyces                  | -0.090390499 | 0.242504549 | 0.874689648 |
| g MGYG-HGUT-01286 | g Aspergillus                  | 0.001903923  | 0.980400077 | 0.998625698 |
| g MGYG-HGUT-01286 | g Kazachstania                 | 0.141690431  | 0.066123278 | 0.836350979 |
| g MGYG-HGUT-01286 | g Malassezia                   | -0.029088132 | 0.707349118 | 0.96831002  |
| g MGYG-HGUT-01286 | g unclassified Fungi           | -0.017880815 | 0.817513803 | 0.991841934 |
| g MGYG-HGUT-01286 | g Fusarium                     | -0.095560281 | 0.216497912 | 0.874689648 |
| g MGYG-HGUT-01286 | g Mycosphaerella               | 0.089801853  | 0.245598248 | 0.874689648 |
| g MGYG-HGUT-01286 | g Simplicillium                | 0.04272766   | 0.581229902 | 0.944873255 |
| g MGYG-HGUT-01286 | g unclassified Cordycipitaceae | 0.049280293  | 0.524596629 | 0.939740222 |
| g MGYG-HGUT-01286 | g unidentified                 | 0.020163392  | 0.794705548 | 0.987047876 |
| g MGYG-HGUT-02026 | g Verticillium                 | -0.054261361 | 0.483503461 | 0.932872225 |
| g MGYG-HGUT-02026 | g unclassified Tremellomycetes | 0.001829608  | 0.981164971 | 0.998625698 |
| g MGYG-HGUT-02026 | g Candida                      | -0.040022349 | 0.605410179 | 0.950933357 |
| g MGYG-HGUT-02026 | g Cladosporium                 | -0.051928612 | 0.502529972 | 0.936281889 |
| g MGYG-HGUT-02026 | g Debaromyces                  | -0.080594828 | 0.297572903 | 0.892181547 |
| g MGYG-HGUT-02026 | g Aspergillus                  | -0.035414165 | 0.64759146  | 0.955501166 |
| g MGYG-HGUT-02026 | g Kazachstania                 | 0.00258822   | 0.97335785  | 0.998625698 |
| g MGYG-HGUT-02026 | g Malassezia                   | -0.006466593 | 0.933499567 | 0.996251765 |
| g MGYG-HGUT-02026 | g unclassified Fungi           | 0.050834685  | 0.51158558  | 0.938061907 |
| g MGYG-HGUT-02026 | g Fusarium                     | -0.006755917 | 0.930531543 | 0.996251765 |
| g MGYG-HGUT-02026 | g Mycosphaerella               | 0.058736514  | 0.448114099 | 0.922032734 |
| g MGYG-HGUT-02026 | g Simplicillium                | 0.006823387  | 0.929839546 | 0.996251765 |
| g MGYG-HGUT-02026 | g unclassified Cordycipitaceae | -0.005123315 | 0.947290872 | 0.996925697 |
| g MGYG-HGUT-02026 | g unidentified                 | 0.092705867  | 0.23059978  | 0.874689648 |
| g MGYG-HGUT-04074 | g Verticillium                 | 0.107284799  | 0.165026918 | 0.864354699 |



|                    |                                |              |             |             |
|--------------------|--------------------------------|--------------|-------------|-------------|
| g MGYG-HGUT-04074  | g unclassified Tremellomycetes | -0.017838307 | 0.817940077 | 0.991892108 |
| g MGYG-HGUT-04074  | g Candida                      | -0.039670711 | 0.608585663 | 0.951102497 |
| g MGYG-HGUT-04074  | g Cladosporium                 | -0.007903545 | 0.918768487 | 0.996251765 |
| g MGYG-HGUT-04074  | g Debaryomyces                 | -0.078874359 | 0.30803888  | 0.897967316 |
| g MGYG-HGUT-04074  | g Aspergillus                  | -0.085412773 | 0.269530563 | 0.880885289 |
| g MGYG-HGUT-04074  | g Kazachstania                 | -0.122437156 | 0.112775066 | 0.843328451 |
| g MGYG-HGUT-04074  | g Malassezia                   | 0.133154935  | 0.084372471 | 0.8415005   |
| g MGYG-HGUT-04074  | g unclassified Fungi           | -0.091626564 | 0.236096922 | 0.874689648 |
| g MGYG-HGUT-04074  | g Fusarium                     | 0.018218236  | 0.814132024 | 0.991051861 |
| g MGYG-HGUT-04074  | g Mycosphaerella               | 0.014254459  | 0.854058954 | 0.994526835 |
| g MGYG-HGUT-04074  | g Simplicillium                | 0.102511482  | 0.184755112 | 0.873641816 |
| g MGYG-HGUT-04074  | g unclassified Cordycipitaceae | 0.125447813  | 0.104131755 | 0.841929371 |
| g MGYG-HGUT-04074  | g unidentified                 | 0.070817065  | 0.360223875 | 0.900151743 |
| g MGYG-HGUT-03819  | g Verticillium                 | 0.073506836  | 0.342222851 | 0.900151743 |
| g MGYG-HGUT-03819  | g unclassified Tremellomycetes | -0.035133927 | 0.650195009 | 0.955597379 |
| g MGYG-HGUT-03819  | g Candida                      | 0.024001795  | 0.756749398 | 0.981293944 |
| g MGYG-HGUT-03819  | g Cladosporium                 | 0.000155467  | 0.998399389 | 0.999374283 |
| g MGYG-HGUT-03819  | g Debaryomyces                 | -0.062562442 | 0.419051705 | 0.916661525 |
| g MGYG-HGUT-03819  | g Aspergillus                  | -0.099141802 | 0.199688378 | 0.874689648 |
| g MGYG-HGUT-03819  | g Kazachstania                 | -0.018936772 | 0.806942044 | 0.989255135 |
| g MGYG-HGUT-03819  | g Malassezia                   | 0.115401048  | 0.135155851 | 0.849249996 |
| g MGYG-HGUT-03819  | g unclassified Fungi           | -0.091649052 | 0.235981455 | 0.874689648 |
| g MGYG-HGUT-03819  | g Fusarium                     | -0.005135455 | 0.947166155 | 0.996925697 |
| g MGYG-HGUT-03819  | g Mycosphaerella               | -0.010484886 | 0.892378142 | 0.994653074 |
| g MGYG-HGUT-03819  | g Simplicillium                | 0.094110265  | 0.223582707 | 0.874689648 |
| g MGYG-HGUT-03819  | g unclassified Cordycipitaceae | 0.065513223  | 0.397407375 | 0.909588897 |
| g MGYG-HGUT-03819  | g unidentified                 | 0.034867896  | 0.652670496 | 0.955763754 |
| g MGYG-HGUT-02071  | g Verticillium                 | 0.034227127  | 0.65864855  | 0.956966684 |
| g MGYG-HGUT-02071  | g unclassified Tremellomycetes | -0.059507497 | 0.442167967 | 0.92043404  |
| g MGYG-HGUT-02071  | g Candida                      | 0.028732423  | 0.710767205 | 0.968802592 |
| g MGYG-HGUT-02071  | g Cladosporium                 | 0.03089787   | 0.690050569 | 0.96434561  |
| g MGYG-HGUT-02071  | g Debaryomyces                 | -0.044580416 | 0.564932623 | 0.942564508 |
| g MGYG-HGUT-02071  | g Aspergillus                  | -0.008858239 | 0.908996272 | 0.996251765 |
| g MGYG-HGUT-02071  | g Kazachstania                 | -0.037884655 | 0.624826891 | 0.952422937 |
| g MGYG-HGUT-02071  | g Malassezia                   | -0.060617587 | 0.433685609 | 0.918239588 |
| g MGYG-HGUT-02071  | g unclassified Fungi           | 0.011636504  | 0.880640818 | 0.994526835 |
| g MGYG-HGUT-02071  | g Fusarium                     | -0.128265021 | 0.096524418 | 0.8415005   |
| g MGYG-HGUT-02071  | g Mycosphaerella               | 0.000276703  | 0.997151202 | 0.999334917 |
| g MGYG-HGUT-02071  | g Simplicillium                | -0.009114337 | 0.90637712  | 0.995978479 |
| g MGYG-HGUT-02071  | g unclassified Cordycipitaceae | -0.014783422 | 0.848706916 | 0.994526835 |
| g MGYG-HGUT-02071  | g unidentified                 | -0.013101492 | 0.865747417 | 0.994526835 |
| g MGYG-HGUT-03850  | g Verticillium                 | -0.046122026 | 0.551540459 | 0.942564508 |
| g MGYG-HGUT-03850  | g unclassified Tremellomycetes | -0.008791957 | 0.909674305 | 0.996251765 |
| g MGYG-HGUT-03850  | g Candida                      | -0.016247245 | 0.833932697 | 0.994526835 |
| g MGYG-HGUT-03850  | g Cladosporium                 | 0.077150409  | 0.31876523  | 0.988536448 |
| g MGYG-HGUT-03850  | g Debaryomyces                 | 0.003736512  | 0.961545444 | 0.998221928 |
| g MGYG-HGUT-03850  | g Aspergillus                  | -0.049323818 | 0.524230031 | 0.939740222 |
| g MGYG-HGUT-03850  | g Kazachstania                 | -0.023188605 | 0.764745631 | 0.982494893 |
| g MGYG-HGUT-03850  | g Malassezia                   | 0.017858027  | 0.817742317 | 0.991841934 |
| g MGYG-HGUT-03850  | g unclassified Fungi           | 0.035475199  | 0.64702499  | 0.955501166 |
| g MGYG-HGUT-03850  | g Fusarium                     | 0.014359064  | 0.853000022 | 0.994526835 |
| g MGYG-HGUT-03850  | g Mycosphaerella               | -0.055416414 | 0.474227982 | 0.929120273 |
| g MGYG-HGUT-03850  | g Simplicillium                | 0.116363447  | 0.131907921 | 0.849249996 |
| g MGYG-HGUT-03850  | g unclassified Cordycipitaceae | -0.032529625 | 0.674589389 | 0.961701261 |
| g MGYG-HGUT-03850  | g unidentified                 | 0.097094681  | 0.209176766 | 0.874689648 |
| g MGYG-HGUT-00895  | g Verticillium                 | 0.062520735  | 0.419362475 | 0.916661525 |
| g MGYG-HGUT-00895  | g unclassified Tremellomycetes | -0.046457841 | 0.548643836 | 0.942564508 |
| g MGYG-HGUT-00895  | g Candida                      | 0.005477877  | 0.943648926 | 0.996925697 |
| g MGYG-HGUT-00895  | g Cladosporium                 | 0.021637517  | 0.780066193 | 0.985605409 |
| g MGYG-HGUT-00895  | g Debaryomyces                 | -0.083072354 | 0.282920062 | 0.8902203   |
| g MGYG-HGUT-00895  | g Aspergillus                  | -0.006119858 | 0.937057728 | 0.996251765 |
| g MGYG-HGUT-00895  | g Kazachstania                 | 0.125914805  | 0.102839081 | 0.841929371 |
| g MGYG-HGUT-00895  | g Malassezia                   | -0.022549373 | 0.771048848 | 0.98426132  |
| g MGYG-HGUT-00895  | g unclassified Fungi           | -0.009994344 | 0.897385019 | 0.995280411 |
| g MGYG-HGUT-00895  | g Fusarium                     | -0.080707158 | 0.296897864 | 0.892181547 |
| g MGYG-HGUT-00895  | g Mycosphaerella               | 0.081234146  | 0.293744532 | 0.892181547 |
| g MGYG-HGUT-00895  | g Simplicillium                | 0.045512608  | 0.556816035 | 0.942564508 |
| g MGYG-HGUT-00895  | g unclassified Cordycipitaceae | 0.051281917  | 0.507873189 | 0.936546622 |
| g MGYG-HGUT-00895  | g unidentified                 | 0.023224382  | 0.764393301 | 0.982298393 |
| g Faecalibacterium | g Verticillium                 | -0.018550484 | 0.810805435 | 0.990793502 |
| g Faecalibacterium | g unclassified Tremellomycetes | 0.119082288  | 0.123055922 | 0.849176369 |
| g Faecalibacterium | g Candida                      | -0.106825565 | 0.166853666 | 0.864987015 |
| g Faecalibacterium | g Cladosporium                 | 0.054863255  | 0.47865791  | 0.931740764 |
| g Faecalibacterium | g Debaryomyces                 | -0.127850861 | 0.097614319 | 0.8415005   |
| g Faecalibacterium | g Aspergillus                  | -0.074272063 | 0.337207671 | 0.900151743 |
| g Faecalibacterium | g Kazachstania                 | 0.118736067  | 0.124156908 | 0.849176369 |
| g Faecalibacterium | g Malassezia                   | 0.015996028  | 0.836464229 | 0.994526835 |
| g Faecalibacterium | g unclassified Fungi           | 0.036734221  | 0.635385282 | 0.954116909 |

|                    |                                |              |             |             |
|--------------------|--------------------------------|--------------|-------------|-------------|
| g Faecalibacterium | g Fusarium                     | -0.047761678 | 0.537468445 | 0.941323418 |
| g Faecalibacterium | g Mycosphaerella               | 0.045164239  | 0.55984268  | 0.942564508 |
| g Faecalibacterium | g Simplicillium                | -0.005661053 | 0.941767863 | 0.996925697 |
| g Faecalibacterium | g unclassified_Cordycipitaceae | 0.058970224  | 0.4463069   | 0.921010267 |
| g Faecalibacterium | g unidentified                 | 0.009320581  | 0.904268569 | 0.995439902 |
| g Ruminococcus_D   | g Verticillium                 | 0.139177599  | 0.071125691 | 0.8415005   |
| g Ruminococcus_D   | g unclassified_Tremellomycetes | -0.078678084 | 0.309248016 | 0.897967316 |
| g Ruminococcus_D   | g Candida                      | -0.119537039 | 0.121621305 | 0.849176369 |
| g Ruminococcus_D   | g Cladosporium                 | 0.06842936   | 0.376687459 | 0.903790734 |
| g Ruminococcus_D   | g Debaromyces                  | -0.159491408 | 0.038332838 | 0.808354944 |
| g Ruminococcus_D   | g Aspergillus                  | -0.027165046 | 0.725896441 | 0.972631421 |
| g Ruminococcus_D   | g Kazachstania                 | -0.049436388 | 0.523282488 | 0.939740222 |
| g Ruminococcus_D   | g Malassezia                   | 0.125732125  | 0.103343241 | 0.841929371 |
| g Ruminococcus_D   | g unclassified_Fungi           | 0.054489505  | 0.48166369  | 0.932872225 |
| g Ruminococcus_D   | g Fusarium                     | -0.122738823 | 0.111884525 | 0.843328451 |
| g Ruminococcus_D   | g Mycosphaerella               | -0.037911776 | 0.624578886 | 0.952422937 |
| g Ruminococcus_D   | g Simplicillium                | 0.055827023  | 0.470954154 | 0.928769554 |
| g Ruminococcus_D   | g unclassified_Cordycipitaceae | 0.087899819  | 0.255781675 | 0.875637008 |
| g Ruminococcus_D   | g unidentified                 | 0.118326907  | 0.125467841 | 0.849176369 |
| g Gemmiger         | g Verticillium                 | -0.039047965 | 0.614227365 | 0.951172976 |
| g Gemmiger         | g unclassified_Tremellomycetes | 0.048192553  | 0.53380042  | 0.940891392 |
| g Gemmiger         | g Candida                      | -0.085426344 | 0.269454204 | 0.880885289 |
| g Gemmiger         | g Cladosporium                 | 0.047738991  | 0.537661919 | 0.941323418 |
| g Gemmiger         | g Debaromyces                  | -0.069102709 | 0.371998705 | 0.901117392 |
| g Gemmiger         | g Aspergillus                  | -0.08114337  | 0.294286117 | 0.892181547 |
| g Gemmiger         | g Kazachstania                 | 0.055725328  | 0.471763822 | 0.928769554 |
| g Gemmiger         | g Malassezia                   | 0.032519663  | 0.674683374 | 0.961701261 |
| g Gemmiger         | g unclassified_Fungi           | 0.050546173  | 0.51398789  | 0.938277062 |
| g Gemmiger         | g Fusarium                     | -0.01243765  | 0.872490656 | 0.994526835 |
| g Gemmiger         | g Mycosphaerella               | -0.033001863 | 0.670139782 | 0.961102551 |
| g Gemmiger         | g Simplicillium                | 0.076712997  | 0.321524878 | 0.898854824 |
| g Gemmiger         | g unclassified_Cordycipitaceae | -0.046064066 | 0.552041155 | 0.942564508 |
| g Gemmiger         | g unidentified                 | 0.070831047  | 0.360128808 | 0.900151743 |
| g UBA1394          | g Verticillium                 | 0.055043565  | 0.477211456 | 0.931740764 |
| g UBA1394          | g unclassified_Tremellomycetes | -0.041119337 | 0.595551374 | 0.94733741  |
| g UBA1394          | g Candida                      | -0.031629481 | 0.683102085 | 0.963892039 |
| g UBA1394          | g Cladosporium                 | 0.078725049  | 0.308958408 | 0.897967316 |
| g UBA1394          | g Debaromyces                  | -0.06540312  | 0.398202796 | 0.909588897 |
| g UBA1394          | g Aspergillus                  | -0.097253443 | 0.208429531 | 0.874689648 |
| g UBA1394          | g Kazachstania                 | -0.004958776 | 0.94898134  | 0.997073436 |
| g UBA1394          | g Malassezia                   | 0.068098687  | 0.379003216 | 0.90490297  |
| g UBA1394          | g unclassified_Fungi           | -0.096794114 | 0.210596694 | 0.874689648 |
| g UBA1394          | g Fusarium                     | -0.100599354 | 0.193125172 | 0.874689648 |
| g UBA1394          | g Mycosphaerella               | -0.010801764 | 0.889146071 | 0.994639994 |
| g UBA1394          | g Simplicillium                | 0.051899432  | 0.502770431 | 0.936281889 |
| g UBA1394          | g unclassified_Cordycipitaceae | 0.10562697   | 0.171692354 | 0.867877301 |
| g UBA1394          | g unidentified                 | -0.000340658 | 0.996492766 | 0.999334917 |
| g Ruthenibacterium | g Verticillium                 | 0.063782529  | 0.41002009  | 0.913116876 |
| g Ruthenibacterium | g unclassified_Tremellomycetes | -0.068362193 | 0.37715714  | 0.904275409 |
| g Ruthenibacterium | g Candida                      | -0.095511387 | 0.216734171 | 0.874689648 |
| g Ruthenibacterium | g Cladosporium                 | 0.012686568  | 0.869961072 | 0.994526835 |
| g Ruthenibacterium | g Debaromyces                  | -0.005593264 | 0.942463961 | 0.996925697 |
| g Ruthenibacterium | g Aspergillus                  | -0.126679469 | 0.100749771 | 0.8415005   |
| g Ruthenibacterium | g Kazachstania                 | -0.047396502 | 0.540586966 | 0.94160936  |
| g Ruthenibacterium | g Malassezia                   | 0.112553428  | 0.145124973 | 0.849249996 |
| g Ruthenibacterium | g unclassified_Fungi           | -0.12586987  | 0.102962913 | 0.841929371 |
| g Ruthenibacterium | g Fusarium                     | -0.03883976  | 0.616118662 | 0.952145859 |
| g Ruthenibacterium | g Mycosphaerella               | -0.030387126 | 0.694916796 | 0.966217026 |
| g Ruthenibacterium | g Simplicillium                | 0.054930917  | 0.478114847 | 0.931740764 |
| g Ruthenibacterium | g unclassified_Cordycipitaceae | 0.038155001  | 0.622356648 | 0.952309753 |
| g Ruthenibacterium | g unidentified                 | -0.010348473 | 0.893770068 | 0.995135868 |
| g Angelakisella    | g Verticillium                 | 0.043934844  | 0.570586457 | 0.942564508 |
| g Angelakisella    | g unclassified_Tremellomycetes | -0.099795829 | 0.196723661 | 0.874689648 |
| g Angelakisella    | g Candida                      | -0.026818983 | 0.729251416 | 0.973108701 |
| g Angelakisella    | g Cladosporium                 | -0.010700606 | 0.890177661 | 0.994653074 |
| g Angelakisella    | g Debaromyces                  | -0.122368584 | 0.112978267 | 0.843328451 |
| g Angelakisella    | g Aspergillus                  | -0.00808143  | 0.916946699 | 0.996251765 |
| g Angelakisella    | g Kazachstania                 | -0.026638792 | 0.731000357 | 0.973693103 |
| g Angelakisella    | g Malassezia                   | 0.116763832  | 0.130574482 | 0.849249996 |
| g Angelakisella    | g unclassified_Fungi           | 0.053036893  | 0.493441931 | 0.933554982 |
| g Angelakisella    | g Fusarium                     | -0.058838697 | 0.44732345  | 0.921206729 |
| g Angelakisella    | g Mycosphaerella               | -0.066737945 | 0.388623744 | 0.907127903 |
| g Angelakisella    | g Simplicillium                | 0.11928273   | 0.122421974 | 0.849176369 |
| g Angelakisella    | g unclassified_Cordycipitaceae | -0.004204126 | 0.956737377 | 0.99717368  |
| g Angelakisella    | g unidentified                 | 0.148352405  | 0.054237729 | 0.832568254 |
| g MGYG-HGUT-02689  | g Verticillium                 | 0.119796607  | 0.12080827  | 0.849176369 |
| g MGYG-HGUT-02689  | g unclassified_Tremellomycetes | -0.065282554 | 0.399074897 | 0.909588897 |
| g MGYG-HGUT-02689  | g Candida                      | -0.073702278 | 0.340937478 | 0.900151743 |

|                   |                                |              |             |             |
|-------------------|--------------------------------|--------------|-------------|-------------|
| g MGYG-HGUT-02689 | g Cladosporium                 | -0.040491958 | 0.601180856 | 0.949616339 |
| g MGYG-HGUT-02689 | g Debaryomyces                 | 0.038291643  | 0.621109703 | 0.952309753 |
| g MGYG-HGUT-02689 | g Aspergillus                  | 0.002956343  | 0.969570237 | 0.998625698 |
| g MGYG-HGUT-02689 | g Kazachstania                 | -0.013944221 | 0.857201052 | 0.994526835 |
| g MGYG-HGUT-02689 | g Malassezia                   | 0.078375497  | 0.311118155 | 0.897967316 |
| g MGYG-HGUT-02689 | g unclassified Fungi           | -0.001945843 | 0.979968624 | 0.998625698 |
| g MGYG-HGUT-02689 | g Fusarium                     | -0.060997924 | 0.430800987 | 0.918239588 |
| g MGYG-HGUT-02689 | g Mycosphaerella               | -0.016959023 | 0.8267694   | 0.993650851 |
| g MGYG-HGUT-02689 | g Simplicillium                | 0.027143499  | 0.726105185 | 0.972631421 |
| g MGYG-HGUT-02689 | g unclassified Cordycipitaceae | 0.017658688  | 0.819741896 | 0.992381411 |
| g MGYG-HGUT-02689 | g unidentified                 | 0.052051651  | 0.50151673  | 0.936281889 |
| g UBA866          | g Verticillium                 | 0.06024109   | 0.436551977 | 0.919176572 |
| g UBA866          | g unclassified Tremellomycetes | -0.145004294 | 0.059969284 | 0.832568254 |
| g UBA866          | g Candida                      | 0.009466079  | 0.902781453 | 0.995280411 |
| g UBA866          | g Cladosporium                 | -0.044347967 | 0.566965306 | 0.942564508 |
| g UBA866          | g Debaryomyces                 | -0.032696726 | 0.673013604 | 0.961662062 |
| g UBA866          | g Aspergillus                  | -0.093134026 | 0.228444244 | 0.874689648 |
| g UBA866          | g Kazachstania                 | -0.134791407 | 0.080591195 | 0.8415005   |
| g UBA866          | g Malassezia                   | 0.138878331  | 0.071741425 | 0.8415005   |
| g UBA866          | g unclassified Fungi           | -0.117439594 | 0.128347464 | 0.849249996 |
| g UBA866          | g Fusarium                     | -0.069862654 | 0.366750229 | 0.901117392 |
| g UBA866          | g Mycosphaerella               | -0.140269962 | 0.068914536 | 0.836518447 |
| g UBA866          | g Simplicillium                | 0.141113407  | 0.067245806 | 0.836350979 |
| g UBA866          | g unclassified Cordycipitaceae | 0.000799167  | 0.991772312 | 0.999049974 |
| g UBA866          | g unidentified                 | 0.176634429  | 0.021601718 | 0.742601833 |
| g Anaerotruncus   | g Verticillium                 | 0.219915471  | 0.004066719 | 0.600391491 |
| g Anaerotruncus   | g unclassified Tremellomycetes | -0.001870532 | 0.980743757 | 0.998625698 |
| g Anaerotruncus   | g Candida                      | 0.005121242  | 0.947312174 | 0.996925697 |
| g Anaerotruncus   | g Cladosporium                 | 0.075554454  | 0.328908624 | 0.899622647 |
| g Anaerotruncus   | g Debaryomyces                 | -0.07838298  | 0.311071817 | 0.897967316 |
| g Anaerotruncus   | g Aspergillus                  | -0.054952095 | 0.47794935  | 0.931740764 |
| g Anaerotruncus   | g Kazachstania                 | -0.004633515 | 0.952323715 | 0.99717368  |
| g Anaerotruncus   | g Malassezia                   | 0.143542834  | 0.062622657 | 0.832568254 |
| g Anaerotruncus   | g unclassified Fungi           | 0.005142617  | 0.947092584 | 0.996925697 |
| g Anaerotruncus   | g Fusarium                     | -0.048518506 | 0.531033942 | 0.940412658 |
| g Anaerotruncus   | g Mycosphaerella               | -0.085305679 | 0.270133678 | 0.881811135 |
| g Anaerotruncus   | g Simplicillium                | 0.064488555  | 0.404846581 | 0.912338681 |
| g Anaerotruncus   | g unclassified Cordycipitaceae | 0.180932247  | 0.018566329 | 0.702895198 |
| g Anaerotruncus   | g unidentified                 | 0.009929689  | 0.898045251 | 0.995280411 |
| g Neobitarella    | g Verticillium                 | 0.03623605   | 0.63998043  | 0.955341199 |
| g Neobitarella    | g unclassified Tremellomycetes | 0.083761705  | 0.278930707 | 0.889320764 |
| g Neobitarella    | g Candida                      | -0.011440432 | 0.882637431 | 0.994526835 |
| g Neobitarella    | g Cladosporium                 | -0.049768533 | 0.520491794 | 0.939569324 |
| g Neobitarella    | g Debaryomyces                 | -0.019729041 | 0.799032986 | 0.987463135 |
| g Neobitarella    | g Aspergillus                  | -0.015319504 | 0.843289892 | 0.994526835 |
| g Neobitarella    | g Kazachstania                 | -0.044704011 | 0.563853251 | 0.942564508 |
| g Neobitarella    | g Malassezia                   | -0.081036548 | 0.294924277 | 0.892181547 |
| g Neobitarella    | g unclassified Fungi           | -0.159547227 | 0.038264305 | 0.808354944 |
| g Neobitarella    | g Fusarium                     | -0.100000448 | 0.195802719 | 0.874689648 |
| g Neobitarella    | g Mycosphaerella               | 0.050988345  | 0.51030849  | 0.937123036 |
| g Neobitarella    | g Simplicillium                | -0.068876656 | 0.373568772 | 0.901764911 |
| g Neobitarella    | g unclassified Cordycipitaceae | 0.08506309   | 0.271503237 | 0.883558681 |
| g Neobitarella    | g unidentified                 | -0.091411126 | 0.237205107 | 0.874689648 |
| g Phoceae         | g Verticillium                 | 0.255169161  | 0.000813438 | 0.534709451 |
| g Phoceae         | g unclassified Tremellomycetes | -0.118544139 | 0.124770513 | 0.849176369 |
| g Phoceae         | g Candida                      | -0.013104679 | 0.865715061 | 0.994526835 |
| g Phoceae         | g Cladosporium                 | -0.027596648 | 0.721719494 | 0.971835476 |
| g Phoceae         | g Debaryomyces                 | -0.065014887 | 0.401015096 | 0.910743236 |
| g Phoceae         | g Aspergillus                  | 0.065314865  | 0.398841063 | 0.909588897 |
| g Phoceae         | g Kazachstania                 | 0.048091911  | 0.534656056 | 0.941002818 |
| g Phoceae         | g Malassezia                   | 0.160066764  | 0.037631365 | 0.808354944 |
| g Phoceae         | g unclassified Fungi           | 0.04338229   | 0.575446765 | 0.943352947 |
| g Phoceae         | g Fusarium                     | 0.004245186  | 0.95631527  | 0.99717368  |
| g Phoceae         | g Mycosphaerella               | 0.029719312  | 0.701298361 | 0.967505184 |
| g Phoceae         | g Simplicillium                | 0.044457742  | 0.566004925 | 0.942564508 |
| g Phoceae         | g unclassified Cordycipitaceae | 0.113031881  | 0.143412051 | 0.849249996 |
| g Phoceae         | g unidentified                 | 0.105694282  | 0.171417889 | 0.867877301 |
| g MGYG-HGUT-04022 | g Verticillium                 | 0.130158851  | 0.091663005 | 0.8415005   |
| g MGYG-HGUT-04022 | g unclassified Tremellomycetes | -0.059587224 | 0.441555646 | 0.920232298 |
| g MGYG-HGUT-04022 | g Candida                      | -0.01820525  | 0.814262108 | 0.991079447 |
| g MGYG-HGUT-04022 | g Cladosporium                 | 0.010595429  | 0.891250429 | 0.994653074 |
| g MGYG-HGUT-04022 | g Debaryomyces                 | -0.117924107 | 0.126768813 | 0.849249996 |
| g MGYG-HGUT-04022 | g Aspergillus                  | 0.013846955  | 0.85818663  | 0.994526835 |
| g MGYG-HGUT-04022 | g Kazachstania                 | -0.071665502 | 0.35448325  | 0.900151743 |
| g MGYG-HGUT-04022 | g Malassezia                   | 0.139786517  | 0.069886119 | 0.8415005   |
| g MGYG-HGUT-04022 | g unclassified Fungi           | -0.02934094  | 0.704923365 | 0.967508066 |
| g MGYG-HGUT-04022 | g Fusarium                     | 0.048951436  | 0.527370698 | 0.940363396 |
| g MGYG-HGUT-04022 | g Mycosphaerella               | -0.11947013  | 0.12183157  | 0.849176369 |

|                       |                                       |              |             |             |
|-----------------------|---------------------------------------|--------------|-------------|-------------|
| g MGYG-HGUT-04022     | g <i>Simplicillium</i>                | 0.140220449  | 0.069013536 | 0.836518447 |
| g MGYG-HGUT-04022     | g unclassified <i>Cordycipitaceae</i> | 0.137027681  | 0.075645827 | 0.8415005   |
| g MGYG-HGUT-04022     | g unidentified                        | -0.039756413 | 0.607811049 | 0.951102497 |
| g Fournierella        | g <i>Verticillium</i>                 | 0.11608699   | 0.132834717 | 0.849249996 |
| g Fournierella        | g unclassified <i>Tremellomycetes</i> | 0.004414069  | 0.954579218 | 0.99717368  |
| g Fournierella        | g <i>Candida</i>                      | -0.049885444 | 0.519511312 | 0.939250598 |
| g Fournierella        | g <i>Cladosporium</i>                 | -0.053320596 | 0.491129633 | 0.932872225 |
| g Fournierella        | g <i>Debaromyces</i>                  | -0.045493885 | 0.556978498 | 0.942564508 |
| g Fournierella        | g <i>Aspergillus</i>                  | -0.035944627 | 0.642674898 | 0.955341199 |
| g Fournierella        | g <i>Kazachstania</i>                 | -0.054248964 | 0.483603541 | 0.932872225 |
| g Fournierella        | g <i>Malassezia</i>                   | 0.113017629  | 0.143462854 | 0.849249996 |
| g Fournierella        | g unclassified <i>Fungi</i>           | -0.064961846 | 0.401400233 | 0.910801415 |
| g Fournierella        | g <i>Fusarium</i>                     | 0.019364364  | 0.80267099  | 0.988396129 |
| g Fournierella        | g <i>Mycosphaerella</i>               | -0.00137707  | 0.98582309  | 0.999049974 |
| g Fournierella        | g <i>Simplicillium</i>                | 0.034957478  | 0.651836487 | 0.955597379 |
| g Fournierella        | g unclassified <i>Cordycipitaceae</i> | 0.138250432  | 0.073047371 | 0.8415005   |
| g Fournierella        | g unidentified                        | 0.100301001  | 0.194455675 | 0.874689648 |
| g Ruminococcus C      | g <i>Verticillium</i>                 | 0.092350891  | 0.232397717 | 0.874689648 |
| g Ruminococcus C      | g unclassified <i>Tremellomycetes</i> | -0.092064237 | 0.233856782 | 0.874689648 |
| g Ruminococcus C      | g <i>Candida</i>                      | -0.026399253 | 0.733327467 | 0.973693103 |
| g Ruminococcus C      | g <i>Cladosporium</i>                 | 0.020619678  | 0.790166304 | 0.986710331 |
| g Ruminococcus C      | g <i>Debaromyces</i>                  | -0.039084797 | 0.613893054 | 0.951172976 |
| g Ruminococcus C      | g <i>Aspergillus</i>                  | 0.006774442  | 0.930341547 | 0.996251765 |
| g Ruminococcus C      | g <i>Kazachstania</i>                 | 0.069539571  | 0.368975948 | 0.901117392 |
| g Ruminococcus C      | g <i>Malassezia</i>                   | -0.001828902 | 0.981172243 | 0.998625698 |
| g Ruminococcus C      | g unclassified <i>Fungi</i>           | 0.062817595  | 0.417153417 | 0.916661525 |
| g Ruminococcus C      | g <i>Fusarium</i>                     | -0.059447155 | 0.442631733 | 0.92043404  |
| g Ruminococcus C      | g <i>Mycosphaerella</i>               | -0.009798443 | 0.899385694 | 0.995280411 |
| g Ruminococcus C      | g <i>Simplicillium</i>                | 0.037605813  | 0.627379141 | 0.95290209  |
| g Ruminococcus C      | g unclassified <i>Cordycipitaceae</i> | -0.008197944 | 0.915753658 | 0.996251765 |
| g Ruminococcus C      | g unidentified                        | 0.114991192  | 0.136557492 | 0.849249996 |
| g Ruminococcus        | g <i>Verticillium</i>                 | 0.066019513  | 0.393762001 | 0.907694413 |
| g Ruminococcus        | g unclassified <i>Tremellomycetes</i> | 0.043176898  | 0.577258339 | 0.943618965 |
| g Ruminococcus        | g <i>Candida</i>                      | -0.041688819 | 0.590462141 | 0.947252808 |
| g Ruminococcus        | g <i>Cladosporium</i>                 | 0.155773497  | 0.043136219 | 0.812441332 |
| g Ruminococcus        | g <i>Debaromyces</i>                  | -0.110274555 | 0.153497363 | 0.85006873  |
| g Ruminococcus        | g <i>Aspergillus</i>                  | -0.124785965 | 0.105985678 | 0.841929371 |
| g Ruminococcus        | g <i>Kazachstania</i>                 | 0.09790406   | 0.205387335 | 0.874689648 |
| g Ruminococcus        | g <i>Malassezia</i>                   | 0.072710277  | 0.347493325 | 0.900151743 |
| g Ruminococcus        | g unclassified <i>Fungi</i>           | -0.040305463 | 0.602858857 | 0.950399198 |
| g Ruminococcus        | g <i>Fusarium</i>                     | -0.073510744 | 0.342197119 | 0.900151743 |
| g Ruminococcus        | g <i>Mycosphaerella</i>               | -0.07420964  | 0.337615018 | 0.900151743 |
| g Ruminococcus        | g <i>Simplicillium</i>                | 0.128777378  | 0.095189474 | 0.8415005   |
| g Ruminococcus        | g unclassified <i>Cordycipitaceae</i> | 0.103929779  | 0.178720789 | 0.872371283 |
| g Ruminococcus        | g unidentified                        | -0.034364655 | 0.657363646 | 0.956614192 |
| g MGYG-HGUT-03337     | g <i>Verticillium</i>                 | 0.184172671  | 0.016529169 | 0.702895198 |
| g MGYG-HGUT-03337     | g unclassified <i>Tremellomycetes</i> | 0.004808997  | 0.950520359 | 0.99717368  |
| g MGYG-HGUT-03337     | g <i>Candida</i>                      | -0.029106501 | 0.70717276  | 0.96831002  |
| g MGYG-HGUT-03337     | g <i>Cladosporium</i>                 | 0.122700845  | 0.111996337 | 0.843328451 |
| g MGYG-HGUT-03337     | g <i>Debaromyces</i>                  | -0.076103966 | 0.325392945 | 0.899370541 |
| g MGYG-HGUT-03337     | g <i>Aspergillus</i>                  | -0.086606396 | 0.2628705   | 0.878368327 |
| g MGYG-HGUT-03337     | g <i>Kazachstania</i>                 | -0.091442398 | 0.237044023 | 0.874689648 |
| g MGYG-HGUT-03337     | g <i>Malassezia</i>                   | 0.098000742  | 0.204938004 | 0.874689648 |
| g MGYG-HGUT-03337     | g unclassified <i>Fungi</i>           | -0.046734332 | 0.546264521 | 0.942564508 |
| g MGYG-HGUT-03337     | g <i>Fusarium</i>                     | -0.111353735 | 0.149488271 | 0.849249996 |
| g MGYG-HGUT-03337     | g <i>Mycosphaerella</i>               | -0.024867417 | 0.748265878 | 0.979147232 |
| g MGYG-HGUT-03337     | g <i>Simplicillium</i>                | 0.07028637   | 0.363843856 | 0.901117392 |
| g MGYG-HGUT-03337     | g unclassified <i>Cordycipitaceae</i> | 0.146461044  | 0.057417111 | 0.832568254 |
| g MGYG-HGUT-03337     | g unidentified                        | 0.048449667  | 0.531617602 | 0.940412658 |
| g Massilioclostridium | g <i>Verticillium</i>                 | 0.072645087  | 0.347926912 | 0.900151743 |
| g Massilioclostridium | g unclassified <i>Tremellomycetes</i> | -0.087678505 | 0.256985197 | 0.877153321 |
| g Massilioclostridium | g <i>Candida</i>                      | -0.112706586 | 0.144574966 | 0.849249996 |
| g Massilioclostridium | g <i>Cladosporium</i>                 | -0.047681977 | 0.538148305 | 0.941323418 |
| g Massilioclostridium | g <i>Debaromyces</i>                  | -0.096971462 | 0.209758041 | 0.874689648 |
| g Massilioclostridium | g <i>Aspergillus</i>                  | -0.043818611 | 0.571607243 | 0.942564508 |
| g Massilioclostridium | g <i>Kazachstania</i>                 | -0.001056529 | 0.989122822 | 0.999049974 |
| g Massilioclostridium | g <i>Malassezia</i>                   | 0.059803099  | 0.439900084 | 0.91979111  |
| g Massilioclostridium | g unclassified <i>Fungi</i>           | -0.077604709 | 0.315915353 | 0.985252398 |
| g Massilioclostridium | g <i>Fusarium</i>                     | -0.144734894 | 0.060451328 | 0.832568254 |
| g Massilioclostridium | g <i>Mycosphaerella</i>               | -0.072948025 | 0.345914922 | 0.900151743 |
| g Massilioclostridium | g <i>Simplicillium</i>                | 0.073481327  | 0.342390845 | 0.900151743 |
| g Massilioclostridium | g unclassified <i>Cordycipitaceae</i> | 0.07099976   | 0.35898288  | 0.900151743 |
| g Massilioclostridium | g unidentified                        | 0.113319572  | 0.14238951  | 0.849249996 |
| g UBA3818             | g <i>Verticillium</i>                 | 0.047886219  | 0.536406937 | 0.941323418 |
| g UBA3818             | g unclassified <i>Tremellomycetes</i> | 0.047573831  | 0.539071493 | 0.941536464 |
| g UBA3818             | g <i>Candida</i>                      | -0.028825673 | 0.709870587 | 0.968802592 |
| g UBA3818             | g <i>Cladosporium</i>                 | 0.0571775    | 0.460274313 | 0.92758646  |
| g UBA3818             | g <i>Debaromyces</i>                  | -0.071185452 | 0.357724259 | 0.900151743 |



|                       |                                |              |             |             |
|-----------------------|--------------------------------|--------------|-------------|-------------|
| g UBA3818             | g Aspergillus                  | -0.037325833 | 0.629946263 | 0.953862502 |
| g UBA3818             | g Kazachstania                 | 0.058419355  | 0.450573164 | 0.922954709 |
| g UBA3818             | g Malassezia                   | 0.037416956  | 0.629110276 | 0.953713015 |
| g UBA3818             | g unclassified_Fungi           | -0.014072417 | 0.855902404 | 0.994526835 |
| g UBA3818             | g Fusarium                     | 0.010626414  | 0.89093437  | 0.994653074 |
| g UBA3818             | g Mycosphaerella               | -0.00750834  | 0.922817432 | 0.996251765 |
| g UBA3818             | g Simplicillium                | 0.044573821  | 0.56499025  | 0.942564508 |
| g UBA3818             | g unclassified_Cordycipitaceae | 0.108792887  | 0.15913295  | 0.85940316  |
| g UBA3818             | g unidentified                 | 0.085889963  | 0.26685435  | 0.878368327 |
| g Ruminiclostridium E | g Verticillium                 | 0.052378299  | 0.498831942 | 0.936237403 |
| g Ruminiclostridium E | g unclassified_Tremellomycetes | -0.01447117  | 0.851865455 | 0.994526835 |
| g Ruminiclostridium E | g Candida                      | -0.075957271 | 0.326329092 | 0.899370541 |
| g Ruminiclostridium E | g Cladosporium                 | 0.057574461  | 0.457160797 | 0.924332119 |
| g Ruminiclostridium E | g Debaryomyces                 | -0.085993755 | 0.266274658 | 0.878368327 |
| g Ruminiclostridium E | g Aspergillus                  | -0.027500588 | 0.72264843  | 0.972171831 |
| g Ruminiclostridium E | g Kazachstania                 | 0.061626896  | 0.426054904 | 0.918239588 |
| g Ruminiclostridium E | g Malassezia                   | 0.191034367  | 0.012847377 | 0.673465348 |
| g Ruminiclostridium E | g unclassified_Fungi           | -0.045011101 | 0.561175651 | 0.942564508 |
| g Ruminiclostridium E | g Fusarium                     | -0.023310896 | 0.763541506 | 0.982076388 |
| g Ruminiclostridium E | g Mycosphaerella               | -0.027431209 | 0.723319608 | 0.972631421 |
| g Ruminiclostridium E | g Simplicillium                | 0.06130525   | 0.428478183 | 0.918239588 |
| g Ruminiclostridium E | g unclassified_Cordycipitaceae | 0.070681233  | 0.361148272 | 0.900157702 |
| g Ruminiclostridium E | g unidentified                 | 0.022662254  | 0.769934667 | 0.98374619  |
| g Provencibacterium   | g Verticillium                 | 0.156988279  | 0.04151417  | 0.808354944 |
| g Provencibacterium   | g unclassified_Tremellomycetes | -0.0812285   | 0.293778201 | 0.892181547 |
| g Provencibacterium   | g Candida                      | -0.108275746 | 0.161136013 | 0.859887758 |
| g Provencibacterium   | g Cladosporium                 | 0.060947301  | 0.431184297 | 0.918239588 |
| g Provencibacterium   | g Debaryomyces                 | -0.10190724  | 0.187370832 | 0.873641816 |
| g Provencibacterium   | g Aspergillus                  | -0.055833742 | 0.470900682 | 0.928769554 |
| g Provencibacterium   | g Kazachstania                 | -0.097871238 | 0.205540036 | 0.874689648 |
| g Provencibacterium   | g Malassezia                   | 0.048484144  | 0.531325245 | 0.940412658 |
| g Provencibacterium   | g unclassified_Fungi           | 0.086401067  | 0.264008084 | 0.878368327 |
| g Provencibacterium   | g Fusarium                     | -0.072180609 | 0.351026069 | 0.900151743 |
| g Provencibacterium   | g Mycosphaerella               | -0.01563129  | 0.840142704 | 0.994526835 |
| g Provencibacterium   | g Simplicillium                | 0.076845579  | 0.320686786 | 0.898741278 |
| g Provencibacterium   | g unclassified_Cordycipitaceae | 0.203911675  | 0.007833185 | 0.613926619 |
| g Provencibacterium   | g unidentified                 | 0.132354688  | 0.086272655 | 0.8415005   |
| g Ruminococcus F      | g Verticillium                 | 0.084727677  | 0.273404591 | 0.886311878 |
| g Ruminococcus F      | g unclassified_Tremellomycetes | -0.106489837 | 0.168198632 | 0.864987015 |
| g Ruminococcus F      | g Candida                      | -0.013101723 | 0.86574507  | 0.994526835 |
| g Ruminococcus F      | g Cladosporium                 | 0.017241858  | 0.823926889 | 0.992484281 |
| g Ruminococcus F      | g Debaryomyces                 | -0.074080391 | 0.338459444 | 0.900151743 |
| g Ruminococcus F      | g Aspergillus                  | -0.043453051 | 0.574823266 | 0.943352947 |
| g Ruminococcus F      | g Kazachstania                 | -0.030538875 | 0.693469658 | 0.966086731 |
| g Ruminococcus F      | g Malassezia                   | 0.018948239  | 0.80682743  | 0.989255135 |
| g Ruminococcus F      | g unclassified_Fungi           | 0.033255969  | 0.667750219 | 0.960290166 |
| g Ruminococcus F      | g Fusarium                     | -0.092401821 | 0.232139152 | 0.874689648 |
| g Ruminococcus F      | g Mycosphaerella               | -0.048000221 | 0.535436182 | 0.941323418 |
| g Ruminococcus F      | g Simplicillium                | 0.049520372  | 0.52257613  | 0.939740222 |
| g Ruminococcus F      | g unclassified_Cordycipitaceae | 0.037823916  | 0.625382454 | 0.952422997 |
| g Ruminococcus F      | g unidentified                 | 0.069817026  | 0.367064059 | 0.901117392 |
| g Negativibacillus    | g Verticillium                 | 0.148255184  | 0.05439753  | 0.832568254 |
| g Negativibacillus    | g unclassified_Tremellomycetes | -0.045092323 | 0.560468475 | 0.942564508 |
| g Negativibacillus    | g Candida                      | 0.040169023  | 0.604087809 | 0.950399198 |
| g Negativibacillus    | g Cladosporium                 | 0.026741789  | 0.730000498 | 0.973325332 |
| g Negativibacillus    | g Debaryomyces                 | -0.046049164 | 0.552169926 | 0.942564508 |
| g Negativibacillus    | g Aspergillus                  | 0.058966014  | 0.446339419 | 0.921010267 |
| g Negativibacillus    | g Kazachstania                 | -0.074458992 | 0.335989714 | 0.900151743 |
| g Negativibacillus    | g Malassezia                   | 0.124774297  | 0.106018595 | 0.841929371 |
| g Negativibacillus    | g unclassified_Fungi           | 0.035155872  | 0.649990981 | 0.955597379 |
| g Negativibacillus    | g Fusarium                     | -0.047319446 | 0.541246147 | 0.94160936  |
| g Negativibacillus    | g Mycosphaerella               | 0.067458199  | 0.383513282 | 0.905460587 |
| g Negativibacillus    | g Simplicillium                | 0.122177325  | 0.113546534 | 0.843328451 |
| g Negativibacillus    | g unclassified_Cordycipitaceae | 0.040829477  | 0.598149339 | 0.948266952 |
| g Negativibacillus    | g unidentified                 | 0.113000071  | 0.143525456 | 0.849249996 |
| g CAG-353             | g Verticillium                 | 0.111739046  | 0.148076206 | 0.849249996 |
| g CAG-353             | g unclassified_Tremellomycetes | -0.103185067 | 0.181870886 | 0.872371283 |
| g CAG-353             | g Candida                      | -0.058156403 | 0.452617675 | 0.923868417 |
| g CAG-353             | g Cladosporium                 | -0.00806075  | 0.917158461 | 0.996251765 |
| g CAG-353             | g Debaryomyces                 | -0.181311438 | 0.018317207 | 0.702895198 |
| g CAG-353             | g Aspergillus                  | -0.047190908 | 0.542346629 | 0.941959714 |
| g CAG-353             | g Kazachstania                 | 0.042940936  | 0.579342823 | 0.944349272 |
| g CAG-353             | g Malassezia                   | 0.031437056  | 0.6849271   | 0.963892039 |
| g CAG-353             | g unclassified_Fungi           | 0.091378684  | 0.237372299 | 0.874689648 |
| g CAG-353             | g Fusarium                     | -0.097621613 | 0.206704064 | 0.874689648 |
| g CAG-353             | g Mycosphaerella               | -0.079206872 | 0.305997548 | 0.897967316 |
| g CAG-353             | g Simplicillium                | 0.040935744  | 0.597196296 | 0.948155743 |
| g CAG-353             | g unclassified_Cordycipitaceae | 0.025228553  | 0.74473541  | 0.978592408 |

|                   |                                |              |             |             |
|-------------------|--------------------------------|--------------|-------------|-------------|
| g CAG-353         | g unidentified                 | 0.084505677  | 0.274667992 | 0.886857663 |
| g MGYG-HGUT-02089 | g Verticillium                 | 0.004324896  | 0.955495858 | 0.99717368  |
| g MGYG-HGUT-02089 | g unclassified Tremellomycetes | -0.156021708 | 0.042800546 | 0.812441332 |
| g MGYG-HGUT-02089 | g Candida                      | -0.047984587 | 0.535569264 | 0.941323418 |
| g MGYG-HGUT-02089 | g Cladosporium                 | -0.025922992 | 0.737961544 | 0.976420387 |
| g MGYG-HGUT-02089 | g Debaryomyces                 | -0.007034611 | 0.927673479 | 0.996251765 |
| g MGYG-HGUT-02089 | g Aspergillus                  | -0.012004902 | 0.87689145  | 0.994526835 |
| g MGYG-HGUT-02089 | g Kazachstania                 | -0.022252195 | 0.773984337 | 0.984510076 |
| g MGYG-HGUT-02089 | g Malassezia                   | 0.031530416  | 0.68404142  | 0.963892039 |
| g MGYG-HGUT-02089 | g unclassified Fungi           | 0.096741798  | 0.210844544 | 0.874689648 |
| g MGYG-HGUT-02089 | g Fusarium                     | -0.038972205 | 0.614915258 | 0.951720881 |
| g MGYG-HGUT-02089 | g Mycosphaerella               | -0.050995075 | 0.510252596 | 0.937123036 |
| g MGYG-HGUT-02089 | g Simplicillium                | 0.039851735  | 0.606949997 | 0.950933357 |
| g MGYG-HGUT-02089 | g unclassified Cordycipitaceae | -0.041307447 | 0.59386812  | 0.947273049 |
| g MGYG-HGUT-02089 | g unidentified                 | 0.117055319  | 0.129610253 | 0.849249996 |
| g MGYG-HGUT-03583 | g Verticillium                 | 0.070861047  | 0.359924875 | 0.900151743 |
| g MGYG-HGUT-03583 | g unclassified Tremellomycetes | 0.015635365  | 0.840101592 | 0.994526835 |
| g MGYG-HGUT-03583 | g Candida                      | 0.017989466  | 0.81642448  | 0.991841934 |
| g MGYG-HGUT-03583 | g Cladosporium                 | 0.125145492  | 0.104975404 | 0.841929371 |
| g MGYG-HGUT-03583 | g Debaryomyces                 | -0.074331613 | 0.336819362 | 0.900151743 |
| g MGYG-HGUT-03583 | g Aspergillus                  | -0.017347587 | 0.822864888 | 0.992484281 |
| g MGYG-HGUT-03583 | g Kazachstania                 | 0.119145073  | 0.122857074 | 0.849176369 |
| g MGYG-HGUT-03583 | g Malassezia                   | 0.173611852  | 0.023984716 | 0.765986149 |
| g MGYG-HGUT-03583 | g unclassified Fungi           | -0.016780992 | 0.828559785 | 0.993650851 |
| g MGYG-HGUT-03583 | g Fusarium                     | -0.064252138 | 0.406574638 | 0.913116876 |
| g MGYG-HGUT-03583 | g Mycosphaerella               | -0.052831903 | 0.495116273 | 0.934115958 |
| g MGYG-HGUT-03583 | g Simplicillium                | 0.125249441  | 0.104684723 | 0.841929371 |
| g MGYG-HGUT-03583 | g unclassified Cordycipitaceae | 0.041989685  | 0.587781457 | 0.947150582 |
| g MGYG-HGUT-03583 | g unidentified                 | 0.02667041   | 0.730693369 | 0.973690981 |
| g Massilimoniae   | g Verticillium                 | 0.153931715  | 0.045696492 | 0.825673201 |
| g Massilimoniae   | g unclassified Tremellomycetes | -0.111657503 | 0.148374196 | 0.849249996 |
| g Massilimoniae   | g Candida                      | -0.040530483 | 0.600834486 | 0.949569069 |
| g Massilimoniae   | g Cladosporium                 | 0.069009237  | 0.372647429 | 0.901117392 |
| g Massilimoniae   | g Debaryomyces                 | -0.14121561  | 0.067045858 | 0.836350979 |
| g Massilimoniae   | g Aspergillus                  | -0.117781901 | 0.127230591 | 0.849249996 |
| g Massilimoniae   | g Kazachstania                 | 0.006363697  | 0.934555338 | 0.996251765 |
| g Massilimoniae   | g Malassezia                   | 0.137982938  | 0.073609547 | 0.8415005   |
| g Massilimoniae   | g unclassified Fungi           | 0.001155252  | 0.988106517 | 0.999049974 |
| g Massilimoniae   | g Fusarium                     | -0.110254823 | 0.153571415 | 0.85006873  |
| g Massilimoniae   | g Mycosphaerella               | -0.029711072 | 0.701377231 | 0.967505184 |
| g Massilimoniae   | g Simplicillium                | 0.012353081  | 0.873350369 | 0.994526835 |
| g Massilimoniae   | g unclassified Cordycipitaceae | 0.090129312  | 0.243873882 | 0.874689648 |
| g Massilimoniae   | g unidentified                 | 0.102819152  | 0.183433562 | 0.873641816 |
| g QANG01          | g Verticillium                 | 0.060983234  | 0.430912195 | 0.918239588 |
| g QANG01          | g unclassified Tremellomycetes | -0.093040562 | 0.228913562 | 0.874689648 |
| g QANG01          | g Candida                      | -0.040395481 | 0.602048654 | 0.949974496 |
| g QANG01          | g Cladosporium                 | 0.004896078  | 0.94962556  | 0.99717368  |
| g QANG01          | g Debaryomyces                 | -0.038598659 | 0.618311928 | 0.952309753 |
| g QANG01          | g Aspergillus                  | 0.022934301  | 0.767251402 | 0.982737948 |
| g QANG01          | g Kazachstania                 | -0.056834169 | 0.462976643 | 0.927602832 |
| g QANG01          | g Malassezia                   | 0.143751072  | 0.062238812 | 0.832568254 |
| g QANG01          | g unclassified Fungi           | -0.026826645 | 0.729177077 | 0.973108701 |
| g QANG01          | g Fusarium                     | -0.000748443 | 0.992294514 | 0.999049974 |
| g QANG01          | g Mycosphaerella               | -0.006989883 | 0.928132121 | 0.996251765 |
| g QANG01          | g Simplicillium                | 0.05672931   | 0.463803724 | 0.927602832 |
| g QANG01          | g unclassified Cordycipitaceae | 0.01580949   | 0.838345079 | 0.994526835 |
| g QANG01          | g unidentified                 | 0.140070068  | 0.069314923 | 0.837041208 |
| g Bittarella      | g Verticillium                 | 0.251702887  | 0.000962842 | 0.534709451 |
| g Bittarella      | g unclassified Tremellomycetes | -0.052932763 | 0.494292082 | 0.93383942  |
| g Bittarella      | g Candida                      | -0.082337926 | 0.287212247 | 0.891214772 |
| g Bittarella      | g Cladosporium                 | 0.047946986  | 0.535889384 | 0.941323418 |
| g Bittarella      | g Debaryomyces                 | -0.139381638 | 0.070708356 | 0.8415005   |
| g Bittarella      | g Aspergillus                  | -0.029297583 | 0.705339178 | 0.967508066 |
| g Bittarella      | g Kazachstania                 | -0.029570599 | 0.702722308 | 0.967508066 |
| g Bittarella      | g Malassezia                   | 0.147362715  | 0.055882748 | 0.832568254 |
| g Bittarella      | g unclassified Fungi           | -0.063885913 | 0.409260105 | 0.913116876 |
| g Bittarella      | g Fusarium                     | -0.046688399 | 0.546659439 | 0.942564508 |
| g Bittarella      | g Mycosphaerella               | 0.042401551  | 0.584120838 | 0.945124317 |
| g Bittarella      | g Simplicillium                | 0.100630607  | 0.192986181 | 0.874689648 |
| g Bittarella      | g unclassified Cordycipitaceae | 0.162788088  | 0.034458475 | 0.808354944 |
| g Bittarella      | g unidentified                 | 0.090008704  | 0.244508012 | 0.874689648 |
| g QAMM01          | g Verticillium                 | 0.147369544  | 0.055871258 | 0.832568254 |
| g QAMM01          | g unclassified Tremellomycetes | 0.085094435  | 0.271326008 | 0.883543941 |
| g QAMM01          | g Candida                      | 0.014029559  | 0.856336521 | 0.994526835 |
| g QAMM01          | g Cladosporium                 | 0.099321842  | 0.198869044 | 0.874689648 |
| g QAMM01          | g Debaryomyces                 | -0.108882612 | 0.158787326 | 0.859221039 |
| g QAMM01          | g Aspergillus                  | -0.027116305 | 0.72636866  | 0.972631421 |
| g QAMM01          | g Kazachstania                 | -0.054215566 | 0.483873213 | 0.932872225 |

|                   |                                |              |             |             |
|-------------------|--------------------------------|--------------|-------------|-------------|
| g QAMM01          | g Malassezia                   | 0.067586705  | 0.382605791 | 0.905460587 |
| g QAMM01          | g unclassified Fungi           | -0.118950905 | 0.123472827 | 0.849176369 |
| g QAMM01          | g Fusarium                     | -0.060442805 | 0.43501493  | 0.91904345  |
| g QAMM01          | g Mycosphaerella               | -0.008335699 | 0.914343374 | 0.996251765 |
| g QAMM01          | g Simplicillium                | 0.029973616  | 0.698865762 | 0.967505184 |
| g QAMM01          | g unclassified Cordycipitaceae | 0.119492298  | 0.121761874 | 0.849176369 |
| g QAMM01          | g unidentified                 | -0.064027882 | 0.408217833 | 0.913116876 |
| g MGYG-HGUT-04104 | g Verticillium                 | 0.046608265  | 0.54734875  | 0.942564508 |
| g MGYG-HGUT-04104 | g unclassified Tremellomycetes | -0.105281563 | 0.173105883 | 0.868752404 |
| g MGYG-HGUT-04104 | g Candida                      | -0.020336341 | 0.792984185 | 0.986710331 |
| g MGYG-HGUT-04104 | g Cladosporium                 | 0.012613653  | 0.870701917 | 0.994526835 |
| g MGYG-HGUT-04104 | g Debaromyces                  | -0.04172455  | 0.590143488 | 0.947252808 |
| g MGYG-HGUT-04104 | g Aspergillus                  | 0.053363647  | 0.490779256 | 0.932872225 |
| g MGYG-HGUT-04104 | g Kazachstania                 | -0.136279846 | 0.077271549 | 0.8415005   |
| g MGYG-HGUT-04104 | g Malassezia                   | 0.078362329  | 0.31119971  | 0.897967316 |
| g MGYG-HGUT-04104 | g unclassified Fungi           | 0.052218227  | 0.50014666  | 0.936281889 |
| g MGYG-HGUT-04104 | g Fusarium                     | -0.044250171 | 0.567821529 | 0.942564508 |
| g MGYG-HGUT-04104 | g Mycosphaerella               | -0.056270878 | 0.467429189 | 0.928418018 |
| g MGYG-HGUT-04104 | g Simplicillium                | 0.123944005  | 0.108381497 | 0.843328451 |
| g MGYG-HGUT-04104 | g unclassified Cordycipitaceae | 0.05863636   | 0.448889818 | 0.922032734 |
| g MGYG-HGUT-04104 | g unidentified                 | 0.157211361  | 0.041221932 | 0.808354944 |
| g UBA1409         | g Verticillium                 | 0.025745416  | 0.739691799 | 0.977217936 |
| g UBA1409         | g unclassified Tremellomycetes | -0.002497175 | 0.974294698 | 0.998625698 |
| g UBA1409         | g Candida                      | -0.101219184 | 0.190382249 | 0.874689648 |
| g UBA1409         | g Cladosporium                 | 0.085551269  | 0.26875197  | 0.880885289 |
| g UBA1409         | g Debaromyces                  | -0.077749964 | 0.31500766  | 0.898525398 |
| g UBA1409         | g Aspergillus                  | -0.030988349 | 0.689189822 | 0.96434561  |
| g UBA1409         | g Kazachstania                 | 0.061468207  | 0.427249472 | 0.918239588 |
| g UBA1409         | g Malassezia                   | 0.090844249  | 0.240138424 | 0.874689648 |
| g UBA1409         | g unclassified Fungi           | -0.018236391 | 0.813950159 | 0.991049439 |
| g UBA1409         | g Fusarium                     | -0.042703749 | 0.581441648 | 0.944873255 |
| g UBA1409         | g Mycosphaerella               | -0.013907742 | 0.857570658 | 0.994526835 |
| g UBA1409         | g Simplicillium                | 0.150871376  | 0.050230728 | 0.832568254 |
| g UBA1409         | g unclassified Cordycipitaceae | 0.103765019  | 0.179414225 | 0.872371283 |
| g UBA1409         | g unidentified                 | 0.006654967  | 0.931567034 | 0.996251765 |
| g MGYG-HGUT-03104 | g Verticillium                 | 0.101261086  | 0.190197852 | 0.87463999  |
| g MGYG-HGUT-03104 | g unclassified Tremellomycetes | -0.042442018 | 0.583761743 | 0.945028002 |
| g MGYG-HGUT-03104 | g Candida                      | -0.068183235 | 0.378410292 | 0.904750985 |
| g MGYG-HGUT-03104 | g Cladosporium                 | 0.025314066  | 0.743900209 | 0.978404143 |
| g MGYG-HGUT-03104 | g Debaromyces                  | -0.020323998 | 0.793107002 | 0.986710331 |
| g MGYG-HGUT-03104 | g Aspergillus                  | -0.148649151 | 0.053752365 | 0.832568254 |
| g MGYG-HGUT-03104 | g Kazachstania                 | 0.060452723  | 0.434939433 | 0.91904345  |
| g MGYG-HGUT-03104 | g Malassezia                   | 0.084683781  | 0.273654091 | 0.886311878 |
| g MGYG-HGUT-03104 | g unclassified Fungi           | -0.048005958 | 0.535387352 | 0.941323418 |
| g MGYG-HGUT-03104 | g Fusarium                     | -0.057086799 | 0.460987368 | 0.927602832 |
| g MGYG-HGUT-03104 | g Mycosphaerella               | -0.087577001 | 0.257538485 | 0.877677    |
| g MGYG-HGUT-03104 | g Simplicillium                | 0.018589218  | 0.810417841 | 0.990451053 |
| g MGYG-HGUT-03104 | g unclassified Cordycipitaceae | 0.046324958  | 0.54978915  | 0.942564508 |
| g MGYG-HGUT-03104 | g unidentified                 | -0.05483632  | 0.478874184 | 0.931740764 |
| g CAG-115         | g Verticillium                 | -0.03165754  | 0.682836121 | 0.963892039 |
| g CAG-115         | g unclassified Tremellomycetes | -0.097303467 | 0.208194483 | 0.874689648 |
| g CAG-115         | g Candida                      | -0.048442486 | 0.53167851  | 0.940412658 |
| g CAG-115         | g Cladosporium                 | 0.060224504  | 0.436678504 | 0.919176572 |
| g CAG-115         | g Debaromyces                  | -0.082169588 | 0.288202161 | 0.891214772 |
| g CAG-115         | g Aspergillus                  | -0.027985666 | 0.717961686 | 0.97067915  |
| g CAG-115         | g Kazachstania                 | -0.046803026 | 0.545674164 | 0.942564508 |
| g CAG-115         | g Malassezia                   | 0.049363332  | 0.523897327 | 0.939740222 |
| g CAG-115         | g unclassified Fungi           | -0.020299742 | 0.793348373 | 0.986710331 |
| g CAG-115         | g Fusarium                     | -0.067328003 | 0.384434037 | 0.906174944 |
| g CAG-115         | g Mycosphaerella               | -0.079725652 | 0.302830485 | 0.896894041 |
| g CAG-115         | g Simplicillium                | 0.031223233  | 0.686957192 | 0.963892039 |
| g CAG-115         | g unclassified Cordycipitaceae | 0.008945338  | 0.908105391 | 0.996251765 |
| g CAG-115         | g unidentified                 | 0.086534838  | 0.263266573 | 0.878368327 |
| g D5              | g Verticillium                 | 0.090149119  | 0.243769851 | 0.874689648 |
| g D5              | g unclassified Tremellomycetes | -0.154976206 | 0.044229399 | 0.817455693 |
| g D5              | g Candida                      | -0.003361759 | 0.965399708 | 0.998625698 |
| g D5              | g Cladosporium                 | -0.030477405 | 0.694055726 | 0.966086731 |
| g D5              | g Debaromyces                  | -0.081286391 | 0.293433132 | 0.892181547 |
| g D5              | g Aspergillus                  | 0.006981908  | 0.928213895 | 0.996251765 |
| g D5              | g Kazachstania                 | -0.023861279 | 0.758129293 | 0.981641864 |
| g D5              | g Malassezia                   | 0.134595312  | 0.081036976 | 0.8415005   |
| g D5              | g unclassified Fungi           | 0.097519229  | 0.207182861 | 0.874689648 |
| g D5              | g Fusarium                     | -0.064208478 | 0.406894242 | 0.913116876 |
| g D5              | g Mycosphaerella               | -0.043845272 | 0.571373025 | 0.942564508 |
| g D5              | g Simplicillium                | 0.014954011  | 0.84698236  | 0.994526835 |
| g D5              | g unclassified Cordycipitaceae | 0.028664482  | 0.711420732 | 0.968802592 |
| g D5              | g unidentified                 | 0.145987653  | 0.058236473 | 0.832568254 |
| g Pygmaibacter    | g Verticillium                 | 0.112414658  | 0.145624681 | 0.849249996 |

|                   |                                |              |             |             |
|-------------------|--------------------------------|--------------|-------------|-------------|
| g Pygmaibacter    | g unclassified Tremellomycetes | 0.056023007  | 0.469395915 | 0.928769554 |
| g Pygmaibacter    | g Candida                      | -0.044661745 | 0.564222256 | 0.942564508 |
| g Pygmaibacter    | g Cladosporium                 | 0.046517683  | 0.548128442 | 0.942564508 |
| g Pygmaibacter    | g Debaromyces                  | -0.133389718 | 0.083821393 | 0.8415005   |
| g Pygmaibacter    | g Aspergillus                  | 0.006840571  | 0.929663308 | 0.996251765 |
| g Pygmaibacter    | g Kazachstania                 | 0.095743786  | 0.215612849 | 0.874689648 |
| g Pygmaibacter    | g Malassezia                   | 0.009669221  | 0.900705739 | 0.995280411 |
| g Pygmaibacter    | g unclassified Fungi           | -0.031890518 | 0.68062928  | 0.963552346 |
| g Pygmaibacter    | g Fusarium                     | -0.09240425  | 0.232126826 | 0.874689648 |
| g Pygmaibacter    | g Mycosphaerella               | 0.035360482  | 0.648089874 | 0.955501166 |
| g Pygmaibacter    | g Simplicillium                | 0.018229158  | 0.814022615 | 0.991049439 |
| g Pygmaibacter    | g unclassified Cordycipitaceae | 0.093446768  | 0.226878776 | 0.874689648 |
| g Pygmaibacter    | g unidentified                 | -0.00358076  | 0.963147219 | 0.998529304 |
| g MGYG-HGUT-00450 | g Verticillium                 | 0.151543529  | 0.049204083 | 0.832568254 |
| g MGYG-HGUT-00450 | g unclassified Tremellomycetes | -0.17138681  | 0.025880227 | 0.765986149 |
| g MGYG-HGUT-00450 | g Candida                      | -0.05611106  | 0.468696743 | 0.928769554 |
| g MGYG-HGUT-00450 | g Cladosporium                 | -0.047796189 | 0.537174188 | 0.941323418 |
| g MGYG-HGUT-00450 | g Debaromyces                  | -0.076381001 | 0.323629735 | 0.899370541 |
| g MGYG-HGUT-00450 | g Aspergillus                  | -0.001051238 | 0.989177294 | 0.999049974 |
| g MGYG-HGUT-00450 | g Kazachstania                 | -0.109797503 | 0.155295192 | 0.851309232 |
| g MGYG-HGUT-00450 | g Malassezia                   | 0.138000239  | 0.07357308  | 0.8415005   |
| g MGYG-HGUT-00450 | g unclassified Fungi           | 0.08338326   | 0.281116095 | 0.8902203   |
| g MGYG-HGUT-00450 | g Fusarium                     | -0.061138766 | 0.429735588 | 0.918239588 |
| g MGYG-HGUT-00450 | g Mycosphaerella               | 0.009718418  | 0.900203138 | 0.995280411 |
| g MGYG-HGUT-00450 | g Simplicillium                | 0.147566331  | 0.055540984 | 0.832568254 |
| g MGYG-HGUT-00450 | g unclassified Cordycipitaceae | 0.10318637   | 0.181865339 | 0.872371283 |
| g MGYG-HGUT-00450 | g unidentified                 | 0.204534407  | 0.007642391 | 0.613926619 |
| g MGYG-HGUT-02037 | g Verticillium                 | -0.073736362 | 0.340713636 | 0.900151743 |
| g MGYG-HGUT-02037 | g unclassified Tremellomycetes | 0.015868791  | 0.837747055 | 0.994526835 |
| g MGYG-HGUT-02037 | g Candida                      | -0.089082319 | 0.249416962 | 0.874689648 |
| g MGYG-HGUT-02037 | g Cladosporium                 | 0.07976967   | 0.302562765 | 0.896705453 |
| g MGYG-HGUT-02037 | g Debaromyces                  | -0.076700124 | 0.321606325 | 0.988854824 |
| g MGYG-HGUT-02037 | g Aspergillus                  | 0.002918352  | 0.969961095 | 0.998625698 |
| g MGYG-HGUT-02037 | g Kazachstania                 | 0.036329131  | 0.639128082 | 0.955341199 |
| g MGYG-HGUT-02037 | g Malassezia                   | 0.041123257  | 0.595516277 | 0.94733741  |
| g MGYG-HGUT-02037 | g unclassified Fungi           | 0.085905552  | 0.266767229 | 0.878368327 |
| g MGYG-HGUT-02037 | g Fusarium                     | -0.065223805 | 0.399500258 | 0.909828919 |
| g MGYG-HGUT-02037 | g Mycosphaerella               | -0.009478266 | 0.902656904 | 0.995280411 |
| g MGYG-HGUT-02037 | g Simplicillium                | 0.019033486  | 0.805975499 | 0.989083527 |
| g MGYG-HGUT-02037 | g unclassified Cordycipitaceae | -0.007218521 | 0.925787951 | 0.996251765 |
| g MGYG-HGUT-02037 | g unidentified                 | 0.069616872  | 0.368442665 | 0.901117392 |
| g MGYG-HGUT-00537 | g Verticillium                 | 0.007741649  | 0.920426898 | 0.996251765 |
| g MGYG-HGUT-00537 | g unclassified Tremellomycetes | -0.088088716 | 0.254757519 | 0.874689648 |
| g MGYG-HGUT-00537 | g Candida                      | 0.0273111    | 0.72448205  | 0.972631421 |
| g MGYG-HGUT-00537 | g Cladosporium                 | -0.025131805 | 0.745680701 | 0.979082173 |
| g MGYG-HGUT-00537 | g Debaromyces                  | -0.019680435 | 0.799517626 | 0.987463135 |
| g MGYG-HGUT-00537 | g Aspergillus                  | -0.017747538 | 0.818850491 | 0.992339735 |
| g MGYG-HGUT-00537 | g Kazachstania                 | -0.056412205 | 0.466309862 | 0.927602832 |
| g MGYG-HGUT-00537 | g Malassezia                   | 0.136675432  | 0.076408104 | 0.8415005   |
| g MGYG-HGUT-00537 | g unclassified Fungi           | 0.060369106  | 0.435576151 | 0.919176572 |
| g MGYG-HGUT-00537 | g Fusarium                     | 0.020509335  | 0.791263378 | 0.986710331 |
| g MGYG-HGUT-00537 | g Mycosphaerella               | -0.000435212 | 0.995519291 | 0.999049974 |
| g MGYG-HGUT-00537 | g Simplicillium                | 0.059675999  | 0.440874397 | 0.920204792 |
| g MGYG-HGUT-00537 | g unclassified Cordycipitaceae | 0.003008969  | 0.969028821 | 0.998625698 |
| g MGYG-HGUT-00537 | g unidentified                 | 0.108219246  | 0.161355995 | 0.859887758 |
| g MGYG-HGUT-00425 | g Verticillium                 | 0.069185428  | 0.371425187 | 0.901117392 |
| g MGYG-HGUT-00425 | g unclassified Tremellomycetes | -0.067705334 | 0.381769208 | 0.90490297  |
| g MGYG-HGUT-00425 | g Candida                      | -0.139559777 | 0.070345624 | 0.8415005   |
| g MGYG-HGUT-00425 | g Cladosporium                 | -0.058580617 | 0.449321895 | 0.922032734 |
| g MGYG-HGUT-00425 | g Debaromyces                  | -0.141824378 | 0.065864903 | 0.836350979 |
| g MGYG-HGUT-00425 | g Aspergillus                  | 0.00171731   | 0.98232084  | 0.998625698 |
| g MGYG-HGUT-00425 | g Kazachstania                 | 0.00448607   | 0.953839135 | 0.99717368  |
| g MGYG-HGUT-00425 | g Malassezia                   | 0.115189539  | 0.135877795 | 0.849249996 |
| g MGYG-HGUT-00425 | g unclassified Fungi           | -0.048074833 | 0.534801318 | 0.941078956 |
| g MGYG-HGUT-00425 | g Fusarium                     | -0.09682669  | 0.210442464 | 0.874689648 |
| g MGYG-HGUT-00425 | g Mycosphaerella               | 0.000661183  | 0.993192863 | 0.999049974 |
| g MGYG-HGUT-00425 | g Simplicillium                | 0.052614884  | 0.496892142 | 0.935069491 |
| g MGYG-HGUT-00425 | g unclassified Cordycipitaceae | 0.018890755  | 0.807402034 | 0.989255135 |
| g MGYG-HGUT-00425 | g unidentified                 | 0.10162906   | 0.188584117 | 0.873641816 |
| g MGYG-HGUT-03299 | g Verticillium                 | 0.049539228  | 0.52241761  | 0.939740222 |
| g MGYG-HGUT-03299 | g unclassified Tremellomycetes | -0.154631962 | 0.04470851  | 0.820041176 |
| g MGYG-HGUT-03299 | g Candida                      | -0.038118007 | 0.622694429 | 0.952309753 |
| g MGYG-HGUT-03299 | g Cladosporium                 | -0.015136486 | 0.845138449 | 0.994526835 |
| g MGYG-HGUT-03299 | g Debaromyces                  | 0.056919829  | 0.462301604 | 0.927602832 |
| g MGYG-HGUT-03299 | g Aspergillus                  | -0.010863897 | 0.888512546 | 0.994639994 |
| g MGYG-HGUT-03299 | g Kazachstania                 | -0.063243138 | 0.413998674 | 0.915150306 |
| g MGYG-HGUT-03299 | g Malassezia                   | 0.041960378  | 0.58804233  | 0.947150582 |
| g MGYG-HGUT-03299 | g unclassified Fungi           | 0.083713147  | 0.279210473 | 0.889320764 |



|                   |                                |              |             |             |
|-------------------|--------------------------------|--------------|-------------|-------------|
| g MGYG-HGUT-03299 | g Fusarium                     | -0.111929564 | 0.14738175  | 0.849249996 |
| g MGYG-HGUT-03299 | g Mycosphaerella               | 0.028263556  | 0.715281474 | 0.970380158 |
| g MGYG-HGUT-03299 | g Simplicillium                | -0.036156258 | 0.640717717 | 0.955341199 |
| g MGYG-HGUT-03299 | g unclassified_Cordycipitaceae | -0.010467335 | 0.892557208 | 0.994653074 |
| g MGYG-HGUT-03299 | g unidentified                 | 0.11208984   | 0.146799444 | 0.849249996 |
| g MGYG-HGUT-01987 | g Verticillium                 | 0.090077896  | 0.244144075 | 0.874689648 |
| g MGYG-HGUT-01987 | g unclassified_Tremellomycetes | -0.082003635 | 0.289180278 | 0.891214772 |
| g MGYG-HGUT-01987 | g Candida                      | -0.094930259 | 0.219556282 | 0.874689648 |
| g MGYG-HGUT-01987 | g Cladosporium                 | 0.015549634  | 0.840966701 | 0.994526835 |
| g MGYG-HGUT-01987 | g Debaromyces                  | -0.103839757 | 0.179099427 | 0.872371283 |
| g MGYG-HGUT-01987 | g Aspergillus                  | -0.070328277 | 0.363557183 | 0.901117392 |
| g MGYG-HGUT-01987 | g Kazachstania                 | 0.025796821  | 0.739190785 | 0.97718501  |
| g MGYG-HGUT-01987 | g Malassezia                   | 0.2001288    | 0.00908571  | 0.613926619 |
| g MGYG-HGUT-01987 | g unclassified_Fungi           | 0.06431005   | 0.406150935 | 0.913116876 |
| g MGYG-HGUT-01987 | g Fusarium                     | 0.024195835  | 0.754845143 | 0.980873421 |
| g MGYG-HGUT-01987 | g Mycosphaerella               | 0.047038673  | 0.543651421 | 0.942564508 |
| g MGYG-HGUT-01987 | g Simplicillium                | -0.001779218 | 0.98168362  | 0.998625698 |
| g MGYG-HGUT-01987 | g unclassified_Cordycipitaceae | 0.074367982  | 0.336582351 | 0.900151743 |
| g MGYG-HGUT-01987 | g unidentified                 | 0.078792111  | 0.308545185 | 0.897967316 |
| g MGYG-HGUT-02221 | g Verticillium                 | 0.038340966  | 0.620659871 | 0.952309753 |
| g MGYG-HGUT-02221 | g unclassified_Tremellomycetes | -0.017894341 | 0.817378178 | 0.991841934 |
| g MGYG-HGUT-02221 | g Candida                      | -0.06129298  | 0.428570783 | 0.918239588 |
| g MGYG-HGUT-02221 | g Cladosporium                 | 0.086043252  | 0.265998515 | 0.878368327 |
| g MGYG-HGUT-02221 | g Debaromyces                  | -0.126556925 | 0.101082326 | 0.8415005   |
| g MGYG-HGUT-02221 | g Aspergillus                  | -0.014304226 | 0.853555129 | 0.994526835 |
| g MGYG-HGUT-02221 | g Kazachstania                 | 0.09782642   | 0.205748676 | 0.874689648 |
| g MGYG-HGUT-02221 | g Malassezia                   | 0.048816293  | 0.528512844 | 0.940363396 |
| g MGYG-HGUT-02221 | g unclassified_Fungi           | -0.111900287 | 0.147488308 | 0.849249996 |
| g MGYG-HGUT-02221 | g Fusarium                     | -0.046915867 | 0.544705104 | 0.942564508 |
| g MGYG-HGUT-02221 | g Mycosphaerella               | -0.086336958 | 0.264363955 | 0.878368327 |
| g MGYG-HGUT-02221 | g Simplicillium                | 0.002494519  | 0.974322034 | 0.998625698 |
| g MGYG-HGUT-02221 | g unclassified_Cordycipitaceae | 0.061276357  | 0.428696253 | 0.918239588 |
| g MGYG-HGUT-02221 | g unidentified                 | -0.018251482 | 0.813799003 | 0.991049439 |
| g MGYG-HGUT-02965 | g Verticillium                 | 0.002342461  | 0.975886795 | 0.998625698 |
| g MGYG-HGUT-02965 | g unclassified_Tremellomycetes | 0.124150612  | 0.107789694 | 0.843328451 |
| g MGYG-HGUT-02965 | g Candida                      | -0.055548197 | 0.473175914 | 0.928769554 |
| g MGYG-HGUT-02965 | g Cladosporium                 | 0.074063601  | 0.338569232 | 0.900151743 |
| g MGYG-HGUT-02965 | g Debaromyces                  | -0.082321401 | 0.28730932  | 0.891214772 |
| g MGYG-HGUT-02965 | g Aspergillus                  | -0.124881784 | 0.105715682 | 0.841929371 |
| g MGYG-HGUT-02965 | g Kazachstania                 | -0.016142735 | 0.834985644 | 0.994526835 |
| g MGYG-HGUT-02965 | g Malassezia                   | -0.017790972 | 0.818414815 | 0.992201042 |
| g MGYG-HGUT-02965 | g unclassified_Fungi           | -0.053070036 | 0.493171508 | 0.933370788 |
| g MGYG-HGUT-02965 | g Fusarium                     | -0.094437989 | 0.221967245 | 0.874689648 |
| g MGYG-HGUT-02965 | g Mycosphaerella               | -0.06551838  | 0.397370141 | 0.909588897 |
| g MGYG-HGUT-02965 | g Simplicillium                | 0.059837146  | 0.439639302 | 0.91979111  |
| g MGYG-HGUT-02965 | g unclassified_Cordycipitaceae | 0.024589413  | 0.750987218 | 0.980278684 |
| g MGYG-HGUT-02965 | g unidentified                 | 0.063691246  | 0.410691817 | 0.913242396 |
| g UBA946          | g Verticillium                 | 0.10016095   | 0.195082525 | 0.874689648 |
| g UBA946          | g unclassified_Tremellomycetes | -0.096276648 | 0.21305745  | 0.874689648 |
| g UBA946          | g Candida                      | -0.059785242 | 0.440036899 | 0.91979111  |
| g UBA946          | g Cladosporium                 | 0.073344742  | 0.34329123  | 0.900151743 |
| g UBA946          | g Debaromyces                  | -0.080458663 | 0.298392538 | 0.892181547 |
| g UBA946          | g Aspergillus                  | -0.041427562 | 0.592794433 | 0.947273049 |
| g UBA946          | g Kazachstania                 | -0.027479451 | 0.722852893 | 0.972305116 |
| g UBA946          | g Malassezia                   | 0.158073455  | 0.040108762 | 0.808354944 |
| g UBA946          | g unclassified_Fungi           | -0.027630474 | 0.721392477 | 0.971835476 |
| g UBA946          | g Fusarium                     | -0.101570664 | 0.18883954  | 0.873641816 |
| g UBA946          | g Mycosphaerella               | -0.064152981 | 0.407300713 | 0.913116876 |
| g UBA946          | g Simplicillium                | 0.089499258  | 0.247199204 | 0.874689648 |
| g UBA946          | g unclassified_Cordycipitaceae | 0.101438086  | 0.189420374 | 0.873796187 |
| g UBA946          | g unidentified                 | 0.027948395  | 0.718321424 | 0.970778853 |
| g MGYG-HGUT-02105 | g Verticillium                 | 0.004438326  | 0.954329881 | 0.99717368  |
| g MGYG-HGUT-02105 | g unclassified_Tremellomycetes | 0.033665988  | 0.663901525 | 0.959259869 |
| g MGYG-HGUT-02105 | g Candida                      | -0.055993302 | 0.469631916 | 0.928769554 |
| g MGYG-HGUT-02105 | g Cladosporium                 | 0.00513112   | 0.947210688 | 0.996925697 |
| g MGYG-HGUT-02105 | g Debaromyces                  | -0.103587929 | 0.180161767 | 0.872371283 |
| g MGYG-HGUT-02105 | g Aspergillus                  | 0.03931794   | 0.611778753 | 0.951172976 |
| g MGYG-HGUT-02105 | g Kazachstania                 | 0.058912261  | 0.446754724 | 0.921010267 |
| g MGYG-HGUT-02105 | g Malassezia                   | 0.065835205  | 0.39508672  | 0.908995032 |
| g MGYG-HGUT-02105 | g unclassified_Fungi           | 0.022683321  | 0.769726782 | 0.98374619  |
| g MGYG-HGUT-02105 | g Fusarium                     | -0.009661757 | 0.900781988 | 0.995280411 |
| g MGYG-HGUT-02105 | g Mycosphaerella               | -0.004652438 | 0.952129247 | 0.99717368  |
| g MGYG-HGUT-02105 | g Simplicillium                | 0.040761292  | 0.5987612   | 0.948266952 |
| g MGYG-HGUT-02105 | g unclassified_Cordycipitaceae | 0.065351836  | 0.398573611 | 0.909588897 |
| g MGYG-HGUT-02105 | g unidentified                 | 0.046094969  | 0.551774167 | 0.942564508 |
| g MGYG-HGUT-01725 | g Verticillium                 | -0.06875746  | 0.374398291 | 0.902314617 |
| g MGYG-HGUT-01725 | g unclassified_Tremellomycetes | 0.034154399  | 0.659328439 | 0.957193419 |
| g MGYG-HGUT-01725 | g Candida                      | 0.072998384  | 0.345581175 | 0.900151743 |

|                   |                                |              |             |             |
|-------------------|--------------------------------|--------------|-------------|-------------|
| g MGYG-HGUT-01725 | g Cladosporium                 | -0.021612093 | 0.780318045 | 0.985772094 |
| g MGYG-HGUT-01725 | g Debaryomyces                 | -0.075812952 | 0.327251768 | 0.899370541 |
| g MGYG-HGUT-01725 | g Aspergillus                  | -0.027672033 | 0.720990766 | 0.971835476 |
| g MGYG-HGUT-01725 | g Kazachstania                 | 0.035027796  | 0.651182128 | 0.955597379 |
| g MGYG-HGUT-01725 | g Malassezia                   | -0.07226645  | 0.350452009 | 0.900151743 |
| g MGYG-HGUT-01725 | g unclassified Fungi           | -0.078772574 | 0.308665529 | 0.897967316 |
| g MGYG-HGUT-01725 | g Fusarium                     | -0.060752935 | 0.432657814 | 0.918239588 |
| g MGYG-HGUT-01725 | g Mycosphaerella               | 0.061716735  | 0.425379476 | 0.918239588 |
| g MGYG-HGUT-01725 | g Simplicillium                | -0.10163341  | 0.188565104 | 0.873641816 |
| g MGYG-HGUT-01725 | g unclassified Cordycipitaceae | -0.048938485 | 0.527480094 | 0.940363396 |
| g MGYG-HGUT-01725 | g unidentified                 | -0.043283004 | 0.576322142 | 0.943618965 |
| g UBA5884         | g Verticillium                 | -0.155407546 | 0.043635139 | 0.815882315 |
| g UBA5884         | g unclassified Tremellomycetes | 0.067944196  | 0.380088112 | 0.90490297  |
| g UBA5884         | g Candida                      | 0.052121408  | 0.500942747 | 0.936281889 |
| g UBA5884         | g Cladosporium                 | 0.040650152  | 0.599759134 | 0.948957829 |
| g UBA5884         | g Debaryomyces                 | 0.011861301  | 0.878352625 | 0.994526835 |
| g UBA5884         | g Aspergillus                  | 0.034407997  | 0.656958909 | 0.956614192 |
| g UBA5884         | g Kazachstania                 | 0.039506328  | 0.610072654 | 0.951172976 |
| g UBA5884         | g Malassezia                   | -0.151102694 | 0.049875424 | 0.832568254 |
| g UBA5884         | g unclassified Fungi           | -0.020301725 | 0.793328634 | 0.986710331 |
| g UBA5884         | g Fusarium                     | -0.062346132 | 0.420664936 | 0.916661525 |
| g UBA5884         | g Mycosphaerella               | -0.000630051 | 0.99351337  | 0.999049974 |
| g UBA5884         | g Simplicillium                | -0.052082372 | 0.501263906 | 0.936281889 |
| g UBA5884         | g unclassified Cordycipitaceae | -0.146221683 | 0.057830211 | 0.832568254 |
| g UBA5884         | g unidentified                 | -0.066188517 | 0.39254963  | 0.907694413 |
| g Agathobaculum   | g Verticillium                 | -0.077478135 | 0.316707693 | 0.898525398 |
| g Agathobaculum   | g unclassified Tremellomycetes | 0.04747029   | 0.539956113 | 0.94160936  |
| g Agathobaculum   | g Candida                      | 0.00057942   | 0.994034622 | 0.999049974 |
| g Agathobaculum   | g Cladosporium                 | 0.063517255  | 0.411973947 | 0.913695764 |
| g Agathobaculum   | g Debaryomyces                 | 0.066082669  | 0.393308679 | 0.907694413 |
| g Agathobaculum   | g Aspergillus                  | -0.022329233 | 0.773223058 | 0.984510076 |
| g Agathobaculum   | g Kazachstania                 | -0.015402463 | 0.842452252 | 0.994526835 |
| g Agathobaculum   | g Malassezia                   | 0.046457981  | 0.548642634 | 0.942564508 |
| g Agathobaculum   | g unclassified Fungi           | -0.021421416 | 0.782207574 | 0.986171666 |
| g Agathobaculum   | g Fusarium                     | -0.06027007  | 0.436330964 | 0.919176572 |
| g Agathobaculum   | g Mycosphaerella               | -0.095246061 | 0.218019435 | 0.874689648 |
| g Agathobaculum   | g Simplicillium                | 0.067803535  | 0.381077532 | 0.90490297  |
| g Agathobaculum   | g unclassified Cordycipitaceae | 0.005298278  | 0.945493569 | 0.996925697 |
| g Agathobaculum   | g unidentified                 | -0.0534849   | 0.489793132 | 0.932872225 |
| g MGYG-HGUT-00220 | g Verticillium                 | 0.078846074  | 0.308212937 | 0.897967316 |
| g MGYG-HGUT-00220 | g unclassified Tremellomycetes | -0.087070978 | 0.260308967 | 0.878368327 |
| g MGYG-HGUT-00220 | g Candida                      | -0.028805656 | 0.710063018 | 0.968802592 |
| g MGYG-HGUT-00220 | g Cladosporium                 | -0.055757178 | 0.47151016  | 0.928769554 |
| g MGYG-HGUT-00220 | g Debaryomyces                 | -0.120572144 | 0.118404181 | 0.849176369 |
| g MGYG-HGUT-00220 | g Aspergillus                  | 0.022443666  | 0.77209264  | 0.984510076 |
| g MGYG-HGUT-00220 | g Kazachstania                 | -0.150522564 | 0.050770475 | 0.832568254 |
| g MGYG-HGUT-00220 | g Malassezia                   | 0.045714984  | 0.555061417 | 0.942564508 |
| g MGYG-HGUT-00220 | g unclassified Fungi           | 0.016303121  | 0.833369861 | 0.994526835 |
| g MGYG-HGUT-00220 | g Fusarium                     | -0.051673861 | 0.504631288 | 0.936546622 |
| g MGYG-HGUT-00220 | g Mycosphaerella               | -0.013672305 | 0.859956867 | 0.994526835 |
| g MGYG-HGUT-00220 | g Simplicillium                | 0.099353804  | 0.198723846 | 0.874689648 |
| g MGYG-HGUT-00220 | g unclassified Cordycipitaceae | 0.004217097  | 0.956604033 | 0.99717368  |
| g MGYG-HGUT-00220 | g unidentified                 | 0.160913918  | 0.036618238 | 0.808354944 |
| g UBA4644         | g Verticillium                 | 0.020631612  | 0.790047674 | 0.986710331 |
| g UBA4644         | g unclassified Tremellomycetes | -0.209538027 | 0.006253236 | 0.613926619 |
| g UBA4644         | g Candida                      | -0.023365681 | 0.763002257 | 0.982076388 |
| g UBA4644         | g Cladosporium                 | -0.019572075 | 0.800598346 | 0.987523813 |
| g UBA4644         | g Debaryomyces                 | -0.052460792 | 0.49815512  | 0.935854029 |
| g UBA4644         | g Aspergillus                  | -0.02455843  | 0.751290695 | 0.980278684 |
| g UBA4644         | g Kazachstania                 | -0.049598766 | 0.521917231 | 0.939740222 |
| g UBA4644         | g Malassezia                   | 0.122308903  | 0.113155351 | 0.843328451 |
| g UBA4644         | g unclassified Fungi           | 0.052265032  | 0.499762052 | 0.936281889 |
| g UBA4644         | g Fusarium                     | -0.051877694 | 0.502949604 | 0.936281889 |
| g UBA4644         | g Mycosphaerella               | -0.093837637 | 0.224932917 | 0.874689648 |
| g UBA4644         | g Simplicillium                | 0.148058224  | 0.054722468 | 0.832568254 |
| g UBA4644         | g unclassified Cordycipitaceae | -0.011502283 | 0.882007513 | 0.994526835 |
| g UBA4644         | g unidentified                 | 0.122490613  | 0.112616856 | 0.843328451 |
| g Butyricoccus    | g Verticillium                 | 0.022106286  | 0.775426785 | 0.984510076 |
| g Butyricoccus    | g unclassified Tremellomycetes | 0.021387351  | 0.782545281 | 0.986171666 |
| g Butyricoccus    | g Candida                      | -0.005310441 | 0.945368632 | 0.996925697 |
| g Butyricoccus    | g Cladosporium                 | 0.023006337  | 0.76654135  | 0.982494893 |
| g Butyricoccus    | g Debaryomyces                 | -0.045297919 | 0.558680328 | 0.942564508 |
| g Butyricoccus    | g Aspergillus                  | 0.03804377   | 0.623372491 | 0.952309753 |
| g Butyricoccus    | g Kazachstania                 | 0.06267735   | 0.418196192 | 0.916661525 |
| g Butyricoccus    | g Malassezia                   | 0.006186488  | 0.936373884 | 0.996251765 |
| g Butyricoccus    | g unclassified Fungi           | -0.002486859 | 0.974400854 | 0.998625698 |
| g Butyricoccus    | g Fusarium                     | 0.140690021  | 0.068079296 | 0.836350979 |
| g Butyricoccus    | g Mycosphaerella               | 0.069949449  | 0.366153717 | 0.901117392 |

|                   |                                |              |             |             |
|-------------------|--------------------------------|--------------|-------------|-------------|
| g Butyricoccus    | g Simplicillium                | 0.084840924  | 0.272761621 | 0.88516315  |
| g Butyricoccus    | g unclassified Cordycipitaceae | 0.077384762  | 0.317293031 | 0.898525398 |
| g Butyricoccus    | g unidentified                 | 0.116604523  | 0.131103796 | 0.849249996 |
| g Butyricoccus_A  | g Verticillium                 | -0.04476172  | 0.563349602 | 0.942564508 |
| g Butyricoccus_A  | g unclassified Tremellomycetes | -0.058691751 | 0.448460708 | 0.922032734 |
| g Butyricoccus_A  | g Candida                      | -0.027993842 | 0.71788278  | 0.97067915  |
| g Butyricoccus_A  | g Cladosporium                 | 0.005361777  | 0.944841346 | 0.996925697 |
| g Butyricoccus_A  | g Debaromyces                  | 0.083585654  | 0.279945914 | 0.889387397 |
| g Butyricoccus_A  | g Aspergillus                  | -0.08803824  | 0.255030908 | 0.874689648 |
| g Butyricoccus_A  | g Kazachstania                 | -0.084650267 | 0.273844685 | 0.886311878 |
| g Butyricoccus_A  | g Malassezia                   | 0.029098837  | 0.70724634  | 0.96831002  |
| g Butyricoccus_A  | g unclassified Fungi           | -0.00501691  | 0.948384045 | 0.996925697 |
| g Butyricoccus_A  | g Fusarium                     | 0.008356387  | 0.914131609 | 0.996251765 |
| g Butyricoccus_A  | g Mycosphaerella               | -0.120881807 | 0.117454707 | 0.849176369 |
| g Butyricoccus_A  | g Simplicillium                | 0.028336799  | 0.71457564  | 0.970380158 |
| g Butyricoccus_A  | g unclassified Cordycipitaceae | -0.038451144 | 0.61965552  | 0.952309753 |
| g Butyricoccus_A  | g unidentified                 | 0.026978279  | 0.727706451 | 0.972962464 |
| g MGYG-HGUT-04122 | g Verticillium                 | -0.031694903 | 0.682482022 | 0.963892039 |
| g MGYG-HGUT-04122 | g unclassified Tremellomycetes | 0.012592593  | 0.870915917 | 0.994526835 |
| g MGYG-HGUT-04122 | g Candida                      | -0.038622788 | 0.618092277 | 0.952309753 |
| g MGYG-HGUT-04122 | g Cladosporium                 | 0.017626505  | 0.820064841 | 0.992484281 |
| g MGYG-HGUT-04122 | g Debaromyces                  | -0.021223358 | 0.784171599 | 0.986469481 |
| g MGYG-HGUT-04122 | g Aspergillus                  | -0.037018288 | 0.632771237 | 0.954068873 |
| g MGYG-HGUT-04122 | g Kazachstania                 | 0.078292519  | 0.31163229  | 0.897967316 |
| g MGYG-HGUT-04122 | g Malassezia                   | -0.008342663 | 0.914272087 | 0.996251765 |
| g MGYG-HGUT-04122 | g unclassified Fungi           | -0.056055771 | 0.469135687 | 0.928769554 |
| g MGYG-HGUT-04122 | g Fusarium                     | 0.059632628  | 0.441207146 | 0.920204792 |
| g MGYG-HGUT-04122 | g Mycosphaerella               | -0.006366864 | 0.934522843 | 0.996251765 |
| g MGYG-HGUT-04122 | g Simplicillium                | 0.089194628  | 0.248818222 | 0.874689648 |
| g MGYG-HGUT-04122 | g unclassified Cordycipitaceae | -0.00566597  | 0.941717365 | 0.996925697 |
| g MGYG-HGUT-04122 | g unidentified                 | 0.121328157  | 0.116096564 | 0.845388238 |
| g MGYG-HGUT-02604 | g Verticillium                 | 0.081513804  | 0.29208022  | 0.892181547 |
| g MGYG-HGUT-02604 | g unclassified Tremellomycetes | 0.039818832  | 0.607247151 | 0.950933357 |
| g MGYG-HGUT-02604 | g Candida                      | -0.002165484 | 0.977708097 | 0.998625698 |
| g MGYG-HGUT-02604 | g Cladosporium                 | 0.067111636  | 0.385967166 | 0.906174944 |
| g MGYG-HGUT-02604 | g Debaromyces                  | -0.140196127 | 0.069062207 | 0.836518447 |
| g MGYG-HGUT-02604 | g Aspergillus                  | 0.053250335  | 0.491701748 | 0.933231913 |
| g MGYG-HGUT-02604 | g Kazachstania                 | 0.096799592  | 0.210570751 | 0.874689648 |
| g MGYG-HGUT-02604 | g Malassezia                   | -0.025309437 | 0.743945413 | 0.978404143 |
| g MGYG-HGUT-02604 | g unclassified Fungi           | -0.016754519 | 0.82882608  | 0.993650851 |
| g MGYG-HGUT-02604 | g Fusarium                     | -0.141442246 | 0.066604202 | 0.836350979 |
| g MGYG-HGUT-02604 | g Mycosphaerella               | 0.13122405   | 0.08901557  | 0.8415005   |
| g MGYG-HGUT-02604 | g Simplicillium                | 0.053330172  | 0.491051686 | 0.932872225 |
| g MGYG-HGUT-02604 | g unclassified Cordycipitaceae | 0.060589905  | 0.433895989 | 0.918239588 |
| g MGYG-HGUT-02604 | g unidentified                 | -0.021293627 | 0.783474624 | 0.986399684 |
| g CAG-272         | g Verticillium                 | 0.160204625  | 0.037464903 | 0.808354944 |
| g CAG-272         | g unclassified Tremellomycetes | -0.127584599 | 0.098320145 | 0.8415005   |
| g CAG-272         | g Candida                      | -0.090942195 | 0.239629801 | 0.874689648 |
| g CAG-272         | g Cladosporium                 | 0.07172794   | 0.354063065 | 0.900151743 |
| g CAG-272         | g Debaromyces                  | -0.18215335  | 0.017774431 | 0.702895198 |
| g CAG-272         | g Aspergillus                  | 0.013432957  | 0.862384016 | 0.994526835 |
| g CAG-272         | g Kazachstania                 | -0.112638618 | 0.144818851 | 0.849249996 |
| g CAG-272         | g Malassezia                   | 0.050508018  | 0.514306018 | 0.938486417 |
| g CAG-272         | g unclassified Fungi           | 0.000519563  | 0.994650866 | 0.999049974 |
| g CAG-272         | g Fusarium                     | -0.127533294 | 0.09845661  | 0.8415005   |
| g CAG-272         | g Mycosphaerella               | -0.086280517 | 0.264677535 | 0.878368327 |
| g CAG-272         | g Simplicillium                | 0.192437234  | 0.012190179 | 0.659702633 |
| g CAG-272         | g unclassified Cordycipitaceae | 0.050301505  | 0.516029679 | 0.938796978 |
| g CAG-272         | g unidentified                 | 0.063286231  | 0.413679991 | 0.915150306 |
| g CAG-841         | g Verticillium                 | -0.022975869 | 0.766841644 | 0.982494893 |
| g CAG-841         | g unclassified Tremellomycetes | -0.173121553 | 0.024391826 | 0.765986149 |
| g CAG-841         | g Candida                      | -0.02720084  | 0.725549724 | 0.972631421 |
| g CAG-841         | g Cladosporium                 | -0.097636449 | 0.206634753 | 0.874689648 |
| g CAG-841         | g Debaromyces                  | -0.042578316 | 0.58255301  | 0.944873255 |
| g CAG-841         | g Aspergillus                  | -0.030606393 | 0.692826136 | 0.966086731 |
| g CAG-841         | g Kazachstania                 | -0.059942413 | 0.438833556 | 0.91979111  |
| g CAG-841         | g Malassezia                   | 0.089078706  | 0.249436242 | 0.874689648 |
| g CAG-841         | g unclassified Fungi           | -0.003207188 | 0.966989678 | 0.998625698 |
| g CAG-841         | g Fusarium                     | -0.10258665  | 0.184431597 | 0.873641816 |
| g CAG-841         | g Mycosphaerella               | -0.065725723 | 0.395874887 | 0.909025558 |
| g CAG-841         | g Simplicillium                | 0.112147116  | 0.146591773 | 0.849249996 |
| g CAG-841         | g unclassified Cordycipitaceae | -0.08640813  | 0.263968896 | 0.878368327 |
| g CAG-841         | g unidentified                 | 0.153387709  | 0.046476557 | 0.828771778 |
| g MGYG-HGUT-00386 | g Verticillium                 | 0.103372263  | 0.181075241 | 0.872371283 |
| g MGYG-HGUT-00386 | g unclassified Tremellomycetes | -0.082551355 | 0.285960444 | 0.891214772 |
| g MGYG-HGUT-00386 | g Candida                      | -0.067072773 | 0.386242931 | 0.906174944 |
| g MGYG-HGUT-00386 | g Cladosporium                 | 0.135241648  | 0.079575137 | 0.8415005   |
| g MGYG-HGUT-00386 | g Debaromyces                  | -0.043982044 | 0.570172179 | 0.942564508 |

|                   |                                |              |             |             |
|-------------------|--------------------------------|--------------|-------------|-------------|
| g MGYG-HGUT-00386 | g Aspergillus                  | -0.088575865 | 0.252129351 | 0.874689648 |
| g MGYG-HGUT-00386 | g Kazachstania                 | -0.046394114 | 0.549192952 | 0.942564508 |
| g MGYG-HGUT-00386 | g Malassezia                   | 0.085305082  | 0.270137043 | 0.881811135 |
| g MGYG-HGUT-00386 | g unclassified_Fungi           | 0.007956766  | 0.918223383 | 0.996251765 |
| g MGYG-HGUT-00386 | g Fusarium                     | -0.106530516 | 0.168035236 | 0.864987015 |
| g MGYG-HGUT-00386 | g Mycosphaerella               | -0.015893225 | 0.837500672 | 0.994526835 |
| g MGYG-HGUT-00386 | g Simplicillium                | 0.099020248  | 0.200242926 | 0.874689648 |
| g MGYG-HGUT-00386 | g unclassified_Cordycipitaceae | -0.004228622 | 0.956485548 | 0.99717368  |
| g MGYG-HGUT-00386 | g unidentified                 | 0.127961205  | 0.097322991 | 0.8415005   |
| g CAG-724         | g Verticillium                 | -0.00627813  | 0.935433398 | 0.996251765 |
| g CAG-724         | g unclassified_Tremellomycetes | -0.07151071  | 0.355526302 | 0.900151743 |
| g CAG-724         | g Candida                      | -0.037805854 | 0.625547706 | 0.952517435 |
| g CAG-724         | g Cladosporium                 | 0.003314278  | 0.9658881   | 0.998625698 |
| g CAG-724         | g Debaryomyces                 | -0.03018894  | 0.69680843  | 0.967127531 |
| g CAG-724         | g Aspergillus                  | -0.040181014 | 0.60397976  | 0.950399198 |
| g CAG-724         | g Kazachstania                 | -0.137595289 | 0.07443046  | 0.8415005   |
| g CAG-724         | g Malassezia                   | 0.012217065  | 0.874733397 | 0.994526835 |
| g CAG-724         | g unclassified_Fungi           | -0.090519644 | 0.241829462 | 0.874689648 |
| g CAG-724         | g Fusarium                     | -0.086613416 | 0.262831667 | 0.878368327 |
| g CAG-724         | g Mycosphaerella               | -0.156539374 | 0.04210751  | 0.808354944 |
| g CAG-724         | g Simplicillium                | 0.178769201  | 0.020044333 | 0.711265457 |
| g CAG-724         | g unclassified_Cordycipitaceae | 0.002678909  | 0.97242469  | 0.998625698 |
| g CAG-724         | g unidentified                 | -0.006158576 | 0.936660348 | 0.996251765 |
| g CAG-448         | g Verticillium                 | 0.021446195  | 0.781961951 | 0.986171666 |
| g CAG-448         | g unclassified_Tremellomycetes | -0.156565498 | 0.042072787 | 0.808354944 |
| g CAG-448         | g Candida                      | -0.05166378  | 0.504714537 | 0.936546622 |
| g CAG-448         | g Cladosporium                 | -0.04128571  | 0.594062517 | 0.947273049 |
| g CAG-448         | g Debaryomyces                 | -0.080470068 | 0.29832383  | 0.892181547 |
| g CAG-448         | g Aspergillus                  | -0.110950282 | 0.150977703 | 0.84984956  |
| g CAG-448         | g Kazachstania                 | -0.08051861  | 0.298031506 | 0.892181547 |
| g CAG-448         | g Malassezia                   | 0.012457011  | 0.872293861 | 0.994526835 |
| g CAG-448         | g unclassified_Fungi           | -0.034198742 | 0.658913872 | 0.956966684 |
| g CAG-448         | g Fusarium                     | 0.067798659  | 0.381111853 | 0.90490297  |
| g CAG-448         | g Mycosphaerella               | -0.061813714 | 0.424651061 | 0.918239588 |
| g CAG-448         | g Simplicillium                | 0.038872832  | 0.615818067 | 0.95208495  |
| g CAG-448         | g unclassified_Cordycipitaceae | 0.02204986   | 0.775984818 | 0.984510076 |
| g CAG-448         | g unidentified                 | 0.102115117  | 0.186467907 | 0.873641816 |
| g CAG-390         | g Verticillium                 | 0.025220265  | 0.744816376 | 0.978592408 |
| g CAG-390         | g unclassified_Tremellomycetes | -0.162242979 | 0.035075234 | 0.808354944 |
| g CAG-390         | g Candida                      | -0.061472045 | 0.427220559 | 0.918239588 |
| g CAG-390         | g Cladosporium                 | -0.067500905 | 0.383211554 | 0.905460587 |
| g CAG-390         | g Debaryomyces                 | -0.007958644 | 0.918204149 | 0.996251765 |
| g CAG-390         | g Aspergillus                  | -0.061757692 | 0.425071757 | 0.918239588 |
| g CAG-390         | g Kazachstania                 | -0.021397704 | 0.782442636 | 0.986171666 |
| g CAG-390         | g Malassezia                   | 0.02369699   | 0.759743622 | 0.982076388 |
| g CAG-390         | g unclassified_Fungi           | -0.004865538 | 0.949939365 | 0.99717368  |
| g CAG-390         | g Fusarium                     | -0.099267805 | 0.199114704 | 0.874689648 |
| g CAG-390         | g Mycosphaerella               | -0.102994922 | 0.182681695 | 0.872371283 |
| g CAG-390         | g Simplicillium                | 0.156571512  | 0.042064796 | 0.808354944 |
| g CAG-390         | g unclassified_Cordycipitaceae | -0.024639095 | 0.750500662 | 0.980278684 |
| g CAG-390         | g unidentified                 | 0.088366432  | 0.253256937 | 0.874689648 |
| g MGYG-HGUT-02723 | g Verticillium                 | 0.001082669  | 0.98885372  | 0.999049974 |
| g MGYG-HGUT-02723 | g unclassified_Tremellomycetes | -0.103884176 | 0.178912524 | 0.872371283 |
| g MGYG-HGUT-02723 | g Candida                      | -0.02229316  | 0.773579496 | 0.984510076 |
| g MGYG-HGUT-02723 | g Cladosporium                 | 0.08147668   | 0.292300793 | 0.892181547 |
| g MGYG-HGUT-02723 | g Debaryomyces                 | -0.037933626 | 0.624379113 | 0.952309753 |
| g MGYG-HGUT-02723 | g Aspergillus                  | -0.086004773 | 0.266213173 | 0.878368327 |
| g MGYG-HGUT-02723 | g Kazachstania                 | -0.095868157 | 0.215014465 | 0.874689648 |
| g MGYG-HGUT-02723 | g Malassezia                   | 0.11784734   | 0.127017935 | 0.849249996 |
| g MGYG-HGUT-02723 | g unclassified_Fungi           | 0.061404282  | 0.42773123  | 0.918239588 |
| g MGYG-HGUT-02723 | g Fusarium                     | 0.006968632  | 0.928350025 | 0.996251765 |
| g MGYG-HGUT-02723 | g Mycosphaerella               | -0.062427413 | 0.420058321 | 0.916661525 |
| g MGYG-HGUT-02723 | g Simplicillium                | 0.096367482  | 0.212624018 | 0.874689648 |
| g MGYG-HGUT-02723 | g unclassified_Cordycipitaceae | 0.009971106  | 0.897622305 | 0.995280411 |
| g MGYG-HGUT-02723 | g unidentified                 | 0.113026224  | 0.143432216 | 0.849249996 |
| g QALR01          | g Verticillium                 | 0.048909723  | 0.527723092 | 0.940363396 |
| g QALR01          | g unclassified_Tremellomycetes | -0.078586396 | 0.309813913 | 0.897967316 |
| g QALR01          | g Candida                      | -0.135241655 | 0.07957512  | 0.8415005   |
| g QALR01          | g Cladosporium                 | 0.014015119  | 0.856482793 | 0.994526835 |
| g QALR01          | g Debaryomyces                 | -0.095715949 | 0.215746944 | 0.874689648 |
| g QALR01          | g Aspergillus                  | -0.139740322 | 0.069979539 | 0.8415005   |
| g QALR01          | g Kazachstania                 | 0.066123059  | 0.393018933 | 0.907694413 |
| g QALR01          | g Malassezia                   | 0.114030565  | 0.13988622  | 0.849249996 |
| g QALR01          | g unclassified_Fungi           | -0.146903539 | 0.05665984  | 0.832568254 |
| g QALR01          | g Fusarium                     | -0.087200528 | 0.259597742 | 0.878368327 |
| g QALR01          | g Mycosphaerella               | -0.074634911 | 0.334846063 | 0.900151743 |
| g QALR01          | g Simplicillium                | 0.098549087  | 0.202402977 | 0.874689648 |
| g QALR01          | g unclassified_Cordycipitaceae | 0.013773469  | 0.858931392 | 0.994526835 |



|                   |                                |              |             |             |
|-------------------|--------------------------------|--------------|-------------|-------------|
| g QALR01          | g unidentified                 | -0.013409242 | 0.862624576 | 0.994526835 |
| g Firm-07         | g Verticillium                 | 0.007401248  | 0.923914957 | 0.996251765 |
| g Firm-07         | g unclassified Tremellomycetes | -0.095318072 | 0.21767007  | 0.874689648 |
| g Firm-07         | g Candida                      | -0.074551917 | 0.335385299 | 0.900151743 |
| g Firm-07         | g Cladosporium                 | -0.029301899 | 0.705297786 | 0.967508066 |
| g Firm-07         | g Debaromyces                  | -0.061342117 | 0.428200027 | 0.918239588 |
| g Firm-07         | g Aspergillus                  | -0.023324425 | 0.763408333 | 0.982076388 |
| g Firm-07         | g Kazachstania                 | -0.045536126 | 0.556611998 | 0.942564508 |
| g Firm-07         | g Malassezia                   | 0.038156058  | 0.622346997 | 0.952309753 |
| g Firm-07         | g unclassified Fungi           | -0.03608553  | 0.641371542 | 0.955341199 |
| g Firm-07         | g Fusarium                     | 0.016028993  | 0.83613194  | 0.994526835 |
| g Firm-07         | g Mycosphaerella               | -0.036523867 | 0.637323909 | 0.954338328 |
| g Firm-07         | g Simplicillium                | 0.201036947  | 0.00876986  | 0.613926619 |
| g Firm-07         | g unclassified Cordycipitaceae | -0.03838633  | 0.620246259 | 0.952309753 |
| g Firm-07         | g unidentified                 | 0.182981759  | 0.017254047 | 0.702895198 |
| g MGYG-HGUT-04098 | g Verticillium                 | 0.019014164  | 0.806168581 | 0.989092622 |
| g MGYG-HGUT-04098 | g unclassified Tremellomycetes | -0.110184514 | 0.15383549  | 0.85006873  |
| g MGYG-HGUT-04098 | g Candida                      | -0.012114715 | 0.875774357 | 0.994526835 |
| g MGYG-HGUT-04098 | g Cladosporium                 | -0.039031328 | 0.614378405 | 0.951172976 |
| g MGYG-HGUT-04098 | g Debaromyces                  | -0.058213034 | 0.452176913 | 0.923868417 |
| g MGYG-HGUT-04098 | g Aspergillus                  | 0.082679638  | 0.285209806 | 0.891214772 |
| g MGYG-HGUT-04098 | g Kazachstania                 | -0.065996372 | 0.393928184 | 0.907694413 |
| g MGYG-HGUT-04098 | g Malassezia                   | 0.058130159  | 0.452822007 | 0.923868417 |
| g MGYG-HGUT-04098 | g unclassified Fungi           | -0.041235031 | 0.594515863 | 0.947273049 |
| g MGYG-HGUT-04098 | g Fusarium                     | -0.033398324 | 0.666412997 | 0.959776195 |
| g MGYG-HGUT-04098 | g Mycosphaerella               | -0.119611571 | 0.121387418 | 0.849176369 |
| g MGYG-HGUT-04098 | g Simplicillium                | 0.054923891  | 0.478171222 | 0.931740764 |
| g MGYG-HGUT-04098 | g unclassified Cordycipitaceae | -0.039241977 | 0.612467289 | 0.951172976 |
| g MGYG-HGUT-04098 | g unidentified                 | 0.124071267  | 0.108016669 | 0.843328451 |
| g MGYG-HGUT-04035 | g Verticillium                 | -0.002727335 | 0.971926417 | 0.998625698 |
| g MGYG-HGUT-04035 | g unclassified Tremellomycetes | -0.019938782 | 0.796942556 | 0.987463135 |
| g MGYG-HGUT-04035 | g Candida                      | -0.104197097 | 0.177599912 | 0.872371283 |
| g MGYG-HGUT-04035 | g Cladosporium                 | 0.124860947  | 0.105774351 | 0.841929371 |
| g MGYG-HGUT-04035 | g Debaromyces                  | -0.06217291  | 0.421959428 | 0.916999262 |
| g MGYG-HGUT-04035 | g Aspergillus                  | -0.052592025 | 0.497079392 | 0.935069491 |
| g MGYG-HGUT-04035 | g Kazachstania                 | -0.04074462  | 0.598910853 | 0.948266952 |
| g MGYG-HGUT-04035 | g Malassezia                   | 0.063802894  | 0.409870326 | 0.913116876 |
| g MGYG-HGUT-04035 | g unclassified Fungi           | 0.096006953  | 0.214348082 | 0.874689648 |
| g MGYG-HGUT-04035 | g Fusarium                     | -0.082906664 | 0.283884613 | 0.8902203   |
| g MGYG-HGUT-04035 | g Mycosphaerella               | -0.060054164 | 0.437979105 | 0.919726905 |
| g MGYG-HGUT-04035 | g Simplicillium                | 0.090746495  | 0.240646804 | 0.874689648 |
| g MGYG-HGUT-04035 | g unclassified Cordycipitaceae | 0.011253381  | 0.884542869 | 0.994526835 |
| g MGYG-HGUT-04035 | g unidentified                 | 0.093660761  | 0.225811986 | 0.874689648 |
| g MGYG-HGUT-01133 | g Verticillium                 | -0.037979566 | 0.623959181 | 0.952309753 |
| g MGYG-HGUT-01133 | g unclassified Tremellomycetes | 0.06195601   | 0.423583578 | 0.918013177 |
| g MGYG-HGUT-01133 | g Candida                      | -0.130323741 | 0.091249136 | 0.8415005   |
| g MGYG-HGUT-01133 | g Cladosporium                 | 0.027992432  | 0.717896385 | 0.97067915  |
| g MGYG-HGUT-01133 | g Debaromyces                  | -0.060196464 | 0.436892441 | 0.919176572 |
| g MGYG-HGUT-01133 | g Aspergillus                  | -0.063499328 | 0.412106185 | 0.913744692 |
| g MGYG-HGUT-01133 | g Kazachstania                 | 0.038841547  | 0.616102419 | 0.952145859 |
| g MGYG-HGUT-01133 | g Malassezia                   | -0.017774416 | 0.818580879 | 0.992201042 |
| g MGYG-HGUT-01133 | g unclassified Fungi           | -0.027028293 | 0.727221599 | 0.972650982 |
| g MGYG-HGUT-01133 | g Fusarium                     | 0.008571621  | 0.911928718 | 0.996251765 |
| g MGYG-HGUT-01133 | g Mycosphaerella               | -0.039555998 | 0.609623179 | 0.951110791 |
| g MGYG-HGUT-01133 | g Simplicillium                | 0.096969248  | 0.209768496 | 0.874689648 |
| g MGYG-HGUT-01133 | g unclassified Cordycipitaceae | -0.005459223 | 0.94384051  | 0.99625697  |
| g MGYG-HGUT-01133 | g unidentified                 | 0.099546853  | 0.197848487 | 0.874689648 |
| g MGYG-HGUT-04214 | g Verticillium                 | 0.018260216  | 0.813711517 | 0.991049439 |
| g MGYG-HGUT-04214 | g unclassified Tremellomycetes | -0.188008685 | 0.01437144  | 0.702895198 |
| g MGYG-HGUT-04214 | g Candida                      | -0.04187821  | 0.588774032 | 0.947252808 |
| g MGYG-HGUT-04214 | g Cladosporium                 | -0.024387498 | 0.752965657 | 0.980305754 |
| g MGYG-HGUT-04214 | g Debaromyces                  | -0.089141922 | 0.249099085 | 0.874689648 |
| g MGYG-HGUT-04214 | g Aspergillus                  | -0.003131886 | 0.96776431  | 0.998625698 |
| g MGYG-HGUT-04214 | g Kazachstania                 | -0.032694099 | 0.673038363 | 0.961662062 |
| g MGYG-HGUT-04214 | g Malassezia                   | 0.062335431  | 0.420744839 | 0.916661525 |
| g MGYG-HGUT-04214 | g unclassified Fungi           | 0.032781936  | 0.672210605 | 0.96129685  |
| g MGYG-HGUT-04214 | g Fusarium                     | -0.071778452 | 0.353723362 | 0.900151743 |
| g MGYG-HGUT-04214 | g Mycosphaerella               | -0.079857652 | 0.302028108 | 0.896412022 |
| g MGYG-HGUT-04214 | g Simplicillium                | 0.113897395  | 0.140352517 | 0.849249996 |
| g MGYG-HGUT-04214 | g unclassified Cordycipitaceae | -0.033426947 | 0.66614426  | 0.959776195 |
| g MGYG-HGUT-04214 | g unidentified                 | 0.134692554  | 0.080815671 | 0.8415005   |
| g MGYG-HGUT-02123 | g Verticillium                 | 0.034389594  | 0.657130744 | 0.956614192 |
| g MGYG-HGUT-02123 | g unclassified Tremellomycetes | -0.133535253 | 0.083481248 | 0.8415005   |
| g MGYG-HGUT-02123 | g Candida                      | -0.025634763 | 0.740770643 | 0.977217936 |
| g MGYG-HGUT-02123 | g Cladosporium                 | 0.022357636  | 0.772942431 | 0.984510076 |
| g MGYG-HGUT-02123 | g Debaromyces                  | 0.011387796  | 0.883173552 | 0.994526835 |
| g MGYG-HGUT-02123 | g Aspergillus                  | -0.006650634 | 0.931611484 | 0.996251765 |
| g MGYG-HGUT-02123 | g Kazachstania                 | -0.029083542 | 0.707393186 | 0.96831002  |

|                   |                                |              |             |             |
|-------------------|--------------------------------|--------------|-------------|-------------|
| g MGYG-HGUT-02123 | g Malassezia                   | 0.086574805  | 0.263045307 | 0.878368327 |
| g MGYG-HGUT-02123 | g unclassified Fungi           | 0.171652371  | 0.025647452 | 0.765986149 |
| g MGYG-HGUT-02123 | g Fusarium                     | 0.038931294  | 0.615286873 | 0.951817018 |
| g MGYG-HGUT-02123 | g Mycosphaerella               | -0.057565976 | 0.457227225 | 0.924332119 |
| g MGYG-HGUT-02123 | g Simplicillium                | 0.129823485  | 0.092509378 | 0.8415005   |
| g MGYG-HGUT-02123 | g unclassified Cordycipitaceae | 0.000812363  | 0.991636452 | 0.999049974 |
| g MGYG-HGUT-02123 | g unidentified                 | 0.14031096   | 0.068832651 | 0.836518447 |
| g MGYG-HGUT-03979 | g Verticillium                 | 0.101245392  | 0.190266904 | 0.87463999  |
| g MGYG-HGUT-03979 | g unclassified Tremellomycetes | -0.155787747 | 0.043116888 | 0.812441332 |
| g MGYG-HGUT-03979 | g Candida                      | -0.035017191 | 0.6512808   | 0.955597379 |
| g MGYG-HGUT-03979 | g Cladosporium                 | 0.019721287  | 0.799110288 | 0.987463135 |
| g MGYG-HGUT-03979 | g Debaromyces                  | -0.127617262 | 0.098233343 | 0.8415005   |
| g MGYG-HGUT-03979 | g Aspergillus                  | -0.006496345 | 0.93319431  | 0.996251765 |
| g MGYG-HGUT-03979 | g Kazachstania                 | -0.05124114  | 0.508211089 | 0.936546622 |
| g MGYG-HGUT-03979 | g Malassezia                   | 0.144686766  | 0.06053778  | 0.832568254 |
| g MGYG-HGUT-03979 | g unclassified Fungi           | 0.002331968  | 0.975994773 | 0.998625698 |
| g MGYG-HGUT-03979 | g Fusarium                     | -0.070906423 | 0.359616563 | 0.900151743 |
| g MGYG-HGUT-03979 | g Mycosphaerella               | -0.061867574 | 0.424246831 | 0.918239588 |
| g MGYG-HGUT-03979 | g Simplicillium                | 0.117123819  | 0.129384453 | 0.849249996 |
| g MGYG-HGUT-03979 | g unclassified Cordycipitaceae | -0.007103952 | 0.92696252  | 0.996251765 |
| g MGYG-HGUT-03979 | g unidentified                 | 0.133979808  | 0.08244909  | 0.8415005   |
| g MGYG-HGUT-03973 | g Verticillium                 | 0.051147429  | 0.50898807  | 0.937011504 |
| g MGYG-HGUT-03973 | g unclassified Tremellomycetes | -0.147912603 | 0.054963737 | 0.832568254 |
| g MGYG-HGUT-03973 | g Candida                      | -0.04306816  | 0.578218497 | 0.944017669 |
| g MGYG-HGUT-03973 | g Cladosporium                 | -0.023003944 | 0.766564937 | 0.982494893 |
| g MGYG-HGUT-03973 | g Debaromyces                  | -0.058446135 | 0.450365239 | 0.922733665 |
| g MGYG-HGUT-03973 | g Aspergillus                  | -0.034621581 | 0.654965906 | 0.956614192 |
| g MGYG-HGUT-03973 | g Kazachstania                 | -0.081842635 | 0.290131317 | 0.892181547 |
| g MGYG-HGUT-03973 | g Malassezia                   | 0.136049814  | 0.077777252 | 0.8415005   |
| g MGYG-HGUT-03973 | g unclassified Fungi           | 0.058609012  | 0.449101773 | 0.922032734 |
| g MGYG-HGUT-03973 | g Fusarium                     | 0.032275073  | 0.676992571 | 0.962963695 |
| g MGYG-HGUT-03973 | g Mycosphaerella               | -0.004610044 | 0.952564934 | 0.99717368  |
| g MGYG-HGUT-03973 | g Simplicillium                | 0.166831763  | 0.030163758 | 0.785763434 |
| g MGYG-HGUT-03973 | g unclassified Cordycipitaceae | -0.010153621 | 0.895758855 | 0.995135868 |
| g MGYG-HGUT-03973 | g unidentified                 | 0.16703407   | 0.029961436 | 0.785763434 |
| g MGYG-HGUT-02047 | g Verticillium                 | -0.072530488 | 0.34868995  | 0.900151743 |
| g MGYG-HGUT-02047 | g unclassified Tremellomycetes | -0.153894641 | 0.045749304 | 0.825673201 |
| g MGYG-HGUT-02047 | g Candida                      | 0.004082418  | 0.957988653 | 0.997257748 |
| g MGYG-HGUT-02047 | g Cladosporium                 | -0.050425368 | 0.514995503 | 0.938796978 |
| g MGYG-HGUT-02047 | g Debaromyces                  | -0.106407152 | 0.168531111 | 0.864987015 |
| g MGYG-HGUT-02047 | g Aspergillus                  | 0.005595644  | 0.942439523 | 0.996925697 |
| g MGYG-HGUT-02047 | g Kazachstania                 | -0.071564987 | 0.355160342 | 0.900151743 |
| g MGYG-HGUT-02047 | g Malassezia                   | -0.03041292  | 0.694670741 | 0.966217026 |
| g MGYG-HGUT-02047 | g unclassified Fungi           | 0.126575648  | 0.101031461 | 0.8415005   |
| g MGYG-HGUT-02047 | g Fusarium                     | -0.094411254 | 0.222098721 | 0.874689648 |
| g MGYG-HGUT-02047 | g Mycosphaerella               | -0.06430847  | 0.406162496 | 0.913116876 |
| g MGYG-HGUT-02047 | g Simplicillium                | -0.054183426 | 0.484132795 | 0.932872225 |
| g MGYG-HGUT-02047 | g unclassified Cordycipitaceae | -0.082863749 | 0.284134799 | 0.8902203   |
| g MGYG-HGUT-02047 | g unidentified                 | 0.24225565   | 0.001506877 | 0.534709451 |
| g MGYG-HGUT-00516 | g Verticillium                 | 0.003011127  | 0.969006617 | 0.998625698 |
| g MGYG-HGUT-00516 | g unclassified Tremellomycetes | -0.143045592 | 0.063547075 | 0.835729559 |
| g MGYG-HGUT-00516 | g Candida                      | 0.001677293  | 0.982732738 | 0.998625698 |
| g MGYG-HGUT-00516 | g Cladosporium                 | 0.026936987  | 0.728106824 | 0.973007866 |
| g MGYG-HGUT-00516 | g Debaromyces                  | -0.050438445 | 0.514886375 | 0.938796978 |
| g MGYG-HGUT-00516 | g Aspergillus                  | -0.032121734 | 0.678441801 | 0.962963695 |
| g MGYG-HGUT-00516 | g Kazachstania                 | -0.103218076 | 0.181730403 | 0.872371283 |
| g MGYG-HGUT-00516 | g Malassezia                   | 0.110154143  | 0.153949663 | 0.85006873  |
| g MGYG-HGUT-00516 | g unclassified Fungi           | -0.002940471 | 0.969733529 | 0.998625698 |
| g MGYG-HGUT-00516 | g Fusarium                     | -0.006457931 | 0.933588435 | 0.996251765 |
| g MGYG-HGUT-00516 | g Mycosphaerella               | -0.056746626 | 0.463667089 | 0.927602832 |
| g MGYG-HGUT-00516 | g Simplicillium                | 0.219581858  | 0.004124601 | 0.600391491 |
| g MGYG-HGUT-00516 | g unclassified Cordycipitaceae | -0.010001102 | 0.897316018 | 0.995280411 |
| g MGYG-HGUT-00516 | g unidentified                 | 0.111141256  | 0.150271292 | 0.849249996 |
| g MGYG-HGUT-03840 | g Verticillium                 | -0.001618952 | 0.983333254 | 0.998696538 |
| g MGYG-HGUT-03840 | g unclassified Tremellomycetes | 0.067885891  | 0.380498039 | 0.90490297  |
| g MGYG-HGUT-03840 | g Candida                      | 0.072330297  | 0.35002541  | 0.900151743 |
| g MGYG-HGUT-03840 | g Cladosporium                 | -0.089486009 | 0.247269462 | 0.874689648 |
| g MGYG-HGUT-03840 | g Debaromyces                  | 0.010702101  | 0.890162416 | 0.994653074 |
| g MGYG-HGUT-03840 | g Aspergillus                  | -0.027643073 | 0.721270689 | 0.971835476 |
| g MGYG-HGUT-03840 | g Kazachstania                 | -0.059051327 | 0.445680714 | 0.921010267 |
| g MGYG-HGUT-03840 | g Malassezia                   | -0.188370782 | 0.01418109  | 0.702895198 |
| g MGYG-HGUT-03840 | g unclassified Fungi           | -0.18408899  | 0.016579224 | 0.702895198 |
| g MGYG-HGUT-03840 | g Fusarium                     | -0.12400094  | 0.108218159 | 0.843328451 |
| g MGYG-HGUT-03840 | g Mycosphaerella               | -0.039428583 | 0.610776485 | 0.951172976 |
| g MGYG-HGUT-03840 | g Simplicillium                | -0.031265624 | 0.686554544 | 0.963892039 |
| g MGYG-HGUT-03840 | g unclassified Cordycipitaceae | -0.004566795 | 0.95300944  | 0.99717368  |
| g MGYG-HGUT-03840 | g unidentified                 | -0.074137073 | 0.338088953 | 0.900151743 |
| g MGYG-HGUT-03996 | g Verticillium                 | -0.105072846 | 0.173964194 | 0.869335176 |

|                   |                                |              |             |             |
|-------------------|--------------------------------|--------------|-------------|-------------|
| g MGYG-HGUT-03996 | g unclassified Tremellomycetes | -0.053598578 | 0.488869569 | 0.932872225 |
| g MGYG-HGUT-03996 | g Candida                      | -0.022513371 | 0.771404295 | 0.984367362 |
| g MGYG-HGUT-03996 | g Cladosporium                 | -0.039557809 | 0.609606795 | 0.951110791 |
| g MGYG-HGUT-03996 | g Debaromyces                  | 0.004986187  | 0.948699701 | 0.996925697 |
| g MGYG-HGUT-03996 | g Aspergillus                  | -0.074033608 | 0.338765422 | 0.900151743 |
| g MGYG-HGUT-03996 | g Kazachstania                 | 0.146902479  | 0.056661644 | 0.832568254 |
| g MGYG-HGUT-03996 | g Malassezia                   | -0.083316967 | 0.281500093 | 0.8902203   |
| g MGYG-HGUT-03996 | g unclassified Fungi           | -0.051260735 | 0.508048698 | 0.936546622 |
| g MGYG-HGUT-03996 | g Fusarium                     | -0.045403141 | 0.557766237 | 0.942564508 |
| g MGYG-HGUT-03996 | g Mycosphaerella               | -0.058201681 | 0.452265258 | 0.923868417 |
| g MGYG-HGUT-03996 | g Simplicillium                | -0.041302581 | 0.593911637 | 0.947273049 |
| g MGYG-HGUT-03996 | g unclassified Cordycipitaceae | -0.071036348 | 0.358734668 | 0.900151743 |
| g MGYG-HGUT-03996 | g unidentified                 | 0.069003457  | 0.372687564 | 0.901117392 |
| g MGYG-HGUT-00468 | g Verticillium                 | 0.012021833  | 0.876719195 | 0.994526835 |
| g MGYG-HGUT-00468 | g unclassified Tremellomycetes | -0.091118465 | 0.238716342 | 0.874689648 |
| g MGYG-HGUT-00468 | g Candida                      | -0.035374771 | 0.647957195 | 0.955501166 |
| g MGYG-HGUT-00468 | g Cladosporium                 | 0.00990264   | 0.898321476 | 0.995280411 |
| g MGYG-HGUT-00468 | g Debaromyces                  | -0.029539897 | 0.703016415 | 0.967508066 |
| g MGYG-HGUT-00468 | g Aspergillus                  | -0.086192508 | 0.265167006 | 0.878368327 |
| g MGYG-HGUT-00468 | g Kazachstania                 | -0.023631625 | 0.760386199 | 0.982076388 |
| g MGYG-HGUT-00468 | g Malassezia                   | 0.066134119  | 0.392939613 | 0.907694413 |
| g MGYG-HGUT-00468 | g unclassified Fungi           | 0.045189079  | 0.559626608 | 0.942564508 |
| g MGYG-HGUT-00468 | g Fusarium                     | -0.02045577  | 0.791796097 | 0.986710331 |
| g MGYG-HGUT-00468 | g Mycosphaerella               | -0.057965171 | 0.454107795 | 0.924307006 |
| g MGYG-HGUT-00468 | g Simplicillium                | 0.151458722  | 0.049332647 | 0.832568254 |
| g MGYG-HGUT-00468 | g unclassified Cordycipitaceae | -0.026488411 | 0.732461017 | 0.973693103 |
| g MGYG-HGUT-00468 | g unidentified                 | 0.09905998   | 0.200061541 | 0.874689648 |
| g MGYG-HGUT-03963 | g Verticillium                 | -0.076999598 | 0.319714957 | 0.985364448 |
| g MGYG-HGUT-03963 | g unclassified Tremellomycetes | -0.076880483 | 0.320466381 | 0.898741278 |
| g MGYG-HGUT-03963 | g Candida                      | -0.026846453 | 0.72898492  | 0.973108701 |
| g MGYG-HGUT-03963 | g Cladosporium                 | -0.014972192 | 0.846798607 | 0.994526835 |
| g MGYG-HGUT-03963 | g Debaromyces                  | 0.021407673  | 0.782343811 | 0.986171666 |
| g MGYG-HGUT-03963 | g Aspergillus                  | -0.056548472 | 0.465232008 | 0.927602832 |
| g MGYG-HGUT-03963 | g Kazachstania                 | -0.000623611 | 0.993579669 | 0.999049974 |
| g MGYG-HGUT-03963 | g Malassezia                   | 0.047106637  | 0.543068715 | 0.942564508 |
| g MGYG-HGUT-03963 | g unclassified Fungi           | -0.004031069 | 0.958516601 | 0.997549257 |
| g MGYG-HGUT-03963 | g Fusarium                     | 0.025647511  | 0.740646321 | 0.977217936 |
| g MGYG-HGUT-03963 | g Mycosphaerella               | -0.049914179 | 0.519270475 | 0.939250598 |
| g MGYG-HGUT-03963 | g Simplicillium                | 0.084183492  | 0.276508566 | 0.888419029 |
| g MGYG-HGUT-03963 | g unclassified Cordycipitaceae | 0.013703918  | 0.859636387 | 0.994526835 |
| g MGYG-HGUT-03963 | g unidentified                 | 0.072808437  | 0.346841095 | 0.900151743 |
| g UBA1740         | g Verticillium                 | -0.072387028 | 0.349646639 | 0.900151743 |
| g UBA1740         | g unclassified Tremellomycetes | -0.074912761 | 0.333044831 | 0.900151743 |
| g UBA1740         | g Candida                      | -0.007253393 | 0.92543048  | 0.996251765 |
| g UBA1740         | g Cladosporium                 | 0.025442935  | 0.742642111 | 0.977770666 |
| g UBA1740         | g Debaromyces                  | -0.113808672 | 0.140663841 | 0.849249996 |
| g UBA1740         | g Aspergillus                  | 0.01248715   | 0.871987516 | 0.994526835 |
| g UBA1740         | g Kazachstania                 | -0.001681127 | 0.982693274 | 0.998625698 |
| g UBA1740         | g Malassezia                   | 0.035978962  | 0.642357199 | 0.955341199 |
| g UBA1740         | g unclassified Fungi           | 0.066002773  | 0.393882209 | 0.907694413 |
| g UBA1740         | g Fusarium                     | -0.014149296 | 0.855123792 | 0.994526835 |
| g UBA1740         | g Mycosphaerella               | -0.030478637 | 0.694043986 | 0.966086731 |
| g UBA1740         | g Simplicillium                | 0.114531435  | 0.138142987 | 0.849249996 |
| g UBA1740         | g unclassified Cordycipitaceae | -0.032796427 | 0.672074079 | 0.96129685  |
| g UBA1740         | g unidentified                 | 0.146235065  | 0.057807051 | 0.832568254 |
| g MGYG-HGUT-02872 | g Verticillium                 | 0.040486962  | 0.601225782 | 0.949616339 |
| g MGYG-HGUT-02872 | g unclassified Tremellomycetes | -0.132565014 | 0.08576995  | 0.8415005   |
| g MGYG-HGUT-02872 | g Candida                      | -0.047884983 | 0.536417475 | 0.941323418 |
| g MGYG-HGUT-02872 | g Cladosporium                 | -0.038451332 | 0.619653809 | 0.952309753 |
| g MGYG-HGUT-02872 | g Debaromyces                  | -0.04607573  | 0.551940373 | 0.942564508 |
| g MGYG-HGUT-02872 | g Aspergillus                  | -0.018443414 | 0.811877093 | 0.991049439 |
| g MGYG-HGUT-02872 | g Kazachstania                 | -0.086113812 | 0.265605201 | 0.878368327 |
| g MGYG-HGUT-02872 | g Malassezia                   | 0.101311909  | 0.189974374 | 0.87460258  |
| g MGYG-HGUT-02872 | g unclassified Fungi           | 0.047003722  | 0.543951198 | 0.942564508 |
| g MGYG-HGUT-02872 | g Fusarium                     | -0.065264679 | 0.399204285 | 0.909588897 |
| g MGYG-HGUT-02872 | g Mycosphaerella               | 0.048627589  | 0.530109728 | 0.940412658 |
| g MGYG-HGUT-02872 | g Simplicillium                | 0.09893953   | 0.200611791 | 0.874689648 |
| g MGYG-HGUT-02872 | g unclassified Cordycipitaceae | 0.002093243  | 0.978451581 | 0.998625698 |
| g MGYG-HGUT-02872 | g unidentified                 | 0.107659916  | 0.163545875 | 0.860247571 |
| g UCG-010         | g Verticillium                 | 0.056472315  | 0.465834226 | 0.927602832 |
| g UCG-010         | g unclassified Tremellomycetes | -0.174799603 | 0.023022625 | 0.764130246 |
| g UCG-010         | g Candida                      | -0.061848965 | 0.424386466 | 0.918239588 |
| g UCG-010         | g Cladosporium                 | -0.034525075 | 0.655866127 | 0.956614192 |
| g UCG-010         | g Debaromyces                  | -0.078228825 | 0.312027317 | 0.898139407 |
| g UCG-010         | g Aspergillus                  | -0.076006112 | 0.326017213 | 0.899370541 |
| g UCG-010         | g Kazachstania                 | 0.036256454  | 0.639791955 | 0.955341199 |
| g UCG-010         | g Malassezia                   | 0.080903517  | 0.295720302 | 0.892181547 |
| g UCG-010         | g unclassified Fungi           | -0.03099194  | 0.689155674 | 0.96434561  |

|                   |                                |              |             |             |
|-------------------|--------------------------------|--------------|-------------|-------------|
| g UCG-010         | g Fusarium                     | -0.055002055 | 0.477544245 | 0.931740764 |
| g UCG-010         | g Mycosphaerella               | -0.067037151 | 0.386495799 | 0.906174944 |
| g UCG-010         | g Simplicillium                | 0.089180585  | 0.248893033 | 0.874689648 |
| g UCG-010         | g unclassified Cordycipitaceae | 0.02963702   | 0.702086192 | 0.967505184 |
| g UCG-010         | g unidentified                 | 0.121098064  | 0.116795151 | 0.847040293 |
| g MGYG-HGUT-00476 | g Verticillium                 | 0.010325614  | 0.89400335  | 0.995135868 |
| g MGYG-HGUT-00476 | g unclassified Tremellomycetes | -0.099068207 | 0.200023997 | 0.874689648 |
| g MGYG-HGUT-00476 | g Candida                      | -0.179433591 | 0.01957989  | 0.702895198 |
| g MGYG-HGUT-00476 | g Cladosporium                 | -0.078314834 | 0.311493975 | 0.897967316 |
| g MGYG-HGUT-00476 | g Debaromyces                  | -0.052954917 | 0.494111148 | 0.933812362 |
| g MGYG-HGUT-00476 | g Aspergillus                  | -0.037030078 | 0.632662839 | 0.954068873 |
| g MGYG-HGUT-00476 | g Kazachstania                 | -0.056497553 | 0.465634611 | 0.927602832 |
| g MGYG-HGUT-00476 | g Malassezia                   | 0.02791421   | 0.718651432 | 0.970778853 |
| g MGYG-HGUT-00476 | g unclassified Fungi           | 0.016140955  | 0.835003588 | 0.994526835 |
| g MGYG-HGUT-00476 | g Fusarium                     | -0.040527044 | 0.600865405 | 0.949569069 |
| g MGYG-HGUT-00476 | g Mycosphaerella               | -0.047222211 | 0.542078522 | 0.941903852 |
| g MGYG-HGUT-00476 | g Simplicillium                | 0.08025895   | 0.299597396 | 0.89308096  |
| g MGYG-HGUT-00476 | g unclassified Cordycipitaceae | -0.030654579 | 0.692367007 | 0.966086731 |
| g MGYG-HGUT-00476 | g unidentified                 | 0.070089857  | 0.365190005 | 0.901117392 |
| g MGYG-HGUT-02913 | g Verticillium                 | -0.053405128 | 0.490441778 | 0.932872225 |
| g MGYG-HGUT-02913 | g unclassified Tremellomycetes | -0.140933595 | 0.067598767 | 0.836350979 |
| g MGYG-HGUT-02913 | g Candida                      | -0.026306646 | 0.734227798 | 0.974113555 |
| g MGYG-HGUT-02913 | g Cladosporium                 | -0.066386245 | 0.391134046 | 0.907694413 |
| g MGYG-HGUT-02913 | g Debaromyces                  | 0.006436773  | 0.933805521 | 0.996251765 |
| g MGYG-HGUT-02913 | g Aspergillus                  | 0.118470682  | 0.125005977 | 0.849176369 |
| g MGYG-HGUT-02913 | g Kazachstania                 | 0.021408674  | 0.782333884 | 0.986171666 |
| g MGYG-HGUT-02913 | g Malassezia                   | 0.050181454  | 0.517033038 | 0.938796978 |
| g MGYG-HGUT-02913 | g unclassified Fungi           | 0.11396031   | 0.140132071 | 0.849249996 |
| g MGYG-HGUT-02913 | g Fusarium                     | 0.045815151  | 0.554193951 | 0.942564508 |
| g MGYG-HGUT-02913 | g Mycosphaerella               | -0.029892583 | 0.699640572 | 0.967505184 |
| g MGYG-HGUT-02913 | g Simplicillium                | 0.077619315  | 0.315824006 | 0.898525398 |
| g MGYG-HGUT-02913 | g unclassified Cordycipitaceae | -0.094981115 | 0.21930827  | 0.874689648 |
| g MGYG-HGUT-02913 | g unidentified                 | 0.244757751  | 0.001340525 | 0.534709451 |
| g MGYG-HGUT-00894 | g Verticillium                 | -0.038866804 | 0.615872857 | 0.95208495  |
| g MGYG-HGUT-00894 | g unclassified Tremellomycetes | 0.196454202  | 0.010468832 | 0.613926619 |
| g MGYG-HGUT-00894 | g Candida                      | -0.018244694 | 0.813866988 | 0.991049439 |
| g MGYG-HGUT-00894 | g Cladosporium                 | 0.033194852  | 0.668324652 | 0.960389755 |
| g MGYG-HGUT-00894 | g Debaromyces                  | 0.021688927  | 0.77955701  | 0.985246269 |
| g MGYG-HGUT-00894 | g Aspergillus                  | -0.002009709 | 0.979311307 | 0.998625698 |
| g MGYG-HGUT-00894 | g Kazachstania                 | -0.10468916  | 0.175550245 | 0.871837921 |
| g MGYG-HGUT-00894 | g Malassezia                   | -0.111129653 | 0.150314138 | 0.849249996 |
| g MGYG-HGUT-00894 | g unclassified Fungi           | -0.168560061 | 0.028472253 | 0.77775889  |
| g MGYG-HGUT-00894 | g Fusarium                     | -0.101498289 | 0.189156461 | 0.873641816 |
| g MGYG-HGUT-00894 | g Mycosphaerella               | -0.052756873 | 0.495729864 | 0.934532841 |
| g MGYG-HGUT-00894 | g Simplicillium                | -0.040260618 | 0.603262665 | 0.950399198 |
| g MGYG-HGUT-00894 | g unclassified Cordycipitaceae | 0.059263596  | 0.444044182 | 0.921010267 |
| g MGYG-HGUT-00894 | g unidentified                 | -0.149584319 | 0.052246241 | 0.832568254 |
| g MGYG-HGUT-04108 | g Verticillium                 | -0.034959237 | 0.65182012  | 0.955597379 |
| g MGYG-HGUT-04108 | g unclassified Tremellomycetes | -0.180494619 | 0.018857491 | 0.702895198 |
| g MGYG-HGUT-04108 | g Candida                      | 0.002937667  | 0.969762377 | 0.998625698 |
| g MGYG-HGUT-04108 | g Cladosporium                 | -0.043887742 | 0.571000011 | 0.942564508 |
| g MGYG-HGUT-04108 | g Debaromyces                  | -0.043212825 | 0.576941271 | 0.943618965 |
| g MGYG-HGUT-04108 | g Aspergillus                  | 0.005136116  | 0.947159371 | 0.996925697 |
| g MGYG-HGUT-04108 | g Kazachstania                 | -0.021309896 | 0.783313283 | 0.986399684 |
| g MGYG-HGUT-04108 | g Malassezia                   | 0.046526471  | 0.548052771 | 0.942564508 |
| g MGYG-HGUT-04108 | g unclassified Fungi           | -0.035925936 | 0.642847877 | 0.955341199 |
| g MGYG-HGUT-04108 | g Fusarium                     | 0.026613238  | 0.731248499 | 0.973693103 |
| g MGYG-HGUT-04108 | g Mycosphaerella               | -0.087956912 | 0.255471831 | 0.875348885 |
| g MGYG-HGUT-04108 | g Simplicillium                | 0.101579096  | 0.188802645 | 0.873641816 |
| g MGYG-HGUT-04108 | g unclassified Cordycipitaceae | -0.019568188 | 0.800637126 | 0.987523813 |
| g MGYG-HGUT-04108 | g unidentified                 | 0.195367544  | 0.010911939 | 0.633167004 |
| g MGYG-HGUT-04231 | g Verticillium                 | -0.038612662 | 0.618184456 | 0.952309753 |
| g MGYG-HGUT-04231 | g unclassified Tremellomycetes | -0.056818832 | 0.463097569 | 0.927602832 |
| g MGYG-HGUT-04231 | g Candida                      | -0.025527537 | 0.741816554 | 0.977585637 |
| g MGYG-HGUT-04231 | g Cladosporium                 | -0.009499944 | 0.902435373 | 0.995280411 |
| g MGYG-HGUT-04231 | g Debaromyces                  | -0.099475365 | 0.198172314 | 0.874689648 |
| g MGYG-HGUT-04231 | g Aspergillus                  | 0.076305199  | 0.32411157  | 0.899370541 |
| g MGYG-HGUT-04231 | g Kazachstania                 | -0.014560607 | 0.85096053  | 0.994526835 |
| g MGYG-HGUT-04231 | g Malassezia                   | 0.016860309  | 0.827762016 | 0.993650851 |
| g MGYG-HGUT-04231 | g unclassified Fungi           | 0.070464953  | 0.362623196 | 0.901117392 |
| g MGYG-HGUT-04231 | g Fusarium                     | -0.038682442 | 0.617549382 | 0.952309753 |
| g MGYG-HGUT-04231 | g Mycosphaerella               | -0.020719026 | 0.789178891 | 0.986710331 |
| g MGYG-HGUT-04231 | g Simplicillium                | 0.068601007  | 0.37548881  | 0.903077197 |
| g MGYG-HGUT-04231 | g unclassified Cordycipitaceae | -0.009765121 | 0.899726058 | 0.995280411 |
| g MGYG-HGUT-04231 | g unidentified                 | 0.118543545  | 0.124772415 | 0.849176369 |
| g MGYG-HGUT-00366 | g Verticillium                 | -0.00373298  | 0.961581762 | 0.998221928 |
| g MGYG-HGUT-00366 | g unclassified Tremellomycetes | -0.031534717 | 0.684000624 | 0.963892039 |
| g MGYG-HGUT-00366 | g Candida                      | -0.094550287 | 0.221415602 | 0.874689648 |



|                   |                                |              |             |             |
|-------------------|--------------------------------|--------------|-------------|-------------|
| g MGYG-HGUT-00366 | g Cladosporium                 | 0.020187166  | 0.79446886  | 0.987041436 |
| g MGYG-HGUT-00366 | g Debaryomyces                 | -0.039280202 | 0.612120773 | 0.951172976 |
| g MGYG-HGUT-00366 | g Aspergillus                  | -0.101605369 | 0.18868771  | 0.873641816 |
| g MGYG-HGUT-00366 | g Kazachstania                 | -0.014175297 | 0.854864092 | 0.994526835 |
| g MGYG-HGUT-00366 | g Malassezia                   | 0.039527     | 0.609885568 | 0.951116337 |
| g MGYG-HGUT-00366 | g unclassified Fungi           | -0.084075877 | 0.277125199 | 0.888809018 |
| g MGYG-HGUT-00366 | g Fusarium                     | -0.073766698 | 0.34051448  | 0.900151743 |
| g MGYG-HGUT-00366 | g Mycosphaerella               | -0.065328105 | 0.398745275 | 0.909588897 |
| g MGYG-HGUT-00366 | g Simplicillium                | 0.157328362  | 0.04106935  | 0.808354944 |
| g MGYG-HGUT-00366 | g unclassified Cordycipitaceae | 0.006401676  | 0.934165636 | 0.996251765 |
| g MGYG-HGUT-00366 | g unidentified                 | 0.114916945  | 0.136812591 | 0.849249996 |
| g UBA1206         | g Verticillium                 | -0.015226778 | 0.84422636  | 0.994526835 |
| g UBA1206         | g unclassified Tremellomycetes | -0.121482193 | 0.115630717 | 0.845332008 |
| g UBA1206         | g Candida                      | -0.053973664 | 0.485828849 | 0.932872225 |
| g UBA1206         | g Cladosporium                 | 0.021602627  | 0.780411812 | 0.985772094 |
| g UBA1206         | g Debaryomyces                 | -0.074411097 | 0.336301512 | 0.900151743 |
| g UBA1206         | g Aspergillus                  | 0.011521735  | 0.881809431 | 0.994526835 |
| g UBA1206         | g Kazachstania                 | -0.059648153 | 0.441088022 | 0.920204792 |
| g UBA1206         | g Malassezia                   | 0.094676141  | 0.220798525 | 0.874689648 |
| g UBA1206         | g unclassified Fungi           | -0.030034642 | 0.69828246  | 0.967320417 |
| g UBA1206         | g Fusarium                     | 0.035650739  | 0.645396887 | 0.955501166 |
| g UBA1206         | g Mycosphaerella               | -0.041318999 | 0.593764825 | 0.947273049 |
| g UBA1206         | g Simplicillium                | 0.102850437  | 0.183299573 | 0.873537668 |
| g UBA1206         | g unclassified Cordycipitaceae | -0.036091207 | 0.641319053 | 0.955341199 |
| g UBA1206         | g unidentified                 | 0.205304703  | 0.007412103 | 0.613926619 |
| g MGYG-HGUT-03105 | g Verticillium                 | 0.163645672  | 0.033506763 | 0.808354944 |
| g MGYG-HGUT-03105 | g unclassified Tremellomycetes | -0.151540326 | 0.049208933 | 0.832568254 |
| g MGYG-HGUT-03105 | g Candida                      | -0.030347439 | 0.695295449 | 0.966520388 |
| g MGYG-HGUT-03105 | g Cladosporium                 | 0.024859582  | 0.748342523 | 0.979147232 |
| g MGYG-HGUT-03105 | g Debaryomyces                 | -0.13085792  | 0.089918574 | 0.8415005   |
| g MGYG-HGUT-03105 | g Aspergillus                  | -0.025006771 | 0.746902926 | 0.979147232 |
| g MGYG-HGUT-03105 | g Kazachstania                 | -0.006099788 | 0.937263724 | 0.996251765 |
| g MGYG-HGUT-03105 | g Malassezia                   | 0.103609689  | 0.180069791 | 0.872371283 |
| g MGYG-HGUT-03105 | g unclassified Fungi           | -0.000169808 | 0.998251744 | 0.999334917 |
| g MGYG-HGUT-03105 | g Fusarium                     | -0.008441809 | 0.913257245 | 0.996251765 |
| g MGYG-HGUT-03105 | g Mycosphaerella               | -0.003880874 | 0.960060941 | 0.997919102 |
| g MGYG-HGUT-03105 | g Simplicillium                | 0.14852281   | 0.053958571 | 0.832568254 |
| g MGYG-HGUT-03105 | g unclassified Cordycipitaceae | 0.032236587  | 0.677356196 | 0.962963695 |
| g MGYG-HGUT-03105 | g unidentified                 | 0.185588432  | 0.01570204  | 0.702895198 |
| g QAMX01          | g Verticillium                 | 0.027257379  | 0.725002179 | 0.972631421 |
| g QAMX01          | g unclassified Tremellomycetes | -0.114117058 | 0.139583997 | 0.849249996 |
| g QAMX01          | g Candida                      | -0.054235836 | 0.483709529 | 0.932872225 |
| g QAMX01          | g Cladosporium                 | -0.033382999 | 0.666556902 | 0.959833616 |
| g QAMX01          | g Debaryomyces                 | -0.110424581 | 0.152935226 | 0.85006873  |
| g QAMX01          | g Aspergillus                  | 0.044271617  | 0.56763371  | 0.942564508 |
| g QAMX01          | g Kazachstania                 | -0.018453347 | 0.81177766  | 0.991049439 |
| g QAMX01          | g Malassezia                   | -0.001318316 | 0.986427907 | 0.999049974 |
| g QAMX01          | g unclassified Fungi           | 0.08126493   | 0.29356102  | 0.892181547 |
| g QAMX01          | g Fusarium                     | -0.040433849 | 0.601703473 | 0.949974496 |
| g QAMX01          | g Mycosphaerella               | 0.017263266  | 0.823711832 | 0.992484281 |
| g QAMX01          | g Simplicillium                | 0.011352488  | 0.883533205 | 0.994526835 |
| g QAMX01          | g unclassified Cordycipitaceae | -0.02834299  | 0.714515982 | 0.970380158 |
| g QAMX01          | g unidentified                 | 0.207680208  | 0.006740277 | 0.613926619 |
| g UBA644          | g Verticillium                 | 0.039088693  | 0.613857702 | 0.951172976 |
| g UBA644          | g unclassified Tremellomycetes | -0.054984757 | 0.47768296  | 0.931740764 |
| g UBA644          | g Candida                      | -0.060817402 | 0.432168762 | 0.918239588 |
| g UBA644          | g Cladosporium                 | -0.014375784 | 0.852830792 | 0.994526835 |
| g UBA644          | g Debaryomyces                 | -0.152851279 | 0.047256605 | 0.832040912 |
| g UBA644          | g Aspergillus                  | -0.062235767 | 0.421489428 | 0.916999262 |
| g UBA644          | g Kazachstania                 | -0.081065066 | 0.29475382  | 0.892181547 |
| g UBA644          | g Malassezia                   | 0.121628658  | 0.115189118 | 0.844110246 |
| g UBA644          | g unclassified Fungi           | 0.01424663   | 0.854138217 | 0.994526835 |
| g UBA644          | g Fusarium                     | -0.017299188 | 0.823350997 | 0.992484281 |
| g UBA644          | g Mycosphaerella               | 0.001920097  | 0.980233608 | 0.998625698 |
| g UBA644          | g Simplicillium                | 0.088484982  | 0.25261824  | 0.874689648 |
| g UBA644          | g unclassified Cordycipitaceae | -0.04503717  | 0.560948626 | 0.942564508 |
| g UBA644          | g unidentified                 | 0.138495316  | 0.07253577  | 0.8415005   |
| g MGYG-HGUT-01818 | g Verticillium                 | 0.047294581  | 0.541458943 | 0.94160936  |
| g MGYG-HGUT-01818 | g unclassified Tremellomycetes | -0.118147223 | 0.12604691  | 0.849249996 |
| g MGYG-HGUT-01818 | g Candida                      | -0.041743165 | 0.589977509 | 0.947252808 |
| g MGYG-HGUT-01818 | g Cladosporium                 | 0.018464255  | 0.811668468 | 0.991049439 |
| g MGYG-HGUT-01818 | g Debaryomyces                 | -0.02652354  | 0.732119721 | 0.973693103 |
| g MGYG-HGUT-01818 | g Aspergillus                  | -0.00780534  | 0.919774421 | 0.996251765 |
| g MGYG-HGUT-01818 | g Kazachstania                 | -0.1064577   | 0.168327798 | 0.864987015 |
| g MGYG-HGUT-01818 | g Malassezia                   | 0.13457773   | 0.081077042 | 0.8415005   |
| g MGYG-HGUT-01818 | g unclassified Fungi           | 0.009768455  | 0.899692003 | 0.995280411 |
| g MGYG-HGUT-01818 | g Fusarium                     | -0.08921221  | 0.248724583 | 0.874689648 |
| g MGYG-HGUT-01818 | g Mycosphaerella               | -0.111775396 | 0.147943518 | 0.849249996 |

|                        |                                       |              |             |             |
|------------------------|---------------------------------------|--------------|-------------|-------------|
| g MGYG-HGUT-01818      | g <i>Simplicillium</i>                | 0.159817651  | 0.037933743 | 0.808354944 |
| g MGYG-HGUT-01818      | g unclassified <i>Cordycipitaceae</i> | 0.016054496  | 0.835874898 | 0.994526835 |
| g MGYG-HGUT-01818      | g unidentified                        | 0.038740315  | 0.617022894 | 0.952309753 |
| g <i>Lachnospira</i>   | g <i>Verticillium</i>                 | 0.043822379  | 0.571574139 | 0.942564508 |
| g <i>Lachnospira</i>   | g unclassified <i>Tremellomycetes</i> | 0.030078526  | 0.697863119 | 0.967320417 |
| g <i>Lachnospira</i>   | g <i>Candida</i>                      | -0.047663355 | 0.538307214 | 0.941323418 |
| g <i>Lachnospira</i>   | g <i>Cladosporium</i>                 | 0.115106021  | 0.136163677 | 0.849249996 |
| g <i>Lachnospira</i>   | g <i>Debaryomyces</i>                 | -0.091283893 | 0.237861284 | 0.874689648 |
| g <i>Lachnospira</i>   | g <i>Aspergillus</i>                  | -0.063699576 | 0.410630489 | 0.913242396 |
| g <i>Lachnospira</i>   | g <i>Kazachstania</i>                 | 0.118482834  | 0.124967002 | 0.849176369 |
| g <i>Lachnospira</i>   | g <i>Malassezia</i>                   | -0.006706403 | 0.931039418 | 0.996251765 |
| g <i>Lachnospira</i>   | g unclassified <i>Fungi</i>           | 0.069769071  | 0.367394068 | 0.901117392 |
| g <i>Lachnospira</i>   | g <i>Fusarium</i>                     | -0.113719721 | 0.14097649  | 0.849249996 |
| g <i>Lachnospira</i>   | g <i>Mycosphaerella</i>               | 0.094188443  | 0.223196585 | 0.874689648 |
| g <i>Lachnospira</i>   | g <i>Simplicillium</i>                | -0.005971672 | 0.938578788 | 0.996251765 |
| g <i>Lachnospira</i>   | g unclassified <i>Cordycipitaceae</i> | 0.029533049  | 0.703082023 | 0.967508066 |
| g <i>Lachnospira</i>   | g unidentified                        | 0.091942296  | 0.234479405 | 0.874689648 |
| g <i>Eubacterium</i> F | g <i>Verticillium</i>                 | 0.104559637  | 0.176088064 | 0.871837921 |
| g <i>Eubacterium</i> F | g unclassified <i>Tremellomycetes</i> | 0.058065921  | 0.453322385 | 0.923868417 |
| g <i>Eubacterium</i> F | g <i>Candida</i>                      | -0.130869699 | 0.089889409 | 0.8415005   |
| g <i>Eubacterium</i> F | g <i>Cladosporium</i>                 | 0.133555598  | 0.083433786 | 0.8415005   |
| g <i>Eubacterium</i> F | g <i>Debaryomyces</i>                 | -0.130513047 | 0.090775818 | 0.8415005   |
| g <i>Eubacterium</i> F | g <i>Aspergillus</i>                  | -0.000610486 | 0.993714795 | 0.999049974 |
| g <i>Eubacterium</i> F | g <i>Kazachstania</i>                 | 0.055953113  | 0.469951304 | 0.928769554 |
| g <i>Eubacterium</i> F | g <i>Malassezia</i>                   | 0.043140779  | 0.57757719  | 0.943638597 |
| g <i>Eubacterium</i> F | g unclassified <i>Fungi</i>           | -0.112461367 | 0.145456336 | 0.849249996 |
| g <i>Eubacterium</i> F | g <i>Fusarium</i>                     | -0.1161698   | 0.132556583 | 0.849249996 |
| g <i>Eubacterium</i> F | g <i>Mycosphaerella</i>               | -0.020002955 | 0.796303258 | 0.987463135 |
| g <i>Eubacterium</i> F | g <i>Simplicillium</i>                | 0.146311706  | 0.057674558 | 0.832568254 |
| g <i>Eubacterium</i> F | g unclassified <i>Cordycipitaceae</i> | 0.098281823  | 0.20363571  | 0.874689648 |
| g <i>Eubacterium</i> F | g unidentified                        | 0.081626171  | 0.29141327  | 0.892181547 |
| g <i>Acetatifactor</i> | g <i>Verticillium</i>                 | 0.045207208  | 0.559468938 | 0.942564508 |
| g <i>Acetatifactor</i> | g unclassified <i>Tremellomycetes</i> | -0.052820466 | 0.495209779 | 0.934115958 |
| g <i>Acetatifactor</i> | g <i>Candida</i>                      | -0.080728801 | 0.296767918 | 0.892181547 |
| g <i>Acetatifactor</i> | g <i>Cladosporium</i>                 | 0.121091787  | 0.116814255 | 0.847040293 |
| g <i>Acetatifactor</i> | g <i>Debaryomyces</i>                 | -0.122964792 | 0.111221059 | 0.843328451 |
| g <i>Acetatifactor</i> | g <i>Aspergillus</i>                  | 0.034552405  | 0.655611134 | 0.956614192 |
| g <i>Acetatifactor</i> | g <i>Kazachstania</i>                 | 0.019913227  | 0.797197177 | 0.987463135 |
| g <i>Acetatifactor</i> | g <i>Malassezia</i>                   | 0.096657772  | 0.211243069 | 0.874689648 |
| g <i>Acetatifactor</i> | g unclassified <i>Fungi</i>           | 0.119262024  | 0.122487345 | 0.849176369 |
| g <i>Acetatifactor</i> | g <i>Fusarium</i>                     | -0.062163541 | 0.422029505 | 0.916999262 |
| g <i>Acetatifactor</i> | g <i>Mycosphaerella</i>               | -0.050167804 | 0.517147187 | 0.938796978 |
| g <i>Acetatifactor</i> | g <i>Simplicillium</i>                | 0.22242476   | 0.003654248 | 0.581277392 |
| g <i>Acetatifactor</i> | g unclassified <i>Cordycipitaceae</i> | 0.054462093  | 0.48188454  | 0.932872225 |
| g <i>Acetatifactor</i> | g unidentified                        | 0.107801778  | 0.162988369 | 0.859887758 |
| g <i>Faecalicatena</i> | g <i>Verticillium</i>                 | 0.070249994  | 0.364092806 | 0.901117392 |
| g <i>Faecalicatena</i> | g unclassified <i>Tremellomycetes</i> | 0.161936506  | 0.035426073 | 0.808354944 |
| g <i>Faecalicatena</i> | g <i>Candida</i>                      | 0.021707902  | 0.779369094 | 0.985246269 |
| g <i>Faecalicatena</i> | g <i>Cladosporium</i>                 | 0.012497924  | 0.871878013 | 0.994526835 |
| g <i>Faecalicatena</i> | g <i>Debaryomyces</i>                 | 0.053972161  | 0.485841017 | 0.932872225 |
| g <i>Faecalicatena</i> | g <i>Aspergillus</i>                  | 0.03968021   | 0.608499792 | 0.951102497 |
| g <i>Faecalicatena</i> | g <i>Kazachstania</i>                 | 0.114069393  | 0.139750487 | 0.849249996 |
| g <i>Faecalicatena</i> | g <i>Malassezia</i>                   | -0.004318316 | 0.955563498 | 0.99717368  |
| g <i>Faecalicatena</i> | g unclassified <i>Fungi</i>           | -0.26231935  | 0.000570261 | 0.534709451 |
| g <i>Faecalicatena</i> | g <i>Fusarium</i>                     | 0.020579034  | 0.790570356 | 0.986710331 |
| g <i>Faecalicatena</i> | g <i>Mycosphaerella</i>               | -0.051306343 | 0.507670836 | 0.936546622 |
| g <i>Faecalicatena</i> | g <i>Simplicillium</i>                | 0.079823001  | 0.302238607 | 0.896412022 |
| g <i>Faecalicatena</i> | g unclassified <i>Cordycipitaceae</i> | 0.056495524  | 0.465650651 | 0.927602832 |
| g <i>Faecalicatena</i> | g unidentified                        | -0.132105943 | 0.086870227 | 0.8415005   |
| g <i>Roseburia</i>     | g <i>Verticillium</i>                 | 0.025191275  | 0.745099589 | 0.978825119 |
| g <i>Roseburia</i>     | g unclassified <i>Tremellomycetes</i> | 0.111444069  | 0.149156309 | 0.849249996 |
| g <i>Roseburia</i>     | g <i>Candida</i>                      | -0.1195423   | 0.121604784 | 0.849176369 |
| g <i>Roseburia</i>     | g <i>Cladosporium</i>                 | -0.00779128  | 0.919918457 | 0.996251765 |
| g <i>Roseburia</i>     | g <i>Debaryomyces</i>                 | -0.121683795 | 0.115023217 | 0.843564547 |
| g <i>Roseburia</i>     | g <i>Aspergillus</i>                  | -0.011643219 | 0.880572457 | 0.994526835 |
| g <i>Roseburia</i>     | g <i>Kazachstania</i>                 | 0.067713835  | 0.381709304 | 0.90490297  |
| g <i>Roseburia</i>     | g <i>Malassezia</i>                   | 0.079060251  | 0.306896567 | 0.897967316 |
| g <i>Roseburia</i>     | g unclassified <i>Fungi</i>           | -0.075990833 | 0.326114757 | 0.899370541 |
| g <i>Roseburia</i>     | g <i>Fusarium</i>                     | -0.09373917  | 0.225421994 | 0.874689648 |
| g <i>Roseburia</i>     | g <i>Mycosphaerella</i>               | -0.001364948 | 0.985947876 | 0.999049974 |
| g <i>Roseburia</i>     | g <i>Simplicillium</i>                | 0.094791685  | 0.220233078 | 0.874689648 |
| g <i>Roseburia</i>     | g unclassified <i>Cordycipitaceae</i> | 0.02407417   | 0.756038957 | 0.981293944 |
| g <i>Roseburia</i>     | g unidentified                        | -0.076325376 | 0.323983272 | 0.899370541 |
| g <i>Blautia</i> A     | g <i>Verticillium</i>                 | -0.03977019  | 0.607686566 | 0.951102497 |
| g <i>Blautia</i> A     | g unclassified <i>Tremellomycetes</i> | 0.035259549  | 0.649027394 | 0.955501166 |
| g <i>Blautia</i> A     | g <i>Candida</i>                      | -0.039694862 | 0.608367334 | 0.951102497 |
| g <i>Blautia</i> A     | g <i>Cladosporium</i>                 | -0.082889225 | 0.283986262 | 0.8902203   |
| g <i>Blautia</i> A     | g <i>Debaryomyces</i>                 | -0.008319967 | 0.91450442  | 0.996251765 |

|                 |                                |              |             |             |
|-----------------|--------------------------------|--------------|-------------|-------------|
| g Blautia A     | g Aspergillus                  | 0.006652885  | 0.931588393 | 0.996251765 |
| g Blautia A     | g Kazachstania                 | 0.014527448  | 0.851296011 | 0.994526835 |
| g Blautia A     | g Malassezia                   | 0.036071261  | 0.64150348  | 0.955341199 |
| g Blautia A     | g unclassified_Fungi           | -0.135824766 | 0.078274579 | 0.8415005   |
| g Blautia A     | g Fusarium                     | -0.013342766 | 0.86329895  | 0.994526835 |
| g Blautia A     | g Mycosphaerella               | -0.125982953 | 0.102651503 | 0.841929371 |
| g Blautia A     | g Simplicillium                | 0.005075897  | 0.947778022 | 0.996925697 |
| g Blautia A     | g unclassified_Cordycipitaceae | -0.000522486 | 0.994620776 | 0.999049974 |
| g Blautia A     | g unidentified                 | -0.025727235 | 0.739869025 | 0.977217936 |
| g Clostridium M | g Verticillium                 | 0.118952623  | 0.123467367 | 0.849176369 |
| g Clostridium M | g unclassified_Tremellomycetes | 0.106252895  | 0.169152692 | 0.864987015 |
| g Clostridium M | g Candida                      | -0.025618746 | 0.740926849 | 0.977217936 |
| g Clostridium M | g Cladosporium                 | 0.03209358   | 0.678708018 | 0.962963695 |
| g Clostridium M | g Debaryomyces                 | -0.000959131 | 0.990125496 | 0.999049974 |
| g Clostridium M | g Aspergillus                  | -0.01723717  | 0.823973981 | 0.992484281 |
| g Clostridium M | g Kazachstania                 | 0.040270509  | 0.603173592 | 0.950399198 |
| g Clostridium M | g Malassezia                   | 0.05770786   | 0.456117137 | 0.924332119 |
| g Clostridium M | g unclassified_Fungi           | -0.065926188 | 0.394432445 | 0.908169139 |
| g Clostridium M | g Fusarium                     | -0.126460429 | 0.101344806 | 0.8415005   |
| g Clostridium M | g Mycosphaerella               | 0.073133178  | 0.344688843 | 0.900151743 |
| g Clostridium M | g Simplicillium                | -0.112047787 | 0.14695206  | 0.849249996 |
| g Clostridium M | g unclassified_Cordycipitaceae | 0.121983175  | 0.114125672 | 0.843328451 |
| g Clostridium M | g unidentified                 | -0.126487247 | 0.101271804 | 0.8415005   |
| g Dorea         | g Verticillium                 | 0.079152497  | 0.306330747 | 0.897967316 |
| g Dorea         | g unclassified_Tremellomycetes | 0.098006968  | 0.204909095 | 0.874689648 |
| g Dorea         | g Candida                      | -0.097628419 | 0.206672267 | 0.874689648 |
| g Dorea         | g Cladosporium                 | 0.13168376   | 0.087892037 | 0.8415005   |
| g Dorea         | g Debaryomyces                 | -0.047810917 | 0.53704864  | 0.941323418 |
| g Dorea         | g Aspergillus                  | 0.034682538  | 0.654397545 | 0.956614192 |
| g Dorea         | g Kazachstania                 | 0.043252948  | 0.576587267 | 0.943618965 |
| g Dorea         | g Malassezia                   | 0.078465354  | 0.310562025 | 0.897967316 |
| g Dorea         | g unclassified_Fungi           | -0.093050095 | 0.228865663 | 0.874689648 |
| g Dorea         | g Fusarium                     | -0.127723774 | 0.097950708 | 0.8415005   |
| g Dorea         | g Mycosphaerella               | -0.031818597 | 0.68131025  | 0.963631515 |
| g Dorea         | g Simplicillium                | 0.149719625  | 0.052031249 | 0.832568254 |
| g Dorea         | g unclassified_Cordycipitaceae | 0.103283378  | 0.181452712 | 0.872371283 |
| g Dorea         | g unidentified                 | -0.059380216 | 0.443146519 | 0.920619182 |
| g Clostridium Q | g Verticillium                 | 0.158143689  | 0.040019197 | 0.808354944 |
| g Clostridium Q | g unclassified_Tremellomycetes | 0.063334305  | 0.413324638 | 0.915150306 |
| g Clostridium Q | g Candida                      | -0.003220679 | 0.966850903 | 0.998625698 |
| g Clostridium Q | g Cladosporium                 | 0.033513024  | 0.665336322 | 0.959776195 |
| g Clostridium Q | g Debaryomyces                 | -0.061680905 | 0.425648775 | 0.918239588 |
| g Clostridium Q | g Aspergillus                  | 0.046410722  | 0.549049819 | 0.942564508 |
| g Clostridium Q | g Kazachstania                 | 0.027799683  | 0.719757395 | 0.971113188 |
| g Clostridium Q | g Malassezia                   | 0.102111413  | 0.186483965 | 0.873641816 |
| g Clostridium Q | g unclassified_Fungi           | -0.1167087   | 0.130757476 | 0.849249996 |
| g Clostridium Q | g Fusarium                     | -0.041631025 | 0.590977716 | 0.947252808 |
| g Clostridium Q | g Mycosphaerella               | -0.023539276 | 0.761294323 | 0.982076388 |
| g Clostridium Q | g Simplicillium                | -0.043677791 | 0.572844054 | 0.942985175 |
| g Clostridium Q | g unclassified_Cordycipitaceae | 0.171959293  | 0.02538066  | 0.765986149 |
| g Clostridium Q | g unidentified                 | -0.033731029 | 0.663291815 | 0.959259869 |
| g CAG-81        | g Verticillium                 | 0.07758271   | 0.316052974 | 0.898525398 |
| g CAG-81        | g unclassified_Tremellomycetes | 0.013339166  | 0.863335475 | 0.994526835 |
| g CAG-81        | g Candida                      | -0.091242937 | 0.238072772 | 0.874689648 |
| g CAG-81        | g Cladosporium                 | 0.018035014  | 0.815967929 | 0.991716521 |
| g CAG-81        | g Debaryomyces                 | -0.008605448 | 0.911582569 | 0.996251765 |
| g CAG-81        | g Aspergillus                  | -0.060913075 | 0.431443559 | 0.918239588 |
| g CAG-81        | g Kazachstania                 | 0.101790488  | 0.187879348 | 0.873641816 |
| g CAG-81        | g Malassezia                   | 0.015071823  | 0.845791773 | 0.994526835 |
| g CAG-81        | g unclassified_Fungi           | -0.006183178 | 0.936407849 | 0.996251765 |
| g CAG-81        | g Fusarium                     | -0.071500868 | 0.355592683 | 0.900151743 |
| g CAG-81        | g Mycosphaerella               | 0.079032527  | 0.307066759 | 0.897967316 |
| g CAG-81        | g Simplicillium                | -0.031709648 | 0.682342303 | 0.963892039 |
| g CAG-81        | g unclassified_Cordycipitaceae | 0.080843557  | 0.296079554 | 0.892181547 |
| g CAG-81        | g unidentified                 | 0.011230452  | 0.884776487 | 0.994526835 |
| g Hungatella A  | g Verticillium                 | 0.091774301  | 0.235339088 | 0.874689648 |
| g Hungatella A  | g unclassified_Tremellomycetes | 0.028943605  | 0.708737207 | 0.968657831 |
| g Hungatella A  | g Candida                      | -0.165092301 | 0.031951854 | 0.796627796 |
| g Hungatella A  | g Cladosporium                 | 0.126645711  | 0.100841298 | 0.8415005   |
| g Hungatella A  | g Debaryomyces                 | -0.105789135 | 0.171031679 | 0.867877301 |
| g Hungatella A  | g Aspergillus                  | -0.057914469 | 0.454503332 | 0.924332119 |
| g Hungatella A  | g Kazachstania                 | -0.044215062 | 0.568129069 | 0.942564508 |
| g Hungatella A  | g Malassezia                   | 0.07080565   | 0.360301506 | 0.900151743 |
| g Hungatella A  | g unclassified_Fungi           | 0.014426653  | 0.852315952 | 0.994526835 |
| g Hungatella A  | g Fusarium                     | -0.054813355 | 0.479058626 | 0.931740764 |
| g Hungatella A  | g Mycosphaerella               | -0.08933056  | 0.248094877 | 0.874689648 |
| g Hungatella A  | g Simplicillium                | -0.015790299 | 0.838538628 | 0.994526835 |
| g Hungatella A  | g unclassified_Cordycipitaceae | 0.111596634  | 0.148596929 | 0.849249996 |

|                   |                                |              |             |             |
|-------------------|--------------------------------|--------------|-------------|-------------|
| g Hungatella A    | g unidentified                 | 0.100376192  | 0.194119735 | 0.874689648 |
| g Coprococcus     | g Verticillium                 | 0.030385261  | 0.694934591 | 0.966217026 |
| g Coprococcus     | g unclassified Tremellomycetes | -0.124394193 | 0.107095245 | 0.843328451 |
| g Coprococcus     | g Candida                      | -0.115516532 | 0.134762907 | 0.849249996 |
| g Coprococcus     | g Cladosporium                 | -0.023891441 | 0.757833036 | 0.981498019 |
| g Coprococcus     | g Debaromyces                  | -0.131013818 | 0.089533186 | 0.8415005   |
| g Coprococcus     | g Aspergillus                  | 0.006420818  | 0.933969235 | 0.996251765 |
| g Coprococcus     | g Kazachstania                 | 0.082905509  | 0.283891345 | 0.8902203   |
| g Coprococcus     | g Malassezia                   | 0.026545845  | 0.731903047 | 0.973693103 |
| g Coprococcus     | g unclassified Fungi           | 0.031306241  | 0.686168822 | 0.963892039 |
| g Coprococcus     | g Fusarium                     | -0.04738999  | 0.540642659 | 0.94160936  |
| g Coprococcus     | g Mycosphaerella               | -0.001728475 | 0.982205923 | 0.998625698 |
| g Coprococcus     | g Simplicillium                | 0.078318695  | 0.311470046 | 0.897967316 |
| g Coprococcus     | g unclassified Cordycipitaceae | -0.039383963 | 0.611180592 | 0.951172976 |
| g Coprococcus     | g unidentified                 | 0.161211369  | 0.036268017 | 0.808354944 |
| g TF01-11         | g Verticillium                 | 0.036733872  | 0.635388498 | 0.954116909 |
| g TF01-11         | g unclassified Tremellomycetes | -0.038941437 | 0.615194729 | 0.951817018 |
| g TF01-11         | g Candida                      | -0.140898236 | 0.067668351 | 0.836350979 |
| g TF01-11         | g Cladosporium                 | -0.038070615 | 0.623127262 | 0.952309753 |
| g TF01-11         | g Debaromyces                  | -0.120937638 | 0.117284152 | 0.84867732  |
| g TF01-11         | g Aspergillus                  | 0.05978383   | 0.44004772  | 0.91979111  |
| g TF01-11         | g Kazachstania                 | 0.063177594  | 0.414483668 | 0.915276764 |
| g TF01-11         | g Malassezia                   | -0.059881426 | 0.439300264 | 0.91979111  |
| g TF01-11         | g unclassified Fungi           | -0.003894583 | 0.959919969 | 0.997919102 |
| g TF01-11         | g Fusarium                     | -0.145877601 | 0.058428327 | 0.832568254 |
| g TF01-11         | g Mycosphaerella               | -0.080174629 | 0.300107059 | 0.893624742 |
| g TF01-11         | g Simplicillium                | 0.05989867   | 0.43916828  | 0.91979111  |
| g TF01-11         | g unclassified Cordycipitaceae | -0.009076893 | 0.906760007 | 0.996161923 |
| g TF01-11         | g unidentified                 | 0.101697762  | 0.18828394  | 0.873641816 |
| g Agathobacter    | g Verticillium                 | -0.110101554 | 0.154147516 | 0.85006873  |
| g Agathobacter    | g unclassified Tremellomycetes | -0.069069734 | 0.372227481 | 0.901117392 |
| g Agathobacter    | g Candida                      | -0.098143801 | 0.204274443 | 0.874689648 |
| g Agathobacter    | g Cladosporium                 | -0.064833867 | 0.40233041  | 0.911928055 |
| g Agathobacter    | g Debaromyces                  | -0.096697415 | 0.211054981 | 0.874689648 |
| g Agathobacter    | g Aspergillus                  | 0.058446212  | 0.450364644 | 0.922733665 |
| g Agathobacter    | g Kazachstania                 | 0.030585896  | 0.69302148  | 0.966086731 |
| g Agathobacter    | g Malassezia                   | -0.073005981 | 0.345530845 | 0.900151743 |
| g Agathobacter    | g unclassified Fungi           | 0.054905971  | 0.478315025 | 0.931740764 |
| g Agathobacter    | g Fusarium                     | -0.075895157 | 0.326726002 | 0.899370541 |
| g Agathobacter    | g Mycosphaerella               | -0.016825039 | 0.828116736 | 0.993650851 |
| g Agathobacter    | g Simplicillium                | 0.073167216  | 0.344463742 | 0.900151743 |
| g Agathobacter    | g unclassified Cordycipitaceae | -0.114439378 | 0.138462132 | 0.849249996 |
| g Agathobacter    | g unidentified                 | 0.122564539  | 0.112398351 | 0.843328451 |
| g Eubacterium I   | g Verticillium                 | 0.008433392  | 0.913343395 | 0.996251765 |
| g Eubacterium I   | g unclassified Tremellomycetes | 0.0862229    | 0.264997907 | 0.878368327 |
| g Eubacterium I   | g Candida                      | -0.122782993 | 0.111754597 | 0.843328451 |
| g Eubacterium I   | g Cladosporium                 | 0.077296826  | 0.317844921 | 0.898525398 |
| g Eubacterium I   | g Debaromyces                  | -0.046750071 | 0.546129229 | 0.942564508 |
| g Eubacterium I   | g Aspergillus                  | -0.043903446 | 0.570862117 | 0.942564508 |
| g Eubacterium I   | g Kazachstania                 | 0.037111371  | 0.631915659 | 0.954051837 |
| g Eubacterium I   | g Malassezia                   | -0.009431728 | 0.90313252  | 0.995280411 |
| g Eubacterium I   | g unclassified Fungi           | -0.059030186 | 0.445843898 | 0.921010267 |
| g Eubacterium I   | g Fusarium                     | -0.125726412 | 0.10335904  | 0.841929371 |
| g Eubacterium I   | g Mycosphaerella               | -0.015123731 | 0.84526731  | 0.994526835 |
| g Eubacterium I   | g Simplicillium                | 0.024708217  | 0.749823886 | 0.980027605 |
| g Eubacterium I   | g unclassified Cordycipitaceae | 0.056425681  | 0.466203209 | 0.927602832 |
| g Eubacterium I   | g unidentified                 | -0.032525028 | 0.674632762 | 0.961701261 |
| g Coprococcus A   | g Verticillium                 | -0.041333272 | 0.593637198 | 0.947273049 |
| g Coprococcus A   | g unclassified Tremellomycetes | -0.116813206 | 0.130410767 | 0.849249996 |
| g Coprococcus A   | g Candida                      | -0.087045662 | 0.26044811  | 0.878368327 |
| g Coprococcus A   | g Cladosporium                 | 0.045076407  | 0.560607019 | 0.942564508 |
| g Coprococcus A   | g Debaromyces                  | -0.119549757 | 0.121581373 | 0.849176369 |
| g Coprococcus A   | g Aspergillus                  | 0.050270029  | 0.516292653 | 0.938796978 |
| g Coprococcus A   | g Kazachstania                 | 0.080361869  | 0.298976091 | 0.892417272 |
| g Coprococcus A   | g Malassezia                   | 0.054421252  | 0.482213692 | 0.932872225 |
| g Coprococcus A   | g unclassified Fungi           | 0.00602186   | 0.938063614 | 0.996251765 |
| g Coprococcus A   | g Fusarium                     | -0.113617676 | 0.141335816 | 0.849249996 |
| g Coprococcus A   | g Mycosphaerella               | -0.077781638 | 0.314809955 | 0.898525398 |
| g Coprococcus A   | g Simplicillium                | 0.096274443  | 0.21306798  | 0.874689648 |
| g Coprococcus A   | g unclassified Cordycipitaceae | -0.033507015 | 0.665392708 | 0.959776195 |
| g Coprococcus A   | g unidentified                 | 0.056317637  | 0.467058688 | 0.928418018 |
| g MGYG-HGUT-00280 | g Verticillium                 | 0.011797455  | 0.879002404 | 0.994526835 |
| g MGYG-HGUT-00280 | g unclassified Tremellomycetes | -0.000209515 | 0.997842936 | 0.999334917 |
| g MGYG-HGUT-00280 | g Candida                      | -0.110554493 | 0.15244971  | 0.84984956  |
| g MGYG-HGUT-00280 | g Cladosporium                 | 0.056988758  | 0.461758804 | 0.927602832 |
| g MGYG-HGUT-00280 | g Debaromyces                  | -0.106429575 | 0.168440898 | 0.864987015 |
| g MGYG-HGUT-00280 | g Aspergillus                  | -0.032034754 | 0.679264378 | 0.962963695 |
| g MGYG-HGUT-00280 | g Kazachstania                 | 0.064811952  | 0.402489816 | 0.911928055 |



|                   |                                |              |             |             |
|-------------------|--------------------------------|--------------|-------------|-------------|
| g MGYG-HGUT-00280 | g Malassezia                   | 0.034002832  | 0.660746257 | 0.958497637 |
| g MGYG-HGUT-00280 | g unclassified Fungi           | 0.021141337  | 0.784985353 | 0.986710331 |
| g MGYG-HGUT-00280 | g Fusarium                     | -0.027618598 | 0.721507286 | 0.971835476 |
| g MGYG-HGUT-00280 | g Mycosphaerella               | 0.097434618  | 0.207579148 | 0.874689648 |
| g MGYG-HGUT-00280 | g Simplicillium                | 0.028915524  | 0.709007022 | 0.968657831 |
| g MGYG-HGUT-00280 | g unclassified Cordycipitaceae | 0.029847217  | 0.700074481 | 0.967505184 |
| g MGYG-HGUT-00280 | g unidentified                 | 0.066680081  | 0.38903609  | 0.907127903 |
| g Blautia         | g Verticillium                 | 0.015643932  | 0.840015152 | 0.994526835 |
| g Blautia         | g unclassified Tremellomycetes | 0.119593611  | 0.121443749 | 0.849176369 |
| g Blautia         | g Candida                      | -0.077015637 | 0.319613865 | 0.898536448 |
| g Blautia         | g Cladosporium                 | -0.031061119 | 0.688497835 | 0.96434561  |
| g Blautia         | g Debaromyces                  | 0.005211123  | 0.946388829 | 0.996925697 |
| g Blautia         | g Aspergillus                  | 0.04531755   | 0.558509731 | 0.942564508 |
| g Blautia         | g Kazachstania                 | 0.001647531  | 0.983039084 | 0.998625698 |
| g Blautia         | g Malassezia                   | 0.018762407  | 0.808685352 | 0.989644655 |
| g Blautia         | g unclassified Fungi           | -0.135195608 | 0.07967856  | 0.8415005   |
| g Blautia         | g Fusarium                     | -0.071390702 | 0.356336278 | 0.900151743 |
| g Blautia         | g Mycosphaerella               | 0.002408474  | 0.975207475 | 0.998625698 |
| g Blautia         | g Simplicillium                | 0.020473798  | 0.79161679  | 0.986710331 |
| g Blautia         | g unclassified Cordycipitaceae | 0.019455959  | 0.801756843 | 0.988396129 |
| g Blautia         | g unidentified                 | -0.052161126 | 0.50061609  | 0.936281889 |
| g Coprococcus B   | g Verticillium                 | 0.142342828  | 0.064872602 | 0.836350979 |
| g Coprococcus B   | g unclassified Tremellomycetes | -0.008736619 | 0.910240447 | 0.996251765 |
| g Coprococcus B   | g Candida                      | -0.060189043 | 0.436949075 | 0.919176572 |
| g Coprococcus B   | g Cladosporium                 | 0.132376605  | 0.086220161 | 0.8415005   |
| g Coprococcus B   | g Debaromyces                  | -0.102644334 | 0.184183612 | 0.873641816 |
| g Coprococcus B   | g Aspergillus                  | 0.07897487   | 0.30742089  | 0.897967316 |
| g Coprococcus B   | g Kazachstania                 | 0.058180125  | 0.452433012 | 0.923868417 |
| g Coprococcus B   | g Malassezia                   | 0.046840546  | 0.545351859 | 0.942564508 |
| g Coprococcus B   | g unclassified Fungi           | -0.002279463 | 0.976535099 | 0.998625698 |
| g Coprococcus B   | g Fusarium                     | -0.074162389 | 0.337923569 | 0.900151743 |
| g Coprococcus B   | g Mycosphaerella               | -0.023008214 | 0.766522848 | 0.982494893 |
| g Coprococcus B   | g Simplicillium                | 0.074990049  | 0.332544897 | 0.900151743 |
| g Coprococcus B   | g unclassified Cordycipitaceae | 0.032257878  | 0.677155026 | 0.962963695 |
| g Coprococcus B   | g unidentified                 | 0.006644132  | 0.931678177 | 0.996251765 |
| g Eisenbergiella  | g Verticillium                 | 0.080131588  | 0.300367441 | 0.893624742 |
| g Eisenbergiella  | g unclassified Tremellomycetes | -0.030208177 | 0.69662474  | 0.967127531 |
| g Eisenbergiella  | g Candida                      | -0.167861177 | 0.029146248 | 0.780931419 |
| g Eisenbergiella  | g Cladosporium                 | -0.010954271 | 0.88759119  | 0.994526835 |
| g Eisenbergiella  | g Debaromyces                  | -0.136782626 | 0.076175479 | 0.8415005   |
| g Eisenbergiella  | g Aspergillus                  | -0.017232362 | 0.824022284 | 0.992484281 |
| g Eisenbergiella  | g Kazachstania                 | -0.003012354 | 0.968994    | 0.998625698 |
| g Eisenbergiella  | g Malassezia                   | 0.143562748  | 0.062585866 | 0.832568254 |
| g Eisenbergiella  | g unclassified Fungi           | -0.043626841 | 0.573293285 | 0.942985175 |
| g Eisenbergiella  | g Fusarium                     | -0.019150303 | 0.80480844  | 0.988868764 |
| g Eisenbergiella  | g Mycosphaerella               | -0.123985843 | 0.10826145  | 0.843328451 |
| g Eisenbergiella  | g Simplicillium                | 0.032046223  | 0.679155892 | 0.962963695 |
| g Eisenbergiella  | g unclassified Cordycipitaceae | 0.086174126  | 0.265269313 | 0.878368327 |
| g Eisenbergiella  | g unidentified                 | 0.050556127  | 0.513904906 | 0.938277062 |
| g UBA9502         | g Verticillium                 | -0.072580236 | 0.348358582 | 0.900151743 |
| g UBA9502         | g unclassified Tremellomycetes | 0.096047169  | 0.214155275 | 0.874689648 |
| g UBA9502         | g Candida                      | -0.020486877 | 0.79148672  | 0.986710331 |
| g UBA9502         | g Cladosporium                 | 0.013642191  | 0.86026217  | 0.994526835 |
| g UBA9502         | g Debaromyces                  | -0.0649852   | 0.401230627 | 0.910743236 |
| g UBA9502         | g Aspergillus                  | 0.014351822  | 0.85307333  | 0.994526835 |
| g UBA9502         | g Kazachstania                 | 0.122379554  | 0.112945741 | 0.843328451 |
| g UBA9502         | g Malassezia                   | -0.073819221 | 0.340169846 | 0.900151743 |
| g UBA9502         | g unclassified Fungi           | -0.082902884 | 0.283906645 | 0.8902203   |
| g UBA9502         | g Fusarium                     | -0.055285684 | 0.475272905 | 0.93028395  |
| g UBA9502         | g Mycosphaerella               | 0.025994772  | 0.737262504 | 0.976057954 |
| g UBA9502         | g Simplicillium                | -0.098865517 | 0.200950447 | 0.874689648 |
| g UBA9502         | g unclassified Cordycipitaceae | 0.006557516  | 0.932566731 | 0.996251765 |
| g UBA9502         | g unidentified                 | -0.064363344 | 0.405761254 | 0.913116876 |
| g COE1            | g Verticillium                 | 0.054663803  | 0.48026068  | 0.932425302 |
| g COE1            | g unclassified Tremellomycetes | 0.032831229  | 0.671746247 | 0.96129685  |
| g COE1            | g Candida                      | -0.170884965 | 0.02632506  | 0.765986149 |
| g COE1            | g Cladosporium                 | 0.030546137  | 0.69340044  | 0.966086731 |
| g COE1            | g Debaromyces                  | -0.148058176 | 0.054722546 | 0.832568254 |
| g COE1            | g Aspergillus                  | -0.009198328 | 0.905518346 | 0.995690688 |
| g COE1            | g Kazachstania                 | 0.056799332  | 0.463251331 | 0.927602832 |
| g COE1            | g Malassezia                   | -0.01118402  | 0.885249594 | 0.994526835 |
| g COE1            | g unclassified Fungi           | -0.041677543 | 0.590562716 | 0.947252808 |
| g COE1            | g Fusarium                     | -0.038224884 | 0.621718792 | 0.952309753 |
| g COE1            | g Mycosphaerella               | -0.068945835 | 0.373087851 | 0.901117392 |
| g COE1            | g Simplicillium                | 0.113538844  | 0.14161388  | 0.849249996 |
| g COE1            | g unclassified Cordycipitaceae | 0.02689465   | 0.728517405 | 0.973108701 |
| g COE1            | g unidentified                 | 0.037367645  | 0.629562608 | 0.95377062  |
| g MGYG-HGUT-00574 | g Verticillium                 | -0.025084377 | 0.74614424  | 0.979082173 |

|                   |                                |              |             |             |
|-------------------|--------------------------------|--------------|-------------|-------------|
| g MGYG-HGUT-00574 | g unclassified Tremellomycetes | 0.000803718  | 0.991725451 | 0.999049974 |
| g MGYG-HGUT-00574 | g Candida                      | -0.079652712 | 0.303274465 | 0.897245885 |
| g MGYG-HGUT-00574 | g Cladosporium                 | -0.014902213 | 0.847505933 | 0.994526835 |
| g MGYG-HGUT-00574 | g Debaryomyces                 | -0.086747548 | 0.262090425 | 0.878368327 |
| g MGYG-HGUT-00574 | g Aspergillus                  | -0.03182021  | 0.681294969 | 0.963631515 |
| g MGYG-HGUT-00574 | g Kazachstania                 | 0.066430762  | 0.390815762 | 0.907694413 |
| g MGYG-HGUT-00574 | g Malassezia                   | 0.048398025  | 0.532055667 | 0.940412658 |
| g MGYG-HGUT-00574 | g unclassified Fungi           | 0.028765427  | 0.710449824 | 0.968802592 |
| g MGYG-HGUT-00574 | g Fusarium                     | -0.011551675 | 0.881504549 | 0.994526835 |
| g MGYG-HGUT-00574 | g Mycosphaerella               | 0.032178202  | 0.677907978 | 0.962963695 |
| g MGYG-HGUT-00574 | g Simplicillium                | 0.009821255  | 0.89915268  | 0.995280411 |
| g MGYG-HGUT-00574 | g unclassified Cordycipitaceae | -0.017422792 | 0.822109684 | 0.992484281 |
| g MGYG-HGUT-00574 | g unidentified                 | 0.117563483  | 0.127942374 | 0.849249996 |
| g Eubacterium G   | g Verticillium                 | 0.144770051  | 0.06038824  | 0.832568254 |
| g Eubacterium G   | g unclassified Tremellomycetes | 0.060136964  | 0.437346624 | 0.91933469  |
| g Eubacterium G   | g Candida                      | -0.075703625 | 0.327951851 | 0.899370541 |
| g Eubacterium G   | g Cladosporium                 | 0.097948208  | 0.205182071 | 0.874689648 |
| g Eubacterium G   | g Debaryomyces                 | -0.135928927 | 0.07804408  | 0.8415005   |
| g Eubacterium G   | g Aspergillus                  | -0.011887025 | 0.878090852 | 0.994526835 |
| g Eubacterium G   | g Kazachstania                 | 0.039218512  | 0.612680043 | 0.951172976 |
| g Eubacterium G   | g Malassezia                   | 0.104882854  | 0.174748237 | 0.87147418  |
| g Eubacterium G   | g unclassified Fungi           | -0.125069362 | 0.105188697 | 0.841929371 |
| g Eubacterium G   | g Fusarium                     | -0.110756509 | 0.151697031 | 0.84984956  |
| g Eubacterium G   | g Mycosphaerella               | -0.011814533 | 0.878828595 | 0.994526835 |
| g Eubacterium G   | g Simplicillium                | 0.169398771  | 0.027681017 | 0.773194645 |
| g Eubacterium G   | g unclassified Cordycipitaceae | 0.074019822  | 0.33885562  | 0.900151743 |
| g Eubacterium G   | g unidentified                 | 0.060918974  | 0.431398866 | 0.918239588 |
| g Hungatella      | g Verticillium                 | 0.104131046  | 0.177876381 | 0.872371283 |
| g Hungatella      | g unclassified Tremellomycetes | 0.135913186  | 0.078078877 | 0.8415005   |
| g Hungatella      | g Candida                      | -0.051363945 | 0.507193809 | 0.936546622 |
| g Hungatella      | g Cladosporium                 | 0.030508597  | 0.693758318 | 0.966086731 |
| g Hungatella      | g Debaryomyces                 | -0.021193356 | 0.784469235 | 0.986574859 |
| g Hungatella      | g Aspergillus                  | 0.025300079  | 0.744036795 | 0.978404143 |
| g Hungatella      | g Kazachstania                 | 0.018415254  | 0.812159004 | 0.991049439 |
| g Hungatella      | g Malassezia                   | 0.034295829  | 0.658006549 | 0.956779893 |
| g Hungatella      | g unclassified Fungi           | -0.201354386 | 0.008661771 | 0.613926619 |
| g Hungatella      | g Fusarium                     | -0.097560239 | 0.206990987 | 0.874689648 |
| g Hungatella      | g Mycosphaerella               | -0.017948518 | 0.816834984 | 0.991841934 |
| g Hungatella      | g Simplicillium                | 0.007443502  | 0.923481907 | 0.996251765 |
| g Hungatella      | g unclassified Cordycipitaceae | 0.131008876  | 0.089545382 | 0.8415005   |
| g Hungatella      | g unidentified                 | -0.110770809 | 0.151643859 | 0.84984956  |
| g CAG-56          | g Verticillium                 | 0.024592897  | 0.750953095 | 0.980278684 |
| g CAG-56          | g unclassified Tremellomycetes | 0.102924113  | 0.182984314 | 0.873364345 |
| g CAG-56          | g Candida                      | -0.059654818 | 0.441036886 | 0.920204792 |
| g CAG-56          | g Cladosporium                 | 0.130744156  | 0.090200638 | 0.8415005   |
| g CAG-56          | g Debaryomyces                 | -0.109465147 | 0.156557049 | 0.852150641 |
| g CAG-56          | g Aspergillus                  | -0.009235796 | 0.905135292 | 0.995657731 |
| g CAG-56          | g Kazachstania                 | 0.069820589  | 0.367039549 | 0.901117392 |
| g CAG-56          | g Malassezia                   | 0.067753793  | 0.381427793 | 0.90490297  |
| g CAG-56          | g unclassified Fungi           | -0.024322766 | 0.753600276 | 0.980575998 |
| g CAG-56          | g Fusarium                     | -0.12809217  | 0.096978113 | 0.8415005   |
| g CAG-56          | g Mycosphaerella               | -0.065773943 | 0.395527635 | 0.909025558 |
| g CAG-56          | g Simplicillium                | 0.113504783  | 0.141734153 | 0.849249996 |
| g CAG-56          | g unclassified Cordycipitaceae | 0.036475878  | 0.637766527 | 0.954425625 |
| g CAG-56          | g unidentified                 | 0.002370853  | 0.975594611 | 0.998625698 |
| g UBA7182         | g Verticillium                 | -0.014296673 | 0.853631582 | 0.994526835 |
| g UBA7182         | g unclassified Tremellomycetes | -0.078336683 | 0.311358582 | 0.897967316 |
| g UBA7182         | g Candida                      | -0.209205636 | 0.006337998 | 0.613926619 |
| g UBA7182         | g Cladosporium                 | -0.014772653 | 0.848815806 | 0.994526835 |
| g UBA7182         | g Debaryomyces                 | -0.156692579 | 0.041904217 | 0.808354944 |
| g UBA7182         | g Aspergillus                  | 0.060613928  | 0.433713418 | 0.918239588 |
| g UBA7182         | g Kazachstania                 | 0.022622487  | 0.770327125 | 0.984081703 |
| g UBA7182         | g Malassezia                   | 0.062151891  | 0.42211666  | 0.916999262 |
| g UBA7182         | g unclassified Fungi           | 0.087033768  | 0.2605135   | 0.878368327 |
| g UBA7182         | g Fusarium                     | -0.082718842 | 0.28498067  | 0.891214772 |
| g UBA7182         | g Mycosphaerella               | -0.121371817 | 0.115964377 | 0.845352813 |
| g UBA7182         | g Simplicillium                | 0.116715844  | 0.130733752 | 0.849249996 |
| g UBA7182         | g unclassified Cordycipitaceae | 0.034413926  | 0.656903558 | 0.956614192 |
| g UBA7182         | g unidentified                 | 0.091395687  | 0.237284663 | 0.874689648 |
| g CAG-303         | g Verticillium                 | -0.010036111 | 0.89695855  | 0.995280411 |
| g CAG-303         | g unclassified Tremellomycetes | 0.051317475  | 0.507578631 | 0.936546622 |
| g CAG-303         | g Candida                      | -0.04767223  | 0.538231479 | 0.941323418 |
| g CAG-303         | g Cladosporium                 | 0.136623597  | 0.076520799 | 0.8415005   |
| g CAG-303         | g Debaryomyces                 | -0.108626499 | 0.159775382 | 0.859887758 |
| g CAG-303         | g Aspergillus                  | -0.011297599 | 0.88409237  | 0.994526835 |
| g CAG-303         | g Kazachstania                 | 0.013196299  | 0.864785157 | 0.994526835 |
| g CAG-303         | g Malassezia                   | -0.001432578 | 0.985251697 | 0.999049974 |
| g CAG-303         | g unclassified Fungi           | 0.022170104  | 0.774795798 | 0.984510076 |

|                    |                                |              |             |             |
|--------------------|--------------------------------|--------------|-------------|-------------|
| g CAG-303          | g Fusarium                     | -0.116663586 | 0.130907363 | 0.849249996 |
| g CAG-303          | g Mycosphaerella               | -0.058018192 | 0.453694369 | 0.924218204 |
| g CAG-303          | g Simplicillium                | 0.071240818  | 0.357349522 | 0.900151743 |
| g CAG-303          | g unclassified Cordycipitaceae | -0.023599083 | 0.760706161 | 0.982076388 |
| g CAG-303          | g unidentified                 | 0.01641644   | 0.83222867  | 0.994526835 |
| g UBA4285          | g Verticillium                 | 0.079967903  | 0.301359011 | 0.895150751 |
| g UBA4285          | g unclassified Tremellomycetes | -0.041549402 | 0.591706219 | 0.947273049 |
| g UBA4285          | g Candida                      | -0.125569766 | 0.103792951 | 0.841929371 |
| g UBA4285          | g Cladosporium                 | 0.043185341  | 0.577183821 | 0.943618965 |
| g UBA4285          | g Debaromyces                  | -0.156821158 | 0.041734237 | 0.808354944 |
| g UBA4285          | g Aspergillus                  | 0.015466505  | 0.841805744 | 0.994526835 |
| g UBA4285          | g Kazachstania                 | -0.007072794 | 0.927281977 | 0.996251765 |
| g UBA4285          | g Malassezia                   | 0.07735157   | 0.317501268 | 0.898525398 |
| g UBA4285          | g unclassified Fungi           | 0.053310859  | 0.491208895 | 0.932872225 |
| g UBA4285          | g Fusarium                     | 0.053210364  | 0.492027381 | 0.933370788 |
| g UBA4285          | g Mycosphaerella               | -0.071440374 | 0.356000887 | 0.900151743 |
| g UBA4285          | g Simplicillium                | 0.098646496  | 0.201955027 | 0.874689648 |
| g UBA4285          | g unclassified Cordycipitaceae | 0.012913176  | 0.867659344 | 0.994526835 |
| g UBA4285          | g unidentified                 | 0.068187001  | 0.378383894 | 0.904750985 |
| g MGYG-HGUT-00141  | g Verticillium                 | 0.040356424  | 0.602400122 | 0.950204056 |
| g MGYG-HGUT-00141  | g unclassified Tremellomycetes | 0.016718499  | 0.829188456 | 0.993650851 |
| g MGYG-HGUT-00141  | g Candida                      | -0.138375685 | 0.072785334 | 0.8415005   |
| g MGYG-HGUT-00141  | g Cladosporium                 | 0.108348813  | 0.160851859 | 0.859887758 |
| g MGYG-HGUT-00141  | g Debaromyces                  | -0.113543872 | 0.141596132 | 0.849249996 |
| g MGYG-HGUT-00141  | g Aspergillus                  | -0.063536257 | 0.411833809 | 0.913695764 |
| g MGYG-HGUT-00141  | g Kazachstania                 | 0.073690258  | 0.341016446 | 0.900151743 |
| g MGYG-HGUT-00141  | g Malassezia                   | 0.067977855  | 0.379851587 | 0.90490297  |
| g MGYG-HGUT-00141  | g unclassified Fungi           | 0.086622637  | 0.262780666 | 0.878368327 |
| g MGYG-HGUT-00141  | g Fusarium                     | -0.109484732 | 0.156482479 | 0.852150641 |
| g MGYG-HGUT-00141  | g Mycosphaerella               | 0.015286053  | 0.843627699 | 0.994526835 |
| g MGYG-HGUT-00141  | g Simplicillium                | 0.032780646  | 0.672222755 | 0.96129685  |
| g MGYG-HGUT-00141  | g unclassified Cordycipitaceae | 0.061402843  | 0.427742079 | 0.918239588 |
| g MGYG-HGUT-00141  | g unidentified                 | 0.08111683   | 0.294444579 | 0.892181547 |
| g GCA-900066755    | g Verticillium                 | 0.106428771  | 0.168444132 | 0.864987015 |
| g GCA-900066755    | g unclassified Tremellomycetes | 0.006835253  | 0.929717847 | 0.996251765 |
| g GCA-900066755    | g Candida                      | -0.084586208 | 0.274209234 | 0.886621424 |
| g GCA-900066755    | g Cladosporium                 | 0.007350891  | 0.924431085 | 0.996251765 |
| g GCA-900066755    | g Debaromyces                  | -0.113634304 | 0.141277217 | 0.849249996 |
| g GCA-900066755    | g Aspergillus                  | 0.001215633  | 0.987484939 | 0.999049974 |
| g GCA-900066755    | g Kazachstania                 | 0.092798647  | 0.230131473 | 0.874689648 |
| g GCA-900066755    | g Malassezia                   | 0.102570175  | 0.184502466 | 0.873641816 |
| g GCA-900066755    | g unclassified Fungi           | -0.108070437 | 0.161936454 | 0.859887758 |
| g GCA-900066755    | g Fusarium                     | -0.09393792  | 0.224435585 | 0.874689648 |
| g GCA-900066755    | g Mycosphaerella               | -0.029088146 | 0.707348985 | 0.96831002  |
| g GCA-900066755    | g Simplicillium                | 0.028488701  | 0.713112533 | 0.969950794 |
| g GCA-900066755    | g unclassified Cordycipitaceae | 0.093756384  | 0.22533644  | 0.874689648 |
| g GCA-900066755    | g unidentified                 | 0.091828488  | 0.235061553 | 0.874689648 |
| g CAG-95           | g Verticillium                 | -0.027143069 | 0.726109349 | 0.972631421 |
| g CAG-95           | g unclassified Tremellomycetes | -0.051652695 | 0.504806086 | 0.936546622 |
| g CAG-95           | g Candida                      | -0.1430226   | 0.063590088 | 0.835729559 |
| g CAG-95           | g Cladosporium                 | 0.006399903  | 0.934183829 | 0.996251765 |
| g CAG-95           | g Debaromyces                  | -0.102246779 | 0.185897675 | 0.873641816 |
| g CAG-95           | g Aspergillus                  | 0.025538191  | 0.741712609 | 0.977585637 |
| g CAG-95           | g Kazachstania                 | -0.047066395 | 0.543413696 | 0.942564508 |
| g CAG-95           | g Malassezia                   | 0.001263275  | 0.986994501 | 0.999049974 |
| g CAG-95           | g unclassified Fungi           | -0.051646464 | 0.504857545 | 0.936546622 |
| g CAG-95           | g Fusarium                     | -0.049994935 | 0.518593918 | 0.939250598 |
| g CAG-95           | g Mycosphaerella               | -0.07564784  | 0.328309441 | 0.899370541 |
| g CAG-95           | g Simplicillium                | 0.081673415  | 0.291133157 | 0.892181547 |
| g CAG-95           | g unclassified Cordycipitaceae | -0.011111128 | 0.885992401 | 0.994526835 |
| g CAG-95           | g unidentified                 | 0.088836986  | 0.250728346 | 0.874689648 |
| g Fusicatenibacter | g Verticillium                 | 0.040704906  | 0.599267401 | 0.948505925 |
| g Fusicatenibacter | g unclassified Tremellomycetes | 0.138009739  | 0.073553063 | 0.8415005   |
| g Fusicatenibacter | g Candida                      | 0.006654042  | 0.931576519 | 0.996251765 |
| g Fusicatenibacter | g Cladosporium                 | 0.04076172   | 0.598757361 | 0.948266952 |
| g Fusicatenibacter | g Debaromyces                  | 0.000444162  | 0.995427147 | 0.999049974 |
| g Fusicatenibacter | g Aspergillus                  | 0.103034198  | 0.182513997 | 0.872371283 |
| g Fusicatenibacter | g Kazachstania                 | 0.121080981  | 0.116847147 | 0.847040293 |
| g Fusicatenibacter | g Malassezia                   | 0.054703769  | 0.479939288 | 0.932202453 |
| g Fusicatenibacter | g unclassified Fungi           | -0.054068758 | 0.485059561 | 0.932872225 |
| g Fusicatenibacter | g Fusarium                     | -0.00626178  | 0.935601189 | 0.996251765 |
| g Fusicatenibacter | g Mycosphaerella               | 0.006646189  | 0.93165708  | 0.996251765 |
| g Fusicatenibacter | g Simplicillium                | 0.090444229  | 0.242223523 | 0.874689648 |
| g Fusicatenibacter | g unclassified Cordycipitaceae | 0.087401056  | 0.25849948  | 0.878368327 |
| g Fusicatenibacter | g unidentified                 | -0.048886072 | 0.527922954 | 0.940363396 |
| g Ruminococcus A   | g Verticillium                 | -0.035275327 | 0.6488808   | 0.955501166 |
| g Ruminococcus A   | g unclassified Tremellomycetes | 0.044239875  | 0.567911705 | 0.942564508 |
| g Ruminococcus A   | g Candida                      | -0.043235791 | 0.576738626 | 0.943618965 |

|                   |                                |              |             |             |
|-------------------|--------------------------------|--------------|-------------|-------------|
| g Ruminococcus A  | g Cladosporium                 | 0.032518183  | 0.674697342 | 0.961701261 |
| g Ruminococcus A  | g Debaryomyces                 | 0.027051555  | 0.726996128 | 0.972631421 |
| g Ruminococcus A  | g Aspergillus                  | 0.034739896  | 0.653862922 | 0.956331535 |
| g Ruminococcus A  | g Kazachstania                 | 0.020370413  | 0.792645184 | 0.986710331 |
| g Ruminococcus A  | g Malassezia                   | 0.03343183   | 0.66609841  | 0.959776195 |
| g Ruminococcus A  | g unclassified Fungi           | -0.031759003 | 0.681874697 | 0.963892039 |
| g Ruminococcus A  | g Fusarium                     | -0.020034688 | 0.795987177 | 0.987463135 |
| g Ruminococcus A  | g Mycosphaerella               | -0.107993408 | 0.162237536 | 0.859887758 |
| g Ruminococcus A  | g Simplicillium                | 0.038130714  | 0.622578393 | 0.952309753 |
| g Ruminococcus A  | g unclassified Cordycipitaceae | 0.013812175  | 0.858539094 | 0.994526835 |
| g Ruminococcus A  | g unidentified                 | 0.012623029  | 0.870606651 | 0.994526835 |
| g CAG-127         | g Verticillium                 | 0.062504     | 0.419487205 | 0.916661525 |
| g CAG-127         | g unclassified Tremellomycetes | -0.139104472 | 0.07127575  | 0.8415005   |
| g CAG-127         | g Candida                      | -0.084532349 | 0.274515991 | 0.886794304 |
| g CAG-127         | g Cladosporium                 | 0.029403039  | 0.704327966 | 0.967508066 |
| g CAG-127         | g Debaryomyces                 | -0.127324934 | 0.099012369 | 0.8415005   |
| g CAG-127         | g Aspergillus                  | 0.07454117   | 0.335455169 | 0.900151743 |
| g CAG-127         | g Kazachstania                 | 0.045907004  | 0.553399065 | 0.942564508 |
| g CAG-127         | g Malassezia                   | 0.042504883  | 0.583204096 | 0.945010741 |
| g CAG-127         | g unclassified Fungi           | 0.11605957   | 0.132926915 | 0.849249996 |
| g CAG-127         | g Fusarium                     | -0.11578583  | 0.133850006 | 0.849249996 |
| g CAG-127         | g Mycosphaerella               | -0.084169216 | 0.276590312 | 0.888419029 |
| g CAG-127         | g Simplicillium                | -0.027560834 | 0.722065784 | 0.971954906 |
| g CAG-127         | g unclassified Cordycipitaceae | -0.037040872 | 0.632563614 | 0.954068873 |
| g CAG-127         | g unidentified                 | 0.098585983  | 0.202233222 | 0.874689648 |
| g CAG-411         | g Verticillium                 | -0.01140766  | 0.882971223 | 0.994526835 |
| g CAG-411         | g unclassified Tremellomycetes | -0.131367086 | 0.088664767 | 0.8415005   |
| g CAG-411         | g Candida                      | 0.057779065  | 0.455566066 | 0.924332119 |
| g CAG-411         | g Cladosporium                 | -0.072709477 | 0.347498644 | 0.900151743 |
| g CAG-411         | g Debaryomyces                 | 0.014145645  | 0.85516077  | 0.994526835 |
| g CAG-411         | g Aspergillus                  | 0.164288935  | 0.032807607 | 0.80715461  |
| g CAG-411         | g Kazachstania                 | 0.007669504  | 0.92116603  | 0.996251765 |
| g CAG-411         | g Malassezia                   | -0.028144724 | 0.716427167 | 0.97067915  |
| g CAG-411         | g unclassified Fungi           | 0.166589061  | 0.030408012 | 0.785838437 |
| g CAG-411         | g Fusarium                     | -0.112910962 | 0.143843501 | 0.849249996 |
| g CAG-411         | g Mycosphaerella               | 0.061965462  | 0.423512725 | 0.918013177 |
| g CAG-411         | g Simplicillium                | -0.018372899 | 0.812583069 | 0.991049439 |
| g CAG-411         | g unclassified Cordycipitaceae | -0.177114771 | 0.021242476 | 0.742360151 |
| g CAG-411         | g unidentified                 | 0.145696581  | 0.058745032 | 0.832568254 |
| g Anaerostipes    | g Verticillium                 | -0.03816638  | 0.622252769 | 0.952309753 |
| g Anaerostipes    | g unclassified Tremellomycetes | 0.101334388  | 0.189875591 | 0.87460258  |
| g Anaerostipes    | g Candida                      | -0.065156514 | 0.399987807 | 0.910058571 |
| g Anaerostipes    | g Cladosporium                 | 0.042260624  | 0.585372199 | 0.946153453 |
| g Anaerostipes    | g Debaryomyces                 | 0.073268903  | 0.343791813 | 0.900151743 |
| g Anaerostipes    | g Aspergillus                  | -0.019916256 | 0.797167001 | 0.987463135 |
| g Anaerostipes    | g Kazachstania                 | 0.093503601  | 0.226595107 | 0.874689648 |
| g Anaerostipes    | g Malassezia                   | -0.0391411   | 0.613382168 | 0.951172976 |
| g Anaerostipes    | g unclassified Fungi           | -0.163319412 | 0.033866175 | 0.808354944 |
| g Anaerostipes    | g Fusarium                     | -0.043096378 | 0.577969262 | 0.943818057 |
| g Anaerostipes    | g Mycosphaerella               | -0.020380836 | 0.792541488 | 0.986710331 |
| g Anaerostipes    | g Simplicillium                | 0.013566859  | 0.861026002 | 0.994526835 |
| g Anaerostipes    | g unclassified Cordycipitaceae | -0.017869346 | 0.817628804 | 0.991841934 |
| g Anaerostipes    | g unidentified                 | -0.087525414 | 0.257819991 | 0.878053611 |
| g KLE1615         | g Verticillium                 | 0.070137521  | 0.364863216 | 0.901117392 |
| g KLE1615         | g unclassified Tremellomycetes | 0.028746462  | 0.710632198 | 0.968802592 |
| g KLE1615         | g Candida                      | -0.092061712 | 0.233869665 | 0.874689648 |
| g KLE1615         | g Cladosporium                 | 0.029189725  | 0.706373957 | 0.96831002  |
| g KLE1615         | g Debaryomyces                 | 0.01163346   | 0.880671815 | 0.994526835 |
| g KLE1615         | g Aspergillus                  | -0.090756241 | 0.240596089 | 0.874689648 |
| g KLE1615         | g Kazachstania                 | 0.054169728  | 0.484243458 | 0.932872225 |
| g KLE1615         | g Malassezia                   | 0.061357752  | 0.428082097 | 0.918239588 |
| g KLE1615         | g unclassified Fungi           | 0.044488899  | 0.565732487 | 0.942564508 |
| g KLE1615         | g Fusarium                     | -0.058988175 | 0.446168256 | 0.921010267 |
| g KLE1615         | g Mycosphaerella               | -0.070991439 | 0.359039342 | 0.900151743 |
| g KLE1615         | g Simplicillium                | 0.03920469   | 0.612805381 | 0.951172976 |
| g KLE1615         | g unclassified Cordycipitaceae | 0.041258856  | 0.594302717 | 0.947273049 |
| g KLE1615         | g unidentified                 | 0.00944108   | 0.903036943 | 0.995280411 |
| g MGYG-HGUT-00202 | g Verticillium                 | 0.128925584  | 0.094806069 | 0.8415005   |
| g MGYG-HGUT-00202 | g unclassified Tremellomycetes | -0.06697379  | 0.38694583  | 0.906305988 |
| g MGYG-HGUT-00202 | g Candida                      | -0.14643668  | 0.057459049 | 0.832568254 |
| g MGYG-HGUT-00202 | g Cladosporium                 | -0.111696519 | 0.148231561 | 0.849249996 |
| g MGYG-HGUT-00202 | g Debaryomyces                 | -0.108363957 | 0.160793013 | 0.859887758 |
| g MGYG-HGUT-00202 | g Aspergillus                  | -0.05081885  | 0.511717274 | 0.938061907 |
| g MGYG-HGUT-00202 | g Kazachstania                 | 0.037196942  | 0.631129546 | 0.954051837 |
| g MGYG-HGUT-00202 | g Malassezia                   | 0.054589955  | 0.48085485  | 0.932872225 |
| g MGYG-HGUT-00202 | g unclassified Fungi           | -0.070916766 | 0.359546308 | 0.900151743 |
| g MGYG-HGUT-00202 | g Fusarium                     | -0.124206524 | 0.107629976 | 0.843328451 |
| g MGYG-HGUT-00202 | g Mycosphaerella               | -0.050364221 | 0.515505903 | 0.938796978 |



|                   |                                       |              |             |             |
|-------------------|---------------------------------------|--------------|-------------|-------------|
| g MGYG-HGUT-00202 | g <i>Simplicillium</i>                | 0.073720023  | 0.340820931 | 0.900151743 |
| g MGYG-HGUT-00202 | g unclassified <i>Cordycipitaceae</i> | 0.084069328  | 0.277162751 | 0.888809018 |
| g MGYG-HGUT-00202 | g unidentified                        | 0.075785284  | 0.327428856 | 0.899370541 |
| g MGYG-HGUT-00164 | g <i>Verticillium</i>                 | 0.034587166  | 0.655286875 | 0.956614192 |
| g MGYG-HGUT-00164 | g unclassified <i>Tremellomycetes</i> | 0.135114036  | 0.079862065 | 0.8415005   |
| g MGYG-HGUT-00164 | g <i>Candida</i>                      | -0.167594666 | 0.029406828 | 0.782890491 |
| g MGYG-HGUT-00164 | g <i>Cladosporium</i>                 | 0.041344992  | 0.593532419 | 0.947273049 |
| g MGYG-HGUT-00164 | g <i>Debaryomyces</i>                 | -0.049283904 | 0.524566206 | 0.939740222 |
| g MGYG-HGUT-00164 | g <i>Aspergillus</i>                  | -0.088548999 | 0.252273804 | 0.874689648 |
| g MGYG-HGUT-00164 | g <i>Kazachstania</i>                 | 0.118302982  | 0.125544826 | 0.849176369 |
| g MGYG-HGUT-00164 | g <i>Malassezia</i>                   | -0.004613301 | 0.952531468 | 0.99717368  |
| g MGYG-HGUT-00164 | g unclassified <i>Fungi</i>           | -0.17188544  | 0.025444638 | 0.765986149 |
| g MGYG-HGUT-00164 | g <i>Fusarium</i>                     | -0.130091747 | 0.091831862 | 0.8415005   |
| g MGYG-HGUT-00164 | g <i>Mycosphaerella</i>               | -0.150358062 | 0.05102669  | 0.832568254 |
| g MGYG-HGUT-00164 | g <i>Simplicillium</i>                | -0.041858654 | 0.588948238 | 0.947252808 |
| g MGYG-HGUT-00164 | g unclassified <i>Cordycipitaceae</i> | 0.049833544  | 0.519946461 | 0.939488064 |
| g MGYG-HGUT-00164 | g unidentified                        | -0.069157746 | 0.371617055 | 0.901117392 |
| g CAG-45          | g <i>Verticillium</i>                 | 0.001769827  | 0.981780289 | 0.998625698 |
| g CAG-45          | g unclassified <i>Tremellomycetes</i> | -0.097554077 | 0.207019807 | 0.874689648 |
| g CAG-45          | g <i>Candida</i>                      | -0.141763782 | 0.065981685 | 0.836350979 |
| g CAG-45          | g <i>Cladosporium</i>                 | 0.075524452  | 0.329101276 | 0.899622647 |
| g CAG-45          | g <i>Debaryomyces</i>                 | -0.101850827 | 0.187616413 | 0.873641816 |
| g CAG-45          | g <i>Aspergillus</i>                  | 0.020253534  | 0.793808236 | 0.986752194 |
| g CAG-45          | g <i>Kazachstania</i>                 | -0.045971236 | 0.552843539 | 0.942564508 |
| g CAG-45          | g <i>Malassezia</i>                   | 0.041847653  | 0.589046248 | 0.947252808 |
| g CAG-45          | g unclassified <i>Fungi</i>           | 0.006015071  | 0.938133296 | 0.996251765 |
| g CAG-45          | g <i>Fusarium</i>                     | -0.163437459 | 0.033735758 | 0.808354944 |
| g CAG-45          | g <i>Mycosphaerella</i>               | -0.111901287 | 0.147484667 | 0.849249996 |
| g CAG-45          | g <i>Simplicillium</i>                | 0.080343163  | 0.299088953 | 0.892429947 |
| g CAG-45          | g unclassified <i>Cordycipitaceae</i> | -0.009838461 | 0.89897695  | 0.995280411 |
| g CAG-45          | g unidentified                        | 0.075784987  | 0.327430753 | 0.899370541 |
| g Eubacterium E   | g <i>Verticillium</i>                 | 0.073211337  | 0.344172099 | 0.900151743 |
| g Eubacterium E   | g unclassified <i>Tremellomycetes</i> | 0.00191203   | 0.980316639 | 0.998625698 |
| g Eubacterium E   | g <i>Candida</i>                      | -0.08805454  | 0.2549426   | 0.874689648 |
| g Eubacterium E   | g <i>Cladosporium</i>                 | -0.058870981 | 0.447073812 | 0.921103839 |
| g Eubacterium E   | g <i>Debaryomyces</i>                 | 0.025907064  | 0.738116683 | 0.976420387 |
| g Eubacterium E   | g <i>Aspergillus</i>                  | 0.020417331  | 0.79217844  | 0.986710331 |
| g Eubacterium E   | g <i>Kazachstania</i>                 | 0.130511111  | 0.09078065  | 0.8415005   |
| g Eubacterium E   | g <i>Malassezia</i>                   | 0.020561471  | 0.79074497  | 0.986710331 |
| g Eubacterium E   | g unclassified <i>Fungi</i>           | -0.036396611 | 0.638497907 | 0.954900582 |
| g Eubacterium E   | g <i>Fusarium</i>                     | 0.007607416  | 0.921802194 | 0.996251765 |
| g Eubacterium E   | g <i>Mycosphaerella</i>               | -0.076027973 | 0.325877682 | 0.899370541 |
| g Eubacterium E   | g <i>Simplicillium</i>                | 0.077649123  | 0.315637634 | 0.898525398 |
| g Eubacterium E   | g unclassified <i>Cordycipitaceae</i> | -0.013625285 | 0.860433577 | 0.994526835 |
| g Eubacterium E   | g unidentified                        | -0.048761895 | 0.528972931 | 0.940412658 |
| g UBA5416         | g <i>Verticillium</i>                 | 0.015140882  | 0.845094035 | 0.994526835 |
| g UBA5416         | g unclassified <i>Tremellomycetes</i> | 0.149937755  | 0.051686202 | 0.832568254 |
| g UBA5416         | g <i>Candida</i>                      | -0.01190123  | 0.877946299 | 0.994526835 |
| g UBA5416         | g <i>Cladosporium</i>                 | 0.016805302  | 0.828315249 | 0.993650851 |
| g UBA5416         | g <i>Debaryomyces</i>                 | -0.023545584 | 0.76123228  | 0.982076388 |
| g UBA5416         | g <i>Aspergillus</i>                  | -0.020748338 | 0.788887626 | 0.986710331 |
| g UBA5416         | g <i>Kazachstania</i>                 | 0.017971135  | 0.816608246 | 0.991841934 |
| g UBA5416         | g <i>Malassezia</i>                   | -0.05894322  | 0.446515502 | 0.921010267 |
| g UBA5416         | g unclassified <i>Fungi</i>           | -0.105663748 | 0.17154235  | 0.867877301 |
| g UBA5416         | g <i>Fusarium</i>                     | -0.076517915 | 0.322760625 | 0.89909104  |
| g UBA5416         | g <i>Mycosphaerella</i>               | 0.140178436  | 0.069097629 | 0.836518447 |
| g UBA5416         | g <i>Simplicillium</i>                | -0.142566919 | 0.064447496 | 0.836350979 |
| g UBA5416         | g unclassified <i>Cordycipitaceae</i> | 0.099325794  | 0.198851087 | 0.874689648 |
| g UBA5416         | g unidentified                        | -0.075050396 | 0.332154875 | 0.900151743 |
| g GCA-900066575   | g <i>Verticillium</i>                 | 0.022710831  | 0.769455343 | 0.98374619  |
| g GCA-900066575   | g unclassified <i>Tremellomycetes</i> | -0.000516391 | 0.994683525 | 0.999049974 |
| g GCA-900066575   | g <i>Candida</i>                      | -0.097544276 | 0.207065656 | 0.874689648 |
| g GCA-900066575   | g <i>Cladosporium</i>                 | 0.05773303   | 0.455920369 | 0.924332119 |
| g GCA-900066575   | g <i>Debaryomyces</i>                 | -0.123406257 | 0.109933759 | 0.843328451 |
| g GCA-900066575   | g <i>Aspergillus</i>                  | -0.05193068  | 0.502512934 | 0.936281889 |
| g GCA-900066575   | g <i>Kazachstania</i>                 | 0.044844743  | 0.562625413 | 0.942564508 |
| g GCA-900066575   | g <i>Malassezia</i>                   | 0.133722429  | 0.083045408 | 0.8415005   |
| g GCA-900066575   | g unclassified <i>Fungi</i>           | -0.057396734 | 0.458553329 | 0.925683065 |
| g GCA-900066575   | g <i>Fusarium</i>                     | -0.011184102 | 0.88524876  | 0.994526835 |
| g GCA-900066575   | g <i>Mycosphaerella</i>               | -0.08906761  | 0.249495456 | 0.874689648 |
| g GCA-900066575   | g <i>Simplicillium</i>                | 0.083717898  | 0.279183088 | 0.889320764 |
| g GCA-900066575   | g unclassified <i>Cordycipitaceae</i> | 0.09619865   | 0.213430138 | 0.874689648 |
| g GCA-900066575   | g unidentified                        | -0.001148182 | 0.988179306 | 0.999049974 |
| g CHH4-2          | g <i>Verticillium</i>                 | 0.160725147  | 0.036841976 | 0.808354944 |
| g CHH4-2          | g unclassified <i>Tremellomycetes</i> | 0.018264639  | 0.813667212 | 0.991049439 |
| g CHH4-2          | g <i>Candida</i>                      | -0.145298697 | 0.059446118 | 0.832568254 |
| g CHH4-2          | g <i>Cladosporium</i>                 | 0.01293564   | 0.867431232 | 0.994526835 |
| g CHH4-2          | g <i>Debaryomyces</i>                 | -0.113509228 | 0.141718452 | 0.849249996 |

|                   |                                |              |             |             |
|-------------------|--------------------------------|--------------|-------------|-------------|
| g CHH4-2          | g Aspergillus                  | 0.005461349  | 0.943818671 | 0.996925697 |
| g CHH4-2          | g Kazachstania                 | -0.059414364 | 0.442883862 | 0.920488062 |
| g CHH4-2          | g Malassezia                   | 0.079848487  | 0.302083775 | 0.896412022 |
| g CHH4-2          | g unclassified_Fungi           | -0.081008565 | 0.295091605 | 0.892181547 |
| g CHH4-2          | g Fusarium                     | -0.082791362 | 0.284557138 | 0.890975405 |
| g CHH4-2          | g Mycosphaerella               | -0.003518882 | 0.963783621 | 0.998529304 |
| g CHH4-2          | g Simplicillium                | 0.061509192  | 0.426940762 | 0.918239588 |
| g CHH4-2          | g unclassified_Cordycipitaceae | 0.208013172  | 0.006650578 | 0.613926619 |
| g CHH4-2          | g unidentified                 | 0.100031205  | 0.195664556 | 0.874689648 |
| g GCA-900066135   | g Verticillium                 | -0.04241253  | 0.584023406 | 0.945124317 |
| g GCA-900066135   | g unclassified_Tremellomycetes | -0.007765067 | 0.920186982 | 0.996251765 |
| g GCA-900066135   | g Candida                      | -0.051703056 | 0.504390243 | 0.936546622 |
| g GCA-900066135   | g Cladosporium                 | 0.095904316  | 0.214840719 | 0.874689648 |
| g GCA-900066135   | g Debaryomyces                 | -0.026495327 | 0.732393823 | 0.973693103 |
| g GCA-900066135   | g Aspergillus                  | 0.037376163  | 0.629484462 | 0.95377062  |
| g GCA-900066135   | g Kazachstania                 | 0.082962164  | 0.283561278 | 0.8902203   |
| g GCA-900066135   | g Malassezia                   | 0.011558691  | 0.881433103 | 0.994526835 |
| g GCA-900066135   | g unclassified_Fungi           | 0.021869292  | 0.777771337 | 0.984728744 |
| g GCA-900066135   | g Fusarium                     | -0.039243941 | 0.612449479 | 0.951172976 |
| g GCA-900066135   | g Mycosphaerella               | -0.137943174 | 0.073693415 | 0.8415005   |
| g GCA-900066135   | g Simplicillium                | 0.069704527  | 0.367838528 | 0.901117392 |
| g GCA-900066135   | g unclassified_Cordycipitaceae | -0.048962597 | 0.527276427 | 0.940363396 |
| g GCA-900066135   | g unidentified                 | 0.04408352   | 0.569282004 | 0.942564508 |
| g Tyzzerella      | g Verticillium                 | 0.003694404  | 0.96197847  | 0.998263857 |
| g Tyzzerella      | g unclassified_Tremellomycetes | 0.176913972  | 0.021392019 | 0.742601833 |
| g Tyzzerella      | g Candida                      | -0.03706352  | 0.632355422 | 0.954068873 |
| g Tyzzerella      | g Cladosporium                 | -0.0320339   | 0.679272461 | 0.962963695 |
| g Tyzzerella      | g Debaryomyces                 | 0.086316166  | 0.264479445 | 0.878368327 |
| g Tyzzerella      | g Aspergillus                  | 0.028005683  | 0.717768507 | 0.97067915  |
| g Tyzzerella      | g Kazachstania                 | 0.058371708  | 0.450943251 | 0.923451876 |
| g Tyzzerella      | g Malassezia                   | 0.069226043  | 0.371143789 | 0.901117392 |
| g Tyzzerella      | g unclassified_Fungi           | -0.149149893 | 0.052941494 | 0.832568254 |
| g Tyzzerella      | g Fusarium                     | -0.093919532 | 0.224526721 | 0.874689648 |
| g Tyzzerella      | g Mycosphaerella               | 0.035604691  | 0.645823808 | 0.955501166 |
| g Tyzzerella      | g Simplicillium                | -0.06465165  | 0.403657005 | 0.912338681 |
| g Tyzzerella      | g unclassified_Cordycipitaceae | -0.018703476 | 0.809274765 | 0.989767396 |
| g Tyzzerella      | g unidentified                 | -0.200946344 | 0.008800928 | 0.613926619 |
| g UBA7096         | g Verticillium                 | 0.083732087  | 0.279101326 | 0.889320764 |
| g UBA7096         | g unclassified_Tremellomycetes | 0.055876817  | 0.470557983 | 0.928769554 |
| g UBA7096         | g Candida                      | -0.08688424  | 0.261336507 | 0.878368327 |
| g UBA7096         | g Cladosporium                 | 0.030307663  | 0.695675024 | 0.966639149 |
| g UBA7096         | g Debaryomyces                 | -0.117389588 | 0.128511254 | 0.849249996 |
| g UBA7096         | g Aspergillus                  | -0.098418025 | 0.203006816 | 0.874689648 |
| g UBA7096         | g Kazachstania                 | 0.062204373  | 0.421724133 | 0.916999262 |
| g UBA7096         | g Malassezia                   | 0.09675779   | 0.210768759 | 0.874689648 |
| g UBA7096         | g unclassified_Fungi           | -0.196602949 | 0.010409429 | 0.613926619 |
| g UBA7096         | g Fusarium                     | -0.171113859 | 0.026121364 | 0.765986149 |
| g UBA7096         | g Mycosphaerella               | 0.049224464  | 0.525067051 | 0.939740222 |
| g UBA7096         | g Simplicillium                | -0.005393072 | 0.944519911 | 0.996925697 |
| g UBA7096         | g unclassified_Cordycipitaceae | 0.199421675  | 0.009338572 | 0.613926619 |
| g UBA7096         | g unidentified                 | -0.048453886 | 0.531581818 | 0.940412658 |
| g CAG-632         | g Verticillium                 | 0.013100731  | 0.865755143 | 0.994526835 |
| g CAG-632         | g unclassified_Tremellomycetes | 0.009003679  | 0.907508716 | 0.996251765 |
| g CAG-632         | g Candida                      | -0.169466975 | 0.027617507 | 0.773194645 |
| g CAG-632         | g Cladosporium                 | 0.047824503  | 0.536932831 | 0.941323418 |
| g CAG-632         | g Debaryomyces                 | -0.172640696 | 0.024796845 | 0.765986149 |
| g CAG-632         | g Aspergillus                  | -0.028918263 | 0.708980708 | 0.968657831 |
| g CAG-632         | g Kazachstania                 | 0.110919073  | 0.151093386 | 0.84984956  |
| g CAG-632         | g Malassezia                   | 0.044502716  | 0.565611697 | 0.942564508 |
| g CAG-632         | g unclassified_Fungi           | -0.016248958 | 0.833915444 | 0.994526835 |
| g CAG-632         | g Fusarium                     | -0.094264833 | 0.222819753 | 0.874689648 |
| g CAG-632         | g Mycosphaerella               | 0.02089659   | 0.787414937 | 0.986710331 |
| g CAG-632         | g Simplicillium                | 0.045546882  | 0.556518688 | 0.942564508 |
| g CAG-632         | g unclassified_Cordycipitaceae | 0.036918266  | 0.633691145 | 0.954116909 |
| g CAG-632         | g unidentified                 | 0.058658637  | 0.448717216 | 0.922032734 |
| g MGYG-HGUT-00378 | g Verticillium                 | 0.039064802  | 0.614074536 | 0.951172976 |
| g MGYG-HGUT-00378 | g unclassified_Tremellomycetes | -0.114933086 | 0.136757102 | 0.849249996 |
| g MGYG-HGUT-00378 | g Candida                      | -0.144228285 | 0.061366435 | 0.832568254 |
| g MGYG-HGUT-00378 | g Cladosporium                 | -0.019897964 | 0.797349272 | 0.987463135 |
| g MGYG-HGUT-00378 | g Debaryomyces                 | 0.010997531  | 0.887150213 | 0.994526835 |
| g MGYG-HGUT-00378 | g Aspergillus                  | 0.00351345   | 0.963839489 | 0.998529304 |
| g MGYG-HGUT-00378 | g Kazachstania                 | -0.084139386 | 0.276761177 | 0.888447676 |
| g MGYG-HGUT-00378 | g Malassezia                   | 0.130174748  | 0.091623039 | 0.8415005   |
| g MGYG-HGUT-00378 | g unclassified_Fungi           | 8.20E-05     | 0.999155436 | 0.999603646 |
| g MGYG-HGUT-00378 | g Fusarium                     | -0.038723644 | 0.617174534 | 0.952309753 |
| g MGYG-HGUT-00378 | g Mycosphaerella               | -0.1286604   | 0.095492962 | 0.8415005   |
| g MGYG-HGUT-00378 | g Simplicillium                | 0.130496465  | 0.090817199 | 0.8415005   |
| g MGYG-HGUT-00378 | g unclassified_Cordycipitaceae | 0.071035252  | 0.358742102 | 0.900151743 |

|                   |                                |              |             |             |
|-------------------|--------------------------------|--------------|-------------|-------------|
| g MGYG-HGUT-00378 | g unidentified                 | 0.056054642  | 0.469144655 | 0.928769554 |
| g MGYG-HGUT-03970 | g Verticillium                 | 0.114695194  | 0.137576652 | 0.849249996 |
| g MGYG-HGUT-03970 | g unclassified Tremellomycetes | -0.049445153 | 0.52320875  | 0.939740222 |
| g MGYG-HGUT-03970 | g Candida                      | -0.079461993 | 0.304437369 | 0.897967316 |
| g MGYG-HGUT-03970 | g Cladosporium                 | -0.004364846 | 0.955085188 | 0.99717368  |
| g MGYG-HGUT-03970 | g Debaromyces                  | -0.063231477 | 0.414084936 | 0.915150306 |
| g MGYG-HGUT-03970 | g Aspergillus                  | 0.007647308  | 0.921393455 | 0.996251765 |
| g MGYG-HGUT-03970 | g Kazachstania                 | 0.056415849  | 0.466281016 | 0.927602832 |
| g MGYG-HGUT-03970 | g Malassezia                   | 0.087153098  | 0.259857975 | 0.878368327 |
| g MGYG-HGUT-03970 | g unclassified Fungi           | 0.019730135  | 0.799022078 | 0.987463135 |
| g MGYG-HGUT-03970 | g Fusarium                     | -0.02805582  | 0.71728474  | 0.97067915  |
| g MGYG-HGUT-03970 | g Mycosphaerella               | -0.084252603 | 0.276113047 | 0.888419029 |
| g MGYG-HGUT-03970 | g Simplicillium                | 0.03004247   | 0.698207657 | 0.967320417 |
| g MGYG-HGUT-03970 | g unclassified Cordycipitaceae | 0.071910519  | 0.352836152 | 0.900151743 |
| g MGYG-HGUT-03970 | g unidentified                 | 0.078352517  | 0.311260483 | 0.897967316 |
| g Marvinbryantia  | g Verticillium                 | -0.006216333 | 0.936067587 | 0.996251765 |
| g Marvinbryantia  | g unclassified Tremellomycetes | 0.027342361  | 0.72417944  | 0.972631421 |
| g Marvinbryantia  | g Candida                      | -0.092536851 | 0.231454612 | 0.874689648 |
| g Marvinbryantia  | g Cladosporium                 | 0.002595823  | 0.97327961  | 0.998625698 |
| g Marvinbryantia  | g Debaromyces                  | -0.223160252 | 0.003540709 | 0.580842757 |
| g Marvinbryantia  | g Aspergillus                  | 0.048166473  | 0.534022079 | 0.940891392 |
| g Marvinbryantia  | g Kazachstania                 | 0.071161803  | 0.3578844   | 0.900151743 |
| g Marvinbryantia  | g Malassezia                   | 0.049399656  | 0.52359158  | 0.939740222 |
| g Marvinbryantia  | g unclassified Fungi           | 0.002493408  | 0.974333459 | 0.998625698 |
| g Marvinbryantia  | g Fusarium                     | -0.02409295  | 0.75585464  | 0.981293944 |
| g Marvinbryantia  | g Mycosphaerella               | -0.104290766 | 0.177208381 | 0.872371283 |
| g Marvinbryantia  | g Simplicillium                | 0.035478735  | 0.646992173 | 0.955501166 |
| g Marvinbryantia  | g unclassified Cordycipitaceae | 0.001554118  | 0.984000611 | 0.999015821 |
| g Marvinbryantia  | g unidentified                 | 0.083387347  | 0.281092434 | 0.8902203   |
| g MGYG-HGUT-04169 | g Verticillium                 | 0.060689893  | 0.433136363 | 0.918239588 |
| g MGYG-HGUT-04169 | g unclassified Tremellomycetes | 0.05627358   | 0.467407773 | 0.928418018 |
| g MGYG-HGUT-04169 | g Candida                      | -0.102631847 | 0.184237273 | 0.873641816 |
| g MGYG-HGUT-04169 | g Cladosporium                 | -0.059333923 | 0.443502729 | 0.920944447 |
| g MGYG-HGUT-04169 | g Debaromyces                  | -0.140210309 | 0.069033822 | 0.836518447 |
| g MGYG-HGUT-04169 | g Aspergillus                  | -0.067811332 | 0.381022646 | 0.90490297  |
| g MGYG-HGUT-04169 | g Kazachstania                 | -0.118115361 | 0.126149806 | 0.849249996 |
| g MGYG-HGUT-04169 | g Malassezia                   | -0.018176428 | 0.814550859 | 0.991258955 |
| g MGYG-HGUT-04169 | g unclassified Fungi           | -0.208198926 | 0.006601001 | 0.613922619 |
| g MGYG-HGUT-04169 | g Fusarium                     | -0.09870726  | 0.201675959 | 0.874689648 |
| g MGYG-HGUT-04169 | g Mycosphaerella               | -0.026224509 | 0.735026639 | 0.974752878 |
| g MGYG-HGUT-04169 | g Simplicillium                | -0.02431208  | 0.753705053 | 0.980575998 |
| g MGYG-HGUT-04169 | g unclassified Cordycipitaceae | 0.109231649  | 0.157448168 | 0.855241398 |
| g MGYG-HGUT-04169 | g unidentified                 | -0.05268927  | 0.49628306  | 0.935002555 |
| g UBA7160         | g Verticillium                 | 0.02104048   | 0.785986304 | 0.986710331 |
| g UBA7160         | g unclassified Tremellomycetes | -0.02284277  | 0.768153881 | 0.983620779 |
| g UBA7160         | g Candida                      | -0.071134445 | 0.358069707 | 0.900151743 |
| g UBA7160         | g Cladosporium                 | 0.006807846  | 0.929998936 | 0.996251765 |
| g UBA7160         | g Debaromyces                  | -0.079643818 | 0.303328627 | 0.897245885 |
| g UBA7160         | g Aspergillus                  | 0.023998893  | 0.756777891 | 0.981293944 |
| g UBA7160         | g Kazachstania                 | -0.011836434 | 0.878605699 | 0.994526835 |
| g UBA7160         | g Malassezia                   | 0.024471693  | 0.752140484 | 0.980278684 |
| g UBA7160         | g unclassified Fungi           | -0.07350331  | 0.342246068 | 0.900151743 |
| g UBA7160         | g Fusarium                     | -0.115108645 | 0.136154689 | 0.849249996 |
| g UBA7160         | g Mycosphaerella               | -0.095495823 | 0.216809415 | 0.874689648 |
| g UBA7160         | g Simplicillium                | -0.008821734 | 0.909369695 | 0.996251765 |
| g UBA7160         | g unclassified Cordycipitaceae | 0.036178286  | 0.640514138 | 0.955341199 |
| g UBA7160         | g unidentified                 | 0.056555229  | 0.465178596 | 0.927602832 |
| g CAG-882         | g Verticillium                 | 0.026971635  | 0.727770861 | 0.972962464 |
| g CAG-882         | g unclassified Tremellomycetes | -0.009656332 | 0.900837421 | 0.995280411 |
| g CAG-882         | g Candida                      | -0.142464051 | 0.064642356 | 0.836350979 |
| g CAG-882         | g Cladosporium                 | 0.05344732   | 0.490098645 | 0.932872225 |
| g CAG-882         | g Debaromyces                  | -0.115404035 | 0.135145674 | 0.849249996 |
| g CAG-882         | g Aspergillus                  | -0.07850944  | 0.310289412 | 0.897967316 |
| g CAG-882         | g Kazachstania                 | 0.056967331  | 0.461927497 | 0.927602832 |
| g CAG-882         | g Malassezia                   | 0.046468896  | 0.548548608 | 0.942564508 |
| g CAG-882         | g unclassified Fungi           | -0.040836738 | 0.598084194 | 0.948266952 |
| g CAG-882         | g Fusarium                     | -0.091614281 | 0.236160007 | 0.874689648 |
| g CAG-882         | g Mycosphaerella               | -0.1588312   | 0.039151302 | 0.808354944 |
| g CAG-882         | g Simplicillium                | 0.02875126   | 0.710586053 | 0.968802592 |
| g CAG-882         | g unclassified Cordycipitaceae | -0.004568861 | 0.952988205 | 0.99717368  |
| g CAG-882         | g unidentified                 | 0.008804248  | 0.909548568 | 0.996251765 |
| g Butyrivibrio A  | g Verticillium                 | 0.029540555  | 0.703010115 | 0.967508066 |
| g Butyrivibrio A  | g unclassified Tremellomycetes | -0.055879008 | 0.470540549 | 0.928769554 |
| g Butyrivibrio A  | g Candida                      | -0.145283253 | 0.059473469 | 0.832568254 |
| g Butyrivibrio A  | g Cladosporium                 | 0.065723873  | 0.395888217 | 0.909025558 |
| g Butyrivibrio A  | g Debaromyces                  | -0.229839135 | 0.002646369 | 0.550026842 |
| g Butyrivibrio A  | g Aspergillus                  | -0.107712903 | 0.163337473 | 0.860247571 |
| g Butyrivibrio A  | g Kazachstania                 | 0.072613634  | 0.348136232 | 0.900151743 |

|                       |                                |              |             |              |
|-----------------------|--------------------------------|--------------|-------------|--------------|
| g Butyrivibrio A      | g Malassezia                   | 0.11101388   | 0.150742177 | 0.84984956   |
| g Butyrivibrio A      | g unclassified Fungi           | -0.006532415 | 0.932824246 | 0.996251765  |
| g Butyrivibrio A      | g Fusarium                     | -0.138781156 | 0.071942288 | 0.8415005    |
| g Butyrivibrio A      | g Mycosphaerella               | -0.06197143  | 0.423467997 | 0.918013177  |
| g Butyrivibrio A      | g Simplicillium                | 0.110117551  | 0.154087314 | 0.85006873   |
| g Butyrivibrio A      | g unclassified Cordycipitaceae | 0.044232529  | 0.567976056 | 0.942564508  |
| g Butyrivibrio A      | g unidentified                 | 0.124590676  | 0.106537635 | 0.842981324  |
| g CAG-590             | g Verticillium                 | 0.036008224  | 0.642086488 | 0.955341199  |
| g CAG-590             | g unclassified Tremellomycetes | -0.013807602 | 0.858585445 | 0.994526835  |
| g CAG-590             | g Candida                      | -0.106951693 | 0.16635046  | 0.864987015  |
| g CAG-590             | g Cladosporium                 | 0.099488048  | 0.198114835 | 0.874689648  |
| g CAG-590             | g Debaromyces                  | -0.141680796 | 0.066141897 | 0.836350979  |
| g CAG-590             | g Aspergillus                  | 0.039991134  | 0.60569177  | 0.950933357  |
| g CAG-590             | g Kazachstania                 | 0.088166823  | 0.254334867 | 0.874689648  |
| g CAG-590             | g Malassezia                   | 0.037978851  | 0.623965717 | 0.952309753  |
| g CAG-590             | g unclassified Fungi           | -0.045556066 | 0.556439024 | 0.942564508  |
| g CAG-590             | g Fusarium                     | -0.10011885  | 0.195271245 | 0.874689648  |
| g CAG-590             | g Mycosphaerella               | 0.000332485  | 0.99657691  | 0.999334917  |
| g CAG-590             | g Simplicillium                | 0.03913604   | 0.613428075 | 0.951172976  |
| g CAG-590             | g unclassified Cordycipitaceae | -0.018912876 | 0.807180905 | 0.989255135  |
| g CAG-590             | g unidentified                 | -0.003762882 | 0.961274267 | 0.998221928  |
| g UBA11774            | g Verticillium                 | 0.099683635  | 0.197229957 | 0.874689648  |
| g UBA11774            | g unclassified Tremellomycetes | -0.044020355 | 0.569836035 | 0.942564508  |
| g UBA11774            | g Candida                      | -0.03669118  | 0.635781748 | 0.954338328  |
| g UBA11774            | g Cladosporium                 | 0.006760458  | 0.930484971 | 0.996251765  |
| g UBA11774            | g Debaromyces                  | -0.024894605 | 0.747999903 | 0.9791214732 |
| g UBA11774            | g Aspergillus                  | 0.055830027  | 0.470930247 | 0.928769554  |
| g UBA11774            | g Kazachstania                 | 0.028867412  | 0.709469388 | 0.968724426  |
| g UBA11774            | g Malassezia                   | 0.046341396  | 0.549647404 | 0.942564508  |
| g UBA11774            | g unclassified Fungi           | 0.099707076  | 0.1971241   | 0.874689648  |
| g UBA11774            | g Fusarium                     | 0.020610133  | 0.790261185 | 0.986710331  |
| g UBA11774            | g Mycosphaerella               | 0.034182198  | 0.659068536 | 0.956966684  |
| g UBA11774            | g Simplicillium                | 0.089536447  | 0.247002053 | 0.874689648  |
| g UBA11774            | g unclassified Cordycipitaceae | 0.037532642  | 0.628049612 | 0.953023967  |
| g UBA11774            | g unidentified                 | 0.129175807  | 0.094161534 | 0.8415005    |
| g NK4A136             | g Verticillium                 | 0.019293666  | 0.80337677  | 0.988396129  |
| g NK4A136             | g unclassified Tremellomycetes | 0.103701054  | 0.179683973 | 0.872371283  |
| g NK4A136             | g Candida                      | -0.200205849 | 0.009058527 | 0.613926619  |
| g NK4A136             | g Cladosporium                 | 0.082023761  | 0.289061534 | 0.891214772  |
| g NK4A136             | g Debaromyces                  | -0.130952364 | 0.089684947 | 0.8415005    |
| g NK4A136             | g Aspergillus                  | -0.061516243 | 0.426887668 | 0.918239588  |
| g NK4A136             | g Kazachstania                 | 0.11485595   | 0.137022429 | 0.849249996  |
| g NK4A136             | g Malassezia                   | -0.025355965 | 0.743491089 | 0.978404143  |
| g NK4A136             | g unclassified Fungi           | -0.102126468 | 0.186418694 | 0.873641816  |
| g NK4A136             | g Fusarium                     | -0.037865382 | 0.625003155 | 0.952422937  |
| g NK4A136             | g Mycosphaerella               | 0.011330345  | 0.883758778 | 0.994526835  |
| g NK4A136             | g Simplicillium                | 0.045461091  | 0.557263122 | 0.942564508  |
| g NK4A136             | g unclassified Cordycipitaceae | 0.029327005  | 0.705057001 | 0.967508066  |
| g NK4A136             | g unidentified                 | 0.028281181  | 0.715111598 | 0.970380158  |
| g Bacteroides F       | g Verticillium                 | -0.011632633 | 0.880680227 | 0.994526835  |
| g Bacteroides F       | g unclassified Tremellomycetes | 0.092928045  | 0.229479459 | 0.874689648  |
| g Bacteroides F       | g Candida                      | -0.093571328 | 0.226257394 | 0.874689648  |
| g Bacteroides F       | g Cladosporium                 | 0.098609545  | 0.20212487  | 0.874689648  |
| g Bacteroides F       | g Debaromyces                  | -0.199469109 | 0.009321417 | 0.613926619  |
| g Bacteroides F       | g Aspergillus                  | -0.06097935  | 0.430941601 | 0.918239588  |
| g Bacteroides F       | g Kazachstania                 | 0.157270578  | 0.041144647 | 0.808354944  |
| g Bacteroides F       | g Malassezia                   | 0.057590754  | 0.457033261 | 0.924332119  |
| g Bacteroides F       | g unclassified Fungi           | -0.029757441 | 0.700933431 | 0.967505184  |
| g Bacteroides F       | g Fusarium                     | -0.074909895 | 0.333063379 | 0.900151743  |
| g Bacteroides F       | g Mycosphaerella               | 0.019203194  | 0.804280184 | 0.988720167  |
| g Bacteroides F       | g Simplicillium                | 0.07597762   | 0.32619913  | 0.899370541  |
| g Bacteroides F       | g unclassified Cordycipitaceae | 0.011179301  | 0.885297683 | 0.994526835  |
| g Bacteroides F       | g unidentified                 | 0.008130625  | 0.916442944 | 0.996251765  |
| g Lachnoclostridium A | g Verticillium                 | 0.094116723  | 0.22355079  | 0.874689648  |
| g Lachnoclostridium A | g unclassified Tremellomycetes | 0.099849743  | 0.196480702 | 0.874689648  |
| g Lachnoclostridium A | g Candida                      | -0.008960395 | 0.907951392 | 0.996251765  |
| g Lachnoclostridium A | g Cladosporium                 | 0.012337006  | 0.873513801 | 0.994526835  |
| g Lachnoclostridium A | g Debaromyces                  | -0.100010912 | 0.195755703 | 0.874689648  |
| g Lachnoclostridium A | g Aspergillus                  | -0.020926672 | 0.787116205 | 0.986710331  |
| g Lachnoclostridium A | g Kazachstania                 | -0.024300709 | 0.753816549 | 0.980575998  |
| g Lachnoclostridium A | g Malassezia                   | 0.047801981  | 0.537124815 | 0.941323418  |
| g Lachnoclostridium A | g unclassified Fungi           | -0.15845127  | 0.039628937 | 0.808354944  |
| g Lachnoclostridium A | g Fusarium                     | -0.081528269 | 0.29199431  | 0.892181547  |
| g Lachnoclostridium A | g Mycosphaerella               | 0.028259412  | 0.715321424 | 0.970380158  |
| g Lachnoclostridium A | g Simplicillium                | 0.005267047  | 0.945814375 | 0.996925697  |
| g Lachnoclostridium A | g unclassified Cordycipitaceae | 0.161672013  | 0.035731236 | 0.808354944  |
| g Lachnoclostridium A | g unidentified                 | -0.063288497 | 0.413663233 | 0.915150306  |
| g CAG-603             | g Verticillium                 | 0.012446277  | 0.872402961 | 0.994526835  |



|                   |                                |              |             |              |
|-------------------|--------------------------------|--------------|-------------|--------------|
| g CAG-603         | g unclassified Tremellomycetes | 0.01147597   | 0.882275488 | 0.994526835  |
| g CAG-603         | g Candida                      | -0.096245533 | 0.21320607  | 0.874689648  |
| g CAG-603         | g Cladosporium                 | 0.023371298  | 0.762946976 | 0.982076388  |
| g CAG-603         | g Debaryomyces                 | -0.184869225 | 0.016117599 | 0.702895198  |
| g CAG-603         | g Aspergillus                  | -0.035803617 | 0.643980343 | 0.955501166  |
| g CAG-603         | g Kazachstania                 | 0.107912363  | 0.162554766 | 0.859887758  |
| g CAG-603         | g Malassezia                   | -0.013411433 | 0.862602346 | 0.994526835  |
| g CAG-603         | g unclassified Fungi           | 0.024511508  | 0.751750372 | 0.980278684  |
| g CAG-603         | g Fusarium                     | -0.143381196 | 0.06292194  | 0.832568254  |
| g CAG-603         | g Mycosphaerella               | -0.033859947 | 0.662083953 | 0.959259869  |
| g CAG-603         | g Simplicillium                | 0.117721859  | 0.127425953 | 0.849249996  |
| g CAG-603         | g unclassified Cordycipitaceae | -0.06096639  | 0.431039732 | 0.918239588  |
| g CAG-603         | g unidentified                 | 0.108301571  | 0.161035539 | 0.859887758  |
| g Lachnobacterium | g Verticillium                 | 0.020490935  | 0.791446363 | 0.986710331  |
| g Lachnobacterium | g unclassified Tremellomycetes | 0.015817254  | 0.838266773 | 0.994526835  |
| g Lachnobacterium | g Candida                      | -0.069079653 | 0.372158655 | 0.901117392  |
| g Lachnobacterium | g Cladosporium                 | 0.062063283  | 0.422779863 | 0.917780474  |
| g Lachnobacterium | g Debaryomyces                 | -0.108093398 | 0.161846788 | 0.859887758  |
| g Lachnobacterium | g Aspergillus                  | -0.01590978  | 0.837333743 | 0.994526835  |
| g Lachnobacterium | g Kazachstania                 | 0.082649337  | 0.285386992 | 0.891214772  |
| g Lachnobacterium | g Malassezia                   | 0.018677299  | 0.809536661 | 0.989767396  |
| g Lachnobacterium | g unclassified Fungi           | 0.007072887  | 0.927281024 | 0.996251765  |
| g Lachnobacterium | g Fusarium                     | -0.134186988 | 0.081971578 | 0.8415005    |
| g Lachnobacterium | g Mycosphaerella               | -0.024733534 | 0.749576049 | 0.980027605  |
| g Lachnobacterium | g Simplicillium                | 0.125304146  | 0.104532001 | 0.841929371  |
| g Lachnobacterium | g unclassified Cordycipitaceae | 0.02441741   | 0.752672469 | 0.980305754  |
| g Lachnobacterium | g unidentified                 | 0.020154407  | 0.794795    | 0.987047876  |
| g UBA2882         | g Verticillium                 | -0.041720868 | 0.590176326 | 0.947252808  |
| g UBA2882         | g unclassified Tremellomycetes | 0.108777162  | 0.159193583 | 0.85940316   |
| g UBA2882         | g Candida                      | -0.078946903 | 0.307592763 | 0.897967316  |
| g UBA2882         | g Cladosporium                 | 0.050816739  | 0.511734834 | 0.938061907  |
| g UBA2882         | g Debaryomyces                 | -0.097735416 | 0.2061728   | 0.874689648  |
| g UBA2882         | g Aspergillus                  | -0.011778424 | 0.879196113 | 0.994526835  |
| g UBA2882         | g Kazachstania                 | 0.090971106  | 0.23947981  | 0.874689648  |
| g UBA2882         | g Malassezia                   | 0.062599497  | 0.418775712 | 0.916661525  |
| g UBA2882         | g unclassified Fungi           | -0.104098123 | 0.178014308 | 0.8723271283 |
| g UBA2882         | g Fusarium                     | -0.083098066 | 0.282770578 | 0.8902203    |
| g UBA2882         | g Mycosphaerella               | -0.027726048 | 0.720468775 | 0.97164814   |
| g UBA2882         | g Simplicillium                | 0.074321124  | 0.336887735 | 0.900151743  |
| g UBA2882         | g unclassified Cordycipitaceae | 0.031463291  | 0.684678166 | 0.963892039  |
| g UBA2882         | g unidentified                 | -0.080486206 | 0.298226623 | 0.892181547  |
| g MGYG-HGUT-02276 | g Verticillium                 | 0.067385238  | 0.384029101 | 0.906174944  |
| g MGYG-HGUT-02276 | g unclassified Tremellomycetes | 0.054163086  | 0.484297123 | 0.932872225  |
| g MGYG-HGUT-02276 | g Candida                      | -0.032489492 | 0.674968059 | 0.961738272  |
| g MGYG-HGUT-02276 | g Cladosporium                 | -0.001949755 | 0.979928364 | 0.998625698  |
| g MGYG-HGUT-02276 | g Debaryomyces                 | -0.043860553 | 0.571238796 | 0.942564508  |
| g MGYG-HGUT-02276 | g Aspergillus                  | 0.01217055   | 0.875206454 | 0.994526835  |
| g MGYG-HGUT-02276 | g Kazachstania                 | -0.148085014 | 0.054678177 | 0.832568254  |
| g MGYG-HGUT-02276 | g Malassezia                   | 0.029897279  | 0.699595658 | 0.967503184  |
| g MGYG-HGUT-02276 | g unclassified Fungi           | -0.207352903 | 0.006829499 | 0.613926619  |
| g MGYG-HGUT-02276 | g Fusarium                     | -0.089440005 | 0.247513539 | 0.874689648  |
| g MGYG-HGUT-02276 | g Mycosphaerella               | -0.079540124 | 0.303960611 | 0.897852684  |
| g MGYG-HGUT-02276 | g Simplicillium                | 0.110627044  | 0.152179074 | 0.84984956   |
| g MGYG-HGUT-02276 | g unclassified Cordycipitaceae | 0.081128052  | 0.294377568 | 0.892181547  |
| g MGYG-HGUT-02276 | g unidentified                 | -0.022118402 | 0.775306983 | 0.984510076  |
| g MGYG-HGUT-03273 | g Verticillium                 | -0.023480857 | 0.761868957 | 0.982076388  |
| g MGYG-HGUT-03273 | g unclassified Tremellomycetes | -0.047499495 | 0.539706523 | 0.94160936   |
| g MGYG-HGUT-03273 | g Candida                      | -0.051035458 | 0.509917258 | 0.937011504  |
| g MGYG-HGUT-03273 | g Cladosporium                 | -0.097492218 | 0.207309315 | 0.874689648  |
| g MGYG-HGUT-03273 | g Debaryomyces                 | -0.110167682 | 0.153898759 | 0.85006873   |
| g MGYG-HGUT-03273 | g Aspergillus                  | 0.032432243  | 0.675508371 | 0.962210936  |
| g MGYG-HGUT-03273 | g Kazachstania                 | 0.099006647  | 0.200305048 | 0.874689648  |
| g MGYG-HGUT-03273 | g Malassezia                   | 0.020277797  | 0.793566764 | 0.986710331  |
| g MGYG-HGUT-03273 | g unclassified Fungi           | 0.105813343  | 0.170933213 | 0.867877301  |
| g MGYG-HGUT-03273 | g Fusarium                     | -0.074967377 | 0.332691497 | 0.900151743  |
| g MGYG-HGUT-03273 | g Mycosphaerella               | 0.038139673  | 0.622496591 | 0.952309753  |
| g MGYG-HGUT-03273 | g Simplicillium                | 0.090948987  | 0.239594556 | 0.874689648  |
| g MGYG-HGUT-03273 | g unclassified Cordycipitaceae | -0.055527167 | 0.473343723 | 0.928769554  |
| g MGYG-HGUT-03273 | g unidentified                 | 0.113588995  | 0.141436936 | 0.849249996  |
| g UBA2856         | g Verticillium                 | 0.101125263  | 0.19079604  | 0.874689648  |
| g UBA2856         | g unclassified Tremellomycetes | -0.077573137 | 0.316112867 | 0.898525398  |
| g UBA2856         | g Candida                      | -0.069467057 | 0.369476644 | 0.901117392  |
| g UBA2856         | g Cladosporium                 | -0.11252052  | 0.145243355 | 0.849249996  |
| g UBA2856         | g Debaryomyces                 | -0.004341769 | 0.955322402 | 0.99717368   |
| g UBA2856         | g Aspergillus                  | 0.023299947  | 0.763649294 | 0.982078114  |
| g UBA2856         | g Kazachstania                 | 0.071030558  | 0.358773944 | 0.900151743  |
| g UBA2856         | g Malassezia                   | 0.068581182  | 0.375627131 | 0.903077197  |
| g UBA2856         | g unclassified Fungi           | 0.077890927  | 0.314128411 | 0.898525398  |

|                   |                                |              |             |             |
|-------------------|--------------------------------|--------------|-------------|-------------|
| g UBA2856         | g Fusarium                     | 0.073466076  | 0.342491304 | 0.900151743 |
| g UBA2856         | g Mycosphaerella               | 0.011983336  | 0.877110864 | 0.994526835 |
| g UBA2856         | g Simplicillium                | -0.074213156 | 0.337592066 | 0.900151743 |
| g UBA2856         | g unclassified Cordycipitaceae | 0.005828493  | 0.940048669 | 0.996925697 |
| g UBA2856         | g unidentified                 | 0.12967396   | 0.092888736 | 0.8415005   |
| g Acetivibrio A   | g Verticillium                 | 0.07512218   | 0.331691319 | 0.900151743 |
| g Acetivibrio A   | g unclassified Tremellomycetes | 0.010180713  | 0.895482299 | 0.995135868 |
| g Acetivibrio A   | g Candida                      | -0.169560572 | 0.027530556 | 0.773194645 |
| g Acetivibrio A   | g Cladosporium                 | 0.095564329  | 0.21647836  | 0.874689648 |
| g Acetivibrio A   | g Debaromyces                  | -0.189952764 | 0.013375083 | 0.69108662  |
| g Acetivibrio A   | g Aspergillus                  | -0.029111174 | 0.707127903 | 0.96831002  |
| g Acetivibrio A   | g Kazachstania                 | 0.089932927  | 0.244907011 | 0.874689648 |
| g Acetivibrio A   | g Malassezia                   | 0.088718708  | 0.251362282 | 0.874689648 |
| g Acetivibrio A   | g unclassified Fungi           | -0.059315921 | 0.443641289 | 0.921010267 |
| g Acetivibrio A   | g Fusarium                     | -0.053260172 | 0.491621629 | 0.933231913 |
| g Acetivibrio A   | g Mycosphaerella               | -0.027006819 | 0.727429761 | 0.972788372 |
| g Acetivibrio A   | g Simplicillium                | 0.122215006  | 0.1134344   | 0.843328451 |
| g Acetivibrio A   | g unclassified Cordycipitaceae | 0.11201496   | 0.147071277 | 0.849249996 |
| g Acetivibrio A   | g unidentified                 | 0.039802176  | 0.607397601 | 0.950933357 |
| g MGYG-HGUT-03215 | g Verticillium                 | 0.059600538  | 0.441453434 | 0.920232298 |
| g MGYG-HGUT-03215 | g unclassified Tremellomycetes | 0.052925691  | 0.494349851 | 0.93383942  |
| g MGYG-HGUT-03215 | g Candida                      | -0.076319728 | 0.324019182 | 0.899370541 |
| g MGYG-HGUT-03215 | g Cladosporium                 | 0.091526517  | 0.236611097 | 0.874689648 |
| g MGYG-HGUT-03215 | g Debaromyces                  | -0.081625008 | 0.291420167 | 0.892181547 |
| g MGYG-HGUT-03215 | g Aspergillus                  | 0.03220711   | 0.67763475  | 0.962963695 |
| g MGYG-HGUT-03215 | g Kazachstania                 | 0.082522486  | 0.286129553 | 0.891214772 |
| g MGYG-HGUT-03215 | g Malassezia                   | 0.087316846  | 0.258960297 | 0.878368327 |
| g MGYG-HGUT-03215 | g unclassified Fungi           | -0.063900308 | 0.409154357 | 0.913116876 |
| g MGYG-HGUT-03215 | g Fusarium                     | -0.076933905 | 0.320129231 | 0.898741278 |
| g MGYG-HGUT-03215 | g Mycosphaerella               | -0.05642166  | 0.466235026 | 0.927602832 |
| g MGYG-HGUT-03215 | g Simplicillium                | 0.136738434  | 0.076271312 | 0.8415005   |
| g MGYG-HGUT-03215 | g unclassified Cordycipitaceae | 0.07475606   | 0.33405992  | 0.900151743 |
| g MGYG-HGUT-03215 | g unidentified                 | -0.052977431 | 0.493927305 | 0.933806007 |
| g MGYG-HGUT-04039 | g Verticillium                 | 0.033775476  | 0.662875285 | 0.959259869 |
| g MGYG-HGUT-04039 | g unclassified Tremellomycetes | 0.101510478  | 0.189103059 | 0.873641816 |
| g MGYG-HGUT-04039 | g Candida                      | -0.135005006 | 0.080107872 | 0.8415005   |
| g MGYG-HGUT-04039 | g Cladosporium                 | 0.112718157  | 0.144533479 | 0.849249996 |
| g MGYG-HGUT-04039 | g Debaromyces                  | -0.158499282 | 0.039568309 | 0.808354944 |
| g MGYG-HGUT-04039 | g Aspergillus                  | -0.022150497 | 0.774989636 | 0.984510076 |
| g MGYG-HGUT-04039 | g Kazachstania                 | 0.120618074  | 0.118262977 | 0.849176369 |
| g MGYG-HGUT-04039 | g Malassezia                   | 0.106068439  | 0.169898194 | 0.866011457 |
| g MGYG-HGUT-04039 | g unclassified Fungi           | -0.052519464 | 0.497674027 | 0.93540393  |
| g MGYG-HGUT-04039 | g Fusarium                     | -0.025992946 | 0.737280282 | 0.976057954 |
| g MGYG-HGUT-04039 | g Mycosphaerella               | -0.083196026 | 0.28220155  | 0.8902203   |
| g MGYG-HGUT-04039 | g Simplicillium                | 0.09136774   | 0.237428718 | 0.874689648 |
| g MGYG-HGUT-04039 | g unclassified Cordycipitaceae | 0.044709241  | 0.563807598 | 0.942564508 |
| g MGYG-HGUT-04039 | g unidentified                 | -0.070492944 | 0.362432102 | 0.901117392 |
| g Sellimonas      | g Verticillium                 | 0.068810764  | 0.374027194 | 0.902163371 |
| g Sellimonas      | g unclassified Tremellomycetes | 0.104594646  | 0.175942575 | 0.871837921 |
| g Sellimonas      | g Candida                      | -0.03340209  | 0.666377636 | 0.959776195 |
| g Sellimonas      | g Cladosporium                 | 0.032276389  | 0.676980136 | 0.962963695 |
| g Sellimonas      | g Debaromyces                  | -0.065658965 | 0.396355949 | 0.909420539 |
| g Sellimonas      | g Aspergillus                  | -0.044656237 | 0.564270351 | 0.942564508 |
| g Sellimonas      | g Kazachstania                 | 0.098143131  | 0.204277545 | 0.874689648 |
| g Sellimonas      | g Malassezia                   | 0.025703163  | 0.740103699 | 0.977217936 |
| g Sellimonas      | g unclassified Fungi           | -0.127347255 | 0.098952712 | 0.8415005   |
| g Sellimonas      | g Fusarium                     | -0.136253919 | 0.077328414 | 0.8415005   |
| g Sellimonas      | g Mycosphaerella               | -0.038465646 | 0.619523379 | 0.952309753 |
| g Sellimonas      | g Simplicillium                | -0.000503668 | 0.994814515 | 0.999049974 |
| g Sellimonas      | g unclassified Cordycipitaceae | 0.099784327  | 0.196775525 | 0.874689648 |
| g Sellimonas      | g unidentified                 | -0.070508385 | 0.362326708 | 0.901117392 |
| g MGYG-HGUT-04548 | g Verticillium                 | -0.016739519 | 0.828976983 | 0.993650851 |
| g MGYG-HGUT-04548 | g unclassified Tremellomycetes | 0.096058935  | 0.214098888 | 0.874689648 |
| g MGYG-HGUT-04548 | g Candida                      | -0.102636179 | 0.184218658 | 0.873641816 |
| g MGYG-HGUT-04548 | g Cladosporium                 | 0.08621137   | 0.265062051 | 0.878368327 |
| g MGYG-HGUT-04548 | g Debaromyces                  | -0.192430078 | 0.012193455 | 0.659702633 |
| g MGYG-HGUT-04548 | g Aspergillus                  | 0.040627309  | 0.599964342 | 0.948957829 |
| g MGYG-HGUT-04548 | g Kazachstania                 | 0.051129093  | 0.509140169 | 0.937011504 |
| g MGYG-HGUT-04548 | g Malassezia                   | 0.117718418  | 0.127437155 | 0.849249996 |
| g MGYG-HGUT-04548 | g unclassified Fungi           | -0.047551337 | 0.539263616 | 0.941536464 |
| g MGYG-HGUT-04548 | g Fusarium                     | -0.052555188 | 0.497381222 | 0.935161841 |
| g MGYG-HGUT-04548 | g Mycosphaerella               | -0.039736742 | 0.607988812 | 0.951102497 |
| g MGYG-HGUT-04548 | g Simplicillium                | 0.041610955  | 0.591156812 | 0.947252808 |
| g MGYG-HGUT-04548 | g unclassified Cordycipitaceae | 0.054007556  | 0.485554598 | 0.932872225 |
| g MGYG-HGUT-04548 | g unidentified                 | 0.020321108  | 0.793135763 | 0.986710331 |
| g V9D3004         | g Verticillium                 | 0.059468526  | 0.442467451 | 0.92043404  |
| g V9D3004         | g unclassified Tremellomycetes | -0.001547104 | 0.984072814 | 0.999015821 |
| g V9D3004         | g Candida                      | -0.037850584 | 0.625138506 | 0.952422937 |

|                     |                                |              |             |             |
|---------------------|--------------------------------|--------------|-------------|-------------|
| g V9D3004           | g Cladosporium                 | 0.08705609   | 0.260390789 | 0.878368327 |
| g V9D3004           | g Debaryomyces                 | -0.087812937 | 0.256253686 | 0.87575706  |
| g V9D3004           | g Aspergillus                  | -0.005126533 | 0.947257819 | 0.996925697 |
| g V9D3004           | g Kazachstania                 | 0.158220143  | 0.039921892 | 0.808354944 |
| g V9D3004           | g Malassezia                   | -0.016245145 | 0.833953857 | 0.994526835 |
| g V9D3004           | g unclassified Fungi           | 0.071280872  | 0.357078571 | 0.900151743 |
| g V9D3004           | g Fusarium                     | -0.10570651  | 0.171368063 | 0.867877301 |
| g V9D3004           | g Mycosphaerella               | 0.054026702  | 0.485399702 | 0.932872225 |
| g V9D3004           | g Simplicillium                | 0.030543608  | 0.693424548 | 0.966086731 |
| g V9D3004           | g unclassified Cordycipitaceae | 0.036620121  | 0.63643653  | 0.954338328 |
| g V9D3004           | g unidentified                 | 0.095227207  | 0.218110974 | 0.874689648 |
| g CAG-791           | g Verticillium                 | 0.005901502  | 0.939299132 | 0.996661736 |
| g CAG-791           | g unclassified Tremellomycetes | -0.016472336 | 0.831665883 | 0.994526835 |
| g CAG-791           | g Candida                      | -0.144843437 | 0.060256728 | 0.832568254 |
| g CAG-791           | g Cladosporium                 | -0.024461945 | 0.752236013 | 0.980278684 |
| g CAG-791           | g Debaryomyces                 | -0.198453744 | 0.009694776 | 0.613926619 |
| g CAG-791           | g Aspergillus                  | 0.020837097  | 0.788005837 | 0.986710331 |
| g CAG-791           | g Kazachstania                 | -0.031543334 | 0.683918906 | 0.963892039 |
| g CAG-791           | g Malassezia                   | -0.048650632 | 0.529914599 | 0.940412658 |
| g CAG-791           | g unclassified Fungi           | -0.065497547 | 0.397520567 | 0.909588897 |
| g CAG-791           | g Fusarium                     | -0.034356105 | 0.657443499 | 0.956614192 |
| g CAG-791           | g Mycosphaerella               | -0.070767634 | 0.360560106 | 0.900151743 |
| g CAG-791           | g Simplicillium                | 0.094184419  | 0.223216448 | 0.874689648 |
| g CAG-791           | g unclassified Cordycipitaceae | 0.020640418  | 0.789960141 | 0.986710331 |
| g CAG-791           | g unidentified                 | 0.089346822  | 0.248008442 | 0.874689648 |
| g Lachnoclostridium | g Verticillium                 | 0.02087914   | 0.787588244 | 0.986710331 |
| g Lachnoclostridium | g unclassified Tremellomycetes | 0.127699388  | 0.098015359 | 0.8415005   |
| g Lachnoclostridium | g Candida                      | -0.035076758 | 0.650726659 | 0.955597379 |
| g Lachnoclostridium | g Cladosporium                 | -0.034949484 | 0.651910893 | 0.955597379 |
| g Lachnoclostridium | g Debaryomyces                 | 0.02002084   | 0.796125105 | 0.987463135 |
| g Lachnoclostridium | g Aspergillus                  | 0.025529601  | 0.741796417 | 0.977585637 |
| g Lachnoclostridium | g Kazachstania                 | 0.062486268  | 0.419619393 | 0.916661525 |
| g Lachnoclostridium | g Malassezia                   | 0.058908935  | 0.446780427 | 0.921010267 |
| g Lachnoclostridium | g unclassified Fungi           | -0.159435218 | 0.038401932 | 0.808354944 |
| g Lachnoclostridium | g Fusarium                     | 0.012768998  | 0.869123675 | 0.994526835 |
| g Lachnoclostridium | g Mycosphaerella               | -0.066086133 | 0.393283828 | 0.907694413 |
| g Lachnoclostridium | g Simplicillium                | -0.053737918 | 0.487738795 | 0.932872225 |
| g Lachnoclostridium | g unclassified Cordycipitaceae | 0.045017735  | 0.561117873 | 0.942564508 |
| g Lachnoclostridium | g unidentified                 | -0.05000507  | 0.518509044 | 0.939250598 |
| g CAG-510           | g Verticillium                 | 0.118797986  | 0.123959445 | 0.849176369 |
| g CAG-510           | g unclassified Tremellomycetes | -0.015729434 | 0.839152553 | 0.994526835 |
| g CAG-510           | g Candida                      | -0.218985368 | 0.004229942 | 0.600391491 |
| g CAG-510           | g Cladosporium                 | 0.037980539  | 0.623950286 | 0.952309753 |
| g CAG-510           | g Debaryomyces                 | -0.17213579  | 0.025228321 | 0.765986149 |
| g CAG-510           | g Aspergillus                  | 0.011733756  | 0.879650771 | 0.994526835 |
| g CAG-510           | g Kazachstania                 | 0.016985918  | 0.826499006 | 0.993650851 |
| g CAG-510           | g Malassezia                   | 0.031215517  | 0.687030488 | 0.963892039 |
| g CAG-510           | g unclassified Fungi           | -0.03113594  | 0.687786614 | 0.964084767 |
| g CAG-510           | g Fusarium                     | -0.147358157 | 0.055890418 | 0.832568254 |
| g CAG-510           | g Mycosphaerella               | -0.045724678 | 0.554977438 | 0.942564508 |
| g CAG-510           | g Simplicillium                | 0.183557809  | 0.01690004  | 0.702895198 |
| g CAG-510           | g unclassified Cordycipitaceae | 0.027341582  | 0.724186981 | 0.972631421 |
| g CAG-510           | g unidentified                 | -0.004164192 | 0.95714793  | 0.997257748 |
| g Stomatobaculum    | g Verticillium                 | -0.035317577 | 0.648488329 | 0.955501166 |
| g Stomatobaculum    | g unclassified Tremellomycetes | 0.129891294  | 0.092337745 | 0.8415005   |
| g Stomatobaculum    | g Candida                      | -0.110417773 | 0.152960701 | 0.85006873  |
| g Stomatobaculum    | g Cladosporium                 | 0.002979461  | 0.969332393 | 0.998625698 |
| g Stomatobaculum    | g Debaryomyces                 | -0.15169634  | 0.048973131 | 0.832568254 |
| g Stomatobaculum    | g Aspergillus                  | -0.021534572 | 0.781086091 | 0.986171666 |
| g Stomatobaculum    | g Kazachstania                 | 0.153781696  | 0.045910509 | 0.825673201 |
| g Stomatobaculum    | g Malassezia                   | -0.005155035 | 0.946965007 | 0.996925697 |
| g Stomatobaculum    | g unclassified Fungi           | 0.023853787  | 0.758202896 | 0.981641864 |
| g Stomatobaculum    | g Fusarium                     | -0.11849165  | 0.12493873  | 0.849176369 |
| g Stomatobaculum    | g Mycosphaerella               | 0.002830304  | 0.970866974 | 0.998625698 |
| g Stomatobaculum    | g Simplicillium                | 0.076487347  | 0.322954539 | 0.899359666 |
| g Stomatobaculum    | g unclassified Cordycipitaceae | 0.023219277  | 0.764443564 | 0.982298393 |
| g Stomatobaculum    | g unidentified                 | 0.018250028  | 0.813813563 | 0.991049439 |
| g Murimonas         | g Verticillium                 | 0.031700039  | 0.682433358 | 0.963892039 |
| g Murimonas         | g unclassified Tremellomycetes | -0.008929385 | 0.908268549 | 0.996251765 |
| g Murimonas         | g Candida                      | -0.083600874 | 0.279858047 | 0.889387397 |
| g Murimonas         | g Cladosporium                 | -0.006575402 | 0.932383246 | 0.996251765 |
| g Murimonas         | g Debaryomyces                 | -0.162689261 | 0.034569605 | 0.808354944 |
| g Murimonas         | g Aspergillus                  | -0.057204544 | 0.460061828 | 0.92742804  |
| g Murimonas         | g Kazachstania                 | 0.138804244  | 0.071894523 | 0.8415005   |
| g Murimonas         | g Malassezia                   | 0.035714602  | 0.644804986 | 0.955501166 |
| g Murimonas         | g unclassified Fungi           | -0.085466521 | 0.269228225 | 0.880885289 |
| g Murimonas         | g Fusarium                     | -0.143608819 | 0.062500817 | 0.832568254 |
| g Murimonas         | g Mycosphaerella               | -0.117883495 | 0.126900558 | 0.849249996 |

|                   |                                |              |             |             |
|-------------------|--------------------------------|--------------|-------------|-------------|
| g Murimonas       | g Simplicillium                | 0.049787824  | 0.520329944 | 0.939569324 |
| g Murimonas       | g unclassified Cordycipitaceae | -0.012948884 | 0.86729675  | 0.994526835 |
| g Murimonas       | g unidentified                 | -0.094836194 | 0.220015533 | 0.874689648 |
| g Robinsoniella   | g Verticillium                 | 0.041249706  | 0.594384569 | 0.947273049 |
| g Robinsoniella   | g unclassified Tremellomycetes | 0.203629388  | 0.007921057 | 0.613926619 |
| g Robinsoniella   | g Candida                      | -0.071709683 | 0.354185894 | 0.900151743 |
| g Robinsoniella   | g Cladosporium                 | 0.022824383  | 0.768335216 | 0.983716446 |
| g Robinsoniella   | g Debaromyces                  | 0.059450065  | 0.442609361 | 0.92043404  |
| g Robinsoniella   | g Aspergillus                  | 0.033463726  | 0.665798993 | 0.959776195 |
| g Robinsoniella   | g Kazachstania                 | 0.114923168  | 0.136791193 | 0.849249996 |
| g Robinsoniella   | g Malassezia                   | 0.171873812  | 0.025454724 | 0.765986149 |
| g Robinsoniella   | g unclassified Fungi           | -0.181049818 | 0.018488775 | 0.702895198 |
| g Robinsoniella   | g Fusarium                     | -0.015550981 | 0.840953114 | 0.994526835 |
| g Robinsoniella   | g Mycosphaerella               | -0.096496915 | 0.212007492 | 0.874689648 |
| g Robinsoniella   | g Simplicillium                | 0.066134636  | 0.392935903 | 0.907694413 |
| g Robinsoniella   | g unclassified Cordycipitaceae | 0.104437771  | 0.1765952   | 0.872198778 |
| g Robinsoniella   | g unidentified                 | -0.102168818 | 0.18623517  | 0.873641816 |
| g MGYG-HGUT-03578 | g Verticillium                 | -0.059204222 | 0.444501597 | 0.921010267 |
| g MGYG-HGUT-03578 | g unclassified Tremellomycetes | -0.053996641 | 0.485642914 | 0.932872225 |
| g MGYG-HGUT-03578 | g Candida                      | -0.100225043 | 0.194795471 | 0.874689648 |
| g MGYG-HGUT-03578 | g Cladosporium                 | -0.077545432 | 0.316286259 | 0.898525398 |
| g MGYG-HGUT-03578 | g Debaromyces                  | -0.171077707 | 0.026153447 | 0.765986149 |
| g MGYG-HGUT-03578 | g Aspergillus                  | 0.104075909  | 0.178107413 | 0.872371283 |
| g MGYG-HGUT-03578 | g Kazachstania                 | 0.067871756  | 0.380597466 | 0.90490297  |
| g MGYG-HGUT-03578 | g Malassezia                   | -0.064747342 | 0.40296001  | 0.912136453 |
| g MGYG-HGUT-03578 | g unclassified Fungi           | -0.071599258 | 0.354929394 | 0.900151743 |
| g MGYG-HGUT-03578 | g Fusarium                     | -0.080261956 | 0.299579237 | 0.89308096  |
| g MGYG-HGUT-03578 | g Mycosphaerella               | -0.084157754 | 0.276655958 | 0.888419029 |
| g MGYG-HGUT-03578 | g Simplicillium                | 0.007186117  | 0.926120145 | 0.996251765 |
| g MGYG-HGUT-03578 | g unclassified Cordycipitaceae | -0.036787959 | 0.634890428 | 0.954116909 |
| g MGYG-HGUT-03578 | g unidentified                 | 0.047026369  | 0.54375694  | 0.942564508 |
| g MGYG-HGUT-03613 | g Verticillium                 | -0.022401712 | 0.772507021 | 0.984510076 |
| g MGYG-HGUT-03613 | g unclassified Tremellomycetes | 0.135315086  | 0.079410393 | 0.8415005   |
| g MGYG-HGUT-03613 | g Candida                      | -0.038818682 | 0.616310269 | 0.952163468 |
| g MGYG-HGUT-03613 | g Cladosporium                 | -0.011910441 | 0.877852568 | 0.994526835 |
| g MGYG-HGUT-03613 | g Debaromyces                  | -0.065985531 | 0.39400764  | 0.907694413 |
| g MGYG-HGUT-03613 | g Aspergillus                  | -0.008408866 | 0.913594427 | 0.996251765 |
| g MGYG-HGUT-03613 | g Kazachstania                 | 0.029637225  | 0.702084233 | 0.967505184 |
| g MGYG-HGUT-03613 | g Malassezia                   | -0.088237232 | 0.25395428  | 0.874689648 |
| g MGYG-HGUT-03613 | g unclassified Fungi           | -0.144907924 | 0.060141356 | 0.832568254 |
| g MGYG-HGUT-03613 | g Fusarium                     | -0.159445947 | 0.038388731 | 0.808354944 |
| g MGYG-HGUT-03613 | g Mycosphaerella               | 0.05562757   | 0.472542869 | 0.928769554 |
| g MGYG-HGUT-03613 | g Simplicillium                | -0.069300449 | 0.37062861  | 0.901117392 |
| g MGYG-HGUT-03613 | g unclassified Cordycipitaceae | 0.053424374  | 0.490285243 | 0.932872225 |
| g MGYG-HGUT-03613 | g unidentified                 | -0.082489948 | 0.286320236 | 0.891214772 |
| g MGYG-HGUT-03427 | g Verticillium                 | 0.074194009  | 0.337717068 | 0.900151743 |
| g MGYG-HGUT-03427 | g unclassified Tremellomycetes | 0.022135087  | 0.775142002 | 0.984510076 |
| g MGYG-HGUT-03427 | g Candida                      | -0.081057792 | 0.294797295 | 0.892181547 |
| g MGYG-HGUT-03427 | g Cladosporium                 | 0.010560155  | 0.891610254 | 0.994653074 |
| g MGYG-HGUT-03427 | g Debaromyces                  | -0.080405085 | 0.298715456 | 0.892181547 |
| g MGYG-HGUT-03427 | g Aspergillus                  | -0.051860478 | 0.503091527 | 0.936357157 |
| g MGYG-HGUT-03427 | g Kazachstania                 | 0.053024653  | 0.493541824 | 0.933554982 |
| g MGYG-HGUT-03427 | g Malassezia                   | 0.07774333   | 0.315049079 | 0.898525398 |
| g MGYG-HGUT-03427 | g unclassified Fungi           | -0.094878464 | 0.219809076 | 0.874689648 |
| g MGYG-HGUT-03427 | g Fusarium                     | -0.153785966 | 0.045904406 | 0.825673201 |
| g MGYG-HGUT-03427 | g Mycosphaerella               | 0.01964347   | 0.799886251 | 0.987507186 |
| g MGYG-HGUT-03427 | g Simplicillium                | 0.052506511  | 0.497780219 | 0.93540393  |
| g MGYG-HGUT-03427 | g unclassified Cordycipitaceae | 0.074963703  | 0.332715258 | 0.900151743 |
| g MGYG-HGUT-03427 | g unidentified                 | -0.066662364 | 0.389162393 | 0.907127903 |
| g Lactonifactor   | g Verticillium                 | 0.142337756  | 0.064882249 | 0.836350979 |
| g Lactonifactor   | g unclassified Tremellomycetes | 0.012172274  | 0.875188921 | 0.994526835 |
| g Lactonifactor   | g Candida                      | -0.072008107 | 0.352181467 | 0.900151743 |
| g Lactonifactor   | g Cladosporium                 | -0.037739581 | 0.626154204 | 0.952753622 |
| g Lactonifactor   | g Debaromyces                  | -0.029936548 | 0.699220155 | 0.967505184 |
| g Lactonifactor   | g Aspergillus                  | -0.023509189 | 0.761590255 | 0.982076388 |
| g Lactonifactor   | g Kazachstania                 | -0.011441877 | 0.882622712 | 0.994526835 |
| g Lactonifactor   | g Malassezia                   | 0.009844792  | 0.898912289 | 0.995280411 |
| g Lactonifactor   | g unclassified Fungi           | -0.135381212 | 0.079262285 | 0.8415005   |
| g Lactonifactor   | g Fusarium                     | -0.117101984 | 0.129456394 | 0.849249996 |
| g Lactonifactor   | g Mycosphaerella               | -0.027315272 | 0.724441658 | 0.972631421 |
| g Lactonifactor   | g Simplicillium                | -0.038174764 | 0.62217623  | 0.952309753 |
| g Lactonifactor   | g unclassified Cordycipitaceae | 0.090562211  | 0.241607236 | 0.874689648 |
| g Lactonifactor   | g unidentified                 | -0.138614342 | 0.072288158 | 0.8415005   |
| g SZUA-378        | g Verticillium                 | 0.086964155  | 0.260896429 | 0.878368327 |
| g SZUA-378        | g unclassified Tremellomycetes | 0.004884184  | 0.94974777  | 0.99717368  |
| g SZUA-378        | g Candida                      | -0.109936252 | 0.154770675 | 0.850455179 |
| g SZUA-378        | g Cladosporium                 | -0.001694131 | 0.982559422 | 0.998625698 |
| g SZUA-378        | g Debaromyces                  | -0.130652687 | 0.090427936 | 0.8415005   |



|                   |                                |              |             |             |
|-------------------|--------------------------------|--------------|-------------|-------------|
| g SZUA-378        | g Aspergillus                  | -0.049511111 | 0.522654    | 0.939740222 |
| g SZUA-378        | g Kazachstania                 | 0.031523429  | 0.684107686 | 0.963892039 |
| g SZUA-378        | g Malassezia                   | 0.091265216  | 0.237957714 | 0.874689648 |
| g SZUA-378        | g unclassified_Fungi           | -0.018046558 | 0.815852232 | 0.991716521 |
| g SZUA-378        | g Fusarium                     | -0.063866789 | 0.409400628 | 0.913116876 |
| g SZUA-378        | g Mycosphaerella               | -0.09341991  | 0.227012917 | 0.874689648 |
| g SZUA-378        | g Simplicillium                | 0.014143428  | 0.855183219 | 0.994526835 |
| g SZUA-378        | g unclassified_Cordycipitaceae | 0.092747558  | 0.230389265 | 0.874689648 |
| g SZUA-378        | g unidentified                 | 0.046032286  | 0.552315788 | 0.942564508 |
| g UBA9414         | g Verticillium                 | -0.053653475 | 0.488423899 | 0.932872225 |
| g UBA9414         | g unclassified_Tremellomycetes | 0.094378011  | 0.222262274 | 0.874689648 |
| g UBA9414         | g Candida                      | -0.060742758 | 0.432735049 | 0.918239588 |
| g UBA9414         | g Cladosporium                 | -0.026043764 | 0.736785512 | 0.976057954 |
| g UBA9414         | g Debaryomyces                 | -0.058267881 | 0.451750276 | 0.923868417 |
| g UBA9414         | g Aspergillus                  | 0.007615685  | 0.921717462 | 0.996251765 |
| g UBA9414         | g Kazachstania                 | 0.090907135  | 0.239811778 | 0.874689648 |
| g UBA9414         | g Malassezia                   | 0.031969884  | 0.679878111 | 0.96323026  |
| g UBA9414         | g unclassified_Fungi           | -0.196839821 | 0.010315445 | 0.613926619 |
| g UBA9414         | g Fusarium                     | -0.071008825 | 0.358921373 | 0.900151743 |
| g UBA9414         | g Mycosphaerella               | -0.041440609 | 0.592677859 | 0.947273049 |
| g UBA9414         | g Simplicillium                | 0.039939607  | 0.606156719 | 0.950933357 |
| g UBA9414         | g unclassified_Cordycipitaceae | 0.047868309  | 0.536559533 | 0.941323418 |
| g UBA9414         | g unidentified                 | -0.064779286 | 0.402727504 | 0.912018644 |
| g Oribacterium    | g Verticillium                 | -0.007327277 | 0.924673125 | 0.996251765 |
| g Oribacterium    | g unclassified_Tremellomycetes | 0.013279483  | 0.863941027 | 0.994526835 |
| g Oribacterium    | g Candida                      | -0.044649703 | 0.56432741  | 0.942564508 |
| g Oribacterium    | g Cladosporium                 | 0.044749532  | 0.563455951 | 0.942564508 |
| g Oribacterium    | g Debaryomyces                 | -0.140765707 | 0.067929684 | 0.836350979 |
| g Oribacterium    | g Aspergillus                  | 0.042520058  | 0.583069519 | 0.945010741 |
| g Oribacterium    | g Kazachstania                 | 0.080877327  | 0.295877182 | 0.892181547 |
| g Oribacterium    | g Malassezia                   | 0.06230491   | 0.420972782 | 0.916661525 |
| g Oribacterium    | g unclassified_Fungi           | 0.041184634  | 0.594966842 | 0.947273049 |
| g Oribacterium    | g Fusarium                     | -0.071797151 | 0.353597657 | 0.900151743 |
| g Oribacterium    | g Mycosphaerella               | 0.022579776  | 0.770748713 | 0.984136305 |
| g Oribacterium    | g Simplicillium                | 0.081947622  | 0.289510913 | 0.891214772 |
| g Oribacterium    | g unclassified_Cordycipitaceae | 0.018516554  | 0.811145001 | 0.991049439 |
| g Oribacterium    | g unidentified                 | 0.155006718  | 0.044187142 | 0.817455693 |
| g UBA2821         | g Verticillium                 | -0.040539471 | 0.600753688 | 0.949569069 |
| g UBA2821         | g unclassified_Tremellomycetes | 0.093116641  | 0.228531489 | 0.874689648 |
| g UBA2821         | g Candida                      | -0.099162802 | 0.199592685 | 0.874689648 |
| g UBA2821         | g Cladosporium                 | 0.10722311   | 0.165271436 | 0.864354699 |
| g UBA2821         | g Debaryomyces                 | -0.1289553   | 0.094729344 | 0.8415005   |
| g UBA2821         | g Aspergillus                  | -0.002705363 | 0.972152498 | 0.998625698 |
| g UBA2821         | g Kazachstania                 | 0.141932645  | 0.065656665 | 0.836350979 |
| g UBA2821         | g Malassezia                   | 0.035887596  | 0.643202751 | 0.955341199 |
| g UBA2821         | g unclassified_Fungi           | -0.096874909 | 0.210214326 | 0.874689648 |
| g UBA2821         | g Fusarium                     | -0.117835883 | 0.127055147 | 0.849249996 |
| g UBA2821         | g Mycosphaerella               | -0.039584951 | 0.609361246 | 0.951102497 |
| g UBA2821         | g Simplicillium                | 0.049045896  | 0.52657312  | 0.940363396 |
| g UBA2821         | g unclassified_Cordycipitaceae | 0.005716166  | 0.941201952 | 0.996925697 |
| g UBA2821         | g unidentified                 | -0.038456509 | 0.619606632 | 0.952309753 |
| g MGYG-HGUT-04082 | g Verticillium                 | 0.179851302  | 0.019292682 | 0.702895198 |
| g MGYG-HGUT-04082 | g unclassified_Tremellomycetes | -0.004413139 | 0.954588778 | 0.99717368  |
| g MGYG-HGUT-04082 | g Candida                      | -0.043026348 | 0.578587888 | 0.944119536 |
| g MGYG-HGUT-04082 | g Cladosporium                 | 0.019583549  | 0.800483891 | 0.987523813 |
| g MGYG-HGUT-04082 | g Debaryomyces                 | -0.107816269 | 0.1629315   | 0.859887758 |
| g MGYG-HGUT-04082 | g Aspergillus                  | -0.013389789 | 0.862821909 | 0.994526835 |
| g MGYG-HGUT-04082 | g Kazachstania                 | -0.065861739 | 0.394895844 | 0.908782503 |
| g MGYG-HGUT-04082 | g Malassezia                   | 0.0871126    | 0.260080321 | 0.878368327 |
| g MGYG-HGUT-04082 | g unclassified_Fungi           | -0.077383942 | 0.317298171 | 0.898525398 |
| g MGYG-HGUT-04082 | g Fusarium                     | -0.194477666 | 0.011287023 | 0.650837983 |
| g MGYG-HGUT-04082 | g Mycosphaerella               | -0.00176993  | 0.981779225 | 0.998625698 |
| g MGYG-HGUT-04082 | g Simplicillium                | 0.060162743  | 0.437149814 | 0.919176572 |
| g MGYG-HGUT-04082 | g unclassified_Cordycipitaceae | 0.14612695   | 0.05799438  | 0.832568254 |
| g MGYG-HGUT-04082 | g unidentified                 | -0.039242911 | 0.612458816 | 0.951172976 |
| g MGYG-HGUT-00387 | g Verticillium                 | 0.014317132  | 0.853424475 | 0.994526835 |
| g MGYG-HGUT-00387 | g unclassified_Tremellomycetes | 0.049474083  | 0.522965389 | 0.939740222 |
| g MGYG-HGUT-00387 | g Candida                      | 0.00305412   | 0.968564315 | 0.998625698 |
| g MGYG-HGUT-00387 | g Cladosporium                 | 0.115974879  | 0.13321198  | 0.849249996 |
| g MGYG-HGUT-00387 | g Debaryomyces                 | -0.017148943 | 0.824860438 | 0.993104842 |
| g MGYG-HGUT-00387 | g Aspergillus                  | -0.018100043 | 0.815316217 | 0.991446871 |
| g MGYG-HGUT-00387 | g Kazachstania                 | 0.064855298  | 0.402174556 | 0.911885587 |
| g MGYG-HGUT-00387 | g Malassezia                   | 0.076557243  | 0.322511254 | 0.89909104  |
| g MGYG-HGUT-00387 | g unclassified_Fungi           | -0.086258765 | 0.264798449 | 0.878368327 |
| g MGYG-HGUT-00387 | g Fusarium                     | -0.073952646 | 0.339295361 | 0.900151743 |
| g MGYG-HGUT-00387 | g Mycosphaerella               | -0.004461044 | 0.954096365 | 0.99717368  |
| g MGYG-HGUT-00387 | g Simplicillium                | -0.009814905 | 0.899217545 | 0.995280411 |
| g MGYG-HGUT-00387 | g unclassified_Cordycipitaceae | -0.011103003 | 0.88607521  | 0.994526835 |

|                       |                                |              |             |             |
|-----------------------|--------------------------------|--------------|-------------|-------------|
| g MGYG-HGUT-00387     | g unidentified                 | -0.059759496 | 0.440234197 | 0.91979111  |
| g MGYG-HGUT-01252     | g Verticillium                 | 0.038677343  | 0.617595776 | 0.952309753 |
| g MGYG-HGUT-01252     | g unclassified Tremellomycetes | 0.096039705  | 0.21419105  | 0.874689648 |
| g MGYG-HGUT-01252     | g Candida                      | -0.102779944 | 0.183601587 | 0.873641816 |
| g MGYG-HGUT-01252     | g Cladosporium                 | 0.088149562  | 0.254428226 | 0.874689648 |
| g MGYG-HGUT-01252     | g Debaromyces                  | -0.231525051 | 0.002455681 | 0.550026842 |
| g MGYG-HGUT-01252     | g Aspergillus                  | -0.025661707 | 0.7405079   | 0.977217936 |
| g MGYG-HGUT-01252     | g Kazachstania                 | 0.030919763  | 0.689842258 | 0.96434561  |
| g MGYG-HGUT-01252     | g Malassezia                   | -0.021420256 | 0.782219074 | 0.986171666 |
| g MGYG-HGUT-01252     | g unclassified Fungi           | -0.019793037 | 0.798395001 | 0.987463135 |
| g MGYG-HGUT-01252     | g Fusarium                     | -0.058528855 | 0.449723315 | 0.922032734 |
| g MGYG-HGUT-01252     | g Mycosphaerella               | -0.103900185 | 0.178845198 | 0.872371283 |
| g MGYG-HGUT-01252     | g Simplicillium                | 0.060771159  | 0.432519529 | 0.918239588 |
| g MGYG-HGUT-01252     | g unclassified Cordycipitaceae | 0.079379285  | 0.30494259  | 0.897967316 |
| g MGYG-HGUT-01252     | g unidentified                 | -0.005345339 | 0.945010184 | 0.996925697 |
| g MGYG-HGUT-01247     | g Verticillium                 | 0.082245111  | 0.287757761 | 0.891214772 |
| g MGYG-HGUT-01247     | g unclassified Tremellomycetes | 0.008405126  | 0.913632705 | 0.996251765 |
| g MGYG-HGUT-01247     | g Candida                      | -0.109232687 | 0.157444199 | 0.855241398 |
| g MGYG-HGUT-01247     | g Cladosporium                 | 0.035539719  | 0.646426379 | 0.955501166 |
| g MGYG-HGUT-01247     | g Debaromyces                  | -0.075496284 | 0.329282211 | 0.899622647 |
| g MGYG-HGUT-01247     | g Aspergillus                  | 0.028535993  | 0.71265723  | 0.969617402 |
| g MGYG-HGUT-01247     | g Kazachstania                 | 0.038506043  | 0.619155347 | 0.952309753 |
| g MGYG-HGUT-01247     | g Malassezia                   | 0.090512325  | 0.241867689 | 0.874689648 |
| g MGYG-HGUT-01247     | g unclassified Fungi           | -0.133039212 | 0.08464516  | 0.8415005   |
| g MGYG-HGUT-01247     | g Fusarium                     | -0.126631204 | 0.100880648 | 0.8415005   |
| g MGYG-HGUT-01247     | g Mycosphaerella               | -0.068272426 | 0.377785416 | 0.904606345 |
| g MGYG-HGUT-01247     | g Simplicillium                | 0.059532404  | 0.441976628 | 0.92043404  |
| g MGYG-HGUT-01247     | g unclassified Cordycipitaceae | 0.114990794  | 0.136558859 | 0.849249996 |
| g MGYG-HGUT-01247     | g unidentified                 | 0.00625913   | 0.935628385 | 0.996251765 |
| g MGYG-HGUT-02210     | g Verticillium                 | 0.077987886  | 0.313524566 | 0.898525398 |
| g MGYG-HGUT-02210     | g unclassified Tremellomycetes | 0.017407703  | 0.822261195 | 0.992484281 |
| g MGYG-HGUT-02210     | g Candida                      | -0.077895864 | 0.314097645 | 0.898525398 |
| g MGYG-HGUT-02210     | g Cladosporium                 | 0.018997851  | 0.806331599 | 0.989125825 |
| g MGYG-HGUT-02210     | g Debaromyces                  | -0.053933231 | 0.486156144 | 0.932872225 |
| g MGYG-HGUT-02210     | g Aspergillus                  | -0.017856428 | 0.817758346 | 0.991841934 |
| g MGYG-HGUT-02210     | g Kazachstania                 | -0.024200554 | 0.754798847 | 0.980873421 |
| g MGYG-HGUT-02210     | g Malassezia                   | 0.078890589  | 0.307939037 | 0.897967316 |
| g MGYG-HGUT-02210     | g unclassified Fungi           | 0.040881794  | 0.597680052 | 0.948266952 |
| g MGYG-HGUT-02210     | g Fusarium                     | -0.062014252 | 0.423147106 | 0.918013177 |
| g MGYG-HGUT-02210     | g Mycosphaerella               | -0.051263161 | 0.50802859  | 0.936546622 |
| g MGYG-HGUT-02210     | g Simplicillium                | -0.005337506 | 0.945090638 | 0.996925697 |
| g MGYG-HGUT-02210     | g unclassified Cordycipitaceae | 0.094825715  | 0.220066736 | 0.874689648 |
| g MGYG-HGUT-02210     | g unidentified                 | 0.069851952  | 0.366823827 | 0.901117392 |
| g MGYG-HGUT-02075     | g Verticillium                 | -0.032557988 | 0.674321824 | 0.961701261 |
| g MGYG-HGUT-02075     | g unclassified Tremellomycetes | -0.131359875 | 0.088682426 | 0.8415005   |
| g MGYG-HGUT-02075     | g Candida                      | -0.028021274 | 0.717618063 | 0.97067915  |
| g MGYG-HGUT-02075     | g Cladosporium                 | -0.02122833  | 0.784122273 | 0.986469481 |
| g MGYG-HGUT-02075     | g Debaromyces                  | -0.117342264 | 0.128666406 | 0.849249996 |
| g MGYG-HGUT-02075     | g Aspergillus                  | -0.040775583 | 0.598632933 | 0.948266952 |
| g MGYG-HGUT-02075     | g Kazachstania                 | 0.071168261  | 0.357840666 | 0.900151743 |
| g MGYG-HGUT-02075     | g Malassezia                   | -0.007780802 | 0.920025793 | 0.996251765 |
| g MGYG-HGUT-02075     | g unclassified Fungi           | 0.016898251  | 0.827380457 | 0.993650851 |
| g MGYG-HGUT-02075     | g Fusarium                     | -0.052895715 | 0.49459474  | 0.934004873 |
| g MGYG-HGUT-02075     | g Mycosphaerella               | -0.035682821 | 0.645099512 | 0.955501166 |
| g MGYG-HGUT-02075     | g Simplicillium                | 0.067027256  | 0.386566059 | 0.906174944 |
| g MGYG-HGUT-02075     | g unclassified Cordycipitaceae | -0.03332503  | 0.667101361 | 0.959868552 |
| g MGYG-HGUT-02075     | g unidentified                 | 0.137598356  | 0.074423936 | 0.8415005   |
| g Eubacterium J       | g Verticillium                 | 0.056810111  | 0.463166329 | 0.927602832 |
| g Eubacterium J       | g unclassified Tremellomycetes | 0.006648176  | 0.931636695 | 0.996251765 |
| g Eubacterium J       | g Candida                      | -0.089686753 | 0.246206363 | 0.874689648 |
| g Eubacterium J       | g Cladosporium                 | -0.00634096  | 0.934788652 | 0.996251765 |
| g Eubacterium J       | g Debaromyces                  | -0.131825684 | 0.08754747  | 0.8415005   |
| g Eubacterium J       | g Aspergillus                  | 0.021854536  | 0.777917383 | 0.984731701 |
| g Eubacterium J       | g Kazachstania                 | 0.112754633  | 0.144402751 | 0.849249996 |
| g Eubacterium J       | g Malassezia                   | 0.029744831  | 0.701054116 | 0.967505184 |
| g Eubacterium J       | g unclassified Fungi           | -0.095831315 | 0.215191598 | 0.874689648 |
| g Eubacterium J       | g Fusarium                     | -0.064992506 | 0.401177578 | 0.910743236 |
| g Eubacterium J       | g Mycosphaerella               | -0.071305826 | 0.356909838 | 0.900151743 |
| g Eubacterium J       | g Simplicillium                | 0.073001158  | 0.345562797 | 0.900151743 |
| g Eubacterium J       | g unclassified Cordycipitaceae | 0.072650402  | 0.347891547 | 0.900151743 |
| g Eubacterium J       | g unidentified                 | 0.036115687  | 0.641092727 | 0.955341199 |
| g Lachnoanaerobaculum | g Verticillium                 | -0.06879471  | 0.37413894  | 0.902197037 |
| g Lachnoanaerobaculum | g unclassified Tremellomycetes | 0.046006751  | 0.552536497 | 0.942564508 |
| g Lachnoanaerobaculum | g Candida                      | -0.035930573 | 0.64280496  | 0.955341199 |
| g Lachnoanaerobaculum | g Cladosporium                 | 0.072943257  | 0.345946535 | 0.900151743 |
| g Lachnoanaerobaculum | g Debaromyces                  | -0.14334529  | 0.06298858  | 0.832568254 |
| g Lachnoanaerobaculum | g Aspergillus                  | 0.090417535  | 0.242363116 | 0.874689648 |
| g Lachnoanaerobaculum | g Kazachstania                 | 0.131172375  | 0.089142579 | 0.8415005   |

|                       |                                |              |             |             |
|-----------------------|--------------------------------|--------------|-------------|-------------|
| g Lachnoanaerobaculum | g Malassezia                   | 0.039348173  | 0.611504816 | 0.951172976 |
| g Lachnoanaerobaculum | g unclassified Fungi           | -0.011627837 | 0.880729054 | 0.994526835 |
| g Lachnoanaerobaculum | g Fusarium                     | 0.003131642  | 0.96776682  | 0.998625698 |
| g Lachnoanaerobaculum | g Mycosphaerella               | -0.061661814 | 0.425792309 | 0.918239588 |
| g Lachnoanaerobaculum | g Simplicillium                | 0.074222897  | 0.337528481 | 0.900151743 |
| g Lachnoanaerobaculum | g unclassified Cordycipitaceae | -0.024675436 | 0.750144819 | 0.980149568 |
| g Lachnoanaerobaculum | g unidentified                 | 0.110585665  | 0.152333385 | 0.84984956  |
| g CAG-194             | g Verticillium                 | 0.110401255  | 0.153022526 | 0.85006873  |
| g CAG-194             | g unclassified Tremellomycetes | 0.042651322  | 0.581906045 | 0.944873255 |
| g CAG-194             | g Candida                      | -0.038804449 | 0.61643967  | 0.952163468 |
| g CAG-194             | g Cladosporium                 | 0.096277883  | 0.213051553 | 0.874689648 |
| g CAG-194             | g Debaromyces                  | -0.133540024 | 0.083470116 | 0.8415005   |
| g CAG-194             | g Aspergillus                  | 0.027133298  | 0.726204009 | 0.972631421 |
| g CAG-194             | g Kazachstania                 | 0.109433699  | 0.156676846 | 0.852299868 |
| g CAG-194             | g Malassezia                   | 0.111708232  | 0.148188761 | 0.849249996 |
| g CAG-194             | g unclassified Fungi           | -0.035489204 | 0.646895036 | 0.955501166 |
| g CAG-194             | g Fusarium                     | -0.090488047 | 0.241994511 | 0.874689648 |
| g CAG-194             | g Mycosphaerella               | -0.018272575 | 0.813587735 | 0.991049439 |
| g CAG-194             | g Simplicillium                | 0.141277646  | 0.066924729 | 0.836350979 |
| g CAG-194             | g unclassified Cordycipitaceae | 0.103757658  | 0.179445252 | 0.872371283 |
| g CAG-194             | g unidentified                 | 0.043598551  | 0.573542213 | 0.943226463 |
| g MGYG-HGUT-01199     | g Verticillium                 | 0.09251596   | 0.231560427 | 0.874689648 |
| g MGYG-HGUT-01199     | g unclassified Tremellomycetes | -0.071826823 | 0.35339825  | 0.900151743 |
| g MGYG-HGUT-01199     | g Candida                      | -0.05645149  | 0.465998983 | 0.927602832 |
| g MGYG-HGUT-01199     | g Cladosporium                 | -0.029395695 | 0.704398371 | 0.967508066 |
| g MGYG-HGUT-01199     | g Debaromyces                  | -0.107772158 | 0.163104658 | 0.859887758 |
| g MGYG-HGUT-01199     | g Aspergillus                  | -0.03423371  | 0.658587023 | 0.956966684 |
| g MGYG-HGUT-01199     | g Kazachstania                 | 0.018056889  | 0.815748692 | 0.991716521 |
| g MGYG-HGUT-01199     | g Malassezia                   | 0.000818272  | 0.991575618 | 0.999049974 |
| g MGYG-HGUT-01199     | g unclassified Fungi           | 8.06E-05     | 0.99917026  | 0.999603646 |
| g MGYG-HGUT-01199     | g Fusarium                     | -0.127091031 | 0.099639209 | 0.8415005   |
| g MGYG-HGUT-01199     | g Mycosphaerella               | -0.045803903 | 0.554291334 | 0.942564508 |
| g MGYG-HGUT-01199     | g Simplicillium                | -0.060008163 | 0.438330718 | 0.919726905 |
| g MGYG-HGUT-01199     | g unclassified Cordycipitaceae | 0.057640993  | 0.456640117 | 0.924332119 |
| g MGYG-HGUT-01199     | g unidentified                 | 0.08117292   | 0.294109742 | 0.892181547 |
| g NC2004              | g Verticillium                 | -0.017853152 | 0.817791198 | 0.991841934 |
| g NC2004              | g unclassified Tremellomycetes | -0.023749923 | 0.759223384 | 0.982076388 |
| g NC2004              | g Candida                      | -0.036504746 | 0.637500257 | 0.954338328 |
| g NC2004              | g Cladosporium                 | 0.028668848  | 0.711378728 | 0.968802592 |
| g NC2004              | g Debaromyces                  | -0.187031138 | 0.014896519 | 0.702895198 |
| g NC2004              | g Aspergillus                  | 0.10510183   | 0.173844811 | 0.869335176 |
| g NC2004              | g Kazachstania                 | 0.193110125  | 0.011885563 | 0.659702633 |
| g NC2004              | g Malassezia                   | 0.025515815  | 0.741930916 | 0.977585637 |
| g NC2004              | g unclassified Fungi           | 0.041150476  | 0.595272594 | 0.947273049 |
| g NC2004              | g Fusarium                     | -0.113755814 | 0.140849564 | 0.849249996 |
| g NC2004              | g Mycosphaerella               | -0.045785272 | 0.55445264  | 0.942564508 |
| g NC2004              | g Simplicillium                | 0.118828505  | 0.123862211 | 0.849176369 |
| g NC2004              | g unclassified Cordycipitaceae | 0.035608084  | 0.645792354 | 0.955501166 |
| g NC2004              | g unidentified                 | 0.056877518  | 0.462634968 | 0.927602832 |
| g MGYG-HGUT-02949     | g Verticillium                 | 0.02470667   | 0.749839027 | 0.980027605 |
| g MGYG-HGUT-02949     | g unclassified Tremellomycetes | 0.147787549  | 0.055171631 | 0.832568254 |
| g MGYG-HGUT-02949     | g Candida                      | -0.103162733 | 0.181965985 | 0.872371283 |
| g MGYG-HGUT-02949     | g Cladosporium                 | -0.014731327 | 0.849233715 | 0.994526835 |
| g MGYG-HGUT-02949     | g Debaromyces                  | 0.006253726  | 0.935683837 | 0.996251765 |
| g MGYG-HGUT-02949     | g Aspergillus                  | -0.02984821  | 0.700064976 | 0.967505184 |
| g MGYG-HGUT-02949     | g Kazachstania                 | 0.107367936  | 0.164697814 | 0.864354699 |
| g MGYG-HGUT-02949     | g Malassezia                   | 0.021335202  | 0.783062334 | 0.986399684 |
| g MGYG-HGUT-02949     | g unclassified Fungi           | -0.204069082 | 0.007784563 | 0.613926619 |
| g MGYG-HGUT-02949     | g Fusarium                     | -0.044891847 | 0.562214732 | 0.942564508 |
| g MGYG-HGUT-02949     | g Mycosphaerella               | -0.023486686 | 0.761811614 | 0.982076388 |
| g MGYG-HGUT-02949     | g Simplicillium                | -0.076086244 | 0.325505944 | 0.899370541 |
| g MGYG-HGUT-02949     | g unclassified Cordycipitaceae | 0.065756949  | 0.395649994 | 0.909025558 |
| g MGYG-HGUT-02949     | g unidentified                 | -0.113197878 | 0.14282137  | 0.849249996 |
| g MGYG-HGUT-02256     | g Verticillium                 | 0.045061979  | 0.560732624 | 0.942564508 |
| g MGYG-HGUT-02256     | g unclassified Tremellomycetes | -0.007657547 | 0.921288547 | 0.996251765 |
| g MGYG-HGUT-02256     | g Candida                      | -0.207048196 | 0.006913505 | 0.613926619 |
| g MGYG-HGUT-02256     | g Cladosporium                 | 0.041966935  | 0.587983958 | 0.947150582 |
| g MGYG-HGUT-02256     | g Debaromyces                  | -0.167493991 | 0.029505778 | 0.782890491 |
| g MGYG-HGUT-02256     | g Aspergillus                  | 0.094488218  | 0.221720384 | 0.874689648 |
| g MGYG-HGUT-02256     | g Kazachstania                 | 0.070704797  | 0.360987803 | 0.900157702 |
| g MGYG-HGUT-02256     | g Malassezia                   | 0.131711943  | 0.087823528 | 0.8415005   |
| g MGYG-HGUT-02256     | g unclassified Fungi           | -0.00799331  | 0.91784911  | 0.996251765 |
| g MGYG-HGUT-02256     | g Fusarium                     | -0.089093914 | 0.249355101 | 0.874689648 |
| g MGYG-HGUT-02256     | g Mycosphaerella               | -0.067838924 | 0.380828454 | 0.90490297  |
| g MGYG-HGUT-02256     | g Simplicillium                | 0.187096143  | 0.014861089 | 0.702895198 |
| g MGYG-HGUT-02256     | g unclassified Cordycipitaceae | 0.089187634  | 0.248855481 | 0.874689648 |
| g MGYG-HGUT-02256     | g unidentified                 | 0.157429797  | 0.040937453 | 0.808354944 |
| g TWA4                | g Verticillium                 | -0.022065747 | 0.775827694 | 0.984510076 |

|                   |                                |              |             |             |
|-------------------|--------------------------------|--------------|-------------|-------------|
| g TWA4            | g unclassified Tremellomycetes | 0.199058459  | 0.009470858 | 0.613926619 |
| g TWA4            | g Candida                      | -0.130638305 | 0.090463718 | 0.8415005   |
| g TWA4            | g Cladosporium                 | 0.093021382  | 0.22900996  | 0.874689648 |
| g TWA4            | g Debaromyces                  | -0.074991893 | 0.332532971 | 0.900151743 |
| g TWA4            | g Aspergillus                  | -0.045968894 | 0.55286379  | 0.942564508 |
| g TWA4            | g Kazachstania                 | 0.100059114  | 0.19553925  | 0.874689648 |
| g TWA4            | g Malassezia                   | -0.069654994 | 0.368179848 | 0.901117392 |
| g TWA4            | g unclassified Fungi           | -0.057928873 | 0.454390946 | 0.924332119 |
| g TWA4            | g Fusarium                     | 0.071961478  | 0.35249419  | 0.900151743 |
| g TWA4            | g Mycosphaerella               | 0.007478661  | 0.923121588 | 0.996251765 |
| g TWA4            | g Simplicillium                | 0.043718498  | 0.572487145 | 0.942985175 |
| g TWA4            | g unclassified Cordycipitaceae | 0.037080333  | 0.632200891 | 0.954068873 |
| g TWA4            | g unidentified                 | -0.050692382 | 0.512769744 | 0.938277062 |
| g MGYG-HGUT-03517 | g Verticillium                 | 0.084221272  | 0.276292306 | 0.888419029 |
| g MGYG-HGUT-03517 | g unclassified Tremellomycetes | -0.052348822 | 0.499073912 | 0.93624561  |
| g MGYG-HGUT-03517 | g Candida                      | -0.184770881 | 0.016175161 | 0.702895198 |
| g MGYG-HGUT-03517 | g Cladosporium                 | 0.049566359  | 0.522189558 | 0.939740222 |
| g MGYG-HGUT-03517 | g Debaromyces                  | -0.129605292 | 0.093063369 | 0.8415005   |
| g MGYG-HGUT-03517 | g Aspergillus                  | -0.023168985 | 0.764938866 | 0.982494893 |
| g MGYG-HGUT-03517 | g Kazachstania                 | 0.022717256  | 0.76939195  | 0.98374619  |
| g MGYG-HGUT-03517 | g Malassezia                   | 0.089459394  | 0.24741065  | 0.874689648 |
| g MGYG-HGUT-03517 | g unclassified Fungi           | -0.118512407 | 0.124872188 | 0.849176369 |
| g MGYG-HGUT-03517 | g Fusarium                     | -0.135841358 | 0.078237826 | 0.8415005   |
| g MGYG-HGUT-03517 | g Mycosphaerella               | -0.015494746 | 0.841520678 | 0.994526835 |
| g MGYG-HGUT-03517 | g Simplicillium                | 0.109187395  | 0.157617488 | 0.855241398 |
| g MGYG-HGUT-03517 | g unclassified Cordycipitaceae | 0.034507046  | 0.656034354 | 0.956614192 |
| g MGYG-HGUT-03517 | g unidentified                 | 0.066353679  | 0.391366981 | 0.907694413 |
| g MGYG-HGUT-00346 | g Verticillium                 | 0.064797682  | 0.402593641 | 0.911939341 |
| g MGYG-HGUT-00346 | g unclassified Tremellomycetes | 0.110269429  | 0.153516596 | 0.85006873  |
| g MGYG-HGUT-00346 | g Candida                      | -0.0809373   | 0.295518019 | 0.892181547 |
| g MGYG-HGUT-00346 | g Cladosporium                 | 0.110010658  | 0.154489944 | 0.850069503 |
| g MGYG-HGUT-00346 | g Debaromyces                  | -0.123120541 | 0.110765561 | 0.843328451 |
| g MGYG-HGUT-00346 | g Aspergillus                  | 0.00330694   | 0.965963577 | 0.998625698 |
| g MGYG-HGUT-00346 | g Kazachstania                 | 0.014194163  | 0.854669455 | 0.994526835 |
| g MGYG-HGUT-00346 | g Malassezia                   | 0.07130878   | 0.356889861 | 0.900151743 |
| g MGYG-HGUT-00346 | g unclassified Fungi           | -0.015252096 | 0.84397064  | 0.994526835 |
| g MGYG-HGUT-00346 | g Fusarium                     | -0.027261903 | 0.724958375 | 0.972631421 |
| g MGYG-HGUT-00346 | g Mycosphaerella               | -0.074904944 | 0.33309542  | 0.900151743 |
| g MGYG-HGUT-00346 | g Simplicillium                | 0.057328059  | 0.459092042 | 0.926012938 |
| g MGYG-HGUT-00346 | g unclassified Cordycipitaceae | 0.121956768  | 0.11420462  | 0.843328451 |
| g MGYG-HGUT-00346 | g unidentified                 | 0.002572294  | 0.973521717 | 0.998625698 |
| g MGYG-HGUT-04604 | g Verticillium                 | -0.062175604 | 0.421939277 | 0.916999262 |
| g MGYG-HGUT-04604 | g unclassified Tremellomycetes | -0.028179688 | 0.716090005 | 0.9067915   |
| g MGYG-HGUT-04604 | g Candida                      | -0.096618929 | 0.211427478 | 0.874689648 |
| g MGYG-HGUT-04604 | g Cladosporium                 | -0.021129507 | 0.785102742 | 0.986710331 |
| g MGYG-HGUT-04604 | g Debaromyces                  | -0.059107315 | 0.445248731 | 0.921010267 |
| g MGYG-HGUT-04604 | g Aspergillus                  | -0.065127035 | 0.400201503 | 0.910065    |
| g MGYG-HGUT-04604 | g Kazachstania                 | 0.043562297  | 0.57386128  | 0.943352947 |
| g MGYG-HGUT-04604 | g Malassezia                   | 0.048713763  | 0.52938019  | 0.940412658 |
| g MGYG-HGUT-04604 | g unclassified Fungi           | 0.041371026  | 0.593299689 | 0.947273049 |
| g MGYG-HGUT-04604 | g Fusarium                     | -0.105700009 | 0.17139455  | 0.867877301 |
| g MGYG-HGUT-04604 | g Mycosphaerella               | -0.074662838 | 0.334664739 | 0.900151743 |
| g MGYG-HGUT-04604 | g Simplicillium                | 0.0313446    | 0.685804626 | 0.963892039 |
| g MGYG-HGUT-04604 | g unclassified Cordycipitaceae | -0.074996442 | 0.332503562 | 0.900151743 |
| g MGYG-HGUT-04604 | g unidentified                 | 0.125077312  | 0.105166406 | 0.841929371 |
| g MGYG-HGUT-03366 | g Verticillium                 | 0.022041498  | 0.77606753  | 0.984510076 |
| g MGYG-HGUT-03366 | g unclassified Tremellomycetes | 0.059200682  | 0.444528875 | 0.921010267 |
| g MGYG-HGUT-03366 | g Candida                      | -0.029457977 | 0.703801373 | 0.967508066 |
| g MGYG-HGUT-03366 | g Cladosporium                 | 0.072816628  | 0.346786705 | 0.900151743 |
| g MGYG-HGUT-03366 | g Debaromyces                  | -0.028883241 | 0.709317253 | 0.968724426 |
| g MGYG-HGUT-03366 | g Aspergillus                  | 0.036345734  | 0.638967519 | 0.955293199 |
| g MGYG-HGUT-03366 | g Kazachstania                 | 0.030467962  | 0.694145777 | 0.966086731 |
| g MGYG-HGUT-03366 | g Malassezia                   | 0.027591798  | 0.721766387 | 0.971835476 |
| g MGYG-HGUT-03366 | g unclassified Fungi           | -0.005160868 | 0.946905093 | 0.996925697 |
| g MGYG-HGUT-03366 | g Fusarium                     | -0.077110577 | 0.319015894 | 0.988536448 |
| g MGYG-HGUT-03366 | g Mycosphaerella               | 0.027097799  | 0.726547975 | 0.972631421 |
| g MGYG-HGUT-03366 | g Simplicillium                | 0.008106951  | 0.916685359 | 0.996251765 |
| g MGYG-HGUT-03366 | g unclassified Cordycipitaceae | -0.060420892 | 0.435181756 | 0.91904345  |
| g MGYG-HGUT-03366 | g unidentified                 | -0.049189364 | 0.525362921 | 0.939740222 |
| g Bariatricus     | g Verticillium                 | 0.099138292  | 0.199704373 | 0.874689648 |
| g Bariatricus     | g unclassified Tremellomycetes | 0.053757863  | 0.487577051 | 0.932872225 |
| g Bariatricus     | g Candida                      | -0.060584199 | 0.433939367 | 0.918239588 |
| g Bariatricus     | g Cladosporium                 | -0.006836618 | 0.929703852 | 0.996251765 |
| g Bariatricus     | g Debaromyces                  | -0.023577958 | 0.760913897 | 0.982076388 |
| g Bariatricus     | g Aspergillus                  | -0.032575193 | 0.674159533 | 0.961701261 |
| g Bariatricus     | g Kazachstania                 | 0.038453833  | 0.619631022 | 0.952309753 |
| g Bariatricus     | g Malassezia                   | 0.125188103  | 0.104856171 | 0.841929371 |
| g Bariatricus     | g unclassified Fungi           | -0.177311772 | 0.021096639 | 0.740066897 |



|                     |                                |              |             |             |
|---------------------|--------------------------------|--------------|-------------|-------------|
| g Bariatricus       | g Fusarium                     | -0.204024301 | 0.007798368 | 0.613926619 |
| g Bariatricus       | g Mycosphaerella               | -0.066200601 | 0.392463024 | 0.907694413 |
| g Bariatricus       | g Simplicillium                | -0.024219145 | 0.754616482 | 0.980873421 |
| g Bariatricus       | g unclassified Cordycipitaceae | 0.161728718  | 0.035665625 | 0.808354944 |
| g Bariatricus       | g unidentified                 | -0.033816352 | 0.662492313 | 0.959259869 |
| g MGYG-HGUT-04132   | g Verticillium                 | 0.108153014  | 0.161614153 | 0.859887758 |
| g MGYG-HGUT-04132   | g unclassified Tremellomycetes | 0.044154634  | 0.568658569 | 0.942564508 |
| g MGYG-HGUT-04132   | g Candida                      | -0.021719219 | 0.779257026 | 0.985246269 |
| g MGYG-HGUT-04132   | g Cladosporium                 | 0.051298124  | 0.50773892  | 0.936546622 |
| g MGYG-HGUT-04132   | g Debaromyces                  | -0.090122869 | 0.243907729 | 0.874689648 |
| g MGYG-HGUT-04132   | g Aspergillus                  | 0.025310184  | 0.743938115 | 0.978404143 |
| g MGYG-HGUT-04132   | g Kazachstania                 | 0.154067767  | 0.045503122 | 0.825673201 |
| g MGYG-HGUT-04132   | g Malassezia                   | 0.009714027  | 0.900247992 | 0.995280411 |
| g MGYG-HGUT-04132   | g unclassified Fungi           | -0.08206376  | 0.288825648 | 0.891214772 |
| g MGYG-HGUT-04132   | g Fusarium                     | -0.165243877 | 0.031792538 | 0.796627796 |
| g MGYG-HGUT-04132   | g Mycosphaerella               | -0.088730083 | 0.251301269 | 0.874689648 |
| g MGYG-HGUT-04132   | g Simplicillium                | 0.121405142  | 0.115863559 | 0.845352813 |
| g MGYG-HGUT-04132   | g unclassified Cordycipitaceae | 0.071106158  | 0.358261377 | 0.900151743 |
| g MGYG-HGUT-04132   | g unidentified                 | -0.113622095 | 0.14132024  | 0.849249996 |
| g MGYG-HGUT-04210   | g Verticillium                 | -0.083405897 | 0.280985052 | 0.8902203   |
| g MGYG-HGUT-04210   | g unclassified Tremellomycetes | 0.031304428  | 0.686186038 | 0.963892039 |
| g MGYG-HGUT-04210   | g Candida                      | -0.104181861 | 0.177663656 | 0.872371283 |
| g MGYG-HGUT-04210   | g Cladosporium                 | 0.051042707  | 0.509857083 | 0.937011504 |
| g MGYG-HGUT-04210   | g Debaromyces                  | -0.098615311 | 0.202098358 | 0.874689648 |
| g MGYG-HGUT-04210   | g Aspergillus                  | 0.002213571  | 0.977213211 | 0.998625698 |
| g MGYG-HGUT-04210   | g Kazachstania                 | 0.089733275  | 0.245960445 | 0.874689648 |
| g MGYG-HGUT-04210   | g Malassezia                   | -0.06311604  | 0.414939442 | 0.915844807 |
| g MGYG-HGUT-04210   | g unclassified Fungi           | -0.123207224 | 0.110512684 | 0.843328451 |
| g MGYG-HGUT-04210   | g Fusarium                     | -0.078274617 | 0.311743288 | 0.897967316 |
| g MGYG-HGUT-04210   | g Mycosphaerella               | -0.035059319 | 0.650888879 | 0.955597379 |
| g MGYG-HGUT-04210   | g Simplicillium                | 0.012257628  | 0.874320905 | 0.994526835 |
| g MGYG-HGUT-04210   | g unclassified Cordycipitaceae | 0.017086873  | 0.825484213 | 0.993596523 |
| g MGYG-HGUT-04210   | g unidentified                 | -0.031243433 | 0.68676531  | 0.963892039 |
| g Ruminococcus G    | g Verticillium                 | -0.016359382 | 0.832803232 | 0.994526835 |
| g Ruminococcus G    | g unclassified Tremellomycetes | 0.089595448  | 0.246689504 | 0.874689648 |
| g Ruminococcus G    | g Candida                      | -0.019832127 | 0.798005372 | 0.987463135 |
| g Ruminococcus G    | g Cladosporium                 | 0.021732939  | 0.779121173 | 0.985246269 |
| g Ruminococcus G    | g Debaromyces                  | -0.034767323 | 0.653607343 | 0.956331535 |
| g Ruminococcus G    | g Aspergillus                  | -0.01896785  | 0.806631425 | 0.989255135 |
| g Ruminococcus G    | g Kazachstania                 | 0.051194784  | 0.508595358 | 0.936621389 |
| g Ruminococcus G    | g Malassezia                   | -0.066378605 | 0.391188687 | 0.907694413 |
| g Ruminococcus G    | g unclassified Fungi           | -0.117018383 | 0.129732131 | 0.849249996 |
| g Ruminococcus G    | g Fusarium                     | -0.033515299 | 0.665314975 | 0.959776195 |
| g Ruminococcus G    | g Mycosphaerella               | -0.050316716 | 0.515902614 | 0.938796978 |
| g Ruminococcus G    | g Simplicillium                | -0.008776167 | 0.90983584  | 0.996251765 |
| g Ruminococcus G    | g unclassified Cordycipitaceae | 0.07287018   | 0.346431238 | 0.900151743 |
| g Ruminococcus G    | g unidentified                 | -0.096170409 | 0.213565192 | 0.874689648 |
| g MGYG-HGUT-01603   | g Verticillium                 | 0.015771794  | 0.83872527  | 0.994526835 |
| g MGYG-HGUT-01603   | g unclassified Tremellomycetes | 0.082467274  | 0.28645316  | 0.891214772 |
| g MGYG-HGUT-01603   | g Candida                      | 0.000186642  | 0.998078421 | 0.999334917 |
| g MGYG-HGUT-01603   | g Cladosporium                 | 0.073910886  | 0.339568905 | 0.900151743 |
| g MGYG-HGUT-01603   | g Debaromyces                  | -0.037587645 | 0.627545589 | 0.95290209  |
| g MGYG-HGUT-01603   | g Aspergillus                  | -0.02833347  | 0.714607713 | 0.970380158 |
| g MGYG-HGUT-01603   | g Kazachstania                 | -0.033267376 | 0.667643032 | 0.960290166 |
| g MGYG-HGUT-01603   | g Malassezia                   | 0.079459529  | 0.30445241  | 0.897967316 |
| g MGYG-HGUT-01603   | g unclassified Fungi           | -0.101270148 | 0.190157994 | 0.87463999  |
| g MGYG-HGUT-01603   | g Fusarium                     | -0.023388596 | 0.762776746 | 0.982076388 |
| g MGYG-HGUT-01603   | g Mycosphaerella               | -0.10217742  | 0.186197913 | 0.873641816 |
| g MGYG-HGUT-01603   | g Simplicillium                | 0.049174945  | 0.525484479 | 0.939740222 |
| g MGYG-HGUT-01603   | g unclassified Cordycipitaceae | 0.074443599  | 0.3360899   | 0.900151743 |
| g MGYG-HGUT-01603   | g unidentified                 | -0.126708444 | 0.100671267 | 0.8415005   |
| g MGYG-HGUT-02655   | g Verticillium                 | 0.027855521  | 0.719218106 | 0.970812911 |
| g MGYG-HGUT-02655   | g unclassified Tremellomycetes | -0.126384386 | 0.101552027 | 0.8415005   |
| g MGYG-HGUT-02655   | g Candida                      | -0.0711953   | 0.357657585 | 0.900151743 |
| g MGYG-HGUT-02655   | g Cladosporium                 | 0.014972109  | 0.846799441 | 0.994526835 |
| g MGYG-HGUT-02655   | g Debaromyces                  | -0.058109541 | 0.452982579 | 0.923868417 |
| g MGYG-HGUT-02655   | g Aspergillus                  | -0.010717342 | 0.890006979 | 0.994653074 |
| g MGYG-HGUT-02655   | g Kazachstania                 | -0.03332582  | 0.66709394  | 0.959868552 |
| g MGYG-HGUT-02655   | g Malassezia                   | -0.020918321 | 0.787199138 | 0.986710331 |
| g MGYG-HGUT-02655   | g unclassified Fungi           | 0.006237773  | 0.935847556 | 0.996251765 |
| g MGYG-HGUT-02655   | g Fusarium                     | -0.065672201 | 0.396260541 | 0.909420539 |
| g MGYG-HGUT-02655   | g Mycosphaerella               | -0.116813324 | 0.130410377 | 0.849249996 |
| g MGYG-HGUT-02655   | g Simplicillium                | 0.09019296   | 0.2435397   | 0.874689648 |
| g MGYG-HGUT-02655   | g unclassified Cordycipitaceae | 0.008674087  | 0.910880234 | 0.996251765 |
| g MGYG-HGUT-02655   | g unidentified                 | 0.063987489  | 0.408514221 | 0.913116876 |
| g Anaerosporobacter | g Verticillium                 | 0.015596968  | 0.840489032 | 0.994526835 |
| g Anaerosporobacter | g unclassified Tremellomycetes | 0.123486245  | 0.109701769 | 0.843328451 |
| g Anaerosporobacter | g Candida                      | -0.158054572 | 0.040132871 | 0.808354944 |

|                     |                                |              |             |             |
|---------------------|--------------------------------|--------------|-------------|-------------|
| g Anaerosporobacter | g Cladosporium                 | -0.039069089 | 0.614035621 | 0.951172976 |
| g Anaerosporobacter | g Debaryomyces                 | -0.087066313 | 0.260334604 | 0.878368327 |
| g Anaerosporobacter | g Aspergillus                  | -0.072096939 | 0.351586182 | 0.900151743 |
| g Anaerosporobacter | g Kazachstania                 | 0.14088741   | 0.067689668 | 0.836350979 |
| g Anaerosporobacter | g Malassezia                   | 0.046576348  | 0.547623419 | 0.942564508 |
| g Anaerosporobacter | g unclassified Fungi           | -0.158597862 | 0.039444069 | 0.808354944 |
| g Anaerosporobacter | g Fusarium                     | 0.00383443   | 0.960538515 | 0.997964903 |
| g Anaerosporobacter | g Mycosphaerella               | 0.027908013  | 0.718711257 | 0.970778853 |
| g Anaerosporobacter | g Simplicillium                | -0.057785745 | 0.455508415 | 0.924332119 |
| g Anaerosporobacter | g unclassified Cordycipitaceae | 0.014804763  | 0.848491135 | 0.994526835 |
| g Anaerosporobacter | g unidentified                 | -0.005449946 | 0.943935782 | 0.996925697 |
| g MGYG-HGUT-03214   | g Verticillium                 | 0.101838009  | 0.187672247 | 0.873641816 |
| g MGYG-HGUT-03214   | g unclassified Tremellomycetes | 0.029537743  | 0.703037055 | 0.967508066 |
| g MGYG-HGUT-03214   | g Candida                      | -0.182192572 | 0.017749488 | 0.702895198 |
| g MGYG-HGUT-03214   | g Cladosporium                 | 0.043940102  | 0.570540304 | 0.942564508 |
| g MGYG-HGUT-03214   | g Debaryomyces                 | -0.152284709 | 0.048092298 | 0.832568254 |
| g MGYG-HGUT-03214   | g Aspergillus                  | -0.05687629  | 0.462644639 | 0.927602832 |
| g MGYG-HGUT-03214   | g Kazachstania                 | 0.099943253  | 0.196059822 | 0.874689648 |
| g MGYG-HGUT-03214   | g Malassezia                   | 0.029875185  | 0.699806965 | 0.967505184 |
| g MGYG-HGUT-03214   | g unclassified Fungi           | -0.018682913 | 0.809480453 | 0.989767396 |
| g MGYG-HGUT-03214   | g Fusarium                     | -0.080498276 | 0.298153937 | 0.892181547 |
| g MGYG-HGUT-03214   | g Mycosphaerella               | -0.034005321 | 0.660722961 | 0.958497637 |
| g MGYG-HGUT-03214   | g Simplicillium                | 0.045768912  | 0.554594314 | 0.942564508 |
| g MGYG-HGUT-03214   | g unclassified Cordycipitaceae | 0.090691869  | 0.240931224 | 0.874689648 |
| g MGYG-HGUT-03214   | g unidentified                 | 0.05059826   | 0.513553752 | 0.938277062 |
| g MGYG-HGUT-04285   | g Verticillium                 | 0.308012798  | 4.62E-05    | 0.392677477 |
| g MGYG-HGUT-04285   | g unclassified Tremellomycetes | 0.176092539  | 0.022013272 | 0.752201643 |
| g MGYG-HGUT-04285   | g Candida                      | -0.110000529 | 0.154528138 | 0.850069503 |
| g MGYG-HGUT-04285   | g Cladosporium                 | 0.196659224  | 0.010387032 | 0.613926619 |
| g MGYG-HGUT-04285   | g Debaryomyces                 | -0.103082826 | 0.182306528 | 0.872371283 |
| g MGYG-HGUT-04285   | g Aspergillus                  | -0.069745943 | 0.367553293 | 0.901117392 |
| g MGYG-HGUT-04285   | g Kazachstania                 | -0.05807048  | 0.453286864 | 0.923868417 |
| g MGYG-HGUT-04285   | g Malassezia                   | 0.179316009  | 0.019661401 | 0.703085607 |
| g MGYG-HGUT-04285   | g unclassified Fungi           | -0.125265673 | 0.104639387 | 0.841929371 |
| g MGYG-HGUT-04285   | g Fusarium                     | -0.059769557 | 0.440157093 | 0.919791111 |
| g MGYG-HGUT-04285   | g Mycosphaerella               | -0.019307553 | 0.803238127 | 0.988396129 |
| g MGYG-HGUT-04285   | g Simplicillium                | 0.281718982  | 0.000206762 | 0.392677477 |
| g MGYG-HGUT-04285   | g unclassified Cordycipitaceae | 0.281186972  | 0.00021281  | 0.392677477 |
| g MGYG-HGUT-04285   | g unidentified                 | -0.04610443  | 0.551692441 | 0.942564508 |
| g Anaerotignum      | g Verticillium                 | 0.212760472  | 0.005482457 | 0.613926619 |
| g Anaerotignum      | g unclassified Tremellomycetes | -0.052733131 | 0.495924112 | 0.93470804  |
| g Anaerotignum      | g Candida                      | -0.196594505 | 0.010412793 | 0.613926619 |
| g Anaerotignum      | g Cladosporium                 | -0.037940223 | 0.624318807 | 0.952309753 |
| g Anaerotignum      | g Debaryomyces                 | -0.12991927  | 0.09226701  | 0.8415005   |
| g Anaerotignum      | g Aspergillus                  | 0.015313984  | 0.843345633 | 0.994526835 |
| g Anaerotignum      | g Kazachstania                 | -0.048929702 | 0.527554292 | 0.940363396 |
| g Anaerotignum      | g Malassezia                   | 0.111547266  | 0.148777763 | 0.849249996 |
| g Anaerotignum      | g unclassified Fungi           | 0.113333299  | 0.142340859 | 0.849249996 |
| g Anaerotignum      | g Fusarium                     | -0.16667638  | 0.030319942 | 0.785763434 |
| g Anaerotignum      | g Mycosphaerella               | -0.026671983 | 0.730678096 | 0.973690981 |
| g Anaerotignum      | g Simplicillium                | 0.062471011  | 0.419733156 | 0.916661525 |
| g Anaerotignum      | g unclassified Cordycipitaceae | 0.102460546  | 0.184974569 | 0.873641816 |
| g Anaerotignum      | g unidentified                 | 0.102006501  | 0.186939288 | 0.873641816 |
| g MGYG-HGUT-01118   | g Verticillium                 | -0.003327664 | 0.965750408 | 0.998625698 |
| g MGYG-HGUT-01118   | g unclassified Tremellomycetes | -0.037277806 | 0.630387064 | 0.953903732 |
| g MGYG-HGUT-01118   | g Candida                      | -0.047711748 | 0.537894308 | 0.941323418 |
| g MGYG-HGUT-01118   | g Cladosporium                 | -0.02868699  | 0.711204202 | 0.968802592 |
| g MGYG-HGUT-01118   | g Debaryomyces                 | -0.071678291 | 0.354397162 | 0.900151743 |
| g MGYG-HGUT-01118   | g Aspergillus                  | 0.01628888   | 0.8335133   | 0.994526835 |
| g MGYG-HGUT-01118   | g Kazachstania                 | 0.000422914  | 0.995645902 | 0.999049974 |
| g MGYG-HGUT-01118   | g Malassezia                   | -0.097087751 | 0.209209429 | 0.874689648 |
| g MGYG-HGUT-01118   | g unclassified Fungi           | 0.014294617  | 0.853652399 | 0.994526835 |
| g MGYG-HGUT-01118   | g Fusarium                     | -0.067060152 | 0.38633251  | 0.906174944 |
| g MGYG-HGUT-01118   | g Mycosphaerella               | -0.03713614  | 0.631688071 | 0.954051837 |
| g MGYG-HGUT-01118   | g Simplicillium                | -0.018008955 | 0.816229125 | 0.991841934 |
| g MGYG-HGUT-01118   | g unclassified Cordycipitaceae | 0.045025052  | 0.561054152 | 0.942564508 |
| g MGYG-HGUT-01118   | g unidentified                 | 0.095383432  | 0.217353321 | 0.874689648 |
| g CAG-274           | g Verticillium                 | 0.011179547  | 0.885295171 | 0.994526835 |
| g CAG-274           | g unclassified Tremellomycetes | 0.202277631  | 0.008354081 | 0.613926619 |
| g CAG-274           | g Candida                      | -0.058914567 | 0.446736906 | 0.921010267 |
| g CAG-274           | g Cladosporium                 | 0.107059969  | 0.165919377 | 0.864354699 |
| g CAG-274           | g Debaryomyces                 | -0.119168316 | 0.122783525 | 0.849176369 |
| g CAG-274           | g Aspergillus                  | -0.092929879 | 0.229470227 | 0.874689648 |
| g CAG-274           | g Kazachstania                 | 0.092354823  | 0.232377749 | 0.874689648 |
| g CAG-274           | g Malassezia                   | -0.061779723 | 0.424906288 | 0.918239588 |
| g CAG-274           | g unclassified Fungi           | -0.186273153 | 0.015315117 | 0.702895198 |
| g CAG-274           | g Fusarium                     | -0.044742368 | 0.563518467 | 0.942564508 |
| g CAG-274           | g Mycosphaerella               | 0.016214216  | 0.83426544  | 0.994526835 |

|                    |                                       |              |             |             |
|--------------------|---------------------------------------|--------------|-------------|-------------|
| g CAG-274          | g <i>Simplicillium</i>                | 0.047544979  | 0.539317919 | 0.941536464 |
| g CAG-274          | g unclassified <i>Cordycipitaceae</i> | 0.081274145  | 0.293506107 | 0.892181547 |
| g CAG-274          | g unidentified                        | -0.102259174 | 0.185844061 | 0.873641816 |
| g MGYG-HGUT-01660  | g <i>Verticillium</i>                 | 0.114006421  | 0.139970675 | 0.849249996 |
| g MGYG-HGUT-01660  | g unclassified <i>Tremellomycetes</i> | 0.155979001  | 0.042858146 | 0.812441332 |
| g MGYG-HGUT-01660  | g <i>Candida</i>                      | 0.007669971  | 0.921161255 | 0.996251765 |
| g MGYG-HGUT-01660  | g <i>Cladosporium</i>                 | 0.083089828  | 0.282818465 | 0.8902203   |
| g MGYG-HGUT-01660  | g <i>Debaryomyces</i>                 | -0.044145688 | 0.568736981 | 0.942564508 |
| g MGYG-HGUT-01660  | g <i>Aspergillus</i>                  | -0.001830329 | 0.981157548 | 0.998625698 |
| g MGYG-HGUT-01660  | g <i>Kazachstania</i>                 | -0.011103967 | 0.88606538  | 0.994526835 |
| g MGYG-HGUT-01660  | g <i>Malassezia</i>                   | 0.036224531  | 0.640086845 | 0.955341199 |
| g MGYG-HGUT-01660  | g unclassified <i>Fungi</i>           | -0.161757142 | 0.035632776 | 0.808354944 |
| g MGYG-HGUT-01660  | g <i>Fusarium</i>                     | -0.055270499 | 0.475394359 | 0.93028395  |
| g MGYG-HGUT-01660  | g <i>Mycosphaerella</i>               | -0.060013245 | 0.438291862 | 0.919726905 |
| g MGYG-HGUT-01660  | g <i>Simplicillium</i>                | 0.124783838  | 0.105991679 | 0.841929371 |
| g MGYG-HGUT-01660  | g unclassified <i>Cordycipitaceae</i> | 0.215360239  | 0.004923783 | 0.613926619 |
| g MGYG-HGUT-01660  | g unidentified                        | -0.141058021 | 0.067354364 | 0.836350979 |
| g MGYG-HGUT-04547  | g <i>Verticillium</i>                 | -0.108543874 | 0.160095119 | 0.859887758 |
| g MGYG-HGUT-04547  | g unclassified <i>Tremellomycetes</i> | 0.050557278  | 0.513895314 | 0.938277062 |
| g MGYG-HGUT-04547  | g <i>Candida</i>                      | -0.061968288 | 0.423491548 | 0.918013177 |
| g MGYG-HGUT-04547  | g <i>Cladosporium</i>                 | 0.002856651  | 0.970595895 | 0.998625698 |
| g MGYG-HGUT-04547  | g <i>Debaryomyces</i>                 | -0.056156363 | 0.468337243 | 0.928769554 |
| g MGYG-HGUT-04547  | g <i>Aspergillus</i>                  | 0.141082691  | 0.067305992 | 0.836350979 |
| g MGYG-HGUT-04547  | g <i>Kazachstania</i>                 | 0.087230421  | 0.25943382  | 0.878368327 |
| g MGYG-HGUT-04547  | g <i>Malassezia</i>                   | -0.076575003 | 0.322398683 | 0.89909104  |
| g MGYG-HGUT-04547  | g unclassified <i>Fungi</i>           | -0.135820833 | 0.078283293 | 0.8415005   |
| g MGYG-HGUT-04547  | g <i>Fusarium</i>                     | -0.099691321 | 0.197195242 | 0.874689648 |
| g MGYG-HGUT-04547  | g <i>Mycosphaerella</i>               | 0.000564588  | 0.994187323 | 0.999049974 |
| g MGYG-HGUT-04547  | g <i>Simplicillium</i>                | -0.007424435 | 0.923677318 | 0.996251765 |
| g MGYG-HGUT-04547  | g unclassified <i>Cordycipitaceae</i> | -0.047282307 | 0.541564002 | 0.94160936  |
| g MGYG-HGUT-04547  | g unidentified                        | -0.093557179 | 0.226327914 | 0.874689648 |
| g MGYG-HGUT-01183  | g <i>Verticillium</i>                 | 0.01941882   | 0.80212747  | 0.988396129 |
| g MGYG-HGUT-01183  | g unclassified <i>Tremellomycetes</i> | -0.100065073 | 0.195512505 | 0.874689648 |
| g MGYG-HGUT-01183  | g <i>Candida</i>                      | -0.032725457 | 0.672742805 | 0.961537587 |
| g MGYG-HGUT-01183  | g <i>Cladosporium</i>                 | -0.032578019 | 0.674132879 | 0.961701261 |
| g MGYG-HGUT-01183  | g <i>Debaryomyces</i>                 | -0.11957668  | 0.121496865 | 0.849176369 |
| g MGYG-HGUT-01183  | g <i>Aspergillus</i>                  | -0.060339553 | 0.435801313 | 0.919176572 |
| g MGYG-HGUT-01183  | g <i>Kazachstania</i>                 | 0.183858369  | 0.016717855 | 0.702895198 |
| g MGYG-HGUT-01183  | g <i>Malassezia</i>                   | 0.048965872  | 0.527248767 | 0.940363396 |
| g MGYG-HGUT-01183  | g unclassified <i>Fungi</i>           | -0.003823685 | 0.960649012 | 0.997967321 |
| g MGYG-HGUT-01183  | g <i>Fusarium</i>                     | -0.083374755 | 0.281165338 | 0.8902203   |
| g MGYG-HGUT-01183  | g <i>Mycosphaerella</i>               | -0.086953052 | 0.260957543 | 0.878368327 |
| g MGYG-HGUT-01183  | g <i>Simplicillium</i>                | -0.07255801  | 0.348506604 | 0.900151743 |
| g MGYG-HGUT-01183  | g unclassified <i>Cordycipitaceae</i> | -0.017336066 | 0.822980594 | 0.992484281 |
| g MGYG-HGUT-01183  | g unidentified                        | 0.060508735  | 0.434513217 | 0.918864392 |
| g UBA1390          | g <i>Verticillium</i>                 | 0.148935856  | 0.053286844 | 0.832568254 |
| g UBA1390          | g unclassified <i>Tremellomycetes</i> | -0.031310593 | 0.686127503 | 0.963892039 |
| g UBA1390          | g <i>Candida</i>                      | -0.006760957 | 0.930479854 | 0.996251765 |
| g UBA1390          | g <i>Cladosporium</i>                 | 0.021389152  | 0.782527422 | 0.986171666 |
| g UBA1390          | g <i>Debaryomyces</i>                 | -0.080554428 | 0.297815932 | 0.892181547 |
| g UBA1390          | g <i>Aspergillus</i>                  | -0.153109389 | 0.046879924 | 0.828771778 |
| g UBA1390          | g <i>Kazachstania</i>                 | -0.076521305 | 0.322739123 | 0.89909104  |
| g UBA1390          | g <i>Malassezia</i>                   | 0.083605217  | 0.279832977 | 0.889387397 |
| g UBA1390          | g unclassified <i>Fungi</i>           | -0.021333004 | 0.783084138 | 0.986399684 |
| g UBA1390          | g <i>Fusarium</i>                     | -0.043243063 | 0.576674468 | 0.943618965 |
| g UBA1390          | g <i>Mycosphaerella</i>               | -0.013869953 | 0.857953574 | 0.994526835 |
| g UBA1390          | g <i>Simplicillium</i>                | -0.003755921 | 0.961345846 | 0.998221928 |
| g UBA1390          | g unclassified <i>Cordycipitaceae</i> | 0.098376008  | 0.203200675 | 0.874689648 |
| g UBA1390          | g unidentified                        | 0.005080765  | 0.94772801  | 0.996925697 |
| g Cellulosilyticum | g <i>Verticillium</i>                 | -0.04881707  | 0.528506269 | 0.940363396 |
| g Cellulosilyticum | g unclassified <i>Tremellomycetes</i> | 0.016721717  | 0.829156076 | 0.993650851 |
| g Cellulosilyticum | g <i>Candida</i>                      | 0.037846605  | 0.625174899 | 0.952422937 |
| g Cellulosilyticum | g <i>Cladosporium</i>                 | 0.015363504  | 0.842845603 | 0.994526835 |
| g Cellulosilyticum | g <i>Debaryomyces</i>                 | -0.04454761  | 0.565219286 | 0.942564508 |
| g Cellulosilyticum | g <i>Aspergillus</i>                  | 0.026402816  | 0.73329284  | 0.973693103 |
| g Cellulosilyticum | g <i>Kazachstania</i>                 | 0.041629832  | 0.590988363 | 0.947252808 |
| g Cellulosilyticum | g <i>Malassezia</i>                   | -0.050595529 | 0.51357651  | 0.938277062 |
| g Cellulosilyticum | g unclassified <i>Fungi</i>           | -0.064717817 | 0.40317499  | 0.912136453 |
| g Cellulosilyticum | g <i>Fusarium</i>                     | -0.102255191 | 0.185861287 | 0.873641816 |
| g Cellulosilyticum | g <i>Mycosphaerella</i>               | -0.127025887 | 0.099814345 | 0.8415005   |
| g Cellulosilyticum | g <i>Simplicillium</i>                | -0.093551376 | 0.226356845 | 0.874689648 |
| g Cellulosilyticum | g unclassified <i>Cordycipitaceae</i> | -0.001467184 | 0.984895477 | 0.999049974 |
| g Cellulosilyticum | g unidentified                        | -0.179558009 | 0.019493958 | 0.702895198 |
| g Niameybacter     | g <i>Verticillium</i>                 | -0.004889907 | 0.949688964 | 0.99717368  |
| g Niameybacter     | g unclassified <i>Tremellomycetes</i> | 0.1066882    | 0.167402993 | 0.864987015 |
| g Niameybacter     | g <i>Candida</i>                      | -0.007954041 | 0.918251289 | 0.996251765 |
| g Niameybacter     | g <i>Cladosporium</i>                 | -0.058617806 | 0.449033608 | 0.922032734 |
| g Niameybacter     | g <i>Debaryomyces</i>                 | 0.088789405  | 0.250983235 | 0.874689648 |

|                   |                                |              |             |             |
|-------------------|--------------------------------|--------------|-------------|-------------|
| g Niameybacter    | g Aspergillus                  | 0.001389744  | 0.985692624 | 0.999049974 |
| g Niameybacter    | g Kazachstania                 | -0.046195088 | 0.550909619 | 0.942564508 |
| g Niameybacter    | g Malassezia                   | 0.064718621  | 0.403169131 | 0.912136453 |
| g Niameybacter    | g unclassified_Fungi           | -0.110066027 | 0.154281288 | 0.850069503 |
| g Niameybacter    | g Fusarium                     | 0.047407976  | 0.540488884 | 0.94160936  |
| g Niameybacter    | g Mycosphaerella               | -0.062445042 | 0.419926824 | 0.916661525 |
| g Niameybacter    | g Simplicillium                | -0.1112262   | 0.149957887 | 0.849249996 |
| g Niameybacter    | g unclassified_Cordycipitaceae | -0.019800347 | 0.798322139 | 0.987463135 |
| g Niameybacter    | g unidentified                 | -0.098792967 | 0.201282814 | 0.874689648 |
| g MGYG-HGUT-04642 | g Verticillium                 | 0.041374639  | 0.593267391 | 0.947273049 |
| g MGYG-HGUT-04642 | g unclassified_Tremellomycetes | 0.027033496  | 0.727171169 | 0.972650982 |
| g MGYG-HGUT-04642 | g Candida                      | -0.046603014 | 0.547393933 | 0.942564508 |
| g MGYG-HGUT-04642 | g Cladosporium                 | 0.033222931  | 0.668060712 | 0.960389755 |
| g MGYG-HGUT-04642 | g Debaryomyces                 | -0.085411807 | 0.269536004 | 0.880885289 |
| g MGYG-HGUT-04642 | g Aspergillus                  | -0.005784205 | 0.94050337  | 0.996925697 |
| g MGYG-HGUT-04642 | g Kazachstania                 | 0.055961286  | 0.469886346 | 0.928769554 |
| g MGYG-HGUT-04642 | g Malassezia                   | 0.002620145  | 0.973029341 | 0.998625698 |
| g MGYG-HGUT-04642 | g unclassified_Fungi           | -0.133227996 | 0.084200674 | 0.8415005   |
| g MGYG-HGUT-04642 | g Fusarium                     | -0.091187625 | 0.238358606 | 0.874689648 |
| g MGYG-HGUT-04642 | g Mycosphaerella               | 0.057788175  | 0.455489427 | 0.924332119 |
| g MGYG-HGUT-04642 | g Simplicillium                | 0.031093171  | 0.68819313  | 0.96434561  |
| g MGYG-HGUT-04642 | g unclassified_Cordycipitaceae | 0.122554021  | 0.112429418 | 0.843328451 |
| g MGYG-HGUT-04642 | g unidentified                 | 0.001016353  | 0.989536418 | 0.999049974 |
| g MGYG-HGUT-04273 | g Verticillium                 | 0.237972824  | 0.001835899 | 0.550026842 |
| g MGYG-HGUT-04273 | g unclassified_Tremellomycetes | 0.05897937   | 0.44623626  | 0.921010267 |
| g MGYG-HGUT-04273 | g Candida                      | -0.080143699 | 0.300294159 | 0.893624742 |
| g MGYG-HGUT-04273 | g Cladosporium                 | 0.09127834   | 0.237889951 | 0.874689648 |
| g MGYG-HGUT-04273 | g Debaryomyces                 | -0.095432904 | 0.217113784 | 0.874689648 |
| g MGYG-HGUT-04273 | g Aspergillus                  | -0.044351765 | 0.566932067 | 0.942564508 |
| g MGYG-HGUT-04273 | g Kazachstania                 | -0.039338279 | 0.611594456 | 0.951172976 |
| g MGYG-HGUT-04273 | g Malassezia                   | 0.09347396   | 0.22674302  | 0.874689648 |
| g MGYG-HGUT-04273 | g unclassified_Fungi           | -0.134079667 | 0.082218654 | 0.8415005   |
| g MGYG-HGUT-04273 | g Fusarium                     | -0.012355967 | 0.873321029 | 0.994526835 |
| g MGYG-HGUT-04273 | g Mycosphaerella               | 0.071000123  | 0.358980416 | 0.900151743 |
| g MGYG-HGUT-04273 | g Simplicillium                | 0.140800163  | 0.067861661 | 0.836350979 |
| g MGYG-HGUT-04273 | g unclassified_Cordycipitaceae | 0.222847736  | 0.003588558 | 0.580842757 |
| g MGYG-HGUT-04273 | g unidentified                 | -0.073145784 | 0.344605466 | 0.900151743 |
| g MGYG-HGUT-00420 | g Verticillium                 | -0.126753017 | 0.100550594 | 0.8415005   |
| g MGYG-HGUT-00420 | g unclassified_Tremellomycetes | -0.126891823 | 0.100175538 | 0.8415005   |
| g MGYG-HGUT-00420 | g Candida                      | -0.076395417 | 0.323538154 | 0.899370541 |
| g MGYG-HGUT-00420 | g Cladosporium                 | -0.158792322 | 0.039199955 | 0.808354944 |
| g MGYG-HGUT-00420 | g Debaryomyces                 | -0.08778855  | 0.25638628  | 0.87575706  |
| g MGYG-HGUT-00420 | g Aspergillus                  | 0.060053328  | 0.437985489 | 0.919726905 |
| g MGYG-HGUT-00420 | g Kazachstania                 | 0.072144851  | 0.351265374 | 0.900151743 |
| g MGYG-HGUT-00420 | g Malassezia                   | -0.044897352 | 0.56216675  | 0.942564508 |
| g MGYG-HGUT-00420 | g unclassified_Fungi           | -0.002319042 | 0.976127795 | 0.998625698 |
| g MGYG-HGUT-00420 | g Fusarium                     | -0.041244826 | 0.594428228 | 0.947273049 |
| g MGYG-HGUT-00420 | g Mycosphaerella               | -0.046142036 | 0.551367653 | 0.942564508 |
| g MGYG-HGUT-00420 | g Simplicillium                | 0.033138181  | 0.66885746  | 0.960428856 |
| g MGYG-HGUT-00420 | g unclassified_Cordycipitaceae | -0.072055785 | 0.351861886 | 0.900151743 |
| g MGYG-HGUT-00420 | g unidentified                 | 0.18253721   | 0.017531629 | 0.702895198 |
| g CAG-145         | g Verticillium                 | 0.010530341  | 0.891914403 | 0.994653074 |
| g CAG-145         | g unclassified_Tremellomycetes | -0.000439496 | 0.995475184 | 0.999049974 |
| g CAG-145         | g Candida                      | -0.085991252 | 0.26628863  | 0.878368327 |
| g CAG-145         | g Cladosporium                 | -0.023378102 | 0.76288002  | 0.982076388 |
| g CAG-145         | g Debaryomyces                 | -0.15267898  | 0.047509455 | 0.832568254 |
| g CAG-145         | g Aspergillus                  | 0.035344537  | 0.648237943 | 0.955501166 |
| g CAG-145         | g Kazachstania                 | -0.088150934 | 0.254420803 | 0.874689648 |
| g CAG-145         | g Malassezia                   | 0.071572525  | 0.355109538 | 0.900151743 |
| g CAG-145         | g unclassified_Fungi           | -0.11282732  | 0.144142517 | 0.849249996 |
| g CAG-145         | g Fusarium                     | -0.008863013 | 0.908947435 | 0.996251765 |
| g CAG-145         | g Mycosphaerella               | -0.079100892 | 0.306647199 | 0.897967316 |
| g CAG-145         | g Simplicillium                | 0.128672512  | 0.095461502 | 0.8415005   |
| g CAG-145         | g unclassified_Cordycipitaceae | 0.009396805  | 0.903489454 | 0.995280411 |
| g CAG-145         | g unidentified                 | 0.038091325  | 0.622938098 | 0.952309753 |
| g UBA1191         | g Verticillium                 | 0.002048037  | 0.978916831 | 0.998625698 |
| g UBA1191         | g unclassified_Tremellomycetes | 0.040209359  | 0.603724373 | 0.950399198 |
| g UBA1191         | g Candida                      | -0.012019232 | 0.876745662 | 0.994526835 |
| g UBA1191         | g Cladosporium                 | 0.02642809   | 0.733047188 | 0.973693103 |
| g UBA1191         | g Debaryomyces                 | -0.032339096 | 0.676387837 | 0.96286903  |
| g UBA1191         | g Aspergillus                  | 0.00011598   | 0.998805926 | 0.99956432  |
| g UBA1191         | g Kazachstania                 | -0.035107796 | 0.650437996 | 0.955597379 |
| g UBA1191         | g Malassezia                   | -0.048449013 | 0.531623149 | 0.940412658 |
| g UBA1191         | g unclassified_Fungi           | -0.227277824 | 0.002961819 | 0.550026842 |
| g UBA1191         | g Fusarium                     | -0.074773781 | 0.333945025 | 0.900151743 |
| g UBA1191         | g Mycosphaerella               | -0.006214997 | 0.936081302 | 0.996251765 |
| g UBA1191         | g Simplicillium                | 0.01123327   | 0.884747767 | 0.994526835 |
| g UBA1191         | g unclassified_Cordycipitaceae | 0.040985249  | 0.596752551 | 0.947940605 |



|                   |                                |              |             |             |
|-------------------|--------------------------------|--------------|-------------|-------------|
| g UBA1191         | g unidentified                 | -0.086947999 | 0.260985359 | 0.878368327 |
| g Emergencia      | g Verticillium                 | 0.119164218  | 0.122796492 | 0.849176369 |
| g Emergencia      | g unclassified Tremellomycetes | 0.060803336  | 0.432275436 | 0.918239588 |
| g Emergencia      | g Candida                      | -0.115055797 | 0.136335819 | 0.849249996 |
| g Emergencia      | g Cladosporium                 | 0.03698435   | 0.633083307 | 0.954116909 |
| g Emergencia      | g Debaromyces                  | -0.103030078 | 0.182531584 | 0.872371283 |
| g Emergencia      | g Aspergillus                  | -0.039851831 | 0.606949132 | 0.950933357 |
| g Emergencia      | g Kazachstania                 | 0.047339961  | 0.541070613 | 0.94160936  |
| g Emergencia      | g Malassezia                   | 0.102224457  | 0.185994264 | 0.873641816 |
| g Emergencia      | g unclassified Fungi           | -0.096289814 | 0.212994585 | 0.874689648 |
| g Emergencia      | g Fusarium                     | -0.021911794 | 0.777350725 | 0.984601564 |
| g Emergencia      | g Mycosphaerella               | 0.049568657  | 0.522170246 | 0.939740222 |
| g Emergencia      | g Simplicillium                | 0.192046227  | 0.012370318 | 0.659702633 |
| g Emergencia      | g unclassified Cordycipitaceae | 0.149567167  | 0.052273547 | 0.832568254 |
| g Emergencia      | g unidentified                 | 0.02899157   | 0.708276429 | 0.968657831 |
| g Mogibacterium   | g Verticillium                 | 0.055822789  | 0.470987848 | 0.928769554 |
| g Mogibacterium   | g unclassified Tremellomycetes | -0.005722292 | 0.941139053 | 0.996925697 |
| g Mogibacterium   | g Candida                      | -0.131845533 | 0.087499369 | 0.8415005   |
| g Mogibacterium   | g Cladosporium                 | 0.02087003   | 0.787678723 | 0.986710331 |
| g Mogibacterium   | g Debaromyces                  | -0.158989526 | 0.038953696 | 0.808354944 |
| g Mogibacterium   | g Aspergillus                  | -0.009277324 | 0.904710749 | 0.995453822 |
| g Mogibacterium   | g Kazachstania                 | -0.029459093 | 0.703790677 | 0.967508066 |
| g Mogibacterium   | g Malassezia                   | 0.050768929  | 0.512132587 | 0.938277062 |
| g Mogibacterium   | g unclassified Fungi           | -0.062590791 | 0.418840541 | 0.916661525 |
| g Mogibacterium   | g Fusarium                     | 0.006281629  | 0.935397492 | 0.996251765 |
| g Mogibacterium   | g Mycosphaerella               | 0.035567115  | 0.646172273 | 0.955501166 |
| g Mogibacterium   | g Simplicillium                | 0.064179229  | 0.407108439 | 0.913116876 |
| g Mogibacterium   | g unclassified Cordycipitaceae | 0.070087448  | 0.365206527 | 0.901117392 |
| g Mogibacterium   | g unidentified                 | 0.061379484  | 0.4279182   | 0.918239588 |
| g S5-A14a         | g Verticillium                 | 0.02029537   | 0.793391877 | 0.986710331 |
| g S5-A14a         | g unclassified Tremellomycetes | 0.075194548  | 0.331224414 | 0.900151743 |
| g S5-A14a         | g Candida                      | 0.022543399  | 0.771107828 | 0.98426132  |
| g S5-A14a         | g Cladosporium                 | 0.014715404  | 0.849394745 | 0.994526835 |
| g S5-A14a         | g Debaromyces                  | -0.01940014  | 0.802313908 | 0.988396129 |
| g S5-A14a         | g Aspergillus                  | 0.067323314  | 0.384467227 | 0.906174944 |
| g S5-A14a         | g Kazachstania                 | -0.158752014 | 0.039250451 | 0.808354944 |
| g S5-A14a         | g Malassezia                   | -0.053317385 | 0.491155774 | 0.932872225 |
| g S5-A14a         | g unclassified Fungi           | -0.182848159 | 0.017337064 | 0.702895198 |
| g S5-A14a         | g Fusarium                     | -0.127682452 | 0.098060283 | 0.8415005   |
| g S5-A14a         | g Mycosphaerella               | -0.084495175 | 0.274727856 | 0.886857663 |
| g S5-A14a         | g Simplicillium                | 0.009400037  | 0.903456419 | 0.995280411 |
| g S5-A14a         | g unclassified Cordycipitaceae | 0.010246941  | 0.894806291 | 0.995135868 |
| g S5-A14a         | g unidentified                 | -0.121878803 | 0.114437957 | 0.843228451 |
| g MGYG-HGUT-04123 | g Verticillium                 | 0.07713008   | 0.31889314  | 0.898536448 |
| g MGYG-HGUT-04123 | g unclassified Tremellomycetes | 0.090239022  | 0.243298051 | 0.874689648 |
| g MGYG-HGUT-04123 | g Candida                      | -0.080631197 | 0.297354237 | 0.892181547 |
| g MGYG-HGUT-04123 | g Cladosporium                 | 0.116770059  | 0.130553825 | 0.849249996 |
| g MGYG-HGUT-04123 | g Debaromyces                  | -0.181526827 | 0.018176996 | 0.702895198 |
| g MGYG-HGUT-04123 | g Aspergillus                  | 0.008249297  | 0.915227898 | 0.996251765 |
| g MGYG-HGUT-04123 | g Kazachstania                 | 0.010282809  | 0.894440207 | 0.995135868 |
| g MGYG-HGUT-04123 | g Malassezia                   | 0.002809018  | 0.971085982 | 0.998625698 |
| g MGYG-HGUT-04123 | g unclassified Fungi           | -0.016720017 | 0.829173184 | 0.993650851 |
| g MGYG-HGUT-04123 | g Fusarium                     | -0.223397908 | 0.003504708 | 0.580842757 |
| g MGYG-HGUT-04123 | g Mycosphaerella               | 0.009796093  | 0.899409694 | 0.995280411 |
| g MGYG-HGUT-04123 | g Simplicillium                | -0.071628989 | 0.35472912  | 0.900151743 |
| g MGYG-HGUT-04123 | g unclassified Cordycipitaceae | 0.069924003  | 0.366328535 | 0.901117392 |
| g MGYG-HGUT-04123 | g unidentified                 | -0.066769499 | 0.388398999 | 0.907127903 |
| g MGYG-HGUT-01191 | g Verticillium                 | 0.08918742   | 0.248856622 | 0.874689648 |
| g MGYG-HGUT-01191 | g unclassified Tremellomycetes | -0.158945913 | 0.039008046 | 0.808354944 |
| g MGYG-HGUT-01191 | g Candida                      | -0.150614132 | 0.050628321 | 0.832568254 |
| g MGYG-HGUT-01191 | g Cladosporium                 | -0.006015022 | 0.938133801 | 0.996251765 |
| g MGYG-HGUT-01191 | g Debaromyces                  | -0.005074145 | 0.947796016 | 0.996925697 |
| g MGYG-HGUT-01191 | g Aspergillus                  | -0.009366662 | 0.903797542 | 0.995280411 |
| g MGYG-HGUT-01191 | g Kazachstania                 | -0.045293718 | 0.558716841 | 0.942564508 |
| g MGYG-HGUT-01191 | g Malassezia                   | 0.085017511  | 0.27176108  | 0.883774313 |
| g MGYG-HGUT-01191 | g unclassified Fungi           | 0.061157967  | 0.429590463 | 0.918239588 |
| g MGYG-HGUT-01191 | g Fusarium                     | -0.088284025 | 0.253701567 | 0.874689648 |
| g MGYG-HGUT-01191 | g Mycosphaerella               | -0.051208742 | 0.508479634 | 0.936621389 |
| g MGYG-HGUT-01191 | g Simplicillium                | 0.161997587  | 0.03535914  | 0.808354944 |
| g MGYG-HGUT-01191 | g unclassified Cordycipitaceae | -0.000504817 | 0.994802687 | 0.999049974 |
| g MGYG-HGUT-01191 | g unidentified                 | 0.122588867  | 0.112326517 | 0.843328451 |
| g MGYG-HGUT-00126 | g Verticillium                 | 0.087152655  | 0.259860411 | 0.878368327 |
| g MGYG-HGUT-00126 | g unclassified Tremellomycetes | 0.046333831  | 0.549712633 | 0.942564508 |
| g MGYG-HGUT-00126 | g Candida                      | -0.166210158 | 0.030792704 | 0.793142358 |
| g MGYG-HGUT-00126 | g Cladosporium                 | -0.01480669  | 0.848471646 | 0.994526835 |
| g MGYG-HGUT-00126 | g Debaromyces                  | -0.151274244 | 0.049613273 | 0.832568254 |
| g MGYG-HGUT-00126 | g Aspergillus                  | 0.020725635  | 0.789113215 | 0.986710331 |
| g MGYG-HGUT-00126 | g Kazachstania                 | -0.057438402 | 0.458226638 | 0.925481385 |

|                    |                                |              |             |             |
|--------------------|--------------------------------|--------------|-------------|-------------|
| g MGYG-HGUT-00126  | g Malassezia                   | 0.049306132  | 0.524378981 | 0.939740222 |
| g MGYG-HGUT-00126  | g unclassified Fungi           | -0.104782721 | 0.175162507 | 0.871655497 |
| g MGYG-HGUT-00126  | g Fusarium                     | -0.058256188 | 0.451841215 | 0.923868417 |
| g MGYG-HGUT-00126  | g Mycosphaerella               | -0.10954923  | 0.156237084 | 0.852150641 |
| g MGYG-HGUT-00126  | g Simplicillium                | 0.126028522  | 0.102526226 | 0.841929371 |
| g MGYG-HGUT-00126  | g unclassified Cordycipitaceae | 0.089547528  | 0.246943333 | 0.874689648 |
| g MGYG-HGUT-00126  | g unidentified                 | 0.073987284  | 0.339068572 | 0.900151743 |
| g MGYG-HGUT-00367  | g Verticillium                 | -0.052397993 | 0.498670317 | 0.936237403 |
| g MGYG-HGUT-00367  | g unclassified Tremellomycetes | 0.011788179  | 0.879096824 | 0.994526835 |
| g MGYG-HGUT-00367  | g Candida                      | 0.023010383  | 0.766501474 | 0.982494893 |
| g MGYG-HGUT-00367  | g Cladosporium                 | 0.082372732  | 0.28700785  | 0.891214772 |
| g MGYG-HGUT-00367  | g Debaromyces                  | -0.08484928  | 0.272714221 | 0.88516315  |
| g MGYG-HGUT-00367  | g Aspergillus                  | 0.038127601  | 0.622606822 | 0.952309753 |
| g MGYG-HGUT-00367  | g Kazachstania                 | 0.004573711  | 0.952938354 | 0.99717368  |
| g MGYG-HGUT-00367  | g Malassezia                   | 0.008749889  | 0.910104677 | 0.996251765 |
| g MGYG-HGUT-00367  | g unclassified Fungi           | -0.101622402 | 0.188613229 | 0.873641816 |
| g MGYG-HGUT-00367  | g Fusarium                     | -0.103808476 | 0.179231134 | 0.872371283 |
| g MGYG-HGUT-00367  | g Mycosphaerella               | -0.121207024 | 0.116463929 | 0.84672672  |
| g MGYG-HGUT-00367  | g Simplicillium                | 0.078871891  | 0.308054061 | 0.897967316 |
| g MGYG-HGUT-00367  | g unclassified Cordycipitaceae | 0.013385715  | 0.862863237 | 0.994526835 |
| g MGYG-HGUT-00367  | g unidentified                 | -0.00744954  | 0.92342003  | 0.996251765 |
| g Eubacterium A    | g Verticillium                 | -0.015395434 | 0.842523219 | 0.994526835 |
| g Eubacterium A    | g unclassified Tremellomycetes | 0.127504914  | 0.098532163 | 0.8415005   |
| g Eubacterium A    | g Candida                      | 0.007197871  | 0.92599965  | 0.996251765 |
| g Eubacterium A    | g Cladosporium                 | -0.034965759 | 0.651759415 | 0.955597379 |
| g Eubacterium A    | g Debaromyces                  | -0.006122309 | 0.937032581 | 0.996251765 |
| g Eubacterium A    | g Aspergillus                  | 0.031134952  | 0.687796004 | 0.964084767 |
| g Eubacterium A    | g Kazachstania                 | 0.069318949  | 0.37050059  | 0.901117392 |
| g Eubacterium A    | g Malassezia                   | -0.044117889 | 0.568980664 | 0.942564508 |
| g Eubacterium A    | g unclassified Fungi           | -0.107009138 | 0.16612165  | 0.864643535 |
| g Eubacterium A    | g Fusarium                     | -0.032082773 | 0.678810208 | 0.962963695 |
| g Eubacterium A    | g Mycosphaerella               | 0.051905683  | 0.502718914 | 0.936281889 |
| g Eubacterium A    | g Simplicillium                | 0.000475593  | 0.995103553 | 0.999049974 |
| g Eubacterium A    | g unclassified Cordycipitaceae | 0.006107374  | 0.937185871 | 0.996251765 |
| g Eubacterium A    | g unidentified                 | -0.071045365 | 0.358673512 | 0.900151743 |
| g MGYG-HGUT-04061  | g Verticillium                 | -0.072430642 | 0.349355612 | 0.900151743 |
| g MGYG-HGUT-04061  | g unclassified Tremellomycetes | -0.100859557 | 0.191970215 | 0.874689648 |
| g MGYG-HGUT-04061  | g Candida                      | -0.083912052 | 0.278065692 | 0.889320764 |
| g MGYG-HGUT-04061  | g Cladosporium                 | -0.005172912 | 0.946781366 | 0.996925697 |
| g MGYG-HGUT-04061  | g Debaromyces                  | 0.013521353  | 0.861487467 | 0.994526835 |
| g MGYG-HGUT-04061  | g Aspergillus                  | -0.01408031  | 0.855822454 | 0.994526835 |
| g MGYG-HGUT-04061  | g Kazachstania                 | -0.11144112  | 0.149167137 | 0.849249996 |
| g MGYG-HGUT-04061  | g Malassezia                   | 0.047470298  | 0.53995604  | 0.94160936  |
| g MGYG-HGUT-04061  | g unclassified Fungi           | 0.005166537  | 0.94684685  | 0.996925697 |
| g MGYG-HGUT-04061  | g Fusarium                     | -0.019209359 | 0.804218615 | 0.988720167 |
| g MGYG-HGUT-04061  | g Mycosphaerella               | -0.142626994 | 0.064333921 | 0.836350979 |
| g MGYG-HGUT-04061  | g Simplicillium                | 0.094043278  | 0.22391393  | 0.874689648 |
| g MGYG-HGUT-04061  | g unclassified Cordycipitaceae | -0.024383869 | 0.753001231 | 0.980305754 |
| g MGYG-HGUT-04061  | g unidentified                 | -0.037029791 | 0.63266548  | 0.954068873 |
| g MGYG-HGUT-03210  | g Verticillium                 | 0.080873408  | 0.295900666 | 0.892181547 |
| g MGYG-HGUT-03210  | g unclassified Tremellomycetes | -0.144954509 | 0.060058126 | 0.832568254 |
| g MGYG-HGUT-03210  | g Candida                      | -0.059000271 | 0.446074849 | 0.921010267 |
| g MGYG-HGUT-03210  | g Cladosporium                 | -0.138891792 | 0.071713637 | 0.8415005   |
| g MGYG-HGUT-03210  | g Debaromyces                  | -0.017595947 | 0.820371497 | 0.992484281 |
| g MGYG-HGUT-03210  | g Aspergillus                  | -0.00830866  | 0.914620167 | 0.996251765 |
| g MGYG-HGUT-03210  | g Kazachstania                 | -0.14444839  | 0.060967464 | 0.832568254 |
| g MGYG-HGUT-03210  | g Malassezia                   | -0.044138418 | 0.568800705 | 0.942564508 |
| g MGYG-HGUT-03210  | g unclassified Fungi           | 0.081915958  | 0.28969793  | 0.891214772 |
| g MGYG-HGUT-03210  | g Fusarium                     | -0.196342072 | 0.010513809 | 0.613926619 |
| g MGYG-HGUT-03210  | g Mycosphaerella               | -0.090323469 | 0.242855461 | 0.874689648 |
| g MGYG-HGUT-03210  | g Simplicillium                | 0.004899527  | 0.949590119 | 0.99717368  |
| g MGYG-HGUT-03210  | g unclassified Cordycipitaceae | -0.086437393 | 0.263806584 | 0.878368327 |
| g MGYG-HGUT-03210  | g unidentified                 | 0.083111083  | 0.282694922 | 0.8902203   |
| g Intestinibacter  | g Verticillium                 | -0.101074685 | 0.191019142 | 0.874689648 |
| g Intestinibacter  | g unclassified Tremellomycetes | 0.039898178  | 0.606530673 | 0.950933357 |
| g Intestinibacter  | g Candida                      | 0.063225545  | 0.414128824 | 0.915150306 |
| g Intestinibacter  | g Cladosporium                 | 0.033473764  | 0.665704773 | 0.959776195 |
| g Intestinibacter  | g Debaromyces                  | 0.081127731  | 0.294379484 | 0.892181547 |
| g Intestinibacter  | g Aspergillus                  | -0.007139744 | 0.926595564 | 0.996251765 |
| g Intestinibacter  | g Kazachstania                 | 0.090759294  | 0.240580203 | 0.874689648 |
| g Intestinibacter  | g Malassezia                   | -0.056558619 | 0.4651518   | 0.927602832 |
| g Intestinibacter  | g unclassified Fungi           | -0.149743768 | 0.051992965 | 0.832568254 |
| g Intestinibacter  | g Fusarium                     | -0.015677614 | 0.839675321 | 0.994526835 |
| g Intestinibacter  | g Mycosphaerella               | 0.010823059  | 0.88892893  | 0.994639994 |
| g Intestinibacter  | g Simplicillium                | -0.03506412  | 0.650844212 | 0.955597379 |
| g Intestinibacter  | g unclassified Cordycipitaceae | -0.091322822 | 0.237660378 | 0.874689648 |
| g Intestinibacter  | g unidentified                 | -0.137956092 | 0.073666159 | 0.8415005   |
| g Terrisporobacter | g Verticillium                 | -0.072863525 | 0.346475396 | 0.900151743 |

|                      |                                |              |             |             |
|----------------------|--------------------------------|--------------|-------------|-------------|
| g Terrisporobacter   | g unclassified Tremellomycetes | 0.046635627  | 0.547113331 | 0.942564508 |
| g Terrisporobacter   | g Candida                      | 0.002646162  | 0.972761643 | 0.998625698 |
| g Terrisporobacter   | g Cladosporium                 | 0.127497105  | 0.098552959 | 0.8415005   |
| g Terrisporobacter   | g Debaryomyces                 | 0.067726235  | 0.38162193  | 0.90490297  |
| g Terrisporobacter   | g Aspergillus                  | 0.081536608  | 0.291944787 | 0.892181547 |
| g Terrisporobacter   | g Kazachstania                 | 0.026737023  | 0.730046748 | 0.973325332 |
| g Terrisporobacter   | g Malassezia                   | -0.031864678 | 0.680873912 | 0.963605263 |
| g Terrisporobacter   | g unclassified Fungi           | -0.092105053 | 0.233648637 | 0.874689648 |
| g Terrisporobacter   | g Fusarium                     | -0.122542198 | 0.112464349 | 0.843328451 |
| g Terrisporobacter   | g Mycosphaerella               | 0.122370763  | 0.112971805 | 0.843328451 |
| g Terrisporobacter   | g Simplicillium                | 0.001921759  | 0.980216507 | 0.998625698 |
| g Terrisporobacter   | g unclassified Cordycipitaceae | -0.067696344 | 0.381832567 | 0.90490297  |
| g Terrisporobacter   | g unidentified                 | -0.127356569 | 0.098927829 | 0.8415005   |
| g Romboutsia         | g Verticillium                 | -0.152318817 | 0.048041642 | 0.832568254 |
| g Romboutsia         | g unclassified Tremellomycetes | 0.216147347  | 0.004765006 | 0.613926619 |
| g Romboutsia         | g Candida                      | 0.115327853  | 0.135405352 | 0.849249996 |
| g Romboutsia         | g Cladosporium                 | 0.073628015  | 0.341425531 | 0.900151743 |
| g Romboutsia         | g Debaryomyces                 | 0.124311244  | 0.107331337 | 0.843328451 |
| g Romboutsia         | g Aspergillus                  | 0.118929533  | 0.123540746 | 0.849176369 |
| g Romboutsia         | g Kazachstania                 | 0.100785593  | 0.192298005 | 0.874689648 |
| g Romboutsia         | g Malassezia                   | -0.049579876 | 0.522075967 | 0.939740222 |
| g Romboutsia         | g unclassified Fungi           | -0.038096151 | 0.622894019 | 0.952309753 |
| g Romboutsia         | g Fusarium                     | -0.003379155 | 0.965220769 | 0.998625698 |
| g Romboutsia         | g Mycosphaerella               | -0.039597682 | 0.609246084 | 0.951102497 |
| g Romboutsia         | g Simplicillium                | -0.052415762 | 0.498524515 | 0.936166736 |
| g Romboutsia         | g unclassified Cordycipitaceae | -0.069761208 | 0.3674482   | 0.901117392 |
| g Romboutsia         | g unidentified                 | -0.144743084 | 0.060436626 | 0.832568254 |
| g Clostridioides     | g Verticillium                 | -0.0612502   | 0.428893724 | 0.918239588 |
| g Clostridioides     | g unclassified Tremellomycetes | 0.150712605  | 0.050475815 | 0.832568254 |
| g Clostridioides     | g Candida                      | 0.156179722  | 0.042587996 | 0.812441332 |
| g Clostridioides     | g Cladosporium                 | 0.044226587  | 0.568028106 | 0.942564508 |
| g Clostridioides     | g Debaryomyces                 | 0.018687259  | 0.809436978 | 0.989767396 |
| g Clostridioides     | g Aspergillus                  | 0.061170518  | 0.429495617 | 0.918239588 |
| g Clostridioides     | g Kazachstania                 | 0.022697524  | 0.769586635 | 0.98374619  |
| g Clostridioides     | g Malassezia                   | -0.006239241 | 0.935832485 | 0.996251765 |
| g Clostridioides     | g unclassified Fungi           | -0.192970368 | 0.011948275 | 0.659702633 |
| g Clostridioides     | g Fusarium                     | -0.148619681 | 0.053800405 | 0.832568254 |
| g Clostridioides     | g Mycosphaerella               | -0.014608149 | 0.850479576 | 0.994526835 |
| g Clostridioides     | g Simplicillium                | -0.083901205 | 0.278128038 | 0.889320764 |
| g Clostridioides     | g unclassified Cordycipitaceae | -0.06295598  | 0.416125968 | 0.916271642 |
| g Clostridioides     | g unidentified                 | -0.161851157 | 0.035524304 | 0.808354944 |
| g GCA-900066495      | g Verticillium                 | -0.095194192 | 0.218271331 | 0.874689648 |
| g GCA-900066495      | g unclassified Tremellomycetes | 0.20215552   | 0.008394213 | 0.613926619 |
| g GCA-900066495      | g Candida                      | 0.112024936  | 0.147035039 | 0.849249996 |
| g GCA-900066495      | g Cladosporium                 | 0.111746998  | 0.148047171 | 0.849249996 |
| g GCA-900066495      | g Debaryomyces                 | 0.059916573  | 0.43903127  | 0.91979111  |
| g GCA-900066495      | g Aspergillus                  | 0.081954931  | 0.289467753 | 0.891214772 |
| g GCA-900066495      | g Kazachstania                 | 0.052872917  | 0.494781032 | 0.934004873 |
| g GCA-900066495      | g Malassezia                   | 0.018377949  | 0.812532503 | 0.991049439 |
| g GCA-900066495      | g unclassified Fungi           | -0.087071461 | 0.260306314 | 0.878368327 |
| g GCA-900066495      | g Fusarium                     | -0.057602951 | 0.456937794 | 0.924332119 |
| g GCA-900066495      | g Mycosphaerella               | 0.002883315  | 0.970321569 | 0.998625698 |
| g GCA-900066495      | g Simplicillium                | -0.051348236 | 0.507323882 | 0.936546622 |
| g GCA-900066495      | g unclassified Cordycipitaceae | -0.067320033 | 0.384490447 | 0.906174944 |
| g GCA-900066495      | g unidentified                 | -0.101905648 | 0.187377758 | 0.873641816 |
| g Clostridium U      | g Verticillium                 | -0.02097236  | 0.78666256  | 0.986710331 |
| g Clostridium U      | g unclassified Tremellomycetes | 0.19379898   | 0.011580669 | 0.659702633 |
| g Clostridium U      | g Candida                      | 0.077314196  | 0.317735855 | 0.898525398 |
| g Clostridium U      | g Cladosporium                 | 0.159528726  | 0.038287009 | 0.808354944 |
| g Clostridium U      | g Debaryomyces                 | -0.006521458 | 0.932936658 | 0.996251765 |
| g Clostridium U      | g Aspergillus                  | 0.167469159  | 0.029530229 | 0.782890491 |
| g Clostridium U      | g Kazachstania                 | 0.09799244   | 0.20497656  | 0.874689648 |
| g Clostridium U      | g Malassezia                   | 0.033069229  | 0.669505962 | 0.960781149 |
| g Clostridium U      | g unclassified Fungi           | -0.17487896  | 0.022959545 | 0.764130246 |
| g Clostridium U      | g Fusarium                     | 0.055849803  | 0.470772887 | 0.928769554 |
| g Clostridium U      | g Mycosphaerella               | 0.030949347  | 0.689560804 | 0.96434561  |
| g Clostridium U      | g Simplicillium                | 0.067165768  | 0.385583247 | 0.906174944 |
| g Clostridium U      | g unclassified Cordycipitaceae | 0.055800337  | 0.471166546 | 0.928769554 |
| g Clostridium U      | g unidentified                 | -0.251058215 | 0.000993262 | 0.534709451 |
| g Peptostreptococcus | g Verticillium                 | -0.113316018 | 0.142402107 | 0.849249996 |
| g Peptostreptococcus | g unclassified Tremellomycetes | 0.151791612  | 0.048829598 | 0.832568254 |
| g Peptostreptococcus | g Candida                      | 0.111987272  | 0.147171888 | 0.849249996 |
| g Peptostreptococcus | g Cladosporium                 | 0.016994087  | 0.826416878 | 0.993650851 |
| g Peptostreptococcus | g Debaryomyces                 | -0.071551888 | 0.355248641 | 0.900151743 |
| g Peptostreptococcus | g Aspergillus                  | 0.110571669  | 0.152385605 | 0.84984956  |
| g Peptostreptococcus | g Kazachstania                 | 0.066217233  | 0.392343849 | 0.907694413 |
| g Peptostreptococcus | g Malassezia                   | 0.037954795  | 0.624185592 | 0.952309753 |
| g Peptostreptococcus | g unclassified Fungi           | -0.146294576 | 0.057704151 | 0.832568254 |

|                      |                                |              |             |             |
|----------------------|--------------------------------|--------------|-------------|-------------|
| g Peptostreptococcus | g Fusarium                     | -0.055159077 | 0.476286061 | 0.930780596 |
| g Peptostreptococcus | g Mycosphaerella               | -0.105251515 | 0.173229253 | 0.868752404 |
| g Peptostreptococcus | g Simplicillium                | 0.045060683  | 0.560743907 | 0.942564508 |
| g Peptostreptococcus | g unclassified_Cordycipitaceae | 0.038165861  | 0.622257508 | 0.952309753 |
| g Peptostreptococcus | g unidentified                 | -0.133339105 | 0.083939946 | 0.8415005   |
| g GCA-900066935      | g Verticillium                 | -0.08725194  | 0.25931586  | 0.878368327 |
| g GCA-900066935      | g unclassified_Tremellomycetes | 0.209786077  | 0.006190642 | 0.613926619 |
| g GCA-900066935      | g Candida                      | 0.043761448  | 0.572109579 | 0.942887276 |
| g GCA-900066935      | g Cladosporium                 | 0.114262894  | 0.139075547 | 0.849249996 |
| g GCA-900066935      | g Debaromyces                  | 0.060197485  | 0.436884653 | 0.919176572 |
| g GCA-900066935      | g Aspergillus                  | 0.136780514  | 0.076180057 | 0.8415005   |
| g GCA-900066935      | g Kazachstania                 | 0.078706133  | 0.30907503  | 0.897967316 |
| g GCA-900066935      | g Malassezia                   | -0.001028189 | 0.989414566 | 0.999049974 |
| g GCA-900066935      | g unclassified_Fungi           | -0.050257233 | 0.516399577 | 0.938796978 |
| g GCA-900066935      | g Fusarium                     | 0.00205777   | 0.978816662 | 0.998625698 |
| g GCA-900066935      | g Mycosphaerella               | -0.066044914 | 0.393579642 | 0.907694413 |
| g GCA-900066935      | g Simplicillium                | -0.015666092 | 0.839791569 | 0.994526835 |
| g GCA-900066935      | g unclassified_Cordycipitaceae | -0.063596588 | 0.411389054 | 0.913695764 |
| g GCA-900066935      | g unidentified                 | -0.171086041 | 0.026146048 | 0.765986149 |
| g MGYG-HGUT-02072    | g Verticillium                 | -0.014589011 | 0.850673173 | 0.994526835 |
| g MGYG-HGUT-02072    | g unclassified_Tremellomycetes | -0.107693063 | 0.163415484 | 0.860247571 |
| g MGYG-HGUT-02072    | g Candida                      | -0.08111471  | 0.294457243 | 0.892181547 |
| g MGYG-HGUT-02072    | g Cladosporium                 | -0.038457203 | 0.619600312 | 0.952309753 |
| g MGYG-HGUT-02072    | g Debaromyces                  | -0.065141797 | 0.400094479 | 0.910065    |
| g MGYG-HGUT-02072    | g Aspergillus                  | 0.04854134   | 0.530840414 | 0.940412658 |
| g MGYG-HGUT-02072    | g Kazachstania                 | -0.073424707 | 0.342763909 | 0.900151743 |
| g MGYG-HGUT-02072    | g Malassezia                   | 0.000950278  | 0.990216637 | 0.999049974 |
| g MGYG-HGUT-02072    | g unclassified_Fungi           | 0.065410552  | 0.398149072 | 0.909588897 |
| g MGYG-HGUT-02072    | g Fusarium                     | -0.058487873 | 0.450041278 | 0.922479634 |
| g MGYG-HGUT-02072    | g Mycosphaerella               | -0.093412247 | 0.227051199 | 0.874689648 |
| g MGYG-HGUT-02072    | g Simplicillium                | 0.132765943  | 0.085291896 | 0.8415005   |
| g MGYG-HGUT-02072    | g unclassified_Cordycipitaceae | -0.00354454  | 0.963519732 | 0.998529304 |
| g MGYG-HGUT-02072    | g unidentified                 | 0.085187626  | 0.270799571 | 0.882364885 |
| g MGYG-HGUT-01103    | g Verticillium                 | 0.0337607    | 0.66301374  | 0.959259869 |
| g MGYG-HGUT-01103    | g unclassified_Tremellomycetes | -0.11928523  | 0.122414084 | 0.849176369 |
| g MGYG-HGUT-01103    | g Candida                      | -0.10359055  | 0.180150689 | 0.872371283 |
| g MGYG-HGUT-01103    | g Cladosporium                 | -0.051885121 | 0.502888386 | 0.936281889 |
| g MGYG-HGUT-01103    | g Debaromyces                  | -0.103091869 | 0.182267968 | 0.872371283 |
| g MGYG-HGUT-01103    | g Aspergillus                  | 0.04163927   | 0.590904156 | 0.947252808 |
| g MGYG-HGUT-01103    | g Kazachstania                 | -0.059430718 | 0.442758104 | 0.92043404  |
| g MGYG-HGUT-01103    | g Malassezia                   | 0.034706052  | 0.654178355 | 0.956614192 |
| g MGYG-HGUT-01103    | g unclassified_Fungi           | 0.018819365  | 0.808115779 | 0.989341319 |
| g MGYG-HGUT-01103    | g Fusarium                     | -0.071856541 | 0.353198599 | 0.900151743 |
| g MGYG-HGUT-01103    | g Mycosphaerella               | -0.077964916 | 0.313667552 | 0.898525398 |
| g MGYG-HGUT-01103    | g Simplicillium                | 0.122253269  | 0.113320623 | 0.843328451 |
| g MGYG-HGUT-01103    | g unclassified_Cordycipitaceae | -0.03372537  | 0.663344857 | 0.959259869 |
| g MGYG-HGUT-01103    | g unidentified                 | 0.142566297  | 0.064448673 | 0.836350979 |
| g MGYG-HGUT-01823    | g Verticillium                 | 0.046583185  | 0.54756457  | 0.942564508 |
| g MGYG-HGUT-01823    | g unclassified_Tremellomycetes | -0.134743972 | 0.080698848 | 0.8415005   |
| g MGYG-HGUT-01823    | g Candida                      | -0.064155508 | 0.407282197 | 0.913116876 |
| g MGYG-HGUT-01823    | g Cladosporium                 | -0.067202596 | 0.38532219  | 0.906174944 |
| g MGYG-HGUT-01823    | g Debaromyces                  | -0.055447207 | 0.473982037 | 0.929115207 |
| g MGYG-HGUT-01823    | g Aspergillus                  | 0.02878205   | 0.710289983 | 0.968802592 |
| g MGYG-HGUT-01823    | g Kazachstania                 | -0.090032436 | 0.244383141 | 0.874689648 |
| g MGYG-HGUT-01823    | g Malassezia                   | 0.024284188  | 0.753978553 | 0.980575998 |
| g MGYG-HGUT-01823    | g unclassified_Fungi           | 0.007930961  | 0.918487683 | 0.996251765 |
| g MGYG-HGUT-01823    | g Fusarium                     | -0.093096816 | 0.228631006 | 0.874689648 |
| g MGYG-HGUT-01823    | g Mycosphaerella               | -0.088359329 | 0.253295242 | 0.874689648 |
| g MGYG-HGUT-01823    | g Simplicillium                | 0.064023071  | 0.408253126 | 0.913116876 |
| g MGYG-HGUT-01823    | g unclassified_Cordycipitaceae | -0.032681148 | 0.67316044  | 0.961687554 |
| g MGYG-HGUT-01823    | g unidentified                 | 0.120665383  | 0.118117671 | 0.849176369 |
| g MGYG-HGUT-03875    | g Verticillium                 | 0.084561023  | 0.274352652 | 0.886621424 |
| g MGYG-HGUT-03875    | g unclassified_Tremellomycetes | -0.098097461 | 0.204489216 | 0.874689648 |
| g MGYG-HGUT-03875    | g Candida                      | -0.048876674 | 0.528002384 | 0.940363396 |
| g MGYG-HGUT-03875    | g Cladosporium                 | 0.046358109  | 0.549503311 | 0.942564508 |
| g MGYG-HGUT-03875    | g Debaromyces                  | -0.12606352  | 0.102430089 | 0.841929371 |
| g MGYG-HGUT-03875    | g Aspergillus                  | 0.026465055  | 0.732687968 | 0.973693103 |
| g MGYG-HGUT-03875    | g Kazachstania                 | -0.020478708 | 0.791567955 | 0.986710331 |
| g MGYG-HGUT-03875    | g Malassezia                   | 0.049741006  | 0.520722788 | 0.939569324 |
| g MGYG-HGUT-03875    | g unclassified_Fungi           | 0.024172418  | 0.75507487  | 0.981033763 |
| g MGYG-HGUT-03875    | g Fusarium                     | -0.07327275  | 0.343766411 | 0.900151743 |
| g MGYG-HGUT-03875    | g Mycosphaerella               | -0.035529075 | 0.646525122 | 0.955501166 |
| g MGYG-HGUT-03875    | g Simplicillium                | 0.133244124  | 0.084162786 | 0.8415005   |
| g MGYG-HGUT-03875    | g unclassified_Cordycipitaceae | 0.042611826  | 0.582256006 | 0.944873255 |
| g MGYG-HGUT-03875    | g unidentified                 | 0.140925355  | 0.067614976 | 0.836350979 |
| g MGYG-HGUT-03417    | g Verticillium                 | 0.04716151   | 0.542598471 | 0.942219742 |
| g MGYG-HGUT-03417    | g unclassified_Tremellomycetes | -0.026361046 | 0.733698881 | 0.973693103 |
| g MGYG-HGUT-03417    | g Candida                      | -0.004082826 | 0.957984459 | 0.997257748 |



|                   |                                |              |             |             |
|-------------------|--------------------------------|--------------|-------------|-------------|
| g MGYG-HGUT-03417 | g Cladosporium                 | -0.003613497 | 0.962810535 | 0.998526304 |
| g MGYG-HGUT-03417 | g Debaryomyces                 | -0.078421811 | 0.310831435 | 0.897967316 |
| g MGYG-HGUT-03417 | g Aspergillus                  | -0.000522662 | 0.994618967 | 0.999049974 |
| g MGYG-HGUT-03417 | g Kazachstania                 | -0.027240656 | 0.725164115 | 0.972631421 |
| g MGYG-HGUT-03417 | g Malassezia                   | 0.036760946  | 0.635139159 | 0.954116909 |
| g MGYG-HGUT-03417 | g unclassified Fungi           | -0.001483702 | 0.984725444 | 0.999049974 |
| g MGYG-HGUT-03417 | g Fusarium                     | -0.039334138 | 0.611631973 | 0.951172976 |
| g MGYG-HGUT-03417 | g Mycosphaerella               | 0.029678906  | 0.701685152 | 0.967505184 |
| g MGYG-HGUT-03417 | g Simplicillium                | 0.097342482  | 0.208011293 | 0.874689648 |
| g MGYG-HGUT-03417 | g unclassified Cordycipitaceae | 0.032850092  | 0.671568586 | 0.96129685  |
| g MGYG-HGUT-03417 | g unidentified                 | 0.112944139  | 0.143725023 | 0.849249996 |
| g MGYG-HGUT-04044 | g Verticillium                 | -0.014790801 | 0.848632303 | 0.994526835 |
| g MGYG-HGUT-04044 | g unclassified Tremellomycetes | -0.092750894 | 0.230372424 | 0.874689648 |
| g MGYG-HGUT-04044 | g Candida                      | -0.087791843 | 0.256368371 | 0.87575706  |
| g MGYG-HGUT-04044 | g Cladosporium                 | -0.011003642 | 0.887087916 | 0.994526835 |
| g MGYG-HGUT-04044 | g Debaryomyces                 | -0.089021129 | 0.249743596 | 0.874689648 |
| g MGYG-HGUT-04044 | g Aspergillus                  | 0.011085806  | 0.88625047  | 0.994526835 |
| g MGYG-HGUT-04044 | g Kazachstania                 | 0.011836587  | 0.878604137 | 0.994526835 |
| g MGYG-HGUT-04044 | g Malassezia                   | 0.048498147  | 0.531206525 | 0.940412658 |
| g MGYG-HGUT-04044 | g unclassified Fungi           | 0.037834011  | 0.625290107 | 0.952422997 |
| g MGYG-HGUT-04044 | g Fusarium                     | -0.021961199 | 0.776861879 | 0.984510076 |
| g MGYG-HGUT-04044 | g Mycosphaerella               | -0.048423046 | 0.5318434   | 0.940412658 |
| g MGYG-HGUT-04044 | g Simplicillium                | 0.045083724  | 0.560543322 | 0.942564508 |
| g MGYG-HGUT-04044 | g unclassified Cordycipitaceae | -0.043887358 | 0.571003386 | 0.942564508 |
| g MGYG-HGUT-04044 | g unidentified                 | 0.155846866  | 0.043036768 | 0.812441332 |
| g MGYG-HGUT-01658 | g Verticillium                 | -0.050844348 | 0.51150522  | 0.938061907 |
| g MGYG-HGUT-01658 | g unclassified Tremellomycetes | -0.097294365 | 0.208237236 | 0.874689648 |
| g MGYG-HGUT-01658 | g Candida                      | -0.043305099 | 0.576127286 | 0.943618965 |
| g MGYG-HGUT-01658 | g Cladosporium                 | -0.045869256 | 0.55372567  | 0.942564508 |
| g MGYG-HGUT-01658 | g Debaryomyces                 | -0.027159272 | 0.725952377 | 0.972631421 |
| g MGYG-HGUT-01658 | g Aspergillus                  | 0.025849309  | 0.738679328 | 0.976648822 |
| g MGYG-HGUT-01658 | g Kazachstania                 | -0.048211479 | 0.533639589 | 0.940891392 |
| g MGYG-HGUT-01658 | g Malassezia                   | 0.04444556   | 0.566111464 | 0.942564508 |
| g MGYG-HGUT-01658 | g unclassified Fungi           | 0.01710614   | 0.825290585 | 0.993493077 |
| g MGYG-HGUT-01658 | g Fusarium                     | 0.005493013  | 0.943493484 | 0.996925697 |
| g MGYG-HGUT-01658 | g Mycosphaerella               | -0.146352402 | 0.057604309 | 0.832568254 |
| g MGYG-HGUT-01658 | g Simplicillium                | 0.118343346  | 0.125414965 | 0.849176369 |
| g MGYG-HGUT-01658 | g unclassified Cordycipitaceae | -0.011632725 | 0.880679296 | 0.994526835 |
| g MGYG-HGUT-01658 | g unidentified                 | 0.100791657  | 0.192271115 | 0.874689648 |
| g MGYG-HGUT-03224 | g Verticillium                 | -0.034439323 | 0.656666446 | 0.956614192 |
| g MGYG-HGUT-03224 | g unclassified Tremellomycetes | -0.123140174 | 0.110708245 | 0.843328451 |
| g MGYG-HGUT-03224 | g Candida                      | -0.062600769 | 0.418766239 | 0.916661525 |
| g MGYG-HGUT-03224 | g Cladosporium                 | -0.039586019 | 0.609351577 | 0.951102497 |
| g MGYG-HGUT-03224 | g Debaryomyces                 | -0.084714228 | 0.273481016 | 0.886311878 |
| g MGYG-HGUT-03224 | g Aspergillus                  | 0.061426478  | 0.427563925 | 0.918239588 |
| g MGYG-HGUT-03224 | g Kazachstania                 | -0.000465715 | 0.995205249 | 0.999049974 |
| g MGYG-HGUT-03224 | g Malassezia                   | -0.069447348 | 0.369612802 | 0.901117392 |
| g MGYG-HGUT-03224 | g unclassified Fungi           | 0.035369656  | 0.648004687 | 0.955501166 |
| g MGYG-HGUT-03224 | g Fusarium                     | -0.105846543 | 0.170798246 | 0.867877301 |
| g MGYG-HGUT-03224 | g Mycosphaerella               | -0.111238329 | 0.149913178 | 0.849249996 |
| g MGYG-HGUT-03224 | g Simplicillium                | 0.092749615  | 0.23037888  | 0.874689648 |
| g MGYG-HGUT-03224 | g unclassified Cordycipitaceae | -0.097497788 | 0.207283234 | 0.874689648 |
| g MGYG-HGUT-03224 | g unidentified                 | 0.091264527  | 0.23796127  | 0.874689648 |
| g MGYG-HGUT-00893 | g Verticillium                 | 0.023451966  | 0.762153187 | 0.982076388 |
| g MGYG-HGUT-00893 | g unclassified Tremellomycetes | -0.084558613 | 0.274366374 | 0.886621424 |
| g MGYG-HGUT-00893 | g Candida                      | -0.090554495 | 0.241647508 | 0.874689648 |
| g MGYG-HGUT-00893 | g Cladosporium                 | 0.058565022  | 0.449442809 | 0.922032734 |
| g MGYG-HGUT-00893 | g Debaryomyces                 | -0.022403203 | 0.772492294 | 0.984510076 |
| g MGYG-HGUT-00893 | g Aspergillus                  | 0.030236962  | 0.696349906 | 0.967127531 |
| g MGYG-HGUT-00893 | g Kazachstania                 | 0.013523971  | 0.861460918 | 0.994526835 |
| g MGYG-HGUT-00893 | g Malassezia                   | 0.019410264  | 0.802212857 | 0.988396129 |
| g MGYG-HGUT-00893 | g unclassified Fungi           | 0.030529736  | 0.693556785 | 0.966086731 |
| g MGYG-HGUT-00893 | g Fusarium                     | -0.128141424 | 0.096848659 | 0.8415005   |
| g MGYG-HGUT-00893 | g Mycosphaerella               | -0.113276501 | 0.142542244 | 0.849249996 |
| g MGYG-HGUT-00893 | g Simplicillium                | 0.073356022  | 0.343216815 | 0.900151743 |
| g MGYG-HGUT-00893 | g unclassified Cordycipitaceae | -0.000179462 | 0.998152343 | 0.999334917 |
| g MGYG-HGUT-00893 | g unidentified                 | 0.029851984  | 0.700028878 | 0.967505184 |
| g MGYG-HGUT-02098 | g Verticillium                 | -0.077217361 | 0.318344185 | 0.898525398 |
| g MGYG-HGUT-02098 | g unclassified Tremellomycetes | -0.084284271 | 0.275931945 | 0.888419029 |
| g MGYG-HGUT-02098 | g Candida                      | -0.063326358 | 0.413383363 | 0.915150306 |
| g MGYG-HGUT-02098 | g Cladosporium                 | -0.047314571 | 0.541287865 | 0.94160936  |
| g MGYG-HGUT-02098 | g Debaryomyces                 | -0.027708917 | 0.720634315 | 0.971729347 |
| g MGYG-HGUT-02098 | g Aspergillus                  | 0.017340978  | 0.822931269 | 0.992484281 |
| g MGYG-HGUT-02098 | g Kazachstania                 | -0.05691828  | 0.462313807 | 0.927602832 |
| g MGYG-HGUT-02098 | g Malassezia                   | -0.011389805 | 0.883153088 | 0.994526835 |
| g MGYG-HGUT-02098 | g unclassified Fungi           | 0.004885499  | 0.949734259 | 0.99717368  |
| g MGYG-HGUT-02098 | g Fusarium                     | -0.027899853 | 0.718790043 | 0.970778853 |
| g MGYG-HGUT-02098 | g Mycosphaerella               | -0.165488043 | 0.031537325 | 0.796627796 |

|                   |                                       |              |             |             |
|-------------------|---------------------------------------|--------------|-------------|-------------|
| g MGYG-HGUT-02098 | g <i>Simplicillium</i>                | 0.132650128  | 0.085567184 | 0.8415005   |
| g MGYG-HGUT-02098 | g unclassified <i>Cordycipitaceae</i> | -0.077356539 | 0.317470093 | 0.898525398 |
| g MGYG-HGUT-02098 | g unidentified                        | 0.051463032  | 0.506373781 | 0.936546622 |
| g MGYG-HGUT-04088 | g <i>Verticillium</i>                 | -0.015286065 | 0.843627574 | 0.994526835 |
| g MGYG-HGUT-04088 | g unclassified <i>Tremellomycetes</i> | -0.056961095 | 0.4619766   | 0.927602832 |
| g MGYG-HGUT-04088 | g <i>Candida</i>                      | -0.120067353 | 0.119964719 | 0.849176369 |
| g MGYG-HGUT-04088 | g <i>Cladosporium</i>                 | -0.0465935   | 0.547475802 | 0.942564508 |
| g MGYG-HGUT-04088 | g <i>Debaromyces</i>                  | -0.112769384 | 0.14434991  | 0.849249996 |
| g MGYG-HGUT-04088 | g <i>Aspergillus</i>                  | -0.000851016 | 0.991238521 | 0.999049974 |
| g MGYG-HGUT-04088 | g <i>Kazachstania</i>                 | -0.066903597 | 0.38744476  | 0.906329959 |
| g MGYG-HGUT-04088 | g <i>Malassezia</i>                   | -0.008627952 | 0.911352289 | 0.996251765 |
| g MGYG-HGUT-04088 | g unclassified <i>Fungi</i>           | 0.027970761  | 0.718105546 | 0.970731394 |
| g MGYG-HGUT-04088 | g <i>Fusarium</i>                     | -0.002113768 | 0.978240339 | 0.998625698 |
| g MGYG-HGUT-04088 | g <i>Mycosphaerella</i>               | -0.033865661 | 0.66203044  | 0.959259869 |
| g MGYG-HGUT-04088 | g <i>Simplicillium</i>                | 0.080224521  | 0.299805428 | 0.893250141 |
| g MGYG-HGUT-04088 | g unclassified <i>Cordycipitaceae</i> | -0.073415548 | 0.342824281 | 0.900151743 |
| g MGYG-HGUT-04088 | g unidentified                        | 0.137477555  | 0.074681246 | 0.8415005   |
| g RUG563          | g <i>Verticillium</i>                 | 0.047044831  | 0.543598609 | 0.942564508 |
| g RUG563          | g unclassified <i>Tremellomycetes</i> | -0.116602189 | 0.131111563 | 0.849249996 |
| g RUG563          | g <i>Candida</i>                      | -0.058631393 | 0.448928308 | 0.922032734 |
| g RUG563          | g <i>Cladosporium</i>                 | 0.011051166  | 0.88660352  | 0.994526835 |
| g RUG563          | g <i>Debaromyces</i>                  | -0.062783007 | 0.417410456 | 0.916661525 |
| g RUG563          | g <i>Aspergillus</i>                  | 0.002585281  | 0.973388087 | 0.998625698 |
| g RUG563          | g <i>Kazachstania</i>                 | -0.079539194 | 0.303966284 | 0.897852684 |
| g RUG563          | g <i>Malassezia</i>                   | 0.067473734  | 0.383403508 | 0.905460587 |
| g RUG563          | g unclassified <i>Fungi</i>           | -0.007412922 | 0.923795313 | 0.996251765 |
| g RUG563          | g <i>Fusarium</i>                     | -0.029244029 | 0.705852898 | 0.967924917 |
| g RUG563          | g <i>Mycosphaerella</i>               | -0.069751005 | 0.367518445 | 0.901117392 |
| g RUG563          | g <i>Simplicillium</i>                | 0.148570957  | 0.053879911 | 0.832568254 |
| g RUG563          | g unclassified <i>Cordycipitaceae</i> | 0.032511363  | 0.67476169  | 0.961701261 |
| g RUG563          | g unidentified                        | 0.112837344  | 0.144106657 | 0.849249996 |
| g MGYG-HGUT-02097 | g <i>Verticillium</i>                 | 0.044984705  | 0.561405567 | 0.942564508 |
| g MGYG-HGUT-02097 | g unclassified <i>Tremellomycetes</i> | 0.005292401  | 0.945553935 | 0.996925697 |
| g MGYG-HGUT-02097 | g <i>Candida</i>                      | -0.033833941 | 0.66232754  | 0.959259869 |
| g MGYG-HGUT-02097 | g <i>Cladosporium</i>                 | 0.078140823  | 0.312573643 | 0.898139407 |
| g MGYG-HGUT-02097 | g <i>Debaromyces</i>                  | -0.07373011  | 0.340754689 | 0.900151743 |
| g MGYG-HGUT-02097 | g <i>Aspergillus</i>                  | -0.020493445 | 0.791421404 | 0.986710331 |
| g MGYG-HGUT-02097 | g <i>Kazachstania</i>                 | 0.024263729  | 0.754179195 | 0.980698697 |
| g MGYG-HGUT-02097 | g <i>Malassezia</i>                   | 0.014895188  | 0.847576944 | 0.994526835 |
| g MGYG-HGUT-02097 | g unclassified <i>Fungi</i>           | -0.096109119 | 0.213858509 | 0.874689648 |
| g MGYG-HGUT-02097 | g <i>Fusarium</i>                     | -0.053866053 | 0.486700183 | 0.932872225 |
| g MGYG-HGUT-02097 | g <i>Mycosphaerella</i>               | -0.146043655 | 0.058139043 | 0.832568254 |
| g MGYG-HGUT-02097 | g <i>Simplicillium</i>                | 0.124131807  | 0.107843453 | 0.843328451 |
| g MGYG-HGUT-02097 | g unclassified <i>Cordycipitaceae</i> | 0.002163601  | 0.977727475 | 0.998625698 |
| g MGYG-HGUT-02097 | g unidentified                        | 0.068762972  | 0.374359908 | 0.902314617 |
| g UBA11524        | g <i>Verticillium</i>                 | -0.015669701 | 0.839755152 | 0.994526835 |
| g UBA11524        | g unclassified <i>Tremellomycetes</i> | -0.090565624 | 0.241589427 | 0.874689648 |
| g UBA11524        | g <i>Candida</i>                      | -0.074950837 | 0.332798474 | 0.900151743 |
| g UBA11524        | g <i>Cladosporium</i>                 | -0.002600662 | 0.973229822 | 0.998625698 |
| g UBA11524        | g <i>Debaromyces</i>                  | -0.077728298 | 0.315142944 | 0.898525398 |
| g UBA11524        | g <i>Aspergillus</i>                  | 0.043660817  | 0.572994396 | 0.942985175 |
| g UBA11524        | g <i>Kazachstania</i>                 | 0.032323021  | 0.676539651 | 0.962936566 |
| g UBA11524        | g <i>Malassezia</i>                   | 0.018039178  | 0.815926191 | 0.991716521 |
| g UBA11524        | g unclassified <i>Fungi</i>           | 0.012558034  | 0.871267111 | 0.994526835 |
| g UBA11524        | g <i>Fusarium</i>                     | 0.008051495  | 0.917253236 | 0.996251765 |
| g UBA11524        | g <i>Mycosphaerella</i>               | -0.090504938 | 0.241906271 | 0.874689648 |
| g UBA11524        | g <i>Simplicillium</i>                | 0.051963818  | 0.502239937 | 0.936281889 |
| g UBA11524        | g unclassified <i>Cordycipitaceae</i> | -0.020124493 | 0.79509284  | 0.987152004 |
| g UBA11524        | g unidentified                        | 0.071199583  | 0.357628592 | 0.900151743 |
| g MGYG-HGUT-04052 | g <i>Verticillium</i>                 | -0.045824686 | 0.554111417 | 0.942564508 |
| g MGYG-HGUT-04052 | g unclassified <i>Tremellomycetes</i> | -0.038273593 | 0.621274358 | 0.952309753 |
| g MGYG-HGUT-04052 | g <i>Candida</i>                      | -0.02158165  | 0.780619633 | 0.985787047 |
| g MGYG-HGUT-04052 | g <i>Cladosporium</i>                 | 0.007535281  | 0.922541361 | 0.996251765 |
| g MGYG-HGUT-04052 | g <i>Debaromyces</i>                  | -0.034481491 | 0.656272844 | 0.956614192 |
| g MGYG-HGUT-04052 | g <i>Aspergillus</i>                  | -0.005172275 | 0.946787908 | 0.996925697 |
| g MGYG-HGUT-04052 | g <i>Kazachstania</i>                 | -0.066354905 | 0.391358211 | 0.907694413 |
| g MGYG-HGUT-04052 | g <i>Malassezia</i>                   | 0.000856981  | 0.991177115 | 0.999049974 |
| g MGYG-HGUT-04052 | g unclassified <i>Fungi</i>           | 0.020097868  | 0.79535796  | 0.987176079 |
| g MGYG-HGUT-04052 | g <i>Fusarium</i>                     | -0.047731704 | 0.537724076 | 0.941323418 |
| g MGYG-HGUT-04052 | g <i>Mycosphaerella</i>               | -0.127600228 | 0.098278602 | 0.8415005   |
| g MGYG-HGUT-04052 | g <i>Simplicillium</i>                | 0.116572588  | 0.131210101 | 0.849249996 |
| g MGYG-HGUT-04052 | g unclassified <i>Cordycipitaceae</i> | -0.089079652 | 0.249431194 | 0.874689648 |
| g MGYG-HGUT-04052 | g unidentified                        | 0.035086633  | 0.650634819 | 0.955597379 |
| g MGYG-HGUT-01170 | g <i>Verticillium</i>                 | 0.019314496  | 0.80316881  | 0.988396129 |
| g MGYG-HGUT-01170 | g unclassified <i>Tremellomycetes</i> | -0.008201854 | 0.915713632 | 0.996251765 |
| g MGYG-HGUT-01170 | g <i>Candida</i>                      | -0.091509543 | 0.236698413 | 0.874689648 |
| g MGYG-HGUT-01170 | g <i>Cladosporium</i>                 | 0.03144666   | 0.684835968 | 0.963892039 |
| g MGYG-HGUT-01170 | g <i>Debaromyces</i>                  | -0.070787894 | 0.360422276 | 0.900151743 |

|                   |                                |              |             |             |
|-------------------|--------------------------------|--------------|-------------|-------------|
| g MGYG-HGUT-01170 | g Aspergillus                  | -0.010707954 | 0.890102721 | 0.994653074 |
| g MGYG-HGUT-01170 | g Kazachstania                 | -0.075869376 | 0.326890834 | 0.899370541 |
| g MGYG-HGUT-01170 | g Malassezia                   | 0.12630509   | 0.101768468 | 0.841929371 |
| g MGYG-HGUT-01170 | g unclassified_Fungi           | 0.063323606  | 0.413403705 | 0.915150306 |
| g MGYG-HGUT-01170 | g Fusarium                     | -0.046628117 | 0.54717794  | 0.942564508 |
| g MGYG-HGUT-01170 | g Mycosphaerella               | -0.020602509 | 0.790336977 | 0.986710331 |
| g MGYG-HGUT-01170 | g Simplicillium                | 0.055609674  | 0.472685559 | 0.928769554 |
| g MGYG-HGUT-01170 | g unclassified_Cordycipitaceae | 0.002071948  | 0.978670745 | 0.998625698 |
| g MGYG-HGUT-01170 | g unidentified                 | 0.078082371  | 0.312936861 | 0.898306    |
| g MGYG-HGUT-01237 | g Verticillium                 | 0.066456177  | 0.390634122 | 0.907694413 |
| g MGYG-HGUT-01237 | g unclassified_Tremellomycetes | -0.065115304 | 0.400286556 | 0.910065    |
| g MGYG-HGUT-01237 | g Candida                      | -0.021319239 | 0.783220629 | 0.986399684 |
| g MGYG-HGUT-01237 | g Cladosporium                 | 0.006121484  | 0.937041044 | 0.996251765 |
| g MGYG-HGUT-01237 | g Debaryomyces                 | -0.070644578 | 0.361397981 | 0.900157702 |
| g MGYG-HGUT-01237 | g Aspergillus                  | 0.001860855  | 0.980843355 | 0.998625698 |
| g MGYG-HGUT-01237 | g Kazachstania                 | -0.049056    | 0.526487847 | 0.940363396 |
| g MGYG-HGUT-01237 | g Malassezia                   | 0.081000997  | 0.295136866 | 0.892181547 |
| g MGYG-HGUT-01237 | g unclassified_Fungi           | -0.052084471 | 0.501246634 | 0.936281889 |
| g MGYG-HGUT-01237 | g Fusarium                     | -0.060865167 | 0.431806611 | 0.918239588 |
| g MGYG-HGUT-01237 | g Mycosphaerella               | -0.093258863 | 0.227818446 | 0.874689648 |
| g MGYG-HGUT-01237 | g Simplicillium                | 0.095138438  | 0.218542319 | 0.874689648 |
| g MGYG-HGUT-01237 | g unclassified_Cordycipitaceae | -0.007759591 | 0.920243081 | 0.996251765 |
| g MGYG-HGUT-01237 | g unidentified                 | 0.101689923  | 0.188318176 | 0.873641816 |
| g MGYG-HGUT-03227 | g Verticillium                 | 0.150676604  | 0.050531526 | 0.832568254 |
| g MGYG-HGUT-03227 | g unclassified_Tremellomycetes | -0.109873681 | 0.155007047 | 0.850740641 |
| g MGYG-HGUT-03227 | g Candida                      | -0.044962077 | 0.561602698 | 0.942564508 |
| g MGYG-HGUT-03227 | g Cladosporium                 | 0.056411559  | 0.466314972 | 0.927602832 |
| g MGYG-HGUT-03227 | g Debaryomyces                 | -0.107069744 | 0.165880501 | 0.864354699 |
| g MGYG-HGUT-03227 | g Aspergillus                  | 0.092520269  | 0.231538602 | 0.874689648 |
| g MGYG-HGUT-03227 | g Kazachstania                 | -0.055543547 | 0.473213016 | 0.928769554 |
| g MGYG-HGUT-03227 | g Malassezia                   | 0.082029781  | 0.289026027 | 0.891214772 |
| g MGYG-HGUT-03227 | g unclassified_Fungi           | -0.120362368 | 0.119050767 | 0.849176369 |
| g MGYG-HGUT-03227 | g Fusarium                     | 0.011332533  | 0.883736486 | 0.994526835 |
| g MGYG-HGUT-03227 | g Mycosphaerella               | -0.075863855 | 0.326926142 | 0.899370541 |
| g MGYG-HGUT-03227 | g Simplicillium                | 0.077527202  | 0.316400388 | 0.898525398 |
| g MGYG-HGUT-03227 | g unclassified_Cordycipitaceae | 0.124933001  | 0.105571586 | 0.841929371 |
| g MGYG-HGUT-03227 | g unidentified                 | 0.065071102  | 0.400607152 | 0.910569496 |
| g MGYG-HGUT-04235 | g Verticillium                 | 0.113108539  | 0.143139044 | 0.849249996 |
| g MGYG-HGUT-04235 | g unclassified_Tremellomycetes | -0.069151399 | 0.371661054 | 0.901117392 |
| g MGYG-HGUT-04235 | g Candida                      | -0.102057748 | 0.186716773 | 0.873641816 |
| g MGYG-HGUT-04235 | g Cladosporium                 | 0.0427039    | 0.581440315 | 0.944873255 |
| g MGYG-HGUT-04235 | g Debaryomyces                 | -0.048927073 | 0.527576508 | 0.940363396 |
| g MGYG-HGUT-04235 | g Aspergillus                  | -0.036515065 | 0.637405086 | 0.954338328 |
| g MGYG-HGUT-04235 | g Kazachstania                 | -0.060419144 | 0.435195063 | 0.91904345  |
| g MGYG-HGUT-04235 | g Malassezia                   | 0.044833565  | 0.562722889 | 0.942564508 |
| g MGYG-HGUT-04235 | g unclassified_Fungi           | -0.009509354 | 0.902339208 | 0.995280411 |
| g MGYG-HGUT-04235 | g Fusarium                     | -0.112363621 | 0.145808791 | 0.849249996 |
| g MGYG-HGUT-04235 | g Mycosphaerella               | -0.090224664 | 0.243373356 | 0.874689648 |
| g MGYG-HGUT-04235 | g Simplicillium                | 0.141659867  | 0.06618235  | 0.836350979 |
| g MGYG-HGUT-04235 | g unclassified_Cordycipitaceae | -0.009394221 | 0.903515864 | 0.995280411 |
| g MGYG-HGUT-04235 | g unidentified                 | 0.105990769  | 0.170212834 | 0.867136172 |
| g Christensenella | g Verticillium                 | 0.145682895  | 0.058769032 | 0.832568254 |
| g Christensenella | g unclassified_Tremellomycetes | -0.018808003 | 0.808229393 | 0.989349128 |
| g Christensenella | g Candida                      | -0.124659827 | 0.106341934 | 0.842878593 |
| g Christensenella | g Cladosporium                 | -0.008541777 | 0.912234131 | 0.996251765 |
| g Christensenella | g Debaryomyces                 | -0.201533357 | 0.008601353 | 0.613926619 |
| g Christensenella | g Aspergillus                  | 0.02087574   | 0.787622012 | 0.986710331 |
| g Christensenella | g Kazachstania                 | 0.016908739  | 0.827274995 | 0.993650851 |
| g Christensenella | g Malassezia                   | 0.065889948  | 0.394692978 | 0.90854227  |
| g Christensenella | g unclassified_Fungi           | -0.055717929 | 0.471822763 | 0.928769554 |
| g Christensenella | g Fusarium                     | -0.045056632 | 0.560779177 | 0.942564508 |
| g Christensenella | g Mycosphaerella               | -0.071050782 | 0.358636776 | 0.900151743 |
| g Christensenella | g Simplicillium                | 0.086726993  | 0.262203923 | 0.878368327 |
| g Christensenella | g unclassified_Cordycipitaceae | 0.076890579  | 0.320402645 | 0.898741278 |
| g Christensenella | g unidentified                 | 0.064903743  | 0.401822377 | 0.911311025 |
| g Phill           | g Verticillium                 | 0.014389743  | 0.852689511 | 0.994526835 |
| g Phill           | g unclassified_Tremellomycetes | -0.093439367 | 0.226915735 | 0.874689648 |
| g Phill           | g Candida                      | -0.037986327 | 0.623897389 | 0.952309753 |
| g Phill           | g Cladosporium                 | -0.004895982 | 0.949626544 | 0.99717368  |
| g Phill           | g Debaryomyces                 | -0.148247534 | 0.054410122 | 0.832568254 |
| g Phill           | g Aspergillus                  | 0.018260741  | 0.813706257 | 0.991049439 |
| g Phill           | g Kazachstania                 | -0.113444393 | 0.141947587 | 0.849249996 |
| g Phill           | g Malassezia                   | 0.067208482  | 0.385280478 | 0.906174944 |
| g Phill           | g unclassified_Fungi           | 0.009222714  | 0.905269035 | 0.995657731 |
| g Phill           | g Fusarium                     | -0.104500712 | 0.176333141 | 0.871837921 |
| g Phill           | g Mycosphaerella               | -0.108177866 | 0.161517248 | 0.859887758 |
| g Phill           | g Simplicillium                | 0.138636401  | 0.072242343 | 0.8415005   |
| g Phill           | g unclassified_Cordycipitaceae | -0.018240361 | 0.813910396 | 0.991049439 |

|   |                 |   |                              |              |             |             |
|---|-----------------|---|------------------------------|--------------|-------------|-------------|
| g | Phill           | g | unidentified                 | 0.129168612  | 0.094180019 | 0.8415005   |
| g | MGYG-HGUT-04245 | g | Verticillium                 | 0.070032699  | 0.36558213  | 0.901117392 |
| g | MGYG-HGUT-04245 | g | unclassified Tremellomycetes | -0.092031453 | 0.234024063 | 0.874689648 |
| g | MGYG-HGUT-04245 | g | Candida                      | 0.005032114  | 0.948227836 | 0.996925697 |
| g | MGYG-HGUT-04245 | g | Cladosporium                 | -0.027054233 | 0.726970175 | 0.972631421 |
| g | MGYG-HGUT-04245 | g | Debaromyces                  | -0.037659817 | 0.626884492 | 0.952865795 |
| g | MGYG-HGUT-04245 | g | Aspergillus                  | 0.004202836  | 0.956750641 | 0.99717368  |
| g | MGYG-HGUT-04245 | g | Kazachstania                 | -0.037160124 | 0.631467734 | 0.954051837 |
| g | MGYG-HGUT-04245 | g | Malassezia                   | 0.108204957  | 0.161411662 | 0.859887758 |
| g | MGYG-HGUT-04245 | g | unclassified Fungi           | 0.001686242  | 0.982640626 | 0.998625698 |
| g | MGYG-HGUT-04245 | g | Fusarium                     | -0.035346421 | 0.648220449 | 0.955501166 |
| g | MGYG-HGUT-04245 | g | Mycosphaerella               | -0.053752104 | 0.487623751 | 0.932872225 |
| g | MGYG-HGUT-04245 | g | Simplicillium                | 0.045684259  | 0.555327636 | 0.942564508 |
| g | MGYG-HGUT-04245 | g | unclassified Cordycipitaceae | 0.047425241  | 0.540341211 | 0.94160936  |
| g | MGYG-HGUT-04245 | g | unidentified                 | 0.133057216  | 0.08460269  | 0.8415005   |
| g | CAG-1024        | g | Verticillium                 | 0.07723766   | 0.318216605 | 0.898525398 |
| g | CAG-1024        | g | unclassified Tremellomycetes | -0.028293516 | 0.714992724 | 0.970380158 |
| g | CAG-1024        | g | Candida                      | -0.037668947 | 0.626800883 | 0.952865795 |
| g | CAG-1024        | g | Cladosporium                 | 0.042819992  | 0.580412596 | 0.944873255 |
| g | CAG-1024        | g | Debaromyces                  | -0.132183867 | 0.086682672 | 0.8415005   |
| g | CAG-1024        | g | Aspergillus                  | 0.002519526  | 0.974064705 | 0.998625698 |
| g | CAG-1024        | g | Kazachstania                 | -0.029652941 | 0.701933743 | 0.967505184 |
| g | CAG-1024        | g | Malassezia                   | 0.054639576  | 0.480455562 | 0.93260741  |
| g | CAG-1024        | g | unclassified Fungi           | 0.001690877  | 0.982592914 | 0.998625698 |
| g | CAG-1024        | g | Fusarium                     | -0.065259919 | 0.399238749 | 0.909588897 |
| g | CAG-1024        | g | Mycosphaerella               | -0.046878653 | 0.545024595 | 0.942564508 |
| g | CAG-1024        | g | Simplicillium                | 0.084586318  | 0.274208608 | 0.886621424 |
| g | CAG-1024        | g | unclassified Cordycipitaceae | 0.037021601  | 0.632740777 | 0.954068873 |
| g | CAG-1024        | g | unidentified                 | 0.105091854  | 0.173885895 | 0.869335176 |
| g | MGYG-HGUT-00718 | g | Verticillium                 | 0.055429346  | 0.474124691 | 0.929115207 |
| g | MGYG-HGUT-00718 | g | unclassified Tremellomycetes | -0.127047103 | 0.09975728  | 0.8415005   |
| g | MGYG-HGUT-00718 | g | Candida                      | -0.066835198 | 0.387931311 | 0.90700818  |
| g | MGYG-HGUT-00718 | g | Cladosporium                 | -0.012544982 | 0.871399751 | 0.994526835 |
| g | MGYG-HGUT-00718 | g | Debaromyces                  | -0.090997197 | 0.239344507 | 0.874689648 |
| g | MGYG-HGUT-00718 | g | Aspergillus                  | -0.023026121 | 0.766346374 | 0.982494893 |
| g | MGYG-HGUT-00718 | g | Kazachstania                 | -0.038440498 | 0.619752539 | 0.952309753 |
| g | MGYG-HGUT-00718 | g | Malassezia                   | 0.016351628  | 0.832881322 | 0.994526835 |
| g | MGYG-HGUT-00718 | g | unclassified Fungi           | -0.001199586 | 0.987650133 | 0.999049974 |
| g | MGYG-HGUT-00718 | g | Fusarium                     | -0.088649212 | 0.251735277 | 0.874689648 |
| g | MGYG-HGUT-00718 | g | Mycosphaerella               | -0.121412877 | 0.115840168 | 0.845352813 |
| g | MGYG-HGUT-00718 | g | Simplicillium                | 0.14477273   | 0.060383436 | 0.832568254 |
| g | MGYG-HGUT-00718 | g | unclassified Cordycipitaceae | -0.015626585 | 0.840190181 | 0.994526835 |
| g | MGYG-HGUT-00718 | g | unidentified                 | 0.138138238  | 0.073282737 | 0.8415005   |
| g | UBA5394         | g | Verticillium                 | 0.103287247  | 0.181436271 | 0.872371283 |
| g | UBA5394         | g | unclassified Tremellomycetes | 0.017348638  | 0.822854336 | 0.992484281 |
| g | UBA5394         | g | Candida                      | 0.000457936  | 0.995285337 | 0.999049974 |
| g | UBA5394         | g | Cladosporium                 | -0.008717063 | 0.910440518 | 0.996251765 |
| g | UBA5394         | g | Debaromyces                  | -0.066682233 | 0.389020745 | 0.907127903 |
| g | UBA5394         | g | Aspergillus                  | -0.031760122 | 0.6818641   | 0.963892039 |
| g | UBA5394         | g | Kazachstania                 | 0.015330579  | 0.843178058 | 0.994526835 |
| g | UBA5394         | g | Malassezia                   | 0.039225394  | 0.612617638 | 0.951172976 |
| g | UBA5394         | g | unclassified Fungi           | -0.013205279 | 0.864694016 | 0.994526835 |
| g | UBA5394         | g | Fusarium                     | 0.017377372  | 0.822565775 | 0.992484281 |
| g | UBA5394         | g | Mycosphaerella               | 0.025010352  | 0.746867914 | 0.979147232 |
| g | UBA5394         | g | Simplicillium                | 0.09093755   | 0.239653905 | 0.874689648 |
| g | UBA5394         | g | unclassified Cordycipitaceae | 0.093074884  | 0.228741142 | 0.874689648 |
| g | UBA5394         | g | unidentified                 | 0.045066346  | 0.560694608 | 0.942564508 |
| g | PeH17           | g | Verticillium                 | 0.069397262  | 0.369958953 | 0.901117392 |
| g | PeH17           | g | unclassified Tremellomycetes | -0.172429502 | 0.024976548 | 0.765986149 |
| g | PeH17           | g | Candida                      | -0.020267664 | 0.79366761  | 0.986710331 |
| g | PeH17           | g | Cladosporium                 | -0.041019543 | 0.596445236 | 0.947778806 |
| g | PeH17           | g | Debaromyces                  | -0.036782116 | 0.634944226 | 0.954116909 |
| g | PeH17           | g | Aspergillus                  | 0.03949088   | 0.610212479 | 0.951172976 |
| g | PeH17           | g | Kazachstania                 | 0.011701953  | 0.879974516 | 0.994526835 |
| g | PeH17           | g | Malassezia                   | 0.105392568  | 0.172650671 | 0.868752404 |
| g | PeH17           | g | unclassified Fungi           | 0.042677582  | 0.581673416 | 0.944873255 |
| g | PeH17           | g | Fusarium                     | -0.05682871  | 0.463019684 | 0.927602832 |
| g | PeH17           | g | Mycosphaerella               | -0.043703114 | 0.572622412 | 0.942985175 |
| g | PeH17           | g | Simplicillium                | 0.18076811   | 0.018675072 | 0.702895198 |
| g | PeH17           | g | unclassified Cordycipitaceae | -0.013836481 | 0.858292771 | 0.994526835 |
| g | PeH17           | g | unidentified                 | 0.123332854  | 0.110146987 | 0.843328451 |
| g | UBA1685         | g | Verticillium                 | 0.116220235  | 0.132387404 | 0.849249996 |
| g | UBA1685         | g | unclassified Tremellomycetes | -0.080116652 | 0.300457831 | 0.893624742 |
| g | UBA1685         | g | Candida                      | -0.114329768 | 0.138842865 | 0.849249996 |
| g | UBA1685         | g | Cladosporium                 | 0.024858846  | 0.748349726 | 0.979147232 |
| g | UBA1685         | g | Debaromyces                  | -0.122635787 | 0.112188076 | 0.843328451 |
| g | UBA1685         | g | Aspergillus                  | -0.033504778 | 0.665413702 | 0.959776195 |
| g | UBA1685         | g | Kazachstania                 | -0.041055013 | 0.596127462 | 0.947600269 |



|                   |                                |              |             |             |
|-------------------|--------------------------------|--------------|-------------|-------------|
| g UBA1685         | g Malassezia                   | 0.033907362  | 0.661639933 | 0.959190763 |
| g UBA1685         | g unclassified Fungi           | -0.004826289 | 0.950342673 | 0.99717368  |
| g UBA1685         | g Fusarium                     | -0.134353943 | 0.081588397 | 0.8415005   |
| g UBA1685         | g Mycosphaerella               | -0.122987366 | 0.111154951 | 0.843328451 |
| g UBA1685         | g Simplicillium                | 0.118477612  | 0.124983749 | 0.849176369 |
| g UBA1685         | g unclassified Cordycipitaceae | 0.141181169  | 0.067113182 | 0.836350979 |
| g UBA1685         | g unidentified                 | 0.008586307  | 0.911778433 | 0.996251765 |
| g MGYG-HGUT-01665 | g Verticillium                 | 0.014750041  | 0.849044468 | 0.994526835 |
| g MGYG-HGUT-01665 | g unclassified Tremellomycetes | -0.081048402 | 0.294853416 | 0.892181547 |
| g MGYG-HGUT-01665 | g Candida                      | -0.071087417 | 0.3583884   | 0.900151743 |
| g MGYG-HGUT-01665 | g Cladosporium                 | 0.053752071  | 0.487624016 | 0.932872225 |
| g MGYG-HGUT-01665 | g Debaromyces                  | -0.097144697 | 0.208941154 | 0.874689648 |
| g MGYG-HGUT-01665 | g Aspergillus                  | -0.013909068 | 0.857557223 | 0.994526835 |
| g MGYG-HGUT-01665 | g Kazachstania                 | -0.067749599 | 0.381457335 | 0.90490297  |
| g MGYG-HGUT-01665 | g Malassezia                   | -0.072249961 | 0.350562235 | 0.900151743 |
| g MGYG-HGUT-01665 | g unclassified Fungi           | 0.039672188  | 0.608572313 | 0.951102497 |
| g MGYG-HGUT-01665 | g Fusarium                     | -0.116974932 | 0.129875619 | 0.849249996 |
| g MGYG-HGUT-01665 | g Mycosphaerella               | -0.019941898 | 0.796911519 | 0.987463135 |
| g MGYG-HGUT-01665 | g Simplicillium                | 0.047362133  | 0.540880927 | 0.94160936  |
| g MGYG-HGUT-01665 | g unclassified Cordycipitaceae | 0.007806425  | 0.919763305 | 0.996251765 |
| g MGYG-HGUT-01665 | g unidentified                 | 0.090828078  | 0.240222473 | 0.874689648 |
| g MGYG-HGUT-03967 | g Verticillium                 | 0.031971448  | 0.679863318 | 0.96323026  |
| g MGYG-HGUT-03967 | g unclassified Tremellomycetes | -0.107850488 | 0.16279727  | 0.859887758 |
| g MGYG-HGUT-03967 | g Candida                      | -0.07270759  | 0.318405609 | 0.898525398 |
| g MGYG-HGUT-03967 | g Cladosporium                 | -0.002847704 | 0.970687953 | 0.998625698 |
| g MGYG-HGUT-03967 | g Debaromyces                  | -0.105163987 | 0.173589004 | 0.869335176 |
| g MGYG-HGUT-03967 | g Aspergillus                  | -0.026440813 | 0.732923546 | 0.973693103 |
| g MGYG-HGUT-03967 | g Kazachstania                 | -0.081360652 | 0.292990888 | 0.892181547 |
| g MGYG-HGUT-03967 | g Malassezia                   | 0.069565584  | 0.368796441 | 0.901117392 |
| g MGYG-HGUT-03967 | g unclassified Fungi           | 0.042433812  | 0.583834552 | 0.945028002 |
| g MGYG-HGUT-03967 | g Fusarium                     | -0.050217992 | 0.516727561 | 0.938796978 |
| g MGYG-HGUT-03967 | g Mycosphaerella               | -0.066521912 | 0.39016455  | 0.907694413 |
| g MGYG-HGUT-03967 | g Simplicillium                | 0.09517108   | 0.218383633 | 0.874689648 |
| g MGYG-HGUT-03967 | g unclassified Cordycipitaceae | -0.057942849 | 0.45428191  | 0.924332119 |
| g MGYG-HGUT-03967 | g unidentified                 | 0.148025994  | 0.054775792 | 0.832568254 |
| g MGYG-HGUT-04010 | g Verticillium                 | -0.044447167 | 0.566097413 | 0.942564508 |
| g MGYG-HGUT-04010 | g unclassified Tremellomycetes | 0.006252329  | 0.935698175 | 0.996251765 |
| g MGYG-HGUT-04010 | g Candida                      | -0.009575116 | 0.901667219 | 0.995280411 |
| g MGYG-HGUT-04010 | g Cladosporium                 | 0.073154282  | 0.344549262 | 0.900151743 |
| g MGYG-HGUT-04010 | g Debaromyces                  | -0.074125789 | 0.33816269  | 0.900151743 |
| g MGYG-HGUT-04010 | g Aspergillus                  | -0.009393724 | 0.903520942 | 0.995280411 |
| g MGYG-HGUT-04010 | g Kazachstania                 | -0.001819154 | 0.981272571 | 0.998625698 |
| g MGYG-HGUT-04010 | g Malassezia                   | 0.037366246  | 0.629575447 | 0.95377062  |
| g MGYG-HGUT-04010 | g unclassified Fungi           | -0.048966587 | 0.527242729 | 0.940363396 |
| g MGYG-HGUT-04010 | g Fusarium                     | -0.044145998 | 0.568734265 | 0.942564508 |
| g MGYG-HGUT-04010 | g Mycosphaerella               | -0.024024901 | 0.756522563 | 0.981293944 |
| g MGYG-HGUT-04010 | g Simplicillium                | 0.095556116  | 0.216518028 | 0.874689648 |
| g MGYG-HGUT-04010 | g unclassified Cordycipitaceae | -0.045424993 | 0.557576494 | 0.942564508 |
| g MGYG-HGUT-04010 | g unidentified                 | 0.045918923  | 0.553295967 | 0.942564508 |
| g UBA7102         | g Verticillium                 | 0.089578576  | 0.246778853 | 0.874689648 |
| g UBA7102         | g unclassified Tremellomycetes | -0.162390472 | 0.034907439 | 0.808354944 |
| g UBA7102         | g Candida                      | -0.116081086 | 0.132854567 | 0.849249996 |
| g UBA7102         | g Cladosporium                 | -0.04815143  | 0.534149956 | 0.940891392 |
| g UBA7102         | g Debaromyces                  | -0.108284176 | 0.161103207 | 0.859887758 |
| g UBA7102         | g Aspergillus                  | -0.041896813 | 0.588608338 | 0.947252808 |
| g UBA7102         | g Kazachstania                 | -0.0885969   | 0.252016293 | 0.874689648 |
| g UBA7102         | g Malassezia                   | -0.005041028 | 0.948136261 | 0.996925697 |
| g UBA7102         | g unclassified Fungi           | 0.04482578   | 0.562790784 | 0.942564508 |
| g UBA7102         | g Fusarium                     | -0.091693673 | 0.235752466 | 0.874689648 |
| g UBA7102         | g Mycosphaerella               | -0.082274441 | 0.287585304 | 0.891214772 |
| g UBA7102         | g Simplicillium                | 0.172971784  | 0.024517361 | 0.765986149 |
| g UBA7102         | g unclassified Cordycipitaceae | 0.003581306  | 0.963141608 | 0.998529304 |
| g UBA7102         | g unidentified                 | 0.101859253  | 0.187579719 | 0.873641816 |
| g MGYG-HGUT-02629 | g Verticillium                 | 0.090024095  | 0.244427022 | 0.874689648 |
| g MGYG-HGUT-02629 | g unclassified Tremellomycetes | -0.049733768 | 0.520783532 | 0.939569324 |
| g MGYG-HGUT-02629 | g Candida                      | -0.102144622 | 0.18634001  | 0.873641816 |
| g MGYG-HGUT-02629 | g Cladosporium                 | 0.03371094   | 0.66348011  | 0.959259869 |
| g MGYG-HGUT-02629 | g Debaromyces                  | -0.007005134 | 0.927975731 | 0.996251765 |
| g MGYG-HGUT-02629 | g Aspergillus                  | -0.078317128 | 0.311479756 | 0.897967316 |
| g MGYG-HGUT-02629 | g Kazachstania                 | -0.097065701 | 0.209313374 | 0.874689648 |
| g MGYG-HGUT-02629 | g Malassezia                   | 0.069646853  | 0.368235964 | 0.901117392 |
| g MGYG-HGUT-02629 | g unclassified Fungi           | -0.107146535 | 0.16557533  | 0.864354699 |
| g MGYG-HGUT-02629 | g Fusarium                     | -0.003781187 | 0.961086025 | 0.998221928 |
| g MGYG-HGUT-02629 | g Mycosphaerella               | -0.130789162 | 0.090088968 | 0.8415005   |
| g MGYG-HGUT-02629 | g Simplicillium                | 0.110742843  | 0.151747859 | 0.84984956  |
| g MGYG-HGUT-02629 | g unclassified Cordycipitaceae | 0.037971484  | 0.624033042 | 0.952309753 |
| g MGYG-HGUT-02629 | g unidentified                 | 0.050010634  | 0.518462448 | 0.939250598 |
| g MGYG-HGUT-02681 | g Verticillium                 | 0.050288982  | 0.516134295 | 0.938796978 |

|   |                 |                                |              |             |             |
|---|-----------------|--------------------------------|--------------|-------------|-------------|
| g | MGYG-HGUT-02681 | g unclassified Tremellomycetes | -0.097704628 | 0.206316431 | 0.874689648 |
| g | MGYG-HGUT-02681 | g Candida                      | -0.132584254 | 0.085724079 | 0.8415005   |
| g | MGYG-HGUT-02681 | g Cladosporium                 | -0.015717909 | 0.839268811 | 0.994526835 |
| g | MGYG-HGUT-02681 | g Debaryomyces                 | -0.017504795 | 0.821286403 | 0.992484281 |
| g | MGYG-HGUT-02681 | g Aspergillus                  | -0.077022985 | 0.319567561 | 0.898536448 |
| g | MGYG-HGUT-02681 | g Kazachstania                 | -0.025237607 | 0.744646964 | 0.978592408 |
| g | MGYG-HGUT-02681 | g Malassezia                   | 0.0618899    | 0.424079335 | 0.918239588 |
| g | MGYG-HGUT-02681 | g unclassified Fungi           | -0.101500906 | 0.189144995 | 0.873641816 |
| g | MGYG-HGUT-02681 | g Fusarium                     | -0.089466736 | 0.247371696 | 0.874689648 |
| g | MGYG-HGUT-02681 | g Mycosphaerella               | -0.107080609 | 0.165837296 | 0.864354699 |
| g | MGYG-HGUT-02681 | g Simplicillium                | 0.062351602  | 0.420624101 | 0.916661525 |
| g | MGYG-HGUT-02681 | g unclassified Cordycipitaceae | 0.050706345  | 0.51265349  | 0.938277062 |
| g | MGYG-HGUT-02681 | g unidentified                 | 0.004383171  | 0.954896816 | 0.99717368  |
| g | GCA-900066905   | g Verticillium                 | 0.072196401  | 0.350920419 | 0.900151743 |
| g | GCA-900066905   | g unclassified Tremellomycetes | -0.014269692 | 0.853904732 | 0.994526835 |
| g | GCA-900066905   | g Candida                      | -0.01895878  | 0.806722073 | 0.989255135 |
| g | GCA-900066905   | g Cladosporium                 | 0.147981418  | 0.054849612 | 0.832568254 |
| g | GCA-900066905   | g Debaryomyces                 | 0.046332505  | 0.549724072 | 0.942564508 |
| g | GCA-900066905   | g Aspergillus                  | -0.071199994 | 0.357625812 | 0.900151743 |
| g | GCA-900066905   | g Kazachstania                 | 0.067018061  | 0.386631358 | 0.906174944 |
| g | GCA-900066905   | g Malassezia                   | 0.063605119  | 0.411326192 | 0.913695764 |
| g | GCA-900066905   | g unclassified Fungi           | -0.038542195 | 0.618826061 | 0.952309753 |
| g | GCA-900066905   | g Fusarium                     | 0.008824682  | 0.909339541 | 0.996251765 |
| g | GCA-900066905   | g Mycosphaerella               | -0.036850061 | 0.63431875  | 0.954116909 |
| g | GCA-900066905   | g Simplicillium                | 0.146858148  | 0.056737139 | 0.832568254 |
| g | GCA-900066905   | g unclassified Cordycipitaceae | 0.135583073  | 0.078811542 | 0.8415005   |
| g | GCA-900066905   | g unidentified                 | 0.040199148  | 0.603816372 | 0.950399198 |
| g | MGYG-HGUT-00922 | g Verticillium                 | 0.093207087  | 0.228077845 | 0.874689648 |
| g | MGYG-HGUT-00922 | g unclassified Tremellomycetes | -0.096712097 | 0.21098535  | 0.874689648 |
| g | MGYG-HGUT-00922 | g Candida                      | -0.125620211 | 0.103653061 | 0.841929371 |
| g | MGYG-HGUT-00922 | g Cladosporium                 | -0.032115985 | 0.678496155 | 0.962963695 |
| g | MGYG-HGUT-00922 | g Debaryomyces                 | -0.143983842 | 0.061812031 | 0.832568254 |
| g | MGYG-HGUT-00922 | g Aspergillus                  | 0.052952229  | 0.494133097 | 0.933812362 |
| g | MGYG-HGUT-00922 | g Kazachstania                 | -0.093443698 | 0.226894105 | 0.874689648 |
| g | MGYG-HGUT-00922 | g Malassezia                   | 0.081215454  | 0.293855998 | 0.892181547 |
| g | MGYG-HGUT-00922 | g unclassified Fungi           | -0.041978394 | 0.587881957 | 0.947150582 |
| g | MGYG-HGUT-00922 | g Fusarium                     | -0.033360027 | 0.666772644 | 0.959868552 |
| g | MGYG-HGUT-00922 | g Mycosphaerella               | -0.061582431 | 0.426389427 | 0.918239588 |
| g | MGYG-HGUT-00922 | g Simplicillium                | 0.173131802  | 0.024383255 | 0.765986149 |
| g | MGYG-HGUT-00922 | g unclassified Cordycipitaceae | 0.026939853  | 0.728079035 | 0.973007866 |
| g | MGYG-HGUT-00922 | g unidentified                 | 0.140611874  | 0.068234055 | 0.836518447 |
| g | CAG-41          | g Verticillium                 | 0.164727916  | 0.032337621 | 0.802007781 |
| g | CAG-41          | g unclassified Tremellomycetes | 0.071440929  | 0.355997139 | 0.900151743 |
| g | CAG-41          | g Candida                      | -0.135165376 | 0.079746531 | 0.8415005   |
| g | CAG-41          | g Cladosporium                 | 0.13863606   | 0.072243052 | 0.8415005   |
| g | CAG-41          | g Debaryomyces                 | -0.063556609 | 0.411683744 | 0.913695764 |
| g | CAG-41          | g Aspergillus                  | -0.087563108 | 0.257614277 | 0.877677    |
| g | CAG-41          | g Kazachstania                 | 0.021999595  | 0.776482016 | 0.984510076 |
| g | CAG-41          | g Malassezia                   | 0.033695749  | 0.663622507 | 0.959259869 |
| g | CAG-41          | g unclassified Fungi           | -0.123951215 | 0.108360801 | 0.843328451 |
| g | CAG-41          | g Fusarium                     | -0.105564788 | 0.171946191 | 0.867877301 |
| g | CAG-41          | g Mycosphaerella               | -0.108600535 | 0.159875803 | 0.859887758 |
| g | CAG-41          | g Simplicillium                | 0.205937183  | 0.007227651 | 0.613926619 |
| g | CAG-41          | g unclassified Cordycipitaceae | 0.08567075   | 0.2680815   | 0.880185024 |
| g | CAG-41          | g unidentified                 | -0.068179822 | 0.378434213 | 0.904750985 |
| g | UBA4716         | g Verticillium                 | 0.129943824  | 0.092204962 | 0.8415005   |
| g | UBA4716         | g unclassified Tremellomycetes | -0.045056291 | 0.560782144 | 0.942564508 |
| g | UBA4716         | g Candida                      | -0.128629088 | 0.095574327 | 0.8415005   |
| g | UBA4716         | g Cladosporium                 | 0.062885105  | 0.416651999 | 0.916661525 |
| g | UBA4716         | g Debaryomyces                 | -0.12636402  | 0.101607583 | 0.8415005   |
| g | UBA4716         | g Aspergillus                  | -0.153424262 | 0.046423798 | 0.828771778 |
| g | UBA4716         | g Kazachstania                 | -0.054877658 | 0.478542279 | 0.931740764 |
| g | UBA4716         | g Malassezia                   | -0.06767669  | 0.381971108 | 0.904998829 |
| g | UBA4716         | g unclassified Fungi           | -0.143370118 | 0.062942494 | 0.832568254 |
| g | UBA4716         | g Fusarium                     | -0.093811909 | 0.22506063  | 0.874689648 |
| g | UBA4716         | g Mycosphaerella               | -0.041596184 | 0.591288633 | 0.947252808 |
| g | UBA4716         | g Simplicillium                | 0.044610974  | 0.564665669 | 0.942564508 |
| g | UBA4716         | g unclassified Cordycipitaceae | 0.073161561  | 0.344501133 | 0.900151743 |
| g | UBA4716         | g unidentified                 | -0.078727107 | 0.308945722 | 0.897967316 |
| g | MGYG-HGUT-02758 | g Verticillium                 | -0.086415325 | 0.26392898  | 0.878368327 |
| g | MGYG-HGUT-02758 | g unclassified Tremellomycetes | -0.064545559 | 0.404430572 | 0.912338681 |
| g | MGYG-HGUT-02758 | g Candida                      | -0.133158333 | 0.084364473 | 0.8415005   |
| g | MGYG-HGUT-02758 | g Cladosporium                 | 0.029679684  | 0.701677699 | 0.967505184 |
| g | MGYG-HGUT-02758 | g Debaryomyces                 | -0.029504409 | 0.703356427 | 0.967508066 |
| g | MGYG-HGUT-02758 | g Aspergillus                  | 0.024520588  | 0.751661409 | 0.980278684 |
| g | MGYG-HGUT-02758 | g Kazachstania                 | -0.050036728 | 0.518243965 | 0.939250598 |
| g | MGYG-HGUT-02758 | g Malassezia                   | -0.075418817 | 0.329780148 | 0.900003164 |
| g | MGYG-HGUT-02758 | g unclassified Fungi           | -0.059960242 | 0.43869717  | 0.91979111  |

|   |                 |   |                              |              |             |             |
|---|-----------------|---|------------------------------|--------------|-------------|-------------|
| g | MGYG-HGUT-02758 | g | Fusarium                     | -0.134084816 | 0.082206786 | 0.8415005   |
| g | MGYG-HGUT-02758 | g | Mycosphaerella               | -0.093714047 | 0.225546899 | 0.874689648 |
| g | MGYG-HGUT-02758 | g | Simplicillium                | 0.118328453  | 0.125462867 | 0.849176369 |
| g | MGYG-HGUT-02758 | g | unclassified_Cordycipitaceae | -0.106745182 | 0.167174958 | 0.864987015 |
| g | MGYG-HGUT-02758 | g | unidentified                 | 0.014662634  | 0.849928451 | 0.994526835 |
| g | UBA1381         | g | Verticillium                 | 0.066888461  | 0.3875524   | 0.90635195  |
| g | UBA1381         | g | unclassified_Tremellomycetes | 0.113517334  | 0.141689826 | 0.849249996 |
| g | UBA1381         | g | Candida                      | -0.140240927 | 0.068972575 | 0.836518447 |
| g | UBA1381         | g | Cladosporium                 | 0.062978925  | 0.415955755 | 0.916271642 |
| g | UBA1381         | g | Debaromyces                  | -0.125880762 | 0.102932884 | 0.841929371 |
| g | UBA1381         | g | Aspergillus                  | 0.011849713  | 0.878470556 | 0.994526835 |
| g | UBA1381         | g | Kazachstania                 | 0.047608318  | 0.538777012 | 0.941536464 |
| g | UBA1381         | g | Malassezia                   | 0.007734954  | 0.920495479 | 0.996251765 |
| g | UBA1381         | g | unclassified_Fungi           | -0.140136842 | 0.069180964 | 0.836518447 |
| g | UBA1381         | g | Fusarium                     | -0.09861818  | 0.202085172 | 0.874689648 |
| g | UBA1381         | g | Mycosphaerella               | -0.123316236 | 0.110195308 | 0.843328451 |
| g | UBA1381         | g | Simplicillium                | 0.050007214  | 0.518491087 | 0.939250598 |
| g | UBA1381         | g | unclassified_Cordycipitaceae | 0.052711895  | 0.496097886 | 0.934844586 |
| g | UBA1381         | g | unidentified                 | 0.033449159  | 0.665935731 | 0.959776195 |
| g | MGYG-HGUT-03595 | g | Verticillium                 | 0.062318299  | 0.420872776 | 0.916661525 |
| g | MGYG-HGUT-03595 | g | unclassified_Tremellomycetes | -0.041607352 | 0.591188966 | 0.947252808 |
| g | MGYG-HGUT-03595 | g | Candida                      | -0.074472148 | 0.335904102 | 0.900151743 |
| g | MGYG-HGUT-03595 | g | Cladosporium                 | 0.077016327  | 0.319609519 | 0.898536448 |
| g | MGYG-HGUT-03595 | g | Debaromyces                  | -0.032248466 | 0.677243952 | 0.962963695 |
| g | MGYG-HGUT-03595 | g | Aspergillus                  | 0.029494947  | 0.703447091 | 0.967508066 |
| g | MGYG-HGUT-03595 | g | Kazachstania                 | 0.031675494  | 0.682665962 | 0.963892039 |
| g | MGYG-HGUT-03595 | g | Malassezia                   | 0.119998257  | 0.120179563 | 0.849176369 |
| g | MGYG-HGUT-03595 | g | unclassified_Fungi           | -0.038372803 | 0.620369579 | 0.952309753 |
| g | MGYG-HGUT-03595 | g | Fusarium                     | 0.040410132  | 0.601916831 | 0.949974496 |
| g | MGYG-HGUT-03595 | g | Mycosphaerella               | -0.111821554 | 0.147775155 | 0.849249996 |
| g | MGYG-HGUT-03595 | g | Simplicillium                | 0.158012315  | 0.040186867 | 0.808354944 |
| g | MGYG-HGUT-03595 | g | unclassified_Cordycipitaceae | 0.067469994  | 0.383429936 | 0.905460587 |
| g | MGYG-HGUT-03595 | g | unidentified                 | 0.028316188  | 0.714774242 | 0.970380158 |
| g | Monoglobus      | g | Verticillium                 | 0.041146793  | 0.595305564 | 0.947273049 |
| g | Monoglobus      | g | unclassified_Tremellomycetes | 0.032346663  | 0.676316369 | 0.96286903  |
| g | Monoglobus      | g | Candida                      | -0.03530138  | 0.648638782 | 0.955501166 |
| g | Monoglobus      | g | Cladosporium                 | 0.101175869  | 0.190573002 | 0.874689648 |
| g | Monoglobus      | g | Debaromyces                  | -0.085815345 | 0.267271629 | 0.878776924 |
| g | Monoglobus      | g | Aspergillus                  | -0.128108278 | 0.09693576  | 0.8415005   |
| g | Monoglobus      | g | Kazachstania                 | 0.006485549  | 0.933305074 | 0.996251765 |
| g | Monoglobus      | g | Malassezia                   | -0.045553864 | 0.556458126 | 0.942564508 |
| g | Monoglobus      | g | unclassified_Fungi           | -0.064220013 | 0.406809789 | 0.913116876 |
| g | Monoglobus      | g | Fusarium                     | -0.099256348 | 0.199166816 | 0.874689648 |
| g | Monoglobus      | g | Mycosphaerella               | -0.153249215 | 0.046676911 | 0.828771778 |
| g | Monoglobus      | g | Simplicillium                | 0.006791243  | 0.930169225 | 0.996251765 |
| g | Monoglobus      | g | unclassified_Cordycipitaceae | 0.115233933  | 0.135726021 | 0.849249996 |
| g | Monoglobus      | g | unidentified                 | -0.005240702 | 0.946084987 | 0.996925697 |
| g | MGYG-HGUT-01817 | g | Verticillium                 | 0.04763449   | 0.538553582 | 0.941397375 |
| g | MGYG-HGUT-01817 | g | unclassified_Tremellomycetes | -0.166141773 | 0.030862574 | 0.793142358 |
| g | MGYG-HGUT-01817 | g | Candida                      | -0.063141999 | 0.414747195 | 0.915639537 |
| g | MGYG-HGUT-01817 | g | Cladosporium                 | -0.026286999 | 0.734418857 | 0.974226942 |
| g | MGYG-HGUT-01817 | g | Debaromyces                  | -0.122309546 | 0.113153443 | 0.843328451 |
| g | MGYG-HGUT-01817 | g | Aspergillus                  | 0.030942462  | 0.689626306 | 0.96434561  |
| g | MGYG-HGUT-01817 | g | Kazachstania                 | -0.027916772 | 0.718626698 | 0.970778853 |
| g | MGYG-HGUT-01817 | g | Malassezia                   | -0.02468467  | 0.75005441  | 0.980149568 |
| g | MGYG-HGUT-01817 | g | unclassified_Fungi           | -0.138846727 | 0.071806701 | 0.8415005   |
| g | MGYG-HGUT-01817 | g | Fusarium                     | -0.071365267 | 0.356508099 | 0.900151743 |
| g | MGYG-HGUT-01817 | g | Mycosphaerella               | -0.16298619  | 0.034236621 | 0.808354944 |
| g | MGYG-HGUT-01817 | g | Simplicillium                | 0.109754139  | 0.155459397 | 0.851524192 |
| g | MGYG-HGUT-01817 | g | unclassified_Cordycipitaceae | 0.0298691    | 0.699865167 | 0.967505184 |
| g | MGYG-HGUT-01817 | g | unidentified                 | 0.070676792  | 0.361178521 | 0.900157702 |
| g | MGYG-HGUT-00706 | g | Verticillium                 | 0.078185671  | 0.312295142 | 0.898139407 |
| g | MGYG-HGUT-00706 | g | unclassified_Tremellomycetes | -0.129193294 | 0.094116621 | 0.8415005   |
| g | MGYG-HGUT-00706 | g | Candida                      | -0.13637214  | 0.077069397 | 0.8415005   |
| g | MGYG-HGUT-00706 | g | Cladosporium                 | -0.004107762 | 0.957728083 | 0.997257748 |
| g | MGYG-HGUT-00706 | g | Debaromyces                  | -0.088545443 | 0.252292927 | 0.874689648 |
| g | MGYG-HGUT-00706 | g | Aspergillus                  | 0.002294553  | 0.976379815 | 0.998625698 |
| g | MGYG-HGUT-00706 | g | Kazachstania                 | -0.052865411 | 0.494842382 | 0.934004873 |
| g | MGYG-HGUT-00706 | g | Malassezia                   | 0.06823976   | 0.378014197 | 0.904750985 |
| g | MGYG-HGUT-00706 | g | unclassified_Fungi           | 0.032076391  | 0.678870569 | 0.962963695 |
| g | MGYG-HGUT-00706 | g | Fusarium                     | -0.027652036 | 0.721184052 | 0.971835476 |
| g | MGYG-HGUT-00706 | g | Mycosphaerella               | -0.093965163 | 0.224300616 | 0.874689648 |
| g | MGYG-HGUT-00706 | g | Simplicillium                | 0.142967565  | 0.063693144 | 0.835893237 |
| g | MGYG-HGUT-00706 | g | unclassified_Cordycipitaceae | -0.0499813   | 0.518708118 | 0.939250598 |
| g | MGYG-HGUT-00706 | g | unidentified                 | 0.154742908  | 0.044553626 | 0.818828192 |
| g | MGYG-HGUT-04036 | g | Verticillium                 | 0.054887039  | 0.47846698  | 0.931740764 |
| g | MGYG-HGUT-04036 | g | unclassified_Tremellomycetes | -0.115372135 | 0.135254363 | 0.849249996 |
| g | MGYG-HGUT-04036 | g | Candida                      | -0.036643666 | 0.636219538 | 0.954338328 |

|                   |                                |              |             |             |
|-------------------|--------------------------------|--------------|-------------|-------------|
| g MGYG-HGUT-04036 | g Cladosporium                 | -0.040569657 | 0.600482375 | 0.949569069 |
| g MGYG-HGUT-04036 | g Debaryomyces                 | 0.052023118  | 0.501751608 | 0.936281889 |
| g MGYG-HGUT-04036 | g Aspergillus                  | 0.072998915  | 0.345577657 | 0.900151743 |
| g MGYG-HGUT-04036 | g Kazachstania                 | -0.037943863 | 0.624285523 | 0.952309753 |
| g MGYG-HGUT-04036 | g Malassezia                   | 0.070906862  | 0.359613578 | 0.900151743 |
| g MGYG-HGUT-04036 | g unclassified Fungi           | -0.056688126 | 0.464128788 | 0.927602832 |
| g MGYG-HGUT-04036 | g Fusarium                     | -0.01730286  | 0.823314114 | 0.992484281 |
| g MGYG-HGUT-04036 | g Mycosphaerella               | -0.109689859 | 0.155703044 | 0.851524192 |
| g MGYG-HGUT-04036 | g Simplicillium                | 0.013543479  | 0.861263088 | 0.994526835 |
| g MGYG-HGUT-04036 | g unclassified Cordycipitaceae | -0.074608044 | 0.335020566 | 0.900151743 |
| g MGYG-HGUT-04036 | g unidentified                 | -0.073548737 | 0.34194702  | 0.900151743 |
| g MGYG-HGUT-02685 | g Verticillium                 | 0.102143095  | 0.186346626 | 0.873641816 |
| g MGYG-HGUT-02685 | g unclassified Tremellomycetes | 0.001167542  | 0.987979998 | 0.999049974 |
| g MGYG-HGUT-02685 | g Candida                      | 0.048610556  | 0.530253994 | 0.940412658 |
| g MGYG-HGUT-02685 | g Cladosporium                 | -0.015137312 | 0.845130106 | 0.994526835 |
| g MGYG-HGUT-02685 | g Debaryomyces                 | 0.004532248  | 0.95336451  | 0.99717368  |
| g MGYG-HGUT-02685 | g Aspergillus                  | -0.016718227 | 0.829191188 | 0.993650851 |
| g MGYG-HGUT-02685 | g Kazachstania                 | -0.119647088 | 0.121276086 | 0.849176369 |
| g MGYG-HGUT-02685 | g Malassezia                   | -0.007209846 | 0.92587688  | 0.996251765 |
| g MGYG-HGUT-02685 | g unclassified Fungi           | -0.248909664 | 0.001101126 | 0.534709451 |
| g MGYG-HGUT-02685 | g Fusarium                     | -0.091584232 | 0.236314387 | 0.874689648 |
| g MGYG-HGUT-02685 | g Mycosphaerella               | -0.077198824 | 0.318460722 | 0.898525398 |
| g MGYG-HGUT-02685 | g Simplicillium                | 0.070061499  | 0.365384517 | 0.901117392 |
| g MGYG-HGUT-02685 | g unclassified Cordycipitaceae | 0.088211879  | 0.254091277 | 0.874689648 |
| g MGYG-HGUT-02685 | g unidentified                 | 0.01120785   | 0.885006776 | 0.994526835 |
| g UBA9506         | g Verticillium                 | 0.074431098  | 0.336171285 | 0.900151743 |
| g UBA9506         | g unclassified Tremellomycetes | -0.114699057 | 0.137563314 | 0.849249996 |
| g UBA9506         | g Candida                      | -0.167200725 | 0.029795638 | 0.785763434 |
| g UBA9506         | g Cladosporium                 | -0.022355452 | 0.772964008 | 0.984510076 |
| g UBA9506         | g Debaryomyces                 | 0.00871096   | 0.910502966 | 0.996251765 |
| g UBA9506         | g Aspergillus                  | -0.04153747  | 0.591812755 | 0.947273049 |
| g UBA9506         | g Kazachstania                 | 0.009665068  | 0.900748167 | 0.995280411 |
| g UBA9506         | g Malassezia                   | 0.09143572   | 0.237078413 | 0.874689648 |
| g UBA9506         | g unclassified Fungi           | -0.023259924 | 0.764043327 | 0.982298393 |
| g UBA9506         | g Fusarium                     | -0.005459655 | 0.94383607  | 0.996925697 |
| g UBA9506         | g Mycosphaerella               | -0.076607201 | 0.322194663 | 0.89909104  |
| g UBA9506         | g Simplicillium                | 0.073757991  | 0.340571633 | 0.900151743 |
| g UBA9506         | g unclassified Cordycipitaceae | 0.043767803  | 0.572053717 | 0.942887276 |
| g UBA9506         | g unidentified                 | -0.006480624 | 0.933355603 | 0.996251765 |
| g MGYG-HGUT-02683 | g Verticillium                 | 0.022012647  | 0.776352903 | 0.984510076 |
| g MGYG-HGUT-02683 | g unclassified Tremellomycetes | -0.054111533 | 0.48471374  | 0.932872225 |
| g MGYG-HGUT-02683 | g Candida                      | -0.170903366 | 0.026308635 | 0.765986149 |
| g MGYG-HGUT-02683 | g Cladosporium                 | 0.028663694  | 0.711428307 | 0.968802592 |
| g MGYG-HGUT-02683 | g Debaryomyces                 | -0.144243321 | 0.061339113 | 0.832568254 |
| g MGYG-HGUT-02683 | g Aspergillus                  | 0.007814438  | 0.919681225 | 0.996251765 |
| g MGYG-HGUT-02683 | g Kazachstania                 | -0.038017448 | 0.62361299  | 0.952309753 |
| g MGYG-HGUT-02683 | g Malassezia                   | -0.000595647 | 0.993867568 | 0.999049974 |
| g MGYG-HGUT-02683 | g unclassified Fungi           | -0.066453182 | 0.390655525 | 0.907694413 |
| g MGYG-HGUT-02683 | g Fusarium                     | -0.066736752 | 0.388632243 | 0.907127903 |
| g MGYG-HGUT-02683 | g Mycosphaerella               | -0.088355111 | 0.25331799  | 0.874689648 |
| g MGYG-HGUT-02683 | g Simplicillium                | 0.10348273   | 0.18060924  | 0.872371283 |
| g MGYG-HGUT-02683 | g unclassified Cordycipitaceae | 0.036748669  | 0.635252224 | 0.954116909 |
| g MGYG-HGUT-02683 | g unidentified                 | 0.108271837  | 0.161151224 | 0.859887758 |
| g MGYG-HGUT-01024 | g Verticillium                 | 0.124902838  | 0.10565643  | 0.841929371 |
| g MGYG-HGUT-01024 | g unclassified Tremellomycetes | 0.070823615  | 0.360179338 | 0.900151743 |
| g MGYG-HGUT-01024 | g Candida                      | -0.108219679 | 0.161354307 | 0.859887758 |
| g MGYG-HGUT-01024 | g Cladosporium                 | 0.041729263  | 0.590101462 | 0.947252808 |
| g MGYG-HGUT-01024 | g Debaryomyces                 | -0.048370118 | 0.532292467 | 0.940412658 |
| g MGYG-HGUT-01024 | g Aspergillus                  | -0.097360205 | 0.20792812  | 0.874689648 |
| g MGYG-HGUT-01024 | g Kazachstania                 | 0.165072003  | 0.031973239 | 0.796627796 |
| g MGYG-HGUT-01024 | g Malassezia                   | -0.029430988 | 0.704060051 | 0.967508066 |
| g MGYG-HGUT-01024 | g unclassified Fungi           | -0.080435375 | 0.298532868 | 0.892181547 |
| g MGYG-HGUT-01024 | g Fusarium                     | -0.053607236 | 0.488799268 | 0.932872225 |
| g MGYG-HGUT-01024 | g Mycosphaerella               | 0.094917047  | 0.219620745 | 0.874689648 |
| g MGYG-HGUT-01024 | g Simplicillium                | 0.095304436  | 0.217736197 | 0.874689648 |
| g MGYG-HGUT-01024 | g unclassified Cordycipitaceae | 0.076164741  | 0.325005604 | 0.899370541 |
| g MGYG-HGUT-01024 | g unidentified                 | 0.051336519  | 0.507420909 | 0.936546622 |
| g MGYG-HGUT-00495 | g Verticillium                 | 0.033841806  | 0.662253867 | 0.959259869 |
| g MGYG-HGUT-00495 | g unclassified Tremellomycetes | -0.068689811 | 0.37486958  | 0.902543515 |
| g MGYG-HGUT-00495 | g Candida                      | -0.134007372 | 0.082385431 | 0.8415005   |
| g MGYG-HGUT-00495 | g Cladosporium                 | 0.068490369  | 0.376261151 | 0.903077197 |
| g MGYG-HGUT-00495 | g Debaryomyces                 | -0.067089163 | 0.386126615 | 0.906174944 |
| g MGYG-HGUT-00495 | g Aspergillus                  | -0.044105512 | 0.569089176 | 0.942564508 |
| g MGYG-HGUT-00495 | g Kazachstania                 | 0.014275587  | 0.85384505  | 0.994526835 |
| g MGYG-HGUT-00495 | g Malassezia                   | 0.053367451  | 0.490748303 | 0.932872225 |
| g MGYG-HGUT-00495 | g unclassified Fungi           | -0.017018209 | 0.826174391 | 0.993650851 |
| g MGYG-HGUT-00495 | g Fusarium                     | -0.051898176 | 0.502780779 | 0.936281889 |
| g MGYG-HGUT-00495 | g Mycosphaerella               | -0.096601391 | 0.211510773 | 0.874689648 |



|                   |                                       |              |             |             |
|-------------------|---------------------------------------|--------------|-------------|-------------|
| g MGYG-HGUT-00495 | g <i>Simplicillium</i>                | 0.159649347  | 0.038139191 | 0.808354944 |
| g MGYG-HGUT-00495 | g unclassified <i>Cordycipitaceae</i> | 0.002756315  | 0.971628237 | 0.998625698 |
| g MGYG-HGUT-00495 | g unidentified                        | 0.035668823  | 0.645229255 | 0.955501166 |
| g MGYG-HGUT-04193 | g <i>Verticillium</i>                 | -0.039273524 | 0.612181302 | 0.951172976 |
| g MGYG-HGUT-04193 | g unclassified <i>Tremellomycetes</i> | -0.157608629 | 0.040705782 | 0.808354944 |
| g MGYG-HGUT-04193 | g <i>Candida</i>                      | -0.101631013 | 0.188575583 | 0.873641816 |
| g MGYG-HGUT-04193 | g <i>Cladosporium</i>                 | -0.075206633 | 0.331146487 | 0.900151743 |
| g MGYG-HGUT-04193 | g <i>Debaromyces</i>                  | -0.026157642 | 0.735677182 | 0.975335204 |
| g MGYG-HGUT-04193 | g <i>Aspergillus</i>                  | 0.015522218  | 0.841243402 | 0.994526835 |
| g MGYG-HGUT-04193 | g <i>Kazachstania</i>                 | -0.084867287 | 0.272612093 | 0.88516315  |
| g MGYG-HGUT-04193 | g <i>Malassezia</i>                   | -0.055019964 | 0.477400653 | 0.931740764 |
| g MGYG-HGUT-04193 | g unclassified <i>Fungi</i>           | -0.094060785 | 0.22382733  | 0.874689648 |
| g MGYG-HGUT-04193 | g <i>Fusarium</i>                     | -0.05130628  | 0.507671355 | 0.936546622 |
| g MGYG-HGUT-04193 | g <i>Mycosphaerella</i>               | -0.105253756 | 0.173220053 | 0.868752404 |
| g MGYG-HGUT-04193 | g <i>Simplicillium</i>                | 0.12296753   | 0.11121304  | 0.843328451 |
| g MGYG-HGUT-04193 | g unclassified <i>Cordycipitaceae</i> | -0.064086503 | 0.407787922 | 0.913116876 |
| g MGYG-HGUT-04193 | g unidentified                        | 0.074680057  | 0.334552971 | 0.900151743 |
| g MGYG-HGUT-00674 | g <i>Verticillium</i>                 | -0.067080388 | 0.386188883 | 0.906174944 |
| g MGYG-HGUT-00674 | g unclassified <i>Tremellomycetes</i> | -0.110676466 | 0.151994921 | 0.84984956  |
| g MGYG-HGUT-00674 | g <i>Candida</i>                      | -0.019757591 | 0.798748353 | 0.987463135 |
| g MGYG-HGUT-00674 | g <i>Cladosporium</i>                 | -0.023336921 | 0.763285333 | 0.982076388 |
| g MGYG-HGUT-00674 | g <i>Debaromyces</i>                  | 0.0091867    | 0.905637236 | 0.995690688 |
| g MGYG-HGUT-00674 | g <i>Aspergillus</i>                  | -0.034332207 | 0.657666709 | 0.956614192 |
| g MGYG-HGUT-00674 | g <i>Kazachstania</i>                 | -0.044835731 | 0.562703998 | 0.942564508 |
| g MGYG-HGUT-00674 | g <i>Malassezia</i>                   | -0.097739792 | 0.206152393 | 0.874689648 |
| g MGYG-HGUT-00674 | g unclassified <i>Fungi</i>           | -0.080849317 | 0.296045027 | 0.892181547 |
| g MGYG-HGUT-00674 | g <i>Fusarium</i>                     | -0.101467313 | 0.189292217 | 0.873641816 |
| g MGYG-HGUT-00674 | g <i>Mycosphaerella</i>               | -0.078823072 | 0.308354531 | 0.897967316 |
| g MGYG-HGUT-00674 | g <i>Simplicillium</i>                | 0.020775459  | 0.788611865 | 0.986710331 |
| g MGYG-HGUT-00674 | g unclassified <i>Cordycipitaceae</i> | -0.111262575 | 0.149823831 | 0.849249996 |
| g MGYG-HGUT-00674 | g unidentified                        | 0.037541511  | 0.62796833  | 0.953023967 |
| g MGYG-HGUT-04157 | g <i>Verticillium</i>                 | 0.016136515  | 0.835048322 | 0.994526835 |
| g MGYG-HGUT-04157 | g unclassified <i>Tremellomycetes</i> | 0.006070571  | 0.937563616 | 0.996251765 |
| g MGYG-HGUT-04157 | g <i>Candida</i>                      | -0.125938243 | 0.102774538 | 0.841929371 |
| g MGYG-HGUT-04157 | g <i>Cladosporium</i>                 | 0.074095749  | 0.33835903  | 0.900151743 |
| g MGYG-HGUT-04157 | g <i>Debaromyces</i>                  | -0.141362917 | 0.066758523 | 0.836549079 |
| g MGYG-HGUT-04157 | g <i>Aspergillus</i>                  | 0.050189794  | 0.516963308 | 0.938796978 |
| g MGYG-HGUT-04157 | g <i>Kazachstania</i>                 | -0.012274422 | 0.874150135 | 0.994526835 |
| g MGYG-HGUT-04157 | g <i>Malassezia</i>                   | 0.064191987  | 0.407015002 | 0.913116876 |
| g MGYG-HGUT-04157 | g unclassified <i>Fungi</i>           | -0.083011886 | 0.283271816 | 0.8902203   |
| g MGYG-HGUT-04157 | g <i>Fusarium</i>                     | -0.063051594 | 0.415416941 | 0.915917523 |
| g MGYG-HGUT-04157 | g <i>Mycosphaerella</i>               | -0.03786448  | 0.625011404 | 0.952422937 |
| g MGYG-HGUT-04157 | g <i>Simplicillium</i>                | 0.104270368  | 0.177293589 | 0.872371283 |
| g MGYG-HGUT-04157 | g unclassified <i>Cordycipitaceae</i> | 0.05280867   | 0.495306229 | 0.934115958 |
| g MGYG-HGUT-04157 | g unidentified                        | 0.048366258  | 0.532325228 | 0.940412658 |
| g MGYG-HGUT-03943 | g <i>Verticillium</i>                 | -0.05183443  | 0.503306298 | 0.936546622 |
| g MGYG-HGUT-03943 | g unclassified <i>Tremellomycetes</i> | -0.096605248 | 0.211492453 | 0.874689648 |
| g MGYG-HGUT-03943 | g <i>Candida</i>                      | -0.131909688 | 0.087344036 | 0.8415005   |
| g MGYG-HGUT-03943 | g <i>Cladosporium</i>                 | -0.045025782 | 0.561047797 | 0.942564508 |
| g MGYG-HGUT-03943 | g <i>Debaromyces</i>                  | -0.04840894  | 0.531963062 | 0.940412658 |
| g MGYG-HGUT-03943 | g <i>Aspergillus</i>                  | 0.007152791  | 0.926461797 | 0.996251765 |
| g MGYG-HGUT-03943 | g <i>Kazachstania</i>                 | 0.018661166  | 0.809697996 | 0.989833538 |
| g MGYG-HGUT-03943 | g <i>Malassezia</i>                   | -0.058245152 | 0.451927053 | 0.923868417 |
| g MGYG-HGUT-03943 | g unclassified <i>Fungi</i>           | 0.067907451  | 0.38034643  | 0.90490297  |
| g MGYG-HGUT-03943 | g <i>Fusarium</i>                     | -0.101480179 | 0.189235821 | 0.873641816 |
| g MGYG-HGUT-03943 | g <i>Mycosphaerella</i>               | -0.023245354 | 0.76418679  | 0.982298393 |
| g MGYG-HGUT-03943 | g <i>Simplicillium</i>                | 0.100472964  | 0.193687996 | 0.874689648 |
| g MGYG-HGUT-03943 | g unclassified <i>Cordycipitaceae</i> | -0.117311105 | 0.128768641 | 0.849249996 |
| g MGYG-HGUT-03943 | g unidentified                        | 0.077671283  | 0.315499124 | 0.898525398 |
| g CAG-269         | g <i>Verticillium</i>                 | -0.03114226  | 0.687726551 | 0.964084767 |
| g CAG-269         | g unclassified <i>Tremellomycetes</i> | -0.015359542 | 0.842885607 | 0.994526835 |
| g CAG-269         | g <i>Candida</i>                      | -0.058985186 | 0.446191339 | 0.921010267 |
| g CAG-269         | g <i>Cladosporium</i>                 | 0.013078887  | 0.865976882 | 0.994526835 |
| g CAG-269         | g <i>Debaromyces</i>                  | -0.078059056 | 0.313081815 | 0.898307298 |
| g CAG-269         | g <i>Aspergillus</i>                  | -0.015881014 | 0.837623803 | 0.994526835 |
| g CAG-269         | g <i>Kazachstania</i>                 | 0.007660403  | 0.921259279 | 0.996251765 |
| g CAG-269         | g <i>Malassezia</i>                   | 0.011600461  | 0.88100779  | 0.994526835 |
| g CAG-269         | g unclassified <i>Fungi</i>           | -0.181255402 | 0.018353838 | 0.702895198 |
| g CAG-269         | g <i>Fusarium</i>                     | -0.099027078 | 0.200211738 | 0.874689648 |
| g CAG-269         | g <i>Mycosphaerella</i>               | -0.077477628 | 0.316710872 | 0.898525398 |
| g CAG-269         | g <i>Simplicillium</i>                | 0.101547446  | 0.188941165 | 0.873641816 |
| g CAG-269         | g unclassified <i>Cordycipitaceae</i> | -0.073625075 | 0.34144486  | 0.900151743 |
| g CAG-269         | g unidentified                        | -0.043003944 | 0.578785872 | 0.944275589 |
| g MGYG-HGUT-01861 | g <i>Verticillium</i>                 | 0.043901959  | 0.570875171 | 0.942564508 |
| g MGYG-HGUT-01861 | g unclassified <i>Tremellomycetes</i> | 0.079711263  | 0.302918039 | 0.896894041 |
| g MGYG-HGUT-01861 | g <i>Candida</i>                      | 0.020428699  | 0.792065362 | 0.986710331 |
| g MGYG-HGUT-01861 | g <i>Cladosporium</i>                 | 0.077085655  | 0.319172793 | 0.898536448 |
| g MGYG-HGUT-01861 | g <i>Debaromyces</i>                  | -0.106530775 | 0.168034196 | 0.864987015 |

|                   |                                |              |             |             |
|-------------------|--------------------------------|--------------|-------------|-------------|
| g MGYG-HGUT-01861 | g Aspergillus                  | 0.132824861  | 0.085152124 | 0.8415005   |
| g MGYG-HGUT-01861 | g Kazakhstania                 | -0.010336546 | 0.893891782 | 0.995135868 |
| g MGYG-HGUT-01861 | g Malassezia                   | -0.003918889 | 0.959670042 | 0.997919102 |
| g MGYG-HGUT-01861 | g unclassified_Fungi           | -0.047312835 | 0.541302724 | 0.94160936  |
| g MGYG-HGUT-01861 | g Fusarium                     | -0.12883342  | 0.09504435  | 0.8415005   |
| g MGYG-HGUT-01861 | g Mycosphaerella               | 0.124702491  | 0.10622133  | 0.842646593 |
| g MGYG-HGUT-01861 | g Simplicillium                | 0.031831511  | 0.68118796  | 0.963631515 |
| g MGYG-HGUT-01861 | g unclassified_Cordycipitaceae | 0.068323159  | 0.37743026  | 0.90446015  |
| g MGYG-HGUT-01861 | g unidentified                 | 0.001989461  | 0.979519701 | 0.998625698 |
| g CAG-273         | g Verticillium                 | -0.068489696 | 0.376265852 | 0.903077197 |
| g CAG-273         | g unclassified_Tremellomycetes | -0.01370407  | 0.859634845 | 0.994526835 |
| g CAG-273         | g Candida                      | -0.032520437 | 0.674676077 | 0.961701261 |
| g CAG-273         | g Cladosporium                 | -0.036791272 | 0.634859921 | 0.954116909 |
| g CAG-273         | g Debaryomyces                 | -0.027353453 | 0.724072074 | 0.972631421 |
| g CAG-273         | g Aspergillus                  | 0.055733416  | 0.4716994   | 0.928769554 |
| g CAG-273         | g Kazakhstania                 | -0.141824215 | 0.065865217 | 0.836350979 |
| g CAG-273         | g Malassezia                   | -0.09349182  | 0.226653889 | 0.874689648 |
| g CAG-273         | g unclassified_Fungi           | -0.129083089 | 0.094399954 | 0.8415005   |
| g CAG-273         | g Fusarium                     | -0.060416422 | 0.435215785 | 0.91904345  |
| g CAG-273         | g Mycosphaerella               | -0.009361656 | 0.90384871  | 0.995280411 |
| g CAG-273         | g Simplicillium                | 0.059225722  | 0.444335928 | 0.921010267 |
| g CAG-273         | g unclassified_Cordycipitaceae | -0.001531196 | 0.984236562 | 0.999049974 |
| g CAG-273         | g unidentified                 | 0.001275815  | 0.986865408 | 0.999049974 |
| g CAG-245         | g Verticillium                 | -0.051530821 | 0.505813169 | 0.936546622 |
| g CAG-245         | g unclassified_Tremellomycetes | -0.157303216 | 0.041102103 | 0.808354944 |
| g CAG-245         | g Candida                      | -0.042950613 | 0.579257267 | 0.944349272 |
| g CAG-245         | g Cladosporium                 | -0.020852785 | 0.787850006 | 0.986710331 |
| g CAG-245         | g Debaryomyces                 | 0.058362336  | 0.451016058 | 0.923451876 |
| g CAG-245         | g Aspergillus                  | 0.046303382  | 0.549975224 | 0.942564508 |
| g CAG-245         | g Kazakhstania                 | -0.007285792 | 0.925098362 | 0.996251765 |
| g CAG-245         | g Malassezia                   | -0.043404076 | 0.575254765 | 0.943352947 |
| g CAG-245         | g unclassified_Fungi           | 0.103072051  | 0.182352486 | 0.872371283 |
| g CAG-245         | g Fusarium                     | -0.038368076 | 0.620412677 | 0.952309753 |
| g CAG-245         | g Mycosphaerella               | -0.07488842  | 0.333202376 | 0.900151743 |
| g CAG-245         | g Simplicillium                | 0.135275584  | 0.079498974 | 0.8415005   |
| g CAG-245         | g unclassified_Cordycipitaceae | -0.146340185 | 0.057625391 | 0.832568254 |
| g CAG-245         | g unidentified                 | 0.111940603  | 0.147341588 | 0.849249996 |
| g MGYG-HGUT-01195 | g Verticillium                 | -0.006994849 | 0.928081193 | 0.996251765 |
| g MGYG-HGUT-01195 | g unclassified_Tremellomycetes | 0.053127769  | 0.492700628 | 0.933370788 |
| g MGYG-HGUT-01195 | g Candida                      | 0.060809353  | 0.432229799 | 0.918239588 |
| g MGYG-HGUT-01195 | g Cladosporium                 | 0.035468927  | 0.647083188 | 0.955501166 |
| g MGYG-HGUT-01195 | g Debaryomyces                 | -0.064474709 | 0.404947665 | 0.912343629 |
| g MGYG-HGUT-01195 | g Aspergillus                  | -0.007124446 | 0.9267524   | 0.996251765 |
| g MGYG-HGUT-01195 | g Kazakhstania                 | -0.040794218 | 0.598465704 | 0.948266952 |
| g MGYG-HGUT-01195 | g Malassezia                   | -0.075784444 | 0.327434231 | 0.899370541 |
| g MGYG-HGUT-01195 | g unclassified_Fungi           | -0.202428273 | 0.008304807 | 0.613926619 |
| g MGYG-HGUT-01195 | g Fusarium                     | -0.036800678 | 0.634773324 | 0.954116909 |
| g MGYG-HGUT-01195 | g Mycosphaerella               | -0.014066114 | 0.855966244 | 0.994526835 |
| g MGYG-HGUT-01195 | g Simplicillium                | 0.057766272  | 0.455660567 | 0.924332119 |
| g MGYG-HGUT-01195 | g unclassified_Cordycipitaceae | -0.053404476 | 0.490447081 | 0.932872225 |
| g MGYG-HGUT-01195 | g unidentified                 | -0.020805892 | 0.788315814 | 0.986710331 |
| g MGYG-HGUT-02797 | g Verticillium                 | 0.094518355  | 0.221572361 | 0.874689648 |
| g MGYG-HGUT-02797 | g unclassified_Tremellomycetes | 0.077343993  | 0.317548821 | 0.898525398 |
| g MGYG-HGUT-02797 | g Candida                      | -0.12996324  | 0.09215592  | 0.8415005   |
| g MGYG-HGUT-02797 | g Cladosporium                 | 0.131772718  | 0.087675936 | 0.8415005   |
| g MGYG-HGUT-02797 | g Debaryomyces                 | -0.078462531 | 0.310579485 | 0.897967316 |
| g MGYG-HGUT-02797 | g Aspergillus                  | 0.061864263  | 0.424271676 | 0.918239588 |
| g MGYG-HGUT-02797 | g Kazakhstania                 | -0.055519018 | 0.473408753 | 0.928769554 |
| g MGYG-HGUT-02797 | g Malassezia                   | 0.062536533  | 0.419244741 | 0.916661525 |
| g MGYG-HGUT-02797 | g unclassified_Fungi           | 0.009031808  | 0.907221052 | 0.996251765 |
| g MGYG-HGUT-02797 | g Fusarium                     | -0.070611172 | 0.361625645 | 0.900258553 |
| g MGYG-HGUT-02797 | g Mycosphaerella               | 0.035878751  | 0.643284629 | 0.955341199 |
| g MGYG-HGUT-02797 | g Simplicillium                | 0.138493242  | 0.07254009  | 0.8415005   |
| g MGYG-HGUT-02797 | g unclassified_Cordycipitaceae | 0.131063492  | 0.089410668 | 0.8415005   |
| g MGYG-HGUT-02797 | g unidentified                 | 0.012599727  | 0.870843433 | 0.994526835 |
| g CAG-492         | g Verticillium                 | -0.046571942 | 0.547661338 | 0.942564508 |
| g CAG-492         | g unclassified_Tremellomycetes | -0.041055881 | 0.596119689 | 0.947600269 |
| g CAG-492         | g Candida                      | -0.031457906 | 0.684729265 | 0.963892039 |
| g CAG-492         | g Cladosporium                 | 0.090191235  | 0.243548751 | 0.874689648 |
| g CAG-492         | g Debaryomyces                 | -0.050525761 | 0.514158071 | 0.938402049 |
| g CAG-492         | g Aspergillus                  | -0.042512062 | 0.583140429 | 0.945010741 |
| g CAG-492         | g Kazakhstania                 | 0.069178512  | 0.371473115 | 0.901117392 |
| g CAG-492         | g Malassezia                   | 0.039700854  | 0.608313172 | 0.951102497 |
| g CAG-492         | g unclassified_Fungi           | 0.0239427    | 0.757329632 | 0.981293944 |
| g CAG-492         | g Fusarium                     | -0.072594869 | 0.348261151 | 0.900151743 |
| g CAG-492         | g Mycosphaerella               | -0.051614137 | 0.505124585 | 0.936546622 |
| g CAG-492         | g Simplicillium                | 0.094843024  | 0.219982164 | 0.874689648 |
| g CAG-492         | g unclassified_Cordycipitaceae | -0.066701391 | 0.388884201 | 0.907127903 |

|                   |                                |              |             |             |
|-------------------|--------------------------------|--------------|-------------|-------------|
| g CAG-492         | g unidentified                 | 0.120512702  | 0.118587119 | 0.849176369 |
| g CAG-354         | g Verticillium                 | -0.109139365 | 0.157801408 | 0.855241398 |
| g CAG-354         | g unclassified Tremellomycetes | 0.123854324  | 0.108639167 | 0.843328451 |
| g CAG-354         | g Candida                      | 0.059626853  | 0.441251463 | 0.920204792 |
| g CAG-354         | g Cladosporium                 | 0.067521693  | 0.383064734 | 0.905460587 |
| g CAG-354         | g Debaromyces                  | -0.065959707 | 0.394191566 | 0.907841086 |
| g CAG-354         | g Aspergillus                  | 0.127040678  | 0.09977456  | 0.8415005   |
| g CAG-354         | g Kazachstania                 | 0.057672824  | 0.456391116 | 0.924332119 |
| g CAG-354         | g Malassezia                   | 0.025671417  | 0.740413213 | 0.977217936 |
| g CAG-354         | g unclassified Fungi           | -0.183537504 | 0.01691241  | 0.702895198 |
| g CAG-354         | g Fusarium                     | -0.083082056 | 0.28286365  | 0.8902203   |
| g CAG-354         | g Mycosphaerella               | 0.04341804   | 0.575131723 | 0.943352947 |
| g CAG-354         | g Simplicillium                | 0.07353219   | 0.342055932 | 0.900151743 |
| g CAG-354         | g unclassified Cordycipitaceae | -0.086772476 | 0.261952823 | 0.878368327 |
| g CAG-354         | g unidentified                 | -0.089025566 | 0.249719902 | 0.874689648 |
| g CAG-452         | g Verticillium                 | 0.052502373  | 0.497814144 | 0.93540393  |
| g CAG-452         | g unclassified Tremellomycetes | -0.091303528 | 0.237759938 | 0.874689648 |
| g CAG-452         | g Candida                      | -0.036295305 | 0.639433135 | 0.955341199 |
| g CAG-452         | g Cladosporium                 | -0.022006598 | 0.776412738 | 0.984510076 |
| g CAG-452         | g Debaromyces                  | -0.072014067 | 0.352141507 | 0.900151743 |
| g CAG-452         | g Aspergillus                  | 0.072030871  | 0.352028859 | 0.900151743 |
| g CAG-452         | g Kazachstania                 | -0.06722487  | 0.385164356 | 0.906174944 |
| g CAG-452         | g Malassezia                   | -0.072916592 | 0.346123347 | 0.900151743 |
| g CAG-452         | g unclassified Fungi           | -0.158362753 | 0.039740918 | 0.808354944 |
| g CAG-452         | g Fusarium                     | 0.049063119  | 0.526427764 | 0.940363396 |
| g CAG-452         | g Mycosphaerella               | -0.120232182 | 0.119453411 | 0.849176369 |
| g CAG-452         | g Simplicillium                | 0.099968631  | 0.19594571  | 0.874689648 |
| g CAG-452         | g unclassified Cordycipitaceae | 0.051192531  | 0.508614043 | 0.936621389 |
| g CAG-452         | g unidentified                 | 0.018832537  | 0.80798408  | 0.989341319 |
| g MGYG-HGUT-00948 | g Verticillium                 | -0.022692159 | 0.769639572 | 0.98374619  |
| g MGYG-HGUT-00948 | g unclassified Tremellomycetes | -0.158096786 | 0.040078991 | 0.808354944 |
| g MGYG-HGUT-00948 | g Candida                      | -0.095741396 | 0.215624359 | 0.874689648 |
| g MGYG-HGUT-00948 | g Cladosporium                 | -0.011068707 | 0.886424736 | 0.994526835 |
| g MGYG-HGUT-00948 | g Debaromyces                  | -0.012311397 | 0.87377418  | 0.994526835 |
| g MGYG-HGUT-00948 | g Aspergillus                  | 0.018895824  | 0.807351357 | 0.989255135 |
| g MGYG-HGUT-00948 | g Kazachstania                 | 0.011862548  | 0.878339941 | 0.994526835 |
| g MGYG-HGUT-00948 | g Malassezia                   | -0.035879716 | 0.643275701 | 0.955341199 |
| g MGYG-HGUT-00948 | g unclassified Fungi           | -0.017395433 | 0.822384401 | 0.992484281 |
| g MGYG-HGUT-00948 | g Fusarium                     | -0.031334723 | 0.685898392 | 0.963892039 |
| g MGYG-HGUT-00948 | g Mycosphaerella               | -0.118439677 | 0.125105468 | 0.849176369 |
| g MGYG-HGUT-00948 | g Simplicillium                | 0.065317726  | 0.398820363 | 0.909588897 |
| g MGYG-HGUT-00948 | g unclassified Cordycipitaceae | -0.105690575 | 0.171432994 | 0.867877301 |
| g MGYG-HGUT-00948 | g unidentified                 | 0.127793973  | 0.097764784 | 0.8415005   |
| g MGYG-HGUT-04311 | g Verticillium                 | -0.039349778 | 0.611490276 | 0.951172976 |
| g MGYG-HGUT-04311 | g unclassified Tremellomycetes | -0.094158815 | 0.223342864 | 0.874689648 |
| g MGYG-HGUT-04311 | g Candida                      | 0.118773625  | 0.124037104 | 0.849176369 |
| g MGYG-HGUT-04311 | g Cladosporium                 | -0.09559415  | 0.216334363 | 0.874689648 |
| g MGYG-HGUT-04311 | g Debaromyces                  | 0.092044625  | 0.233956839 | 0.874689648 |
| g MGYG-HGUT-04311 | g Aspergillus                  | 0.057789836  | 0.455476451 | 0.924332119 |
| g MGYG-HGUT-04311 | g Kazachstania                 | -0.137416888 | 0.074810739 | 0.8415005   |
| g MGYG-HGUT-04311 | g Malassezia                   | 0.023443411  | 0.76223736  | 0.982076388 |
| g MGYG-HGUT-04311 | g unclassified Fungi           | 0.008424381  | 0.913435622 | 0.996251765 |
| g MGYG-HGUT-04311 | g Fusarium                     | 0.026027709  | 0.736941817 | 0.976057954 |
| g MGYG-HGUT-04311 | g Mycosphaerella               | -0.062486378 | 0.419618573 | 0.916661525 |
| g MGYG-HGUT-04311 | g Simplicillium                | 0.138677712  | 0.072156608 | 0.8415005   |
| g MGYG-HGUT-04311 | g unclassified Cordycipitaceae | -0.126391833 | 0.101531719 | 0.8415005   |
| g MGYG-HGUT-04311 | g unidentified                 | 0.104504889  | 0.176315759 | 0.871837921 |
| g MGYG-HGUT-02769 | g Verticillium                 | 0.005409387  | 0.944352348 | 0.996925697 |
| g MGYG-HGUT-02769 | g unclassified Tremellomycetes | -0.069348353 | 0.370297169 | 0.901117392 |
| g MGYG-HGUT-02769 | g Candida                      | 0.031765107  | 0.681816877 | 0.963892039 |
| g MGYG-HGUT-02769 | g Cladosporium                 | -0.055164097 | 0.476245872 | 0.930780596 |
| g MGYG-HGUT-02769 | g Debaromyces                  | 0.045304833  | 0.558620248 | 0.942564508 |
| g MGYG-HGUT-02769 | g Aspergillus                  | 0.154866395  | 0.044381763 | 0.817455693 |
| g MGYG-HGUT-02769 | g Kazachstania                 | -0.053885995 | 0.486538647 | 0.932872225 |
| g MGYG-HGUT-02769 | g Malassezia                   | -0.014014895 | 0.856485062 | 0.994526835 |
| g MGYG-HGUT-02769 | g unclassified Fungi           | 0.14770631   | 0.055307034 | 0.832568254 |
| g MGYG-HGUT-02769 | g Fusarium                     | 0.145981033  | 0.058247998 | 0.832568254 |
| g MGYG-HGUT-02769 | g Mycosphaerella               | 0.138495144  | 0.072536128 | 0.8415005   |
| g MGYG-HGUT-02769 | g Simplicillium                | 0.028941071  | 0.708761557 | 0.968657831 |
| g MGYG-HGUT-02769 | g unclassified Cordycipitaceae | -0.144338862 | 0.061165733 | 0.832568254 |
| g MGYG-HGUT-02769 | g unidentified                 | 0.19081336   | 0.012953696 | 0.67520225  |
| g CAG-465         | g Verticillium                 | -0.063741992 | 0.410318315 | 0.913116876 |
| g CAG-465         | g unclassified Tremellomycetes | 0.061102492  | 0.430009839 | 0.918239588 |
| g CAG-465         | g Candida                      | 0.028097241  | 0.716885146 | 0.97067915  |
| g CAG-465         | g Cladosporium                 | 0.041334249  | 0.593628465 | 0.947273049 |
| g CAG-465         | g Debaromyces                  | 0.073753236  | 0.340602849 | 0.900151743 |
| g CAG-465         | g Aspergillus                  | -0.00105145  | 0.989175106 | 0.999049974 |
| g CAG-465         | g Kazachstania                 | 0.035871833  | 0.643348674 | 0.955341199 |

|                   |                                |              |             |             |
|-------------------|--------------------------------|--------------|-------------|-------------|
| g CAG-465         | g Malassezia                   | -0.056475168 | 0.46581166  | 0.927602832 |
| g CAG-465         | g unclassified Fungi           | -0.143690807 | 0.0623497   | 0.832568254 |
| g CAG-465         | g Fusarium                     | -0.137667558 | 0.074276859 | 0.8415005   |
| g CAG-465         | g Mycosphaerella               | -0.048036293 | 0.535129206 | 0.941323418 |
| g CAG-465         | g Simplicillium                | -0.089679199 | 0.246246313 | 0.874689648 |
| g CAG-465         | g unclassified Cordycipitaceae | -0.083402731 | 0.281003378 | 0.8902203   |
| g CAG-465         | g unidentified                 | -0.112181375 | 0.146467666 | 0.849249996 |
| g MGYG-HGUT-02571 | g Verticillium                 | 0.088043507  | 0.255002374 | 0.874689648 |
| g MGYG-HGUT-02571 | g unclassified Tremellomycetes | -0.044255711 | 0.567773012 | 0.942564508 |
| g MGYG-HGUT-02571 | g Candida                      | -0.013383311 | 0.862887621 | 0.994526835 |
| g MGYG-HGUT-02571 | g Cladosporium                 | 0.090524517  | 0.241804016 | 0.874689648 |
| g MGYG-HGUT-02571 | g Debaromyces                  | -0.041740041 | 0.590005363 | 0.947252808 |
| g MGYG-HGUT-02571 | g Aspergillus                  | 0.056446737  | 0.466036585 | 0.927602832 |
| g MGYG-HGUT-02571 | g Kazachstania                 | 0.070772569  | 0.360526533 | 0.900151743 |
| g MGYG-HGUT-02571 | g Malassezia                   | 0.038397438  | 0.620145001 | 0.952309753 |
| g MGYG-HGUT-02571 | g unclassified Fungi           | -0.118590047 | 0.124623529 | 0.849176369 |
| g MGYG-HGUT-02571 | g Fusarium                     | 0.113348209  | 0.142288028 | 0.849249996 |
| g MGYG-HGUT-02571 | g Mycosphaerella               | 0.051390328  | 0.506975402 | 0.936546622 |
| g MGYG-HGUT-02571 | g Simplicillium                | 0.073286675  | 0.343674468 | 0.900151743 |
| g MGYG-HGUT-02571 | g unclassified Cordycipitaceae | 0.130834723  | 0.089976031 | 0.8415005   |
| g MGYG-HGUT-02571 | g unidentified                 | -0.00272511  | 0.971949308 | 0.998625698 |
| g QALS01          | g Verticillium                 | 0.09065602   | 0.241117999 | 0.874689648 |
| g QALS01          | g unclassified Tremellomycetes | -0.099713656 | 0.197094392 | 0.874689648 |
| g QALS01          | g Candida                      | -0.06308753  | 0.41515064  | 0.915917523 |
| g QALS01          | g Cladosporium                 | 0.024209191  | 0.754714117 | 0.980873421 |
| g QALS01          | g Debaromyces                  | -0.063544788 | 0.411770902 | 0.913695764 |
| g QALS01          | g Aspergillus                  | 0.040547551  | 0.600681063 | 0.949569069 |
| g QALS01          | g Kazachstania                 | -0.127782879 | 0.097794148 | 0.8415005   |
| g QALS01          | g Malassezia                   | 0.075745571  | 0.327683131 | 0.899370541 |
| g QALS01          | g unclassified Fungi           | -0.15186924  | 0.048712904 | 0.832568254 |
| g QALS01          | g Fusarium                     | -0.055850291 | 0.470769004 | 0.928769554 |
| g QALS01          | g Mycosphaerella               | -0.060850575 | 0.431917231 | 0.918239588 |
| g QALS01          | g Simplicillium                | 0.109600372  | 0.156042715 | 0.852150641 |
| g QALS01          | g unclassified Cordycipitaceae | 0.045035842  | 0.560960195 | 0.942564508 |
| g QALS01          | g unidentified                 | 0.049279363  | 0.524604463 | 0.939740222 |
| g MGYG-HGUT-03248 | g Verticillium                 | 0.144559682  | 0.060766544 | 0.832568254 |
| g MGYG-HGUT-03248 | g unclassified Tremellomycetes | 0.01588952   | 0.837538024 | 0.994526835 |
| g MGYG-HGUT-03248 | g Candida                      | -0.054403462 | 0.48233571  | 0.932872225 |
| g MGYG-HGUT-03248 | g Cladosporium                 | 0.036410969  | 0.638365399 | 0.954857193 |
| g MGYG-HGUT-03248 | g Debaromyces                  | -0.104823989 | 0.174991684 | 0.871655497 |
| g MGYG-HGUT-03248 | g Aspergillus                  | 0.041669421  | 0.590635163 | 0.947252808 |
| g MGYG-HGUT-03248 | g Kazachstania                 | -0.032146819 | 0.67820464  | 0.962963695 |
| g MGYG-HGUT-03248 | g Malassezia                   | -0.075412766 | 0.329819065 | 0.900003164 |
| g MGYG-HGUT-03248 | g unclassified Fungi           | -0.084465524 | 0.274896925 | 0.887093051 |
| g MGYG-HGUT-03248 | g Fusarium                     | -0.051470688 | 0.506310449 | 0.936546622 |
| g MGYG-HGUT-03248 | g Mycosphaerella               | 0.026019888  | 0.737017959 | 0.976057954 |
| g MGYG-HGUT-03248 | g Simplicillium                | 0.075349967  | 0.330223106 | 0.900151743 |
| g MGYG-HGUT-03248 | g unclassified Cordycipitaceae | 0.056083251  | 0.468917493 | 0.928769554 |
| g MGYG-HGUT-03248 | g unidentified                 | -0.024492526 | 0.751936347 | 0.980278684 |
| g UBA10281        | g Verticillium                 | 0.051565463  | 0.505526799 | 0.936546622 |
| g UBA10281        | g unclassified Tremellomycetes | -0.169335757 | 0.027739804 | 0.773194645 |
| g UBA10281        | g Candida                      | -0.130180841 | 0.091607725 | 0.8415005   |
| g UBA10281        | g Cladosporium                 | -0.039633215 | 0.608924713 | 0.951102497 |
| g UBA10281        | g Debaromyces                  | -0.116316776 | 0.132064032 | 0.849249996 |
| g UBA10281        | g Aspergillus                  | -0.022662621 | 0.769931049 | 0.98374619  |
| g UBA10281        | g Kazachstania                 | -0.067533601 | 0.382980644 | 0.905460587 |
| g UBA10281        | g Malassezia                   | 0.129829602  | 0.092493883 | 0.8415005   |
| g UBA10281        | g unclassified Fungi           | 0.004275508  | 0.956003549 | 0.99717368  |
| g UBA10281        | g Fusarium                     | -0.022299269 | 0.773519133 | 0.984510076 |
| g UBA10281        | g Mycosphaerella               | -0.045616517 | 0.555914798 | 0.942564508 |
| g UBA10281        | g Simplicillium                | 0.085187355  | 0.2708011   | 0.882364885 |
| g UBA10281        | g unclassified Cordycipitaceae | -0.023350463 | 0.76315204  | 0.982076388 |
| g UBA10281        | g unidentified                 | 0.104599396  | 0.175922845 | 0.871837921 |
| g CAG-314         | g Verticillium                 | 0.02773939   | 0.72033986  | 0.97164814  |
| g CAG-314         | g unclassified Tremellomycetes | -0.01416973  | 0.854916863 | 0.994526835 |
| g CAG-314         | g Candida                      | 0.004592275  | 0.952747564 | 0.99717368  |
| g CAG-314         | g Cladosporium                 | 0.009619508  | 0.901213648 | 0.995280411 |
| g CAG-314         | g Debaromyces                  | -0.067779891 | 0.381243994 | 0.90490297  |
| g CAG-314         | g Aspergillus                  | -0.081937689 | 0.289569573 | 0.891214772 |
| g CAG-314         | g Kazachstania                 | 0.004293069  | 0.955823026 | 0.99717368  |
| g CAG-314         | g Malassezia                   | -0.014165856 | 0.854956093 | 0.994526835 |
| g CAG-314         | g unclassified Fungi           | -0.07987556  | 0.301919366 | 0.896412022 |
| g CAG-314         | g Fusarium                     | -0.125201219 | 0.104819491 | 0.841929371 |
| g CAG-314         | g Mycosphaerella               | -0.104783338 | 0.175159953 | 0.871655497 |
| g CAG-314         | g Simplicillium                | -0.010209341 | 0.895190072 | 0.995135868 |
| g CAG-314         | g unclassified Cordycipitaceae | -0.057338395 | 0.459010938 | 0.926012938 |
| g CAG-314         | g unidentified                 | -0.031941002 | 0.680151435 | 0.963380777 |
| g UBA11517        | g Verticillium                 | 0.070048168  | 0.36547598  | 0.901117392 |



|                 |                                |              |             |             |
|-----------------|--------------------------------|--------------|-------------|-------------|
| g UBA11517      | g unclassified Tremellomycetes | -0.035642686 | 0.645471539 | 0.955501166 |
| g UBA11517      | g Candida                      | -0.046413019 | 0.549030026 | 0.942564508 |
| g UBA11517      | g Cladosporium                 | 0.039179115  | 0.613037327 | 0.951172976 |
| g UBA11517      | g Debaryomyces                 | -0.044189539 | 0.568352686 | 0.942564508 |
| g UBA11517      | g Aspergillus                  | -0.01266044  | 0.870226525 | 0.994526835 |
| g UBA11517      | g Kazachstania                 | -0.083801687 | 0.278700498 | 0.889320764 |
| g UBA11517      | g Malassezia                   | -0.056522206 | 0.46543966  | 0.927602832 |
| g UBA11517      | g unclassified Fungi           | -0.109155205 | 0.157740736 | 0.855241398 |
| g UBA11517      | g Fusarium                     | -0.129809463 | 0.092544901 | 0.8415005   |
| g UBA11517      | g Mycosphaerella               | 0.034873536  | 0.652617972 | 0.955763754 |
| g UBA11517      | g Simplicillium                | 0.026849643  | 0.728953969 | 0.973108701 |
| g UBA11517      | g unclassified Cordycipitaceae | 0.094718122  | 0.220592958 | 0.874689648 |
| g UBA11517      | g unidentified                 | -0.026831857 | 0.72912652  | 0.973108701 |
| g UBA10677      | g Verticillium                 | -0.067009669 | 0.386690956 | 0.906174944 |
| g UBA10677      | g unclassified Tremellomycetes | -0.017677353 | 0.81955462  | 0.992339735 |
| g UBA10677      | g Candida                      | -0.086400385 | 0.264011867 | 0.878368327 |
| g UBA10677      | g Cladosporium                 | -0.069486799 | 0.369340289 | 0.901117392 |
| g UBA10677      | g Debaryomyces                 | -0.011897445 | 0.877984817 | 0.994526835 |
| g UBA10677      | g Aspergillus                  | 0.012266078  | 0.87423498  | 0.994526835 |
| g UBA10677      | g Kazachstania                 | -0.131455959 | 0.088447359 | 0.8415005   |
| g UBA10677      | g Malassezia                   | -0.003497459 | 0.964003957 | 0.998529304 |
| g UBA10677      | g unclassified Fungi           | -0.04509574  | 0.560438732 | 0.942564508 |
| g UBA10677      | g Fusarium                     | 0.07547387   | 0.329426231 | 0.899729547 |
| g UBA10677      | g Mycosphaerella               | 0.055882706  | 0.47051114  | 0.928769554 |
| g UBA10677      | g Simplicillium                | 0.01695328   | 0.826827145 | 0.993650851 |
| g UBA10677      | g unclassified Cordycipitaceae | -0.011924054 | 0.877714052 | 0.994526835 |
| g UBA10677      | g unidentified                 | 0.017689974  | 0.819427988 | 0.992339735 |
| g CAG-475       | g Verticillium                 | -0.062852206 | 0.416896309 | 0.91665523  |
| g CAG-475       | g unclassified Tremellomycetes | -0.134622409 | 0.080975259 | 0.8415005   |
| g CAG-475       | g Candida                      | -0.096371389 | 0.212605387 | 0.874689648 |
| g CAG-475       | g Cladosporium                 | -0.07250712  | 0.348845671 | 0.900151743 |
| g CAG-475       | g Debaryomyces                 | -0.088868765 | 0.25055821  | 0.874689648 |
| g CAG-475       | g Aspergillus                  | 0.005582145  | 0.942578142 | 0.996925697 |
| g CAG-475       | g Kazachstania                 | -0.050215938 | 0.516744725 | 0.938796978 |
| g CAG-475       | g Malassezia                   | -0.006219903 | 0.936030948 | 0.996251765 |
| g CAG-475       | g unclassified Fungi           | -0.054024155 | 0.48542031  | 0.932872225 |
| g CAG-475       | g Fusarium                     | -0.0252479   | 0.744546422 | 0.978592408 |
| g CAG-475       | g Mycosphaerella               | -0.079092102 | 0.306701125 | 0.897967316 |
| g CAG-475       | g Simplicillium                | 0.03741155   | 0.629159857 | 0.953713015 |
| g CAG-475       | g unclassified Cordycipitaceae | -0.087169282 | 0.259769161 | 0.878368327 |
| g CAG-475       | g unidentified                 | 0.093574006  | 0.226244046 | 0.874689648 |
| g Clostridium   | g Verticillium                 | -0.118994862 | 0.123333219 | 0.849176369 |
| g Clostridium   | g unclassified Tremellomycetes | 0.151636161  | 0.049063975 | 0.832568254 |
| g Clostridium   | g Candida                      | 0.049377674  | 0.5237766   | 0.939740222 |
| g Clostridium   | g Cladosporium                 | 0.051421982  | 0.506713418 | 0.936546622 |
| g Clostridium   | g Debaryomyces                 | 0.10352532   | 0.180426606 | 0.872371283 |
| g Clostridium   | g Aspergillus                  | 0.052114293  | 0.501001273 | 0.936281889 |
| g Clostridium   | g Kazachstania                 | 0.082784299  | 0.284598365 | 0.890975405 |
| g Clostridium   | g Malassezia                   | -0.026370169 | 0.733610188 | 0.973693103 |
| g Clostridium   | g unclassified Fungi           | -0.079046094 | 0.306983466 | 0.897967316 |
| g Clostridium   | g Fusarium                     | -0.083627963 | 0.279701708 | 0.889387397 |
| g Clostridium   | g Mycosphaerella               | -0.060240998 | 0.436552678 | 0.919176572 |
| g Clostridium   | g Simplicillium                | -0.076071423 | 0.325600467 | 0.899370541 |
| g Clostridium   | g unclassified Cordycipitaceae | -0.103906133 | 0.178820188 | 0.872371283 |
| g Clostridium   | g unidentified                 | -0.125890051 | 0.102907283 | 0.841929371 |
| g Clostridium P | g Verticillium                 | -0.122960956 | 0.111232298 | 0.843328451 |
| g Clostridium P | g unclassified Tremellomycetes | 0.107507927  | 0.164144762 | 0.862414337 |
| g Clostridium P | g Candida                      | 0.088267227  | 0.253792268 | 0.874689648 |
| g Clostridium P | g Cladosporium                 | 0.003968159  | 0.959163436 | 0.997919102 |
| g Clostridium P | g Debaryomyces                 | 0.072905007  | 0.346200183 | 0.900151743 |
| g Clostridium P | g Aspergillus                  | 0.09016473   | 0.24368788  | 0.874689648 |
| g Clostridium P | g Kazachstania                 | 0.081066039  | 0.294748006 | 0.892181547 |
| g Clostridium P | g Malassezia                   | -0.094035604 | 0.223951896 | 0.874689648 |
| g Clostridium P | g unclassified Fungi           | 0.018486512  | 0.811445682 | 0.991049439 |
| g Clostridium P | g Fusarium                     | 0.061431842  | 0.427523495 | 0.918239588 |
| g Clostridium P | g Mycosphaerella               | -0.052870773 | 0.494798559 | 0.934004873 |
| g Clostridium P | g Simplicillium                | -0.055551703 | 0.473147945 | 0.928769554 |
| g Clostridium P | g unclassified Cordycipitaceae | -0.097543975 | 0.207067065 | 0.874689648 |
| g Clostridium P | g unidentified                 | -0.010600587 | 0.891197819 | 0.994653074 |
| g Clostridium J | g Verticillium                 | -0.146220513 | 0.057832235 | 0.832568254 |
| g Clostridium J | g unclassified Tremellomycetes | 0.18188654   | 0.01794491  | 0.702895198 |
| g Clostridium J | g Candida                      | 0.068830154  | 0.373892259 | 0.902163371 |
| g Clostridium J | g Cladosporium                 | 0.08135085   | 0.293049233 | 0.892181547 |
| g Clostridium J | g Debaryomyces                 | 0.012338512  | 0.873498489 | 0.994526835 |
| g Clostridium J | g Aspergillus                  | 0.077149667  | 0.318769899 | 0.898536448 |
| g Clostridium J | g Kazachstania                 | 0.076589104  | 0.322309323 | 0.89909104  |
| g Clostridium J | g Malassezia                   | 0.02194655   | 0.777006809 | 0.984510076 |
| g Clostridium J | g unclassified Fungi           | -0.168049647 | 0.028963164 | 0.780931419 |

|                    |                                |              |             |             |
|--------------------|--------------------------------|--------------|-------------|-------------|
| g Clostridium J    | g Fusarium                     | 0.078763423  | 0.308721909 | 0.897967316 |
| g Clostridium J    | g Mycosphaerella               | -0.037653241 | 0.626944716 | 0.952865795 |
| g Clostridium J    | g Simplicillium                | -0.069359682 | 0.370218807 | 0.901117392 |
| g Clostridium J    | g unclassified Cordycipitaceae | -0.057831404 | 0.455151761 | 0.924332119 |
| g Clostridium J    | g unidentified                 | -0.170891573 | 0.026319161 | 0.765986149 |
| g Clostridium X    | g Verticillium                 | -0.067454419 | 0.383539993 | 0.905460587 |
| g Clostridium X    | g unclassified Tremellomycetes | 0.179522387  | 0.019518528 | 0.702895198 |
| g Clostridium X    | g Candida                      | 0.01479631   | 0.848576606 | 0.994526835 |
| g Clostridium X    | g Cladosporium                 | 0.073956432  | 0.339270567 | 0.900151743 |
| g Clostridium X    | g Debaromyces                  | -0.012800634 | 0.86880233  | 0.994526835 |
| g Clostridium X    | g Aspergillus                  | 0.061677519  | 0.425674229 | 0.918239588 |
| g Clostridium X    | g Kazachstania                 | 0.070820538  | 0.360200258 | 0.900151743 |
| g Clostridium X    | g Malassezia                   | 0.001074559  | 0.988937208 | 0.999049974 |
| g Clostridium X    | g unclassified Fungi           | -0.031017739 | 0.68891032  | 0.96434561  |
| g Clostridium X    | g Fusarium                     | -0.042467362 | 0.583536901 | 0.945028002 |
| g Clostridium X    | g Mycosphaerella               | 0.019756056  | 0.798763651 | 0.987463135 |
| g Clostridium X    | g Simplicillium                | -0.01338259  | 0.862894938 | 0.994526835 |
| g Clostridium X    | g unclassified Cordycipitaceae | -0.020928838 | 0.787094698 | 0.986710331 |
| g Clostridium X    | g unidentified                 | -0.051294187 | 0.507771536 | 0.936546622 |
| g Clostridium B    | g Verticillium                 | -0.049545437 | 0.522365415 | 0.939740222 |
| g Clostridium B    | g unclassified Tremellomycetes | 0.095505119  | 0.21676447  | 0.874689648 |
| g Clostridium B    | g Candida                      | -0.057787686 | 0.455493248 | 0.924332119 |
| g Clostridium B    | g Cladosporium                 | 0.050554276  | 0.513920337 | 0.938277062 |
| g Clostridium B    | g Debaromyces                  | 0.006142904  | 0.9368212   | 0.996251765 |
| g Clostridium B    | g Aspergillus                  | 0.100820565  | 0.192142969 | 0.874689648 |
| g Clostridium B    | g Kazachstania                 | 0.091114289  | 0.238737953 | 0.874689648 |
| g Clostridium B    | g Malassezia                   | 0.0244016    | 0.75282743  | 0.980305754 |
| g Clostridium B    | g unclassified Fungi           | -0.006782537 | 0.930258517 | 0.996251765 |
| g Clostridium B    | g Fusarium                     | -0.123305014 | 0.110227944 | 0.843328451 |
| g Clostridium B    | g Mycosphaerella               | 0.003477826  | 0.964205889 | 0.998625698 |
| g Clostridium B    | g Simplicillium                | 0.054083139  | 0.484943282 | 0.932872225 |
| g Clostridium B    | g unclassified Cordycipitaceae | -0.050416582 | 0.515068823 | 0.938796978 |
| g Clostridium B    | g unidentified                 | 0.013322981  | 0.863499682 | 0.994526835 |
| g MGYG-HGUT-02719  | g Verticillium                 | 0.008353916  | 0.914156894 | 0.996251765 |
| g MGYG-HGUT-02719  | g unclassified Tremellomycetes | 0.060658874  | 0.433371937 | 0.918239588 |
| g MGYG-HGUT-02719  | g Candida                      | -0.134091616 | 0.082191116 | 0.8415005   |
| g MGYG-HGUT-02719  | g Cladosporium                 | 0.014000103  | 0.856634913 | 0.994526835 |
| g MGYG-HGUT-02719  | g Debaromyces                  | -0.117290236 | 0.128837148 | 0.849249996 |
| g MGYG-HGUT-02719  | g Aspergillus                  | -0.077455396 | 0.316850177 | 0.898525398 |
| g MGYG-HGUT-02719  | g Kazachstania                 | 0.015955942  | 0.836868342 | 0.994526835 |
| g MGYG-HGUT-02719  | g Malassezia                   | 0.092248024  | 0.232920573 | 0.874689648 |
| g MGYG-HGUT-02719  | g unclassified Fungi           | -0.044915084 | 0.562012197 | 0.942564508 |
| g MGYG-HGUT-02719  | g Fusarium                     | -0.041186098 | 0.59495374  | 0.947273049 |
| g MGYG-HGUT-02719  | g Mycosphaerella               | -0.00501854  | 0.948367296 | 0.996925697 |
| g MGYG-HGUT-02719  | g Simplicillium                | 0.179533107  | 0.019511132 | 0.702895198 |
| g MGYG-HGUT-02719  | g unclassified Cordycipitaceae | 0.007342502  | 0.924517078 | 0.996251765 |
| g MGYG-HGUT-02719  | g unidentified                 | 0.056358934  | 0.466731599 | 0.928031408 |
| g Sporanaerobacter | g Verticillium                 | 0.044186804  | 0.568376648 | 0.942564508 |
| g Sporanaerobacter | g unclassified Tremellomycetes | 0.125940861  | 0.102767329 | 0.841929371 |
| g Sporanaerobacter | g Candida                      | 0.000270882  | 0.997211139 | 0.999334917 |
| g Sporanaerobacter | g Cladosporium                 | -0.059822875 | 0.439748601 | 0.91979111  |
| g Sporanaerobacter | g Debaromyces                  | -0.037589347 | 0.627529993 | 0.95290209  |
| g Sporanaerobacter | g Aspergillus                  | -0.014168822 | 0.854926062 | 0.994526835 |
| g Sporanaerobacter | g Kazachstania                 | -0.02304473  | 0.766162993 | 0.982494893 |
| g Sporanaerobacter | g Malassezia                   | -0.056228059 | 0.467768608 | 0.928769554 |
| g Sporanaerobacter | g unclassified Fungi           | -0.155082026 | 0.044082987 | 0.817455693 |
| g Sporanaerobacter | g Fusarium                     | -0.083510235 | 0.280381575 | 0.890167523 |
| g Sporanaerobacter | g Mycosphaerella               | 0.013320012  | 0.863529804 | 0.994526835 |
| g Sporanaerobacter | g Simplicillium                | -0.022307372 | 0.773439061 | 0.984510076 |
| g Sporanaerobacter | g unclassified Cordycipitaceae | 0.122790302  | 0.111733109 | 0.843328451 |
| g Sporanaerobacter | g unidentified                 | -0.10089839  | 0.191798282 | 0.874689648 |
| g Anaerococcus     | g Verticillium                 | -0.117615836 | 0.127771485 | 0.849249996 |
| g Anaerococcus     | g unclassified Tremellomycetes | 0.097805315  | 0.205846984 | 0.874689648 |
| g Anaerococcus     | g Candida                      | -0.038066936 | 0.623160867 | 0.952309753 |
| g Anaerococcus     | g Cladosporium                 | -0.072268347 | 0.350439328 | 0.900151743 |
| g Anaerococcus     | g Debaromyces                  | -0.04334926  | 0.57573791  | 0.943473883 |
| g Anaerococcus     | g Aspergillus                  | 0.001023441  | 0.989463454 | 0.999049974 |
| g Anaerococcus     | g Kazachstania                 | 0.046165099  | 0.551168508 | 0.942564508 |
| g Anaerococcus     | g Malassezia                   | -0.116151006 | 0.132619666 | 0.849249996 |
| g Anaerococcus     | g unclassified Fungi           | -0.216424018 | 0.004710296 | 0.613926619 |
| g Anaerococcus     | g Fusarium                     | -0.123328328 | 0.110160147 | 0.843328451 |
| g Anaerococcus     | g Mycosphaerella               | -0.03134694  | 0.685782413 | 0.963892039 |
| g Anaerococcus     | g Simplicillium                | -0.041732804 | 0.59006989  | 0.947252808 |
| g Anaerococcus     | g unclassified Cordycipitaceae | -0.010601281 | 0.89119074  | 0.994653074 |
| g Anaerococcus     | g unidentified                 | -0.053458383 | 0.490008692 | 0.932872225 |
| g Parvimonas       | g Verticillium                 | 0.015810441  | 0.83833549  | 0.994526835 |
| g Parvimonas       | g unclassified Tremellomycetes | 0.192730813  | 0.012056444 | 0.659702633 |
| g Parvimonas       | g Candida                      | 0.056432695  | 0.4661477   | 0.927602832 |

|                   |                                |              |             |             |
|-------------------|--------------------------------|--------------|-------------|-------------|
| g Parvimonas      | g Cladosporium                 | 0.179955732  | 0.019221451 | 0.702895198 |
| g Parvimonas      | g Debaryomyces                 | -0.102149079 | 0.186320695 | 0.873641816 |
| g Parvimonas      | g Aspergillus                  | 0.118107196  | 0.126176186 | 0.849249996 |
| g Parvimonas      | g Kazachstania                 | 0.157272698  | 0.041141882 | 0.808354944 |
| g Parvimonas      | g Malassezia                   | 0.007520396  | 0.922693887 | 0.996251765 |
| g Parvimonas      | g unclassified Fungi           | -0.17172871  | 0.02558087  | 0.765986149 |
| g Parvimonas      | g Fusarium                     | -0.112610159 | 0.144921059 | 0.849249996 |
| g Parvimonas      | g Mycosphaerella               | -0.018262694 | 0.813686694 | 0.991049439 |
| g Parvimonas      | g Simplicillium                | 0.105852759  | 0.170772982 | 0.867877301 |
| g Parvimonas      | g unclassified Cordycipitaceae | 0.085080827  | 0.27140294  | 0.883543941 |
| g Parvimonas      | g unidentified                 | -0.204166594 | 0.007754577 | 0.613926619 |
| g Ezakiella       | g Verticillium                 | 0.028649727  | 0.711562682 | 0.968842577 |
| g Ezakiella       | g unclassified Tremellomycetes | 0.120064423  | 0.119973824 | 0.849176369 |
| g Ezakiella       | g Candida                      | 0.001128078  | 0.988386262 | 0.999049974 |
| g Ezakiella       | g Cladosporium                 | 0.093515521  | 0.226535646 | 0.874689648 |
| g Ezakiella       | g Debaryomyces                 | -0.166723362 | 0.030272646 | 0.785763434 |
| g Ezakiella       | g Aspergillus                  | -0.049204622 | 0.525234293 | 0.939740222 |
| g Ezakiella       | g Kazachstania                 | -0.018872962 | 0.807579912 | 0.989341319 |
| g Ezakiella       | g Malassezia                   | -0.025087832 | 0.746110465 | 0.979082173 |
| g Ezakiella       | g unclassified Fungi           | -0.184242468 | 0.01648752  | 0.702895198 |
| g Ezakiella       | g Fusarium                     | -0.027875967 | 0.719020668 | 0.970812911 |
| g Ezakiella       | g Mycosphaerella               | -0.057570852 | 0.457189052 | 0.924332119 |
| g Ezakiella       | g Simplicillium                | 0.044247335  | 0.56784637  | 0.942564508 |
| g Ezakiella       | g unclassified Cordycipitaceae | 0.106173041  | 0.169475133 | 0.865473868 |
| g Ezakiella       | g unidentified                 | -0.118708742 | 0.124244122 | 0.849176369 |
| g Peptoniphilus A | g Verticillium                 | -0.039531915 | 0.609841091 | 0.951116337 |
| g Peptoniphilus A | g unclassified Tremellomycetes | 0.061493955  | 0.427055517 | 0.918239588 |
| g Peptoniphilus A | g Candida                      | 0.042557594  | 0.582736703 | 0.944873255 |
| g Peptoniphilus A | g Cladosporium                 | 0.004617374  | 0.952489607 | 0.99717368  |
| g Peptoniphilus A | g Debaryomyces                 | -0.139132392 | 0.071218427 | 0.8415005   |
| g Peptoniphilus A | g Aspergillus                  | 0.116127181  | 0.132699674 | 0.849249996 |
| g Peptoniphilus A | g Kazachstania                 | 0.073280971  | 0.34371213  | 0.900151743 |
| g Peptoniphilus A | g Malassezia                   | -0.065038013 | 0.400847243 | 0.910666503 |
| g Peptoniphilus A | g unclassified Fungi           | 0.060031774  | 0.438150221 | 0.919726905 |
| g Peptoniphilus A | g Fusarium                     | -0.009759677 | 0.89978167  | 0.995280411 |
| g Peptoniphilus A | g Mycosphaerella               | 0.049427704  | 0.523355556 | 0.939740222 |
| g Peptoniphilus A | g Simplicillium                | -0.099148733 | 0.199656789 | 0.874689648 |
| g Peptoniphilus A | g unclassified Cordycipitaceae | -0.092243208 | 0.232945067 | 0.874689648 |
| g Peptoniphilus A | g unidentified                 | -0.016009357 | 0.836329866 | 0.994526835 |
| g MGYG-HGUT-00373 | g Verticillium                 | 0.069018882  | 0.37258046  | 0.901117392 |
| g MGYG-HGUT-00373 | g unclassified Tremellomycetes | -0.101669732 | 0.18840637  | 0.873641816 |
| g MGYG-HGUT-00373 | g Candida                      | -0.023015765 | 0.766448435 | 0.982494893 |
| g MGYG-HGUT-00373 | g Cladosporium                 | -0.002800579 | 0.971172811 | 0.998625698 |
| g MGYG-HGUT-00373 | g Debaryomyces                 | -0.044028505 | 0.569764531 | 0.942564508 |
| g MGYG-HGUT-00373 | g Aspergillus                  | 0.011313919  | 0.883926104 | 0.994526835 |
| g MGYG-HGUT-00373 | g Kazachstania                 | -0.022187601 | 0.774622815 | 0.984510076 |
| g MGYG-HGUT-00373 | g Malassezia                   | 0.045547437  | 0.556513876 | 0.942564508 |
| g MGYG-HGUT-00373 | g unclassified Fungi           | 0.027730472  | 0.720426033 | 0.97164814  |
| g MGYG-HGUT-00373 | g Fusarium                     | -0.04475924  | 0.56337124  | 0.942564508 |
| g MGYG-HGUT-00373 | g Mycosphaerella               | -0.095178404 | 0.218348042 | 0.874689648 |
| g MGYG-HGUT-00373 | g Simplicillium                | 0.086379795  | 0.26412613  | 0.878368327 |
| g MGYG-HGUT-00373 | g unclassified Cordycipitaceae | 0.004507245  | 0.95362149  | 0.99717368  |
| g MGYG-HGUT-00373 | g unidentified                 | 0.163355064  | 0.033826742 | 0.808354944 |
| g MGYG-HGUT-01673 | g Verticillium                 | 0.054840474  | 0.478840828 | 0.931740764 |
| g MGYG-HGUT-01673 | g unclassified Tremellomycetes | -0.040260691 | 0.603262004 | 0.950399198 |
| g MGYG-HGUT-01673 | g Candida                      | -0.105741473 | 0.171225661 | 0.867877301 |
| g MGYG-HGUT-01673 | g Cladosporium                 | 0.04228781   | 0.585130708 | 0.945928844 |
| g MGYG-HGUT-01673 | g Debaryomyces                 | -0.129715109 | 0.092784215 | 0.8415005   |
| g MGYG-HGUT-01673 | g Aspergillus                  | 0.133975543  | 0.082458942 | 0.8415005   |
| g MGYG-HGUT-01673 | g Kazachstania                 | 0.035408819  | 0.647641091 | 0.955501166 |
| g MGYG-HGUT-01673 | g Malassezia                   | -0.06891677  | 0.37328986  | 0.901327467 |
| g MGYG-HGUT-01673 | g unclassified Fungi           | 0.056999258  | 0.461676149 | 0.927602832 |
| g MGYG-HGUT-01673 | g Fusarium                     | -0.099930717 | 0.196116208 | 0.874689648 |
| g MGYG-HGUT-01673 | g Mycosphaerella               | -0.046072607 | 0.551967362 | 0.942564508 |
| g MGYG-HGUT-01673 | g Simplicillium                | 0.078908527  | 0.307828708 | 0.897967316 |
| g MGYG-HGUT-01673 | g unclassified Cordycipitaceae | 0.021057151  | 0.785820831 | 0.986710331 |
| g MGYG-HGUT-01673 | g unidentified                 | 0.144529579  | 0.060820836 | 0.832568254 |
| g MGYG-HGUT-00728 | g Verticillium                 | -0.01532972  | 0.843186735 | 0.994526835 |
| g MGYG-HGUT-00728 | g unclassified Tremellomycetes | 0.000611552  | 0.993703818 | 0.999049974 |
| g MGYG-HGUT-00728 | g Candida                      | -0.025106013 | 0.745932768 | 0.979082173 |
| g MGYG-HGUT-00728 | g Cladosporium                 | 0.078344978  | 0.311307187 | 0.897967316 |
| g MGYG-HGUT-00728 | g Debaryomyces                 | -0.112917199 | 0.143821221 | 0.849249996 |
| g MGYG-HGUT-00728 | g Aspergillus                  | 0.081188868  | 0.294014583 | 0.892181547 |
| g MGYG-HGUT-00728 | g Kazachstania                 | -0.053120415 | 0.492760597 | 0.933370788 |
| g MGYG-HGUT-00728 | g Malassezia                   | 0.014303044  | 0.853567087 | 0.994526835 |
| g MGYG-HGUT-00728 | g unclassified Fungi           | 0.011290312  | 0.884166606 | 0.994526835 |
| g MGYG-HGUT-00728 | g Fusarium                     | -0.035490417 | 0.646883774 | 0.955501166 |
| g MGYG-HGUT-00728 | g Mycosphaerella               | -0.043292928 | 0.576234618 | 0.943618965 |

|                   |                                       |              |             |             |
|-------------------|---------------------------------------|--------------|-------------|-------------|
| g MGYG-HGUT-00728 | g <i>Simplicillium</i>                | 0.080486686  | 0.298223736 | 0.892181547 |
| g MGYG-HGUT-00728 | g unclassified <i>Cordycipitaceae</i> | 0.066047184  | 0.393563351 | 0.907694413 |
| g MGYG-HGUT-00728 | g unidentified                        | 0.057257495  | 0.459645942 | 0.926927531 |
| g Eubacterium     | g <i>Verticillium</i>                 | 0.060176073  | 0.437048067 | 0.919176572 |
| g Eubacterium     | g unclassified <i>Tremellomycetes</i> | 0.014042859  | 0.856201801 | 0.994526835 |
| g Eubacterium     | g <i>Candida</i>                      | -0.045915999 | 0.553321256 | 0.942564508 |
| g Eubacterium     | g <i>Cladosporium</i>                 | 0.032046354  | 0.679154656 | 0.962963695 |
| g Eubacterium     | g <i>Debaromyces</i>                  | -0.111565506 | 0.148710931 | 0.849249996 |
| g Eubacterium     | g <i>Aspergillus</i>                  | 0.053780813  | 0.487390972 | 0.932872225 |
| g Eubacterium     | g <i>Kazachstania</i>                 | -0.051235973 | 0.508253914 | 0.936546622 |
| g Eubacterium     | g <i>Malassezia</i>                   | -0.032002954 | 0.67956521  | 0.963213178 |
| g Eubacterium     | g unclassified <i>Fungi</i>           | -0.006402731 | 0.934154813 | 0.996251765 |
| g Eubacterium     | g <i>Fusarium</i>                     | -0.136184447 | 0.077480952 | 0.8415005   |
| g Eubacterium     | g <i>Mycosphaerella</i>               | -0.054492445 | 0.481640003 | 0.932872225 |
| g Eubacterium     | g <i>Simplicillium</i>                | 0.007368824  | 0.924247282 | 0.996251765 |
| g Eubacterium     | g unclassified <i>Cordycipitaceae</i> | 0.104802335  | 0.175081305 | 0.871655497 |
| g Eubacterium     | g unidentified                        | -0.031662782 | 0.682786443 | 0.963892039 |
| g Anaerofustis    | g <i>Verticillium</i>                 | 0.002995209  | 0.969170377 | 0.998625698 |
| g Anaerofustis    | g unclassified <i>Tremellomycetes</i> | 0.155591745  | 0.04338341  | 0.815183992 |
| g Anaerofustis    | g <i>Candida</i>                      | -0.012519652 | 0.871657178 | 0.994526835 |
| g Anaerofustis    | g <i>Cladosporium</i>                 | 0.119074032  | 0.123082085 | 0.849176369 |
| g Anaerofustis    | g <i>Debaromyces</i>                  | -0.050320733 | 0.515869067 | 0.938796978 |
| g Anaerofustis    | g <i>Aspergillus</i>                  | 0.061577947  | 0.426423173 | 0.918239588 |
| g Anaerofustis    | g <i>Kazachstania</i>                 | 0.084243353  | 0.27616596  | 0.888419029 |
| g Anaerofustis    | g <i>Malassezia</i>                   | 0.03831881   | 0.620861919 | 0.952309753 |
| g Anaerofustis    | g unclassified <i>Fungi</i>           | -0.090917572 | 0.239757596 | 0.874689648 |
| g Anaerofustis    | g <i>Fusarium</i>                     | -0.068577362 | 0.375653784 | 0.903077197 |
| g Anaerofustis    | g <i>Mycosphaerella</i>               | 0.044116458  | 0.568993205 | 0.942564508 |
| g Anaerofustis    | g <i>Simplicillium</i>                | 0.017853906  | 0.817783641 | 0.991841934 |
| g Anaerofustis    | g unclassified <i>Cordycipitaceae</i> | -0.005973455 | 0.938560487 | 0.996251765 |
| g Anaerofustis    | g unidentified                        | -0.091427149 | 0.237122561 | 0.874689648 |
| g MGYG-HGUT-01671 | g <i>Verticillium</i>                 | -0.00754979  | 0.922392675 | 0.996251765 |
| g MGYG-HGUT-01671 | g unclassified <i>Tremellomycetes</i> | -0.03007993  | 0.697849699 | 0.967320417 |
| g MGYG-HGUT-01671 | g <i>Candida</i>                      | -0.051337213 | 0.507415156 | 0.936546622 |
| g MGYG-HGUT-01671 | g <i>Cladosporium</i>                 | -0.009636384 | 0.901041222 | 0.995280411 |
| g MGYG-HGUT-01671 | g <i>Debaromyces</i>                  | 0.025955699  | 0.73764299  | 0.976257958 |
| g MGYG-HGUT-01671 | g <i>Aspergillus</i>                  | 0.068014274  | 0.379595766 | 0.90490297  |
| g MGYG-HGUT-01671 | g <i>Kazachstania</i>                 | 0.048132441  | 0.534311395 | 0.940891392 |
| g MGYG-HGUT-01671 | g <i>Malassezia</i>                   | 0.106587013  | 0.167808506 | 0.864987015 |
| g MGYG-HGUT-01671 | g unclassified <i>Fungi</i>           | -0.049634439 | 0.521617539 | 0.939740222 |
| g MGYG-HGUT-01671 | g <i>Fusarium</i>                     | -0.0737355   | 0.340719294 | 0.900151743 |
| g MGYG-HGUT-01671 | g <i>Mycosphaerella</i>               | 0.0188297    | 0.80801244  | 0.989341319 |
| g MGYG-HGUT-01671 | g <i>Simplicillium</i>                | 0.002324657  | 0.976070012 | 0.998625698 |
| g MGYG-HGUT-01671 | g unclassified <i>Cordycipitaceae</i> | 0.050891996  | 0.511109061 | 0.937903764 |
| g MGYG-HGUT-01671 | g unidentified                        | -0.063739255 | 0.410338453 | 0.913116876 |
| g MGYG-HGUT-03766 | g <i>Verticillium</i>                 | 0.086334522  | 0.264377483 | 0.878368327 |
| g MGYG-HGUT-03766 | g unclassified <i>Tremellomycetes</i> | 0.010163237  | 0.895660687 | 0.995135868 |
| g MGYG-HGUT-03766 | g <i>Candida</i>                      | -0.100827273 | 0.192113239 | 0.874689648 |
| g MGYG-HGUT-03766 | g <i>Cladosporium</i>                 | 0.130814431  | 0.090026317 | 0.8415005   |
| g MGYG-HGUT-03766 | g <i>Debaromyces</i>                  | -0.083594539 | 0.279894616 | 0.889387397 |
| g MGYG-HGUT-03766 | g <i>Aspergillus</i>                  | -0.06871749  | 0.374676707 | 0.902314617 |
| g MGYG-HGUT-03766 | g <i>Kazachstania</i>                 | 0.135603157  | 0.078766809 | 0.8415005   |
| g MGYG-HGUT-03766 | g <i>Malassezia</i>                   | -0.02636777  | 0.733633505 | 0.973693103 |
| g MGYG-HGUT-03766 | g unclassified <i>Fungi</i>           | 0.089604447  | 0.246641858 | 0.874689648 |
| g MGYG-HGUT-03766 | g <i>Fusarium</i>                     | -0.021924024 | 0.777229703 | 0.984583447 |
| g MGYG-HGUT-03766 | g <i>Mycosphaerella</i>               | -0.002704752 | 0.972158782 | 0.998625698 |
| g MGYG-HGUT-03766 | g <i>Simplicillium</i>                | 0.030578409  | 0.693092837 | 0.966086731 |
| g MGYG-HGUT-03766 | g unclassified <i>Cordycipitaceae</i> | 0.019321228  | 0.803101602 | 0.988396129 |
| g MGYG-HGUT-03766 | g unidentified                        | 0.01040435   | 0.893199877 | 0.994768477 |
| g Escherichia     | g <i>Verticillium</i>                 | 0.01394802   | 0.857162558 | 0.994526835 |
| g Escherichia     | g unclassified <i>Tremellomycetes</i> | 0.18467994   | 0.016228548 | 0.702895198 |
| g Escherichia     | g <i>Candida</i>                      | -0.014969221 | 0.846828634 | 0.994526835 |
| g Escherichia     | g <i>Cladosporium</i>                 | -0.056515954 | 0.465489096 | 0.927602832 |
| g Escherichia     | g <i>Debaromyces</i>                  | 0.090667929  | 0.241055943 | 0.874689648 |
| g Escherichia     | g <i>Aspergillus</i>                  | 0.052652757  | 0.496581989 | 0.935069491 |
| g Escherichia     | g <i>Kazachstania</i>                 | 0.101571369  | 0.188836459 | 0.873641816 |
| g Escherichia     | g <i>Malassezia</i>                   | 0.071112794  | 0.358216405 | 0.900151743 |
| g Escherichia     | g unclassified <i>Fungi</i>           | 0.07872609   | 0.308951992 | 0.897967316 |
| g Escherichia     | g <i>Fusarium</i>                     | -0.014336808 | 0.853225304 | 0.994526835 |
| g Escherichia     | g <i>Mycosphaerella</i>               | -0.108098458 | 0.161827035 | 0.859887758 |
| g Escherichia     | g <i>Simplicillium</i>                | 0.0169222    | 0.827139635 | 0.993650851 |
| g Escherichia     | g unclassified <i>Cordycipitaceae</i> | -0.040793337 | 0.598473606 | 0.948266952 |
| g Escherichia     | g unidentified                        | -0.071996954 | 0.352256246 | 0.900151743 |
| g Klebsiella      | g <i>Verticillium</i>                 | -0.111909769 | 0.147453791 | 0.849249996 |
| g Klebsiella      | g unclassified <i>Tremellomycetes</i> | 0.098325968  | 0.203431724 | 0.874689648 |
| g Klebsiella      | g <i>Candida</i>                      | 0.014050942  | 0.856119922 | 0.994526835 |
| g Klebsiella      | g <i>Cladosporium</i>                 | -0.106311603 | 0.168915926 | 0.864987015 |
| g Klebsiella      | g <i>Debaromyces</i>                  | -0.033213477 | 0.668149578 | 0.960389755 |



|                 |                                |              |             |             |
|-----------------|--------------------------------|--------------|-------------|-------------|
| g Klebsiella    | g Aspergillus                  | -0.076996074 | 0.319737173 | 0.898536448 |
| g Klebsiella    | g Kazachstania                 | 0.080638563  | 0.297309963 | 0.892181547 |
| g Klebsiella    | g Malassezia                   | -0.103220784 | 0.18171888  | 0.872371283 |
| g Klebsiella    | g unclassified Fungi           | -0.057491617 | 0.457809604 | 0.925044111 |
| g Klebsiella    | g Fusarium                     | 0.011799087  | 0.878985797 | 0.994526835 |
| g Klebsiella    | g Mycosphaerella               | -0.035516055 | 0.646645909 | 0.955501166 |
| g Klebsiella    | g Simplicillium                | -0.01109953  | 0.886110598 | 0.994526835 |
| g Klebsiella    | g unclassified Cordycipitaceae | -0.2355119   | 0.002053329 | 0.550026842 |
| g Klebsiella    | g unidentified                 | 0.081424233  | 0.292612598 | 0.892181547 |
| g Enterobacter  | g Verticillium                 | -0.066989716 | 0.386832687 | 0.906276885 |
| g Enterobacter  | g unclassified Tremellomycetes | 0.078106674  | 0.312785807 | 0.898306    |
| g Enterobacter  | g Candida                      | 0.021762119  | 0.778832249 | 0.985246269 |
| g Enterobacter  | g Cladosporium                 | -0.086149415 | 0.265406893 | 0.878368327 |
| g Enterobacter  | g Debaryomyces                 | 0.035782901  | 0.644172218 | 0.955501166 |
| g Enterobacter  | g Aspergillus                  | -0.028157667 | 0.716302353 | 0.97067915  |
| g Enterobacter  | g Kazachstania                 | 0.039825937  | 0.607182982 | 0.950933357 |
| g Enterobacter  | g Malassezia                   | -0.065473697 | 0.397692812 | 0.909588897 |
| g Enterobacter  | g unclassified Fungi           | 0.023010938  | 0.766496002 | 0.982494893 |
| g Enterobacter  | g Fusarium                     | -0.049422971 | 0.523395378 | 0.939740222 |
| g Enterobacter  | g Mycosphaerella               | -0.029689906 | 0.70157984  | 0.967505184 |
| g Enterobacter  | g Simplicillium                | -0.010415904 | 0.893081983 | 0.994757258 |
| g Enterobacter  | g unclassified Cordycipitaceae | -0.168001276 | 0.029010059 | 0.780931419 |
| g Enterobacter  | g unidentified                 | 0.072810293  | 0.346828771 | 0.900151743 |
| g Citrobacter   | g Verticillium                 | -0.033349022 | 0.666876007 | 0.959868552 |
| g Citrobacter   | g unclassified Tremellomycetes | 0.142865548  | 0.063884537 | 0.836026573 |
| g Citrobacter   | g Candida                      | -0.068419116 | 0.376759068 | 0.903790734 |
| g Citrobacter   | g Cladosporium                 | -0.132241269 | 0.086544719 | 0.8415005   |
| g Citrobacter   | g Debaryomyces                 | 0.080436524  | 0.298525945 | 0.892181547 |
| g Citrobacter   | g Aspergillus                  | -0.032914749 | 0.67095975  | 0.96129685  |
| g Citrobacter   | g Kazachstania                 | 0.060722672  | 0.4328875   | 0.918239588 |
| g Citrobacter   | g Malassezia                   | -0.050273221 | 0.516265979 | 0.938796978 |
| g Citrobacter   | g unclassified Fungi           | -0.006642347 | 0.931696486 | 0.996251765 |
| g Citrobacter   | g Fusarium                     | -0.02969431  | 0.701537684 | 0.967505184 |
| g Citrobacter   | g Mycosphaerella               | -0.097922275 | 0.205300416 | 0.874689648 |
| g Citrobacter   | g Simplicillium                | -0.030956465 | 0.689493098 | 0.96434561  |
| g Citrobacter   | g unclassified Cordycipitaceae | -0.145060674 | 0.059868803 | 0.832568254 |
| g Citrobacter   | g unidentified                 | -0.036052109 | 0.641680584 | 0.955341199 |
| g Klebsiella A  | g Verticillium                 | -0.09687145  | 0.210230685 | 0.874689648 |
| g Klebsiella A  | g unclassified Tremellomycetes | 0.056669618  | 0.464274913 | 0.927602832 |
| g Klebsiella A  | g Candida                      | -0.046797153 | 0.545724625 | 0.942564508 |
| g Klebsiella A  | g Cladosporium                 | -0.100221134 | 0.194812969 | 0.874689648 |
| g Klebsiella A  | g Debaryomyces                 | -0.001374323 | 0.985851374 | 0.999049974 |
| g Klebsiella A  | g Aspergillus                  | -0.028131377 | 0.716555898 | 0.97067915  |
| g Klebsiella A  | g Kazachstania                 | 0.041165967  | 0.595133923 | 0.947273049 |
| g Klebsiella A  | g Malassezia                   | -0.06505231  | 0.400743495 | 0.910655045 |
| g Klebsiella A  | g unclassified Fungi           | -0.053329931 | 0.491053647 | 0.932872225 |
| g Klebsiella A  | g Fusarium                     | -0.004982978 | 0.948732671 | 0.996925697 |
| g Klebsiella A  | g Mycosphaerella               | -0.108339975 | 0.160886211 | 0.859887758 |
| g Klebsiella A  | g Simplicillium                | -0.033418345 | 0.666225017 | 0.959776195 |
| g Klebsiella A  | g unclassified Cordycipitaceae | -0.215438296 | 0.004907828 | 0.613926619 |
| g Klebsiella A  | g unidentified                 | 0.015411937  | 0.842356606 | 0.994526835 |
| g Citrobacter A | g Verticillium                 | -0.020457366 | 0.791780225 | 0.986710331 |
| g Citrobacter A | g unclassified Tremellomycetes | 0.129525723  | 0.093266047 | 0.8415005   |
| g Citrobacter A | g Candida                      | -0.017505255 | 0.821281786 | 0.992484281 |
| g Citrobacter A | g Cladosporium                 | -0.119393778 | 0.122071849 | 0.849176369 |
| g Citrobacter A | g Debaryomyces                 | 0.06910063   | 0.372013123 | 0.901117392 |
| g Citrobacter A | g Aspergillus                  | 0.028620958  | 0.711839492 | 0.968933484 |
| g Citrobacter A | g Kazachstania                 | 0.050973466  | 0.510432083 | 0.937163462 |
| g Citrobacter A | g Malassezia                   | -0.002265926 | 0.976674414 | 0.998625698 |
| g Citrobacter A | g unclassified Fungi           | -0.034303586 | 0.657934084 | 0.956779893 |
| g Citrobacter A | g Fusarium                     | 0.023801556  | 0.758716023 | 0.982030587 |
| g Citrobacter A | g Mycosphaerella               | -0.136868409 | 0.075989733 | 0.8415005   |
| g Citrobacter A | g Simplicillium                | 0.025781341  | 0.739341646 | 0.977217936 |
| g Citrobacter A | g unclassified Cordycipitaceae | -0.130723016 | 0.090253131 | 0.8415005   |
| g Citrobacter A | g unidentified                 | -0.012258281 | 0.874314272 | 0.994526835 |
| g Kluyvera      | g Verticillium                 | -0.053085938 | 0.493041779 | 0.933370788 |
| g Kluyvera      | g unclassified Tremellomycetes | 0.142575465  | 0.06443133  | 0.836350979 |
| g Kluyvera      | g Candida                      | -0.053151461 | 0.492507457 | 0.933370788 |
| g Kluyvera      | g Cladosporium                 | -0.124374034 | 0.107152586 | 0.843328451 |
| g Kluyvera      | g Debaryomyces                 | 0.060887739  | 0.431635534 | 0.918239588 |
| g Kluyvera      | g Aspergillus                  | 0.003859755  | 0.960278104 | 0.997919102 |
| g Kluyvera      | g Kazachstania                 | 0.049999538  | 0.518555372 | 0.939250598 |
| g Kluyvera      | g Malassezia                   | -0.051415975 | 0.506763129 | 0.936546622 |
| g Kluyvera      | g unclassified Fungi           | 0.044076803  | 0.569340908 | 0.942564508 |
| g Kluyvera      | g Fusarium                     | 0.001849694  | 0.980958237 | 0.998625698 |
| g Kluyvera      | g Mycosphaerella               | -0.097853365 | 0.205623222 | 0.874689648 |
| g Kluyvera      | g Simplicillium                | -0.002278781 | 0.976542125 | 0.998625698 |
| g Kluyvera      | g unclassified Cordycipitaceae | -0.166774804 | 0.030220931 | 0.785763434 |

|                 |                                |              |             |             |
|-----------------|--------------------------------|--------------|-------------|-------------|
| g Kluyvera      | g unidentified                 | 0.035300236  | 0.648649407 | 0.955501166 |
| g Raoultella    | g Verticillium                 | -0.064539355 | 0.404475838 | 0.912338681 |
| g Raoultella    | g unclassified Tremellomycetes | 0.098152266  | 0.204235227 | 0.874689648 |
| g Raoultella    | g Candida                      | -0.000874319 | 0.990998626 | 0.999049974 |
| g Raoultella    | g Cladosporium                 | -0.048432434 | 0.531763762 | 0.940412658 |
| g Raoultella    | g Debaromyces                  | 0.03020028   | 0.696700147 | 0.967127531 |
| g Raoultella    | g Aspergillus                  | -0.000556234 | 0.994273336 | 0.999049974 |
| g Raoultella    | g Kazachstania                 | 0.026756245  | 0.729860198 | 0.973325332 |
| g Raoultella    | g Malassezia                   | -0.009742585 | 0.899956261 | 0.995280411 |
| g Raoultella    | g unclassified Fungi           | -0.008568353 | 0.911962166 | 0.996251765 |
| g Raoultella    | g Fusarium                     | 0.013958688  | 0.857054475 | 0.994526835 |
| g Raoultella    | g Mycosphaerella               | -0.029279703 | 0.705510677 | 0.96759945  |
| g Raoultella    | g Simplicillium                | 0.032536815  | 0.674521558 | 0.961701261 |
| g Raoultella    | g unclassified Cordycipitaceae | -0.14397999  | 0.061819075 | 0.832568254 |
| g Raoultella    | g unidentified                 | 0.028987141  | 0.708318975 | 0.968657831 |
| g Metakosakonia | g Verticillium                 | -0.091140972 | 0.238599881 | 0.874689648 |
| g Metakosakonia | g unclassified Tremellomycetes | 0.106100764  | 0.169767372 | 0.865822984 |
| g Metakosakonia | g Candida                      | -0.074608684 | 0.335016407 | 0.900151743 |
| g Metakosakonia | g Cladosporium                 | -0.144115269 | 0.061572124 | 0.832568254 |
| g Metakosakonia | g Debaromyces                  | 0.031354048  | 0.685714927 | 0.963892039 |
| g Metakosakonia | g Aspergillus                  | -0.021801443 | 0.778442924 | 0.985038324 |
| g Metakosakonia | g Kazachstania                 | 0.067280335  | 0.384771482 | 0.906174944 |
| g Metakosakonia | g Malassezia                   | -0.059030071 | 0.44584478  | 0.921010267 |
| g Metakosakonia | g unclassified Fungi           | 0.010335431  | 0.893903162 | 0.995135868 |
| g Metakosakonia | g Fusarium                     | 0.012255542  | 0.874342124 | 0.994526835 |
| g Metakosakonia | g Mycosphaerella               | -0.146956488 | 0.056569778 | 0.832568254 |
| g Metakosakonia | g Simplicillium                | -0.044721863 | 0.563697425 | 0.942564508 |
| g Metakosakonia | g unclassified Cordycipitaceae | -0.212663888 | 0.005504263 | 0.613926619 |
| g Metakosakonia | g unidentified                 | 0.015639943  | 0.840055401 | 0.994526835 |
| g Klebsiella B  | g Verticillium                 | -0.097387214 | 0.207801408 | 0.874689648 |
| g Klebsiella B  | g unclassified Tremellomycetes | 0.127260875  | 0.099183729 | 0.8415005   |
| g Klebsiella B  | g Candida                      | 0.006869053  | 0.929371203 | 0.996251765 |
| g Klebsiella B  | g Cladosporium                 | -0.067235882 | 0.385086332 | 0.906174944 |
| g Klebsiella B  | g Debaromyces                  | -0.022467714 | 0.771855144 | 0.984485347 |
| g Klebsiella B  | g Aspergillus                  | 0.001017027  | 0.989529475 | 0.999049974 |
| g Klebsiella B  | g Kazachstania                 | 0.047322725  | 0.54121809  | 0.94160936  |
| g Klebsiella B  | g Malassezia                   | -0.095691396 | 0.215865265 | 0.874689648 |
| g Klebsiella B  | g unclassified Fungi           | -0.088606135 | 0.251966669 | 0.874689648 |
| g Klebsiella B  | g Fusarium                     | -0.105281295 | 0.17310698  | 0.868752404 |
| g Klebsiella B  | g Mycosphaerella               | -0.016113084 | 0.835284441 | 0.994526835 |
| g Klebsiella B  | g Simplicillium                | -0.00767796  | 0.921079399 | 0.996251765 |
| g Klebsiella B  | g unclassified Cordycipitaceae | -0.226439916 | 0.003072167 | 0.550026842 |
| g Klebsiella B  | g unidentified                 | 0.029354811  | 0.704790359 | 0.967508066 |
| g Citrobacter B | g Verticillium                 | -0.090525953 | 0.241796516 | 0.874689648 |
| g Citrobacter B | g unclassified Tremellomycetes | 0.170274637  | 0.026874861 | 0.765986149 |
| g Citrobacter B | g Candida                      | -0.026751978 | 0.729901603 | 0.973325332 |
| g Citrobacter B | g Cladosporium                 | -0.104456942 | 0.176515348 | 0.872198778 |
| g Citrobacter B | g Debaromyces                  | 0.107779144  | 0.163077226 | 0.859887758 |
| g Citrobacter B | g Aspergillus                  | -0.014914686 | 0.847379847 | 0.994526835 |
| g Citrobacter B | g Kazachstania                 | 0.155049768  | 0.044127576 | 0.817455693 |
| g Citrobacter B | g Malassezia                   | 0.013083679  | 0.865928232 | 0.994526835 |
| g Citrobacter B | g unclassified Fungi           | 0.009664211  | 0.900756926 | 0.995280411 |
| g Citrobacter B | g Fusarium                     | 0.004149487  | 0.95729911  | 0.997257748 |
| g Citrobacter B | g Mycosphaerella               | -0.132335238 | 0.086319262 | 0.8415005   |
| g Citrobacter B | g Simplicillium                | -0.022216138 | 0.774340721 | 0.984510076 |
| g Citrobacter B | g unclassified Cordycipitaceae | -0.158187337 | 0.03996362  | 0.808354944 |
| g Citrobacter B | g unidentified                 | -0.093138203 | 0.228423282 | 0.874689648 |
| g Yersinia      | g Verticillium                 | -0.038749984 | 0.616934946 | 0.952309753 |
| g Yersinia      | g unclassified Tremellomycetes | 0.079530329  | 0.304020354 | 0.897852684 |
| g Yersinia      | g Candida                      | -0.047832481 | 0.536864837 | 0.941323418 |
| g Yersinia      | g Cladosporium                 | -0.093116212 | 0.228533643 | 0.874689648 |
| g Yersinia      | g Debaromyces                  | 0.017302157  | 0.82332117  | 0.992484281 |
| g Yersinia      | g Aspergillus                  | 0.030600371  | 0.692883526 | 0.966086731 |
| g Yersinia      | g Kazachstania                 | 0.071475787  | 0.355761888 | 0.900151743 |
| g Yersinia      | g Malassezia                   | -0.02257493  | 0.770796547 | 0.984136305 |
| g Yersinia      | g unclassified Fungi           | 0.044295759  | 0.56742232  | 0.942564508 |
| g Yersinia      | g Fusarium                     | 0.041892213  | 0.588649312 | 0.947252808 |
| g Yersinia      | g Mycosphaerella               | -0.053169397 | 0.492361249 | 0.933370788 |
| g Yersinia      | g Simplicillium                | -0.031561554 | 0.683746119 | 0.963892039 |
| g Yersinia      | g unclassified Cordycipitaceae | -0.142114063 | 0.065308935 | 0.836350979 |
| g Yersinia      | g unidentified                 | 0.070979044  | 0.359123467 | 0.900151743 |
| g Cronobacter   | g Verticillium                 | -0.067037017 | 0.386496755 | 0.906174944 |
| g Cronobacter   | g unclassified Tremellomycetes | 0.174966246  | 0.022890336 | 0.764130246 |
| g Cronobacter   | g Candida                      | -0.01069468  | 0.890238101 | 0.994653074 |
| g Cronobacter   | g Cladosporium                 | -0.070190612 | 0.364499428 | 0.901117392 |
| g Cronobacter   | g Debaromyces                  | 0.024500301  | 0.751860173 | 0.980278684 |
| g Cronobacter   | g Aspergillus                  | 0.008113723  | 0.916616017 | 0.996251765 |
| g Cronobacter   | g Kazachstania                 | 0.089644681  | 0.246428905 | 0.874689648 |

|                    |                                |              |             |              |
|--------------------|--------------------------------|--------------|-------------|--------------|
| g Cronobacter      | g Malassezia                   | 0.015327465  | 0.843209501 | 0.994526835  |
| g Cronobacter      | g unclassified Fungi           | 0.041630999  | 0.590977948 | 0.947252808  |
| g Cronobacter      | g Fusarium                     | 0.051090734  | 0.509458444 | 0.937011504  |
| g Cronobacter      | g Mycosphaerella               | -0.121743131 | 0.11484489  | 0.843328451  |
| g Cronobacter      | g Simplicillium                | 0.023886758  | 0.757879026 | 0.981498019  |
| g Cronobacter      | g unclassified Cordycipitaceae | -0.159814118 | 0.037938047 | 0.808354944  |
| g Cronobacter      | g unidentified                 | 0.029176266  | 0.70650312  | 0.96831002   |
| g Pantoea          | g Verticillium                 | -0.061423585 | 0.42758573  | 0.918239588  |
| g Pantoea          | g unclassified Tremellomycetes | 0.160571621  | 0.03702479  | 0.808354944  |
| g Pantoea          | g Candida                      | -0.042085143 | 0.586932102 | 0.947150582  |
| g Pantoea          | g Cladosporium                 | -0.090653941 | 0.241128836 | 0.874689648  |
| g Pantoea          | g Debaromyces                  | 0.082199549  | 0.288025807 | 0.891214772  |
| g Pantoea          | g Aspergillus                  | -0.041077321 | 0.59592764  | 0.947600269  |
| g Pantoea          | g Kazachstania                 | 0.02648596   | 0.732484835 | 0.973693103  |
| g Pantoea          | g Malassezia                   | -0.019490162 | 0.801415556 | 0.988219716  |
| g Pantoea          | g unclassified Fungi           | 0.064138074  | 0.407409934 | 0.9131116876 |
| g Pantoea          | g Fusarium                     | 0.079599656  | 0.303597679 | 0.897548306  |
| g Pantoea          | g Mycosphaerella               | -0.089165768 | 0.248971985 | 0.874689648  |
| g Pantoea          | g Simplicillium                | 0.023945478  | 0.757302352 | 0.981293944  |
| g Pantoea          | g unclassified Cordycipitaceae | -0.168537648 | 0.02849366  | 0.77775889   |
| g Pantoea          | g unidentified                 | 0.016399624  | 0.832397989 | 0.994526835  |
| g Salmonella       | g Verticillium                 | -0.051908095 | 0.502699034 | 0.936281889  |
| g Salmonella       | g unclassified Tremellomycetes | 0.159609634  | 0.038187806 | 0.808354944  |
| g Salmonella       | g Candida                      | -0.011886658 | 0.87809458  | 0.994526835  |
| g Salmonella       | g Cladosporium                 | -0.062494921 | 0.419554887 | 0.916661525  |
| g Salmonella       | g Debaromyces                  | 0.048383629  | 0.532177819 | 0.940412658  |
| g Salmonella       | g Aspergillus                  | -0.013391042 | 0.8628092   | 0.994526835  |
| g Salmonella       | g Kazachstania                 | 0.077811214  | 0.314625421 | 0.989525398  |
| g Salmonella       | g Malassezia                   | 0.020330238  | 0.793044907 | 0.986710331  |
| g Salmonella       | g unclassified Fungi           | 0.047105122  | 0.543081698 | 0.942564508  |
| g Salmonella       | g Fusarium                     | 0.038331276  | 0.620748231 | 0.952309753  |
| g Salmonella       | g Mycosphaerella               | -0.085547131 | 0.268775208 | 0.880885289  |
| g Salmonella       | g Simplicillium                | 0.009703162  | 0.900358996 | 0.995280411  |
| g Salmonella       | g unclassified Cordycipitaceae | -0.143746864 | 0.062246548 | 0.832568254  |
| g Salmonella       | g unidentified                 | 0.011026389  | 0.886856059 | 0.994526835  |
| g Enterobacter D   | g Verticillium                 | -0.03287106  | 0.671371114 | 0.96129685   |
| g Enterobacter D   | g unclassified Tremellomycetes | 0.130876244  | 0.089873209 | 0.8415005    |
| g Enterobacter D   | g Candida                      | -0.057200298 | 0.460095181 | 0.92742804   |
| g Enterobacter D   | g Cladosporium                 | -0.089457081 | 0.247422926 | 0.874689648  |
| g Enterobacter D   | g Debaromyces                  | 0.049424895  | 0.523379186 | 0.939740222  |
| g Enterobacter D   | g Aspergillus                  | 0.019352117  | 0.802793242 | 0.988396129  |
| g Enterobacter D   | g Kazachstania                 | 0.113567978  | 0.141511067 | 0.849249996  |
| g Enterobacter D   | g Malassezia                   | -0.035330393 | 0.648369295 | 0.955501166  |
| g Enterobacter D   | g unclassified Fungi           | 0.047217108  | 0.542122228 | 0.941903852  |
| g Enterobacter D   | g Fusarium                     | 0.036863965  | 0.634190793 | 0.954116909  |
| g Enterobacter D   | g Mycosphaerella               | -0.054427064 | 0.482166684 | 0.932872225  |
| g Enterobacter D   | g Simplicillium                | 0.007858155  | 0.919233415 | 0.996251765  |
| g Enterobacter D   | g unclassified Cordycipitaceae | -0.140513966 | 0.068428351 | 0.836518447  |
| g Enterobacter D   | g unidentified                 | 0.046654     | 0.546955284 | 0.942564508  |
| g Providencia      | g Verticillium                 | -0.054204468 | 0.483962836 | 0.932872225  |
| g Providencia      | g unclassified Tremellomycetes | 0.111580828  | 0.148654808 | 0.849249996  |
| g Providencia      | g Candida                      | -0.055253823 | 0.475527759 | 0.93028395   |
| g Providencia      | g Cladosporium                 | -0.172216072 | 0.025159286 | 0.765986149  |
| g Providencia      | g Debaromyces                  | 0.051925621  | 0.502554619 | 0.936281889  |
| g Providencia      | g Aspergillus                  | 0.010850269  | 0.888651495 | 0.994639994  |
| g Providencia      | g Kazachstania                 | 0.051551938  | 0.505638598 | 0.936546622  |
| g Providencia      | g Malassezia                   | -0.034661749 | 0.65459136  | 0.956614192  |
| g Providencia      | g unclassified Fungi           | -0.02599839  | 0.737227272 | 0.976057954  |
| g Providencia      | g Fusarium                     | -0.002534301 | 0.973912669 | 0.998625698  |
| g Providencia      | g Mycosphaerella               | -0.129890336 | 0.09234017  | 0.8415005    |
| g Providencia      | g Simplicillium                | -0.054089017 | 0.484895758 | 0.932872225  |
| g Providencia      | g unclassified Cordycipitaceae | -0.121031764 | 0.116997049 | 0.847264344  |
| g Providencia      | g unidentified                 | 0.01742883   | 0.822049058 | 0.992484281  |
| g Kosakonia        | g Verticillium                 | -0.031060933 | 0.688499606 | 0.96434561   |
| g Kosakonia        | g unclassified Tremellomycetes | 0.136959687  | 0.075792488 | 0.8415005    |
| g Kosakonia        | g Candida                      | -0.012723274 | 0.869588158 | 0.994526835  |
| g Kosakonia        | g Cladosporium                 | 0.010925992  | 0.887879473 | 0.994526835  |
| g Kosakonia        | g Debaromyces                  | -0.015451458 | 0.841957632 | 0.994526835  |
| g Kosakonia        | g Aspergillus                  | -0.0351559   | 0.649990718 | 0.955597379  |
| g Kosakonia        | g Kazachstania                 | -0.045195964 | 0.559566727 | 0.942564508  |
| g Kosakonia        | g Malassezia                   | -0.063861602 | 0.409438746 | 0.9131116876 |
| g Kosakonia        | g unclassified Fungi           | -0.146176633 | 0.057908232 | 0.832568254  |
| g Kosakonia        | g Fusarium                     | -0.103308939 | 0.181344103 | 0.872371283  |
| g Kosakonia        | g Mycosphaerella               | -0.008514663 | 0.912511606 | 0.996251765  |
| g Kosakonia        | g Simplicillium                | -0.047320781 | 0.541234724 | 0.94160936   |
| g Kosakonia        | g unclassified Cordycipitaceae | -0.017375859 | 0.822580967 | 0.992484281  |
| g Kosakonia        | g unidentified                 | -0.103962472 | 0.178583425 | 0.872371283  |
| g Pseudoscherichia | g Verticillium                 | -0.072822877 | 0.346745213 | 0.900151743  |

|                    |                                |              |             |             |
|--------------------|--------------------------------|--------------|-------------|-------------|
| g Pseudoscherichia | g unclassified Tremellomycetes | 0.1492982    | 0.052703289 | 0.832568254 |
| g Pseudoscherichia | g Candida                      | 0.037485409  | 0.62848257  | 0.953367345 |
| g Pseudoscherichia | g Cladosporium                 | -0.002210275 | 0.977247134 | 0.998625698 |
| g Pseudoscherichia | g Debaryomyces                 | 0.073826565  | 0.340121677 | 0.900151743 |
| g Pseudoscherichia | g Aspergillus                  | -0.002099578 | 0.978386379 | 0.998625698 |
| g Pseudoscherichia | g Kazachstania                 | 0.028606584  | 0.71197781  | 0.968978798 |
| g Pseudoscherichia | g Malassezia                   | -0.00938439  | 0.903616337 | 0.995280411 |
| g Pseudoscherichia | g unclassified Fungi           | -0.030047241 | 0.698162065 | 0.967320417 |
| g Pseudoscherichia | g Fusarium                     | -0.003038328 | 0.968726784 | 0.998625698 |
| g Pseudoscherichia | g Mycosphaerella               | -0.078870204 | 0.308064443 | 0.897967316 |
| g Pseudoscherichia | g Simplicillium                | -0.013503647 | 0.861667034 | 0.994526835 |
| g Pseudoscherichia | g unclassified Cordycipitaceae | -0.159110596 | 0.038803156 | 0.808354944 |
| g Pseudoscherichia | g unidentified                 | 0.008734855  | 0.910258488 | 0.996251765 |
| g Serratia         | g Verticillium                 | -0.067940614 | 0.380113288 | 0.90490297  |
| g Serratia         | g unclassified Tremellomycetes | 0.078641871  | 0.309471442 | 0.897967316 |
| g Serratia         | g Candida                      | 0.006044354  | 0.937832713 | 0.996251765 |
| g Serratia         | g Cladosporium                 | -0.101076098 | 0.191012906 | 0.874689648 |
| g Serratia         | g Debaryomyces                 | 0.006228632  | 0.935941365 | 0.996251765 |
| g Serratia         | g Aspergillus                  | 0.075198084  | 0.331201615 | 0.900151743 |
| g Serratia         | g Kazachstania                 | 0.035829019  | 0.643745093 | 0.955501166 |
| g Serratia         | g Malassezia                   | -0.091157395 | 0.238514926 | 0.874689648 |
| g Serratia         | g unclassified Fungi           | 0.023460326  | 0.762070939 | 0.982076388 |
| g Serratia         | g Fusarium                     | 0.022921966  | 0.767373006 | 0.982757267 |
| g Serratia         | g Mycosphaerella               | -0.062574127 | 0.41896466  | 0.916661525 |
| g Serratia         | g Simplicillium                | 0.005336954  | 0.945096308 | 0.996925697 |
| g Serratia         | g unclassified Cordycipitaceae | -0.159801658 | 0.037953225 | 0.808354944 |
| g Serratia         | g unidentified                 | 0.015654217  | 0.839911381 | 0.994526835 |
| g Proteus          | g Verticillium                 | -0.100229302 | 0.194776408 | 0.874689648 |
| g Proteus          | g unclassified Tremellomycetes | 0.111195633  | 0.15007061  | 0.849249996 |
| g Proteus          | g Candida                      | -0.02980185  | 0.700508491 | 0.967505184 |
| g Proteus          | g Cladosporium                 | -0.061110173 | 0.429951759 | 0.918239588 |
| g Proteus          | g Debaryomyces                 | 0.083903698  | 0.278113708 | 0.889320764 |
| g Proteus          | g Aspergillus                  | -0.011970125 | 0.877245272 | 0.994526835 |
| g Proteus          | g Kazachstania                 | -0.039073979 | 0.61399124  | 0.951172976 |
| g Proteus          | g Malassezia                   | -0.092932285 | 0.229458115 | 0.874689648 |
| g Proteus          | g unclassified Fungi           | 0.011244579  | 0.884632547 | 0.994526835 |
| g Proteus          | g Fusarium                     | -0.041458697 | 0.592516259 | 0.947273049 |
| g Proteus          | g Mycosphaerella               | -0.1153213   | 0.135427707 | 0.849249996 |
| g Proteus          | g Simplicillium                | -0.053597485 | 0.488878446 | 0.932872225 |
| g Proteus          | g unclassified Cordycipitaceae | -0.118742285 | 0.124137066 | 0.849176369 |
| g Proteus          | g unidentified                 | 0.035313991  | 0.648521635 | 0.955501166 |
| g Atlantibacter    | g Verticillium                 | -0.048199005 | 0.53374559  | 0.940891392 |
| g Atlantibacter    | g unclassified Tremellomycetes | 0.182632305  | 0.017471927 | 0.702895198 |
| g Atlantibacter    | g Candida                      | -0.011538571 | 0.881637983 | 0.994526835 |
| g Atlantibacter    | g Cladosporium                 | -0.084405262 | 0.275240751 | 0.887581673 |
| g Atlantibacter    | g Debaryomyces                 | 0.072479311  | 0.349031045 | 0.900151743 |
| g Atlantibacter    | g Aspergillus                  | -0.007625227 | 0.921619699 | 0.996251765 |
| g Atlantibacter    | g Kazachstania                 | 0.113292343  | 0.142486053 | 0.849249996 |
| g Atlantibacter    | g Malassezia                   | -0.012945969 | 0.867326358 | 0.994526835 |
| g Atlantibacter    | g unclassified Fungi           | 0.006172352  | 0.936518957 | 0.996251765 |
| g Atlantibacter    | g Fusarium                     | 0.010796141  | 0.889203411 | 0.994639994 |
| g Atlantibacter    | g Mycosphaerella               | -0.072753634 | 0.34720514  | 0.900151743 |
| g Atlantibacter    | g Simplicillium                | 0.027611079  | 0.721579974 | 0.971835476 |
| g Atlantibacter    | g unclassified Cordycipitaceae | -0.129078536 | 0.094411674 | 0.8415005   |
| g Atlantibacter    | g unidentified                 | -0.050356207 | 0.515572815 | 0.938796978 |
| g RIT-PI-d         | g Verticillium                 | -0.05808984  | 0.453136033 | 0.923868417 |
| g RIT-PI-d         | g unclassified Tremellomycetes | 0.135607872  | 0.078756311 | 0.8415005   |
| g RIT-PI-d         | g Candida                      | -0.093149366 | 0.22836728  | 0.874689648 |
| g RIT-PI-d         | g Cladosporium                 | -0.07517838  | 0.331328689 | 0.900151743 |
| g RIT-PI-d         | g Debaryomyces                 | 0.094066272  | 0.223800196 | 0.874689648 |
| g RIT-PI-d         | g Aspergillus                  | 0.005250598  | 0.945983338 | 0.996925697 |
| g RIT-PI-d         | g Kazachstania                 | 0.098459084  | 0.202817503 | 0.874689648 |
| g RIT-PI-d         | g Malassezia                   | -0.018106403 | 0.81525248  | 0.991446871 |
| g RIT-PI-d         | g unclassified Fungi           | -0.046295524 | 0.550042997 | 0.942564508 |
| g RIT-PI-d         | g Fusarium                     | -0.00533498  | 0.945116584 | 0.996925697 |
| g RIT-PI-d         | g Mycosphaerella               | -0.083691538 | 0.279335032 | 0.889320764 |
| g RIT-PI-d         | g Simplicillium                | -0.017644541 | 0.81988385  | 0.992423039 |
| g RIT-PI-d         | g unclassified Cordycipitaceae | -0.182095043 | 0.017811565 | 0.702895198 |
| g RIT-PI-d         | g unidentified                 | 0.005604371  | 0.942349907 | 0.996925697 |
| g Pluralibacter    | g Verticillium                 | -0.02428464  | 0.753974119 | 0.980575998 |
| g Pluralibacter    | g unclassified Tremellomycetes | 0.13133768   | 0.088736798 | 0.8415005   |
| g Pluralibacter    | g Candida                      | 0.014883172  | 0.847698419 | 0.994526835 |
| g Pluralibacter    | g Cladosporium                 | -0.10533965  | 0.172867568 | 0.868752404 |
| g Pluralibacter    | g Debaryomyces                 | 0.053144778  | 0.492561946 | 0.933370788 |
| g Pluralibacter    | g Aspergillus                  | -0.019954266 | 0.796788296 | 0.987463135 |
| g Pluralibacter    | g Kazachstania                 | 0.03140919   | 0.685191537 | 0.963892039 |
| g Pluralibacter    | g Malassezia                   | 0.043206452  | 0.576997509 | 0.943618965 |
| g Pluralibacter    | g unclassified Fungi           | 0.013124144  | 0.865517484 | 0.994526835 |



|                   |                                |              |             |             |
|-------------------|--------------------------------|--------------|-------------|-------------|
| g Pluralibacter   | g Fusarium                     | 0.050717979  | 0.512556637 | 0.938277062 |
| g Pluralibacter   | g Mycosphaerella               | -0.098737674 | 0.201536386 | 0.874689648 |
| g Pluralibacter   | g Simplicillium                | 0.010639669  | 0.890799177 | 0.994653074 |
| g Pluralibacter   | g unclassified Cordycipitaceae | -0.175666309 | 0.022341717 | 0.755138537 |
| g Pluralibacter   | g unidentified                 | 0.011398592  | 0.883063583 | 0.994526835 |
| g Succinivibrio   | g Verticillium                 | -0.052368239 | 0.498914512 | 0.936237403 |
| g Succinivibrio   | g unclassified Tremellomycetes | 0.037114241  | 0.631889284 | 0.954051837 |
| g Succinivibrio   | g Candida                      | 0.019038657  | 0.805923829 | 0.989083527 |
| g Succinivibrio   | g Cladosporium                 | -0.106797053 | 0.166967577 | 0.864987015 |
| g Succinivibrio   | g Debaromyces                  | -0.059923116 | 0.438981199 | 0.919791111 |
| g Succinivibrio   | g Aspergillus                  | -0.075615802 | 0.328514928 | 0.899370541 |
| g Succinivibrio   | g Kazachstania                 | -0.127415388 | 0.098770796 | 0.8415005   |
| g Succinivibrio   | g Malassezia                   | -0.069982957 | 0.365923585 | 0.901117392 |
| g Succinivibrio   | g unclassified Fungi           | -0.160047855 | 0.037654246 | 0.808354944 |
| g Succinivibrio   | g Fusarium                     | -0.008995666 | 0.907590657 | 0.996251765 |
| g Succinivibrio   | g Mycosphaerella               | -0.050674705 | 0.512916938 | 0.938277062 |
| g Succinivibrio   | g Simplicillium                | 0.065435894  | 0.397965926 | 0.909588897 |
| g Succinivibrio   | g unclassified Cordycipitaceae | -0.111463175 | 0.149086171 | 0.849249996 |
| g Succinivibrio   | g unidentified                 | 0.006687046  | 0.931237976 | 0.996251765 |
| g Haemophilus D   | g Verticillium                 | -0.096121219 | 0.213800577 | 0.874689648 |
| g Haemophilus D   | g unclassified Tremellomycetes | -0.011529181 | 0.881733598 | 0.994526835 |
| g Haemophilus D   | g Candida                      | 0.035540474  | 0.646419383 | 0.955501166 |
| g Haemophilus D   | g Cladosporium                 | -0.012047167 | 0.876461471 | 0.994526835 |
| g Haemophilus D   | g Debaromyces                  | -0.054704853 | 0.479930571 | 0.932202453 |
| g Haemophilus D   | g Aspergillus                  | 0.071359363  | 0.356547991 | 0.900151743 |
| g Haemophilus D   | g Kazachstania                 | 0.044294947  | 0.567429427 | 0.942564508 |
| g Haemophilus D   | g Malassezia                   | -0.127692653 | 0.098033223 | 0.8415005   |
| g Haemophilus D   | g unclassified Fungi           | 0.231419702  | 0.002467221 | 0.550026842 |
| g Haemophilus D   | g Fusarium                     | -0.057714532 | 0.456064974 | 0.924332119 |
| g Haemophilus D   | g Mycosphaerella               | -0.08526532  | 0.270361202 | 0.881811135 |
| g Haemophilus D   | g Simplicillium                | -0.054257968 | 0.483530849 | 0.932872225 |
| g Haemophilus D   | g unclassified Cordycipitaceae | -0.134845037 | 0.080469624 | 0.8415005   |
| g Haemophilus D   | g unidentified                 | 0.07492712   | 0.33295191  | 0.900151743 |
| g Haemophilus A   | g Verticillium                 | -0.066095597 | 0.393215924 | 0.907694413 |
| g Haemophilus A   | g unclassified Tremellomycetes | -0.000492816 | 0.994926239 | 0.999049974 |
| g Haemophilus A   | g Candida                      | 0.051658302  | 0.504759775 | 0.936546622 |
| g Haemophilus A   | g Cladosporium                 | 0.034932881  | 0.652065443 | 0.955672086 |
| g Haemophilus A   | g Debaromyces                  | -0.068529534 | 0.375987634 | 0.903077197 |
| g Haemophilus A   | g Aspergillus                  | 0.077750588  | 0.315003764 | 0.898525398 |
| g Haemophilus A   | g Kazachstania                 | 0.096824753  | 0.210451632 | 0.874689648 |
| g Haemophilus A   | g Malassezia                   | -0.126382192 | 0.10155801  | 0.8415005   |
| g Haemophilus A   | g unclassified Fungi           | 0.166935757  | 0.030059612 | 0.785763434 |
| g Haemophilus A   | g Fusarium                     | -0.092571145 | 0.231280983 | 0.874689648 |
| g Haemophilus A   | g Mycosphaerella               | -0.078672291 | 0.309283751 | 0.897967316 |
| g Haemophilus A   | g Simplicillium                | 0.005210529  | 0.946394935 | 0.996925697 |
| g Haemophilus A   | g unclassified Cordycipitaceae | -0.099574388 | 0.197723859 | 0.874689648 |
| g Haemophilus A   | g unidentified                 | 0.064613591  | 0.403934414 | 0.912338681 |
| g Aggregatibacter | g Verticillium                 | -0.040120247 | 0.604527419 | 0.950399198 |
| g Aggregatibacter | g unclassified Tremellomycetes | -0.018324824 | 0.81306446  | 0.991049439 |
| g Aggregatibacter | g Candida                      | -0.036891467 | 0.633937709 | 0.954116909 |
| g Aggregatibacter | g Cladosporium                 | 0.001666756  | 0.982841191 | 0.998625698 |
| g Aggregatibacter | g Debaromyces                  | -0.095255058 | 0.217975767 | 0.874689648 |
| g Aggregatibacter | g Aspergillus                  | 0.011018456  | 0.886936917 | 0.994526835 |
| g Aggregatibacter | g Kazachstania                 | 0.076684133  | 0.32170752  | 0.898854824 |
| g Aggregatibacter | g Malassezia                   | -0.091176049 | 0.238418458 | 0.874689648 |
| g Aggregatibacter | g unclassified Fungi           | 0.236808945  | 0.001935974 | 0.550026842 |
| g Aggregatibacter | g Fusarium                     | -0.095113811 | 0.218662096 | 0.874689648 |
| g Aggregatibacter | g Mycosphaerella               | 0.0109939    | 0.887187221 | 0.994526835 |
| g Aggregatibacter | g Simplicillium                | 0.038073798  | 0.623098183 | 0.952309753 |
| g Aggregatibacter | g unclassified Cordycipitaceae | -0.12436136  | 0.107188646 | 0.843328451 |
| g Aggregatibacter | g unidentified                 | 0.13462223   | 0.080975666 | 0.8415005   |
| g Aeromonas       | g Verticillium                 | 0.039161221  | 0.613199643 | 0.951172976 |
| g Aeromonas       | g unclassified Tremellomycetes | 0.121937775  | 0.114261429 | 0.843328451 |
| g Aeromonas       | g Candida                      | 0.023460029  | 0.762073861 | 0.982076388 |
| g Aeromonas       | g Cladosporium                 | -0.049883505 | 0.519527563 | 0.939250598 |
| g Aeromonas       | g Debaromyces                  | -0.093267451 | 0.22777544  | 0.874689648 |
| g Aeromonas       | g Aspergillus                  | -0.051637826 | 0.504928897 | 0.936546622 |
| g Aeromonas       | g Kazachstania                 | 0.002676854  | 0.972445836 | 0.998625698 |
| g Aeromonas       | g Malassezia                   | 0.039697056  | 0.608347501 | 0.951102497 |
| g Aeromonas       | g unclassified Fungi           | -0.007725053 | 0.920596919 | 0.996251765 |
| g Aeromonas       | g Fusarium                     | -0.025888549 | 0.738297038 | 0.976420387 |
| g Aeromonas       | g Mycosphaerella               | -0.025458742 | 0.742487843 | 0.977770666 |
| g Aeromonas       | g Simplicillium                | -0.034118019 | 0.65966864  | 0.957536638 |
| g Aeromonas       | g unclassified Cordycipitaceae | 0.034199693  | 0.658904981 | 0.956966684 |
| g Aeromonas       | g unidentified                 | -0.050210211 | 0.516792601 | 0.938796978 |
| g Sutterella      | g Verticillium                 | -0.064817393 | 0.40245024  | 0.911928055 |
| g Sutterella      | g unclassified Tremellomycetes | -0.110711387 | 0.151864906 | 0.84984956  |
| g Sutterella      | g Candida                      | -0.00456325  | 0.953045869 | 0.99717368  |

|                   |                                |              |             |             |
|-------------------|--------------------------------|--------------|-------------|-------------|
| g Sutterella      | g Cladosporium                 | -0.081123292 | 0.294405995 | 0.892181547 |
| g Sutterella      | g Debaryomyces                 | -0.076896731 | 0.320363812 | 0.898741278 |
| g Sutterella      | g Aspergillus                  | 0.065609878  | 0.396709891 | 0.909588897 |
| g Sutterella      | g Kazachstania                 | -0.061153565 | 0.429623735 | 0.918239588 |
| g Sutterella      | g Malassezia                   | -0.09211515  | 0.233597167 | 0.874689648 |
| g Sutterella      | g unclassified Fungi           | 0.077270546  | 0.318009978 | 0.898525398 |
| g Sutterella      | g Fusarium                     | -0.005970696 | 0.938588808 | 0.996251765 |
| g Sutterella      | g Mycosphaerella               | 0.006305313  | 0.935154445 | 0.996251765 |
| g Sutterella      | g Simplicillium                | 0.000170148  | 0.998248244 | 0.999334917 |
| g Sutterella      | g unclassified Cordycipitaceae | -0.222877209 | 0.003584021 | 0.580842757 |
| g Sutterella      | g unidentified                 | 0.148337288  | 0.054262551 | 0.832568254 |
| g Oxalobacter     | g Verticillium                 | -0.027147258 | 0.726068769 | 0.972631421 |
| g Oxalobacter     | g unclassified Tremellomycetes | -0.196445681 | 0.010472244 | 0.613926619 |
| g Oxalobacter     | g Candida                      | -0.008494615 | 0.912716782 | 0.996251765 |
| g Oxalobacter     | g Cladosporium                 | -0.12947832  | 0.093386962 | 0.8415005   |
| g Oxalobacter     | g Debaryomyces                 | -0.04099188  | 0.596693117 | 0.947940605 |
| g Oxalobacter     | g Aspergillus                  | 0.007745751  | 0.920384868 | 0.996251765 |
| g Oxalobacter     | g Kazachstania                 | -0.078152019 | 0.312504102 | 0.898139407 |
| g Oxalobacter     | g Malassezia                   | -0.083256927 | 0.281848182 | 0.8902203   |
| g Oxalobacter     | g unclassified Fungi           | 0.023635485  | 0.760348247 | 0.982076388 |
| g Oxalobacter     | g Fusarium                     | -0.084849539 | 0.272712751 | 0.88516315  |
| g Oxalobacter     | g Mycosphaerella               | -0.129814229 | 0.092532824 | 0.8415005   |
| g Oxalobacter     | g Simplicillium                | 0.00187009   | 0.980748311 | 0.998625698 |
| g Oxalobacter     | g unclassified Cordycipitaceae | -0.179561318 | 0.019491678 | 0.702895198 |
| g Oxalobacter     | g unidentified                 | 0.092204771  | 0.233140662 | 0.874689648 |
| g Parasutterella  | g Verticillium                 | 0.002689088  | 0.972319949 | 0.998625698 |
| g Parasutterella  | g unclassified Tremellomycetes | 0.075143632  | 0.331552875 | 0.900151743 |
| g Parasutterella  | g Candida                      | -0.059440739 | 0.44268106  | 0.92043404  |
| g Parasutterella  | g Cladosporium                 | 0.013734227  | 0.859329146 | 0.994526835 |
| g Parasutterella  | g Debaryomyces                 | 0.007911915  | 0.918682754 | 0.996251765 |
| g Parasutterella  | g Aspergillus                  | 0.099400075  | 0.198513781 | 0.874689648 |
| g Parasutterella  | g Kazachstania                 | -0.05702194  | 0.46149763  | 0.927602832 |
| g Parasutterella  | g Malassezia                   | -0.027223237 | 0.725332812 | 0.972631421 |
| g Parasutterella  | g unclassified Fungi           | -0.010883451 | 0.888313182 | 0.994639994 |
| g Parasutterella  | g Fusarium                     | -0.115197413 | 0.135850865 | 0.849249996 |
| g Parasutterella  | g Mycosphaerella               | 0.019080309  | 0.80550766  | 0.988960513 |
| g Parasutterella  | g Simplicillium                | 0.042984878  | 0.578954374 | 0.944349272 |
| g Parasutterella  | g unclassified Cordycipitaceae | 0.102530296  | 0.1846741   | 0.873641816 |
| g Parasutterella  | g unidentified                 | -0.030522011 | 0.693630427 | 0.966086731 |
| g Duodenibacillus | g Verticillium                 | -0.013811664 | 0.858544279 | 0.994526835 |
| g Duodenibacillus | g unclassified Tremellomycetes | -0.127234759 | 0.099253659 | 0.8415005   |
| g Duodenibacillus | g Candida                      | -0.060820532 | 0.432145019 | 0.918239588 |
| g Duodenibacillus | g Cladosporium                 | 0.057387276  | 0.458627497 | 0.925683065 |
| g Duodenibacillus | g Debaryomyces                 | -0.052234881 | 0.500009791 | 0.936281889 |
| g Duodenibacillus | g Aspergillus                  | 0.005099502  | 0.947535515 | 0.996925697 |
| g Duodenibacillus | g Kazachstania                 | -0.05389517  | 0.486464339 | 0.932872225 |
| g Duodenibacillus | g Malassezia                   | -0.02383504  | 0.758387057 | 0.981742527 |
| g Duodenibacillus | g unclassified Fungi           | 0.042015693  | 0.587549991 | 0.947150582 |
| g Duodenibacillus | g Fusarium                     | -0.009426703 | 0.90318387  | 0.995280411 |
| g Duodenibacillus | g Mycosphaerella               | -0.039622099 | 0.609025238 | 0.951102497 |
| g Duodenibacillus | g Simplicillium                | 0.091742534  | 0.235501896 | 0.874689648 |
| g Duodenibacillus | g unclassified Cordycipitaceae | -0.166704133 | 0.030291995 | 0.785763434 |
| g Duodenibacillus | g unidentified                 | 0.054741583  | 0.479635303 | 0.932191974 |
| g Dakarella       | g Verticillium                 | 0.060642479  | 0.433496481 | 0.918239588 |
| g Dakarella       | g unclassified Tremellomycetes | -0.058894236 | 0.446894034 | 0.921010267 |
| g Dakarella       | g Candida                      | 0.04557757   | 0.556252517 | 0.942564508 |
| g Dakarella       | g Cladosporium                 | -0.020333784 | 0.793009632 | 0.986710331 |
| g Dakarella       | g Debaryomyces                 | 0.023943181  | 0.757324908 | 0.981293944 |
| g Dakarella       | g Aspergillus                  | -0.010689877 | 0.890287087 | 0.994653074 |
| g Dakarella       | g Kazachstania                 | -0.103711252 | 0.179640947 | 0.872371283 |
| g Dakarella       | g Malassezia                   | -0.053072578 | 0.493150766 | 0.933370788 |
| g Dakarella       | g unclassified Fungi           | -0.063429699 | 0.412620035 | 0.914444497 |
| g Dakarella       | g Fusarium                     | -0.028704787 | 0.711033012 | 0.968802592 |
| g Dakarella       | g Mycosphaerella               | -0.07154363  | 0.355304315 | 0.900151743 |
| g Dakarella       | g Simplicillium                | 0.055600748  | 0.47275674  | 0.928769554 |
| g Dakarella       | g unclassified Cordycipitaceae | 0.080851206  | 0.296033708 | 0.892181547 |
| g Dakarella       | g unidentified                 | -0.161960134 | 0.03539892  | 0.808354944 |
| g CAG-521         | g Verticillium                 | 0.04230741   | 0.584956626 | 0.945928844 |
| g CAG-521         | g unclassified Tremellomycetes | -0.044631942 | 0.564482524 | 0.942564508 |
| g CAG-521         | g Candida                      | 0.126848924  | 0.100291333 | 0.8415005   |
| g CAG-521         | g Cladosporium                 | -0.000444403 | 0.99542467  | 0.999049974 |
| g CAG-521         | g Debaryomyces                 | -0.055956207 | 0.469926716 | 0.928769554 |
| g CAG-521         | g Aspergillus                  | 0.161593929  | 0.035821751 | 0.808354944 |
| g CAG-521         | g Kazachstania                 | -0.141643121 | 0.066214735 | 0.836350979 |
| g CAG-521         | g Malassezia                   | -0.046098684 | 0.55174208  | 0.942564508 |
| g CAG-521         | g unclassified Fungi           | 0.01691395   | 0.827222597 | 0.993650851 |
| g CAG-521         | g Fusarium                     | -0.101084962 | 0.190973796 | 0.874689648 |
| g CAG-521         | g Mycosphaerella               | -0.114477572 | 0.138329653 | 0.849249996 |

|                                  |                                       |              |             |              |
|----------------------------------|---------------------------------------|--------------|-------------|--------------|
| g CAG-521                        | g <i>Simplicillium</i>                | 0.068370714  | 0.377097536 | 0.904275409  |
| g CAG-521                        | g unclassified <i>Cordycipitaceae</i> | -0.056271599 | 0.467423473 | 0.928418018  |
| g CAG-521                        | g unidentified                        | 0.113616554  | 0.14133977  | 0.849249996  |
| g <i>Dechloromonas</i>           | g <i>Verticillium</i>                 | -0.021940662 | 0.777065074 | 0.984510076  |
| g <i>Dechloromonas</i>           | g unclassified <i>Tremellomycetes</i> | -0.017509789 | 0.821236276 | 0.992484281  |
| g <i>Dechloromonas</i>           | g <i>Candida</i>                      | -0.061617159 | 0.426128144 | 0.918239588  |
| g <i>Dechloromonas</i>           | g <i>Cladosporium</i>                 | -0.038811075 | 0.616379427 | 0.952163468  |
| g <i>Dechloromonas</i>           | g <i>Debaryomyces</i>                 | 0.016136181  | 0.835051689 | 0.994526835  |
| g <i>Dechloromonas</i>           | g <i>Aspergillus</i>                  | -0.061829231 | 0.424534578 | 0.918239588  |
| g <i>Dechloromonas</i>           | g <i>Kazachstania</i>                 | 0.031387004  | 0.685402103 | 0.963892039  |
| g <i>Dechloromonas</i>           | g <i>Malassezia</i>                   | -0.06414271  | 0.407375965 | 0.9131116876 |
| g <i>Dechloromonas</i>           | g unclassified <i>Fungi</i>           | -0.233045832 | 0.002294453 | 0.550026842  |
| g <i>Dechloromonas</i>           | g <i>Fusarium</i>                     | -0.021254549 | 0.783862201 | 0.986469481  |
| g <i>Dechloromonas</i>           | g <i>Mycosphaerella</i>               | -0.187753478 | 0.014506937 | 0.702895198  |
| g <i>Dechloromonas</i>           | g <i>Simplicillium</i>                | 0.062884507  | 0.41665644  | 0.916564692  |
| g <i>Dechloromonas</i>           | g unclassified <i>Cordycipitaceae</i> | -0.057730304 | 0.455941677 | 0.924332119  |
| g <i>Dechloromonas</i>           | g unidentified                        | -0.065806386 | 0.395294099 | 0.909025558  |
| g <i>Neisseria</i>               | g <i>Verticillium</i>                 | -0.115588121 | 0.134519763 | 0.849249996  |
| g <i>Neisseria</i>               | g unclassified <i>Tremellomycetes</i> | -0.066179718 | 0.392612695 | 0.907694413  |
| g <i>Neisseria</i>               | g <i>Candida</i>                      | 0.016777556  | 0.82859434  | 0.993650851  |
| g <i>Neisseria</i>               | g <i>Cladosporium</i>                 | 0.012595094  | 0.870890508 | 0.994526835  |
| g <i>Neisseria</i>               | g <i>Debaryomyces</i>                 | 0.016559644  | 0.830787015 | 0.994526835  |
| g <i>Neisseria</i>               | g <i>Aspergillus</i>                  | 0.076638906  | 0.321993843 | 0.898854824  |
| g <i>Neisseria</i>               | g <i>Kazachstania</i>                 | 0.063869738  | 0.409378955 | 0.9131116876 |
| g <i>Neisseria</i>               | g <i>Malassezia</i>                   | -0.066956912 | 0.387065765 | 0.906305988  |
| g <i>Neisseria</i>               | g unclassified <i>Fungi</i>           | 0.145890225  | 0.058406293 | 0.832568254  |
| g <i>Neisseria</i>               | g <i>Fusarium</i>                     | -0.068563027 | 0.375753832 | 0.903077197  |
| g <i>Neisseria</i>               | g <i>Mycosphaerella</i>               | -0.006478824 | 0.933374074 | 0.996251765  |
| g <i>Neisseria</i>               | g <i>Simplicillium</i>                | 0.003875067  | 0.960120649 | 0.997919102  |
| g <i>Neisseria</i>               | g unclassified <i>Cordycipitaceae</i> | -0.201014652 | 0.008777496 | 0.613926619  |
| g <i>Neisseria</i>               | g unidentified                        | 0.084264267  | 0.276046336 | 0.888419029  |
| g <i>Acinetobacter</i>           | g <i>Verticillium</i>                 | -0.020167266 | 0.794666979 | 0.987047876  |
| g <i>Acinetobacter</i>           | g unclassified <i>Tremellomycetes</i> | 0.126569118  | 0.101049199 | 0.8415005    |
| g <i>Acinetobacter</i>           | g <i>Candida</i>                      | 0.059925489  | 0.43896304  | 0.91979111   |
| g <i>Acinetobacter</i>           | g <i>Cladosporium</i>                 | -0.006829177 | 0.929780162 | 0.996251765  |
| g <i>Acinetobacter</i>           | g <i>Debaryomyces</i>                 | -0.013007639 | 0.866700185 | 0.994526835  |
| g <i>Acinetobacter</i>           | g <i>Aspergillus</i>                  | 0.150022223  | 0.051553096 | 0.832568254  |
| g <i>Acinetobacter</i>           | g <i>Kazachstania</i>                 | -0.103891603 | 0.178881288 | 0.872371283  |
| g <i>Acinetobacter</i>           | g <i>Malassezia</i>                   | -0.078630271 | 0.309543033 | 0.897967316  |
| g <i>Acinetobacter</i>           | g unclassified <i>Fungi</i>           | 0.07291843   | 0.346111159 | 0.900151743  |
| g <i>Acinetobacter</i>           | g <i>Fusarium</i>                     | -0.000454995 | 0.995315617 | 0.999049974  |
| g <i>Acinetobacter</i>           | g <i>Mycosphaerella</i>               | -0.037207078 | 0.631036463 | 0.954051837  |
| g <i>Acinetobacter</i>           | g <i>Simplicillium</i>                | 0.028001876  | 0.717805253 | 0.97067915   |
| g <i>Acinetobacter</i>           | g unclassified <i>Cordycipitaceae</i> | -0.117433777 | 0.128366511 | 0.849249996  |
| g <i>Acinetobacter</i>           | g unidentified                        | -0.025139183 | 0.745608594 | 0.979082173  |
| g CAG-495                        | g <i>Verticillium</i>                 | 0.07065954   | 0.361296042 | 0.900157702  |
| g CAG-495                        | g unclassified <i>Tremellomycetes</i> | -0.09536725  | 0.21743171  | 0.874689648  |
| g CAG-495                        | g <i>Candida</i>                      | -0.038535805 | 0.618884261 | 0.952309753  |
| g CAG-495                        | g <i>Cladosporium</i>                 | 0.01145292   | 0.882510237 | 0.994526835  |
| g CAG-495                        | g <i>Debaryomyces</i>                 | 0.060906184  | 0.431495766 | 0.918239588  |
| g CAG-495                        | g <i>Aspergillus</i>                  | -0.03143815  | 0.684916712 | 0.963892039  |
| g CAG-495                        | g <i>Kazachstania</i>                 | 0.015067185  | 0.845838636 | 0.994526835  |
| g CAG-495                        | g <i>Malassezia</i>                   | -0.086433254 | 0.263829537 | 0.878368327  |
| g CAG-495                        | g unclassified <i>Fungi</i>           | -0.062401218 | 0.420253768 | 0.916661525  |
| g CAG-495                        | g <i>Fusarium</i>                     | -0.074326786 | 0.336850822 | 0.900151743  |
| g CAG-495                        | g <i>Mycosphaerella</i>               | -0.093570756 | 0.226260241 | 0.874689648  |
| g CAG-495                        | g <i>Simplicillium</i>                | -0.03455328  | 0.655602978 | 0.956614192  |
| g CAG-495                        | g unclassified <i>Cordycipitaceae</i> | 0.053349404  | 0.490895161 | 0.932872225  |
| g CAG-495                        | g unidentified                        | 0.054511222  | 0.481488758 | 0.932872225  |
| g <i>Phascolarctobacterium</i> A | g <i>Verticillium</i>                 | -0.046894145 | 0.544891584 | 0.942564508  |
| g <i>Phascolarctobacterium</i> A | g unclassified <i>Tremellomycetes</i> | -0.104178131 | 0.177679267 | 0.872371283  |
| g <i>Phascolarctobacterium</i> A | g <i>Candida</i>                      | -0.097495434 | 0.207294256 | 0.874689648  |
| g <i>Phascolarctobacterium</i> A | g <i>Cladosporium</i>                 | -0.082472335 | 0.286423485 | 0.891214772  |
| g <i>Phascolarctobacterium</i> A | g <i>Debaryomyces</i>                 | -0.100023296 | 0.195700077 | 0.874689648  |
| g <i>Phascolarctobacterium</i> A | g <i>Aspergillus</i>                  | 0.072554788  | 0.348528067 | 0.900151743  |
| g <i>Phascolarctobacterium</i> A | g <i>Kazachstania</i>                 | 0.00830646   | 0.914642692 | 0.996251765  |
| g <i>Phascolarctobacterium</i> A | g <i>Malassezia</i>                   | 0.015870767  | 0.837727124 | 0.994526835  |
| g <i>Phascolarctobacterium</i> A | g unclassified <i>Fungi</i>           | 0.086093874  | 0.265716297 | 0.878368327  |
| g <i>Phascolarctobacterium</i> A | g <i>Fusarium</i>                     | -0.01723341  | 0.824011763 | 0.992484281  |
| g <i>Phascolarctobacterium</i> A | g <i>Mycosphaerella</i>               | -0.058774786 | 0.447817872 | 0.922019123  |
| g <i>Phascolarctobacterium</i> A | g <i>Simplicillium</i>                | 0.051248001  | 0.508154229 | 0.936546622  |
| g <i>Phascolarctobacterium</i> A | g unclassified <i>Cordycipitaceae</i> | -0.089841044 | 0.24539143  | 0.874689648  |
| g <i>Phascolarctobacterium</i> A | g unidentified                        | 0.054821846  | 0.478990425 | 0.931740764  |
| g MGYG-HGUT-00927                | g <i>Verticillium</i>                 | 0.077788166  | 0.314769218 | 0.898525398  |
| g MGYG-HGUT-00927                | g unclassified <i>Tremellomycetes</i> | 0.058597095  | 0.449194145 | 0.922032734  |
| g MGYG-HGUT-00927                | g <i>Candida</i>                      | -0.046200755 | 0.550860703 | 0.942564508  |
| g MGYG-HGUT-00927                | g <i>Cladosporium</i>                 | 0.087017401  | 0.260603495 | 0.878368327  |
| g MGYG-HGUT-00927                | g <i>Debaryomyces</i>                 | -0.031206431 | 0.687116812 | 0.963892039  |

|                         |                                |              |             |             |
|-------------------------|--------------------------------|--------------|-------------|-------------|
| g MGYG-HGUT-00927       | g Aspergillus                  | 0.024072847  | 0.756051943 | 0.981293944 |
| g MGYG-HGUT-00927       | g Kazachstania                 | 0.035621043  | 0.645672192 | 0.955501166 |
| g MGYG-HGUT-00927       | g Malassezia                   | 0.065559339  | 0.397074503 | 0.909588897 |
| g MGYG-HGUT-00927       | g unclassified_Fungi           | -0.13362654  | 0.083268458 | 0.8415005   |
| g MGYG-HGUT-00927       | g Fusarium                     | 0.001959356  | 0.97982955  | 0.998625698 |
| g MGYG-HGUT-00927       | g Mycosphaerella               | -0.044195913 | 0.568296836 | 0.942564508 |
| g MGYG-HGUT-00927       | g Simplicillium                | 0.151181992  | 0.049754104 | 0.832568254 |
| g MGYG-HGUT-00927       | g unclassified_Cordycipitaceae | 0.003009567  | 0.969022668 | 0.998625698 |
| g MGYG-HGUT-00927       | g unidentified                 | -0.119799008 | 0.12080077  | 0.849176369 |
| g Acidaminococcus       | g Verticillium                 | -0.015474545 | 0.841724587 | 0.994526835 |
| g Acidaminococcus       | g unclassified_Tremellomycetes | -0.035817345 | 0.643853205 | 0.955501166 |
| g Acidaminococcus       | g Candida                      | 0.006340922  | 0.934789042 | 0.996251765 |
| g Acidaminococcus       | g Cladosporium                 | -0.114007964 | 0.139965276 | 0.849249996 |
| g Acidaminococcus       | g Debaryomyces                 | -0.100773944 | 0.192349665 | 0.874689648 |
| g Acidaminococcus       | g Aspergillus                  | -0.054188273 | 0.484093649 | 0.932872225 |
| g Acidaminococcus       | g Kazachstania                 | -0.131515513 | 0.088301911 | 0.8415005   |
| g Acidaminococcus       | g Malassezia                   | -0.029775081 | 0.700764634 | 0.967505184 |
| g Acidaminococcus       | g unclassified_Fungi           | 0.048227735  | 0.533501473 | 0.940891392 |
| g Acidaminococcus       | g Fusarium                     | 0.009962047  | 0.897714817 | 0.995280411 |
| g Acidaminococcus       | g Mycosphaerella               | 0.014661689  | 0.849938005 | 0.994526835 |
| g Acidaminococcus       | g Simplicillium                | -0.050733377 | 0.51242846  | 0.938277062 |
| g Acidaminococcus       | g unclassified_Cordycipitaceae | -0.067260607 | 0.384911192 | 0.906174944 |
| g Acidaminococcus       | g unidentified                 | 0.087567116  | 0.25759241  | 0.877677    |
| g Phascolarctobacterium | g Verticillium                 | -0.011557647 | 0.881443736 | 0.994526835 |
| g Phascolarctobacterium | g unclassified_Tremellomycetes | -0.011122892 | 0.885872512 | 0.994526835 |
| g Phascolarctobacterium | g Candida                      | 0.000368291  | 0.996208263 | 0.999334917 |
| g Phascolarctobacterium | g Cladosporium                 | 0.009765446  | 0.899722737 | 0.995280411 |
| g Phascolarctobacterium | g Debaryomyces                 | 0.06924075   | 0.371041921 | 0.901117392 |
| g Phascolarctobacterium | g Aspergillus                  | 0.119604478  | 0.121409661 | 0.849176369 |
| g Phascolarctobacterium | g Kazachstania                 | -0.020023827 | 0.796095354 | 0.987463135 |
| g Phascolarctobacterium | g Malassezia                   | -0.054666368 | 0.480240052 | 0.932425302 |
| g Phascolarctobacterium | g unclassified_Fungi           | -0.150332225 | 0.051067028 | 0.832568254 |
| g Phascolarctobacterium | g Fusarium                     | -0.065723887 | 0.395888116 | 0.909025558 |
| g Phascolarctobacterium | g Mycosphaerella               | -0.012661957 | 0.870211118 | 0.994526835 |
| g Phascolarctobacterium | g Simplicillium                | -0.021495062 | 0.781477616 | 0.986171666 |
| g Phascolarctobacterium | g unclassified_Cordycipitaceae | -0.007660533 | 0.921257946 | 0.996251765 |
| g Phascolarctobacterium | g unidentified                 | -0.013560038 | 0.861095166 | 0.994526835 |
| g MGYG-HGUT-00782       | g Verticillium                 | 0.054894874  | 0.478404087 | 0.931740764 |
| g MGYG-HGUT-00782       | g unclassified_Tremellomycetes | -0.04880594  | 0.528600392 | 0.940363396 |
| g MGYG-HGUT-00782       | g Candida                      | -0.05900641  | 0.446027453 | 0.921010267 |
| g MGYG-HGUT-00782       | g Cladosporium                 | 0.095830811  | 0.215194023 | 0.874689648 |
| g MGYG-HGUT-00782       | g Debaryomyces                 | 0.107967768  | 0.162337845 | 0.859887758 |
| g MGYG-HGUT-00782       | g Aspergillus                  | -0.03365766  | 0.663979612 | 0.959259869 |
| g MGYG-HGUT-00782       | g Kazachstania                 | -0.03520532  | 0.649531329 | 0.955501166 |
| g MGYG-HGUT-00782       | g Malassezia                   | -0.050401937 | 0.515191053 | 0.938796978 |
| g MGYG-HGUT-00782       | g unclassified_Fungi           | -0.210801689 | 0.005940149 | 0.613926619 |
| g MGYG-HGUT-00782       | g Fusarium                     | -0.024910046 | 0.747848856 | 0.979147232 |
| g MGYG-HGUT-00782       | g Mycosphaerella               | -0.085427398 | 0.269448274 | 0.880885289 |
| g MGYG-HGUT-00782       | g Simplicillium                | 0.076332267  | 0.323939461 | 0.899370541 |
| g MGYG-HGUT-00782       | g unclassified_Cordycipitaceae | -0.050239824 | 0.516545071 | 0.938796978 |
| g MGYG-HGUT-00782       | g unidentified                 | -0.032766575 | 0.672355331 | 0.96129685  |
| g Veillonella           | g Verticillium                 | -0.164429882 | 0.032656077 | 0.805574782 |
| g Veillonella           | g unclassified_Tremellomycetes | 0.079986299  | 0.301247463 | 0.895107599 |
| g Veillonella           | g Candida                      | 0.105033684  | 0.174125592 | 0.869335176 |
| g Veillonella           | g Cladosporium                 | -0.007366244 | 0.924273727 | 0.996251765 |
| g Veillonella           | g Debaryomyces                 | 0.038153338  | 0.62237183  | 0.952309753 |
| g Veillonella           | g Aspergillus                  | 0.024314247  | 0.753683797 | 0.980575998 |
| g Veillonella           | g Kazachstania                 | 0.065753401  | 0.395675542 | 0.909025558 |
| g Veillonella           | g Malassezia                   | -0.0768183   | 0.320859108 | 0.898854824 |
| g Veillonella           | g unclassified_Fungi           | 0.001914213  | 0.980294172 | 0.998625698 |
| g Veillonella           | g Fusarium                     | -0.039992787 | 0.605676853 | 0.950933357 |
| g Veillonella           | g Mycosphaerella               | -0.0024538   | 0.974741046 | 0.998625698 |
| g Veillonella           | g Simplicillium                | 0.000672415  | 0.993077224 | 0.999049974 |
| g Veillonella           | g unclassified_Cordycipitaceae | -0.142124537 | 0.065288906 | 0.836350979 |
| g Veillonella           | g unidentified                 | 0.001034147  | 0.989353232 | 0.999049974 |
| g F0422                 | g Verticillium                 | 0.039815542  | 0.607276869 | 0.950933357 |
| g F0422                 | g unclassified_Tremellomycetes | 0.172956772  | 0.024529974 | 0.765986149 |
| g F0422                 | g Candida                      | -0.032583836 | 0.674078012 | 0.961701261 |
| g F0422                 | g Cladosporium                 | -0.012725346 | 0.869567113 | 0.994526835 |
| g F0422                 | g Debaryomyces                 | 0.060890425  | 0.431615182 | 0.918239588 |
| g F0422                 | g Aspergillus                  | 0.09036704   | 0.242627319 | 0.874689648 |
| g F0422                 | g Kazachstania                 | 0.099631866  | 0.197463891 | 0.874689648 |
| g F0422                 | g Malassezia                   | 0.088450796  | 0.252802305 | 0.874689648 |
| g F0422                 | g unclassified_Fungi           | 0.069932399  | 0.366270845 | 0.901117392 |
| g F0422                 | g Fusarium                     | 0.012799731  | 0.868811499 | 0.994526835 |
| g F0422                 | g Mycosphaerella               | -0.060491001 | 0.434648138 | 0.918896361 |
| g F0422                 | g Simplicillium                | 0.024851405  | 0.748422532 | 0.979147232 |
| g F0422                 | g unclassified_Cordycipitaceae | 0.001967629  | 0.9797444   | 0.998625698 |



|                 |                                |              |             |             |
|-----------------|--------------------------------|--------------|-------------|-------------|
| g F0422         | g unidentified                 | -0.03604885  | 0.641710728 | 0.955341199 |
| g Veillonella A | g Verticillium                 | -0.011833445 | 0.878636117 | 0.994526835 |
| g Veillonella A | g unclassified Tremellomycetes | 0.050553928  | 0.513923236 | 0.938277062 |
| g Veillonella A | g Candida                      | -0.011267818 | 0.884395775 | 0.994526835 |
| g Veillonella A | g Cladosporium                 | 0.021746333  | 0.778988542 | 0.985246269 |
| g Veillonella A | g Debaromyces                  | 0.039864766  | 0.606832329 | 0.950933357 |
| g Veillonella A | g Aspergillus                  | 0.033878151  | 0.66191347  | 0.959259869 |
| g Veillonella A | g Kazachstania                 | 0.107669849  | 0.163506793 | 0.860247571 |
| g Veillonella A | g Malassezia                   | 0.016516431  | 0.83122198  | 0.994526835 |
| g Veillonella A | g unclassified Fungi           | -0.003196793 | 0.967096615 | 0.998625698 |
| g Veillonella A | g Fusarium                     | 0.003508265  | 0.963892824 | 0.998529304 |
| g Veillonella A | g Mycosphaerella               | -0.009781982 | 0.89955383  | 0.995280411 |
| g Veillonella A | g Simplicillium                | -0.074633437 | 0.334855636 | 0.900151743 |
| g Veillonella A | g unclassified Cordycipitaceae | -0.008239947 | 0.915323628 | 0.996251765 |
| g Veillonella A | g unidentified                 | 0.064537385  | 0.404490211 | 0.912338681 |
| g Allisonella   | g Verticillium                 | -0.111533029 | 0.148829945 | 0.849249996 |
| g Allisonella   | g unclassified Tremellomycetes | -0.079097236 | 0.306669628 | 0.897967316 |
| g Allisonella   | g Candida                      | -0.026434003 | 0.732989729 | 0.973693103 |
| g Allisonella   | g Cladosporium                 | -0.063805484 | 0.409851281 | 0.913116876 |
| g Allisonella   | g Debaromyces                  | -0.005080736 | 0.947728303 | 0.996925697 |
| g Allisonella   | g Aspergillus                  | 0.049033884  | 0.526674516 | 0.940363396 |
| g Allisonella   | g Kazachstania                 | -0.024909842 | 0.747850853 | 0.979147232 |
| g Allisonella   | g Malassezia                   | -0.059145157 | 0.444956893 | 0.921010267 |
| g Allisonella   | g unclassified Fungi           | 0.026606382  | 0.731315079 | 0.973693103 |
| g Allisonella   | g Fusarium                     | -0.056060278 | 0.4690999   | 0.928769554 |
| g Allisonella   | g Mycosphaerella               | -0.019800509 | 0.798320527 | 0.987463135 |
| g Allisonella   | g Simplicillium                | -0.069937308 | 0.36623712  | 0.901117392 |
| g Allisonella   | g unclassified Cordycipitaceae | -0.088219887 | 0.254047998 | 0.874689648 |
| g Allisonella   | g unidentified                 | 0.068273019  | 0.377781262 | 0.904606345 |
| g Dialister     | g Verticillium                 | -0.052180657 | 0.500455498 | 0.936281889 |
| g Dialister     | g unclassified Tremellomycetes | -0.024890138 | 0.748043602 | 0.979147232 |
| g Dialister     | g Candida                      | 0.013101536  | 0.86574697  | 0.994526835 |
| g Dialister     | g Cladosporium                 | -0.025356129 | 0.743489493 | 0.978404143 |
| g Dialister     | g Debaromyces                  | 0.029986479  | 0.698742801 | 0.967505184 |
| g Dialister     | g Aspergillus                  | -0.070631431 | 0.361487566 | 0.900157702 |
| g Dialister     | g Kazachstania                 | -0.015448693 | 0.84198555  | 0.994526835 |
| g Dialister     | g Malassezia                   | -0.09633026  | 0.212801554 | 0.874689648 |
| g Dialister     | g unclassified Fungi           | 0.152168398  | 0.04826537  | 0.832568254 |
| g Dialister     | g Fusarium                     | -0.055437109 | 0.474062687 | 0.929115207 |
| g Dialister     | g Mycosphaerella               | 0.026876431  | 0.728694118 | 0.973108701 |
| g Dialister     | g Simplicillium                | -0.025609571 | 0.741016332 | 0.977217936 |
| g Dialister     | g unclassified Cordycipitaceae | -0.132787096 | 0.085241692 | 0.8415005   |
| g Dialister     | g unidentified                 | 0.100866732  | 0.19193844  | 0.874689648 |
| g UBA1822       | g Verticillium                 | 0.045968406  | 0.552868007 | 0.942564508 |
| g UBA1822       | g unclassified Tremellomycetes | -0.040334922 | 0.602593663 | 0.95025211  |
| g UBA1822       | g Candida                      | 0.006178302  | 0.936457894 | 0.996251765 |
| g UBA1822       | g Cladosporium                 | 0.061284604  | 0.428634    | 0.918239588 |
| g UBA1822       | g Debaromyces                  | -0.092104512 | 0.233651393 | 0.874689648 |
| g UBA1822       | g Aspergillus                  | -0.02207773  | 0.775709187 | 0.984510076 |
| g UBA1822       | g Kazachstania                 | -0.161176514 | 0.036308909 | 0.808354944 |
| g UBA1822       | g Malassezia                   | -0.127980688 | 0.097271623 | 0.8415005   |
| g UBA1822       | g unclassified Fungi           | 0.06254463   | 0.419184409 | 0.916661525 |
| g UBA1822       | g Fusarium                     | -0.048708651 | 0.52942345  | 0.940412658 |
| g UBA1822       | g Mycosphaerella               | 0.03258101   | 0.67410467  | 0.961701261 |
| g UBA1822       | g Simplicillium                | -0.063014736 | 0.415690178 | 0.916186713 |
| g UBA1822       | g unclassified Cordycipitaceae | 0.0343344    | 0.657646224 | 0.956614192 |
| g UBA1822       | g unidentified                 | -0.034587932 | 0.655279733 | 0.956614192 |
| g Megasphaera   | g Verticillium                 | -0.124499208 | 0.106796935 | 0.843328451 |
| g Megasphaera   | g unclassified Tremellomycetes | -0.137582939 | 0.074456736 | 0.8415005   |
| g Megasphaera   | g Candida                      | -0.019708859 | 0.799234204 | 0.987463135 |
| g Megasphaera   | g Cladosporium                 | -0.134310639 | 0.081687646 | 0.8415005   |
| g Megasphaera   | g Debaromyces                  | 0.006110087  | 0.937158018 | 0.996251765 |
| g Megasphaera   | g Aspergillus                  | -0.034956794 | 0.651842859 | 0.955597379 |
| g Megasphaera   | g Kazachstania                 | -0.131044223 | 0.089458177 | 0.8415005   |
| g Megasphaera   | g Malassezia                   | -0.126539448 | 0.101129827 | 0.8415005   |
| g Megasphaera   | g unclassified Fungi           | 0.019138958  | 0.804921763 | 0.988868764 |
| g Megasphaera   | g Fusarium                     | -0.083071333 | 0.282925999 | 0.8902203   |
| g Megasphaera   | g Mycosphaerella               | -0.036618733 | 0.636449316 | 0.954338328 |
| g Megasphaera   | g Simplicillium                | -0.035241411 | 0.649195931 | 0.955501166 |
| g Megasphaera   | g unclassified Cordycipitaceae | -0.113490466 | 0.141784731 | 0.849249996 |
| g Megasphaera   | g unidentified                 | 0.047747275  | 0.537591268 | 0.941323418 |
| g Caecibacter   | g Verticillium                 | -0.023558081 | 0.761109373 | 0.982076388 |
| g Caecibacter   | g unclassified Tremellomycetes | -0.081090463 | 0.294602072 | 0.892181547 |
| g Caecibacter   | g Candida                      | -0.002203117 | 0.977320803 | 0.998625698 |
| g Caecibacter   | g Cladosporium                 | -0.107298162 | 0.164973987 | 0.864354699 |
| g Caecibacter   | g Debaromyces                  | 0.009405078  | 0.903404891 | 0.995280411 |
| g Caecibacter   | g Aspergillus                  | -0.073777053 | 0.340446517 | 0.900151743 |
| g Caecibacter   | g Kazachstania                 | -0.038025247 | 0.623541733 | 0.952309753 |

|                   |                                |              |             |             |
|-------------------|--------------------------------|--------------|-------------|-------------|
| g Caecibacter     | g Malassezia                   | -0.091356717 | 0.237485555 | 0.874689648 |
| g Caecibacter     | g unclassified Fungi           | -0.007570434 | 0.922181133 | 0.996251765 |
| g Caecibacter     | g Fusarium                     | -0.089654842 | 0.246375144 | 0.874689648 |
| g Caecibacter     | g Mycosphaerella               | -0.012113325 | 0.875788492 | 0.994526835 |
| g Caecibacter     | g Simplicillium                | -0.013404028 | 0.862677467 | 0.994526835 |
| g Caecibacter     | g unclassified Cordycipitaceae | -0.092757383 | 0.23033967  | 0.874689648 |
| g Caecibacter     | g unidentified                 | 0.053411008  | 0.490393948 | 0.932872225 |
| g Anaeroglobus    | g Verticillium                 | -0.197564608 | 0.010032504 | 0.613926619 |
| g Anaeroglobus    | g unclassified Tremellomycetes | 0.103328388  | 0.181261495 | 0.872371283 |
| g Anaeroglobus    | g Candida                      | 0.192580884  | 0.01212458  | 0.659702633 |
| g Anaeroglobus    | g Cladosporium                 | -0.024919472 | 0.747756661 | 0.979147232 |
| g Anaeroglobus    | g Debaromyces                  | -0.047650182 | 0.538419644 | 0.941341603 |
| g Anaeroglobus    | g Aspergillus                  | -0.039295002 | 0.611986631 | 0.951172976 |
| g Anaeroglobus    | g Kazachstania                 | -0.005529096 | 0.943122924 | 0.996925697 |
| g Anaeroglobus    | g Malassezia                   | -0.069213266 | 0.371232297 | 0.901117392 |
| g Anaeroglobus    | g unclassified Fungi           | 0.035026326  | 0.651195811 | 0.955597379 |
| g Anaeroglobus    | g Fusarium                     | 0.010110427  | 0.896199803 | 0.995214763 |
| g Anaeroglobus    | g Mycosphaerella               | -0.011401267 | 0.883036334 | 0.994526835 |
| g Anaeroglobus    | g Simplicillium                | -0.098151326 | 0.204239581 | 0.874689648 |
| g Anaeroglobus    | g unclassified Cordycipitaceae | -0.205864911 | 0.007248519 | 0.613926619 |
| g Anaeroglobus    | g unidentified                 | 0.03436182   | 0.657390121 | 0.956614192 |
| g Megamonas       | g Verticillium                 | 0.028325591  | 0.714683628 | 0.970380158 |
| g Megamonas       | g unclassified Tremellomycetes | 0.130510063  | 0.090783264 | 0.8415005   |
| g Megamonas       | g Candida                      | 0.052604995  | 0.49697314  | 0.935069491 |
| g Megamonas       | g Cladosporium                 | 0.040330154  | 0.602636581 | 0.95025211  |
| g Megamonas       | g Debaromyces                  | 0.060045663  | 0.43804407  | 0.919726905 |
| g Megamonas       | g Aspergillus                  | 0.112999384  | 0.143527906 | 0.849249996 |
| g Megamonas       | g Kazachstania                 | 0.036761308  | 0.635135824 | 0.954116909 |
| g Megamonas       | g Malassezia                   | 0.011041828  | 0.886698692 | 0.994526835 |
| g Megamonas       | g unclassified Fungi           | -0.188788273 | 0.01396436  | 0.702895198 |
| g Megamonas       | g Fusarium                     | -0.029059624 | 0.707622838 | 0.968480686 |
| g Megamonas       | g Mycosphaerella               | 0.01581854   | 0.838253807 | 0.994526835 |
| g Megamonas       | g Simplicillium                | 0.080078344  | 0.300689745 | 0.894026295 |
| g Megamonas       | g unclassified Cordycipitaceae | 0.028016027  | 0.717668694 | 0.97067915  |
| g Megamonas       | g unidentified                 | -0.181101473 | 0.01845479  | 0.702895198 |
| g Selenomonas A   | g Verticillium                 | -0.009216771 | 0.905329796 | 0.995657731 |
| g Selenomonas A   | g unclassified Tremellomycetes | 0.045537471  | 0.55660033  | 0.942564508 |
| g Selenomonas A   | g Candida                      | -0.04939494  | 0.523631269 | 0.939740222 |
| g Selenomonas A   | g Cladosporium                 | -0.020554458 | 0.790814695 | 0.986710331 |
| g Selenomonas A   | g Debaromyces                  | -0.012494737 | 0.871910402 | 0.994526835 |
| g Selenomonas A   | g Aspergillus                  | -0.070294437 | 0.363788659 | 0.901117392 |
| g Selenomonas A   | g Kazachstania                 | 0.098767174  | 0.201401069 | 0.874689648 |
| g Selenomonas A   | g Malassezia                   | 0.007059697  | 0.927416264 | 0.996251765 |
| g Selenomonas A   | g unclassified Fungi           | -0.090434521 | 0.242274284 | 0.874689648 |
| g Selenomonas A   | g Fusarium                     | -0.026712324 | 0.73028648  | 0.973504271 |
| g Selenomonas A   | g Mycosphaerella               | -0.109118973 | 0.157879546 | 0.855241398 |
| g Selenomonas A   | g Simplicillium                | 0.010800201  | 0.889162014 | 0.994639994 |
| g Selenomonas A   | g unclassified Cordycipitaceae | -0.005656779 | 0.941811742 | 0.996925697 |
| g Selenomonas A   | g unidentified                 | -0.009851642 | 0.898842319 | 0.995280411 |
| g Anaerovibrio    | g Verticillium                 | 0.002476704  | 0.974505358 | 0.998625698 |
| g Anaerovibrio    | g unclassified Tremellomycetes | -0.097828405 | 0.205739432 | 0.874689648 |
| g Anaerovibrio    | g Candida                      | -0.078034716 | 0.313233189 | 0.898307298 |
| g Anaerovibrio    | g Cladosporium                 | -0.015858417 | 0.837851659 | 0.994526835 |
| g Anaerovibrio    | g Debaromyces                  | -0.180971156 | 0.018540632 | 0.702895198 |
| g Anaerovibrio    | g Aspergillus                  | -0.092558421 | 0.231345395 | 0.874689648 |
| g Anaerovibrio    | g Kazachstania                 | -0.043209843 | 0.57696758  | 0.943618965 |
| g Anaerovibrio    | g Malassezia                   | -0.04342625  | 0.575059382 | 0.943352947 |
| g Anaerovibrio    | g unclassified Fungi           | 0.001766058  | 0.981819083 | 0.998625698 |
| g Anaerovibrio    | g Fusarium                     | -0.032804755 | 0.671995626 | 0.96129685  |
| g Anaerovibrio    | g Mycosphaerella               | -0.099892946 | 0.196286167 | 0.874689648 |
| g Anaerovibrio    | g Simplicillium                | 0.029421516  | 0.704150849 | 0.967508066 |
| g Anaerovibrio    | g unclassified Cordycipitaceae | -0.082413231 | 0.286770152 | 0.891214772 |
| g Anaerovibrio    | g unidentified                 | 0.037438873  | 0.62890927  | 0.953713015 |
| g Mitsuokella     | g Verticillium                 | -0.077290445 | 0.317884991 | 0.898525398 |
| g Mitsuokella     | g unclassified Tremellomycetes | -0.100344569 | 0.194260968 | 0.874689648 |
| g Mitsuokella     | g Candida                      | 0.010813143  | 0.889030042 | 0.994639994 |
| g Mitsuokella     | g Cladosporium                 | -0.075665286 | 0.328197584 | 0.899370541 |
| g Mitsuokella     | g Debaromyces                  | -0.012751761 | 0.86929877  | 0.994526835 |
| g Mitsuokella     | g Aspergillus                  | -0.059728462 | 0.440472081 | 0.920035188 |
| g Mitsuokella     | g Kazachstania                 | -0.115231332 | 0.135734909 | 0.849249996 |
| g Mitsuokella     | g Malassezia                   | -0.082628504 | 0.285508858 | 0.891214772 |
| g Mitsuokella     | g unclassified Fungi           | 0.067698905  | 0.38181452  | 0.90490297  |
| g Mitsuokella     | g Fusarium                     | -0.118874456 | 0.123715918 | 0.849176369 |
| g Mitsuokella     | g Mycosphaerella               | 0.007604606  | 0.921830988 | 0.996251765 |
| g Mitsuokella     | g Simplicillium                | -0.065995099 | 0.393937323 | 0.907694413 |
| g Mitsuokella     | g unclassified Cordycipitaceae | -0.144971016 | 0.060028657 | 0.832568254 |
| g Mitsuokella     | g unidentified                 | 0.119228716  | 0.122592557 | 0.849176369 |
| g MGYG-HGUT-03475 | g Verticillium                 | -0.029301245 | 0.705304052 | 0.967508066 |

|                   |                                |              |             |             |
|-------------------|--------------------------------|--------------|-------------|-------------|
| g MGYG-HGUT-03475 | g unclassified Tremellomycetes | -0.167917899 | 0.029091044 | 0.780931419 |
| g MGYG-HGUT-03475 | g Candida                      | -0.013796347 | 0.858699517 | 0.994526835 |
| g MGYG-HGUT-03475 | g Cladosporium                 | -0.070922653 | 0.359506321 | 0.900151743 |
| g MGYG-HGUT-03475 | g Debaryomyces                 | -0.01356427  | 0.861052255 | 0.994526835 |
| g MGYG-HGUT-03475 | g Aspergillus                  | 0.027197493  | 0.725582146 | 0.972631421 |
| g MGYG-HGUT-03475 | g Kazachstania                 | 0.014302406  | 0.85357355  | 0.994526835 |
| g MGYG-HGUT-03475 | g Malassezia                   | -0.028904062 | 0.709117168 | 0.968657831 |
| g MGYG-HGUT-03475 | g unclassified Fungi           | 0.127097443  | 0.099621984 | 0.8415005   |
| g MGYG-HGUT-03475 | g Fusarium                     | -0.016447602 | 0.831914909 | 0.994526835 |
| g MGYG-HGUT-03475 | g Mycosphaerella               | -0.113054395 | 0.143331832 | 0.849249996 |
| g MGYG-HGUT-03475 | g Simplicillium                | 0.033327901  | 0.667074393 | 0.959868552 |
| g MGYG-HGUT-03475 | g unclassified Cordycipitaceae | -0.170422678 | 0.026740608 | 0.765986149 |
| g MGYG-HGUT-03475 | g unidentified                 | 0.111392134  | 0.149347093 | 0.849249996 |
| g Bilophila       | g Verticillium                 | -0.003269244 | 0.966351335 | 0.998625698 |
| g Bilophila       | g unclassified Tremellomycetes | -0.074757868 | 0.334048196 | 0.900151743 |
| g Bilophila       | g Candida                      | -0.053872348 | 0.486649193 | 0.932872225 |
| g Bilophila       | g Cladosporium                 | -0.034901089 | 0.652361423 | 0.955763754 |
| g Bilophila       | g Debaryomyces                 | 0.123459808  | 0.109778402 | 0.843328451 |
| g Bilophila       | g Aspergillus                  | 0.047541514  | 0.539347519 | 0.941536464 |
| g Bilophila       | g Kazachstania                 | -0.11188738  | 0.147535303 | 0.849249996 |
| g Bilophila       | g Malassezia                   | -0.006797214 | 0.930107984 | 0.996251765 |
| g Bilophila       | g unclassified Fungi           | -0.129488949 | 0.093359839 | 0.8415005   |
| g Bilophila       | g Fusarium                     | -0.051436005 | 0.506597384 | 0.936546622 |
| g Bilophila       | g Mycosphaerella               | -0.017255773 | 0.823787099 | 0.992484281 |
| g Bilophila       | g Simplicillium                | 0.069289566  | 0.370703935 | 0.901117392 |
| g Bilophila       | g unclassified Cordycipitaceae | 0.015059435  | 0.845916949 | 0.994526835 |
| g Bilophila       | g unidentified                 | -0.041400389 | 0.593037245 | 0.947273049 |
| g Desulfovibrio   | g Verticillium                 | -0.00636863  | 0.934504724 | 0.996251765 |
| g Desulfovibrio   | g unclassified Tremellomycetes | -0.126945513 | 0.100030763 | 0.8415005   |
| g Desulfovibrio   | g Candida                      | -0.087082785 | 0.260244094 | 0.878368327 |
| g Desulfovibrio   | g Cladosporium                 | -0.079769972 | 0.302560925 | 0.896705453 |
| g Desulfovibrio   | g Debaryomyces                 | -0.095245789 | 0.218020756 | 0.874689648 |
| g Desulfovibrio   | g Aspergillus                  | 0.095182324  | 0.218328994 | 0.874689648 |
| g Desulfovibrio   | g Kazachstania                 | -0.121072062 | 0.1168743   | 0.847040293 |
| g Desulfovibrio   | g Malassezia                   | -0.060608989 | 0.433750949 | 0.918239588 |
| g Desulfovibrio   | g unclassified Fungi           | 0.067784097  | 0.381214384 | 0.90490297  |
| g Desulfovibrio   | g Fusarium                     | -0.064356978 | 0.405807792 | 0.913116876 |
| g Desulfovibrio   | g Mycosphaerella               | -0.094984111 | 0.219293668 | 0.874689648 |
| g Desulfovibrio   | g Simplicillium                | 0.06110117   | 0.430019837 | 0.918239588 |
| g Desulfovibrio   | g unclassified Cordycipitaceae | -0.0498855   | 0.51951084  | 0.939250598 |
| g Desulfovibrio   | g unidentified                 | 0.074489415  | 0.335791755 | 0.900151743 |
| g Mailhella       | g Verticillium                 | 0.093037592  | 0.228928488 | 0.874689648 |
| g Mailhella       | g unclassified Tremellomycetes | -0.070975531 | 0.359147307 | 0.900151743 |
| g Mailhella       | g Candida                      | -0.035285102 | 0.648789995 | 0.955501166 |
| g Mailhella       | g Cladosporium                 | -0.017248164 | 0.823863535 | 0.992484281 |
| g Mailhella       | g Debaryomyces                 | -0.026905255 | 0.728414554 | 0.973108701 |
| g Mailhella       | g Aspergillus                  | 0.131155926  | 0.089183038 | 0.8415005   |
| g Mailhella       | g Kazachstania                 | -0.075979079 | 0.326189815 | 0.899370541 |
| g Mailhella       | g Malassezia                   | 0.051234164  | 0.508268907 | 0.936546622 |
| g Mailhella       | g unclassified Fungi           | -0.077371155 | 0.317378383 | 0.898525398 |
| g Mailhella       | g Fusarium                     | 0.066622177  | 0.389448976 | 0.90756662  |
| g Mailhella       | g Mycosphaerella               | -0.062696389 | 0.418054536 | 0.916661525 |
| g Mailhella       | g Simplicillium                | 0.111803288  | 0.147841762 | 0.849249996 |
| g Mailhella       | g unclassified Cordycipitaceae | -0.05642532  | 0.466206059 | 0.927602832 |
| g Mailhella       | g unidentified                 | -0.003516969 | 0.963803299 | 0.998529304 |
| g Enterococcus B  | g Verticillium                 | 0.019104557  | 0.805265416 | 0.988960513 |
| g Enterococcus B  | g unclassified Tremellomycetes | 9.93E-07     | 0.99998978  | 0.99998978  |
| g Enterococcus B  | g Candida                      | 0.043823805  | 0.571561606 | 0.942564508 |
| g Enterococcus B  | g Cladosporium                 | -0.051887063 | 0.502872378 | 0.936281889 |
| g Enterococcus B  | g Debaryomyces                 | 0.049640195  | 0.521569195 | 0.939740222 |
| g Enterococcus B  | g Aspergillus                  | 0.030603113  | 0.692857396 | 0.966086731 |
| g Enterococcus B  | g Kazachstania                 | -0.066070563 | 0.393395554 | 0.907694413 |
| g Enterococcus B  | g Malassezia                   | -0.079416788 | 0.304713434 | 0.897967316 |
| g Enterococcus B  | g unclassified Fungi           | -0.141135132 | 0.067203262 | 0.836350979 |
| g Enterococcus B  | g Fusarium                     | -0.121253019 | 0.116324332 | 0.846378773 |
| g Enterococcus B  | g Mycosphaerella               | 0.012610244  | 0.870736559 | 0.994526835 |
| g Enterococcus B  | g Simplicillium                | -0.003414814 | 0.964853995 | 0.998625698 |
| g Enterococcus B  | g unclassified Cordycipitaceae | -0.043517416 | 0.574256399 | 0.943352947 |
| g Enterococcus B  | g unidentified                 | -0.002016123 | 0.979245288 | 0.998625698 |
| g Enterococcus A  | g Verticillium                 | -0.015161432 | 0.844886432 | 0.994526835 |
| g Enterococcus A  | g unclassified Tremellomycetes | 0.084011553  | 0.277494215 | 0.88925378  |
| g Enterococcus A  | g Candida                      | 0.03116448   | 0.687515402 | 0.964084767 |
| g Enterococcus A  | g Cladosporium                 | -0.088555617 | 0.252238218 | 0.874689648 |
| g Enterococcus A  | g Debaryomyces                 | -0.045416243 | 0.557652469 | 0.942564508 |
| g Enterococcus A  | g Aspergillus                  | 0.042605651  | 0.582310728 | 0.944873255 |
| g Enterococcus A  | g Kazachstania                 | -0.02589239  | 0.738259627 | 0.976420387 |
| g Enterococcus A  | g Malassezia                   | -0.078682563 | 0.309220385 | 0.897967316 |
| g Enterococcus A  | g unclassified Fungi           | -0.153659049 | 0.046086098 | 0.827218559 |

|                   |                                |              |             |             |
|-------------------|--------------------------------|--------------|-------------|-------------|
| g Enterococcus A  | g Fusarium                     | -0.134440713 | 0.081389819 | 0.8415005   |
| g Enterococcus A  | g Mycosphaerella               | 0.065284043  | 0.39906412  | 0.909588897 |
| g Enterococcus A  | g Simplicillium                | -0.012614017 | 0.870698218 | 0.994526835 |
| g Enterococcus A  | g unclassified Cordycipitaceae | 0.02110011   | 0.785394464 | 0.986710331 |
| g Enterococcus A  | g unidentified                 | -0.078580092 | 0.309852847 | 0.897967316 |
| g Enterococcus D  | g Verticillium                 | 0.041370026  | 0.593308623 | 0.947273049 |
| g Enterococcus D  | g unclassified Tremellomycetes | 0.065209448  | 0.399604252 | 0.909828919 |
| g Enterococcus D  | g Candida                      | 0.11676198   | 0.130580627 | 0.849249996 |
| g Enterococcus D  | g Cladosporium                 | -0.045927053 | 0.553225643 | 0.942564508 |
| g Enterococcus D  | g Debaromyces                  | 0.124308368  | 0.10733953  | 0.843328451 |
| g Enterococcus D  | g Aspergillus                  | -0.002912005 | 0.97002639  | 0.998625698 |
| g Enterococcus D  | g Kazachstania                 | 0.074912147  | 0.333048805 | 0.900151743 |
| g Enterococcus D  | g Malassezia                   | -0.038330786 | 0.620752697 | 0.952309753 |
| g Enterococcus D  | g unclassified Fungi           | -0.086335309 | 0.264373115 | 0.878368327 |
| g Enterococcus D  | g Fusarium                     | -0.093354943 | 0.227337629 | 0.874689648 |
| g Enterococcus D  | g Mycosphaerella               | -0.024347337 | 0.753359364 | 0.980575998 |
| g Enterococcus D  | g Simplicillium                | 0.0122584    | 0.874313057 | 0.994526835 |
| g Enterococcus D  | g unclassified Cordycipitaceae | -0.068198216 | 0.37830529  | 0.904750985 |
| g Enterococcus D  | g unidentified                 | -0.04599113  | 0.55267154  | 0.942564508 |
| g Enterococcus    | g Verticillium                 | -0.095179168 | 0.21834433  | 0.874689648 |
| g Enterococcus    | g unclassified Tremellomycetes | 0.000404993  | 0.995833048 | 0.999079093 |
| g Enterococcus    | g Candida                      | -0.014679654 | 0.849756302 | 0.994526835 |
| g Enterococcus    | g Cladosporium                 | -0.076782347 | 0.321086313 | 0.898854824 |
| g Enterococcus    | g Debaromyces                  | 0.020463281  | 0.791721391 | 0.986710331 |
| g Enterococcus    | g Aspergillus                  | 0.015779511  | 0.838647439 | 0.994526835 |
| g Enterococcus    | g Kazachstania                 | 0.097289619  | 0.208259531 | 0.874689648 |
| g Enterococcus    | g Malassezia                   | -0.059012043 | 0.445983963 | 0.921010267 |
| g Enterococcus    | g unclassified Fungi           | -0.108616428 | 0.159814326 | 0.859887758 |
| g Enterococcus    | g Fusarium                     | -0.043377818 | 0.575486178 | 0.943352947 |
| g Enterococcus    | g Mycosphaerella               | -0.012515502 | 0.87169936  | 0.994526835 |
| g Enterococcus    | g Simplicillium                | -0.131426075 | 0.088520416 | 0.8415005   |
| g Enterococcus    | g unclassified Cordycipitaceae | -0.135066215 | 0.079969803 | 0.8415005   |
| g Enterococcus    | g unidentified                 | -0.071008928 | 0.358920674 | 0.900151743 |
| g Streptococcus   | g Verticillium                 | -0.084642948 | 0.273886317 | 0.886311878 |
| g Streptococcus   | g unclassified Tremellomycetes | -0.00669193  | 0.931187871 | 0.996251765 |
| g Streptococcus   | g Candida                      | 0.184641775  | 0.016250999 | 0.702895198 |
| g Streptococcus   | g Cladosporium                 | 0.042053443  | 0.587214097 | 0.947150582 |
| g Streptococcus   | g Debaromyces                  | -0.128863445 | 0.094966673 | 0.8415005   |
| g Streptococcus   | g Aspergillus                  | 0.103483363  | 0.180604242 | 0.872371283 |
| g Streptococcus   | g Kazachstania                 | 0.151259664  | 0.049635509 | 0.832568254 |
| g Streptococcus   | g Malassezia                   | -0.037683873 | 0.626664205 | 0.952865795 |
| g Streptococcus   | g unclassified Fungi           | 0.088834006  | 0.250744304 | 0.874689648 |
| g Streptococcus   | g Fusarium                     | -0.044903077 | 0.562116845 | 0.942564508 |
| g Streptococcus   | g Mycosphaerella               | -0.001332337 | 0.986283575 | 0.999049974 |
| g Streptococcus   | g Simplicillium                | -0.019844556 | 0.797881505 | 0.987463135 |
| g Streptococcus   | g unclassified Cordycipitaceae | -0.060865203 | 0.431806342 | 0.918239588 |
| g Streptococcus   | g unidentified                 | 0.060161883  | 0.437156379 | 0.919176572 |
| g Lactococcus     | g Verticillium                 | -0.044562507 | 0.565089105 | 0.942564508 |
| g Lactococcus     | g unclassified Tremellomycetes | 0.114834996  | 0.137094571 | 0.849249996 |
| g Lactococcus     | g Candida                      | 0.070288949  | 0.363826207 | 0.901117392 |
| g Lactococcus     | g Cladosporium                 | -0.058574393 | 0.449370151 | 0.922032734 |
| g Lactococcus     | g Debaromyces                  | -0.033799326 | 0.662651822 | 0.959259869 |
| g Lactococcus     | g Aspergillus                  | 0.1722345    | 0.025143463 | 0.765986149 |
| g Lactococcus     | g Kazachstania                 | -0.012218928 | 0.874714451 | 0.994526835 |
| g Lactococcus     | g Malassezia                   | -0.066809386 | 0.38811502  | 0.907127903 |
| g Lactococcus     | g unclassified Fungi           | 0.03193659   | 0.680193191 | 0.963380777 |
| g Lactococcus     | g Fusarium                     | -0.062308675 | 0.420944661 | 0.916661525 |
| g Lactococcus     | g Mycosphaerella               | -0.100672193 | 0.192801352 | 0.874689648 |
| g Lactococcus     | g Simplicillium                | 0.046190544  | 0.550948839 | 0.942564508 |
| g Lactococcus     | g unclassified Cordycipitaceae | -0.006024345 | 0.938038097 | 0.996251765 |
| g Lactococcus     | g unidentified                 | -0.134058718 | 0.082266954 | 0.8415005   |
| g Lactobacillus H | g Verticillium                 | -0.168083338 | 0.028930539 | 0.780931419 |
| g Lactobacillus H | g unclassified Tremellomycetes | 0.002707872  | 0.972126678 | 0.998625698 |
| g Lactobacillus H | g Candida                      | 0.155763792  | 0.043149388 | 0.812441332 |
| g Lactobacillus H | g Cladosporium                 | -0.040940948 | 0.597149638 | 0.948155743 |
| g Lactobacillus H | g Debaromyces                  | -0.114841163 | 0.137073338 | 0.849249996 |
| g Lactobacillus H | g Aspergillus                  | 0.089474371  | 0.247331196 | 0.874689648 |
| g Lactobacillus H | g Kazachstania                 | 0.106126072  | 0.169665    | 0.865779476 |
| g Lactobacillus H | g Malassezia                   | 0.024479942  | 0.752059658 | 0.980278684 |
| g Lactobacillus H | g unclassified Fungi           | 0.021978306  | 0.776692624 | 0.984510076 |
| g Lactobacillus H | g Fusarium                     | -0.021514189 | 0.781288075 | 0.986171666 |
| g Lactobacillus H | g Mycosphaerella               | -0.082045504 | 0.288933294 | 0.891214772 |
| g Lactobacillus H | g Simplicillium                | 0.023346315  | 0.76319287  | 0.982076388 |
| g Lactobacillus H | g unclassified Cordycipitaceae | -0.032962123 | 0.670513789 | 0.96129685  |
| g Lactobacillus H | g unidentified                 | 0.074509362  | 0.335662004 | 0.900151743 |
| g Lactobacillus B | g Verticillium                 | -0.255131154 | 0.000814954 | 0.534709451 |
| g Lactobacillus B | g unclassified Tremellomycetes | -0.036581834 | 0.636789439 | 0.954338328 |
| g Lactobacillus B | g Candida                      | 0.08654642   | 0.263202438 | 0.878368327 |



|                   |                                |              |             |             |
|-------------------|--------------------------------|--------------|-------------|-------------|
| g Lactobacillus B | g Cladosporium                 | -0.064530718 | 0.404538857 | 0.912338681 |
| g Lactobacillus B | g Debaryomyces                 | -0.035452761 | 0.647233215 | 0.955501166 |
| g Lactobacillus B | g Aspergillus                  | 0.129817242  | 0.092525192 | 0.8415005   |
| g Lactobacillus B | g Kazachstania                 | 0.184781807  | 0.016168757 | 0.702895198 |
| g Lactobacillus B | g Malassezia                   | -0.06722484  | 0.385164568 | 0.906174944 |
| g Lactobacillus B | g unclassified Fungi           | 0.011523458  | 0.881791876 | 0.994526835 |
| g Lactobacillus B | g Fusarium                     | -0.071303723 | 0.356924051 | 0.900151743 |
| g Lactobacillus B | g Mycosphaerella               | -0.133372994 | 0.083860552 | 0.8415005   |
| g Lactobacillus B | g Simplicillium                | -0.004092679 | 0.957883157 | 0.997257748 |
| g Lactobacillus B | g unclassified Cordycipitaceae | -0.172913902 | 0.024566025 | 0.765986149 |
| g Lactobacillus B | g unidentified                 | 0.128206076  | 0.096678944 | 0.8415005   |
| g Weissella       | g Verticillium                 | 0.015231684  | 0.844176801 | 0.994526835 |
| g Weissella       | g unclassified Tremellomycetes | 0.085833554  | 0.267169756 | 0.878755142 |
| g Weissella       | g Candida                      | 0.012579521  | 0.87104876  | 0.994526835 |
| g Weissella       | g Cladosporium                 | -0.020724415 | 0.789125347 | 0.986710331 |
| g Weissella       | g Debaryomyces                 | -0.027140121 | 0.726137909 | 0.972631421 |
| g Weissella       | g Aspergillus                  | -0.045385486 | 0.557919566 | 0.942564508 |
| g Weissella       | g Kazachstania                 | 0.01023734   | 0.894904284 | 0.995135868 |
| g Weissella       | g Malassezia                   | -0.005350022 | 0.944962081 | 0.996925697 |
| g Weissella       | g unclassified Fungi           | -0.180884491 | 0.018597911 | 0.702895198 |
| g Weissella       | g Fusarium                     | 0.06009245   | 0.437686586 | 0.919726905 |
| g Weissella       | g Mycosphaerella               | 0.048712452  | 0.529391282 | 0.940412658 |
| g Weissella       | g Simplicillium                | -0.036205485 | 0.64026281  | 0.955341199 |
| g Weissella       | g unclassified Cordycipitaceae | -0.054773377 | 0.479379797 | 0.9318917   |
| g Weissella       | g unidentified                 | 0.040399769  | 0.602010072 | 0.949974496 |
| g Lactobacillus   | g Verticillium                 | -0.208240437 | 0.006589967 | 0.613926619 |
| g Lactobacillus   | g unclassified Tremellomycetes | 0.043036001  | 0.578502598 | 0.944119536 |
| g Lactobacillus   | g Candida                      | 0.093959487  | 0.22432873  | 0.874689648 |
| g Lactobacillus   | g Cladosporium                 | -0.035434365 | 0.647403955 | 0.955501166 |
| g Lactobacillus   | g Debaryomyces                 | -0.132821159 | 0.0851609   | 0.8415005   |
| g Lactobacillus   | g Aspergillus                  | 0.074907915  | 0.333076189 | 0.900151743 |
| g Lactobacillus   | g Kazachstania                 | 0.098856463  | 0.200991904 | 0.874689648 |
| g Lactobacillus   | g Malassezia                   | -0.094547751 | 0.221428047 | 0.874689648 |
| g Lactobacillus   | g unclassified Fungi           | -0.062909542 | 0.416470591 | 0.916564692 |
| g Lactobacillus   | g Fusarium                     | -0.064312605 | 0.406132251 | 0.913116876 |
| g Lactobacillus   | g Mycosphaerella               | -0.044307317 | 0.567321127 | 0.942564508 |
| g Lactobacillus   | g Simplicillium                | -0.050674924 | 0.512915113 | 0.938277062 |
| g Lactobacillus   | g unclassified Cordycipitaceae | -0.153783217 | 0.045908335 | 0.825673201 |
| g Lactobacillus   | g unidentified                 | 0.085915428  | 0.266712043 | 0.878368327 |
| g Lactobacillus G | g Verticillium                 | -0.095938781 | 0.214675204 | 0.874689648 |
| g Lactobacillus G | g unclassified Tremellomycetes | 0.00576509   | 0.940699628 | 0.996925697 |
| g Lactobacillus G | g Candida                      | 0.072999024  | 0.345576934 | 0.900151743 |
| g Lactobacillus G | g Cladosporium                 | -0.072116139 | 0.351457604 | 0.900151743 |
| g Lactobacillus G | g Debaryomyces                 | 0.004111514  | 0.957689509 | 0.997257748 |
| g Lactobacillus G | g Aspergillus                  | 0.11714649   | 0.129309787 | 0.849249996 |
| g Lactobacillus G | g Kazachstania                 | 0.181566422  | 0.018151322 | 0.702895198 |
| g Lactobacillus G | g Malassezia                   | -0.050249163 | 0.516467016 | 0.938796978 |
| g Lactobacillus G | g unclassified Fungi           | -0.004261165 | 0.956151002 | 0.99717368  |
| g Lactobacillus G | g Fusarium                     | -0.03588855  | 0.64319392  | 0.955341199 |
| g Lactobacillus G | g Mycosphaerella               | -0.088557263 | 0.252229367 | 0.874689648 |
| g Lactobacillus G | g Simplicillium                | -0.118887366 | 0.123674842 | 0.849176369 |
| g Lactobacillus G | g unclassified Cordycipitaceae | -0.084084354 | 0.277076591 | 0.888809018 |
| g Lactobacillus G | g unidentified                 | 0.02348936   | 0.761785306 | 0.982076388 |
| g Leuconostoc     | g Verticillium                 | -0.095643873 | 0.216094418 | 0.874689648 |
| g Leuconostoc     | g unclassified Tremellomycetes | 0.07652154   | 0.322737633 | 0.89909104  |
| g Leuconostoc     | g Candida                      | 0.02910754   | 0.707162783 | 0.96831002  |
| g Leuconostoc     | g Cladosporium                 | -0.101489363 | 0.189195572 | 0.873641816 |
| g Leuconostoc     | g Debaryomyces                 | -0.017205068 | 0.824296498 | 0.992684962 |
| g Leuconostoc     | g Aspergillus                  | 0.049733377  | 0.520786811 | 0.939569324 |
| g Leuconostoc     | g Kazachstania                 | 0.080483157  | 0.298244985 | 0.892181547 |
| g Leuconostoc     | g Malassezia                   | -0.083392945 | 0.281060021 | 0.8902203   |
| g Leuconostoc     | g unclassified Fungi           | -0.122261239 | 0.113296935 | 0.843328451 |
| g Leuconostoc     | g Fusarium                     | -0.061063514 | 0.430304647 | 0.918239588 |
| g Leuconostoc     | g Mycosphaerella               | -0.0617643   | 0.425022118 | 0.918239588 |
| g Leuconostoc     | g Simplicillium                | -0.019317588 | 0.803137944 | 0.988396129 |
| g Leuconostoc     | g unclassified Cordycipitaceae | -0.041690976 | 0.590442903 | 0.947252808 |
| g Leuconostoc     | g unidentified                 | 0.021029535  | 0.786094946 | 0.986710331 |
| g Lactobacillus D | g Verticillium                 | -0.119534569 | 0.121629063 | 0.849176369 |
| g Lactobacillus D | g unclassified Tremellomycetes | 0.016477643  | 0.831612457 | 0.994526835 |
| g Lactobacillus D | g Candida                      | 0.084427442  | 0.27511417  | 0.887483682 |
| g Lactobacillus D | g Cladosporium                 | -0.044228973 | 0.568007202 | 0.942564508 |
| g Lactobacillus D | g Debaryomyces                 | 0.013954441  | 0.857097506 | 0.994526835 |
| g Lactobacillus D | g Aspergillus                  | 0.101037117  | 0.191184982 | 0.874689648 |
| g Lactobacillus D | g Kazachstania                 | 0.164640578  | 0.03243067  | 0.802159139 |
| g Lactobacillus D | g Malassezia                   | -0.070286736 | 0.363841348 | 0.901117392 |
| g Lactobacillus D | g unclassified Fungi           | -0.11664027  | 0.130984883 | 0.849249996 |
| g Lactobacillus D | g Fusarium                     | -0.039187357 | 0.612962582 | 0.951172976 |
| g Lactobacillus D | g Mycosphaerella               | -0.137898625 | 0.073787466 | 0.8415005   |

|                   |                                |              |             |             |
|-------------------|--------------------------------|--------------|-------------|-------------|
| g Lactobacillus D | g Simplicillium                | 0.006125794  | 0.936996812 | 0.996251765 |
| g Lactobacillus D | g unclassified Cordycipitaceae | -0.100896912 | 0.191804823 | 0.874689648 |
| g Lactobacillus D | g unidentified                 | -0.122776067 | 0.111774963 | 0.843328451 |
| g Granulicatella  | g Verticillium                 | 0.023053607  | 0.766075524 | 0.982494893 |
| g Granulicatella  | g unclassified Tremellomycetes | -0.047043746 | 0.543607911 | 0.942564508 |
| g Granulicatella  | g Candida                      | 0.059756712  | 0.440255532 | 0.919791111 |
| g Granulicatella  | g Cladosporium                 | -0.110873666 | 0.15126181  | 0.84984956  |
| g Granulicatella  | g Debaromyces                  | -0.069488436 | 0.369328982 | 0.901117392 |
| g Granulicatella  | g Aspergillus                  | 0.055063299  | 0.477053294 | 0.931740764 |
| g Granulicatella  | g Kazachstania                 | 0.041572426  | 0.591500682 | 0.947273049 |
| g Granulicatella  | g Malassezia                   | 0.01769649   | 0.819362609 | 0.992339735 |
| g Granulicatella  | g unclassified Fungi           | 0.026632029  | 0.73106602  | 0.973693103 |
| g Granulicatella  | g Fusarium                     | -0.067907919 | 0.380343138 | 0.90490297  |
| g Granulicatella  | g Mycosphaerella               | 0.095137428  | 0.218547228 | 0.874689648 |
| g Granulicatella  | g Simplicillium                | -0.065425148 | 0.398043584 | 0.909588897 |
| g Granulicatella  | g unclassified Cordycipitaceae | -0.026353887 | 0.733768478 | 0.973693103 |
| g Granulicatella  | g unidentified                 | 0.067211042  | 0.385262333 | 0.906174944 |
| g Absiella        | g Verticillium                 | 0.058552864  | 0.449537094 | 0.922032734 |
| g Absiella        | g unclassified Tremellomycetes | 0.134006169  | 0.082388207 | 0.8415005   |
| g Absiella        | g Candida                      | -0.064083784 | 0.407807858 | 0.913116876 |
| g Absiella        | g Cladosporium                 | -0.009355862 | 0.90390793  | 0.995280411 |
| g Absiella        | g Debaromyces                  | 0.01044624   | 0.892772449 | 0.994724541 |
| g Absiella        | g Aspergillus                  | 0.073331627  | 0.343377765 | 0.900151743 |
| g Absiella        | g Kazachstania                 | -0.043640658 | 0.573171725 | 0.942985175 |
| g Absiella        | g Malassezia                   | 0.017263412  | 0.823710364 | 0.992484281 |
| g Absiella        | g unclassified Fungi           | -0.191688322 | 0.012537251 | 0.663907472 |
| g Absiella        | g Fusarium                     | -0.097610882 | 0.206754213 | 0.874689648 |
| g Absiella        | g Mycosphaerella               | 0.026395879  | 0.733360266 | 0.973693103 |
| g Absiella        | g Simplicillium                | 0.049181118  | 0.525432441 | 0.939740222 |
| g Absiella        | g unclassified Cordycipitaceae | 0.08143148   | 0.292569498 | 0.892181547 |
| g Absiella        | g unidentified                 | -0.091769012 | 0.235366188 | 0.874689648 |
| g Holdemania      | g Verticillium                 | 0.029016253  | 0.70803935  | 0.968657831 |
| g Holdemania      | g unclassified Tremellomycetes | -0.080845203 | 0.296069685 | 0.892181547 |
| g Holdemania      | g Candida                      | -0.104589357 | 0.175964552 | 0.871837921 |
| g Holdemania      | g Cladosporium                 | -0.035945459 | 0.6426672   | 0.955341199 |
| g Holdemania      | g Debaromyces                  | -0.015664299 | 0.839809661 | 0.994526835 |
| g Holdemania      | g Aspergillus                  | -0.016826223 | 0.828104828 | 0.993650851 |
| g Holdemania      | g Kazachstania                 | -0.013522483 | 0.861476007 | 0.994526835 |
| g Holdemania      | g Malassezia                   | 0.095753292  | 0.215567069 | 0.874689648 |
| g Holdemania      | g unclassified Fungi           | -0.06161081  | 0.426175903 | 0.918239588 |
| g Holdemania      | g Fusarium                     | -0.066019927 | 0.393759028 | 0.907694413 |
| g Holdemania      | g Mycosphaerella               | 0.041991325  | 0.587766861 | 0.947150582 |
| g Holdemania      | g Simplicillium                | 0.065686236  | 0.39615939  | 0.909420539 |
| g Holdemania      | g unclassified Cordycipitaceae | 0.034184177  | 0.659050036 | 0.956966684 |
| g Holdemania      | g unidentified                 | 0.082606188  | 0.285639433 | 0.891214772 |
| g Dielma          | g Verticillium                 | 0.029389628  | 0.704456538 | 0.967508066 |
| g Dielma          | g unclassified Tremellomycetes | -0.020806171 | 0.788313041 | 0.986710331 |
| g Dielma          | g Candida                      | 0.040784589  | 0.598552111 | 0.948266952 |
| g Dielma          | g Cladosporium                 | 0.068613445  | 0.375402038 | 0.903077197 |
| g Dielma          | g Debaromyces                  | 0.123279106  | 0.110303326 | 0.843328451 |
| g Dielma          | g Aspergillus                  | 0.089396874  | 0.247742528 | 0.874689648 |
| g Dielma          | g Kazachstania                 | 0.040510881  | 0.601010711 | 0.949616339 |
| g Dielma          | g Malassezia                   | -0.010570992 | 0.891499711 | 0.994653074 |
| g Dielma          | g unclassified Fungi           | -0.008719378 | 0.910416836 | 0.996251765 |
| g Dielma          | g Fusarium                     | -0.129550619 | 0.093202596 | 0.8415005   |
| g Dielma          | g Mycosphaerella               | -0.125696197 | 0.103442624 | 0.841929371 |
| g Dielma          | g Simplicillium                | 0.042636338  | 0.582038799 | 0.944873255 |
| g Dielma          | g unclassified Cordycipitaceae | 0.018146233  | 0.814853377 | 0.991276009 |
| g Dielma          | g unidentified                 | -0.01634306  | 0.832967612 | 0.994526835 |
| g Holdemanella    | g Verticillium                 | -0.067497286 | 0.38323712  | 0.905460587 |
| g Holdemanella    | g unclassified Tremellomycetes | -0.080746012 | 0.296664612 | 0.892181547 |
| g Holdemanella    | g Candida                      | -0.129269134 | 0.093922031 | 0.8415005   |
| g Holdemanella    | g Cladosporium                 | -0.09384329  | 0.224904859 | 0.874689648 |
| g Holdemanella    | g Debaromyces                  | -0.036014858 | 0.642025127 | 0.955341199 |
| g Holdemanella    | g Aspergillus                  | 0.050066619  | 0.517993753 | 0.939250598 |
| g Holdemanella    | g Kazachstania                 | 0.0467797    | 0.545874597 | 0.942564508 |
| g Holdemanella    | g Malassezia                   | -0.046007747 | 0.552527886 | 0.942564508 |
| g Holdemanella    | g unclassified Fungi           | 0.029917199  | 0.699405165 | 0.967505184 |
| g Holdemanella    | g Fusarium                     | 0.185557984  | 0.015719442 | 0.702895198 |
| g Holdemanella    | g Mycosphaerella               | 0.098231362  | 0.203869062 | 0.874689648 |
| g Holdemanella    | g Simplicillium                | -0.066172605 | 0.392663677 | 0.907694413 |
| g Holdemanella    | g unclassified Cordycipitaceae | -0.129779238 | 0.092621506 | 0.8415005   |
| g Holdemanella    | g unidentified                 | 0.088065283  | 0.254884412 | 0.874689648 |
| g Faecalococcus   | g Verticillium                 | 0.193223136  | 0.011835065 | 0.659702633 |
| g Faecalococcus   | g unclassified Tremellomycetes | 0.040118306  | 0.604544916 | 0.950399198 |
| g Faecalococcus   | g Candida                      | -0.118566754 | 0.12469809  | 0.849176369 |
| g Faecalococcus   | g Cladosporium                 | 0.028421155  | 0.713763001 | 0.970380158 |
| g Faecalococcus   | g Debaromyces                  | -0.080661948 | 0.297169432 | 0.892181547 |

|                          |                                |              |             |             |
|--------------------------|--------------------------------|--------------|-------------|-------------|
| g Faecalibacillus        | g Aspergillus                  | 0.012531389  | 0.871537902 | 0.994526835 |
| g Faecalibacillus        | g Kazachstania                 | 0.009334549  | 0.904125785 | 0.99540149  |
| g Faecalibacillus        | g Malassezia                   | 0.012501457  | 0.871842103 | 0.994526835 |
| g Faecalibacillus        | g unclassified_Fungi           | -0.101684965 | 0.188339829 | 0.873641816 |
| g Faecalibacillus        | g Fusarium                     | 0.081019742  | 0.295024766 | 0.892181547 |
| g Faecalibacillus        | g Mycosphaerella               | 0.084236922  | 0.276202757 | 0.888419029 |
| g Faecalibacillus        | g Simplicillium                | 0.083736881  | 0.279073706 | 0.889320764 |
| g Faecalibacillus        | g unclassified_Cordycipitaceae | 0.169397137  | 0.02768254  | 0.773194645 |
| g Faecalibacillus        | g unidentified                 | -0.023380732 | 0.762854129 | 0.982076388 |
| g Solobacterium          | g Verticillium                 | -0.095716279 | 0.215745355 | 0.874689648 |
| g Solobacterium          | g unclassified_Tremellomycetes | 0.036504631  | 0.637501313 | 0.954338328 |
| g Solobacterium          | g Candida                      | 0.040205155  | 0.60376225  | 0.950399198 |
| g Solobacterium          | g Cladosporium                 | 0.091871757  | 0.234840104 | 0.874689648 |
| g Solobacterium          | g Debaryomyces                 | -0.054788883 | 0.479255219 | 0.931845869 |
| g Solobacterium          | g Aspergillus                  | 0.221023275  | 0.003879718 | 0.596571242 |
| g Solobacterium          | g Kazachstania                 | 0.079185727  | 0.306127093 | 0.897967316 |
| g Solobacterium          | g Malassezia                   | 0.005238661  | 0.946105954 | 0.996925697 |
| g Solobacterium          | g unclassified_Fungi           | -0.024113084 | 0.755657055 | 0.981293944 |
| g Solobacterium          | g Fusarium                     | -0.061718147 | 0.425368863 | 0.918239588 |
| g Solobacterium          | g Mycosphaerella               | 0.068978623  | 0.372860047 | 0.901117392 |
| g Solobacterium          | g Simplicillium                | 0.009607683  | 0.901334469 | 0.995280411 |
| g Solobacterium          | g unclassified_Cordycipitaceae | -0.077819141 | 0.314575974 | 0.898525398 |
| g Solobacterium          | g unidentified                 | 0.030397227  | 0.694820432 | 0.966217026 |
| g CAG-536                | g Verticillium                 | -0.01568008  | 0.839650446 | 0.994526835 |
| g CAG-536                | g unclassified_Tremellomycetes | 0.097311479  | 0.208156855 | 0.874689648 |
| g CAG-536                | g Candida                      | -0.170428356 | 0.026735469 | 0.765986149 |
| g CAG-536                | g Cladosporium                 | 0.004293174  | 0.955821951 | 0.99717368  |
| g CAG-536                | g Debaryomyces                 | -0.094683588 | 0.220762048 | 0.874689648 |
| g CAG-536                | g Aspergillus                  | 0.041447163  | 0.592619306 | 0.947273049 |
| g CAG-536                | g Kazachstania                 | 0.047946887  | 0.535890232 | 0.941323418 |
| g CAG-536                | g Malassezia                   | 0.043553805  | 0.573936036 | 0.943352947 |
| g CAG-536                | g unclassified_Fungi           | 0.01499409   | 0.846577291 | 0.994526835 |
| g CAG-536                | g Fusarium                     | -0.059021729 | 0.445909183 | 0.921010267 |
| g CAG-536                | g Mycosphaerella               | -0.069492617 | 0.369300106 | 0.901117392 |
| g CAG-536                | g Simplicillium                | 0.011114827  | 0.885954701 | 0.994526835 |
| g CAG-536                | g unclassified_Cordycipitaceae | -0.024027364 | 0.756498385 | 0.981293944 |
| g CAG-536                | g unidentified                 | 0.081222072  | 0.293816527 | 0.892181547 |
| g Merdibacter            | g Verticillium                 | 0.067957189  | 0.379996794 | 0.90490297  |
| g Merdibacter            | g unclassified_Tremellomycetes | 0.054172391  | 0.484221949 | 0.932872225 |
| g Merdibacter            | g Candida                      | 0.060231781  | 0.436622988 | 0.919176572 |
| g Merdibacter            | g Cladosporium                 | 0.030884571  | 0.690177115 | 0.96434561  |
| g Merdibacter            | g Debaryomyces                 | -0.043373261 | 0.575526343 | 0.943352947 |
| g Merdibacter            | g Aspergillus                  | 0.054414245  | 0.482270176 | 0.932872225 |
| g Merdibacter            | g Kazachstania                 | 0.016131692  | 0.835096922 | 0.994526835 |
| g Merdibacter            | g Malassezia                   | -0.013044228 | 0.866328724 | 0.994526835 |
| g Merdibacter            | g unclassified_Fungi           | -0.001106929 | 0.988603978 | 0.99049974  |
| g Merdibacter            | g Fusarium                     | -0.013595646 | 0.860734099 | 0.994526835 |
| g Merdibacter            | g Mycosphaerella               | -0.052106959 | 0.501061611 | 0.936281889 |
| g Merdibacter            | g Simplicillium                | 0.114484115  | 0.138306967 | 0.849249996 |
| g Merdibacter            | g unclassified_Cordycipitaceae | 0.068212026  | 0.378208508 | 0.904750985 |
| g Merdibacter            | g unidentified                 | 0.029842882  | 0.700115942 | 0.967505184 |
| g Erysipelatoclostridium | g Verticillium                 | 0.010955397  | 0.887579712 | 0.994526835 |
| g Erysipelatoclostridium | g unclassified_Tremellomycetes | 0.205094803  | 0.007474235 | 0.613926619 |
| g Erysipelatoclostridium | g Candida                      | -0.04892068  | 0.527630513 | 0.940363396 |
| g Erysipelatoclostridium | g Cladosporium                 | 0.100041795  | 0.195617002 | 0.874689648 |
| g Erysipelatoclostridium | g Debaryomyces                 | -3.40E-05    | 0.999650213 | 0.999758576 |
| g Erysipelatoclostridium | g Aspergillus                  | -0.074515129 | 0.335624497 | 0.900151743 |
| g Erysipelatoclostridium | g Kazachstania                 | -0.014074499 | 0.855881314 | 0.994526835 |
| g Erysipelatoclostridium | g Malassezia                   | -0.054152709 | 0.484380963 | 0.932872225 |
| g Erysipelatoclostridium | g unclassified_Fungi           | -0.188072222 | 0.014337879 | 0.702895198 |
| g Erysipelatoclostridium | g Fusarium                     | -0.134293718 | 0.081726453 | 0.8415005   |
| g Erysipelatoclostridium | g Mycosphaerella               | -0.091791643 | 0.23525024  | 0.874689648 |
| g Erysipelatoclostridium | g Simplicillium                | -0.002910986 | 0.970036878 | 0.998625698 |
| g Erysipelatoclostridium | g unclassified_Cordycipitaceae | 0.007341195  | 0.924530473 | 0.996251765 |
| g Erysipelatoclostridium | g unidentified                 | -0.159714607 | 0.038059417 | 0.808354944 |
| g Massiliomicrobiota     | g Verticillium                 | 0.0736081    | 0.341556483 | 0.900151743 |
| g Massiliomicrobiota     | g unclassified_Tremellomycetes | 0.170246974  | 0.026900012 | 0.765986149 |
| g Massiliomicrobiota     | g Candida                      | -0.009555319 | 0.901869511 | 0.995280411 |
| g Massiliomicrobiota     | g Cladosporium                 | 0.068042479  | 0.379397715 | 0.90490297  |
| g Massiliomicrobiota     | g Debaryomyces                 | -0.098352265 | 0.203310276 | 0.874689648 |
| g Massiliomicrobiota     | g Aspergillus                  | 0.001112959  | 0.988541899 | 0.999049974 |
| g Massiliomicrobiota     | g Kazachstania                 | -0.074487213 | 0.335806079 | 0.900151743 |
| g Massiliomicrobiota     | g Malassezia                   | -0.026883516 | 0.728625394 | 0.973108701 |
| g Massiliomicrobiota     | g unclassified_Fungi           | -0.19741339  | 0.010090964 | 0.613926619 |
| g Massiliomicrobiota     | g Fusarium                     | -0.126567083 | 0.101054728 | 0.8415005   |
| g Massiliomicrobiota     | g Mycosphaerella               | 0.014972231  | 0.846798209 | 0.994526835 |
| g Massiliomicrobiota     | g Simplicillium                | -0.00059655  | 0.993858273 | 0.999049974 |
| g Massiliomicrobiota     | g unclassified_Cordycipitaceae | 0.141969923  | 0.065585088 | 0.836350979 |

|                      |                                |              |             |             |
|----------------------|--------------------------------|--------------|-------------|-------------|
| g Massiliomicrobiota | g unidentified                 | -0.144542025 | 0.060798384 | 0.832568254 |
| g KLE1796            | g Verticillium                 | 0.002641333  | 0.972811328 | 0.998625698 |
| g KLE1796            | g unclassified Tremellomycetes | 0.202229539  | 0.008369866 | 0.613926619 |
| g KLE1796            | g Candida                      | -0.070943949 | 0.359361706 | 0.900151743 |
| g KLE1796            | g Cladosporium                 | 0.017672839  | 0.819599911 | 0.992339735 |
| g KLE1796            | g Debaromyces                  | -0.042048085 | 0.587261766 | 0.947150582 |
| g KLE1796            | g Aspergillus                  | 0.024464276  | 0.752213168 | 0.980278684 |
| g KLE1796            | g Kazachstania                 | 0.051911916  | 0.502667546 | 0.936281889 |
| g KLE1796            | g Malassezia                   | 0.077158365  | 0.318715177 | 0.898536448 |
| g KLE1796            | g unclassified Fungi           | -0.089124468 | 0.249192144 | 0.874689648 |
| g KLE1796            | g Fusarium                     | -0.02636029  | 0.733706226 | 0.973693103 |
| g KLE1796            | g Mycosphaerella               | -0.191569545 | 0.012593086 | 0.663907472 |
| g KLE1796            | g Simplicillium                | 0.004431989  | 0.954395021 | 0.99717368  |
| g KLE1796            | g unclassified Cordycipitaceae | 0.033718194  | 0.663412117 | 0.959259869 |
| g KLE1796            | g unidentified                 | -0.033491687 | 0.665536563 | 0.959776195 |
| g Catenibacterium    | g Verticillium                 | -0.024397676 | 0.75286589  | 0.980305754 |
| g Catenibacterium    | g unclassified Tremellomycetes | 0.098543485  | 0.202428761 | 0.874689648 |
| g Catenibacterium    | g Candida                      | -0.096444077 | 0.21225902  | 0.874689648 |
| g Catenibacterium    | g Cladosporium                 | 0.098281768  | 0.203635967 | 0.874689648 |
| g Catenibacterium    | g Debaromyces                  | -0.206045831 | 0.00719638  | 0.613926619 |
| g Catenibacterium    | g Aspergillus                  | 0.055434109  | 0.474086647 | 0.929115207 |
| g Catenibacterium    | g Kazachstania                 | 0.058976494  | 0.44625847  | 0.921010267 |
| g Catenibacterium    | g Malassezia                   | -0.011548384 | 0.881538052 | 0.994526835 |
| g Catenibacterium    | g unclassified Fungi           | 0.242310022  | 0.00150307  | 0.534709451 |
| g Catenibacterium    | g Fusarium                     | 0.090150602  | 0.243762064 | 0.874689648 |
| g Catenibacterium    | g Mycosphaerella               | 0.069924132  | 0.366327647 | 0.901117392 |
| g Catenibacterium    | g Simplicillium                | 0.079169019  | 0.306229482 | 0.897967316 |
| g Catenibacterium    | g unclassified Cordycipitaceae | -0.014070343 | 0.85592341  | 0.994526835 |
| g Catenibacterium    | g unidentified                 | 0.101314432  | 0.189963284 | 0.87460258  |
| g Beduini            | g Verticillium                 | 0.010254942  | 0.894724622 | 0.995135868 |
| g Beduini            | g unclassified Tremellomycetes | 0.079817927  | 0.302269434 | 0.896412022 |
| g Beduini            | g Candida                      | -0.030962149 | 0.689439026 | 0.96434561  |
| g Beduini            | g Cladosporium                 | 0.134376765  | 0.08153613  | 0.8415005   |
| g Beduini            | g Debaromyces                  | -0.069192883 | 0.371373528 | 0.901117392 |
| g Beduini            | g Aspergillus                  | 0.108112936  | 0.161770519 | 0.859887758 |
| g Beduini            | g Kazachstania                 | -0.00775973  | 0.920241659 | 0.996251765 |
| g Beduini            | g Malassezia                   | 0.001096332  | 0.988713068 | 0.999049974 |
| g Beduini            | g unclassified Fungi           | -0.033815515 | 0.662500147 | 0.959259869 |
| g Beduini            | g Fusarium                     | -0.010662985 | 0.890561362 | 0.994653074 |
| g Beduini            | g Mycosphaerella               | -0.011019236 | 0.886928971 | 0.994526835 |
| g Beduini            | g Simplicillium                | 0.012293525  | 0.873955898 | 0.994526835 |
| g Beduini            | g unclassified Cordycipitaceae | 0.071030861  | 0.358771884 | 0.900151743 |
| g Beduini            | g unidentified                 | -0.000299503 | 0.996916466 | 0.999314917 |
| g Coprobacillus      | g Verticillium                 | 0.125522048  | 0.103925415 | 0.841929371 |
| g Coprobacillus      | g unclassified Tremellomycetes | -0.0128844   | 0.867951577 | 0.994526835 |
| g Coprobacillus      | g Candida                      | 0.003619066  | 0.962753256 | 0.998526304 |
| g Coprobacillus      | g Cladosporium                 | -0.022409973 | 0.772425421 | 0.984510076 |
| g Coprobacillus      | g Debaromyces                  | -0.038545359 | 0.618797253 | 0.952309753 |
| g Coprobacillus      | g Aspergillus                  | 0.033249531  | 0.66781072  | 0.960290166 |
| g Coprobacillus      | g Kazachstania                 | -0.056979209 | 0.461833976 | 0.927602832 |
| g Coprobacillus      | g Malassezia                   | 0.071373753  | 0.356450767 | 0.900151743 |
| g Coprobacillus      | g unclassified Fungi           | -0.033636819 | 0.664175039 | 0.959259869 |
| g Coprobacillus      | g Fusarium                     | -0.046124542 | 0.551518728 | 0.942564508 |
| g Coprobacillus      | g Mycosphaerella               | 0.045839105  | 0.553986608 | 0.942564508 |
| g Coprobacillus      | g Simplicillium                | 0.129104777  | 0.094344142 | 0.8415005   |
| g Coprobacillus      | g unclassified Cordycipitaceae | 0.044454153  | 0.566036316 | 0.942564508 |
| g Coprobacillus      | g unidentified                 | 0.003106966  | 0.968020672 | 0.998625698 |
| g Stoquefichus       | g Verticillium                 | -0.130853369 | 0.089929844 | 0.8415005   |
| g Stoquefichus       | g unclassified Tremellomycetes | 0.140946472  | 0.067573439 | 0.836350979 |
| g Stoquefichus       | g Candida                      | 0.066398275  | 0.391048019 | 0.907694413 |
| g Stoquefichus       | g Cladosporium                 | 0.07946304   | 0.304430976 | 0.897967316 |
| g Stoquefichus       | g Debaromyces                  | 0.023217669  | 0.764459404 | 0.982298393 |
| g Stoquefichus       | g Aspergillus                  | -0.002679156 | 0.97242215  | 0.998625698 |
| g Stoquefichus       | g Kazachstania                 | 0.074011853  | 0.338907768 | 0.900151743 |
| g Stoquefichus       | g Malassezia                   | -0.037563583 | 0.627766059 | 0.953023967 |
| g Stoquefichus       | g unclassified Fungi           | -0.182534007 | 0.017533643 | 0.702895198 |
| g Stoquefichus       | g Fusarium                     | -0.067066512 | 0.386287367 | 0.906174944 |
| g Stoquefichus       | g Mycosphaerella               | 0.048885769  | 0.527925514 | 0.940363396 |
| g Stoquefichus       | g Simplicillium                | -0.025614271 | 0.740970488 | 0.977217936 |
| g Stoquefichus       | g unclassified Cordycipitaceae | -0.009084393 | 0.906683308 | 0.996161923 |
| g Stoquefichus       | g unidentified                 | -0.109706841 | 0.155638647 | 0.851524192 |
| g Bacillus_A         | g Verticillium                 | 0.017686196  | 0.819465897 | 0.992339735 |
| g Bacillus_A         | g unclassified Tremellomycetes | -0.221072402 | 0.003871607 | 0.596571242 |
| g Bacillus_A         | g Candida                      | 0.006664117  | 0.931473171 | 0.996251765 |
| g Bacillus_A         | g Cladosporium                 | 0.001006602  | 0.989636799 | 0.999049974 |
| g Bacillus_A         | g Debaromyces                  | 0.137904835  | 0.07377435  | 0.8415005   |
| g Bacillus_A         | g Aspergillus                  | 0.136250755  | 0.077335356 | 0.8415005   |
| g Bacillus_A         | g Kazachstania                 | 0.029575085  | 0.702679344 | 0.967508066 |



|                   |                                |              |             |             |
|-------------------|--------------------------------|--------------|-------------|-------------|
| g Bacillus A      | g Malassezia                   | 0.014091578  | 0.855708328 | 0.994526835 |
| g Bacillus A      | g unclassified Fungi           | 0.133738656  | 0.083007711 | 0.8415005   |
| g Bacillus A      | g Fusarium                     | -0.017694237 | 0.819385218 | 0.992339735 |
| g Bacillus A      | g Mycosphaerella               | 0.015318178  | 0.843303288 | 0.994526835 |
| g Bacillus A      | g Simplicillium                | 0.046697107  | 0.54658456  | 0.942564508 |
| g Bacillus A      | g unclassified Cordycipitaceae | -0.160641253 | 0.03694178  | 0.808354944 |
| g Bacillus A      | g unidentified                 | 0.171301347  | 0.025955523 | 0.765986149 |
| g FJAT-27916      | g Verticillium                 | -0.030625584 | 0.692643273 | 0.966086731 |
| g FJAT-27916      | g unclassified Tremellomycetes | -0.071897913 | 0.352920776 | 0.900151743 |
| g FJAT-27916      | g Candida                      | -0.043934593 | 0.57058866  | 0.942564508 |
| g FJAT-27916      | g Cladosporium                 | -0.116445831 | 0.131632701 | 0.849249996 |
| g FJAT-27916      | g Debaromyces                  | -0.030227082 | 0.696444226 | 0.967127531 |
| g FJAT-27916      | g Aspergillus                  | 0.069176446  | 0.371487436 | 0.901117392 |
| g FJAT-27916      | g Kazachstania                 | -0.032395528 | 0.675854973 | 0.962556032 |
| g FJAT-27916      | g Malassezia                   | -0.106697678 | 0.167365047 | 0.864987015 |
| g FJAT-27916      | g unclassified Fungi           | -0.08658218  | 0.263004492 | 0.878368327 |
| g FJAT-27916      | g Fusarium                     | -0.093496042 | 0.226632824 | 0.874689648 |
| g FJAT-27916      | g Mycosphaerella               | -0.048012261 | 0.535333713 | 0.941323418 |
| g FJAT-27916      | g Simplicillium                | -0.037586491 | 0.627556156 | 0.95290209  |
| g FJAT-27916      | g unclassified Cordycipitaceae | -0.035889745 | 0.64318286  | 0.955341199 |
| g FJAT-27916      | g unidentified                 | 0.024025718  | 0.756514543 | 0.981293944 |
| g MGYG-HGUT-04249 | g Verticillium                 | 0.048841759  | 0.528297519 | 0.940363396 |
| g MGYG-HGUT-04249 | g unclassified Tremellomycetes | 0.012467475  | 0.872187498 | 0.994526835 |
| g MGYG-HGUT-04249 | g Candida                      | -0.074794454 | 0.333811027 | 0.900151743 |
| g MGYG-HGUT-04249 | g Cladosporium                 | -0.089055245 | 0.249561449 | 0.874689648 |
| g MGYG-HGUT-04249 | g Debaromyces                  | -0.061848346 | 0.424391116 | 0.918239588 |
| g MGYG-HGUT-04249 | g Aspergillus                  | -0.010914137 | 0.888000334 | 0.994526835 |
| g MGYG-HGUT-04249 | g Kazachstania                 | -0.090409887 | 0.242403118 | 0.874689648 |
| g MGYG-HGUT-04249 | g Malassezia                   | -0.062598321 | 0.418784469 | 0.916661525 |
| g MGYG-HGUT-04249 | g unclassified Fungi           | -0.144438036 | 0.060986185 | 0.832568254 |
| g MGYG-HGUT-04249 | g Fusarium                     | -0.025351573 | 0.743533969 | 0.978404143 |
| g MGYG-HGUT-04249 | g Mycosphaerella               | -0.013537803 | 0.861320651 | 0.994526835 |
| g MGYG-HGUT-04249 | g Simplicillium                | 0.070422832  | 0.362910876 | 0.901117392 |
| g MGYG-HGUT-04249 | g unclassified Cordycipitaceae | 0.024142093  | 0.755372406 | 0.981282148 |
| g MGYG-HGUT-04249 | g unidentified                 | -0.062282887 | 0.421137299 | 0.91680338  |
| g UBA5026         | g Verticillium                 | -0.09459816  | 0.221180731 | 0.874689648 |
| g UBA5026         | g unclassified Tremellomycetes | 0.099403275  | 0.198499258 | 0.874689648 |
| g UBA5026         | g Candida                      | -0.011952242 | 0.877427229 | 0.994526835 |
| g UBA5026         | g Cladosporium                 | 0.08138029   | 0.29287401  | 0.892181547 |
| g UBA5026         | g Debaromyces                  | -0.045439811 | 0.557447844 | 0.942564508 |
| g UBA5026         | g Aspergillus                  | 0.023314096  | 0.763510008 | 0.982076388 |
| g UBA5026         | g Kazachstania                 | 0.096148699  | 0.21366906  | 0.874689648 |
| g UBA5026         | g Malassezia                   | -0.042651556 | 0.581903967 | 0.944873255 |
| g UBA5026         | g unclassified Fungi           | -0.017975298 | 0.816566511 | 0.991841934 |
| g UBA5026         | g Fusarium                     | 0.049873501  | 0.51961143  | 0.939250598 |
| g UBA5026         | g Mycosphaerella               | -0.021836705 | 0.778093876 | 0.984731701 |
| g UBA5026         | g Simplicillium                | 0.001365955  | 0.985937512 | 0.999049974 |
| g UBA5026         | g unclassified Cordycipitaceae | -0.093434233 | 0.226941373 | 0.874689648 |
| g UBA5026         | g unidentified                 | -0.017859477 | 0.817727774 | 0.991841934 |
| g CAG-594         | g Verticillium                 | 0.00305263   | 0.968579648 | 0.998625698 |
| g CAG-594         | g unclassified Tremellomycetes | -0.106998938 | 0.166162258 | 0.864643535 |
| g CAG-594         | g Candida                      | -0.139361769 | 0.070748909 | 0.8415005   |
| g CAG-594         | g Cladosporium                 | -0.058530746 | 0.449708644 | 0.922032734 |
| g CAG-594         | g Debaromyces                  | -0.011327661 | 0.883786115 | 0.994526835 |
| g CAG-594         | g Aspergillus                  | 0.067139159  | 0.385771936 | 0.906174944 |
| g CAG-594         | g Kazachstania                 | -0.012010382 | 0.876835694 | 0.994526835 |
| g CAG-594         | g Malassezia                   | 0.060570241  | 0.434045474 | 0.918253507 |
| g CAG-594         | g unclassified Fungi           | -0.080359922 | 0.298987837 | 0.92417272  |
| g CAG-594         | g Fusarium                     | 0.046508735  | 0.548205493 | 0.942564508 |
| g CAG-594         | g Mycosphaerella               | 0.050622046  | 0.513355565 | 0.938277062 |
| g CAG-594         | g Simplicillium                | 0.060272214  | 0.436314618 | 0.919176572 |
| g CAG-594         | g unclassified Cordycipitaceae | -0.082234607 | 0.287819545 | 0.891214772 |
| g CAG-594         | g unidentified                 | 0.1071343    | 0.165623923 | 0.864354699 |
| g RUG832          | g Verticillium                 | -0.114409872 | 0.138564542 | 0.849249996 |
| g RUG832          | g unclassified Tremellomycetes | 0.070779463  | 0.360479627 | 0.900151743 |
| g RUG832          | g Candida                      | -0.020729837 | 0.789071465 | 0.986710331 |
| g RUG832          | g Cladosporium                 | 0.097153179  | 0.208901214 | 0.874689648 |
| g RUG832          | g Debaromyces                  | -0.013853548 | 0.858119819 | 0.994526835 |
| g RUG832          | g Aspergillus                  | 0.06756754   | 0.382741048 | 0.905460587 |
| g RUG832          | g Kazachstania                 | 0.056472098  | 0.46583595  | 0.927602832 |
| g RUG832          | g Malassezia                   | -0.014947993 | 0.84704319  | 0.994526835 |
| g RUG832          | g unclassified Fungi           | 0.008395178  | 0.913734537 | 0.996251765 |
| g RUG832          | g Fusarium                     | -0.075810435 | 0.327267875 | 0.899370541 |
| g RUG832          | g Mycosphaerella               | 0.014140235  | 0.855215557 | 0.994526835 |
| g RUG832          | g Simplicillium                | 0.023700265  | 0.759711434 | 0.982076388 |
| g RUG832          | g unclassified Cordycipitaceae | -0.072472832 | 0.349074241 | 0.900151743 |
| g RUG832          | g unidentified                 | -0.053943022 | 0.486076878 | 0.932872225 |
| g CAG-822         | g Verticillium                 | -0.001475004 | 0.984814982 | 0.999049974 |

|           |                                |              |             |             |
|-----------|--------------------------------|--------------|-------------|-------------|
| g CAG-822 | g unclassified Tremellomycetes | 0.045051032  | 0.560827929 | 0.942564508 |
| g CAG-822 | g Candida                      | 0.065982267  | 0.394029495 | 0.907694413 |
| g CAG-822 | g Cladosporium                 | 0.064067602  | 0.407926506 | 0.913116876 |
| g CAG-822 | g Debaromyces                  | -0.08467535  | 0.273702032 | 0.886311878 |
| g CAG-822 | g Aspergillus                  | 0.128160777  | 0.096797833 | 0.8415005   |
| g CAG-822 | g Kazachstania                 | 0.07832863   | 0.311408477 | 0.897967316 |
| g CAG-822 | g Malassezia                   | -0.012001632 | 0.876924718 | 0.994526835 |
| g CAG-822 | g unclassified Fungi           | -0.078736642 | 0.308886949 | 0.897967316 |
| g CAG-822 | g Fusarium                     | -0.019583937 | 0.800480026 | 0.987523813 |
| g CAG-822 | g Mycosphaerella               | -0.030592813 | 0.692955554 | 0.966086731 |
| g CAG-822 | g Simplicillium                | 0.156803887  | 0.041757035 | 0.808354944 |
| g CAG-822 | g unclassified Cordycipitaceae | -0.046288053 | 0.550107438 | 0.942564508 |
| g CAG-822 | g unidentified                 | -0.100451339 | 0.193784412 | 0.874689648 |
| g CAG-884 | g Verticillium                 | 0.031015636  | 0.688930318 | 0.96434561  |
| g CAG-884 | g unclassified Tremellomycetes | 0.184032896  | 0.01661285  | 0.702895198 |
| g CAG-884 | g Candida                      | -0.031204397 | 0.687136131 | 0.963892039 |
| g CAG-884 | g Cladosporium                 | -0.002394659 | 0.975349636 | 0.998625698 |
| g CAG-884 | g Debaromyces                  | -0.03710952  | 0.631932666 | 0.954051837 |
| g CAG-884 | g Aspergillus                  | 0.045611825  | 0.555955479 | 0.942564508 |
| g CAG-884 | g Kazachstania                 | -0.035952241 | 0.642604445 | 0.955341199 |
| g CAG-884 | g Malassezia                   | -0.045305705 | 0.558612663 | 0.942564508 |
| g CAG-884 | g unclassified Fungi           | -0.083138371 | 0.282536366 | 0.8902203   |
| g CAG-884 | g Fusarium                     | -0.005214721 | 0.946351873 | 0.996925697 |
| g CAG-884 | g Mycosphaerella               | -0.036366522 | 0.638775623 | 0.955161085 |
| g CAG-884 | g Simplicillium                | -0.027526086 | 0.722401811 | 0.971987582 |
| g CAG-884 | g unclassified Cordycipitaceae | 0.04893751   | 0.527488332 | 0.940363396 |
| g CAG-884 | g unidentified                 | -0.09373405  | 0.225447446 | 0.874689648 |
| g CAG-710 | g Verticillium                 | 0.011031877  | 0.886800126 | 0.994526835 |
| g CAG-710 | g unclassified Tremellomycetes | 0.042710317  | 0.581383485 | 0.944873255 |
| g CAG-710 | g Candida                      | -0.065434925 | 0.397972927 | 0.909588897 |
| g CAG-710 | g Cladosporium                 | 0.087970588  | 0.255397649 | 0.875348885 |
| g CAG-710 | g Debaromyces                  | -0.00644075  | 0.933764723 | 0.996251765 |
| g CAG-710 | g Aspergillus                  | 0.073210211  | 0.344179534 | 0.900151743 |
| g CAG-710 | g Kazachstania                 | 0.064282084  | 0.40635551  | 0.913116876 |
| g CAG-710 | g Malassezia                   | 0.070268756  | 0.363964385 | 0.901117392 |
| g CAG-710 | g unclassified Fungi           | -0.07688853  | 0.320415578 | 0.898741278 |
| g CAG-710 | g Fusarium                     | -0.002578433 | 0.973458549 | 0.998625698 |
| g CAG-710 | g Mycosphaerella               | 0.003304752  | 0.965986087 | 0.998625698 |
| g CAG-710 | g Simplicillium                | 0.104610235  | 0.17587782  | 0.871837921 |
| g CAG-710 | g unclassified Cordycipitaceae | -0.039745848 | 0.607906523 | 0.951102497 |
| g CAG-710 | g unidentified                 | -0.03123417  | 0.686853298 | 0.963892039 |
| g CAG-611 | g Verticillium                 | -0.013232179 | 0.864421035 | 0.994526835 |
| g CAG-611 | g unclassified Tremellomycetes | -0.180888167 | 0.018595478 | 0.702895198 |
| g CAG-611 | g Candida                      | 0.021837256  | 0.778088417 | 0.984731701 |
| g CAG-611 | g Cladosporium                 | -0.075495137 | 0.329289581 | 0.899622647 |
| g CAG-611 | g Debaromyces                  | 0.063911868  | 0.409069442 | 0.913116876 |
| g CAG-611 | g Aspergillus                  | 0.155288991  | 0.043797803 | 0.816320268 |
| g CAG-611 | g Kazachstania                 | -0.0111737   | 0.885354758 | 0.994526835 |
| g CAG-611 | g Malassezia                   | -0.042082773 | 0.586953178 | 0.947150582 |
| g CAG-611 | g unclassified Fungi           | 0.10723508   | 0.165223969 | 0.864354699 |
| g CAG-611 | g Fusarium                     | -0.009547893 | 0.901945388 | 0.995280411 |
| g CAG-611 | g Mycosphaerella               | -0.081141898 | 0.294294904 | 0.892181547 |
| g CAG-611 | g Simplicillium                | 0.055659529  | 0.472288106 | 0.928769554 |
| g CAG-611 | g unclassified Cordycipitaceae | -0.122815927 | 0.111657796 | 0.843328451 |
| g CAG-611 | g unidentified                 | 0.151243814  | 0.049659691 | 0.832568254 |
| g UBA7057 | g Verticillium                 | 0.021481024  | 0.781616748 | 0.986171666 |
| g UBA7057 | g unclassified Tremellomycetes | 0.023287218  | 0.763774604 | 0.982102369 |
| g UBA7057 | g Candida                      | -0.06417652  | 0.407128276 | 0.913116876 |
| g UBA7057 | g Cladosporium                 | 0.016408151  | 0.832312128 | 0.994526835 |
| g UBA7057 | g Debaromyces                  | -0.039648547 | 0.608786071 | 0.951102497 |
| g UBA7057 | g Aspergillus                  | 0.021193667  | 0.784466144 | 0.986574859 |
| g UBA7057 | g Kazachstania                 | -0.060938924 | 0.431247744 | 0.918239588 |
| g UBA7057 | g Malassezia                   | -0.019293357 | 0.803379859 | 0.988396129 |
| g UBA7057 | g unclassified Fungi           | -0.240941362 | 0.001601614 | 0.547277286 |
| g UBA7057 | g Fusarium                     | -0.046174946 | 0.551083499 | 0.942564508 |
| g UBA7057 | g Mycosphaerella               | 0.00114552   | 0.988206709 | 0.999049974 |
| g UBA7057 | g Simplicillium                | 0.030155556  | 0.697127261 | 0.967127531 |
| g UBA7057 | g unclassified Cordycipitaceae | 0.094560433  | 0.221365807 | 0.874689648 |
| g UBA7057 | g unidentified                 | -0.023606563 | 0.760632618 | 0.982076388 |
| g CAG-417 | g Verticillium                 | -0.04636851  | 0.549413645 | 0.942564508 |
| g CAG-417 | g unclassified Tremellomycetes | -0.11990752  | 0.120462151 | 0.849176369 |
| g CAG-417 | g Candida                      | 0.001434811  | 0.985228714 | 0.999049974 |
| g CAG-417 | g Cladosporium                 | 0.003300999  | 0.96602469  | 0.998625698 |
| g CAG-417 | g Debaromyces                  | 0.010914299  | 0.887998685 | 0.994526835 |
| g CAG-417 | g Aspergillus                  | 0.096889518  | 0.210145241 | 0.874689648 |
| g CAG-417 | g Kazachstania                 | 0.038102469  | 0.622836318 | 0.952309753 |
| g CAG-417 | g Malassezia                   | -0.033123619 | 0.668994402 | 0.960428856 |
| g CAG-417 | g unclassified Fungi           | -0.237599156 | 0.001867503 | 0.550026842 |

|            |                                |              |             |             |
|------------|--------------------------------|--------------|-------------|-------------|
| g CAG-417  | g Fusarium                     | -0.046226371 | 0.550639623 | 0.942564508 |
| g CAG-417  | g Mycosphaerella               | -0.087333992 | 0.258866422 | 0.878368327 |
| g CAG-417  | g Simplicillium                | 0.141190237  | 0.067095451 | 0.836350979 |
| g CAG-417  | g unclassified Cordycipitaceae | -0.079284225 | 0.305523946 | 0.897967316 |
| g CAG-417  | g unidentified                 | 0.004247136  | 0.956295218 | 0.99717368  |
| g CAG-877  | g Verticillium                 | 0.010517906  | 0.892041267 | 0.994653074 |
| g CAG-877  | g unclassified Tremellomycetes | 0.011505823  | 0.881971467 | 0.994526835 |
| g CAG-877  | g Candida                      | -0.013401348 | 0.862704653 | 0.994526835 |
| g CAG-877  | g Cladosporium                 | 0.065542445  | 0.397196425 | 0.909588897 |
| g CAG-877  | g Debaromyces                  | -0.046891349 | 0.544915584 | 0.942564508 |
| g CAG-877  | g Aspergillus                  | 0.071704865  | 0.354218311 | 0.900151743 |
| g CAG-877  | g Kazachstania                 | -0.03666239  | 0.636047006 | 0.954338328 |
| g CAG-877  | g Malassezia                   | 0.04149118   | 0.592226119 | 0.947273049 |
| g CAG-877  | g unclassified Fungi           | 0.016701297  | 0.82936153  | 0.993725906 |
| g CAG-877  | g Fusarium                     | 0.05212257   | 0.500933185 | 0.936281889 |
| g CAG-877  | g Mycosphaerella               | -0.042733498 | 0.581178213 | 0.944873255 |
| g CAG-877  | g Simplicillium                | -0.025248429 | 0.744541252 | 0.978592408 |
| g CAG-877  | g unclassified Cordycipitaceae | 0.025520577  | 0.741884454 | 0.977585637 |
| g CAG-877  | g unidentified                 | -0.063524884 | 0.411917682 | 0.913695764 |
| g CAG-451  | g Verticillium                 | -0.10069904  | 0.192682103 | 0.874689648 |
| g CAG-451  | g unclassified Tremellomycetes | 0.016659054  | 0.829786572 | 0.993834041 |
| g CAG-451  | g Candida                      | 0.069722783  | 0.367712783 | 0.901117392 |
| g CAG-451  | g Cladosporium                 | 0.037289829  | 0.6302767   | 0.953903732 |
| g CAG-451  | g Debaromyces                  | -0.024741348 | 0.749499559 | 0.980027605 |
| g CAG-451  | g Aspergillus                  | 0.098598848  | 0.202174057 | 0.874689648 |
| g CAG-451  | g Kazachstania                 | 0.051382522  | 0.507040017 | 0.936546622 |
| g CAG-451  | g Malassezia                   | -0.007425427 | 0.923667146 | 0.996251765 |
| g CAG-451  | g unclassified Fungi           | -0.069405273 | 0.369903575 | 0.901117392 |
| g CAG-451  | g Fusarium                     | -0.004303904 | 0.955711648 | 0.99717368  |
| g CAG-451  | g Mycosphaerella               | 0.015424811  | 0.84222664  | 0.994526835 |
| g CAG-451  | g Simplicillium                | 0.072846645  | 0.34658743  | 0.900151743 |
| g CAG-451  | g unclassified Cordycipitaceae | -0.020803116 | 0.788343393 | 0.986710331 |
| g CAG-451  | g unidentified                 | 0.007269388  | 0.925266513 | 0.996251765 |
| g CAG-628  | g Verticillium                 | 0.05578821   | 0.471263081 | 0.928769554 |
| g CAG-628  | g unclassified Tremellomycetes | -0.034669079 | 0.654523019 | 0.956614192 |
| g CAG-628  | g Candida                      | 0.004713519  | 0.951501513 | 0.99717368  |
| g CAG-628  | g Cladosporium                 | 0.027999775  | 0.717825526 | 0.97067915  |
| g CAG-628  | g Debaromyces                  | 0.055233791  | 0.475688029 | 0.930400202 |
| g CAG-628  | g Aspergillus                  | 0.006899858  | 0.929055295 | 0.996251765 |
| g CAG-628  | g Kazachstania                 | -0.0336138   | 0.664390913 | 0.959259869 |
| g CAG-628  | g Malassezia                   | -0.107929982 | 0.162485761 | 0.859887758 |
| g CAG-628  | g unclassified Fungi           | -0.205227464 | 0.007434913 | 0.613926619 |
| g CAG-628  | g Fusarium                     | -0.047743718 | 0.537621604 | 0.941323418 |
| g CAG-628  | g Mycosphaerella               | -0.055835206 | 0.470889034 | 0.928769554 |
| g CAG-628  | g Simplicillium                | 0.114176802  | 0.139375532 | 0.849249996 |
| g CAG-628  | g unclassified Cordycipitaceae | 0.023940443  | 0.75735179  | 0.981293944 |
| g CAG-628  | g unidentified                 | 0.00724775   | 0.925488321 | 0.996251765 |
| g CAG-460  | g Verticillium                 | -0.165952813 | 0.031056336 | 0.793886316 |
| g CAG-460  | g unclassified Tremellomycetes | 0.11550429   | 0.134804521 | 0.849249996 |
| g CAG-460  | g Candida                      | -0.011009729 | 0.887025878 | 0.994526835 |
| g CAG-460  | g Cladosporium                 | 0.00206797   | 0.978711682 | 0.998625698 |
| g CAG-460  | g Debaromyces                  | -0.029751607 | 0.700989264 | 0.967505184 |
| g CAG-460  | g Aspergillus                  | 0.140790274  | 0.067881177 | 0.836350979 |
| g CAG-460  | g Kazachstania                 | 0.016190378  | 0.8345056   | 0.994526835 |
| g CAG-460  | g Malassezia                   | -0.027194776 | 0.725608456 | 0.972631421 |
| g CAG-460  | g unclassified Fungi           | -0.062893875 | 0.416586887 | 0.916564692 |
| g CAG-460  | g Fusarium                     | 0.062758537  | 0.417592352 | 0.916661525 |
| g CAG-460  | g Mycosphaerella               | -0.046335071 | 0.549701944 | 0.942564508 |
| g CAG-460  | g Simplicillium                | 0.002107773  | 0.978302037 | 0.998625698 |
| g CAG-460  | g unclassified Cordycipitaceae | -0.021988545 | 0.776591332 | 0.984510076 |
| g CAG-460  | g unidentified                 | 0.02453005   | 0.751568709 | 0.980278684 |
| g CAG-582  | g Verticillium                 | 0.011118401  | 0.885918285 | 0.994526835 |
| g CAG-582  | g unclassified Tremellomycetes | 0.046071851  | 0.551973887 | 0.942564508 |
| g CAG-582  | g Candida                      | -0.077018104 | 0.319598321 | 0.898536448 |
| g CAG-582  | g Cladosporium                 | -0.037286095 | 0.63031098  | 0.953903732 |
| g CAG-582  | g Debaromyces                  | -0.135554045 | 0.078876234 | 0.8415005   |
| g CAG-582  | g Aspergillus                  | 0.058644189  | 0.448829157 | 0.922032734 |
| g CAG-582  | g Kazachstania                 | 0.003868884  | 0.960184228 | 0.997919102 |
| g CAG-582  | g Malassezia                   | -0.079300503 | 0.305424341 | 0.897967316 |
| g CAG-582  | g unclassified Fungi           | -0.128652045 | 0.095514668 | 0.8415005   |
| g CAG-582  | g Fusarium                     | 0.006174345  | 0.936498508 | 0.996251765 |
| g CAG-582  | g Mycosphaerella               | -0.065253057 | 0.399288428 | 0.909588897 |
| g CAG-582  | g Simplicillium                | 0.004357398  | 0.955161751 | 0.99717368  |
| g CAG-582  | g unclassified Cordycipitaceae | 0.008020584  | 0.917569799 | 0.996251765 |
| g CAG-582  | g unidentified                 | -0.026102267 | 0.736216062 | 0.975769198 |
| g CAG-1000 | g Verticillium                 | -0.004066341 | 0.958153945 | 0.997284329 |
| g CAG-1000 | g unclassified Tremellomycetes | -0.066946493 | 0.387139811 | 0.906305988 |
| g CAG-1000 | g Candida                      | -0.084959573 | 0.272089085 | 0.884529209 |

|                   |                                |              |             |             |
|-------------------|--------------------------------|--------------|-------------|-------------|
| g CAG-1000        | g Cladosporium                 | 0.09517001   | 0.218388836 | 0.874689648 |
| g CAG-1000        | g Debaryomyces                 | -0.046134957 | 0.551428787 | 0.942564508 |
| g CAG-1000        | g Aspergillus                  | 0.013357173  | 0.86315279  | 0.994526835 |
| g CAG-1000        | g Kazachstania                 | -0.027088857 | 0.726634625 | 0.972631421 |
| g CAG-1000        | g Malassezia                   | -0.00165786  | 0.98293276  | 0.998625698 |
| g CAG-1000        | g unclassified Fungi           | -0.029470977 | 0.703676786 | 0.967508066 |
| g CAG-1000        | g Fusarium                     | 0.041626948  | 0.591014098 | 0.947252808 |
| g CAG-1000        | g Mycosphaerella               | 0.014043078  | 0.856199577 | 0.994526835 |
| g CAG-1000        | g Simplicillium                | 0.014818875  | 0.848348454 | 0.994526835 |
| g CAG-1000        | g unclassified Cordycipitaceae | -0.0564936   | 0.465665874 | 0.927602832 |
| g CAG-1000        | g unidentified                 | 0.077409828  | 0.317135827 | 0.898525398 |
| g CAG-776         | g Verticillium                 | -0.009135748 | 0.906158192 | 0.99585652  |
| g CAG-776         | g unclassified Tremellomycetes | 0.016246728  | 0.833937911 | 0.994526835 |
| g CAG-776         | g Candida                      | 0.007275303  | 0.925205882 | 0.996251765 |
| g CAG-776         | g Cladosporium                 | -0.016147575 | 0.834936877 | 0.994526835 |
| g CAG-776         | g Debaryomyces                 | -0.019328976 | 0.80302425  | 0.988396129 |
| g CAG-776         | g Aspergillus                  | 0.0730495    | 0.345242615 | 0.900151743 |
| g CAG-776         | g Kazachstania                 | -0.017012938 | 0.826227375 | 0.993650851 |
| g CAG-776         | g Malassezia                   | -0.067879942 | 0.380539883 | 0.90490297  |
| g CAG-776         | g unclassified Fungi           | -0.10496976  | 0.174389275 | 0.870154383 |
| g CAG-776         | g Fusarium                     | -0.071113094 | 0.358214372 | 0.900151743 |
| g CAG-776         | g Mycosphaerella               | -0.022964354 | 0.766955151 | 0.982494893 |
| g CAG-776         | g Simplicillium                | 0.055268878  | 0.47540733  | 0.93028395  |
| g CAG-776         | g unclassified Cordycipitaceae | 0.027988061  | 0.717938574 | 0.97067915  |
| g CAG-776         | g unidentified                 | 0.023426382  | 0.762404912 | 0.982076388 |
| g CAG-302         | g Verticillium                 | 0.039866811  | 0.60681387  | 0.950933357 |
| g CAG-302         | g unclassified Tremellomycetes | -0.092369642 | 0.232302497 | 0.874689648 |
| g CAG-302         | g Candida                      | -0.053903572 | 0.486396294 | 0.932872225 |
| g CAG-302         | g Cladosporium                 | 0.102590006  | 0.184417161 | 0.873641816 |
| g CAG-302         | g Debaryomyces                 | -0.091248037 | 0.23804643  | 0.874689648 |
| g CAG-302         | g Aspergillus                  | -0.027906217 | 0.718728599 | 0.970778853 |
| g CAG-302         | g Kazachstania                 | 0.119258322  | 0.122499035 | 0.849176369 |
| g CAG-302         | g Malassezia                   | 0.019923752  | 0.797092315 | 0.987463135 |
| g CAG-302         | g unclassified Fungi           | -0.039083257 | 0.613907035 | 0.951172976 |
| g CAG-302         | g Fusarium                     | -0.042047836 | 0.587263981 | 0.947150582 |
| g CAG-302         | g Mycosphaerella               | -0.069811682 | 0.367100823 | 0.901117392 |
| g CAG-302         | g Simplicillium                | 0.078619397  | 0.309610156 | 0.897967316 |
| g CAG-302         | g unclassified Cordycipitaceae | -0.076691133 | 0.321663222 | 0.988854824 |
| g CAG-302         | g unidentified                 | 0.056081502  | 0.468931383 | 0.928769554 |
| g CAG-1193        | g Verticillium                 | -0.108265079 | 0.161177527 | 0.859887758 |
| g CAG-1193        | g unclassified Tremellomycetes | 0.020714241  | 0.789226446 | 0.986710331 |
| g CAG-1193        | g Candida                      | -0.052002786 | 0.501919007 | 0.936281889 |
| g CAG-1193        | g Cladosporium                 | 0.033178104  | 0.668482091 | 0.960389755 |
| g CAG-1193        | g Debaryomyces                 | 0.05308674   | 0.493035238 | 0.933370788 |
| g CAG-1193        | g Aspergillus                  | 0.082489986  | 0.286320014 | 0.891214772 |
| g CAG-1193        | g Kazachstania                 | 0.006785758  | 0.930225475 | 0.996251765 |
| g CAG-1193        | g Malassezia                   | -0.003403809 | 0.964967185 | 0.998625698 |
| g CAG-1193        | g unclassified Fungi           | -0.058184698 | 0.452397425 | 0.923868417 |
| g CAG-1193        | g Fusarium                     | 0.060017693  | 0.43825786  | 0.919726905 |
| g CAG-1193        | g Mycosphaerella               | 0.053569584  | 0.489105038 | 0.932872225 |
| g CAG-1193        | g Simplicillium                | 0.028905688  | 0.709101536 | 0.968657831 |
| g CAG-1193        | g unclassified Cordycipitaceae | -0.086681873 | 0.262453181 | 0.878368327 |
| g CAG-1193        | g unidentified                 | 0.110200545  | 0.153775248 | 0.85006873  |
| g Turicibacter    | g Verticillium                 | -0.028168974 | 0.716193319 | 0.97067915  |
| g Turicibacter    | g unclassified Tremellomycetes | -0.012699708 | 0.869827575 | 0.994526835 |
| g Turicibacter    | g Candida                      | 0.041342021  | 0.593558982 | 0.947273049 |
| g Turicibacter    | g Cladosporium                 | 0.009029448  | 0.907245182 | 0.996251765 |
| g Turicibacter    | g Debaryomyces                 | 0.036893585  | 0.633918221 | 0.954116909 |
| g Turicibacter    | g Aspergillus                  | 0.010944757  | 0.887688172 | 0.994526835 |
| g Turicibacter    | g Kazachstania                 | 0.050873829  | 0.51126009  | 0.937937083 |
| g Turicibacter    | g Malassezia                   | -0.045384703 | 0.557926361 | 0.942564508 |
| g Turicibacter    | g unclassified Fungi           | -0.118437941 | 0.125111041 | 0.849176369 |
| g Turicibacter    | g Fusarium                     | -0.08670231  | 0.26234026  | 0.878368327 |
| g Turicibacter    | g Mycosphaerella               | -0.0358927   | 0.643155502 | 0.955341199 |
| g Turicibacter    | g Simplicillium                | 0.03522999   | 0.649302061 | 0.955501166 |
| g Turicibacter    | g unclassified Cordycipitaceae | -0.043149697 | 0.577498451 | 0.943638597 |
| g Turicibacter    | g unidentified                 | -0.034751272 | 0.653756909 | 0.956331535 |
| g MGYG-HGUT-00374 | g Verticillium                 | 0.003669916  | 0.962230304 | 0.998373457 |
| g MGYG-HGUT-00374 | g unclassified Tremellomycetes | 0.070007578  | 0.365754552 | 0.901117392 |
| g MGYG-HGUT-00374 | g Candida                      | -0.014512519 | 0.851447058 | 0.994526835 |
| g MGYG-HGUT-00374 | g Cladosporium                 | 0.063750866  | 0.410253016 | 0.913116876 |
| g MGYG-HGUT-00374 | g Debaryomyces                 | -0.106605407 | 0.167734736 | 0.864987015 |
| g MGYG-HGUT-00374 | g Aspergillus                  | 0.001204434  | 0.987600227 | 0.999049974 |
| g MGYG-HGUT-00374 | g Kazachstania                 | 0.014027189  | 0.856360525 | 0.994526835 |
| g MGYG-HGUT-00374 | g Malassezia                   | 0.02805853   | 0.717258594 | 0.97067915  |
| g MGYG-HGUT-00374 | g unclassified Fungi           | -0.034389989 | 0.657127057 | 0.956614192 |
| g MGYG-HGUT-00374 | g Fusarium                     | -0.009807342 | 0.89929479  | 0.995280411 |
| g MGYG-HGUT-00374 | g Mycosphaerella               | -0.023656285 | 0.760143754 | 0.982076388 |



|                   |                                       |              |             |             |
|-------------------|---------------------------------------|--------------|-------------|-------------|
| g MGYG-HGUT-00374 | g <i>Simplicillium</i>                | 0.114724324  | 0.137476096 | 0.849249996 |
| g MGYG-HGUT-00374 | g unclassified <i>Cordycipitaceae</i> | -0.003900658 | 0.959857504 | 0.997919102 |
| g MGYG-HGUT-00374 | g unidentified                        | -0.035384844 | 0.647863672 | 0.955501166 |
| g CAG-631         | g <i>Verticillium</i>                 | 0.06392454   | 0.408976372 | 0.913116876 |
| g CAG-631         | g unclassified <i>Tremellomycetes</i> | 0.00588339   | 0.939485066 | 0.996744391 |
| g CAG-631         | g <i>Candida</i>                      | 0.041885464  | 0.588709424 | 0.947252808 |
| g CAG-631         | g <i>Cladosporium</i>                 | 0.204126095  | 0.007767019 | 0.613926619 |
| g CAG-631         | g <i>Debaryomyces</i>                 | -0.021271041 | 0.783698633 | 0.986412495 |
| g CAG-631         | g <i>Aspergillus</i>                  | 0.115378913  | 0.135231264 | 0.849249996 |
| g CAG-631         | g <i>Kazachstania</i>                 | 0.085953878  | 0.266497277 | 0.878368327 |
| g CAG-631         | g <i>Malassezia</i>                   | 0.107841704  | 0.16283172  | 0.859887758 |
| g CAG-631         | g unclassified <i>Fungi</i>           | -0.083802872 | 0.278693674 | 0.889320764 |
| g CAG-631         | g <i>Fusarium</i>                     | 0.076714108  | 0.321517846 | 0.898854824 |
| g CAG-631         | g <i>Mycosphaerella</i>               | 0.039084515  | 0.613895615 | 0.951172976 |
| g CAG-631         | g <i>Simplicillium</i>                | -0.000185894 | 0.998086131 | 0.999334917 |
| g CAG-631         | g unclassified <i>Cordycipitaceae</i> | 0.086179607  | 0.265238808 | 0.878368327 |
| g CAG-631         | g unidentified                        | -0.034409502 | 0.656944857 | 0.956614192 |
| g CAG-449         | g <i>Verticillium</i>                 | 0.015698766  | 0.839461932 | 0.994526835 |
| g CAG-449         | g unclassified <i>Tremellomycetes</i> | -0.009151432 | 0.905997825 | 0.995855465 |
| g CAG-449         | g <i>Candida</i>                      | -0.062104168 | 0.422473773 | 0.917547795 |
| g CAG-449         | g <i>Cladosporium</i>                 | -0.063646717 | 0.411019721 | 0.913695764 |
| g CAG-449         | g <i>Debaryomyces</i>                 | -0.004809327 | 0.950516972 | 0.99717368  |
| g CAG-449         | g <i>Aspergillus</i>                  | 0.092794393  | 0.230152932 | 0.874689648 |
| g CAG-449         | g <i>Kazachstania</i>                 | -0.053510756 | 0.489582981 | 0.932872225 |
| g CAG-449         | g <i>Malassezia</i>                   | -0.05977773  | 0.440094462 | 0.91979111  |
| g CAG-449         | g unclassified <i>Fungi</i>           | -0.254131007 | 0.000855781 | 0.534709451 |
| g CAG-449         | g <i>Fusarium</i>                     | 0.010167561  | 0.895616554 | 0.995135868 |
| g CAG-449         | g <i>Mycosphaerella</i>               | 0.03361798   | 0.664351704 | 0.959259869 |
| g CAG-449         | g <i>Simplicillium</i>                | 0.00980132   | 0.899356298 | 0.995280411 |
| g CAG-449         | g unclassified <i>Cordycipitaceae</i> | -0.000859737 | 0.991148741 | 0.999049974 |
| g CAG-449         | g unidentified                        | 0.02129553   | 0.783455754 | 0.986399684 |
| g UBA4855         | g <i>Verticillium</i>                 | 0.016962145  | 0.826738013 | 0.993650851 |
| g UBA4855         | g unclassified <i>Tremellomycetes</i> | 0.161217334  | 0.036261023 | 0.808354944 |
| g UBA4855         | g <i>Candida</i>                      | 0.051483528  | 0.506204246 | 0.936546622 |
| g UBA4855         | g <i>Cladosporium</i>                 | 0.068503032  | 0.376172703 | 0.903077197 |
| g UBA4855         | g <i>Debaryomyces</i>                 | 0.035210955  | 0.649478964 | 0.955501166 |
| g UBA4855         | g <i>Aspergillus</i>                  | 0.082260936  | 0.287664701 | 0.891214772 |
| g UBA4855         | g <i>Kazachstania</i>                 | -0.006731442 | 0.930782588 | 0.996251765 |
| g UBA4855         | g <i>Malassezia</i>                   | -0.01427374  | 0.85386375  | 0.994526835 |
| g UBA4855         | g unclassified <i>Fungi</i>           | 0.022582451  | 0.770722308 | 0.984136305 |
| g UBA4855         | g <i>Fusarium</i>                     | 0.052115169  | 0.500994068 | 0.936281889 |
| g UBA4855         | g <i>Mycosphaerella</i>               | -0.069399111 | 0.369946171 | 0.901117392 |
| g UBA4855         | g <i>Simplicillium</i>                | -0.030445681 | 0.694358261 | 0.966217026 |
| g UBA4855         | g unclassified <i>Cordycipitaceae</i> | -0.072157736 | 0.35117913  | 0.900151743 |
| g UBA4855         | g unidentified                        | -0.043827362 | 0.571530357 | 0.942564508 |
| g Gemella         | g <i>Verticillium</i>                 | -0.056132955 | 0.468522972 | 0.928769554 |
| g Gemella         | g unclassified <i>Tremellomycetes</i> | -0.0245897   | 0.750984405 | 0.980278684 |
| g Gemella         | g <i>Candida</i>                      | 0.00609727   | 0.937289575 | 0.996251765 |
| g Gemella         | g <i>Cladosporium</i>                 | -0.081579309 | 0.291691296 | 0.892181547 |
| g Gemella         | g <i>Debaryomyces</i>                 | -0.020287813 | 0.793467085 | 0.986710331 |
| g Gemella         | g <i>Aspergillus</i>                  | 0.209176091  | 0.006345581 | 0.613926619 |
| g Gemella         | g <i>Kazachstania</i>                 | 0.132862536  | 0.085062842 | 0.8415005   |
| g Gemella         | g <i>Malassezia</i>                   | -0.04303971  | 0.57846983  | 0.944119536 |
| g Gemella         | g unclassified <i>Fungi</i>           | 0.124141837  | 0.107814778 | 0.843328451 |
| g Gemella         | g <i>Fusarium</i>                     | -0.063456746 | 0.412420386 | 0.914221644 |
| g Gemella         | g <i>Mycosphaerella</i>               | 0.086977376  | 0.260823676 | 0.878368327 |
| g Gemella         | g <i>Simplicillium</i>                | -0.032236185 | 0.677359994 | 0.962963695 |
| g Gemella         | g unclassified <i>Cordycipitaceae</i> | -0.090296007 | 0.242999326 | 0.874689648 |
| g Gemella         | g unidentified                        | 0.078138708  | 0.31258678  | 0.898139407 |
| g Staphylococcus  | g <i>Verticillium</i>                 | -0.112190245 | 0.146435547 | 0.849249996 |
| g Staphylococcus  | g unclassified <i>Tremellomycetes</i> | -0.018384343 | 0.812468484 | 0.991049439 |
| g Staphylococcus  | g <i>Candida</i>                      | 0.08060814   | 0.297492856 | 0.892181547 |
| g Staphylococcus  | g <i>Cladosporium</i>                 | -0.104201074 | 0.177583276 | 0.872371283 |
| g Staphylococcus  | g <i>Debaryomyces</i>                 | 0.088104179  | 0.254673805 | 0.874689648 |
| g Staphylococcus  | g <i>Aspergillus</i>                  | 0.099121886  | 0.199779162 | 0.874689648 |
| g Staphylococcus  | g <i>Kazachstania</i>                 | 0.132937212  | 0.084886098 | 0.8415005   |
| g Staphylococcus  | g <i>Malassezia</i>                   | -0.011235187 | 0.884728238 | 0.994526835 |
| g Staphylococcus  | g unclassified <i>Fungi</i>           | 0.070633597  | 0.361472805 | 0.900157702 |
| g Staphylococcus  | g <i>Fusarium</i>                     | -0.118355058 | 0.125377304 | 0.849176369 |
| g Staphylococcus  | g <i>Mycosphaerella</i>               | 0.027859449  | 0.719180175 | 0.970812911 |
| g Staphylococcus  | g <i>Simplicillium</i>                | -0.20467386  | 0.007600235 | 0.613926619 |
| g Staphylococcus  | g unclassified <i>Cordycipitaceae</i> | -0.17335225  | 0.024199538 | 0.765986149 |
| g Staphylococcus  | g unidentified                        | -0.025063383 | 0.746349454 | 0.979147232 |
| g CAG-313         | g <i>Verticillium</i>                 | 0.047945234  | 0.535904303 | 0.941323418 |
| g CAG-313         | g unclassified <i>Tremellomycetes</i> | -0.071236903 | 0.35737601  | 0.900151743 |
| g CAG-313         | g <i>Candida</i>                      | -0.053012569 | 0.493640447 | 0.933554982 |
| g CAG-313         | g <i>Cladosporium</i>                 | -0.098229111 | 0.20387948  | 0.874689648 |
| g CAG-313         | g <i>Debaryomyces</i>                 | -0.050888242 | 0.511140269 | 0.937903764 |

|               |                                |              |             |             |
|---------------|--------------------------------|--------------|-------------|-------------|
| g CAG-313     | g Aspergillus                  | 0.113798811  | 0.140698472 | 0.849249996 |
| g CAG-313     | g Kazachstania                 | -0.131439344 | 0.088487971 | 0.8415005   |
| g CAG-313     | g Malassezia                   | -0.084654738 | 0.27381925  | 0.886311878 |
| g CAG-313     | g unclassified_Fungi           | -0.075626697 | 0.328445039 | 0.899370541 |
| g CAG-313     | g Fusarium                     | -0.072223428 | 0.350739646 | 0.900151743 |
| g CAG-313     | g Mycosphaerella               | 0.012203883  | 0.874867455 | 0.994526835 |
| g CAG-313     | g Simplicillium                | 0.066206218  | 0.392422774 | 0.907694413 |
| g CAG-313     | g unclassified_Cordycipitaceae | 0.056301639  | 0.467185431 | 0.928418018 |
| g CAG-313     | g unidentified                 | 0.01054176   | 0.891797916 | 0.994653074 |
| g UBA1737     | g Verticillium                 | -0.072199471 | 0.350899883 | 0.900151743 |
| g UBA1737     | g unclassified_Tremellomycetes | 0.15901423   | 0.038922939 | 0.808354944 |
| g UBA1737     | g Candida                      | -0.000303012 | 0.996880348 | 0.999334917 |
| g UBA1737     | g Cladosporium                 | 0.15089465   | 0.050194883 | 0.832568254 |
| g UBA1737     | g Debaryomyces                 | -0.035025515 | 0.651203352 | 0.955597379 |
| g UBA1737     | g Aspergillus                  | 0.060952752  | 0.431143012 | 0.918239588 |
| g UBA1737     | g Kazachstania                 | -0.001365774 | 0.985939373 | 0.999049974 |
| g UBA1737     | g Malassezia                   | -0.023934774 | 0.757407463 | 0.981293944 |
| g UBA1737     | g unclassified_Fungi           | 0.04135123   | 0.59347665  | 0.947273049 |
| g UBA1737     | g Fusarium                     | -0.046887381 | 0.544949656 | 0.942564508 |
| g UBA1737     | g Mycosphaerella               | -0.057039161 | 0.461362117 | 0.927602832 |
| g UBA1737     | g Simplicillium                | 0.023924463  | 0.757508722 | 0.981293944 |
| g UBA1737     | g unclassified_Cordycipitaceae | -0.088479866 | 0.25264578  | 0.874689648 |
| g UBA1737     | g unidentified                 | -0.038379362 | 0.620309786 | 0.952309753 |
| g Tener-01    | g Verticillium                 | 0.037248484  | 0.630656253 | 0.953998129 |
| g Tener-01    | g unclassified_Tremellomycetes | -0.063369934 | 0.413061391 | 0.915150306 |
| g Tener-01    | g Candida                      | -0.099562585 | 0.197777275 | 0.874689648 |
| g Tener-01    | g Cladosporium                 | 0.042918526  | 0.579540976 | 0.944505395 |
| g Tener-01    | g Debaryomyces                 | 0.014994272  | 0.846575449 | 0.994526835 |
| g Tener-01    | g Aspergillus                  | 0.033689501  | 0.663681084 | 0.959259869 |
| g Tener-01    | g Kazachstania                 | 0.005853817  | 0.93978867  | 0.996925697 |
| g Tener-01    | g Malassezia                   | 0.022460784  | 0.771923586 | 0.984485347 |
| g Tener-01    | g unclassified_Fungi           | -0.013008766 | 0.866688746 | 0.994526835 |
| g Tener-01    | g Fusarium                     | -0.10628371  | 0.169028384 | 0.864987015 |
| g Tener-01    | g Mycosphaerella               | -0.006737709 | 0.930718307 | 0.996251765 |
| g Tener-01    | g Simplicillium                | 0.105158156  | 0.173612989 | 0.869335176 |
| g Tener-01    | g unclassified_Cordycipitaceae | 0.01156831   | 0.881335153 | 0.994526835 |
| g Tener-01    | g unidentified                 | -0.045154003 | 0.55993173  | 0.942564508 |
| g FJAT-21963  | g Verticillium                 | 0.031478285  | 0.684535913 | 0.963892039 |
| g FJAT-21963  | g unclassified_Tremellomycetes | 0.035496598  | 0.646826425 | 0.955501166 |
| g FJAT-21963  | g Candida                      | -0.019202587 | 0.804286241 | 0.988720167 |
| g FJAT-21963  | g Cladosporium                 | -0.070686715 | 0.361110938 | 0.900157702 |
| g FJAT-21963  | g Debaryomyces                 | -0.026580665 | 0.731564837 | 0.973693103 |
| g FJAT-21963  | g Aspergillus                  | -0.005380877 | 0.944645167 | 0.996925697 |
| g FJAT-21963  | g Kazachstania                 | 0.012114283  | 0.875778747 | 0.994526835 |
| g FJAT-21963  | g Malassezia                   | -0.07500856  | 0.332425228 | 0.900151743 |
| g FJAT-21963  | g unclassified_Fungi           | -0.231539143 | 0.002454141 | 0.550026842 |
| g FJAT-21963  | g Fusarium                     | -0.005726771 | 0.941093065 | 0.996925697 |
| g FJAT-21963  | g Mycosphaerella               | 0.028287049  | 0.715055051 | 0.970380158 |
| g FJAT-21963  | g Simplicillium                | 0.03286765   | 0.671403228 | 0.96129685  |
| g FJAT-21963  | g unclassified_Cordycipitaceae | 0.036826621  | 0.6345345   | 0.954116909 |
| g FJAT-21963  | g unidentified                 | -0.119764384 | 0.120908971 | 0.849176369 |
| g Collinsella | g Verticillium                 | 0.029484493  | 0.703547266 | 0.967508066 |
| g Collinsella | g unclassified_Tremellomycetes | -0.008542025 | 0.912231591 | 0.996251765 |
| g Collinsella | g Candida                      | -0.010537833 | 0.891837969 | 0.994653074 |
| g Collinsella | g Cladosporium                 | 0.069581608  | 0.368685887 | 0.901117392 |
| g Collinsella | g Debaryomyces                 | 0.004322008  | 0.955525539 | 0.99717368  |
| g Collinsella | g Aspergillus                  | 0.116200863  | 0.132452365 | 0.849249996 |
| g Collinsella | g Kazachstania                 | -0.014297411 | 0.853624111 | 0.994526835 |
| g Collinsella | g Malassezia                   | 0.100716422  | 0.19260492  | 0.874689648 |
| g Collinsella | g unclassified_Fungi           | -0.015114138 | 0.84536423  | 0.994526835 |
| g Collinsella | g Fusarium                     | -0.058915901 | 0.446726595 | 0.921010267 |
| g Collinsella | g Mycosphaerella               | -0.024015443 | 0.756615414 | 0.981293944 |
| g Collinsella | g Simplicillium                | 0.086938007  | 0.261040367 | 0.878368327 |
| g Collinsella | g unclassified_Cordycipitaceae | 0.019732976  | 0.798993749 | 0.987463135 |
| g Collinsella | g unidentified                 | -0.059694041 | 0.440736018 | 0.920204792 |
| g Enorma      | g Verticillium                 | 0.026126343  | 0.735981753 | 0.9755988   |
| g Enorma      | g unclassified_Tremellomycetes | 0.050601232  | 0.51352899  | 0.938277062 |
| g Enorma      | g Candida                      | -0.016993246 | 0.826425332 | 0.993650851 |
| g Enorma      | g Cladosporium                 | 0.010992298  | 0.887203548 | 0.994526835 |
| g Enorma      | g Debaryomyces                 | 0.023073687  | 0.765877667 | 0.982494893 |
| g Enorma      | g Aspergillus                  | 0.130152646  | 0.091678608 | 0.8415005   |
| g Enorma      | g Kazachstania                 | -0.001085119 | 0.988828504 | 0.999049974 |
| g Enorma      | g Malassezia                   | 0.08258068   | 0.285788738 | 0.891214772 |
| g Enorma      | g unclassified_Fungi           | -0.105623495 | 0.171706531 | 0.867877301 |
| g Enorma      | g Fusarium                     | -0.034330226 | 0.657685218 | 0.956614192 |
| g Enorma      | g Mycosphaerella               | -0.046963913 | 0.544292739 | 0.942564508 |
| g Enorma      | g Simplicillium                | 0.015652351  | 0.839930202 | 0.994526835 |
| g Enorma      | g unclassified_Cordycipitaceae | 0.044822512  | 0.562819284 | 0.942564508 |

|                   |                                |              |             |             |
|-------------------|--------------------------------|--------------|-------------|-------------|
| g Enorma          | g unidentified                 | 0.048130414  | 0.534328631 | 0.940891392 |
| g Eggerthella     | g Verticillium                 | -0.022765343 | 0.768917551 | 0.98374619  |
| g Eggerthella     | g unclassified Tremellomycetes | 0.206012348  | 0.007206004 | 0.613926619 |
| g Eggerthella     | g Candida                      | 0.004631646  | 0.952342923 | 0.99717368  |
| g Eggerthella     | g Cladosporium                 | 0.02950482   | 0.703352487 | 0.967508066 |
| g Eggerthella     | g Debaryomyces                 | 0.070216588  | 0.364321523 | 0.901117392 |
| g Eggerthella     | g Aspergillus                  | 0.010911787  | 0.888024286 | 0.994526835 |
| g Eggerthella     | g Kazachstania                 | -0.004493208 | 0.953765776 | 0.99717368  |
| g Eggerthella     | g Malassezia                   | 0.057501357  | 0.457733297 | 0.925044111 |
| g Eggerthella     | g unclassified Fungi           | -0.245655209 | 0.001285072 | 0.534709451 |
| g Eggerthella     | g Fusarium                     | -0.0273379   | 0.724222623 | 0.972631421 |
| g Eggerthella     | g Mycosphaerella               | -0.031693938 | 0.682491175 | 0.963892039 |
| g Eggerthella     | g Simplicillium                | 0.095177446  | 0.218352698 | 0.874689648 |
| g Eggerthella     | g unclassified Cordycipitaceae | 0.11172494   | 0.148127723 | 0.849249996 |
| g Eggerthella     | g unidentified                 | -0.150290636 | 0.051132017 | 0.832568254 |
| g Gordonibacter   | g Verticillium                 | 0.081519445  | 0.292046713 | 0.892181547 |
| g Gordonibacter   | g unclassified Tremellomycetes | -0.040893374 | 0.5975762   | 0.948266952 |
| g Gordonibacter   | g Candida                      | -0.112203973 | 0.146385845 | 0.849249996 |
| g Gordonibacter   | g Cladosporium                 | 0.017770017  | 0.818625009 | 0.992201042 |
| g Gordonibacter   | g Debaryomyces                 | 0.009519275  | 0.902237832 | 0.995280411 |
| g Gordonibacter   | g Aspergillus                  | 0.076234058  | 0.324564194 | 0.899370541 |
| g Gordonibacter   | g Kazachstania                 | -0.040148024 | 0.604277053 | 0.950399198 |
| g Gordonibacter   | g Malassezia                   | 0.061127988  | 0.42981707  | 0.918239588 |
| g Gordonibacter   | g unclassified Fungi           | -0.168674695 | 0.028362981 | 0.77775889  |
| g Gordonibacter   | g Fusarium                     | -0.047763813 | 0.537450234 | 0.941323418 |
| g Gordonibacter   | g Mycosphaerella               | -0.079369504 | 0.305002371 | 0.897967316 |
| g Gordonibacter   | g Simplicillium                | 0.119301543  | 0.122362605 | 0.849176369 |
| g Gordonibacter   | g unclassified Cordycipitaceae | 0.128507389  | 0.09589109  | 0.8415005   |
| g Gordonibacter   | g unidentified                 | 0.041192832  | 0.594893466 | 0.947273049 |
| g CAG-1427        | g Verticillium                 | 0.047699129  | 0.53800196  | 0.941323418 |
| g CAG-1427        | g unclassified Tremellomycetes | -0.030670885 | 0.692211663 | 0.966086731 |
| g CAG-1427        | g Candida                      | -0.103069505 | 0.182363345 | 0.872371283 |
| g CAG-1427        | g Cladosporium                 | -0.025012114 | 0.746850683 | 0.979147232 |
| g CAG-1427        | g Debaryomyces                 | -0.037645474 | 0.627015851 | 0.952865795 |
| g CAG-1427        | g Aspergillus                  | 0.048693656  | 0.529550367 | 0.940412658 |
| g CAG-1427        | g Kazachstania                 | -0.054913905 | 0.478251352 | 0.931740764 |
| g CAG-1427        | g Malassezia                   | 0.058327189  | 0.451289187 | 0.923806088 |
| g CAG-1427        | g unclassified Fungi           | -0.081965284 | 0.289406626 | 0.891214772 |
| g CAG-1427        | g Fusarium                     | 0.002098102  | 0.978401567 | 0.998625698 |
| g CAG-1427        | g Mycosphaerella               | -0.021237766 | 0.784028678 | 0.986469481 |
| g CAG-1427        | g Simplicillium                | 0.082253154  | 0.287710464 | 0.891214772 |
| g CAG-1427        | g unclassified Cordycipitaceae | 0.020410605  | 0.792245349 | 0.986710331 |
| g CAG-1427        | g unidentified                 | 0.022143319  | 0.775060613 | 0.984510076 |
| g Adlercreutzia   | g Verticillium                 | 0.165321968  | 0.031710724 | 0.796627796 |
| g Adlercreutzia   | g unclassified Tremellomycetes | -0.113630903 | 0.1412892   | 0.849249996 |
| g Adlercreutzia   | g Candida                      | -0.158185108 | 0.039966457 | 0.808354944 |
| g Adlercreutzia   | g Cladosporium                 | 0.027525641  | 0.722406119 | 0.971987582 |
| g Adlercreutzia   | g Debaryomyces                 | -0.057852748 | 0.454985096 | 0.924332119 |
| g Adlercreutzia   | g Aspergillus                  | 0.043829692  | 0.571509885 | 0.942564508 |
| g Adlercreutzia   | g Kazachstania                 | -0.040249018 | 0.603367136 | 0.950399198 |
| g Adlercreutzia   | g Malassezia                   | 0.068943341  | 0.373105185 | 0.901117392 |
| g Adlercreutzia   | g unclassified Fungi           | -0.003364507 | 0.965371442 | 0.998625698 |
| g Adlercreutzia   | g Fusarium                     | -0.120115994 | 0.119813658 | 0.849176369 |
| g Adlercreutzia   | g Mycosphaerella               | -0.019681759 | 0.799504425 | 0.987463135 |
| g Adlercreutzia   | g Simplicillium                | 0.150151005  | 0.05135071  | 0.832568254 |
| g Adlercreutzia   | g unclassified Cordycipitaceae | 0.035514327  | 0.646661938 | 0.955501166 |
| g Adlercreutzia   | g unidentified                 | 0.041519797  | 0.59197055  | 0.947273049 |
| g Slackia A       | g Verticillium                 | 0.011369965  | 0.883355182 | 0.994526835 |
| g Slackia A       | g unclassified Tremellomycetes | 0.028797839  | 0.710138177 | 0.968802592 |
| g Slackia A       | g Candida                      | -0.062173843 | 0.421952445 | 0.916999262 |
| g Slackia A       | g Cladosporium                 | 0.039942778  | 0.606128102 | 0.950933357 |
| g Slackia A       | g Debaryomyces                 | -0.143700232 | 0.062332346 | 0.832568254 |
| g Slackia A       | g Aspergillus                  | 0.058191225  | 0.452346629 | 0.923868417 |
| g Slackia A       | g Kazachstania                 | 0.026521741  | 0.732137199 | 0.973693103 |
| g Slackia A       | g Malassezia                   | -0.0465411   | 0.547926823 | 0.942564508 |
| g Slackia A       | g unclassified Fungi           | -0.096895609 | 0.210116444 | 0.874689648 |
| g Slackia A       | g Fusarium                     | 0.05788892   | 0.454702722 | 0.924332119 |
| g Slackia A       | g Mycosphaerella               | -0.022673604 | 0.769822661 | 0.98374619  |
| g Slackia A       | g Simplicillium                | 0.059633691  | 0.441198992 | 0.920204792 |
| g Slackia A       | g unclassified Cordycipitaceae | -0.044139219 | 0.568793681 | 0.942564508 |
| g Slackia A       | g unidentified                 | 0.165014065  | 0.03203435  | 0.796627796 |
| g MGYG-HGUT-01153 | g Verticillium                 | 0.039944166  | 0.606115579 | 0.950933357 |
| g MGYG-HGUT-01153 | g unclassified Tremellomycetes | -0.158678994 | 0.039342066 | 0.808354944 |
| g MGYG-HGUT-01153 | g Candida                      | 0.004659746  | 0.952054136 | 0.99717368  |
| g MGYG-HGUT-01153 | g Cladosporium                 | -0.053079049 | 0.493097975 | 0.933370788 |
| g MGYG-HGUT-01153 | g Debaryomyces                 | -0.041831342 | 0.589191582 | 0.947252808 |
| g MGYG-HGUT-01153 | g Aspergillus                  | 0.088671407  | 0.25161611  | 0.874689648 |
| g MGYG-HGUT-01153 | g Kazachstania                 | -0.087620213 | 0.25730284  | 0.877677    |

|                    |                                |              |             |             |
|--------------------|--------------------------------|--------------|-------------|-------------|
| g MGYG-HGUT-01153  | g Malassezia                   | -0.022226709 | 0.774236234 | 0.984510076 |
| g MGYG-HGUT-01153  | g unclassified Fungi           | 0.090464528  | 0.242117416 | 0.874689648 |
| g MGYG-HGUT-01153  | g Fusarium                     | -0.06457864  | 0.404189269 | 0.912338681 |
| g MGYG-HGUT-01153  | g Mycosphaerella               | -0.035316114 | 0.648501918 | 0.955501166 |
| g MGYG-HGUT-01153  | g Simplicillium                | 0.092696238  | 0.230648423 | 0.874689648 |
| g MGYG-HGUT-01153  | g unclassified Cordycipitaceae | 0.01536686   | 0.842811714 | 0.994526835 |
| g MGYG-HGUT-01153  | g unidentified                 | 0.162928091  | 0.03430156  | 0.808354944 |
| g MGYG-HGUT-02957  | g Verticillium                 | 0.002584742  | 0.97339363  | 0.998625698 |
| g MGYG-HGUT-02957  | g unclassified Tremellomycetes | -0.010105708 | 0.896247988 | 0.995214763 |
| g MGYG-HGUT-02957  | g Candida                      | -0.118588739 | 0.124627715 | 0.849176369 |
| g MGYG-HGUT-02957  | g Cladosporium                 | -0.057681926 | 0.45631993  | 0.924332119 |
| g MGYG-HGUT-02957  | g Debaromyces                  | -0.020768347 | 0.78868822  | 0.986710331 |
| g MGYG-HGUT-02957  | g Aspergillus                  | -0.009238109 | 0.905111642 | 0.995657731 |
| g MGYG-HGUT-02957  | g Kazachstania                 | -0.14309633  | 0.063452239 | 0.835729559 |
| g MGYG-HGUT-02957  | g Malassezia                   | -0.01383674  | 0.858290147 | 0.994526835 |
| g MGYG-HGUT-02957  | g unclassified Fungi           | -0.150191223 | 0.051287639 | 0.832568254 |
| g MGYG-HGUT-02957  | g Fusarium                     | -0.036266843 | 0.639695993 | 0.955341199 |
| g MGYG-HGUT-02957  | g Mycosphaerella               | -0.073436908 | 0.342683498 | 0.900151743 |
| g MGYG-HGUT-02957  | g Simplicillium                | 0.183193685  | 0.017123067 | 0.702895198 |
| g MGYG-HGUT-02957  | g unclassified Cordycipitaceae | 0.013561247  | 0.861082908 | 0.994526835 |
| g MGYG-HGUT-02957  | g unidentified                 | 0.111934855  | 0.147362499 | 0.849249996 |
| g Senegalimassilia | g Verticillium                 | -0.126251966 | 0.101913677 | 0.841929371 |
| g Senegalimassilia | g unclassified Tremellomycetes | 0.052101084  | 0.50110994  | 0.936281889 |
| g Senegalimassilia | g Candida                      | -0.002679947 | 0.972414007 | 0.998625698 |
| g Senegalimassilia | g Cladosporium                 | -0.063940843 | 0.408856653 | 0.913116876 |
| g Senegalimassilia | g Debaromyces                  | -0.010491228 | 0.892313437 | 0.994653074 |
| g Senegalimassilia | g Aspergillus                  | 0.039242225  | 0.612465042 | 0.951172976 |
| g Senegalimassilia | g Kazachstania                 | -0.007542726 | 0.922465065 | 0.996251765 |
| g Senegalimassilia | g Malassezia                   | -0.076849076 | 0.320664694 | 0.898741278 |
| g Senegalimassilia | g unclassified Fungi           | -0.068558486 | 0.375785526 | 0.903077197 |
| g Senegalimassilia | g Fusarium                     | 0.056475743  | 0.465807111 | 0.927602832 |
| g Senegalimassilia | g Mycosphaerella               | -0.160794037 | 0.036760192 | 0.808354944 |
| g Senegalimassilia | g Simplicillium                | 0.018852585  | 0.807783629 | 0.989341319 |
| g Senegalimassilia | g unclassified Cordycipitaceae | -0.157883056 | 0.040352414 | 0.808354944 |
| g Senegalimassilia | g unidentified                 | 0.060267193  | 0.436352904 | 0.919176572 |
| g Lancefieldella   | g Verticillium                 | -0.111315678 | 0.14962829  | 0.849249996 |
| g Lancefieldella   | g unclassified Tremellomycetes | -0.017605493 | 0.820275701 | 0.992484281 |
| g Lancefieldella   | g Candida                      | 0.089764758  | 0.245794124 | 0.874689648 |
| g Lancefieldella   | g Cladosporium                 | -0.004381243 | 0.954916642 | 0.99717368  |
| g Lancefieldella   | g Debaromyces                  | -0.023612228 | 0.760576917 | 0.982076388 |
| g Lancefieldella   | g Aspergillus                  | 0.125002511  | 0.105376271 | 0.841929371 |
| g Lancefieldella   | g Kazachstania                 | 0.029149853  | 0.706756619 | 0.96831002  |
| g Lancefieldella   | g Malassezia                   | -0.059258414 | 0.444084089 | 0.921010267 |
| g Lancefieldella   | g unclassified Fungi           | 0.05621145   | 0.467900302 | 0.928769554 |
| g Lancefieldella   | g Fusarium                     | -0.14639694  | 0.057527507 | 0.832568254 |
| g Lancefieldella   | g Mycosphaerella               | -0.014919905 | 0.847327091 | 0.994526835 |
| g Lancefieldella   | g Simplicillium                | 9.94E-05     | 0.998977093 | 0.999603646 |
| g Lancefieldella   | g unclassified Cordycipitaceae | -0.096279472 | 0.213043967 | 0.874689648 |
| g Lancefieldella   | g unidentified                 | 0.12186167   | 0.114489285 | 0.843328451 |
| g Olsenella E      | g Verticillium                 | -0.043428326 | 0.575041089 | 0.943352947 |
| g Olsenella E      | g unclassified Tremellomycetes | 0.014225512  | 0.854352037 | 0.994526835 |
| g Olsenella E      | g Candida                      | -0.091551494 | 0.23648266  | 0.874689648 |
| g Olsenella E      | g Cladosporium                 | -0.010552223 | 0.891691173 | 0.994653074 |
| g Olsenella E      | g Debaromyces                  | -0.114573815 | 0.13799625  | 0.849249996 |
| g Olsenella E      | g Aspergillus                  | 0.073470236  | 0.342463902 | 0.900151743 |
| g Olsenella E      | g Kazachstania                 | 0.02486008   | 0.748337658 | 0.979147232 |
| g Olsenella E      | g Malassezia                   | -0.038599888 | 0.618300736 | 0.952309753 |
| g Olsenella E      | g unclassified Fungi           | -0.031022413 | 0.688865873 | 0.96434561  |
| g Olsenella E      | g Fusarium                     | 0.09638908   | 0.212521049 | 0.874689648 |
| g Olsenella E      | g Mycosphaerella               | -0.00559798  | 0.942415527 | 0.996925697 |
| g Olsenella E      | g Simplicillium                | 0.105505821  | 0.17218716  | 0.868086744 |
| g Olsenella E      | g unclassified Cordycipitaceae | -0.02249391  | 0.771596457 | 0.984434432 |
| g Olsenella E      | g unidentified                 | 0.056069259  | 0.469028583 | 0.928769554 |
| g QAMH01           | g Verticillium                 | -0.014923195 | 0.847293836 | 0.994526835 |
| g QAMH01           | g unclassified Tremellomycetes | -0.019759403 | 0.798730283 | 0.987463135 |
| g QAMH01           | g Candida                      | -0.060506079 | 0.434533421 | 0.918864392 |
| g QAMH01           | g Cladosporium                 | -0.040113959 | 0.604584099 | 0.950399198 |
| g QAMH01           | g Debaromyces                  | -0.117367812 | 0.128582629 | 0.849249996 |
| g QAMH01           | g Aspergillus                  | 0.123518782  | 0.109607513 | 0.843328451 |
| g QAMH01           | g Kazachstania                 | -0.020919072 | 0.787191678 | 0.986710331 |
| g QAMH01           | g Malassezia                   | 0.031879658  | 0.680732083 | 0.963552346 |
| g QAMH01           | g unclassified Fungi           | -0.027053397 | 0.726978277 | 0.972631421 |
| g QAMH01           | g Fusarium                     | -0.070269246 | 0.363961032 | 0.901117392 |
| g QAMH01           | g Mycosphaerella               | 0.022023779  | 0.776242786 | 0.984510076 |
| g QAMH01           | g Simplicillium                | 0.048972999  | 0.527188574 | 0.940363396 |
| g QAMH01           | g unclassified Cordycipitaceae | -0.001931743 | 0.980113745 | 0.998625698 |
| g QAMH01           | g unidentified                 | 0.099842126  | 0.196515016 | 0.874689648 |
| g Bifidobacterium  | g Verticillium                 | -0.05574111  | 0.471638123 | 0.928769554 |



|                   |                                |              |             |             |
|-------------------|--------------------------------|--------------|-------------|-------------|
| g Bifidobacterium | g unclassified Tremellomycetes | 0.05525522   | 0.475516583 | 0.93028395  |
| g Bifidobacterium | g Candida                      | 0.131761715  | 0.087702643 | 0.8415005   |
| g Bifidobacterium | g Cladosporium                 | 0.016034392  | 0.836077523 | 0.994526835 |
| g Bifidobacterium | g Debaryomyces                 | 0.001754152  | 0.981941628 | 0.998625698 |
| g Bifidobacterium | g Aspergillus                  | 0.094082477  | 0.223720065 | 0.874689648 |
| g Bifidobacterium | g Kazachstania                 | 0.061957668  | 0.423571148 | 0.918013177 |
| g Bifidobacterium | g Malassezia                   | 0.06807362   | 0.379179121 | 0.90490297  |
| g Bifidobacterium | g unclassified Fungi           | -0.025713699 | 0.740000978 | 0.977217936 |
| g Bifidobacterium | g Fusarium                     | 0.124801884  | 0.105940786 | 0.841929371 |
| g Bifidobacterium | g Mycosphaerella               | 0.051597302  | 0.505263682 | 0.936546622 |
| g Bifidobacterium | g Simplicillium                | 0.017160617  | 0.824743132 | 0.993093205 |
| g Bifidobacterium | g unclassified Cordycipitaceae | -0.010739747 | 0.889778491 | 0.994653074 |
| g Bifidobacterium | g unidentified                 | 0.075932515  | 0.326487247 | 0.899370541 |
| g Pauljensia      | g Verticillium                 | -0.079387697 | 0.304891178 | 0.897967316 |
| g Pauljensia      | g unclassified Tremellomycetes | 0.065197661  | 0.399689639 | 0.909828919 |
| g Pauljensia      | g Candida                      | 0.198138534  | 0.009813338 | 0.613926619 |
| g Pauljensia      | g Cladosporium                 | 0.048504694  | 0.531151022 | 0.940412658 |
| g Pauljensia      | g Debaryomyces                 | 0.01463812   | 0.850176397 | 0.994526835 |
| g Pauljensia      | g Aspergillus                  | 0.238772251  | 0.001769914 | 0.550026842 |
| g Pauljensia      | g Kazachstania                 | 0.130833408  | 0.089979288 | 0.8415005   |
| g Pauljensia      | g Malassezia                   | 0.004442444  | 0.954287551 | 0.99717368  |
| g Pauljensia      | g unclassified Fungi           | 0.011100688  | 0.886098798 | 0.994526835 |
| g Pauljensia      | g Fusarium                     | -0.105255814 | 0.173211599 | 0.868752404 |
| g Pauljensia      | g Mycosphaerella               | 0.027348919  | 0.724115959 | 0.972631421 |
| g Pauljensia      | g Simplicillium                | 0.009356561  | 0.90390079  | 0.995280411 |
| g Pauljensia      | g unclassified Cordycipitaceae | -0.081758109 | 0.290631449 | 0.892181547 |
| g Pauljensia      | g unidentified                 | 0.075834309  | 0.327115125 | 0.899370541 |
| g Actinomyces     | g Verticillium                 | -0.139699933 | 0.070061299 | 0.8415005   |
| g Actinomyces     | g unclassified Tremellomycetes | 0.116176063  | 0.132535567 | 0.849249996 |
| g Actinomyces     | g Candida                      | 0.135762125  | 0.078413463 | 0.8415005   |
| g Actinomyces     | g Cladosporium                 | 0.055536929  | 0.473265823 | 0.928769554 |
| g Actinomyces     | g Debaryomyces                 | 0.025662628  | 0.740498914 | 0.977217936 |
| g Actinomyces     | g Aspergillus                  | 0.18439034   | 0.016399584 | 0.702895198 |
| g Actinomyces     | g Kazachstania                 | 0.185853351  | 0.01555134  | 0.702895198 |
| g Actinomyces     | g Malassezia                   | -0.024620449 | 0.750683254 | 0.980278684 |
| g Actinomyces     | g unclassified Fungi           | -0.067938552 | 0.380127782 | 0.90490297  |
| g Actinomyces     | g Fusarium                     | 0.058103106  | 0.453032697 | 0.923868417 |
| g Actinomyces     | g Mycosphaerella               | -0.032924015 | 0.670872511 | 0.96129685  |
| g Actinomyces     | g Simplicillium                | 0.005688909  | 0.941481826 | 0.996925697 |
| g Actinomyces     | g unclassified Cordycipitaceae | -0.078019671 | 0.313326781 | 0.898307298 |
| g Actinomyces     | g unidentified                 | -0.000537523 | 0.994465969 | 0.999049974 |
| g Rothia          | g Verticillium                 | -0.104339383 | 0.177005419 | 0.872371283 |
| g Rothia          | g unclassified Tremellomycetes | -0.036544305 | 0.637135446 | 0.954338328 |
| g Rothia          | g Candida                      | 0.009657938  | 0.900821008 | 0.995280411 |
| g Rothia          | g Cladosporium                 | 0.012389048  | 0.87298472  | 0.994526835 |
| g Rothia          | g Debaryomyces                 | -0.083388988 | 0.28108293  | 0.8902203   |
| g Rothia          | g Aspergillus                  | 0.107162506  | 0.165511913 | 0.864354699 |
| g Rothia          | g Kazachstania                 | 0.061197671  | 0.429290452 | 0.918239588 |
| g Rothia          | g Malassezia                   | -0.077517289 | 0.316462454 | 0.898525398 |
| g Rothia          | g unclassified Fungi           | 0.214000132  | 0.005209353 | 0.613926619 |
| g Rothia          | g Fusarium                     | 0.025661968  | 0.740505356 | 0.977217936 |
| g Rothia          | g Mycosphaerella               | -0.019188591 | 0.80442602  | 0.988760253 |
| g Rothia          | g Simplicillium                | -0.088157616 | 0.254384659 | 0.874689648 |
| g Rothia          | g unclassified Cordycipitaceae | -0.203149511 | 0.008072446 | 0.613926619 |
| g Rothia          | g unidentified                 | 0.089266305  | 0.248436621 | 0.874689648 |
| g Corynebacterium | g Verticillium                 | -0.234153957 | 0.002183091 | 0.550026842 |
| g Corynebacterium | g unclassified Tremellomycetes | 0.165501714  | 0.031523087 | 0.796627796 |
| g Corynebacterium | g Candida                      | 0.057117664  | 0.460744648 | 0.927602832 |
| g Corynebacterium | g Cladosporium                 | -0.090992626 | 0.23936821  | 0.874689648 |
| g Corynebacterium | g Debaryomyces                 | -0.059239633 | 0.44422876  | 0.921010267 |
| g Corynebacterium | g Aspergillus                  | 0.170914571  | 0.026298637 | 0.765986149 |
| g Corynebacterium | g Kazachstania                 | 0.078466891  | 0.31055252  | 0.897967316 |
| g Corynebacterium | g Malassezia                   | -0.102155433 | 0.186293161 | 0.873641816 |
| g Corynebacterium | g unclassified Fungi           | -0.038586755 | 0.618420309 | 0.952309753 |
| g Corynebacterium | g Fusarium                     | 0.055792168  | 0.47123157  | 0.928769554 |
| g Corynebacterium | g Mycosphaerella               | -0.004390586 | 0.954820602 | 0.99717368  |
| g Corynebacterium | g Simplicillium                | -0.043732102 | 0.57236754  | 0.942985175 |
| g Corynebacterium | g unclassified Cordycipitaceae | -0.157032956 | 0.041455504 | 0.808354944 |
| g Corynebacterium | g unidentified                 | -0.005023962 | 0.948311591 | 0.996925697 |
| g UBA11452        | g Verticillium                 | -0.045334565 | 0.558361894 | 0.942564508 |
| g UBA11452        | g unclassified Tremellomycetes | -0.055304324 | 0.475123837 | 0.93028395  |
| g UBA11452        | g Candida                      | -0.016412431 | 0.832269032 | 0.994526835 |
| g UBA11452        | g Cladosporium                 | -0.019636857 | 0.7999522   | 0.987507186 |
| g UBA11452        | g Debaryomyces                 | -0.00335222  | 0.965497821 | 0.998625698 |
| g UBA11452        | g Aspergillus                  | 0.133352333  | 0.083908947 | 0.8415005   |
| g UBA11452        | g Kazachstania                 | -0.028788281 | 0.710230074 | 0.968802592 |
| g UBA11452        | g Malassezia                   | 0.01413241   | 0.855294796 | 0.994526835 |
| g UBA11452        | g unclassified Fungi           | 0.083268588  | 0.281780553 | 0.8902203   |

|                   |                                |              |             |             |
|-------------------|--------------------------------|--------------|-------------|-------------|
| g UBA11452        | g Fusarium                     | 0.044843497  | 0.562636279 | 0.942564508 |
| g UBA11452        | g Mycosphaerella               | -0.027084865 | 0.726673314 | 0.972631421 |
| g UBA11452        | g Simplicillium                | 0.095721397  | 0.215720696 | 0.874689648 |
| g UBA11452        | g unclassified Cordycipitaceae | -0.087055263 | 0.260395337 | 0.878368327 |
| g UBA11452        | g unidentified                 | 0.029106032  | 0.707177269 | 0.96831002  |
| g UBA1829         | g Verticillium                 | 0.001414954  | 0.985433118 | 0.999049974 |
| g UBA1829         | g unclassified Tremellomycetes | -0.183007315 | 0.017238206 | 0.702895198 |
| g UBA1829         | g Candida                      | -0.161968943 | 0.0353888   | 0.808354944 |
| g UBA1829         | g Cladosporium                 | -0.101948998 | 0.187189198 | 0.873641816 |
| g UBA1829         | g Debaromyces                  | -0.006534275 | 0.932805164 | 0.996251765 |
| g UBA1829         | g Aspergillus                  | 0.013617011  | 0.860517469 | 0.994526835 |
| g UBA1829         | g Kazachstania                 | -0.132753926 | 0.085320428 | 0.8415005   |
| g UBA1829         | g Malassezia                   | -0.011553072 | 0.881490316 | 0.994526835 |
| g UBA1829         | g unclassified Fungi           | 0.01354622   | 0.861235293 | 0.994526835 |
| g UBA1829         | g Fusarium                     | 0.000706781  | 0.992723419 | 0.999049974 |
| g UBA1829         | g Mycosphaerella               | -0.053936092 | 0.486132977 | 0.932872225 |
| g UBA1829         | g Simplicillium                | 0.039904966  | 0.606469396 | 0.950933357 |
| g UBA1829         | g unclassified Cordycipitaceae | -0.043149191 | 0.577502922 | 0.943638597 |
| g UBA1829         | g unidentified                 | 0.131368402  | 0.088661546 | 0.8415005   |
| g MGYG-HGUT-00666 | g Verticillium                 | 0.010229957  | 0.894979645 | 0.995135868 |
| g MGYG-HGUT-00666 | g unclassified Tremellomycetes | -0.108278643 | 0.161124737 | 0.859887758 |
| g MGYG-HGUT-00666 | g Candida                      | -0.071108271 | 0.358247061 | 0.900151743 |
| g MGYG-HGUT-00666 | g Cladosporium                 | -0.078399944 | 0.310966787 | 0.897967316 |
| g MGYG-HGUT-00666 | g Debaromyces                  | -0.006968535 | 0.928351021 | 0.996251765 |
| g MGYG-HGUT-00666 | g Aspergillus                  | 0.12476683   | 0.106039663 | 0.841929371 |
| g MGYG-HGUT-00666 | g Kazachstania                 | 0.026791901  | 0.729514192 | 0.973318574 |
| g MGYG-HGUT-00666 | g Malassezia                   | 0.034865674  | 0.65269119  | 0.955763754 |
| g MGYG-HGUT-00666 | g unclassified Fungi           | -0.033963645 | 0.661113017 | 0.958878901 |
| g MGYG-HGUT-00666 | g Fusarium                     | 0.003005479  | 0.969064726 | 0.998625698 |
| g MGYG-HGUT-00666 | g Mycosphaerella               | 0.012466632  | 0.872196065 | 0.994526835 |
| g MGYG-HGUT-00666 | g Simplicillium                | 0.093493703  | 0.226644491 | 0.874689648 |
| g MGYG-HGUT-00666 | g unclassified Cordycipitaceae | -0.003348033 | 0.965540895 | 0.998625698 |
| g MGYG-HGUT-00666 | g unidentified                 | 0.075615881  | 0.328514416 | 0.899370541 |
| g Victivallis     | g Verticillium                 | 0.038203114  | 0.621917464 | 0.952309753 |
| g Victivallis     | g unclassified Tremellomycetes | -0.150966433 | 0.050084466 | 0.832568254 |
| g Victivallis     | g Candida                      | -0.077263678 | 0.318053123 | 0.898525398 |
| g Victivallis     | g Cladosporium                 | -0.112676721 | 0.144682091 | 0.849249996 |
| g Victivallis     | g Debaromyces                  | -0.00784059  | 0.919413336 | 0.996251765 |
| g Victivallis     | g Aspergillus                  | 0.063238371  | 0.414033937 | 0.915150306 |
| g Victivallis     | g Kazachstania                 | -0.043628138 | 0.573281872 | 0.942985175 |
| g Victivallis     | g Malassezia                   | 0.000767222  | 0.992101176 | 0.999049974 |
| g Victivallis     | g unclassified Fungi           | 0.016856487  | 0.827800455 | 0.993650851 |
| g Victivallis     | g Fusarium                     | -0.029656504 | 0.701899631 | 0.967505184 |
| g Victivallis     | g Mycosphaerella               | -0.048895521 | 0.527843102 | 0.940363396 |
| g Victivallis     | g Simplicillium                | 0.077864379  | 0.314293881 | 0.898525398 |
| g Victivallis     | g unclassified Cordycipitaceae | -0.069687844 | 0.367953467 | 0.901117392 |
| g Victivallis     | g unidentified                 | 0.04939702   | 0.523613763 | 0.939740222 |
| g MGYG-HGUT-00608 | g Verticillium                 | -0.024540963 | 0.751461803 | 0.980278684 |
| g MGYG-HGUT-00608 | g unclassified Tremellomycetes | 0.037052254  | 0.632458979 | 0.954068873 |
| g MGYG-HGUT-00608 | g Candida                      | -0.096805398 | 0.210543261 | 0.874689648 |
| g MGYG-HGUT-00608 | g Cladosporium                 | 0.031721963  | 0.682225615 | 0.963892039 |
| g MGYG-HGUT-00608 | g Debaromyces                  | -0.061876654 | 0.4241787   | 0.918239588 |
| g MGYG-HGUT-00608 | g Aspergillus                  | 0.011731879  | 0.879669878 | 0.994526835 |
| g MGYG-HGUT-00608 | g Kazachstania                 | 0.104550132  | 0.176127578 | 0.871837921 |
| g MGYG-HGUT-00608 | g Malassezia                   | 0.003559197  | 0.963368986 | 0.998529304 |
| g MGYG-HGUT-00608 | g unclassified Fungi           | -0.01528626  | 0.843625609 | 0.994526835 |
| g MGYG-HGUT-00608 | g Fusarium                     | -0.042610657 | 0.582266371 | 0.944873255 |
| g MGYG-HGUT-00608 | g Mycosphaerella               | -0.04028388  | 0.603053188 | 0.950399198 |
| g MGYG-HGUT-00608 | g Simplicillium                | 0.077547693  | 0.31627211  | 0.898525398 |
| g MGYG-HGUT-00608 | g unclassified Cordycipitaceae | -0.075562886 | 0.328854498 | 0.899622647 |
| g MGYG-HGUT-00608 | g unidentified                 | 0.056032835  | 0.469317851 | 0.928769554 |
| g MGYG-HGUT-00971 | g Verticillium                 | 0.072205451  | 0.350859878 | 0.900151743 |
| g MGYG-HGUT-00971 | g unclassified Tremellomycetes | -0.023407395 | 0.76259175  | 0.982076388 |
| g MGYG-HGUT-00971 | g Candida                      | -0.045646215 | 0.555657351 | 0.942564508 |
| g MGYG-HGUT-00971 | g Cladosporium                 | 0.037979196  | 0.623962561 | 0.952309753 |
| g MGYG-HGUT-00971 | g Debaromyces                  | -0.058889769 | 0.446928568 | 0.921010267 |
| g MGYG-HGUT-00971 | g Aspergillus                  | 0.051419192  | 0.506736512 | 0.936546622 |
| g MGYG-HGUT-00971 | g Kazachstania                 | -0.003646498 | 0.962471146 | 0.998402776 |
| g MGYG-HGUT-00971 | g Malassezia                   | 0.04437942   | 0.566690056 | 0.942564508 |
| g MGYG-HGUT-00971 | g unclassified Fungi           | 0.133813165  | 0.082834789 | 0.8415005   |
| g MGYG-HGUT-00971 | g Fusarium                     | -0.009941712 | 0.897922473 | 0.995280411 |
| g MGYG-HGUT-00971 | g Mycosphaerella               | 0.090084382  | 0.24410998  | 0.874689648 |
| g MGYG-HGUT-00971 | g Simplicillium                | -0.048420058 | 0.531868746 | 0.940412658 |
| g MGYG-HGUT-00971 | g unclassified Cordycipitaceae | 0.112729404  | 0.144493162 | 0.849249996 |
| g MGYG-HGUT-00971 | g unidentified                 | 0.116731942  | 0.130680305 | 0.849249996 |
| g Akkermansia     | g Verticillium                 | 0.014573908  | 0.850825967 | 0.994526835 |
| g Akkermansia     | g unclassified Tremellomycetes | -0.112715042 | 0.144544646 | 0.849249996 |
| g Akkermansia     | g Candida                      | 0.010100871  | 0.896297363 | 0.995214763 |

|               |                                |              |             |              |
|---------------|--------------------------------|--------------|-------------|--------------|
| g Akkermansia | g Cladosporium                 | -0.096399969 | 0.212469152 | 0.874689648  |
| g Akkermansia | g Debaryomyces                 | -0.014125676 | 0.855362999 | 0.994526835  |
| g Akkermansia | g Aspergillus                  | 0.066339511  | 0.391468347 | 0.907694413  |
| g Akkermansia | g Kazachstania                 | 0.025918376  | 0.738006501 | 0.976420387  |
| g Akkermansia | g Malassezia                   | 0.001718399  | 0.982309626 | 0.998625698  |
| g Akkermansia | g unclassified Fungi           | -0.071308676 | 0.356890568 | 0.900151743  |
| g Akkermansia | g Fusarium                     | -0.105538999 | 0.172051548 | 0.867877301  |
| g Akkermansia | g Mycosphaerella               | -0.01464855  | 0.850070898 | 0.994526835  |
| g Akkermansia | g Simplicillium                | 0.125865792  | 0.102974157 | 0.841929371  |
| g Akkermansia | g unclassified Cordycipitaceae | 0.025012931  | 0.746842699 | 0.979147232  |
| g Akkermansia | g unidentified                 | 0.08383056   | 0.27853433  | 0.889320764  |
| g CAG-312     | g Verticillium                 | -0.026403139 | 0.733289696 | 0.973693103  |
| g CAG-312     | g unclassified Tremellomycetes | -0.154091333 | 0.045469697 | 0.825673201  |
| g CAG-312     | g Candida                      | -0.066914945 | 0.387364071 | 0.9066329959 |
| g CAG-312     | g Cladosporium                 | -0.024106731 | 0.7557194   | 0.981293944  |
| g CAG-312     | g Debaryomyces                 | -0.062151202 | 0.422121815 | 0.916999262  |
| g CAG-312     | g Aspergillus                  | -0.064657811 | 0.403612106 | 0.912338681  |
| g CAG-312     | g Kazachstania                 | -0.070079218 | 0.365262976 | 0.901117392  |
| g CAG-312     | g Malassezia                   | -0.075745372 | 0.327684407 | 0.899370541  |
| g CAG-312     | g unclassified Fungi           | 0.060727366  | 0.432851873 | 0.918239588  |
| g CAG-312     | g Fusarium                     | -0.068495022 | 0.376228652 | 0.903077197  |
| g CAG-312     | g Mycosphaerella               | -0.079720257 | 0.30286331  | 0.896894041  |
| g CAG-312     | g Simplicillium                | -0.005100045 | 0.947529937 | 0.996925697  |
| g CAG-312     | g unclassified Cordycipitaceae | -0.123503718 | 0.109651144 | 0.843328451  |
| g CAG-312     | g unidentified                 | 0.08285871   | 0.284164186 | 0.8902203    |
| g CAG-484     | g Verticillium                 | 0.090953281  | 0.239572277 | 0.874689648  |
| g CAG-484     | g unclassified Tremellomycetes | 0.044718506  | 0.563726727 | 0.942564508  |
| g CAG-484     | g Candida                      | -0.08917671  | 0.248913683 | 0.874689648  |
| g CAG-484     | g Cladosporium                 | 0.028224519  | 0.715657771 | 0.970611741  |
| g CAG-484     | g Debaryomyces                 | -0.056523986 | 0.465425589 | 0.927602832  |
| g CAG-484     | g Aspergillus                  | 0.031297168  | 0.686254978 | 0.963892039  |
| g CAG-484     | g Kazachstania                 | -0.074120103 | 0.338199847 | 0.900151743  |
| g CAG-484     | g Malassezia                   | 0.066073317  | 0.393375789 | 0.907694413  |
| g CAG-484     | g unclassified Fungi           | -0.142423267 | 0.064719745 | 0.836350979  |
| g CAG-484     | g Fusarium                     | -0.116501309 | 0.131447613 | 0.849249996  |
| g CAG-484     | g Mycosphaerella               | -0.091564669 | 0.236414929 | 0.874689648  |
| g CAG-484     | g Simplicillium                | 0.06905563   | 0.372325358 | 0.901117392  |
| g CAG-484     | g unclassified Cordycipitaceae | 0.054970978  | 0.477793469 | 0.931740764  |
| g CAG-484     | g unidentified                 | 0.003543736  | 0.963528003 | 0.998529304  |
| g Zag1        | g Verticillium                 | 0.034491436  | 0.65618003  | 0.956614192  |
| g Zag1        | g unclassified Tremellomycetes | -0.131680229 | 0.087900622 | 0.8415005    |
| g Zag1        | g Candida                      | -0.059083282 | 0.445434138 | 0.921010267  |
| g Zag1        | g Cladosporium                 | -0.007648426 | 0.921381995 | 0.996251765  |
| g Zag1        | g Debaryomyces                 | -0.020609767 | 0.790264827 | 0.986710331  |
| g Zag1        | g Aspergillus                  | 0.093452476  | 0.226850273 | 0.874689648  |
| g Zag1        | g Kazachstania                 | 0.013196459  | 0.864783533 | 0.994526835  |
| g Zag1        | g Malassezia                   | 0.07577285   | 0.327508453 | 0.899370541  |
| g Zag1        | g unclassified Fungi           | 0.124599391  | 0.106512956 | 0.842981324  |
| g Zag1        | g Fusarium                     | 0.060766472  | 0.43255091  | 0.918239588  |
| g Zag1        | g Mycosphaerella               | 0.011572399  | 0.881293521 | 0.994526835  |
| g Zag1        | g Simplicillium                | 0.04860695   | 0.530284532 | 0.940412658  |
| g Zag1        | g unclassified Cordycipitaceae | 0.008748461  | 0.910119286 | 0.996251765  |
| g Zag1        | g unidentified                 | 0.245836421  | 0.001274133 | 0.534709451  |
| g CAG-196     | g Verticillium                 | 0.020410048  | 0.792250882 | 0.986710331  |
| g CAG-196     | g unclassified Tremellomycetes | -0.226392172 | 0.003078566 | 0.550026842  |
| g CAG-196     | g Candida                      | -0.115832638 | 0.133691817 | 0.849249996  |
| g CAG-196     | g Cladosporium                 | -0.019299288 | 0.803320635 | 0.988396129  |
| g CAG-196     | g Debaryomyces                 | -0.069321978 | 0.370479634 | 0.901117392  |
| g CAG-196     | g Aspergillus                  | 0.20496444   | 0.007513057 | 0.613926619  |
| g CAG-196     | g Kazachstania                 | -0.044181144 | 0.568426244 | 0.942564508  |
| g CAG-196     | g Malassezia                   | 0.015942864  | 0.837000181 | 0.994526835  |
| g CAG-196     | g unclassified Fungi           | 0.179595446  | 0.019468166 | 0.702895198  |
| g CAG-196     | g Fusarium                     | -0.049731074 | 0.520806148 | 0.939569324  |
| g CAG-196     | g Mycosphaerella               | -0.008864071 | 0.908936614 | 0.996251765  |
| g CAG-196     | g Simplicillium                | 0.078740563  | 0.308862779 | 0.897967316  |
| g CAG-196     | g unclassified Cordycipitaceae | -0.05357867  | 0.489031239 | 0.932872225  |
| g CAG-196     | g unidentified                 | 0.205955418  | 0.007222394 | 0.613926619  |
| g Zag111      | g Verticillium                 | 0.094952175  | 0.219449378 | 0.874689648  |
| g Zag111      | g unclassified Tremellomycetes | -0.096547116 | 0.211768712 | 0.874689648  |
| g Zag111      | g Candida                      | -0.105553606 | 0.171991867 | 0.867877301  |
| g Zag111      | g Cladosporium                 | 0.042610735  | 0.582265672 | 0.944873255  |
| g Zag111      | g Debaryomyces                 | -0.062338074 | 0.420725106 | 0.916661525  |
| g Zag111      | g Aspergillus                  | 0.07769487   | 0.315351738 | 0.898525398  |
| g Zag111      | g Kazachstania                 | -0.068958464 | 0.373000102 | 0.901117392  |
| g Zag111      | g Malassezia                   | 0.02207535   | 0.775732716 | 0.984510076  |
| g Zag111      | g unclassified Fungi           | -0.153009654 | 0.047025176 | 0.829549289  |
| g Zag111      | g Fusarium                     | -0.054549993 | 0.481176544 | 0.932872225  |
| g Zag111      | g Mycosphaerella               | -0.090329209 | 0.242825394 | 0.874689648  |

|                     |                                |              |             |             |
|---------------------|--------------------------------|--------------|-------------|-------------|
| g_Zag111            | g_Simplicillium                | 0.118964989  | 0.123428082 | 0.849176369 |
| g_Zag111            | g_unclassified_Cordycipitaceae | 0.022799781  | 0.768577862 | 0.98374619  |
| g_Zag111            | g_unidentified                 | 0.106367205  | 0.168691914 | 0.864987015 |
| g_UBA6984           | g_Verticillium                 | 0.012247923  | 0.874419599 | 0.994526835 |
| g_UBA6984           | g_unclassified_Tremellomycetes | -0.201238607 | 0.008701057 | 0.613926619 |
| g_UBA6984           | g_Candida                      | -0.048400438 | 0.532035191 | 0.940412658 |
| g_UBA6984           | g_Cladosporium                 | 0.013236135  | 0.864380884 | 0.994526835 |
| g_UBA6984           | g_Debaromyces                  | -0.104051911 | 0.178208037 | 0.872371283 |
| g_UBA6984           | g_Aspergillus                  | 0.18014982   | 0.01908967  | 0.702895198 |
| g_UBA6984           | g_Kazachstania                 | -0.079595101 | 0.303625435 | 0.897548306 |
| g_UBA6984           | g_Malassezia                   | -0.024911651 | 0.747833165 | 0.979147232 |
| g_UBA6984           | g_unclassified_Fungi           | 0.132947762  | 0.084861152 | 0.8415005   |
| g_UBA6984           | g_Fusarium                     | -0.041768707 | 0.5897498   | 0.947252808 |
| g_UBA6984           | g_Mycosphaerella               | -0.042231625 | 0.58562985  | 0.946404098 |
| g_UBA6984           | g_Simplicillium                | 0.123234972  | 0.110431829 | 0.843328451 |
| g_UBA6984           | g_unclassified_Cordycipitaceae | -0.074768174 | 0.333981379 | 0.900151743 |
| g_UBA6984           | g_unidentified                 | 0.189886041  | 0.013408249 | 0.69108662  |
| g_Gastranaerophilus | g_Verticillium                 | 0.07966536   | 0.303197447 | 0.897245885 |
| g_Gastranaerophilus | g_unclassified_Tremellomycetes | -0.216439283 | 0.004707294 | 0.613926619 |
| g_Gastranaerophilus | g_Candida                      | -0.035853072 | 0.643522374 | 0.955445353 |
| g_Gastranaerophilus | g_Cladosporium                 | -0.010150094 | 0.89579486  | 0.995135868 |
| g_Gastranaerophilus | g_Debaromyces                  | -0.038536427 | 0.6188786   | 0.952309753 |
| g_Gastranaerophilus | g_Aspergillus                  | 0.036570588  | 0.636893121 | 0.954338328 |
| g_Gastranaerophilus | g_Kazachstania                 | -0.094765864 | 0.220359348 | 0.874689648 |
| g_Gastranaerophilus | g_Malassezia                   | -0.018705462 | 0.809254895 | 0.989767396 |
| g_Gastranaerophilus | g_unclassified_Fungi           | -0.090290508 | 0.243028144 | 0.874689648 |
| g_Gastranaerophilus | g_Fusarium                     | -0.12990013  | 0.0923154   | 0.8415005   |
| g_Gastranaerophilus | g_Mycosphaerella               | -0.077610092 | 0.315881683 | 0.98525398  |
| g_Gastranaerophilus | g_Simplicillium                | 0.116806744  | 0.130432185 | 0.849249996 |
| g_Gastranaerophilus | g_unclassified_Cordycipitaceae | -0.055579259 | 0.472928126 | 0.928769554 |
| g_Gastranaerophilus | g_unidentified                 | 0.064978969  | 0.401275878 | 0.910743236 |
| g_UBA2883           | g_Verticillium                 | 0.072255428  | 0.350525684 | 0.900151743 |
| g_UBA2883           | g_unclassified_Tremellomycetes | -0.018740871 | 0.808900741 | 0.989645702 |
| g_UBA2883           | g_Candida                      | -0.121988957 | 0.114108391 | 0.843328451 |
| g_UBA2883           | g_Cladosporium                 | 0.049888152  | 0.519488612 | 0.939250598 |
| g_UBA2883           | g_Debaromyces                  | -0.106889352 | 0.166599037 | 0.864987015 |
| g_UBA2883           | g_Aspergillus                  | 0.153297586  | 0.046606853 | 0.828771778 |
| g_UBA2883           | g_Kazachstania                 | 0.093413345  | 0.227045716 | 0.874689648 |
| g_UBA2883           | g_Malassezia                   | 0.025085496  | 0.746133306 | 0.979082173 |
| g_UBA2883           | g_unclassified_Fungi           | 0.117607307  | 0.127799315 | 0.849249996 |
| g_UBA2883           | g_Fusarium                     | -0.047793618 | 0.53719611  | 0.941323418 |
| g_UBA2883           | g_Mycosphaerella               | -0.098897283 | 0.200805048 | 0.874689648 |
| g_UBA2883           | g_Simplicillium                | 0.035578696  | 0.646064872 | 0.955501166 |
| g_UBA2883           | g_unclassified_Cordycipitaceae | -0.021579862 | 0.780637347 | 0.985787047 |
| g_UBA2883           | g_unidentified                 | 0.071410524  | 0.356202411 | 0.900151743 |
| g_Cloacibacillus    | g_Verticillium                 | 0.15276864   | 0.047377739 | 0.832568254 |
| g_Cloacibacillus    | g_unclassified_Tremellomycetes | 0.057094922  | 0.460923479 | 0.927602832 |
| g_Cloacibacillus    | g_Candida                      | -0.124141638 | 0.107815347 | 0.843328451 |
| g_Cloacibacillus    | g_Cladosporium                 | 0.043113252  | 0.577820242 | 0.943818057 |
| g_Cloacibacillus    | g_Debaromyces                  | -0.090951809 | 0.239579915 | 0.874689648 |
| g_Cloacibacillus    | g_Aspergillus                  | 0.013637797  | 0.860306723 | 0.994526835 |
| g_Cloacibacillus    | g_Kazachstania                 | -0.098961431 | 0.200511662 | 0.874689648 |
| g_Cloacibacillus    | g_Malassezia                   | 0.047681104  | 0.538155757 | 0.941323418 |
| g_Cloacibacillus    | g_unclassified_Fungi           | 0.054228595  | 0.483767999 | 0.932872225 |
| g_Cloacibacillus    | g_Fusarium                     | 0.000229865  | 0.997633425 | 0.999334917 |
| g_Cloacibacillus    | g_Mycosphaerella               | -0.011155778 | 0.88553738  | 0.994526835 |
| g_Cloacibacillus    | g_Simplicillium                | 0.170100548  | 0.027033476 | 0.767417994 |
| g_Cloacibacillus    | g_unclassified_Cordycipitaceae | 0.160003189  | 0.037708341 | 0.808354944 |
| g_Cloacibacillus    | g_unidentified                 | 0.13283354   | 0.085131549 | 0.8415005   |
| g_Pyramidobacter    | g_Verticillium                 | 0.097742133  | 0.206141475 | 0.874689648 |
| g_Pyramidobacter    | g_unclassified_Tremellomycetes | 0.046018891  | 0.552431562 | 0.942564508 |
| g_Pyramidobacter    | g_Candida                      | -0.020501164 | 0.791344638 | 0.986710331 |
| g_Pyramidobacter    | g_Cladosporium                 | 0.062765986  | 0.417536971 | 0.916661525 |
| g_Pyramidobacter    | g_Debaromyces                  | -0.107160419 | 0.1655202   | 0.864354699 |
| g_Pyramidobacter    | g_Aspergillus                  | 0.17673268   | 0.021527814 | 0.742601833 |
| g_Pyramidobacter    | g_Kazachstania                 | 0.113814931  | 0.140641862 | 0.849249996 |
| g_Pyramidobacter    | g_Malassezia                   | -0.009294541 | 0.904534752 | 0.995453822 |
| g_Pyramidobacter    | g_unclassified_Fungi           | -0.022659904 | 0.769957863 | 0.98374619  |
| g_Pyramidobacter    | g_Fusarium                     | -0.042172555 | 0.586154834 | 0.946920767 |
| g_Pyramidobacter    | g_Mycosphaerella               | 0.010654495  | 0.890647951 | 0.994653074 |
| g_Pyramidobacter    | g_Simplicillium                | 0.036808162  | 0.634704426 | 0.954116909 |
| g_Pyramidobacter    | g_unclassified_Cordycipitaceae | 0.131616414  | 0.088055919 | 0.8415005   |
| g_Pyramidobacter    | g_unidentified                 | 0.075277013  | 0.330692878 | 0.900151743 |
| g_Fusobacterium_A   | g_Verticillium                 | -0.032765445 | 0.672365985 | 0.96129685  |
| g_Fusobacterium_A   | g_unclassified_Tremellomycetes | 0.187087456  | 0.01486582  | 0.702895198 |
| g_Fusobacterium_A   | g_Candida                      | -0.049209209 | 0.525195628 | 0.939740222 |
| g_Fusobacterium_A   | g_Cladosporium                 | 0.03410157   | 0.659822486 | 0.95760929  |
| g_Fusobacterium_A   | g_Debaromyces                  | 0.102619177  | 0.184291731 | 0.873641816 |



|                   |                                |              |             |             |
|-------------------|--------------------------------|--------------|-------------|-------------|
| g Fusobacterium A | g Aspergillus                  | 0.095860252  | 0.215052462 | 0.874689648 |
| g Fusobacterium A | g Kazachstania                 | -0.026350094 | 0.733805349 | 0.973693103 |
| g Fusobacterium A | g Malassezia                   | 0.062594105  | 0.418815862 | 0.916661525 |
| g Fusobacterium A | g unclassified Fungi           | -0.081919448 | 0.289677315 | 0.891214772 |
| g Fusobacterium A | g Fusarium                     | -0.079194432 | 0.306073753 | 0.897967316 |
| g Fusobacterium A | g Mycosphaerella               | -0.041416124 | 0.592896636 | 0.947273049 |
| g Fusobacterium A | g Simplicillium                | 0.063770365  | 0.410109567 | 0.913116876 |
| g Fusobacterium A | g unclassified Cordycipitaceae | 0.006230646  | 0.935920697 | 0.996251765 |
| g Fusobacterium A | g unidentified                 | -0.197493999 | 0.010059764 | 0.613926619 |
| g Fusobacterium   | g Verticillium                 | -0.023758942 | 0.759134748 | 0.982076388 |
| g Fusobacterium   | g unclassified Tremellomycetes | 0.121967583  | 0.114172281 | 0.843328451 |
| g Fusobacterium   | g Candida                      | 0.050555602  | 0.513909285 | 0.938277062 |
| g Fusobacterium   | g Cladosporium                 | 0.046084431  | 0.551865201 | 0.942564508 |
| g Fusobacterium   | g Debaryomyces                 | -0.086837668 | 0.261593204 | 0.878368327 |
| g Fusobacterium   | g Aspergillus                  | 0.096779619  | 0.210665345 | 0.874689648 |
| g Fusobacterium   | g Kazachstania                 | 0.008709435  | 0.91051856  | 0.996251765 |
| g Fusobacterium   | g Malassezia                   | -0.069444512 | 0.369632393 | 0.901117392 |
| g Fusobacterium   | g unclassified Fungi           | -0.045122109 | 0.560209248 | 0.942564508 |
| g Fusobacterium   | g Fusarium                     | -0.068343415 | 0.377288511 | 0.904355365 |
| g Fusobacterium   | g Mycosphaerella               | 0.001079992  | 0.988881281 | 0.999049974 |
| g Fusobacterium   | g Simplicillium                | 0.013780798  | 0.858857108 | 0.994526835 |
| g Fusobacterium   | g unclassified Cordycipitaceae | 0.02736431   | 0.723966994 | 0.972631421 |
| g Fusobacterium   | g unidentified                 | -0.032823443 | 0.671819582 | 0.96129685  |
| g Fusobacterium B | g Verticillium                 | -0.053985178 | 0.485735674 | 0.932872225 |
| g Fusobacterium B | g unclassified Tremellomycetes | 0.232073108  | 0.00239643  | 0.550026842 |
| g Fusobacterium B | g Candida                      | -0.04180904  | 0.589390317 | 0.947252808 |
| g Fusobacterium B | g Cladosporium                 | 0.155837174  | 0.043049895 | 0.812441332 |
| g Fusobacterium B | g Debaryomyces                 | -0.003362754 | 0.965389473 | 0.998625698 |
| g Fusobacterium B | g Aspergillus                  | 0.134260671  | 0.08180229  | 0.8415005   |
| g Fusobacterium B | g Kazachstania                 | -0.049571192 | 0.52214894  | 0.939740222 |
| g Fusobacterium B | g Malassezia                   | -0.01989689  | 0.797359973 | 0.987463135 |
| g Fusobacterium B | g unclassified Fungi           | -0.175505508 | 0.022466719 | 0.756488856 |
| g Fusobacterium B | g Fusarium                     | -0.018411721 | 0.812194375 | 0.991049439 |
| g Fusobacterium B | g Mycosphaerella               | -0.030530822 | 0.693546434 | 0.966086731 |
| g Fusobacterium B | g Simplicillium                | 0.005760626  | 0.940745456 | 0.996925697 |
| g Fusobacterium B | g unclassified Cordycipitaceae | 0.008621691  | 0.911416351 | 0.996251765 |
| g Fusobacterium B | g unidentified                 | -0.204238901 | 0.007732408 | 0.613926619 |
| g Cetobacterium A | g Verticillium                 | -0.097900774 | 0.205402619 | 0.874689648 |
| g Cetobacterium A | g unclassified Tremellomycetes | 0.213014349  | 0.005425505 | 0.613926619 |
| g Cetobacterium A | g Candida                      | -0.034962646 | 0.651788384 | 0.955597379 |
| g Cetobacterium A | g Cladosporium                 | 0.10631207   | 0.168914043 | 0.864987015 |
| g Cetobacterium A | g Debaryomyces                 | 0.118582746  | 0.124646894 | 0.849176369 |
| g Cetobacterium A | g Aspergillus                  | 0.056655274  | 0.464388179 | 0.927602832 |
| g Cetobacterium A | g Kazachstania                 | 0.045851514  | 0.553879208 | 0.942564508 |
| g Cetobacterium A | g Malassezia                   | 0.040966523  | 0.596920384 | 0.948043977 |
| g Cetobacterium A | g unclassified Fungi           | -0.188372322 | 0.014180285 | 0.702895198 |
| g Cetobacterium A | g Fusarium                     | 0.024741648  | 0.749496624 | 0.980027605 |
| g Cetobacterium A | g Mycosphaerella               | -0.043641612 | 0.573163337 | 0.942985175 |
| g Cetobacterium A | g Simplicillium                | -0.053349105 | 0.490897595 | 0.932872225 |
| g Cetobacterium A | g unclassified Cordycipitaceae | -0.077433515 | 0.316987316 | 0.898525398 |
| g Cetobacterium A | g unidentified                 | -0.157725126 | 0.040555457 | 0.808354944 |
| g Leptotrichia    | g Verticillium                 | -0.015959615 | 0.836831305 | 0.994526835 |
| g Leptotrichia    | g unclassified Tremellomycetes | -0.027798396 | 0.719769828 | 0.971131388 |
| g Leptotrichia    | g Candida                      | -0.022229916 | 0.774204544 | 0.984510076 |
| g Leptotrichia    | g Cladosporium                 | -0.028219875 | 0.715702545 | 0.970611741 |
| g Leptotrichia    | g Debaryomyces                 | 0.053505033  | 0.489629494 | 0.932872225 |
| g Leptotrichia    | g Aspergillus                  | 0.047771631  | 0.537383572 | 0.941323418 |
| g Leptotrichia    | g Kazachstania                 | 0.000717116  | 0.992617023 | 0.999049974 |
| g Leptotrichia    | g Malassezia                   | -0.086025138 | 0.266099552 | 0.878368327 |
| g Leptotrichia    | g unclassified Fungi           | 0.00633344   | 0.934865821 | 0.996251765 |
| g Leptotrichia    | g Fusarium                     | -0.134854733 | 0.08044766  | 0.8415005   |
| g Leptotrichia    | g Mycosphaerella               | 0.014571174  | 0.850853619 | 0.994526835 |
| g Leptotrichia    | g Simplicillium                | -0.167803576 | 0.0292024   | 0.780931419 |
| g Leptotrichia    | g unclassified Cordycipitaceae | -0.014871381 | 0.847817617 | 0.994526835 |
| g Leptotrichia    | g unidentified                 | -0.041607835 | 0.591184655 | 0.947252808 |
| g MGYG-HGUT-01171 | g Verticillium                 | -0.007763665 | 0.920201349 | 0.996251765 |
| g MGYG-HGUT-01171 | g unclassified Tremellomycetes | -0.045491156 | 0.557002184 | 0.942564508 |
| g MGYG-HGUT-01171 | g Candida                      | -0.04085124  | 0.597954096 | 0.948266952 |
| g MGYG-HGUT-01171 | g Cladosporium                 | -0.024202289 | 0.75478183  | 0.980873421 |
| g MGYG-HGUT-01171 | g Debaryomyces                 | -0.08775063  | 0.256592551 | 0.876137258 |
| g MGYG-HGUT-01171 | g Aspergillus                  | 0.091993772  | 0.234216429 | 0.874689648 |
| g MGYG-HGUT-01171 | g Kazachstania                 | -0.029773815 | 0.700776741 | 0.967505184 |
| g MGYG-HGUT-01171 | g Malassezia                   | -0.039124666 | 0.613531272 | 0.951172976 |
| g MGYG-HGUT-01171 | g unclassified Fungi           | 0.148787462  | 0.053527373 | 0.832568254 |
| g MGYG-HGUT-01171 | g Fusarium                     | 0.009277124  | 0.9047128   | 0.995453822 |
| g MGYG-HGUT-01171 | g Mycosphaerella               | -0.004106345 | 0.957742647 | 0.997257748 |
| g MGYG-HGUT-01171 | g Simplicillium                | 0.144764849  | 0.060397572 | 0.832568254 |
| g MGYG-HGUT-01171 | g unclassified Cordycipitaceae | -0.070485313 | 0.362484191 | 0.901117392 |

|                   |                                |              |             |             |
|-------------------|--------------------------------|--------------|-------------|-------------|
| g MGYG-HGUT-01171 | g unidentified                 | 0.171529816  | 0.025754653 | 0.765986149 |
| g UBA7185         | g Verticillium                 | -0.01545786  | 0.841893015 | 0.994526835 |
| g UBA7185         | g unclassified Tremellomycetes | 0.027604167  | 0.721646793 | 0.971835476 |
| g UBA7185         | g Candida                      | -0.071572061 | 0.355112663 | 0.900151743 |
| g UBA7185         | g Cladosporium                 | 0.010804531  | 0.889117855 | 0.994639994 |
| g UBA7185         | g Debaromyces                  | -0.066922961 | 0.387307085 | 0.906329959 |
| g UBA7185         | g Aspergillus                  | -0.024922923 | 0.747722907 | 0.979147232 |
| g UBA7185         | g Kazachstania                 | 0.001467753  | 0.984889623 | 0.999049974 |
| g UBA7185         | g Malassezia                   | 0.000709894  | 0.992691373 | 0.999049974 |
| g UBA7185         | g unclassified Fungi           | -0.081632557 | 0.291375395 | 0.892181547 |
| g UBA7185         | g Fusarium                     | -0.042682965 | 0.581625732 | 0.944873255 |
| g UBA7185         | g Mycosphaerella               | -0.015037524 | 0.846138356 | 0.994526835 |
| g UBA7185         | g Simplicillium                | 0.04919172   | 0.525343058 | 0.939740222 |
| g UBA7185         | g unclassified Cordycipitaceae | -0.019824058 | 0.798085795 | 0.987463135 |
| g UBA7185         | g unidentified                 | 0.067345926  | 0.384307203 | 0.906174944 |
| g MGYG-HGUT-04118 | g Verticillium                 | -0.032049089 | 0.679128783 | 0.962963695 |
| g MGYG-HGUT-04118 | g unclassified Tremellomycetes | 0.078171001  | 0.312386223 | 0.898139407 |
| g MGYG-HGUT-04118 | g Candida                      | -0.064211221 | 0.406874157 | 0.913116876 |
| g MGYG-HGUT-04118 | g Cladosporium                 | -0.011399504 | 0.883054297 | 0.994526835 |
| g MGYG-HGUT-04118 | g Debaromyces                  | -0.027339603 | 0.724206131 | 0.972631421 |
| g MGYG-HGUT-04118 | g Aspergillus                  | 0.129264362  | 0.093934267 | 0.8415005   |
| g MGYG-HGUT-04118 | g Kazachstania                 | -0.019612462 | 0.800195504 | 0.987507186 |
| g MGYG-HGUT-04118 | g Malassezia                   | -0.001551098 | 0.984031704 | 0.999015821 |
| g MGYG-HGUT-04118 | g unclassified Fungi           | -0.121968874 | 0.114168821 | 0.843328451 |
| g MGYG-HGUT-04118 | g Fusarium                     | -0.020751785 | 0.78885338  | 0.986710331 |
| g MGYG-HGUT-04118 | g Mycosphaerella               | 0.039916968  | 0.606361054 | 0.950933357 |
| g MGYG-HGUT-04118 | g Simplicillium                | -0.047336659 | 0.541098868 | 0.94160936  |
| g MGYG-HGUT-04118 | g unclassified Cordycipitaceae | 0.028510489  | 0.712902759 | 0.969808442 |
| g MGYG-HGUT-04118 | g unidentified                 | 0.044458797  | 0.565995703 | 0.942564508 |
| g Treponema D     | g Verticillium                 | -0.020221712 | 0.794124979 | 0.986879992 |
| g Treponema D     | g unclassified Tremellomycetes | -0.114254924 | 0.139103295 | 0.849249996 |
| g Treponema D     | g Candida                      | -0.044115554 | 0.569036203 | 0.942564508 |
| g Treponema D     | g Cladosporium                 | -0.037125463 | 0.631786174 | 0.954051837 |
| g Treponema D     | g Debaromyces                  | 0.041022685  | 0.596417085 | 0.947778806 |
| g Treponema D     | g Aspergillus                  | 0.127269943  | 0.099159458 | 0.8415005   |
| g Treponema D     | g Kazachstania                 | -0.089701198 | 0.24612999  | 0.874689648 |
| g Treponema D     | g Malassezia                   | -0.036854047 | 0.634282065 | 0.954116909 |
| g Treponema D     | g unclassified Fungi           | 0.071032001  | 0.358764156 | 0.900151743 |
| g Treponema D     | g Fusarium                     | -0.026665282 | 0.730743155 | 0.973690981 |
| g Treponema D     | g Mycosphaerella               | -0.035236512 | 0.649241454 | 0.955501166 |
| g Treponema D     | g Simplicillium                | 0.042200341  | 0.585907853 | 0.946687539 |
| g Treponema D     | g unclassified Cordycipitaceae | -0.180682129 | 0.018732256 | 0.702895198 |
| g Treponema D     | g unidentified                 | 0.076795932  | 0.32100045  | 0.898854824 |
| g Brachyspira     | g Verticillium                 | -0.243235601 | 0.0014396   | 0.534709451 |
| g Brachyspira     | g unclassified Tremellomycetes | 0.115184028  | 0.135896644 | 0.849249996 |
| g Brachyspira     | g Candida                      | 0.063044602  | 0.415468766 | 0.915917523 |
| g Brachyspira     | g Cladosporium                 | 0.020771678  | 0.788655723 | 0.986710331 |
| g Brachyspira     | g Debaromyces                  | 0.023376542  | 0.762895368 | 0.982076388 |
| g Brachyspira     | g Aspergillus                  | 0.199758127  | 0.009217493 | 0.613926619 |
| g Brachyspira     | g Kazachstania                 | 0.12360383   | 0.109361436 | 0.843328451 |
| g Brachyspira     | g Malassezia                   | -0.037590439 | 0.627519987 | 0.95290209  |
| g Brachyspira     | g unclassified Fungi           | 0.007163449  | 0.926352536 | 0.996251765 |
| g Brachyspira     | g Fusarium                     | -0.045566536 | 0.556348214 | 0.942564508 |
| g Brachyspira     | g Mycosphaerella               | -0.124093031 | 0.107954373 | 0.843328451 |
| g Brachyspira     | g Simplicillium                | -0.088227506 | 0.254006829 | 0.874689648 |
| g Brachyspira     | g unclassified Cordycipitaceae | -0.16554122  | 0.031481974 | 0.796627796 |
| g Brachyspira     | g unidentified                 | -0.083279842 | 0.281715298 | 0.8902203   |
| g TM7x            | g Verticillium                 | -0.044654701 | 0.564283764 | 0.942564508 |
| g TM7x            | g unclassified Tremellomycetes | 0.032227735  | 0.677439846 | 0.962963695 |
| g TM7x            | g Candida                      | 0.10272038   | 0.183857066 | 0.873641816 |
| g TM7x            | g Cladosporium                 | 0.046975197  | 0.544195922 | 0.942564508 |
| g TM7x            | g Debaromyces                  | 0.003646123  | 0.962474993 | 0.998402776 |
| g TM7x            | g Aspergillus                  | 0.169398672  | 0.027681109 | 0.773194645 |
| g TM7x            | g Kazachstania                 | 0.026386622  | 0.733450248 | 0.973693103 |
| g TM7x            | g Malassezia                   | 0.034552292  | 0.655612194 | 0.956614192 |
| g TM7x            | g unclassified Fungi           | 0.093181688  | 0.228205176 | 0.874689648 |
| g TM7x            | g Fusarium                     | -0.178981466 | 0.019894923 | 0.708689436 |
| g TM7x            | g Mycosphaerella               | 0.113961141  | 0.140129162 | 0.849249996 |
| g TM7x            | g Simplicillium                | 0.006060981  | 0.937662054 | 0.996251765 |
| g TM7x            | g unclassified Cordycipitaceae | -0.091755724 | 0.235434286 | 0.874689648 |
| g TM7x            | g unidentified                 | 0.088424884  | 0.252941883 | 0.874689648 |
| g Paenibacillus   | g Verticillium                 | -0.059167754 | 0.444782676 | 0.921010267 |
| g Paenibacillus   | g unclassified Tremellomycetes | 0.119119238  | 0.122938867 | 0.849176369 |
| g Paenibacillus   | g Candida                      | -0.002787018 | 0.971312342 | 0.998625698 |
| g Paenibacillus   | g Cladosporium                 | -0.057075808 | 0.461073815 | 0.927602832 |
| g Paenibacillus   | g Debaromyces                  | 0.0065432    | 0.932713609 | 0.996251765 |
| g Paenibacillus   | g Aspergillus                  | -0.074125548 | 0.338164267 | 0.900151743 |
| g Paenibacillus   | g Kazachstania                 | 0.001874985  | 0.980697927 | 0.998625698 |

|                           |                                |              |             |             |
|---------------------------|--------------------------------|--------------|-------------|-------------|
| g Paenibacillus           | g Malassezia                   | -0.062728894 | 0.417812769 | 0.916661525 |
| g Paenibacillus           | g unclassified Fungi           | -0.116714689 | 0.130737586 | 0.849249996 |
| g Paenibacillus           | g Fusarium                     | 0.042872574  | 0.579947382 | 0.944667116 |
| g Paenibacillus           | g Mycosphaerella               | -0.15413187  | 0.045412249 | 0.825673201 |
| g Paenibacillus           | g Simplicillium                | -0.040729934 | 0.599042692 | 0.948312951 |
| g Paenibacillus           | g unclassified Cordycipitaceae | -0.20623535  | 0.00714212  | 0.613926619 |
| g Paenibacillus           | g unidentified                 | -0.076015758 | 0.325955646 | 0.899370541 |
| g UBA4705                 | g Verticillium                 | 0.119856731  | 0.120620549 | 0.849176369 |
| g UBA4705                 | g unclassified Tremellomycetes | -0.090512843 | 0.241864981 | 0.874689648 |
| g UBA4705                 | g Candida                      | -0.053759989 | 0.487559813 | 0.932872225 |
| g UBA4705                 | g Cladosporium                 | -0.04508273  | 0.560551975 | 0.942564508 |
| g UBA4705                 | g Debaryomyces                 | -0.083908857 | 0.278084057 | 0.889320764 |
| g UBA4705                 | g Aspergillus                  | 0.033651382  | 0.664038478 | 0.959259869 |
| g UBA4705                 | g Kazachstania                 | -0.011684357 | 0.880153642 | 0.994526835 |
| g UBA4705                 | g Malassezia                   | 0.031013328  | 0.688952262 | 0.96434561  |
| g UBA4705                 | g unclassified Fungi           | 0.073922162  | 0.33949503  | 0.900151743 |
| g UBA4705                 | g Fusarium                     | 0.047545725  | 0.539311554 | 0.941536464 |
| g UBA4705                 | g Mycosphaerella               | 0.064221675  | 0.406797624 | 0.913116876 |
| g UBA4705                 | g Simplicillium                | 0.070980023  | 0.359116819 | 0.900151743 |
| g UBA4705                 | g unclassified Cordycipitaceae | 0.076201911  | 0.324768857 | 0.899370541 |
| g UBA4705                 | g unidentified                 | 0.215965126  | 0.00480135  | 0.613926619 |
| g Campylobacter B         | g Verticillium                 | -0.111128861 | 0.150317065 | 0.849249996 |
| g Campylobacter B         | g unclassified Tremellomycetes | 0.038588572  | 0.618403761 | 0.952309753 |
| g Campylobacter B         | g Candida                      | 0.06295836   | 0.416108315 | 0.916271642 |
| g Campylobacter B         | g Cladosporium                 | -0.06529595  | 0.39897794  | 0.909588897 |
| g Campylobacter B         | g Debaryomyces                 | -0.072015616 | 0.352131119 | 0.900151743 |
| g Campylobacter B         | g Aspergillus                  | 0.031893337  | 0.680602589 | 0.963552346 |
| g Campylobacter B         | g Kazachstania                 | 0.058146109  | 0.452697818 | 0.923868417 |
| g Campylobacter B         | g Malassezia                   | -0.116968087 | 0.129898235 | 0.849249996 |
| g Campylobacter B         | g unclassified Fungi           | 0.090686735  | 0.240957965 | 0.874689648 |
| g Campylobacter B         | g Fusarium                     | 0.003337836  | 0.965645783 | 0.998625698 |
| g Campylobacter B         | g Mycosphaerella               | -0.025443884 | 0.74263285  | 0.977770666 |
| g Campylobacter B         | g Simplicillium                | -0.035092582 | 0.650579492 | 0.955597379 |
| g Campylobacter B         | g unclassified Cordycipitaceae | -0.131519226 | 0.08829285  | 0.8415005   |
| g Campylobacter B         | g unidentified                 | -0.046579495 | 0.54759633  | 0.942564508 |
| g Methanobrevibacter A    | g Verticillium                 | 0.063524055  | 0.411923795 | 0.913695764 |
| g Methanobrevibacter A    | g unclassified Tremellomycetes | -0.020633596 | 0.790027957 | 0.986710331 |
| g Methanobrevibacter A    | g Candida                      | 0.020198688  | 0.794354161 | 0.98703185  |
| g Methanobrevibacter A    | g Cladosporium                 | -0.011146356 | 0.885633395 | 0.994526835 |
| g Methanobrevibacter A    | g Debaryomyces                 | -0.110246089 | 0.1536042   | 0.85006873  |
| g Methanobrevibacter A    | g Aspergillus                  | 0.080820468  | 0.296217966 | 0.892181547 |
| g Methanobrevibacter A    | g Kazachstania                 | -0.044635728 | 0.564449455 | 0.942564508 |
| g Methanobrevibacter A    | g Malassezia                   | 0.007321905  | 0.924728192 | 0.996251765 |
| g Methanobrevibacter A    | g unclassified Fungi           | -0.175781503 | 0.022252536 | 0.755138537 |
| g Methanobrevibacter A    | g Fusarium                     | 0.019667644  | 0.799645177 | 0.987488476 |
| g Methanobrevibacter A    | g Mycosphaerella               | -0.053949622 | 0.486023452 | 0.932872225 |
| g Methanobrevibacter A    | g Simplicillium                | 0.101337397  | 0.18986237  | 0.87460258  |
| g Methanobrevibacter A    | g unclassified Cordycipitaceae | 0.121753637  | 0.114813341 | 0.843328451 |
| g Methanobrevibacter A    | g unidentified                 | 0.020359618  | 0.792752584 | 0.986710331 |
| g Methanosphaera          | g Verticillium                 | 0.018476446  | 0.811546443 | 0.991049439 |
| g Methanosphaera          | g unclassified Tremellomycetes | -0.027236686 | 0.72520256  | 0.972631421 |
| g Methanosphaera          | g Candida                      | -0.011438147 | 0.882660702 | 0.994526835 |
| g Methanosphaera          | g Cladosporium                 | 0.102386327  | 0.185294688 | 0.873641816 |
| g Methanosphaera          | g Debaryomyces                 | -0.008868611 | 0.908890182 | 0.996251765 |
| g Methanosphaera          | g Aspergillus                  | 0.019398335  | 0.802331915 | 0.988396129 |
| g Methanosphaera          | g Kazachstania                 | 0.03118267   | 0.687342557 | 0.964035031 |
| g Methanosphaera          | g Malassezia                   | -0.019091565 | 0.805395207 | 0.988960513 |
| g Methanosphaera          | g unclassified Fungi           | 0.121505256  | 0.115561091 | 0.845332008 |
| g Methanosphaera          | g Fusarium                     | -0.144546777 | 0.060789814 | 0.832568254 |
| g Methanosphaera          | g Mycosphaerella               | 0.029318463  | 0.705138922 | 0.967508066 |
| g Methanosphaera          | g Simplicillium                | 0.036268938  | 0.639676645 | 0.955341199 |
| g Methanosphaera          | g unclassified Cordycipitaceae | -0.046329264 | 0.549752016 | 0.942564508 |
| g Methanosphaera          | g unidentified                 | -0.012671036 | 0.870118871 | 0.994526835 |
| g Methanomassiliococcus A | g Verticillium                 | -0.0642212   | 0.4068011   | 0.913116876 |
| g Methanomassiliococcus A | g unclassified Tremellomycetes | -0.012452898 | 0.872335668 | 0.994526835 |
| g Methanomassiliococcus A | g Candida                      | -0.115591321 | 0.134508902 | 0.849249996 |
| g Methanomassiliococcus A | g Cladosporium                 | 0.050933461  | 0.510764446 | 0.937587102 |
| g Methanomassiliococcus A | g Debaryomyces                 | -0.042315976 | 0.584880555 | 0.945928844 |
| g Methanomassiliococcus A | g Aspergillus                  | 0.063849268  | 0.409529392 | 0.913116876 |
| g Methanomassiliococcus A | g Kazachstania                 | 0.07200756   | 0.352185131 | 0.900151743 |
| g Methanomassiliococcus A | g Malassezia                   | -0.151984193 | 0.04854053  | 0.832568254 |
| g Methanomassiliococcus A | g unclassified Fungi           | 0.091388179  | 0.237323358 | 0.874689648 |
| g Methanomassiliococcus A | g Fusarium                     | -0.036945272 | 0.633442717 | 0.954116909 |
| g Methanomassiliococcus A | g Mycosphaerella               | 0.016681688  | 0.829558821 | 0.993833227 |
| g Methanomassiliococcus A | g Simplicillium                | 0.036167406  | 0.640614681 | 0.955341199 |
| g Methanomassiliococcus A | g unclassified Cordycipitaceae | -0.07257694  | 0.348380532 | 0.900151743 |
| g Methanomassiliococcus A | g unidentified                 | 0.088964372  | 0.250046833 | 0.874689648 |
| g MGYG-HGUT-01990         | g Verticillium                 | -0.075627994 | 0.328436718 | 0.899370541 |

|                   |                                |              |             |             |
|-------------------|--------------------------------|--------------|-------------|-------------|
| g MGYG-HGUT-01990 | g unclassified Tremellomycetes | 0.115115723  | 0.136130445 | 0.849249996 |
| g MGYG-HGUT-01990 | g Candida                      | 0.066605164  | 0.389570342 | 0.907620197 |
| g MGYG-HGUT-01990 | g Cladosporium                 | 0.023108285  | 0.765536791 | 0.982494893 |
| g MGYG-HGUT-01990 | g Debaryomyces                 | 0.034405333  | 0.656983787 | 0.956614192 |
| g MGYG-HGUT-01990 | g Aspergillus                  | 0.06018484   | 0.436981153 | 0.919176572 |
| g MGYG-HGUT-01990 | g Kazachstania                 | 0.085456267  | 0.269285884 | 0.880885289 |
| g MGYG-HGUT-01990 | g Malassezia                   | 0.005914572  | 0.939164957 | 0.996633988 |
| g MGYG-HGUT-01990 | g unclassified Fungi           | -0.076249483 | 0.324466023 | 0.899370541 |
| g MGYG-HGUT-01990 | g Fusarium                     | 0.0315603    | 0.683758011 | 0.963892039 |
| g MGYG-HGUT-01990 | g Mycosphaerella               | -0.053857846 | 0.486766673 | 0.932872225 |
| g MGYG-HGUT-01990 | g Simplicillium                | -0.050311801 | 0.515943668 | 0.938796978 |
| g MGYG-HGUT-01990 | g unclassified Cordycipitaceae | -0.053925099 | 0.486221979 | 0.932872225 |
| g MGYG-HGUT-01990 | g unidentified                 | -0.05367366  | 0.488260091 | 0.932872225 |
| g UBA636          | g Verticillium                 | -0.111564582 | 0.148714315 | 0.849249996 |
| g UBA636          | g unclassified Tremellomycetes | 0.050453696  | 0.514759132 | 0.938796978 |
| g UBA636          | g Candida                      | -0.039154483 | 0.613260758 | 0.951172976 |
| g UBA636          | g Cladosporium                 | -0.008017136 | 0.917605102 | 0.996251765 |
| g UBA636          | g Debaryomyces                 | 0.039162092  | 0.613191734 | 0.951172976 |
| g UBA636          | g Aspergillus                  | 0.123065693  | 0.110925802 | 0.843328451 |
| g UBA636          | g Kazachstania                 | 0.097112494  | 0.209092832 | 0.874689648 |
| g UBA636          | g Malassezia                   | 0.037303422  | 0.630151936 | 0.953903732 |
| g UBA636          | g unclassified Fungi           | -0.063841936 | 0.409583284 | 0.913116876 |
| g UBA636          | g Fusarium                     | 0.069049174  | 0.372370168 | 0.901117392 |
| g UBA636          | g Mycosphaerella               | 0.026843661  | 0.729012004 | 0.973108701 |
| g UBA636          | g Simplicillium                | 0.046011498  | 0.55249546  | 0.942564508 |
| g UBA636          | g unclassified Cordycipitaceae | -0.004844275 | 0.950157849 | 0.99717368  |
| g UBA636          | g unidentified                 | -0.024381243 | 0.753026976 | 0.980305754 |
