# Supplementary material
Source: HighWire-hosted journal article supplement (https://rmdopen.bmj.com/content/9/4/e003529)
Supplement: inline-supplementary-material-2 [file inline-supplementary-material-2.pdf]

**Supplementary Table S1. Sensitivity analysis of associations of gut fungi and bacteria with knee synovitis**

|                                     | Prevalence of knee synovitis |
|-------------------------------------|------------------------------|
| <b>Fungi</b>                        |                              |
| <i>g__Schizophyllum</i>             |                              |
| β coefficient*                      | -1.359                       |
| P value                             | 0.003                        |
| Q value                             | 0.079                        |
| <b>Bacteria</b>                     |                              |
| <i>s__Veillonella_tobetsuensis</i>  |                              |
| β coefficient*                      | 1.111                        |
| P value                             | 0.002                        |
| Q value                             | 0.076                        |
| <i>s__Lawsonibacter_sp000177015</i> |                              |
| β coefficient*                      | 0.509                        |
| P value                             | 0.001                        |
| Q value                             | 0.033                        |

\* Adjusted for age, sex, body mass index, drinking status, smoking status, and frequency of dietary intake of meat/eggs, dairy products, and vegetables, use of non-antibiotic drugs that affect the gut microbiota, physical activity, and diabetes.
